# Supplementary material
Source: publisher figshare collection journal article supplement (https://tandf.figshare.com/articles/dataset/_/3859920)
Supplement: Supplementary file 1 [file 1]

| Incremental Heating |         | 36Ar(a)<br>[fA] | 37Ar(ca)<br>[fA] | 38Ar(cl)<br>[fA] | 39Ar(k)<br>[fA] | 40Ar(r)<br>[fA] | Age ± 2σ<br>(ka) | 40Ar(r)<br>(%) | 39Ar(k)<br>(%) | K/Ca ± 2σ     |
|---------------------|---------|-----------------|------------------|------------------|-----------------|-----------------|------------------|----------------|----------------|---------------|
| 15D10306            | 2.0 %   | 0.6971382       | 65.1926          | 5.546184         | 189.3194        | 29.70029        | 501.4 ± 29.5     | 12.59          | 4.99           | 1.249 ± 0.013 |
| 15D10308            | 2.2 %   | 0.6278347       | 72.3728          | 4.669068         | 182.8930        | 29.17826        | 509.9 ± 28.5     | 13.58          | 4.82           | 1.087 ± 0.011 |
| 15D10309            | 2.4 %   | 0.3080111       | 35.6235          | 2.168002         | 87.8131         | 14.90563        | 542.5 ± 40.9     | 14.06          | 2.31           | 1.060 ± 0.017 |
| 15D10310            | 2.6 %   | 0.5540815       | 102.1165         | 3.494237         | 193.5573        | 30.90593        | 510.3 ± 25.2     | 15.86          | 5.10           | 0.815 ± 0.007 |
| 15D10312            | 2.8 %   | 0.4860847       | 118.6183         | 2.481743         | 192.0312        | 27.78024        | 462.4 ± 23.3     | 16.19          | 5.06           | 0.696 ± 0.006 |
| 15D10313            | 3.0 %   | 0.3039998       | 79.7355          | 1.263055         | 119.5891        | 19.54442        | 522.3 ± 30.6     | 17.85          | 3.15           | 0.645 ± 0.006 |
| 15D10314            | 3.3 %   | 0.3688552       | 127.7322         | 1.205307         | 171.3287        | 26.39288        | 492.4 ± 22.2     | 19.47          | 4.51           | 0.577 ± 0.005 |
| 15D10315            | 3.6 %   | 0.1838821       | 55.1477          | 0.487867         | 73.3541         | 11.28203        | 491.6 ± 38.3     | 17.17          | 1.93           | 0.572 ± 0.007 |
| 15D10317            | 3.9 % ✓ | 0.2353922       | 80.1794          | 0.540741         | 102.2847        | 14.36756        | 449.0 ± 31.1     | 17.10          | 2.69           | 0.549 ± 0.005 |
| 15D10318            | 4.3 % ✓ | 0.5400611       | 270.4737         | 1.291112         | 351.4663        | 48.92210        | 444.9 ± 14.3     | 23.42          | 9.26           | 0.559 ± 0.004 |
| 15D10319            | 4.6 % ✓ | 0.4875543       | 202.2033         | 0.794639         | 278.1208        | 36.76014        | 422.5 ± 16.1     | 20.30          | 7.33           | 0.591 ± 0.004 |
| 15D10320            | 4.9 % ✓ | 0.5232404       | 190.9134         | 0.699217         | 279.4695        | 36.87887        | 421.8 ± 18.0     | 19.23          | 7.36           | 0.629 ± 0.005 |
| 15D10322            | 5.2 % ✓ | 0.5253049       | 165.8290         | 0.625453         | 253.7296        | 35.43125        | 446.3 ± 18.4     | 18.56          | 6.68           | 0.658 ± 0.005 |
| 15D10323            | 5.5 % ✓ | 0.4403449       | 117.8970         | 0.392737         | 185.7533        | 25.10437        | 432.0 ± 23.0     | 16.15          | 4.89           | 0.677 ± 0.005 |
| 15D10324            | 5.8 % ✓ | 0.2391383       | 48.3268          | 0.171560         | 78.3854         | 11.10855        | 453.0 ± 37.9     | 13.57          | 2.06           | 0.697 ± 0.009 |
| 15D10326            | 6.1 %   | 0.2246446       | 39.7234          | 0.136758         | 65.2746         | 8.00304         | 391.9 ± 43.2     | 10.75          | 1.72           | 0.707 ± 0.010 |
| 15D10327            | 6.5 %   | 0.3715521       | 83.9674          | 0.357107         | 139.4599        | 17.55588        | 402.4 ± 27.8     | 13.77          | 3.67           | 0.714 ± 0.007 |
| 15D10328            | 7.0 %   | 0.3597191       | 79.4712          | 0.326252         | 131.5059        | 16.71586        | 406.3 ± 28.0     | 13.57          | 3.46           | 0.712 ± 0.007 |
| 15D10330            | 7.6 %   | 0.3412333       | 64.3452          | 0.305361         | 109.9571        | 15.88744        | 461.8 ± 34.3     | 13.60          | 2.90           | 0.735 ± 0.008 |
| 15D10331            | 8.4 %   | 0.3708974       | 78.5899          | 0.436176         | 133.9259        | 17.44564        | 416.4 ± 28.3     | 13.72          | 3.53           | 0.733 ± 0.007 |
| 15D10332            | 9.4 %   | 0.4064183       | 90.9726          | 0.525094         | 150.9075        | 19.32143        | 409.2 ± 27.8     | 13.84          | 3.97           | 0.713 ± 0.006 |
| 15D10334            | 10.5 %  | 0.3067070       | 63.6017          | 0.371280         | 95.3993         | 11.34981        | 380.3 ± 36.7     | 11.12          | 2.51           | 0.645 ± 0.007 |
| 15D10335            | 11.7 %  | 0.2208387       | 64.4052          | 0.363373         | 77.7280         | 7.76624         | 319.4 ± 37.9     | 10.62          | 2.05           | 0.519 ± 0.005 |
| 15D10336            | 13.1 %  | 0.1541483       | 51.4564          | 0.210574         | 47.4307         | 4.80643         | 323.9 ± 54.0     | 9.54           | 1.25           | 0.396 ± 0.005 |
| 15D10338            | 14.7 %  | 0.1142782       | 58.8142          | 0.175045         | 34.0720         | 4.12973         | 387.4 ± 69.9     | 10.89          | 0.90           | 0.249 ± 0.003 |
| 15D10339            | 16.5 %  | 0.0836439       | 48.4893          | 0.069346         | 16.3845         | 1.75947         | 343.2 ± 135.0    | 6.64           | 0.43           | 0.145 ± 0.002 |
| 15D10340            | 18.5 %  | 0.0946614       | 117.5900         | 0.145858         | 19.4131         | 2.40554         | 396.1 ± 128.0    | 7.91           | 0.51           | 0.071 ± 0.001 |
| 15D10342            | 19.8 %  | 0.0696605       | 85.8516          | 0.165421         | 11.3967         | 1.66713         | 467.5 ± 184.4    | 7.49           | 0.30           | 0.057 ± 0.001 |
| 15D10343            | 21.7 %  | 0.0582320       | 75.0130          | 0.074695         | 9.1101          | 1.23154         | 432.1 ± 224.4    | 6.68           | 0.24           | 0.052 ± 0.001 |
| 15D10344            | 22.8 %  | 0.0523333       | 58.8462          | 0.046280         | 7.6558          | 0.96068         | 401.1 ± 265.8    | 5.85           | 0.20           | 0.056 ± 0.001 |
| 15D10346            | 24.3 %  | 0.0478003       | 54.2631          | 0.110440         | 7.8280          | 1.11106         | 453.7 ± 251.9    | 7.29           | 0.21           | 0.062 ± 0.001 |
| Σ                   |         | 9.7976917       | 2847.7621        | 29.649979        | 3796.5446       | 530.37944       |                  |                |                |               |

| Information on Analysis                                                                                                                                                                                                                                                         | Results          | 40(r)/39(k) ± 2σ          | Age ± 2σ<br>(ka)                                                            | MSWD                          | 39Ar(k)<br>(%,n)                                         | K/Ca ± 2σ     |
|---------------------------------------------------------------------------------------------------------------------------------------------------------------------------------------------------------------------------------------------------------------------------------|------------------|---------------------------|-----------------------------------------------------------------------------|-------------------------------|----------------------------------------------------------|---------------|
| Sample = 1180043-1A<br>Material = Groundmass<br>Location = Kerguelen Plateau<br>Analyst = Dan Miggins<br>Project = KERGUELEN   FALLOON (14-I<br>Mass Discrimination Law = LIN<br>Irradiation = 14-OSU-07 (7B24-14)<br>J = 0.00176774 ± 0.00000203<br>FCT-NM = 28.201 ± 0.023 Ma | Age Plateau      | 0.13633 ± 0.00294 ± 2.16% | 435.8 ± 9.4 ± 2.17%<br>Full External Error ± 13.6<br>Analytical Error ± 9.4 | 1.62<br>14%<br>2.15<br>1.2733 | 40.28<br>7<br>2σ Confidence Limit<br>Error Magnification | 0.609 ± 0.040 |
|                                                                                                                                                                                                                                                                                 | Total Fusion Age | 0.13970 ± 0.00170 ± 1.22% | 446.5 ± 5.5 ± 1.24%<br>Full External Error ± 11.5<br>Analytical Error ± 5.4 |                               | 31                                                       | 0.573 ± 0.001 |



| Normal Isochron |         | 39(k)/36(a) ± 2σ |  | 40(a+r)/36(a) ± 2σ | r.i.   |
|-----------------|---------|------------------|--|--------------------|--------|
| 15D10306        | 2.0 %   | 271.57 ± 2.33    |  | 338.10 ± 2.87      | 0.9832 |
| 15D10308        | 2.2 %   | 291.31 ± 2.58    |  | 341.97 ± 3.00      | 0.9837 |
| 15D10309        | 2.4 %   | 285.10 ± 3.53    |  | 343.89 ± 4.24      | 0.9843 |
| 15D10310        | 2.6 %   | 349.33 ± 3.28    |  | 351.28 ± 3.27      | 0.9854 |
| 15D10312        | 2.8 %   | 395.06 ± 3.87    |  | 352.65 ± 3.43      | 0.9855 |
| 15D10313        | 3.0 %   | 393.39 ± 5.01    |  | 359.79 ± 4.57      | 0.9870 |
| 15D10314        | 3.3 %   | 464.49 ± 5.08    |  | 367.05 ± 4.00      | 0.9865 |
| 15D10315        | 3.6 %   | 398.92 ± 6.41    |  | 356.85 ± 5.75      | 0.9847 |
| 15D10317        | 3.9 % ✓ | 434.53 ± 6.19    |  | 356.54 ± 5.08      | 0.9868 |
| 15D10318        | 4.3 % ✓ | 650.79 ± 6.46    |  | 386.09 ± 3.80      | 0.9884 |
| 15D10319        | 4.6 % ✓ | 570.44 ± 5.57    |  | 370.90 ± 3.60      | 0.9869 |
| 15D10320        | 4.9 % ✓ | 534.11 ± 5.47    |  | 365.98 ± 3.73      | 0.9883 |
| 15D10322        | 5.2 % ✓ | 483.01 ± 4.56    |  | 362.95 ± 3.40      | 0.9858 |
| 15D10323        | 5.5 % ✓ | 421.84 ± 4.35    |  | 352.51 ± 3.61      | 0.9863 |
| 15D10324        | 5.8 % ✓ | 327.78 ± 4.30    |  | 341.95 ± 4.49      | 0.9823 |
| 15D10326        | 6.1 %   | 290.57 ± 3.85    |  | 331.13 ± 4.39      | 0.9791 |
| 15D10327        | 6.5 %   | 375.34 ± 4.15    |  | 342.75 ± 3.78      | 0.9851 |
| 15D10328        | 7.0 %   | 365.58 ± 3.96    |  | 341.97 ± 3.69      | 0.9845 |
| 15D10330        | 7.6 %   | 322.23 ± 3.77    |  | 342.06 ± 3.99      | 0.9850 |
| 15D10331        | 8.4 %   | 361.09 ± 3.92    |  | 342.54 ± 3.70      | 0.9846 |
| 15D10332        | 9.4 %   | 371.31 ± 4.07    |  | 343.04 ± 3.74      | 0.9864 |
| 15D10334        | 10.5 %  | 311.04 ± 3.76    |  | 332.51 ± 4.02      | 0.9836 |
| 15D10335        | 11.7 %  | 351.97 ± 4.95    |  | 330.67 ± 4.66      | 0.9816 |
| 15D10336        | 13.1 %  | 307.70 ± 5.37    |  | 326.68 ± 5.73      | 0.9774 |
| 15D10338        | 14.7 %  | 298.15 ± 6.52    |  | 331.64 ± 7.29      | 0.9768 |
| 15D10339        | 16.5 %  | 195.88 ± 5.48    |  | 316.54 ± 8.84      | 0.9623 |
| 15D10340        | 18.5 %  | 205.08 ± 5.69    |  | 320.91 ± 8.89      | 0.9716 |
| 15D10342        | 19.8 %  | 163.60 ± 5.28    |  | 319.43 ± 10.17     | 0.9503 |
| 15D10343        | 21.7 %  | 156.44 ± 5.88    |  | 316.65 ± 11.73     | 0.9464 |
| 15D10344        | 22.8 %  | 146.29 ± 6.12    |  | 313.86 ± 12.89     | 0.9391 |
| 15D10346        | 24.3 %  | 163.77 ± 7.20    |  | 318.74 ± 13.87     | 0.9453 |

| Results         | 40(a)/36(a) ± 2σ      |        | 40(r)/39(k) ± 2σ           | Age ± 2σ (ka)         | MSWD |
|-----------------|-----------------------|--------|----------------------------|-----------------------|------|
| Normal Isochron | 297.75 ± 8.95 ± 3.01% |        | 0.13197 ± 0.01739 ± 13.18% | 421.8 ± 55.6 ± 13.18% | 1.86 |
|                 |                       |        | Full External Error ± 56.4 |                       |      |
|                 |                       |        | Analytical Error ± 55.6    |                       |      |
|                 |                       |        |                            |                       |      |
| Statistics      | 2σ Confidence Limit   | 2.26   | Convergence                | 0.000000352477        |      |
|                 | Error Magnification   | 1.3626 | Number of Iterations       | 6                     |      |
|                 | Number of Data Points | 7      | Calculated Line            | Weighted York-2       |      |



| Inverse Isochron |        | 39(k)/40(a+r) ± 2σ    |                       | 36(a)/40(a+r) ± 2σ      | r.i.   |
|------------------|--------|-----------------------|-----------------------|-------------------------|--------|
| 15D10306         | 2.0 %  | 0.8032062 ± 0.0012575 |                       | 0.00295768 ± 0.00002507 | 0.0336 |
| 15D10308         | 2.2 %  | 0.8518404 ± 0.0013565 |                       | 0.00292420 ± 0.00002566 | 0.0364 |
| 15D10309         | 2.4 %  | 0.8290287 ± 0.0018141 |                       | 0.00290788 ± 0.00003585 | 0.0694 |
| 15D10310         | 2.6 %  | 0.9944525 ± 0.0015903 |                       | 0.00284674 ± 0.00002651 | 0.0395 |
| 15D10312         | 2.8 %  | 1.1202494 ± 0.0018634 |                       | 0.00283566 ± 0.00002761 | 0.0481 |
| 15D10313         | 3.0 %  | 1.0933722 ± 0.0022457 |                       | 0.00277939 ± 0.00003531 | 0.0691 |
| 15D10314         | 3.3 %  | 1.2654498 ± 0.0022712 |                       | 0.00272440 ± 0.00002972 | 0.0602 |
| 15D10315         | 3.6 %  | 1.1178760 ± 0.0031466 |                       | 0.00280226 ± 0.00004519 | 0.1034 |
| 15D10317         | 3.9 %  | ✓                     | 1.2187499 ± 0.0028246 | 0.00280476 ± 0.00003996 | 0.0873 |
| 15D10318         | 4.3 %  | ✓                     | 1.6856073 ± 0.0025423 | 0.00259009 ± 0.00002552 | 0.0333 |
| 15D10319         | 4.6 %  | ✓                     | 1.5380029 ± 0.0024268 | 0.00269617 ± 0.00002617 | 0.0439 |
| 15D10320         | 4.9 %  | ✓                     | 1.4593980 ± 0.0022868 | 0.00273238 ± 0.00002783 | 0.0379 |
| 15D10322         | 5.2 %  | ✓                     | 1.3308043 ± 0.0021101 | 0.00275521 ± 0.00002585 | 0.0431 |
| 15D10323         | 5.5 %  | ✓                     | 1.1966615 ± 0.0020395 | 0.00283679 ± 0.00002907 | 0.0522 |
| 15D10324         | 5.8 %  | ✓                     | 0.9585626 ± 0.0023696 | 0.00292438 ± 0.00003837 | 0.0928 |
| 15D10326         | 6.1 %  | 0.8775178 ± 0.0023799 |                       | 0.00302000 ± 0.00004003 | 0.1041 |
| 15D10327         | 6.5 %  | 1.0950955 ± 0.0020876 |                       | 0.00291758 ± 0.00003217 | 0.0677 |
| 15D10328         | 7.0 %  | 1.0690419 ± 0.0020364 |                       | 0.00292424 ± 0.00003159 | 0.0669 |
| 15D10330         | 7.6 %  | 0.9420436 ± 0.0019069 |                       | 0.00292347 ± 0.00003411 | 0.0709 |
| 15D10331         | 8.4 %  | 1.0541539 ± 0.0020032 |                       | 0.00291940 ± 0.00003156 | 0.0673 |
| 15D10332         | 9.4 %  | 1.0824097 ± 0.0019538 |                       | 0.00291511 ± 0.00003180 | 0.0558 |
| 15D10334         | 10.5 % | 0.9354551 ± 0.0020475 |                       | 0.00300747 ± 0.00003632 | 0.0798 |
| 15D10335         | 11.7 % | 1.0644158 ± 0.0028753 |                       | 0.00302419 ± 0.00004259 | 0.1075 |
| 15D10336         | 13.1 % | 0.9418846 ± 0.0034992 |                       | 0.00306109 ± 0.00005365 | 0.1265 |
| 15D10338         | 14.7 % | 0.8990217 ± 0.0042445 |                       | 0.00301534 ± 0.00006629 | 0.1298 |
| 15D10339         | 16.5 % | 0.6188397 ± 0.0047459 |                       | 0.00315921 ± 0.00008819 | 0.1298 |
| 15D10340         | 18.5 % | 0.6390501 ± 0.0042192 |                       | 0.00311612 ± 0.00008636 | 0.1177 |
| 15D10342         | 19.8 % | 0.5121687 ± 0.0051771 |                       | 0.00313055 ± 0.00009969 | 0.1176 |
| 15D10343         | 21.7 % | 0.4940617 ± 0.0060414 |                       | 0.00315807 ± 0.00011702 | 0.1235 |
| 15D10344         | 22.8 % | 0.4661023 ± 0.0067485 |                       | 0.00318616 ± 0.00013081 | 0.1234 |
| 15D10346         | 24.3 % | 0.5137839 ± 0.0074367 |                       | 0.00313732 ± 0.00013653 | 0.1345 |

| Results          | 40(a)/36(a) ± 2σ           |        | 40(r)/39(k) ± 2σ              | Age ± 2σ<br>(ka)         | MSWD |
|------------------|----------------------------|--------|-------------------------------|--------------------------|------|
| Inverse Isochron | 297.69 ± 8.92<br>± 3.00%   |        | 0.13216 ± 0.01706<br>± 12.91% | 422.4 ± 54.5<br>± 12.91% | 1.85 |
|                  | Full External Error ± 55.4 |        |                               |                          | 10%  |
|                  | Analytical Error ± 54.5    |        |                               |                          |      |
| Statistics       | 2σ Confidence Limit        | 2.26   | Convergence                   | 0.0202709352             |      |
|                  | Error Magnification        | 1.3619 | Number of Iterations          | 2                        |      |
|                  | Number of Data Points      | 7      | Calculated Line               | Weighted York-2          |      |
|                  | Spreading Factor           | 9.6%   |                               |                          |      |



| OSU Argon Geochronology Lab |        |           |       |           |       |           |        |           |       |           |       |                   |               |             |             |               |
|-----------------------------|--------|-----------|-------|-----------|-------|-----------|--------|-----------|-------|-----------|-------|-------------------|---------------|-------------|-------------|---------------|
| Relative Abundances         |        | 36Ar [fA] | %1σ   | 37Ar [fA] | %1σ   | 38Ar [fA] | %1σ    | 39Ar [fA] | %1σ   | 40Ar [fA] | %1σ   | 40(r)/39(k) ± 2σ  | Age ± 2σ (ka) | 40Ar(r) (%) | 39Ar(k) (%) | K/Ca ± 2σ     |
| 15D10306                    | 2.0 %  | 0.715182  | 0.412 | 65.1926   | 0.533 | 7.831840  | 0.531  | 189.3633  | 0.071 | 235.8958  | 0.033 | 0.15688 ± 0.00924 | 501.4 ± 29.5  | 12.59       | 4.99        | 1.249 ± 0.013 |
| 15D10308                    | 2.2 %  | 0.647643  | 0.424 | 72.3728   | 0.489 | 6.868740  | 0.594  | 182.9418  | 0.071 | 214.8881  | 0.036 | 0.15954 ± 0.00891 | 509.9 ± 28.5  | 13.58       | 4.82        | 1.087 ± 0.011 |
| 15D10309                    | 2.4 %  | 0.317742  | 0.593 | 35.6235   | 0.786 | 3.225378  | 1.208  | 87.8371   | 0.085 | 106.0116  | 0.068 | 0.16974 ± 0.01281 | 542.5 ± 40.9  | 14.06       | 2.31        | 1.060 ± 0.017 |
| 15D10310                    | 2.6 %  | 0.581566  | 0.442 | 102.1165  | 0.420 | 5.801896  | 0.691  | 193.6260  | 0.070 | 194.8325  | 0.038 | 0.15967 ± 0.00789 | 510.3 ± 25.2  | 15.86       | 5.10        | 0.815 ± 0.007 |
| 15D10312                    | 2.8 %  | 0.517773  | 0.455 | 118.6183  | 0.393 | 4.759556  | 0.817  | 192.1110  | 0.070 | 171.6122  | 0.044 | 0.14467 ± 0.00730 | 462.4 ± 23.3  | 16.19       | 5.06        | 0.696 ± 0.006 |
| 15D10313                    | 3.0 %  | 0.325240  | 0.590 | 79.7355   | 0.469 | 2.681904  | 1.448  | 119.6427  | 0.078 | 109.4972  | 0.067 | 0.16343 ± 0.00957 | 522.3 ± 30.6  | 17.85       | 3.15        | 0.645 ± 0.006 |
| 15D10314                    | 3.3 %  | 0.402758  | 0.496 | 127.7322  | 0.389 | 3.225743  | 1.244  | 171.4147  | 0.071 | 135.5626  | 0.054 | 0.15405 ± 0.00696 | 492.4 ± 22.2  | 19.47       | 4.51        | 0.577 ± 0.005 |
| 15D10315                    | 3.6 %  | 0.198514  | 0.739 | 55.1477   | 0.571 | 1.357771  | 2.848  | 73.3912   | 0.090 | 65.6933   | 0.108 | 0.15380 ± 0.01200 | 491.6 ± 38.3  | 17.17       | 1.93        | 0.572 ± 0.007 |
| 15D10317                    | 3.9 %  | ✓0.256641 | 0.648 | 80.1794   | 0.462 | 1.749850  | 2.292  | 102.3387  | 0.079 | 84.0293   | 0.085 | 0.14047 ± 0.00972 | 449.0 ± 31.1  | 17.10       | 2.69        | 0.549 ± 0.005 |
| 15D10318                    | 4.3 %  | ✓0.611660 | 0.432 | 270.4737  | 0.342 | 5.395495  | 0.761  | 351.6483  | 0.067 | 208.8652  | 0.035 | 0.13919 ± 0.00449 | 444.9 ± 14.3  | 23.42       | 9.26        | 0.559 ± 0.004 |
| 15D10319                    | 4.6 %  | ✓0.541056 | 0.434 | 202.2033  | 0.353 | 4.053588  | 0.971  | 278.2569  | 0.067 | 181.1133  | 0.041 | 0.13217 ± 0.00504 | 422.5 ± 16.1  | 20.30       | 7.33        | 0.591 ± 0.004 |
| 15D10320                    | 4.9 %  | ✓0.573747 | 0.462 | 190.9134  | 0.356 | 3.980026  | 1.020  | 279.5980  | 0.068 | 191.7787  | 0.039 | 0.13196 ± 0.00565 | 421.8 ± 18.0  | 19.23       | 7.36        | 0.629 ± 0.005 |
| 15D10322                    | 5.2 %  | ✓0.569178 | 0.430 | 165.8290  | 0.365 | 3.613380  | 1.077  | 253.8412  | 0.068 | 190.9151  | 0.040 | 0.13964 ± 0.00575 | 446.3 ± 18.4  | 18.56       | 6.68        | 0.658 ± 0.005 |
| 15D10323                    | 5.5 %  | ✓0.471529 | 0.476 | 117.8970  | 0.394 | 2.590549  | 1.498  | 185.8327  | 0.071 | 155.4139  | 0.048 | 0.13515 ± 0.00720 | 432.0 ± 23.0  | 16.15       | 4.89        | 0.677 ± 0.005 |
| 15D10324                    | 5.8 %  | ✓0.251922 | 0.616 | 48.3268   | 0.633 | 1.108953  | 3.370  | 78.4180   | 0.088 | 81.8531   | 0.087 | 0.14172 ± 0.01187 | 453.0 ± 37.9  | 13.57       | 2.06        | 0.697 ± 0.009 |
| 15D10326                    | 6.1 %  | 0.235152  | 0.625 | 39.7234   | 0.729 | 0.922121  | 4.270  | 65.3013   | 0.095 | 74.4514   | 0.097 | 0.12261 ± 0.01352 | 391.9 ± 43.2  | 10.75       | 1.72        | 0.707 ± 0.010 |
| 15D10327                    | 6.5 %  | 0.393773  | 0.516 | 83.9674   | 0.452 | 2.014771  | 1.949  | 139.5164  | 0.074 | 127.4904  | 0.060 | 0.12588 ± 0.00870 | 402.4 ± 27.8  | 13.77       | 3.67        | 0.714 ± 0.007 |
| 15D10328                    | 7.0 %  | 0.380749  | 0.507 | 79.4712   | 0.455 | 1.891126  | 2.081  | 131.5594  | 0.075 | 123.1457  | 0.059 | 0.12711 ± 0.00875 | 406.3 ± 28.0  | 13.57       | 3.46        | 0.712 ± 0.007 |
| 15D10330                    | 7.6 %  | 0.358266  | 0.552 | 64.3452   | 0.516 | 1.621343  | 2.403  | 110.0004  | 0.078 | 116.8329  | 0.065 | 0.14449 ± 0.01072 | 461.8 ± 34.3  | 13.60       | 2.90        | 0.735 ± 0.008 |
| 15D10331                    | 8.4 %  | 0.391711  | 0.508 | 78.5899   | 0.468 | 2.030665  | 1.928  | 133.9788  | 0.075 | 127.1811  | 0.059 | 0.13026 ± 0.00887 | 416.4 ± 28.3  | 13.72       | 3.53        | 0.733 ± 0.007 |
| 15D10332                    | 9.4 %  | 0.430514  | 0.512 | 90.9726   | 0.438 | 2.319644  | 1.744  | 150.9687  | 0.073 | 139.5705  | 0.052 | 0.12803 ± 0.00870 | 409.2 ± 27.8  | 13.84       | 3.97        | 0.713 ± 0.006 |
| 15D10334                    | 10.5 % | 0.323554  | 0.568 | 63.6017   | 0.538 | 1.515131  | 2.537  | 95.4421   | 0.082 | 102.0781  | 0.073 | 0.11897 ± 0.01150 | 380.3 ± 36.7  | 11.12       | 2.51        | 0.645 ± 0.007 |
| 15D10335                    | 11.7 % | 0.237896  | 0.646 | 64.4052   | 0.507 | 1.290087  | 3.062  | 77.7713   | 0.089 | 73.1026   | 0.101 | 0.09992 ± 0.01186 | 319.4 ± 37.9  | 10.62       | 2.05        | 0.519 ± 0.005 |
| 15D10336                    | 13.1 % | 0.167764  | 0.793 | 51.4564   | 0.604 | 0.779861  | 5.061  | 47.4653   | 0.118 | 50.4051   | 0.143 | 0.10134 ± 0.01688 | 323.9 ± 54.0  | 9.54        | 1.25        | 0.396 ± 0.005 |
| 15D10338                    | 14.7 % | 0.129832  | 0.952 | 58.8142   | 0.539 | 0.584960  | 6.550  | 34.1115   | 0.148 | 37.9333   | 0.183 | 0.12121 ± 0.02187 | 387.4 ± 69.9  | 10.89       | 0.90        | 0.249 ± 0.003 |
| 15D10339                    | 16.5 % | 0.096456  | 1.185 | 48.4893   | 0.657 | 0.272109  | 15.271 | 16.4172   | 0.278 | 26.4928   | 0.263 | 0.10739 ± 0.04222 | 343.2 ± 135.0 | 6.64        | 0.43        | 0.145 ± 0.002 |
| 15D10340                    | 18.5 % | 0.125727  | 1.024 | 117.5900  | 0.400 | 0.386105  | 10.667 | 19.4922   | 0.234 | 30.3976   | 0.232 | 0.12391 ± 0.04004 | 396.1 ± 128.0 | 7.91        | 0.51        | 0.071 ± 0.001 |
| 15D10342                    | 19.8 % | 0.092350  | 1.173 | 85.8516   | 0.455 | 0.309328  | 12.858 | 11.4545   | 0.399 | 22.2633   | 0.307 | 0.14628 ± 0.05771 | 467.5 ± 184.4 | 7.49        | 0.30        | 0.057 ± 0.001 |
| 15D10343                    | 21.7 % | 0.078047  | 1.348 | 75.0130   | 0.477 | 0.190294  | 20.350 | 9.1605    | 0.481 | 18.4483   | 0.374 | 0.13518 ± 0.07021 | 432.1 ± 224.4 | 6.68        | 0.24        | 0.052 ± 0.001 |
| 15D10344                    | 22.8 % | 0.067876  | 1.542 | 58.8462   | 0.564 | 0.144002  | 27.676 | 7.6954    | 0.581 | 16.4329   | 0.428 | 0.12548 ± 0.08317 | 401.1 ± 265.8 | 5.85        | 0.20        | 0.056 ± 0.001 |
| 15D10346                    | 24.3 % | 0.062142  | 1.630 | 54.2631   | 0.578 | 0.209211  | 18.027 | 7.8646    | 0.556 | 15.2440   | 0.460 | 0.14193 ± 0.07882 | 453.7 ± 251.9 | 7.29        | 0.21        | 0.062 ± 0.001 |
| Σ                           |        | 10.553960 | 0.102 | 2847.7621 | 0.085 | 74.725428 | 0.295  | 3798.4611 | 0.016 | 3429.4318 | 0.012 |                   |               |             |             |               |

| Information on Analysis and Constants Used in Calculations |                                                                 | Results               |                            |                            |              |                           |               |
|------------------------------------------------------------|-----------------------------------------------------------------|-----------------------|----------------------------|----------------------------|--------------|---------------------------|---------------|
|                                                            |                                                                 | 40(a)/36(a) ± 2σ      | 40(r)/39(k) ± 2σ           | Age ± 2σ (ka)              | MSWD         | 39Ar(k) (% <sub>n</sub> ) | K/Ca ± 2σ     |
| Sample = 1180043-1A                                        | Age Equations = Min et al. (2000)                               |                       |                            |                            |              |                           |               |
| Material = Groundmass                                      | Negative Intensities = Allowed                                  |                       | 0.13633 ± 0.00294 ± 2.16%  | 435.8 ± 9.4 ± 2.17%        | 1.62 14%     | 40.28 7                   | 0.609 ± 0.040 |
| Location = Kerguelen Plateau                               | Decay Constant 40K = 5.530 ± 0.048 E-10 1/a                     |                       |                            | Full External Error ± 13.6 | 2.15         | 2σ Confidence Limit       |               |
| Analyst = Dan Miggins                                      | Decay Constant 39Ar = 2.940 ± 0.016 E-07 1/h                    |                       |                            | Analytical Error ± 9.4     | 1.2733       | Error Magnification       |               |
| Project = KERGUELEN   FALLOON (14-PIL-01)                  | Decay Constant 37Ar = 8.230 ± 0.012 E-04 1/h                    |                       |                            |                            |              |                           |               |
| Mass Discrimination Law = LIN                              | Decay Constant 36Cl = 2.257 ± 0.015 E-06 1/a                    |                       |                            |                            |              |                           |               |
| Irradiation = 14-OSU-07 (7B24-14)                          | Decay Constant 40K(EC,β <sup>+</sup> ) = 0.580 ± 0.009 E-10 1/a |                       | 0.13970 ± 0.00170 ± 1.22%  | 446.5 ± 5.5 ± 1.24%        |              | 31                        | 0.573 ± 0.001 |
| J = 0.00176774 ± 0.00000203                                | Decay Constant 40K(β <sup>-</sup> ) = 4.950 ± 0.043 E-10 1/a    |                       |                            | Full External Error ± 11.5 |              |                           |               |
| FCT-NM = 28.201 ± 0.023 Ma                                 | Atmospheric Ratio 40/36(a) = 295.50                             |                       |                            | Analytical Error ± 5.4     |              |                           |               |
| IGSN = Undefined                                           | Atmospheric Ratio 38/36(a) = 0.1869                             |                       |                            |                            |              |                           |               |
| Preferred Age = Undefined                                  | Production Ratio 39/37(ca) = 0.000673                           | 297.75 ± 8.95 ± 3.01% | 0.13197 ± 0.01739 ± 13.18% | 421.8 ± 55.6 ± 13.18%      | 1.86 10%     | 40.28 7                   |               |
| Classification = Undefined                                 | Production Ratio 38/37(ca) = 0.000014                           |                       |                            | Full External Error ± 56.4 | 2.26         | 2σ Confidence Limit       |               |
| Experiment Type = Incremental Heating                      | Production Ratio 36/37(ca) = 0.000264                           |                       |                            | Analytical Error ± 55.6    | 1.3626       | Error Magnification       |               |
| Extraction Method = Undefined                              | Production Ratio 40/39(k) = 0.001010                            |                       |                            |                            | 6            | Number of Iterations      |               |
| Heating = 77 sec                                           | Production Ratio 38/39(k) = 0.011380                            |                       |                            |                            | 0.0000003525 | Convergence               |               |
| Isolation = 6.00 min                                       | Production Ratio 36/38(cl) = 262.80 ± 1.71                      |                       |                            |                            |              |                           |               |
| Instrument = ARGUS-VI-D                                    | Scaling Ratio K/Ca = 0.430                                      |                       |                            |                            |              |                           |               |
| Lithology = Undefined                                      | Abundance Ratio 40K/K = 1.1700 ± 0.0100 E-04                    | 297.69 ± 8.92 ± 3.00% | 0.13216 ± 0.01706 ± 12.91% | 422.4 ± 54.5 ± 12.91%      | 1.85 10%     | 40.28 7                   |               |
| Lat-Lon = Undefined - Undefined                            | Atomic Weight K = 39.0983 ± 0.0001 g                            |                       |                            | Full External Error ± 55.4 | 2.26         | 2σ Confidence Limit       |               |
| Collector Calibrations = 40Ar 36Ar                         |                                                                 |                       |                            |                            |              |                           |               |

15D10305.full.xls printed at 06-07-2015 (15:33)

ArArCALC v2.6.2 -- Beta Version



| OSU Argon Geochronology Lab |        |                 |      |                 |      |                  |      |                  |       |                  |      |                 |      |                 |      |                 |      |                  |      |                  |       |                 |      |                  |      |                 |      |                 |      |                 |      |                 |      |
|-----------------------------|--------|-----------------|------|-----------------|------|------------------|------|------------------|-------|------------------|------|-----------------|------|-----------------|------|-----------------|------|------------------|------|------------------|-------|-----------------|------|------------------|------|-----------------|------|-----------------|------|-----------------|------|-----------------|------|
| Degassing<br>Patterns       |        | 36Ar(a)<br>[fA] |      | 36Ar(c)<br>[fA] |      | 36Ar(ca)<br>[fA] |      | 36Ar(cl)<br>[fA] |       | 37Ar(ca)<br>[fA] |      | 38Ar(a)<br>[fA] |      | 38Ar(c)<br>[fA] |      | 38Ar(k)<br>[fA] |      | 38Ar(ca)<br>[fA] |      | 38Ar(cl)<br>[fA] |       | 39Ar(k)<br>[fA] |      | 39Ar(ca)<br>[fA] |      | 40Ar(r)<br>[fA] |      | 40Ar(a)<br>[fA] |      | 40Ar(c)<br>[fA] |      | 40Ar(k)<br>[fA] |      |
|                             |        | %1σ             |      | %1σ             |      | %1σ              |      | %1σ              |       | %1σ              |      | %1σ             |      | %1σ             |      | %1σ             |      | %1σ              |      | %1σ              |       | %1σ             |      | %1σ              |      | %1σ             |      | %1σ             |      | %1σ             |      | %1σ             |      |
| 15D10306                    | 2.0 %  | 0.6971382       | 0.42 | 0.0000000       | 0.00 | 0.0172109        | 0.53 | 0.0008335        | 1.19  | 65.1926          | 0.53 | 0.1302951       | 0.42 | 0.0000000       | 0.00 | 2.154455        | 0.07 | 0.0009062        | 0.53 | 5.546184         | 1.50  | 189.3194        | 0.07 | 0.0438746        | 0.53 | 29.70029        | 2.94 | 206.0043        | 0.42 | 0.0000000       | 0.00 | 0.1912126       | 0.07 |
| 15D10308                    | 2.2 %  | 0.6278347       | 0.44 | 0.0000000       | 0.00 | 0.0191064        | 0.49 | 0.0007018        | 1.27  | 72.3728          | 0.49 | 0.1173423       | 0.44 | 0.0000000       | 0.00 | 2.081323        | 0.07 | 0.0010060        | 0.49 | 4.669068         | 1.57  | 182.8930        | 0.07 | 0.0487069        | 0.49 | 29.17826        | 2.79 | 185.5252        | 0.44 | 0.0000000       | 0.00 | 0.1847220       | 0.07 |
| 15D10309                    | 2.4 %  | 0.3080111       | 0.61 | 0.0000000       | 0.00 | 0.0094046        | 0.79 | 0.0003259        | 2.02  | 35.6235          | 0.79 | 0.0575673       | 0.61 | 0.0000000       | 0.00 | 0.999314        | 0.09 | 0.0004952        | 0.79 | 2.168002         | 2.22  | 87.8131         | 0.09 | 0.0239746        | 0.79 | 14.90563        | 3.77 | 91.0173         | 0.61 | 0.0000000       | 0.00 | 0.0886913       | 0.09 |
| 15D10310                    | 2.6 %  | 0.5540815       | 0.46 | 0.0000000       | 0.00 | 0.0269588        | 0.42 | 0.0005253        | 1.47  | 102.1165         | 0.42 | 0.1035578       | 0.46 | 0.0000000       | 0.00 | 2.202682        | 0.07 | 0.0014194        | 0.42 | 3.494237         | 1.74  | 193.5573        | 0.07 | 0.0687244        | 0.42 | 30.90593        | 2.47 | 163.7311        | 0.46 | 0.0000000       | 0.00 | 0.1954928       | 0.07 |
| 15D10312                    | 2.8 %  | 0.4860847       | 0.48 | 0.0000000       | 0.00 | 0.0313152        | 0.39 | 0.0003732        | 1.82  | 118.6183         | 0.39 | 0.0908492       | 0.48 | 0.0000000       | 0.00 | 2.185315        | 0.07 | 0.0016488        | 0.39 | 2.481743         | 2.04  | 192.0312        | 0.07 | 0.0798301        | 0.39 | 27.78024        | 2.52 | 143.6380        | 0.48 | 0.0000000       | 0.00 | 0.1939515       | 0.07 |
| 15D10313                    | 3.0 %  | 0.3039998       | 0.63 | 0.0000000       | 0.00 | 0.0210502        | 0.47 | 0.0001900        | 3.21  | 79.7355          | 0.47 | 0.0568176       | 0.63 | 0.0000000       | 0.00 | 1.360924        | 0.08 | 0.0011083        | 0.47 | 1.263055         | 3.34  | 119.5891        | 0.08 | 0.0536620        | 0.47 | 19.54442        | 2.93 | 89.8320         | 0.63 | 0.0000000       | 0.00 | 0.1207850       | 0.08 |
| 15D10314                    | 3.3 %  | 0.3688552       | 0.54 | 0.0000000       | 0.00 | 0.0337213        | 0.39 | 0.0001813        | 3.46  | 127.7322         | 0.39 | 0.0689390       | 0.54 | 0.0000000       | 0.00 | 1.949721        | 0.07 | 0.0017755        | 0.39 | 1.205307         | 3.58  | 171.3287        | 0.07 | 0.0859638        | 0.39 | 26.39288        | 2.26 | 108.9967        | 0.54 | 0.0000000       | 0.00 | 0.1730420       | 0.07 |
| 15D10315                    | 3.6 %  | 0.1838821       | 0.80 | 0.0000000       | 0.00 | 0.0145590        | 0.57 | 0.0000734        | 7.98  | 55.1477          | 0.57 | 0.0343676       | 0.80 | 0.0000000       | 0.00 | 0.834770        | 0.09 | 0.0007666        | 0.57 | 0.487867         | 8.03  | 73.3541         | 0.09 | 0.0371144        | 0.57 | 11.28203        | 3.90 | 54.3372         | 0.80 | 0.0000000       | 0.00 | 0.0740877       | 0.09 |
| 15D10317                    | 3.9 %  | ✓ 0.2353922     | 0.71 | 0.0000000       | 0.00 | 0.0211674        | 0.46 | 0.0000814        | 7.48  | 80.1794          | 0.46 | 0.0439948       | 0.71 | 0.0000000       | 0.00 | 1.164000        | 0.08 | 0.0011145        | 0.46 | 0.540741         | 7.53  | 102.2847        | 0.08 | 0.0539607        | 0.46 | 14.36756        | 3.46 | 69.5584         | 0.71 | 0.0000000       | 0.00 | 0.1033076       | 0.08 |
| 15D10318                    | 4.3 %  | ✓ 0.5400611     | 0.49 | 0.0000000       | 0.00 | 0.0714051        | 0.34 | 0.0001943        | 3.32  | 270.4737         | 0.34 | 0.1009374       | 0.49 | 0.0000000       | 0.00 | 3.999686        | 0.07 | 0.0037596        | 0.34 | 1.291112         | 3.44  | 351.4663        | 0.07 | 0.1820288        | 0.34 | 48.92210        | 1.61 | 159.5881        | 0.49 | 0.0000000       | 0.00 | 0.3549809       | 0.07 |
| 15D10319                    | 4.6 %  | ✓ 0.4875543     | 0.48 | 0.0000000       | 0.00 | 0.0533817        | 0.35 | 0.0001196        | 5.05  | 202.2033         | 0.35 | 0.0911239       | 0.48 | 0.0000000       | 0.00 | 3.165015        | 0.07 | 0.0028106        | 0.35 | 0.794639         | 5.13  | 278.1208        | 0.07 | 0.1360828        | 0.35 | 36.76014        | 1.91 | 144.0723        | 0.48 | 0.0000000       | 0.00 | 0.2809020       | 0.07 |
| 15D10320                    | 4.9 %  | ✓ 0.5232404     | 0.51 | 0.0000000       | 0.00 | 0.0504011        | 0.36 | 0.0001052        | 5.89  | 190.9134         | 0.36 | 0.0977936       | 0.51 | 0.0000000       | 0.00 | 3.180363        | 0.07 | 0.0026537        | 0.36 | 0.699217         | 5.96  | 279.4695        | 0.07 | 0.1284847        | 0.36 | 36.87887        | 2.14 | 154.6175        | 0.51 | 0.0000000       | 0.00 | 0.2822642       | 0.07 |
| 15D10322                    | 5.2 %  | ✓ 0.5253049     | 0.47 | 0.0000000       | 0.00 | 0.0437789        | 0.37 | 0.0000941        | 6.30  | 165.8290         | 0.37 | 0.0981795       | 0.47 | 0.0000000       | 0.00 | 2.887443        | 0.07 | 0.0023050        | 0.37 | 0.625453         | 6.37  | 253.7296        | 0.07 | 0.1116029        | 0.37 | 35.43125        | 2.06 | 155.2276        | 0.47 | 0.0000000       | 0.00 | 0.2562669       | 0.07 |
| 15D10323                    | 5.5 %  | ✓ 0.4403449     | 0.51 | 0.0000000       | 0.00 | 0.0311248        | 0.39 | 0.0000591        | 9.93  | 117.8970         | 0.39 | 0.0823005       | 0.51 | 0.0000000       | 0.00 | 2.113873        | 0.07 | 0.0016388        | 0.39 | 0.392737         | 9.97  | 185.7533        | 0.07 | 0.0793447        | 0.39 | 25.10437        | 2.66 | 130.1219        | 0.51 | 0.0000000       | 0.00 | 0.1876108       | 0.07 |
| 15D10324                    | 5.8 %  | ✓ 0.2391383     | 0.65 | 0.0000000       | 0.00 | 0.0127583        | 0.63 | 0.0000258        | 21.81 | 48.3268          | 0.63 | 0.0446950       | 0.65 | 0.0000000       | 0.00 | 0.892026        | 0.09 | 0.0006717        | 0.63 | 0.171560         | 21.83 | 78.3854         | 0.09 | 0.0325239        | 0.63 | 11.10855        | 4.19 | 70.6654         | 0.65 | 0.0000000       | 0.00 | 0.0791693       | 0.09 |
| 15D10326                    | 6.1 %  | 0.2246446       | 0.66 | 0.0000000       | 0.00 | 0.0104870        | 0.73 | 0.0000206        | 28.81 | 39.7234          | 0.73 | 0.0419861       | 0.66 | 0.0000000       | 0.00 | 0.742825        | 0.10 | 0.0005522        | 0.73 | 0.136758         | 28.83 | 65.2746         | 0.10 | 0.0267338        | 0.73 | 8.00304         | 5.51 | 66.3825         | 0.66 | 0.0000000       | 0.00 | 0.0659274       | 0.10 |
| 15D10327                    | 6.5 %  | 0.3715521       | 0.55 | 0.0000000       | 0.00 | 0.0221674        | 0.45 | 0.0000538        | 11.04 | 83.9674          | 0.45 | 0.0694431       | 0.55 | 0.0000000       | 0.00 | 1.587053        | 0.07 | 0.0011671        | 0.45 | 0.357107         | 11.08 | 139.4599        | 0.07 | 0.0565100        | 0.45 | 17.55588        | 3.45 | 109.7936        | 0.55 | 0.0000000       | 0.00 | 0.1408545       | 0.07 |
| 15D10328                    | 7.0 %  | 0.3597191       | 0.54 | 0.0000000       | 0.00 | 0.0209804        | 0.46 | 0.0000491        | 12.10 | 79.4712          | 0.46 | 0.0672315       | 0.54 | 0.0000000       | 0.00 | 1.496537        | 0.08 | 0.0011046        | 0.46 | 0.326252         | 12.14 | 131.5059        | 0.08 | 0.0534841        | 0.46 | 16.71586        | 3.44 | 106.2970        | 0.54 | 0.0000000       | 0.00 | 0.1328210       | 0.08 |
| 15D10330                    | 7.6 %  | 0.3412333       | 0.58 | 0.0000000       | 0.00 | 0.0169871        | 0.52 | 0.0000460        | 12.80 | 64.3452          | 0.52 | 0.0637765       | 0.58 | 0.0000000       | 0.00 | 1.251312        | 0.08 | 0.0008944        | 0.52 | 0.305361         | 12.83 | 109.9571        | 0.08 | 0.0433043        | 0.52 | 15.88744        | 3.71 | 100.8344        | 0.58 | 0.0000000       | 0.00 | 0.1110567       | 0.08 |
| 15D10331                    | 8.4 %  | 0.3708974       | 0.54 | 0.0000000       | 0.00 | 0.0207477        | 0.47 | 0.0000657        | 9.03  | 78.5899          | 0.47 | 0.0693207       | 0.54 | 0.0000000       | 0.00 | 1.524076        | 0.07 | 0.0010924        | 0.47 | 0.436176         | 9.07  | 133.9259        | 0.07 | 0.0528910        | 0.47 | 17.44564        | 3.40 | 109.6002        | 0.54 | 0.0000000       | 0.00 | 0.1352651       | 0.07 |
| 15D10332                    | 9.4 %  | 0.4064183       | 0.54 | 0.0000000       | 0.00 | 0.0240168        | 0.44 | 0.0000791        | 7.76  | 90.9726          | 0.44 | 0.0759596       | 0.54 | 0.0000000       | 0.00 | 1.717327        | 0.07 | 0.0012645        | 0.44 | 0.525094         | 7.82  | 150.9075        | 0.07 | 0.0612246        | 0.44 | 19.32143        | 3.40 | 120.0966        | 0.54 | 0.0000000       | 0.00 | 0.1524165       | 0.07 |
| 15D10334                    | 10.5 % | 0.3067070       | 0.60 | 0.0000000       | 0.00 | 0.0167909        | 0.54 | 0.0000559        | 10.40 | 63.6017          | 0.54 | 0.0573235       | 0.60 | 0.0000000       | 0.00 | 1.085644        | 0.08 | 0.0008841        | 0.54 | 0.371280         | 10.44 | 95.3993         | 0.08 | 0.0428040        | 0.54 | 11.34981        | 4.83 | 90.6319         | 0.60 | 0.0000000       | 0.00 | 0.0963533       | 0.08 |
| 15D10335                    | 11.7 % | 0.2208387       | 0.70 | 0.0000000       | 0.00 | 0.0170030        | 0.51 | 0.0000548        | 10.91 | 64.4052          | 0.51 | 0.0412748       | 0.70 | 0.0000000       | 0.00 | 0.884544        | 0.09 | 0.0008952        | 0.51 | 0.363373         | 10.95 | 77.7280         | 0.09 | 0.0433447        | 0.51 | 7.76624         | 5.93 | 65.2578         | 0.70 | 0.0000000       | 0.00 | 0.0785053       | 0.09 |
| 15D10336                    | 13.1 % | 0.1541483       | 0.86 | 0.0000000       | 0.00 | 0.0135845        | 0.60 | 0.0000317        | 18.77 | 51.4564          | 0.60 | 0.0288103       | 0.86 | 0.0000000       | 0.00 | 0.539761        | 0.12 | 0.0007152        | 0.60 | 0.210574         | 18.79 | 47.4307         | 0.12 | 0.0346301        | 0.60 | 4.80643         | 8.33 | 45.5508         | 0.86 | 0.0000000       | 0.00 | 0.0479050       | 0.12 |
| 15D10338                    | 14.7 % | 0.1142782       | 1.08 |                 |      |                  |      |                  |       |                  |      |                 |      |                 |      |                 |      |                  |      |                  |       |                 |      |                  |      |                 |      |                 |      |                 |      |                 |      |



| Additional Parameters |        | 40Ar/39Ar | 1σ       | 37Ar/39Ar | 1σ       | 36Ar/39Ar | 1σ       | Time (days) | 37Ar (decay) | 39Ar (decay) | 40Ar (moles) |
|-----------------------|--------|-----------|----------|-----------|----------|-----------|----------|-------------|--------------|--------------|--------------|
| 15D10306              | 2.0 %  | 1.245732  | 0.000975 | 0.344273  | 0.001852 | 0.003777  | 0.000016 | 92.540      | 6.235904     | 1.00065406   | 1.132E-11    |
| 15D10308              | 2.2 %  | 1.174626  | 0.000935 | 0.395606  | 0.001953 | 0.003540  | 0.000015 | 92.559      | 6.238214     | 1.00065419   | 1.031E-11    |
| 15D10309              | 2.4 %  | 1.206911  | 0.001320 | 0.405563  | 0.003208 | 0.003617  | 0.000022 | 92.569      | 6.239412     | 1.00065426   | 5.089E-12    |
| 15D10310              | 2.6 %  | 1.006231  | 0.000804 | 0.527390  | 0.002248 | 0.003004  | 0.000013 | 92.579      | 6.240696     | 1.00065433   | 9.352E-12    |
| 15D10312              | 2.8 %  | 0.893297  | 0.000742 | 0.617447  | 0.002466 | 0.002695  | 0.000012 | 92.597      | 6.242922     | 1.00065446   | 8.237E-12    |
| 15D10313              | 3.0 %  | 0.915201  | 0.000939 | 0.666447  | 0.003168 | 0.002718  | 0.000016 | 92.607      | 6.244121     | 1.00065453   | 5.256E-12    |
| 15D10314              | 3.3 %  | 0.790846  | 0.000709 | 0.745165  | 0.002945 | 0.002350  | 0.000012 | 92.617      | 6.245320     | 1.00065460   | 6.507E-12    |
| 15D10315              | 3.6 %  | 0.895111  | 0.001259 | 0.751421  | 0.004340 | 0.002705  | 0.000020 | 92.626      | 6.246519     | 1.00065467   | 3.153E-12    |
| 15D10317              | 3.9 %  | ✓0.821090 | 0.000951 | 0.783471  | 0.003676 | 0.002508  | 0.000016 | 92.644      | 6.248748     | 1.00065480   | 4.033E-12    |
| 15D10318              | 4.3 %  | ✓0.593960 | 0.000448 | 0.769160  | 0.002680 | 0.001739  | 0.000008 | 92.653      | 6.249862     | 1.00065486   | 1.003E-11    |
| 15D10319              | 4.6 %  | ✓0.650885 | 0.000513 | 0.726678  | 0.002611 | 0.001944  | 0.000009 | 92.662      | 6.250976     | 1.00065492   | 8.693E-12    |
| 15D10320              | 4.9 %  | ✓0.685909 | 0.000537 | 0.682814  | 0.002472 | 0.002052  | 0.000010 | 92.671      | 6.252005     | 1.00065498   | 9.205E-12    |
| 15D10322              | 5.2 %  | ✓0.752104 | 0.000596 | 0.653279  | 0.002428 | 0.002242  | 0.000010 | 92.688      | 6.254150     | 1.00065510   | 9.164E-12    |
| 15D10323              | 5.5 %  | ✓0.836311 | 0.000712 | 0.634425  | 0.002539 | 0.002537  | 0.000012 | 92.697      | 6.255265     | 1.00065517   | 7.460E-12    |
| 15D10324              | 5.8 %  | ✓1.043806 | 0.001289 | 0.616272  | 0.003936 | 0.003213  | 0.000020 | 92.706      | 6.256295     | 1.00065523   | 3.929E-12    |
| 15D10326              | 6.1 %  | 1.140121  | 0.001545 | 0.608309  | 0.004471 | 0.003601  | 0.000023 | 92.723      | 6.258441     | 1.00065535   | 3.574E-12    |
| 15D10327              | 6.5 %  | 0.913802  | 0.000870 | 0.601846  | 0.002756 | 0.002822  | 0.000015 | 92.731      | 6.259471     | 1.00065541   | 6.120E-12    |
| 15D10328              | 7.0 %  | 0.936046  | 0.000891 | 0.604071  | 0.002788 | 0.002894  | 0.000015 | 92.740      | 6.260587     | 1.00065547   | 5.911E-12    |
| 15D10330              | 7.6 %  | 1.062114  | 0.001074 | 0.584954  | 0.003050 | 0.003257  | 0.000018 | 92.758      | 6.262734     | 1.00065559   | 5.608E-12    |
| 15D10331              | 8.4 %  | 0.949263  | 0.000901 | 0.586585  | 0.002780 | 0.002924  | 0.000015 | 92.766      | 6.263765     | 1.00065565   | 6.105E-12    |
| 15D10332              | 9.4 %  | 0.924499  | 0.000834 | 0.602593  | 0.002675 | 0.002852  | 0.000015 | 92.775      | 6.264882     | 1.00065572   | 6.699E-12    |
| 15D10334              | 10.5 % | 1.069529  | 0.001170 | 0.666390  | 0.003626 | 0.003390  | 0.000019 | 92.792      | 6.267031     | 1.00065584   | 4.900E-12    |
| 15D10335              | 11.7 % | 0.939968  | 0.001269 | 0.828135  | 0.004264 | 0.003059  | 0.000020 | 92.801      | 6.268063     | 1.00065590   | 3.509E-12    |
| 15D10336              | 13.1 % | 1.061936  | 0.001971 | 1.084083  | 0.006666 | 0.003534  | 0.000028 | 92.810      | 6.269180     | 1.00065596   | 2.419E-12    |
| 15D10338              | 14.7 % | 1.112038  | 0.002622 | 1.724174  | 0.009642 | 0.003806  | 0.000037 | 92.827      | 6.271331     | 1.00065609   | 1.821E-12    |
| 15D10339              | 16.5 % | 1.613723  | 0.006180 | 2.953571  | 0.021066 | 0.005875  | 0.000072 | 92.835      | 6.272363     | 1.00065614   | 1.272E-12    |
| 15D10340              | 18.5 % | 1.559475  | 0.005136 | 6.032672  | 0.027961 | 0.006450  | 0.000068 | 92.844      | 6.273481     | 1.00065621   | 1.459E-12    |
| 15D10342              | 19.8 % | 1.943638  | 0.009790 | 7.495038  | 0.045343 | 0.008062  | 0.000100 | 92.863      | 6.275719     | 1.00065634   | 1.069E-12    |
| 15D10343              | 21.7 % | 2.013889  | 0.012268 | 8.188713  | 0.055496 | 0.008520  | 0.000122 | 92.872      | 6.276838     | 1.00065640   | 8.855E-13    |
| 15D10344              | 22.8 % | 2.135415  | 0.015404 | 7.646919  | 0.061888 | 0.008820  | 0.000145 | 92.881      | 6.277958     | 1.00065646   | 7.888E-13    |
| 15D10346              | 24.3 % | 1.938311  | 0.013986 | 6.899699  | 0.055319 | 0.007902  | 0.000136 | 92.898      | 6.280111     | 1.00065659   | 7.317E-13    |

OSU Argon Geochronology Lab  
CEOAS Oregon State University, Corvallis, USA



| Procedure<br>Blanks |        | 36Ar<br>[fA] | 1σ        | 37Ar<br>[fA] | 1σ        | 38Ar<br>[fA] | 1σ        | 39Ar<br>[fA] | 1σ        | 40Ar<br>[fA] | 1σ        |
|---------------------|--------|--------------|-----------|--------------|-----------|--------------|-----------|--------------|-----------|--------------|-----------|
| 15D10306            | 2.0 %  | 0.0108399    | 0.0007058 | 0.0133170    | 0.0281170 | 0.0224064    | 0.0278018 | 0.0212227    | 0.0347495 | 3.1072243    | 0.0633382 |
| 15D10308            | 2.2 %  | 0.0107826    | 0.0007058 | 0.0127593    | 0.0281170 | 0.0213820    | 0.0278018 | 0.0252605    | 0.0347495 | 3.0721008    | 0.0633382 |
| 15D10309            | 2.4 %  | 0.0107529    | 0.0007058 | 0.0124089    | 0.0281170 | 0.0209479    | 0.0278018 | 0.0271870    | 0.0347495 | 3.0548656    | 0.0633382 |
| 15D10310            | 2.6 %  | 0.0107211    | 0.0007058 | 0.0119871    | 0.0281170 | 0.0205564    | 0.0278018 | 0.0291246    | 0.0347495 | 3.0371397    | 0.0633382 |
| 15D10312            | 2.8 %  | 0.0106659    | 0.0007058 | 0.0111425    | 0.0281170 | 0.0200580    | 0.0278018 | 0.0321726    | 0.0347495 | 3.0082293    | 0.0633382 |
| 15D10313            | 3.0 %  | 0.0106362    | 0.0007058 | 0.0106280    | 0.0281170 | 0.0198844    | 0.0278018 | 0.0336509    | 0.0347495 | 2.9936153    | 0.0633382 |
| 15D10314            | 3.3 %  | 0.0106065    | 0.0007058 | 0.0100718    | 0.0281170 | 0.0197770    | 0.0278018 | 0.0350150    | 0.0347495 | 2.9796686    | 0.0633382 |
| 15D10315            | 3.6 %  | 0.0105768    | 0.0007058 | 0.0094738    | 0.0281170 | 0.0197360    | 0.0278018 | 0.0362650    | 0.0347495 | 2.9663890    | 0.0633382 |
| 15D10317            | 3.9 %  | 0.0105216    | 0.0007058 | 0.0082523    | 0.0281170 | 0.0198356    | 0.0278018 | 0.0382837    | 0.0347495 | 2.9434972    | 0.0633382 |
| 15D10318            | 4.3 %  | 0.0104940    | 0.0007058 | 0.0075876    | 0.0281170 | 0.0199711    | 0.0278018 | 0.0391454    | 0.0347495 | 2.9329142    | 0.0633382 |
| 15D10319            | 4.6 %  | 0.0104665    | 0.0007058 | 0.0068868    | 0.0281170 | 0.0201639    | 0.0278018 | 0.0399088    | 0.0347495 | 2.9229066    | 0.0633382 |
| 15D10320            | 4.9 %  | 0.0104410    | 0.0007058 | 0.0062080    | 0.0281170 | 0.0203925    | 0.0278018 | 0.0405261    | 0.0347495 | 2.9141794    | 0.0633382 |
| 15D10322            | 5.2 %  | 0.0103879    | 0.0007058 | 0.0046951    | 0.0281170 | 0.0210252    | 0.0278018 | 0.0415429    | 0.0347495 | 2.8975722    | 0.0633382 |
| 15D10323            | 5.5 %  | 0.0103604    | 0.0007058 | 0.0038558    | 0.0281170 | 0.0214378    | 0.0278018 | 0.0419278    | 0.0347495 | 2.8897772    | 0.0633382 |
| 15D10324            | 5.8 %  | 0.0103349    | 0.0007058 | 0.0030491    | 0.0281170 | 0.0218693    | 0.0278018 | 0.0421957    | 0.0347495 | 2.8830925    | 0.0633382 |
| 15D10326            | 6.1 %  | 0.0102818    | 0.0007058 | 0.0012699    | 0.0281170 | 0.0229249    | 0.0278018 | 0.0424847    | 0.0347495 | 2.8707405    | 0.0633382 |
| 15D10327            | 6.5 %  | 0.0102564    | 0.0007058 | 0.0003685    | 0.0281170 | 0.0235066    | 0.0278018 | 0.0424942    | 0.0347495 | 2.8655673    | 0.0633382 |
| 15D10328            | 7.0 %  | 0.0102288    | 0.0007058 | 0.0006425    | 0.0281170 | 0.0241918    | 0.0278018 | 0.0424098    | 0.0347495 | 2.8605161    | 0.0633382 |
| 15D10330            | 7.6 %  | 0.0101758    | 0.0007058 | 0.0026882    | 0.0281170 | 0.0256701    | 0.0278018 | 0.0419710    | 0.0347495 | 2.8524193    | 0.0633382 |
| 15D10331            | 8.4 %  | 0.0101503    | 0.0007058 | 0.0037174    | 0.0281170 | 0.0264548    | 0.0278018 | 0.0416311    | 0.0347495 | 2.8492886    | 0.0633382 |
| 15D10332            | 9.4 %  | 0.0101227    | 0.0007058 | 0.0048671    | 0.0281170 | 0.0273598    | 0.0278018 | 0.0411683    | 0.0347495 | 2.8464502    | 0.0633382 |
| 15D10334            | 10.5 % | 0.0100697    | 0.0007058 | 0.0071791    | 0.0281170 | 0.0292609    | 0.0278018 | 0.0400017    | 0.0347495 | 2.8426086    | 0.0633382 |
| 15D10335            | 11.7 % | 0.0100442    | 0.0007058 | 0.0083362    | 0.0281170 | 0.0302485    | 0.0278018 | 0.0393125    | 0.0347495 | 2.8415204    | 0.0633382 |
| 15D10336            | 13.1 % | 0.0100166    | 0.0007058 | 0.0096244    | 0.0281170 | 0.0313734    | 0.0278018 | 0.0384712    | 0.0347495 | 2.8408946    | 0.0633382 |
| 15D10338            | 14.7 % | 0.0099636    | 0.0007058 | 0.0122029    | 0.0281170 | 0.0336973    | 0.0278018 | 0.0365769    | 0.0347495 | 2.8413083    | 0.0633382 |
| 15D10339            | 16.5 % | 0.0099381    | 0.0007058 | 0.0134878    | 0.0281170 | 0.0348879    | 0.0278018 | 0.0355383    | 0.0347495 | 2.8422626    | 0.0633382 |
| 15D10340            | 18.5 % | 0.0099105    | 0.0007058 | 0.0149145    | 0.0281170 | 0.0362326    | 0.0278018 | 0.0343186    | 0.0347495 | 2.8438496    | 0.0633382 |
| 15D10342            | 19.8 % | 0.0098553    | 0.0007058 | 0.0178760    | 0.0281170 | 0.0390935    | 0.0278018 | 0.0315840    | 0.0347495 | 2.8487495    | 0.0633382 |
| 15D10343            | 21.7 % | 0.0098277    | 0.0007058 | 0.0194108    | 0.0281170 | 0.0406097    | 0.0278018 | 0.0300691    | 0.0347495 | 2.8520624    | 0.0633382 |
| 15D10344            | 22.8 % | 0.0098002    | 0.0007058 | 0.0209815    | 0.0281170 | 0.0421831    | 0.0278018 | 0.0284558    | 0.0347495 | 2.8559506    | 0.0633382 |
| 15D10346            | 24.3 % | 0.0097471    | 0.0007058 | 0.0241035    | 0.0281170 | 0.0453695    | 0.0278018 | 0.0250768    | 0.0347495 | 2.8650449    | 0.0633382 |



| OSU Argon Geochronology Lab |        |           |           |        |                |         |        |        |                |          |          |        |                |          |        |        |                |           |         |        |                |    |    |  |  |
|-----------------------------|--------|-----------|-----------|--------|----------------|---------|--------|--------|----------------|----------|----------|--------|----------------|----------|--------|--------|----------------|-----------|---------|--------|----------------|----|----|--|--|
| Intercept<br>Values         | 36Ar   |           |           |        |                | 37Ar    |        |        |                |          | 38Ar     |        |                |          |        | 39Ar   |                |           |         |        | 40Ar           |    |    |  |  |
|                             | [fA]   | 1σ        | r2        |        |                | [fA]    | 1σ     | r2     |                |          | [fA]     | 1σ     | r2             |          |        | [fA]   | 1σ             | r2        |         |        | [fA]           | 1σ | r2 |  |  |
| 15D10306                    | 2.0 %  | 0.6824711 | 0.0019241 | 0.8321 | EXP 150 of 150 | 10.2653 | 0.0327 | 0.7330 | EXP 150 of 150 | 7.708187 | 0.028423 | 0.7323 | EXP 150 of 150 | 188.0397 | 0.0411 | 0.9989 | EXP 150 of 150 | 239.69674 | 0.04604 | 0.9958 | EXP 150 of 150 |    |    |  |  |
| 15D10308                    | 2.2 %  | 0.6189871 | 0.0018211 | 0.8038 | EXP 150 of 150 | 11.3896 | 0.0302 | 0.8105 | EXP 150 of 150 | 6.758561 | 0.027782 | 0.6623 | EXP 150 of 150 | 181.6678 | 0.0409 | 0.9989 | EXP 150 of 150 | 218.59215 | 0.04258 | 0.9951 | EXP 150 of 150 |    |    |  |  |
| 15D10309                    | 2.4 %  | 0.3091456 | 0.0013984 | 0.5491 | EXP 150 of 150 | 5.6113  | 0.0285 | 0.5466 | EXP 150 of 150 | 3.162733 | 0.026254 | 0.3832 | EXP 149 of 150 | 87.2405  | 0.0338 | 0.9965 | EXP 150 of 150 | 109.37822 | 0.03539 | 0.9294 | EXP 150 of 150 |    |    |  |  |
| 15D10310                    | 2.6 %  | 0.5568720 | 0.0017437 | 0.7689 | EXP 150 of 150 | 16.0581 | 0.0316 | 0.8928 | EXP 150 of 150 | 5.706335 | 0.027190 | 0.6180 | EXP 150 of 150 | 192.2799 | 0.0384 | 0.9991 | EXP 150 of 150 | 198.44258 | 0.03916 | 0.9937 | EXP 150 of 150 |    |    |  |  |
| 15D10312                    | 2.8 %  | 0.4969090 | 0.0016060 | 0.7901 | EXP 150 of 150 | 18.6436 | 0.0291 | 0.9294 | EXP 150 of 150 | 4.677969 | 0.025755 | 0.5419 | EXP 150 of 150 | 190.7788 | 0.0400 | 0.9990 | EXP 150 of 150 | 175.12509 | 0.04125 | 0.9888 | EXP 150 of 150 |    |    |  |  |
| 15D10313                    | 3.0 %  | 0.3160706 | 0.0014249 | 0.5249 | EXP 150 of 150 | 12.5330 | 0.0312 | 0.8407 | EXP 150 of 150 | 2.627349 | 0.026152 | 0.2443 | EXP 149 of 150 | 118.8266 | 0.0373 | 0.9977 | EXP 150 of 150 | 112.81277 | 0.03734 | 0.9134 | EXP 150 of 150 |    |    |  |  |
| 15D10314                    | 3.3 %  | 0.3888382 | 0.0013876 | 0.6626 | EXP 150 of 150 | 20.0665 | 0.0311 | 0.9299 | EXP 150 of 150 | 3.164265 | 0.027915 | 0.3354 | EXP 150 of 150 | 170.2323 | 0.0377 | 0.9989 | EXP 150 of 150 | 138.94096 | 0.03733 | 0.9706 | EXP 150 of 150 |    |    |  |  |
| 15D10315                    | 3.6 %  | 0.1970027 | 0.0010640 | 0.3080 | EXP 150 of 150 | 8.6670  | 0.0291 | 0.7344 | EXP 150 of 150 | 1.320483 | 0.026091 | 0.0638 | EXP 150 of 150 | 72.9062  | 0.0291 | 0.9963 | EXP 150 of 150 | 68.85285  | 0.03261 | 0.7951 | EXP 150 of 150 |    |    |  |  |
| 15D10317                    | 3.9 %  | 0.2515343 | 0.0012216 | 0.5078 | EXP 150 of 150 | 12.5910 | 0.0299 | 0.8611 | EXP 150 of 150 | 1.707393 | 0.028100 | 0.1142 | EXP 150 of 150 | 101.6501 | 0.0297 | 0.9981 | EXP 150 of 150 | 87.21985  | 0.03287 | 0.3077 | EXP 150 of 150 |    |    |  |  |
| 15D10318                    | 4.3 %  | 0.5849072 | 0.0017725 | 0.7685 | EXP 150 of 150 | 42.4462 | 0.0305 | 0.9844 | EXP 150 of 150 | 5.305773 | 0.028688 | 0.5492 | EXP 150 of 150 | 349.1898 | 0.0432 | 0.9997 | EXP 150 of 150 | 212.41227 | 0.03648 | 0.9942 | EXP 150 of 150 |    |    |  |  |
| 15D10319                    | 4.6 %  | 0.5185742 | 0.0015491 | 0.7604 | EXP 150 of 150 | 31.7279 | 0.0306 | 0.9718 | EXP 150 of 150 | 3.981021 | 0.026651 | 0.4175 | EXP 150 of 150 | 276.3204 | 0.0377 | 0.9996 | EXP 150 of 150 | 184.56884 | 0.03833 | 0.9896 | EXP 150 of 150 |    |    |  |  |
| 15D10320                    | 4.9 %  | 0.5492492 | 0.0018652 | 0.7497 | EXP 149 of 150 | 29.9512 | 0.0302 | 0.9690 | EXP 150 of 150 | 3.908182 | 0.028393 | 0.3808 | EXP 149 of 150 | 277.6526 | 0.0459 | 0.9994 | EXP 150 of 150 | 195.25680 | 0.03878 | 0.9917 | EXP 150 of 150 |    |    |  |  |
| 15D10322                    | 5.2 %  | 0.5449055 | 0.0016160 | 0.7882 | EXP 150 of 150 | 26.0062 | 0.0311 | 0.9575 | EXP 150 of 150 | 3.545643 | 0.026120 | 0.3896 | EXP 150 of 150 | 252.0797 | 0.0434 | 0.9993 | EXP 150 of 150 | 194.37409 | 0.04227 | 0.9914 | EXP 150 of 150 |    |    |  |  |
| 15D10323                    | 5.5 %  | 0.4531752 | 0.0015623 | 0.7076 | EXP 149 of 150 | 18.4865 | 0.0290 | 0.9267 | EXP 149 of 150 | 2.535622 | 0.026121 | 0.2202 | EXP 150 of 150 | 184.5546 | 0.0383 | 0.9990 | EXP 150 of 150 | 158.76069 | 0.03842 | 0.9846 | EXP 150 of 150 |    |    |  |  |
| 15D10324                    | 5.8 %  | 0.2469164 | 0.0010951 | 0.5628 | EXP 150 of 150 | 7.5780  | 0.0298 | 0.6427 | EXP 150 of 150 | 1.072748 | 0.024199 | 0.0797 | EXP 150 of 150 | 77.9031  | 0.0308 | 0.9962 | EXP 150 of 150 | 84.97689  | 0.03222 | 0.1293 | EXP 150 of 150 |    |    |  |  |
| 15D10326                    | 6.1 %  | 0.2311143 | 0.0010175 | 0.5749 | EXP 150 of 150 | 6.2255  | 0.0292 | 0.5794 | EXP 150 of 150 | 0.887276 | 0.027131 | 0.0280 | EXP 150 of 150 | 64.8800  | 0.0287 | 0.9954 | EXP 150 of 150 | 77.54111  | 0.03441 | 0.0015 | EXP 150 of 150 |    |    |  |  |
| 15D10327                    | 6.5 %  | 0.3800506 | 0.0014501 | 0.6688 | EXP 150 of 150 | 13.1550 | 0.0297 | 0.8572 | EXP 150 of 150 | 1.965218 | 0.026871 | 0.1706 | EXP 150 of 150 | 138.5679 | 0.0367 | 0.9984 | EXP 150 of 150 | 130.73085 | 0.04198 | 0.9658 | EXP 150 of 150 |    |    |  |  |
| 15D10328                    | 7.0 %  | 0.3677916 | 0.0013433 | 0.6761 | EXP 150 of 150 | 12.4474 | 0.0275 | 0.8625 | EXP 149 of 150 | 1.842486 | 0.027013 | 0.1045 | EXP 150 of 150 | 130.6673 | 0.0352 | 0.9983 | EXP 150 of 150 | 126.36832 | 0.03468 | 0.9713 | EXP 150 of 150 |    |    |  |  |
| 15D10330                    | 7.6 %  | 0.3466254 | 0.0014420 | 0.6086 | EXP 150 of 150 | 10.0726 | 0.0286 | 0.8095 | EXP 150 of 150 | 1.574713 | 0.026492 | 0.1400 | EXP 150 of 150 | 109.2610 | 0.0318 | 0.9981 | EXP 150 of 150 | 120.02891 | 0.04130 | 0.9543 | EXP 150 of 150 |    |    |  |  |
| 15D10331                    | 8.4 %  | 0.3780078 | 0.0014002 | 0.6897 | EXP 150 of 150 | 12.3000 | 0.0300 | 0.8347 | EXP 150 of 150 | 1.977959 | 0.026712 | 0.1815 | EXP 150 of 150 | 133.0687 | 0.0350 | 0.9984 | EXP 150 of 150 | 130.40439 | 0.03964 | 0.9694 | EXP 150 of 150 |    |    |  |  |
| 15D10332                    | 9.4 %  | 0.4144206 | 0.0015924 | 0.6623 | EXP 150 of 150 | 14.2350 | 0.0302 | 0.8830 | EXP 150 of 150 | 2.262297 | 0.028508 | 0.1405 | EXP 150 of 150 | 149.9374 | 0.0386 | 0.9985 | EXP 150 of 150 | 142.82735 | 0.03643 | 0.9827 | EXP 150 of 150 |    |    |  |  |
| 15D10334                    | 10.5 % | 0.3139205 | 0.0013302 | 0.6069 | EXP 150 of 150 | 9.9449  | 0.0318 | 0.7727 | EXP 150 of 150 | 1.466284 | 0.025736 | 0.1150 | EXP 150 of 150 | 94.8041  | 0.0323 | 0.9973 | EXP 150 of 150 | 105.22087 | 0.03857 | 0.9156 | EXP 150 of 150 |    |    |  |  |
| 15D10335                    | 11.7 % | 0.2334538 | 0.0010959 | 0.5314 | EXP 150 of 150 | 10.0678 | 0.0270 | 0.8108 | EXP 149 of 150 | 1.243161 | 0.027294 | 0.1088 | EXP 150 of 150 | 77.2582  | 0.0327 | 0.9959 | EXP 150 of 150 | 76.15907  | 0.03826 | 0.0124 | EXP 150 of 150 |    |    |  |  |
| 15D10336                    | 13.1 % | 0.1675650 | 0.0009332 | 0.3765 | EXP 150 of 150 | 8.0392  | 0.0295 | 0.7071 | EXP 150 of 150 | 0.738406 | 0.027275 | 0.0172 | EXP 150 of 150 | 47.1666  | 0.0308 | 0.9900 | EXP 150 of 150 | 53.39426  | 0.03517 | 0.8865 | EXP 150 of 150 |    |    |  |  |
| 15D10338                    | 14.7 % | 0.1318889 | 0.0008565 | 0.1305 | EXP 150 of 150 | 9.1844  | 0.0275 | 0.7747 | EXP 150 of 150 | 0.543700 | 0.025629 | 0.0055 | EXP 150 of 150 | 33.9058  | 0.0289 | 0.9828 | EXP 150 of 150 | 40.88619  | 0.02918 | 0.9611 | EXP 150 of 150 |    |    |  |  |
| 15D10339                    | 16.5 % | 0.1005199 | 0.0007687 | 0.1210 | EXP 150 of 150 | 7.5674  | 0.0327 | 0.5729 | EXP 150 of 150 | 0.233703 | 0.030156 | 0.0002 | EXP 150 of 150 | 16.3361  | 0.0271 | 0.9321 | EXP 150 of 150 | 29.41295  | 0.02974 | 0.9758 | EXP 150 of 150 |    |    |  |  |
| 15D10340                    | 18.5 % | 0.1279815 | 0.0009248 | 0.1452 | EXP 150 of 150 | 18.3661 | 0.0313 | 0.9128 | EXP 150 of 150 | 0.344881 | 0.029655 | 0.0005 | EXP 150 of 150 | 19.3880  | 0.0262 | 0.9544 | EXP 150 of 150 | 33.33085  | 0.03137 | 0.9676 | EXP 150 of 150 |    |    |  |  |
| 15D10342                    | 19.8 % | 0.0965819 | 0.0006916 | 0.0380 | EXP 150 of 150 | 13.3972 | 0.0315 | 0.8521 | EXP 150 of 150 | 0.266235 | 0.027715 | 0.0383 | EXP 150 of 150 | 11.4047  | 0.0282 | 0.8566 | EXP 150 of 150 | 25.17755  | 0.02644 | 0.9824 | EXP 150 of 150 |    |    |  |  |
| 15D10343                    | 21.7 % | 0.0831218 | 0.0006608 | 0.0300 | EXP 150 of 150 | 11.6999 | 0.0293 | 0.8378 | EXP 150 of 150 | 0.147224 | 0.026231 | 0.0011 | EXP 150 of 150 | 9.1255   | 0.0259 | 0.8187 | EXP 150 of 150 | 21.35461  | 0.02777 | 0.9835 | EXP 150 of 150 |    |    |  |  |
| 15D10344                    | 22.8 % | 0.0735425 | 0.0006608 | 0.0042 | EXP 150 of 150 | 9.1709  | 0.0314 | 0.7278 | EXP 149 of 150 | 0.099958 | 0.027832 | 0.0003 | EXP 149 of 150 | 7.6692   | 0.0271 | 0.7245 | EXP 150 of 150 | 19.33717  | 0.03106 | 0.9809 | EXP 150 of 150 |    |    |  |  |
| 15D10346                    | 24.3 % | 0.0681053 | 0.0006167 | 0.0040 | EXP 150 of 150 | 8.4490  | 0.0288 | 0.7294 | EXP 150 of 150 | 0.161137 | 0.024756 | 0.0049 | EXP 150 of 150 | 7.8338   | 0.0255 | 0.7720 | EXP 150 of 150 | 18.15383  | 0.03055 | 0.9812 | EXP 150 of 150 |    |    |  |  |



| OSU Argon Geochronology Lab |        |            |            |                   |             |      |                  |                  |       |                     |                    |       |            |       |               |       |             |       |              |                        |     |       |      |      |     |        |             |       |       |         |  |  |  |  |
|-----------------------------|--------|------------|------------|-------------------|-------------|------|------------------|------------------|-------|---------------------|--------------------|-------|------------|-------|---------------|-------|-------------|-------|--------------|------------------------|-----|-------|------|------|-----|--------|-------------|-------|-------|---------|--|--|--|--|
| Sample Parameters           |        | Sample     | Material   | Location          | Analyst     | Temp | Standard Name    | Standard (in Ma) | %1σ   | Standard Reference  | Standard 40Ar/39Ar | %1σ   | J          | %1σ   | Air 40Ar/36Ar | %1σ   | MDF (lin)   | %1σ   | Volume Ratio | Sensitivity (mol/volt) | Day | Month | Year | Hour | Min | Resist | Irradiation | X-pos | Y-pos | Z/H-pos |  |  |  |  |
| 15D10306                    | 2.0 %  | 1180043-1a | Groundmass | Kerguelen Plateau | Dan Miggins | 2    | FCT-NM (7B24-14) | 28.201           | 0.082 | Kuiper et al (2008) | 8.89125            | 0.115 | 0.00176774 | 0.115 | 303.334       | 0.117 | 0.993535076 | 0.065 | 1            | 4.8E-14                | 3   | APR   | 2015 | 4    | 4   | 1      | 14-OSU-07   | 0.00  | 0.00  | 33.92   |  |  |  |  |
| 15D10308                    | 2.2 %  | 1180043-1a | Groundmass | Kerguelen Plateau | Dan Miggins | 2.2  | FCT-NM (7B24-14) | 28.201           | 0.082 | Kuiper et al (2008) | 8.89125            | 0.115 | 0.00176774 | 0.115 | 303.334       | 0.117 | 0.993535076 | 0.065 | 1            | 4.8E-14                | 3   | APR   | 2015 | 4    | 31  | 1      | 14-OSU-07   | 0.00  | 0.00  | 33.92   |  |  |  |  |
| 15D10309                    | 2.4 %  | 1180043-1a | Groundmass | Kerguelen Plateau | Dan Miggins | 2.4  | FCT-NM (7B24-14) | 28.201           | 0.082 | Kuiper et al (2008) | 8.89125            | 0.115 | 0.00176774 | 0.115 | 303.334       | 0.117 | 0.993535076 | 0.065 | 1            | 4.8E-14                | 3   | APR   | 2015 | 4    | 45  | 1      | 14-OSU-07   | 0.00  | 0.00  | 33.92   |  |  |  |  |
| 15D10310                    | 2.6 %  | 1180043-1a | Groundmass | Kerguelen Plateau | Dan Miggins | 2.6  | FCT-NM (7B24-14) | 28.201           | 0.082 | Kuiper et al (2008) | 8.89125            | 0.115 | 0.00176774 | 0.115 | 303.334       | 0.117 | 0.993535076 | 0.065 | 1            | 4.8E-14                | 3   | APR   | 2015 | 5    | 0   | 1      | 14-OSU-07   | 0.00  | 0.00  | 33.92   |  |  |  |  |
| 15D10312                    | 2.8 %  | 1180043-1a | Groundmass | Kerguelen Plateau | Dan Miggins | 2.8  | FCT-NM (7B24-14) | 28.201           | 0.082 | Kuiper et al (2008) | 8.89125            | 0.115 | 0.00176774 | 0.115 | 303.334       | 0.117 | 0.993535076 | 0.065 | 1            | 4.8E-14                | 3   | APR   | 2015 | 5    | 26  | 1      | 14-OSU-07   | 0.00  | 0.00  | 33.92   |  |  |  |  |
| 15D10313                    | 3.0 %  | 1180043-1a | Groundmass | Kerguelen Plateau | Dan Miggins | 3    | FCT-NM (7B24-14) | 28.201           | 0.082 | Kuiper et al (2008) | 8.89125            | 0.115 | 0.00176774 | 0.115 | 303.334       | 0.117 | 0.993535076 | 0.065 | 1            | 4.8E-14                | 3   | APR   | 2015 | 5    | 40  | 1      | 14-OSU-07   | 0.00  | 0.00  | 33.92   |  |  |  |  |
| 15D10314                    | 3.3 %  | 1180043-1a | Groundmass | Kerguelen Plateau | Dan Miggins | 3.3  | FCT-NM (7B24-14) | 28.201           | 0.082 | Kuiper et al (2008) | 8.89125            | 0.115 | 0.00176774 | 0.115 | 303.334       | 0.117 | 0.993535076 | 0.065 | 1            | 4.8E-14                | 3   | APR   | 2015 | 5    | 54  | 1      | 14-OSU-07   | 0.00  | 0.00  | 33.92   |  |  |  |  |
| 15D10315                    | 3.6 %  | 1180043-1a | Groundmass | Kerguelen Plateau | Dan Miggins | 3.6  | FCT-NM (7B24-14) | 28.201           | 0.082 | Kuiper et al (2008) | 8.89125            | 0.115 | 0.00176774 | 0.115 | 303.334       | 0.117 | 0.993535076 | 0.065 | 1            | 4.8E-14                | 3   | APR   | 2015 | 6    | 8   | 1      | 14-OSU-07   | 0.00  | 0.00  | 33.92   |  |  |  |  |
| 15D10317                    | 3.9 %  | 1180043-1a | Groundmass | Kerguelen Plateau | Dan Miggins | 3.9  | FCT-NM (7B24-14) | 28.201           | 0.082 | Kuiper et al (2008) | 8.89125            | 0.115 | 0.00176774 | 0.115 | 303.334       | 0.117 | 0.993535076 | 0.065 | 1            | 4.8E-14                | 3   | APR   | 2015 | 6    | 34  | 1      | 14-OSU-07   | 0.00  | 0.00  | 33.92   |  |  |  |  |
| 15D10318                    | 4.3 %  | 1180043-1a | Groundmass | Kerguelen Plateau | Dan Miggins | 4.3  | FCT-NM (7B24-14) | 28.201           | 0.082 | Kuiper et al (2008) | 8.89125            | 0.115 | 0.00176774 | 0.115 | 303.334       | 0.117 | 0.993535076 | 0.065 | 1            | 4.8E-14                | 3   | APR   | 2015 | 6    | 47  | 1      | 14-OSU-07   | 0.00  | 0.00  | 33.92   |  |  |  |  |
| 15D10319                    | 4.6 %  | 1180043-1a | Groundmass | Kerguelen Plateau | Dan Miggins | 4.6  | FCT-NM (7B24-14) | 28.201           | 0.082 | Kuiper et al (2008) | 8.89125            | 0.115 | 0.00176774 | 0.115 | 303.334       | 0.117 | 0.993535076 | 0.065 | 1            | 4.8E-14                | 3   | APR   | 2015 | 7    | 0   | 1      | 14-OSU-07   | 0.00  | 0.00  | 33.92   |  |  |  |  |
| 15D10320                    | 4.9 %  | 1180043-1a | Groundmass | Kerguelen Plateau | Dan Miggins | 4.9  | FCT-NM (7B24-14) | 28.201           | 0.082 | Kuiper et al (2008) | 8.89125            | 0.115 | 0.00176774 | 0.115 | 303.334       | 0.117 | 0.993535076 | 0.065 | 1            | 4.8E-14                | 3   | APR   | 2015 | 7    | 12  | 1      | 14-OSU-07   | 0.00  | 0.00  | 33.92   |  |  |  |  |
| 15D10322                    | 5.2 %  | 1180043-1a | Groundmass | Kerguelen Plateau | Dan Miggins | 5.2  | FCT-NM (7B24-14) | 28.201           | 0.082 | Kuiper et al (2008) | 8.89125            | 0.115 | 0.00176774 | 0.115 | 303.334       | 0.117 | 0.993535076 | 0.065 | 1            | 4.8E-14                | 3   | APR   | 2015 | 7    | 37  | 1      | 14-OSU-07   | 0.00  | 0.00  | 33.92   |  |  |  |  |
| 15D10323                    | 5.5 %  | 1180043-1a | Groundmass | Kerguelen Plateau | Dan Miggins | 5.5  | FCT-NM (7B24-14) | 28.201           | 0.082 | Kuiper et al (2008) | 8.89125            | 0.115 | 0.00176774 | 0.115 | 303.334       | 0.117 | 0.993535076 | 0.065 | 1            | 4.8E-14                | 3   | APR   | 2015 | 7    | 50  | 1      | 14-OSU-07   | 0.00  | 0.00  | 33.92   |  |  |  |  |
| 15D10324                    | 5.8 %  | 1180043-1a | Groundmass | Kerguelen Plateau | Dan Miggins | 5.8  | FCT-NM (7B24-14) | 28.201           | 0.082 | Kuiper et al (2008) | 8.89125            | 0.115 | 0.00176774 | 0.115 | 303.334       | 0.117 | 0.993535076 | 0.065 | 1            | 4.8E-14                | 3   | APR   | 2015 | 8    | 2   | 1      | 14-OSU-07   | 0.00  | 0.00  | 33.92   |  |  |  |  |
| 15D10326                    | 6.1 %  | 1180043-1a | Groundmass | Kerguelen Plateau | Dan Miggins | 6.1  | FCT-NM (7B24-14) | 28.201           | 0.082 | Kuiper et al (2008) | 8.89125            | 0.115 | 0.00176774 | 0.115 | 303.334       | 0.117 | 0.993535076 | 0.065 | 1            | 4.8E-14                | 3   | APR   | 2015 | 8    | 27  | 1      | 14-OSU-07   | 0.00  | 0.00  | 33.92   |  |  |  |  |
| 15D10327                    | 6.5 %  | 1180043-1a | Groundmass | Kerguelen Plateau | Dan Miggins | 6.5  | FCT-NM (7B24-14) | 28.201           | 0.082 | Kuiper et al (2008) | 8.89125            | 0.115 | 0.00176774 | 0.115 | 303.334       | 0.117 | 0.993535076 | 0.065 | 1            | 4.8E-14                | 3   | APR   | 2015 | 8    | 39  | 1      | 14-OSU-07   | 0.00  | 0.00  | 33.92   |  |  |  |  |
| 15D10328                    | 7.0 %  | 1180043-1a | Groundmass | Kerguelen Plateau | Dan Miggins | 7    | FCT-NM (7B24-14) | 28.201           | 0.082 | Kuiper et al (2008) | 8.89125            | 0.115 | 0.00176774 | 0.115 | 303.334       | 0.117 | 0.993535076 | 0.065 | 1            | 4.8E-14                | 3   | APR   | 2015 | 8    | 52  | 1      | 14-OSU-07   | 0.00  | 0.00  | 33.92   |  |  |  |  |
| 15D10330                    | 7.6 %  | 1180043-1a | Groundmass | Kerguelen Plateau | Dan Miggins | 7.6  | FCT-NM (7B24-14) | 28.201           | 0.082 | Kuiper et al (2008) | 8.89125            | 0.115 | 0.00176774 | 0.115 | 303.334       | 0.117 | 0.993535076 | 0.065 | 1            | 4.8E-14                | 3   | APR   | 2015 | 9    | 17  | 1      | 14-OSU-07   | 0.00  | 0.00  | 33.92   |  |  |  |  |
| 15D10331                    | 8.4 %  | 1180043-1a | Groundmass | Kerguelen Plateau | Dan Miggins | 8.4  | FCT-NM (7B24-14) | 28.201           | 0.082 | Kuiper et al (2008) | 8.89125            | 0.115 | 0.00176774 | 0.115 | 303.334       | 0.117 | 0.993535076 | 0.065 | 1            | 4.8E-14                | 3   | APR   | 2015 | 9    | 29  | 1      | 14-OSU-07   | 0.00  | 0.00  | 33.92   |  |  |  |  |
| 15D10332                    | 9.4 %  | 1180043-1a | Groundmass | Kerguelen Plateau | Dan Miggins | 9.4  | FCT-NM (7B24-14) | 28.201           | 0.082 | Kuiper et al (2008) | 8.89125            | 0.115 | 0.00176774 | 0.115 | 303.334       | 0.117 | 0.993535076 | 0.065 | 1            | 4.8E-14                | 3   | APR   | 2015 | 9    | 42  | 1      | 14-OSU-07   | 0.00  | 0.00  | 33.92   |  |  |  |  |
| 15D10334                    | 10.5 % | 1180043-1a | Groundmass | Kerguelen Plateau | Dan Miggins | 10.5 | FCT-NM (7B24-14) | 28.201           | 0.082 | Kuiper et al (2008) | 8.89125            | 0.115 | 0.00176774 | 0.115 | 303.334       | 0.117 | 0.993535076 | 0.065 | 1            | 4.8E-14                | 3   | APR   | 2015 | 10   | 7   | 1      | 14-OSU-07   | 0.00  | 0.00  | 33.92   |  |  |  |  |
| 15D10335                    | 11.7 % | 1180043-1a | Groundmass | Kerguelen Plateau | Dan Miggins | 11.7 | FCT-NM (7B24-14) | 28.201           | 0.082 | Kuiper et al (2008) | 8.89125            | 0.115 | 0.00176774 | 0.115 | 303.334       | 0.117 | 0.993535076 | 0.065 | 1            | 4.8E-14                | 3   | APR   | 2015 | 10   | 19  | 1      | 14-OSU-07   | 0.00  | 0.00  | 33.92   |  |  |  |  |
| 15D10336                    | 13.1 % | 1180043-1a | Groundmass | Kerguelen Plateau | Dan Miggins | 13.1 | FCT-NM (7B24-14) | 28.201           | 0.082 | Kuiper et al (2008) | 8.89125            | 0.115 | 0.00176774 | 0.115 | 303.334       | 0.117 | 0.993535076 | 0.065 | 1            | 4.8E-14                | 3   | APR   | 2015 | 10   | 32  | 1      | 14-OSU-07   | 0.00  | 0.00  | 33.92   |  |  |  |  |
| 15D10338                    | 14.7 % | 1180043-1a | Groundmass | Kerguelen Plateau | Dan Miggins | 14.7 | FCT-NM (7B24-14) | 28.201           | 0.082 | Kuiper et al (2008) | 8.89125            | 0.115 | 0.00176774 | 0.115 | 303.334       | 0.117 | 0.993535076 | 0.065 | 1            | 4.8E-14                | 3   | APR   | 2015 | 10   | 57  | 1      | 14-OSU-07   | 0.00  | 0.00  | 33.92   |  |  |  |  |
| 15D10339                    | 16.5 % | 1180043-1a | Groundmass | Kerguelen Plateau | Dan Miggins | 16.5 | FCT-NM (7B24-14) | 28.201           | 0.082 | Kuiper et al (2008) | 8.89125            | 0.115 | 0.00176774 | 0.115 | 303.334       | 0.117 | 0.993535076 | 0.065 | 1            | 4.8E-14                | 3   | APR   | 2015 | 11   | 9   | 1      | 14-OSU-07   | 0.00  | 0.00  | 33.92   |  |  |  |  |
| 15D10340                    | 18.5 % | 1180043-1a | Groundmass | Kerguelen Plateau | Dan Miggins | 18.5 | FCT-NM (7B24-14) | 28.201           | 0.082 | Kuiper et al (2008) | 8.89125            | 0.115 | 0.00176774 | 0.115 | 303.334       | 0.117 | 0.993535076 | 0.065 | 1            | 4.8E-14                | 3   | APR   | 2015 | 11   | 22  | 1      | 14-OSU-07   | 0.00  | 0.00  | 33.92   |  |  |  |  |
| 15D10342                    | 19.8 % | 1180043-1a | Groundmass | Kerguelen Plateau | Dan Miggins | 19.8 | FCT-NM (7B24-14) | 28.201           | 0.082 | Kuiper et al (2008) | 8.89125            | 0.115 | 0.00176774 | 0.115 | 303.334       | 0.117 | 0.993535076 | 0.065 | 1            | 4.8E-14                | 3   | APR   | 2015 | 11   | 48  | 1      | 14-OSU-07   | 0.00  | 0.00  | 33.92   |  |  |  |  |
| 15D10343                    | 21.7 % | 1180043-1a | Groundmass | Kerguelen Plateau | Dan Miggins | 21.7 | FCT-NM (7B24-14) | 28.201           | 0.082 | Kuiper et al (2008) | 8.89125            | 0.115 | 0.00176774 | 0.115 | 303.334       | 0.117 | 0.993535076 | 0.065 | 1            | 4.8E-14                | 3   | APR   | 2015 | 12   | 1   | 1      | 14-OSU-07   | 0.00  | 0.00  | 33.92   |  |  |  |  |
| 15D10344                    | 22.8 % | 1180043-1a | Groundmass | Kerguelen Plateau | Dan Miggins | 22.8 | FCT-NM (7B24-14) | 28.201           | 0.082 | Kuiper et al (2008) | 8.89125            | 0.115 | 0.00176774 | 0.115 | 303.334       | 0.117 | 0.993535076 | 0.065 | 1            | 4.8E-14                | 3   | APR   | 2015 | 12   | 14  | 1      | 14-OSU-07   | 0.00  | 0.00  | 33.92   |  |  |  |  |
| 15D10346                    | 24.3 % | 1180043-1a | Groundmass | Kerguelen Plateau | Dan Miggins | 24.3 | FCT-NM (7B24-14) | 28.201           | 0.082 | Kuiper et al (2008) | 8.89125            | 0.115 | 0.00176774 | 0.115 | 303.334       | 0.117 | 0.993535076 | 0.065 | 1            | 4.8E-14                | 3   | APR   | 2015 | 12   | 39  | 1      | 14-OSU-07   | 0.00  | 0.00  | 33.92   |  |  |  |  |



[illegible]



| OSU Argon Geochronology Lab |          |       |          |       |          |        |          |       |           |          |           |           |           |          |          |         |          |         |           |     |      |      |      |     |       |     |   |
|-----------------------------|----------|-------|----------|-------|----------|--------|----------|-------|-----------|----------|-----------|-----------|-----------|----------|----------|---------|----------|---------|-----------|-----|------|------|------|-----|-------|-----|---|
| Irradiation<br>Constants    |          |       |          |       |          |        |          |       |           |          |           |           |           |          |          |         |          |         |           |     |      |      |      |     |       |     |   |
|                             | 40/36(a) | %1σ   | 40/36(c) | %1σ   | 38/36(a) | %1σ    | 38/36(c) | %1σ   | 39/37(ca) | %1σ      | 38/37(ca) | %1σ       | 36/37(ca) | %1σ      | 40/39(k) | %1σ     | 38/39(k) | %1σ     | 36/38(cl) | %1σ | K/Ca | %1σ  | K/Cl | %1σ | Ca/Cl | %1σ |   |
| 15D10306                    | 2.0 %    | 295.5 | 0        | 0.018 | 35       | 0.1869 | 0        | 1.493 | 3         | 0.000673 | 0         | 0.0000139 | 0         | 0.000264 | 0        | 0.00101 | 0        | 0.01138 | 0         | 0   | 0    | 0.43 | 0    | 0   | 0     | 0   | 0 |
| 15D10308                    | 2.2 %    | 295.5 | 0        | 0.018 | 35       | 0.1869 | 0        | 1.493 | 3         | 0.000673 | 0         | 0.0000139 | 0         | 0.000264 | 0        | 0.00101 | 0        | 0.01138 | 0         | 0   | 0    | 0.43 | 0    | 0   | 0     | 0   | 0 |
| 15D10309                    | 2.4 %    | 295.5 | 0        | 0.018 | 35       | 0.1869 | 0        | 1.493 | 3         | 0.000673 | 0         | 0.0000139 | 0         | 0.000264 | 0        | 0.00101 | 0        | 0.01138 | 0         | 0   | 0    | 0.43 | 0    | 0   | 0     | 0   | 0 |
| 15D10310                    | 2.6 %    | 295.5 | 0        | 0.018 | 35       | 0.1869 | 0        | 1.493 | 3         | 0.000673 | 0         | 0.0000139 | 0         | 0.000264 | 0        | 0.00101 | 0        | 0.01138 | 0         | 0   | 0    | 0.43 | 0    | 0   | 0     | 0   | 0 |
| 15D10312                    | 2.8 %    | 295.5 | 0        | 0.018 | 35       | 0.1869 | 0        | 1.493 | 3         | 0.000673 | 0         | 0.0000139 | 0         | 0.000264 | 0        | 0.00101 | 0        | 0.01138 | 0         | 0   | 0    | 0.43 | 0    | 0   | 0     | 0   | 0 |
| 15D10313                    | 3.0 %    | 295.5 | 0        | 0.018 | 35       | 0.1869 | 0        | 1.493 | 3         | 0.000673 | 0         | 0.0000139 | 0         | 0.000264 | 0        | 0.00101 | 0        | 0.01138 | 0         | 0   | 0    | 0.43 | 0    | 0   | 0     | 0   | 0 |
| 15D10314                    | 3.3 %    | 295.5 | 0        | 0.018 | 35       | 0.1869 | 0        | 1.493 | 3         | 0.000673 | 0         | 0.0000139 | 0         | 0.000264 | 0        | 0.00101 | 0        | 0.01138 | 0         | 0   | 0    | 0.43 | 0    | 0   | 0     | 0   | 0 |
| 15D10315                    | 3.6 %    | 295.5 | 0        | 0.018 | 35       | 0.1869 | 0        | 1.493 | 3         | 0.000673 | 0         | 0.0000139 | 0         | 0.000264 | 0        | 0.00101 | 0        | 0.01138 | 0         | 0   | 0    | 0.43 | 0    | 0   | 0     | 0   | 0 |
| 15D10317                    | 3.9 %    | 295.5 | 0        | 0.018 | 35       | 0.1869 | 0        | 1.493 | 3         | 0.000673 | 0         | 0.0000139 | 0         | 0.000264 | 0        | 0.00101 | 0        | 0.01138 | 0         | 0   | 0    | 0.43 | 0    | 0   | 0     | 0   | 0 |
| 15D10318                    | 4.3 %    | 295.5 | 0        | 0.018 | 35       | 0.1869 | 0        | 1.493 | 3         | 0.000673 | 0         | 0.0000139 | 0         | 0.000264 | 0        | 0.00101 | 0        | 0.01138 | 0         | 0   | 0    | 0.43 | 0    | 0   | 0     | 0   | 0 |
| 15D10319                    | 4.6 %    | 295.5 | 0        | 0.018 | 35       | 0.1869 | 0        | 1.493 | 3         | 0.000673 | 0         | 0.0000139 | 0         | 0.000264 | 0        | 0.00101 | 0        | 0.01138 | 0         | 0   | 0    | 0.43 | 0    | 0   | 0     | 0   | 0 |
| 15D10320                    | 4.9 %    | 295.5 | 0        | 0.018 | 35       | 0.1869 | 0        | 1.493 | 3         | 0.000673 | 0         | 0.0000139 | 0         | 0.000264 | 0        | 0.00101 | 0        | 0.01138 | 0         | 0   | 0    | 0.43 | 0    | 0   | 0     | 0   | 0 |
| 15D10322                    | 5.2 %    | 295.5 | 0        | 0.018 | 35       | 0.1869 | 0        | 1.493 | 3         | 0.000673 | 0         | 0.0000139 | 0         | 0.000264 | 0        | 0.00101 | 0        | 0.01138 | 0         | 0   | 0    | 0.43 | 0    | 0   | 0     | 0   | 0 |
| 15D10323                    | 5.5 %    | 295.5 | 0        | 0.018 | 35       | 0.1869 | 0        | 1.493 | 3         | 0.000673 | 0         | 0.0000139 | 0         | 0.000264 | 0        | 0.00101 | 0        | 0.01138 | 0         | 0   | 0    | 0.43 | 0    | 0   | 0     | 0   | 0 |
| 15D10324                    | 5.8 %    | 295.5 | 0        | 0.018 | 35       | 0.1869 | 0        | 1.493 | 3         | 0.000673 | 0         | 0.0000139 | 0         | 0.000264 | 0        | 0.00101 | 0        | 0.01138 | 0         | 0   | 0    | 0.43 | 0    | 0   | 0     | 0   | 0 |
| 15D10326                    | 6.1 %    | 295.5 | 0        | 0.018 | 35       | 0.1869 | 0        | 1.493 | 3         | 0.000673 | 0         | 0.0000139 | 0         | 0.000264 | 0        | 0.00101 | 0        | 0.01138 | 0         | 0   | 0    | 0.43 | 0    | 0   | 0     | 0   | 0 |
| 15D10327                    | 6.5 %    | 295.5 | 0        | 0.018 | 35       | 0.1869 | 0        | 1.493 | 3         | 0.000673 | 0         | 0.0000139 | 0         | 0.000264 | 0        | 0.00101 | 0        | 0.01138 | 0         | 0   | 0    | 0.43 | 0    | 0   | 0     | 0   | 0 |
| 15D10328                    | 7.0 %    | 295.5 | 0        | 0.018 | 35       | 0.1869 | 0        | 1.493 | 3         | 0.000673 | 0         | 0.0000139 | 0         | 0.000264 | 0        | 0.00101 | 0        | 0.01138 | 0         | 0   | 0    | 0.43 | 0    | 0   | 0     | 0   | 0 |
| 15D10330                    | 7.6 %    | 295.5 | 0        | 0.018 | 35       | 0.1869 | 0        | 1.493 | 3         | 0.000673 | 0         | 0.0000139 | 0         | 0.000264 | 0        | 0.00101 | 0        | 0.01138 | 0         | 0   | 0    | 0.43 | 0    | 0   | 0     | 0   | 0 |
| 15D10331                    | 8.4 %    | 295.5 | 0        | 0.018 | 35       | 0.1869 | 0        | 1.493 | 3         | 0.000673 | 0         | 0.0000139 | 0         | 0.000264 | 0        | 0.00101 | 0        | 0.01138 | 0         | 0   | 0    | 0.43 | 0    | 0   | 0     | 0   | 0 |
| 15D10332                    | 9.4 %    | 295.5 | 0        | 0.018 | 35       | 0.1869 | 0        | 1.493 | 3         | 0.000673 | 0         | 0.0000139 | 0         | 0.000264 | 0        | 0.00101 | 0        | 0.01138 | 0         | 0   | 0    | 0.43 | 0    | 0   | 0     | 0   | 0 |
| 15D10334                    | 10.5 %   | 295.5 | 0        | 0.018 | 35       | 0.1869 | 0        | 1.493 | 3         | 0.000673 | 0         | 0.0000139 | 0         | 0.000264 | 0        | 0.00101 | 0        | 0.01138 | 0         | 0   | 0    | 0.43 | 0    | 0   | 0     | 0   | 0 |
| 15D10335                    | 11.7 %   | 295.5 | 0        | 0.018 | 35       | 0.1869 | 0        | 1.493 | 3         | 0.000673 | 0         | 0.0000139 | 0         | 0.000264 | 0        | 0.00101 | 0        | 0.01138 | 0         | 0   | 0    | 0.43 | 0    | 0   | 0     | 0   | 0 |
| 15D10336                    | 13.1 %   | 295.5 | 0        | 0.018 | 35       | 0.1869 | 0        | 1.493 | 3         | 0.000673 | 0         | 0.0000139 | 0         | 0.000264 | 0        | 0.00101 | 0        | 0.01138 | 0         | 0   | 0    | 0.43 | 0    | 0   | 0     | 0   | 0 |
| 15D10338                    | 14.7 %   | 295.5 | 0        | 0.018 | 35       | 0.1869 | 0        | 1.493 | 3         | 0.000673 | 0         | 0.0000139 | 0         | 0.000264 | 0        | 0.00101 | 0        | 0.01138 | 0         | 0   | 0    | 0.43 | 0    | 0   | 0     | 0   | 0 |
| 15D10339                    | 16.5 %   | 295.5 | 0        | 0.018 | 35       | 0.1869 | 0        | 1.493 | 3         | 0.000673 | 0         | 0.0000139 | 0         | 0.000264 | 0        | 0.00101 | 0        | 0.01138 | 0         | 0   | 0    | 0.43 | 0    | 0   | 0     | 0   | 0 |
| 15D10340                    | 18.5 %   | 295.5 | 0        | 0.018 | 35       | 0.1869 | 0        | 1.493 | 3         | 0.000673 | 0         | 0.0000139 | 0         | 0.000264 | 0        | 0.00101 | 0        | 0.01138 | 0         | 0   | 0    | 0.43 | 0    | 0   | 0     | 0   | 0 |
| 15D10342                    | 19.8 %   | 295.5 | 0        | 0.018 | 35       | 0.1869 | 0        | 1.493 | 3         | 0.000673 | 0         | 0.0000139 | 0         | 0.000264 | 0        | 0.00101 | 0        | 0.01138 | 0         | 0   | 0    | 0.43 | 0    | 0   | 0     | 0   | 0 |
| 15D10343                    | 21.7 %   | 295.5 | 0        | 0.018 | 35       | 0.1869 | 0        | 1.493 | 3         | 0.000673 | 0         | 0.0000139 | 0         | 0.000264 | 0        | 0.00101 | 0        | 0.01138 | 0         | 0   | 0    | 0.43 | 0    | 0   | 0     | 0   | 0 |
| 15D10344                    | 22.8 %   | 295.5 | 0        | 0.018 | 35       | 0.1869 | 0        | 1.493 | 3         | 0.000673 | 0         | 0.0000139 | 0         | 0.000264 | 0        | 0.00101 | 0        | 0.01138 | 0         | 0   | 0    | 0.43 | 0    | 0   | 0     | 0   | 0 |
| 15D10346                    | 24.3 %   | 295.5 | 0        | 0.018 | 35       | 0.1869 | 0        | 1.493 | 3         | 0.000673 | 0         | 0.0000139 | 0         | 0.000264 | 0        | 0.00101 | 0        | 0.01138 | 0         | 0   | 0    | 0.43 | 0    | 0   | 0     | 0   | 0 |



15D10305.AGE >>> 1180043-1A >>> KERGUELEN | FALLOON (14-PIL-01) PROJECT

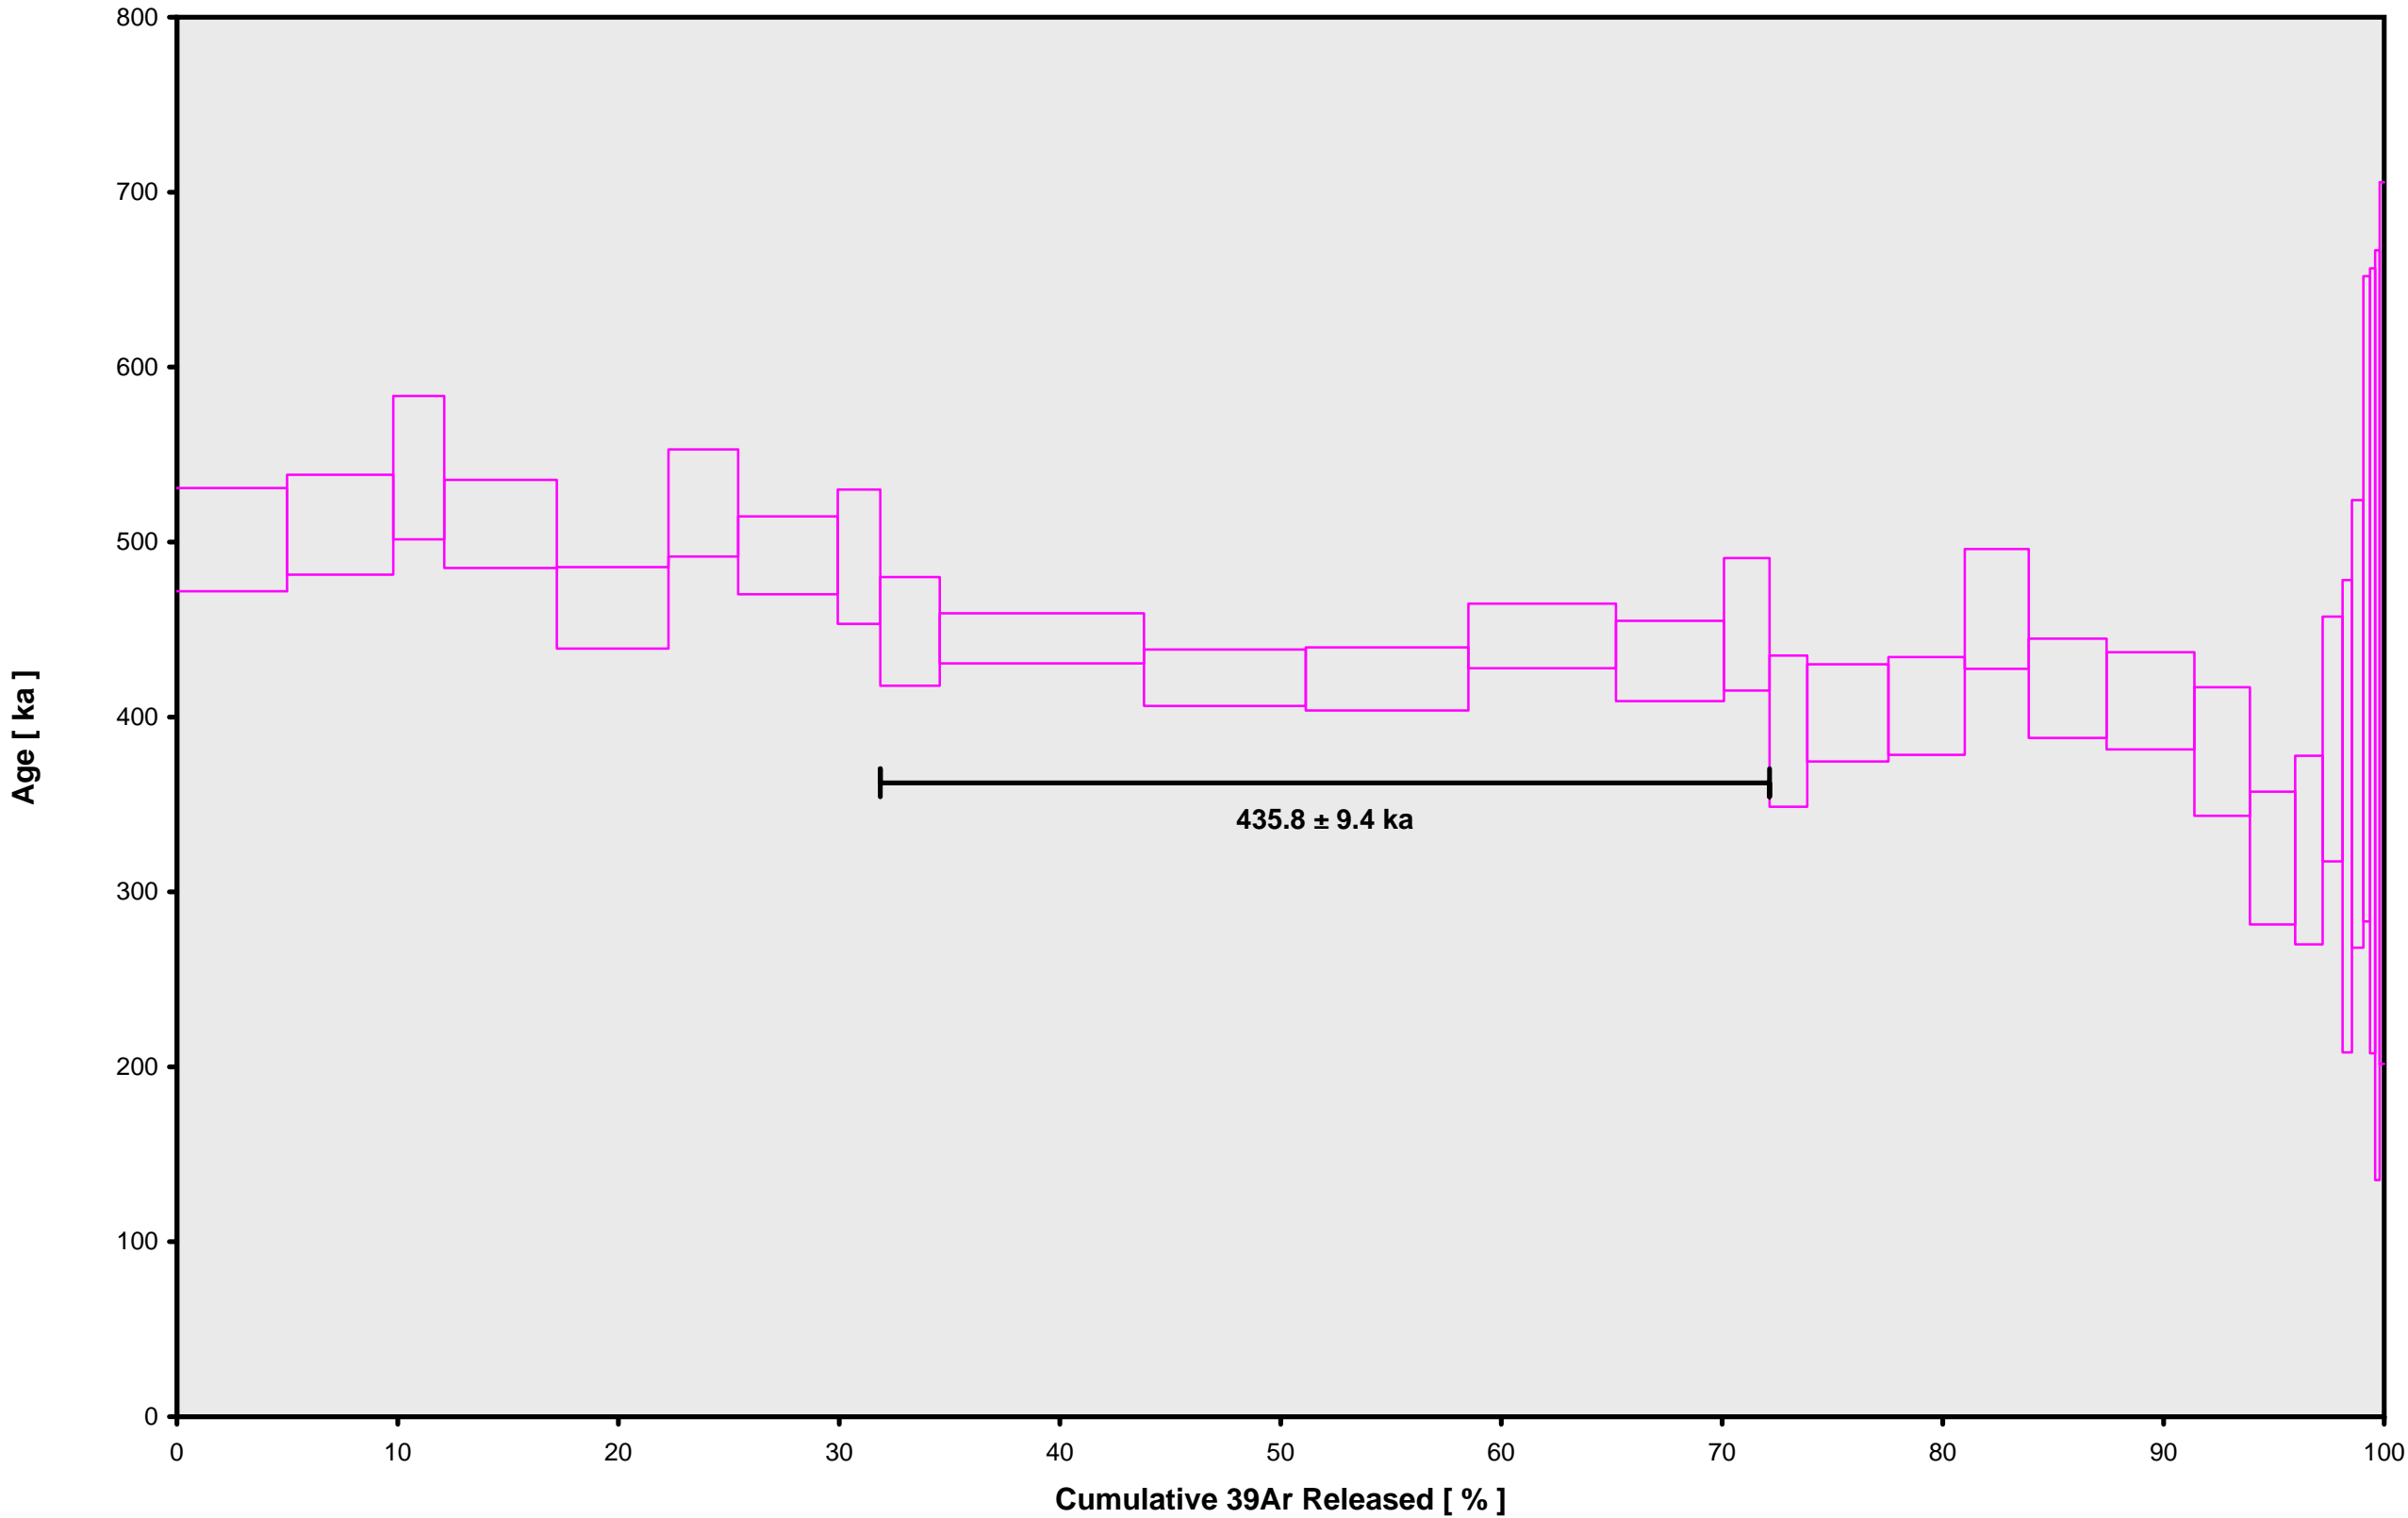

Ar-Ages in ka

WEIGHTED PLATEAU

$435.8 \pm 9.4$

TOTAL FUSION

$446.5 \pm 5.5$

NORMAL ISOCHRON

$421.8 \pm 55.6$

INVERSE ISOCHRON

$422.4 \pm 54.5$

MSWD (PROBABILITY)

1.62 (14%)

Sample Info

Groundmass

Kerguelen Plateau

Dan Miggins

IRR = 14-OSU-07 (7B24-14)

J =  $0.00176774 \pm 0.00000203$



15D10305.AGE >>> 1180043-1A >>> KERGUELEN | FALLOON (14-PIL-01) PROJECT

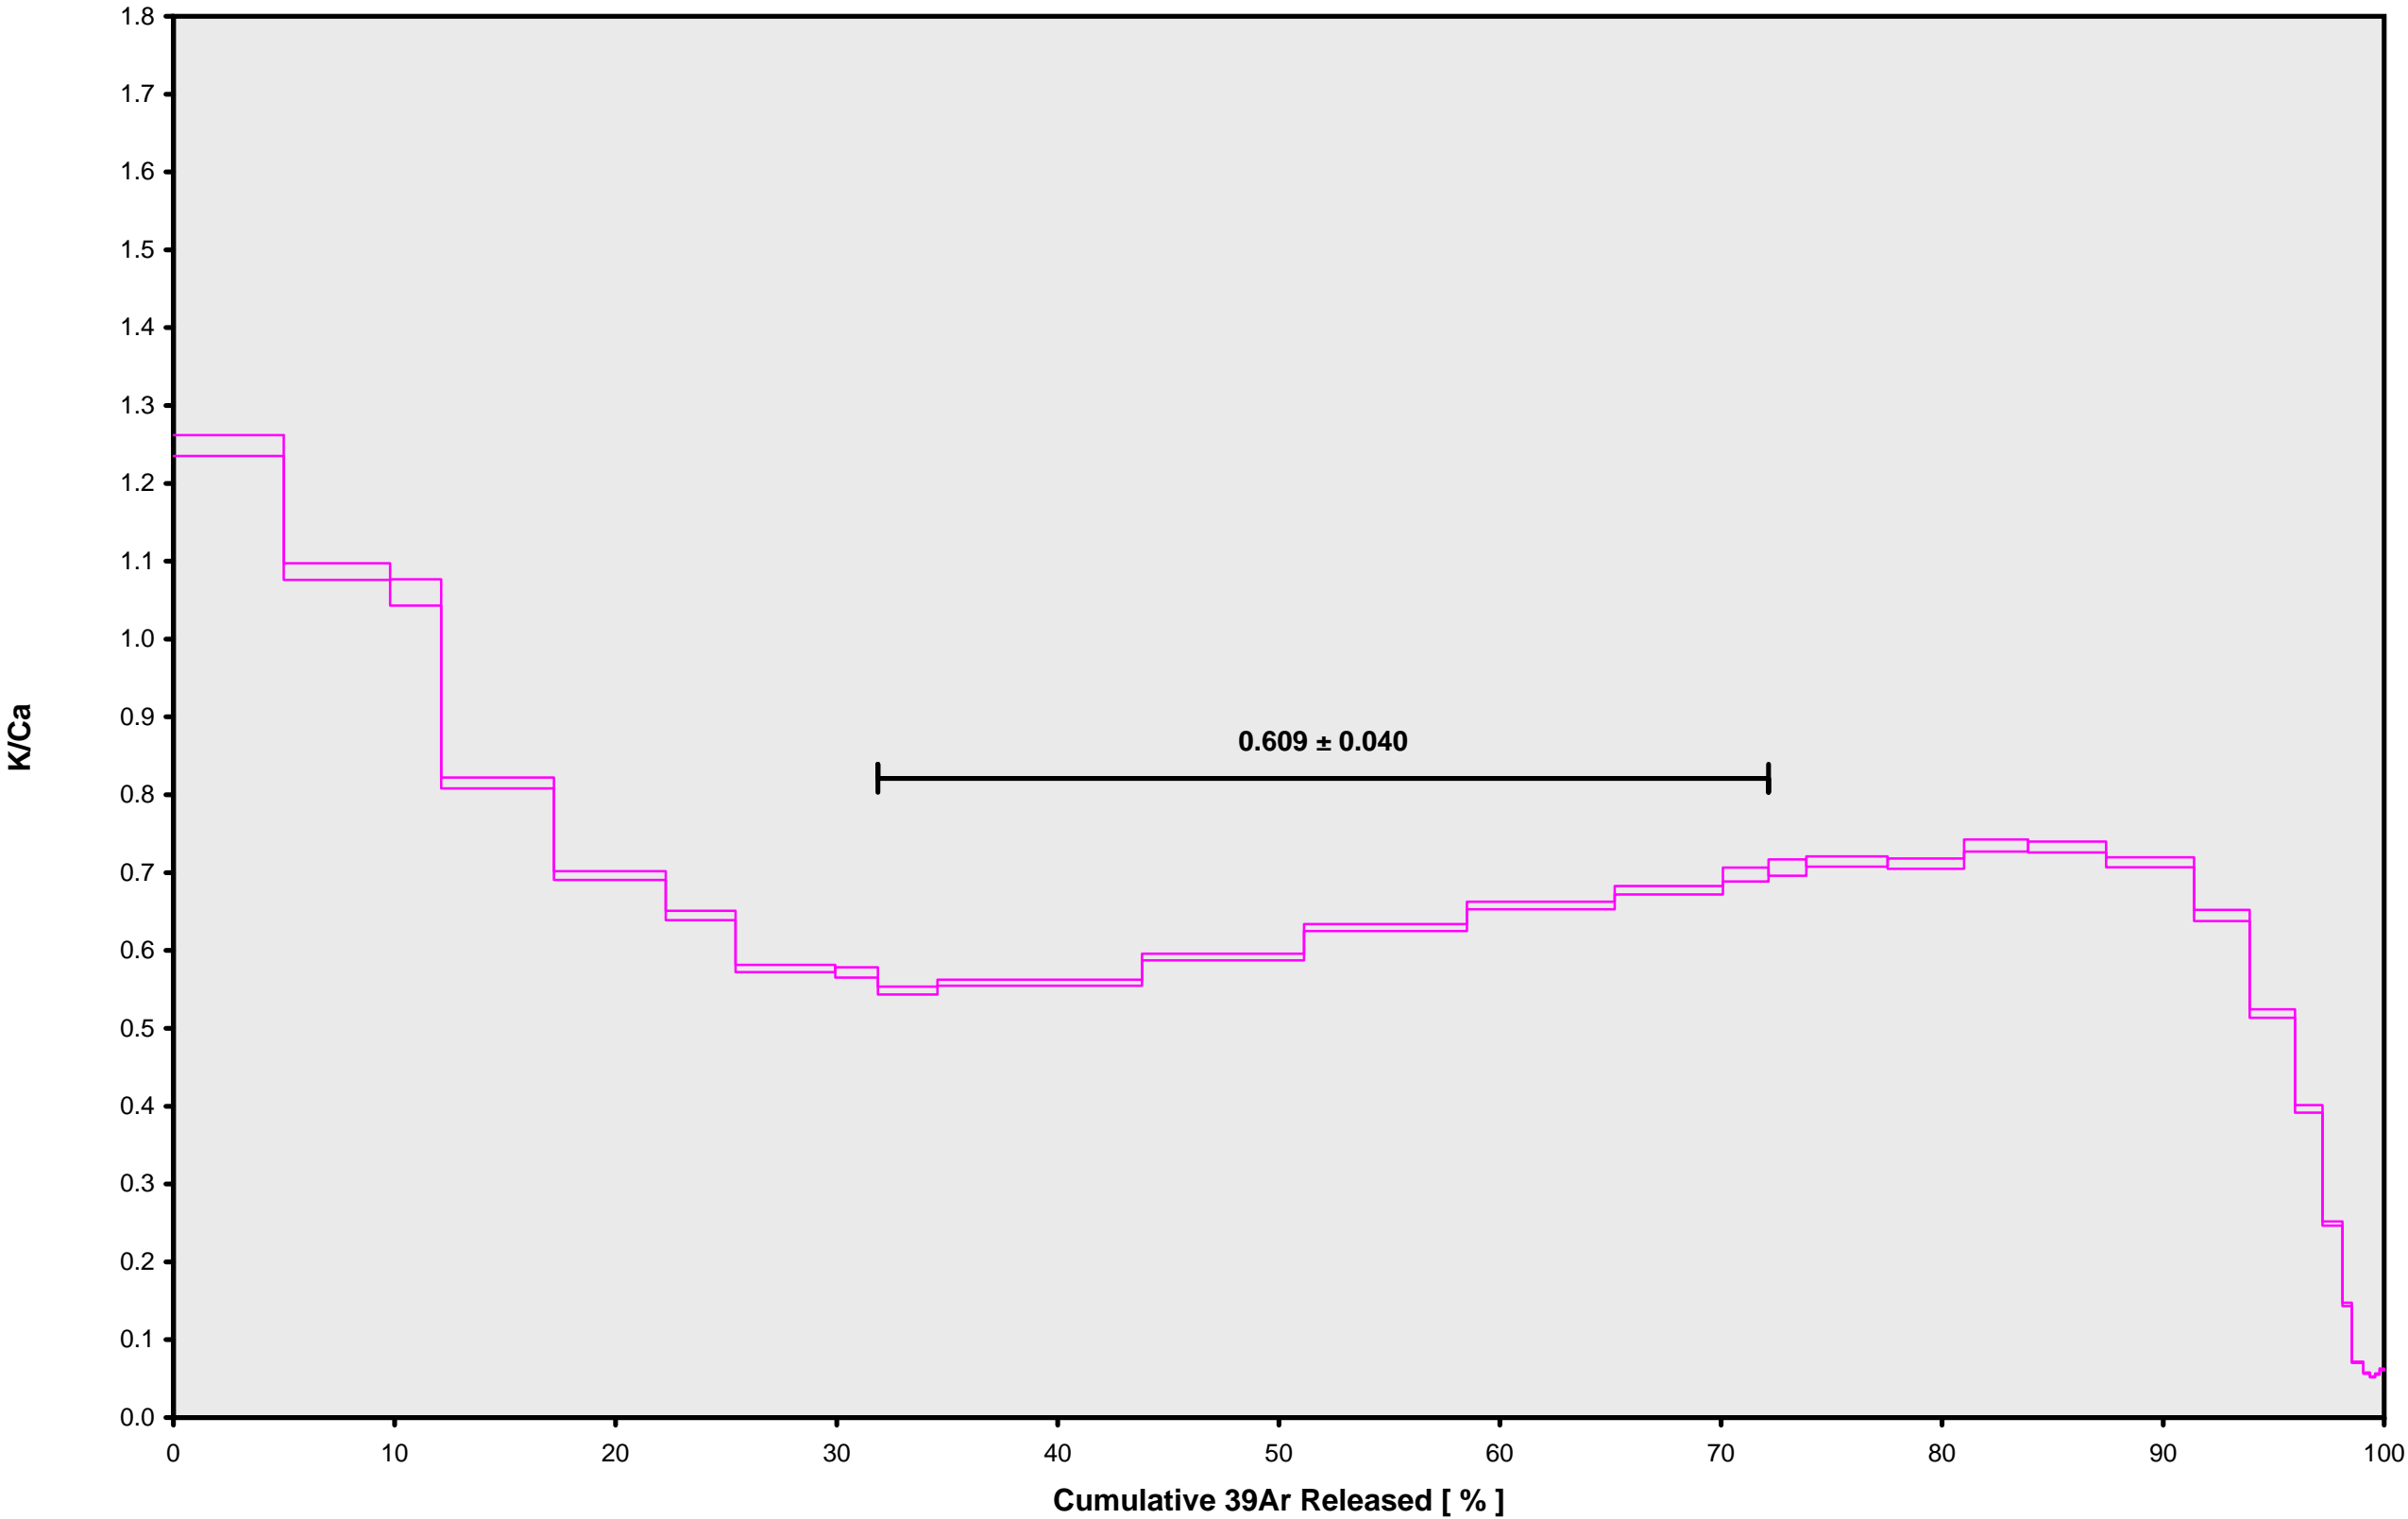

**Ar-Ages in ka**

**WEIGHTED PLATEAU**

435.8  $\pm$  9.4

**TOTAL FUSION**

446.5  $\pm$  5.5

**NORMAL ISOCHRON**

421.8  $\pm$  55.6

**INVERSE ISOCHRON**

422.4  $\pm$  54.5

**Sample Info**

**Groundmass**

Kerguelen Plateau

Dan Miggins

IRR = 14-OSU-07 (7B24-14)

J = 0.00176774  $\pm$  0.00000203



15D10305.AGE >>> 1180043-1A >>> KERGUELEN | FALLOON (14-PIL-01) PROJECT

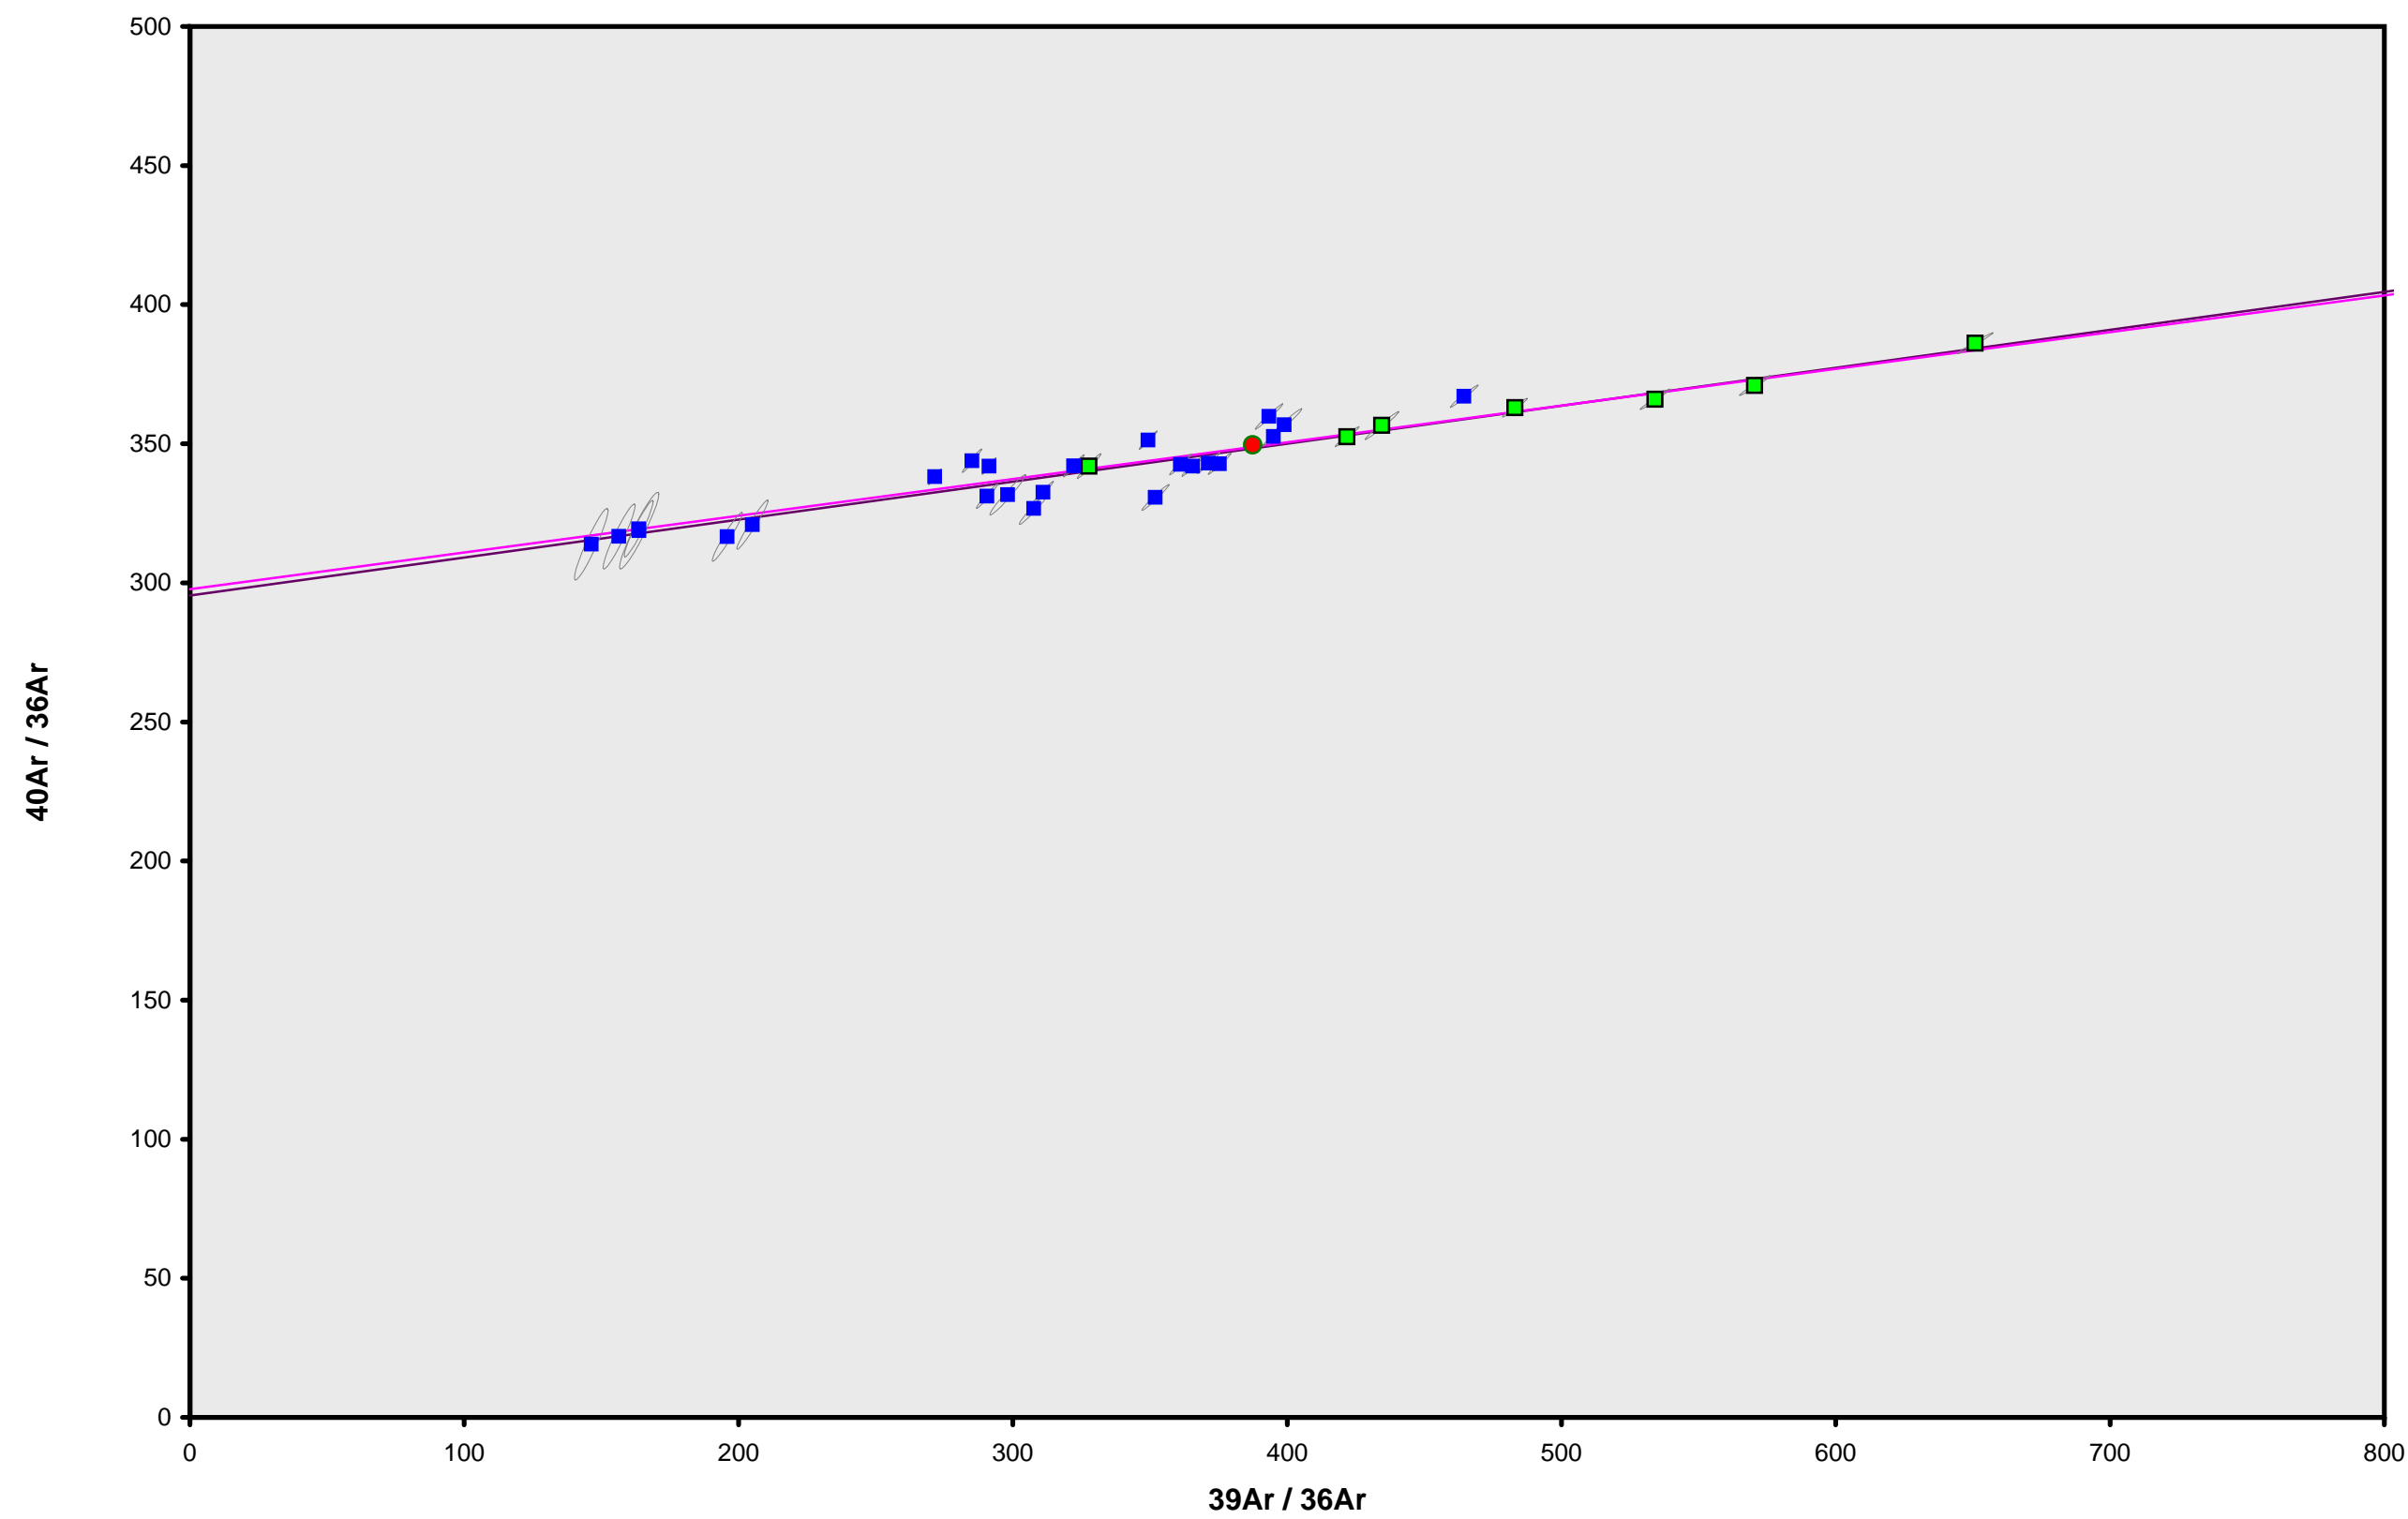

**Ar-Ages in ka**

**WEIGHTED PLATEAU**  
 $435.8 \pm 9.4$

**TOTAL FUSION**  
 $446.5 \pm 5.5$

**NORMAL ISOCHRON**  
 $421.8 \pm 55.6$

**INVERSE ISOCHRON**  
 $422.4 \pm 54.5$

**MSWD (PROBABILITY)**  
1.86 (10%)

**40AR/36AR INTERCEPT**  
 $297.8 \pm 9.0$

**Sample Info**

Groundmass  
Kerguelen Plateau  
Dan Miggins

IRR = 14-OSU-07 (7B24-14)  
J =  $0.00176774 \pm 0.00000203$



15D10305.AGE >>> 1180043-1A >>> KERGUELEN | FALLOON (14-PIL-01) PROJECT

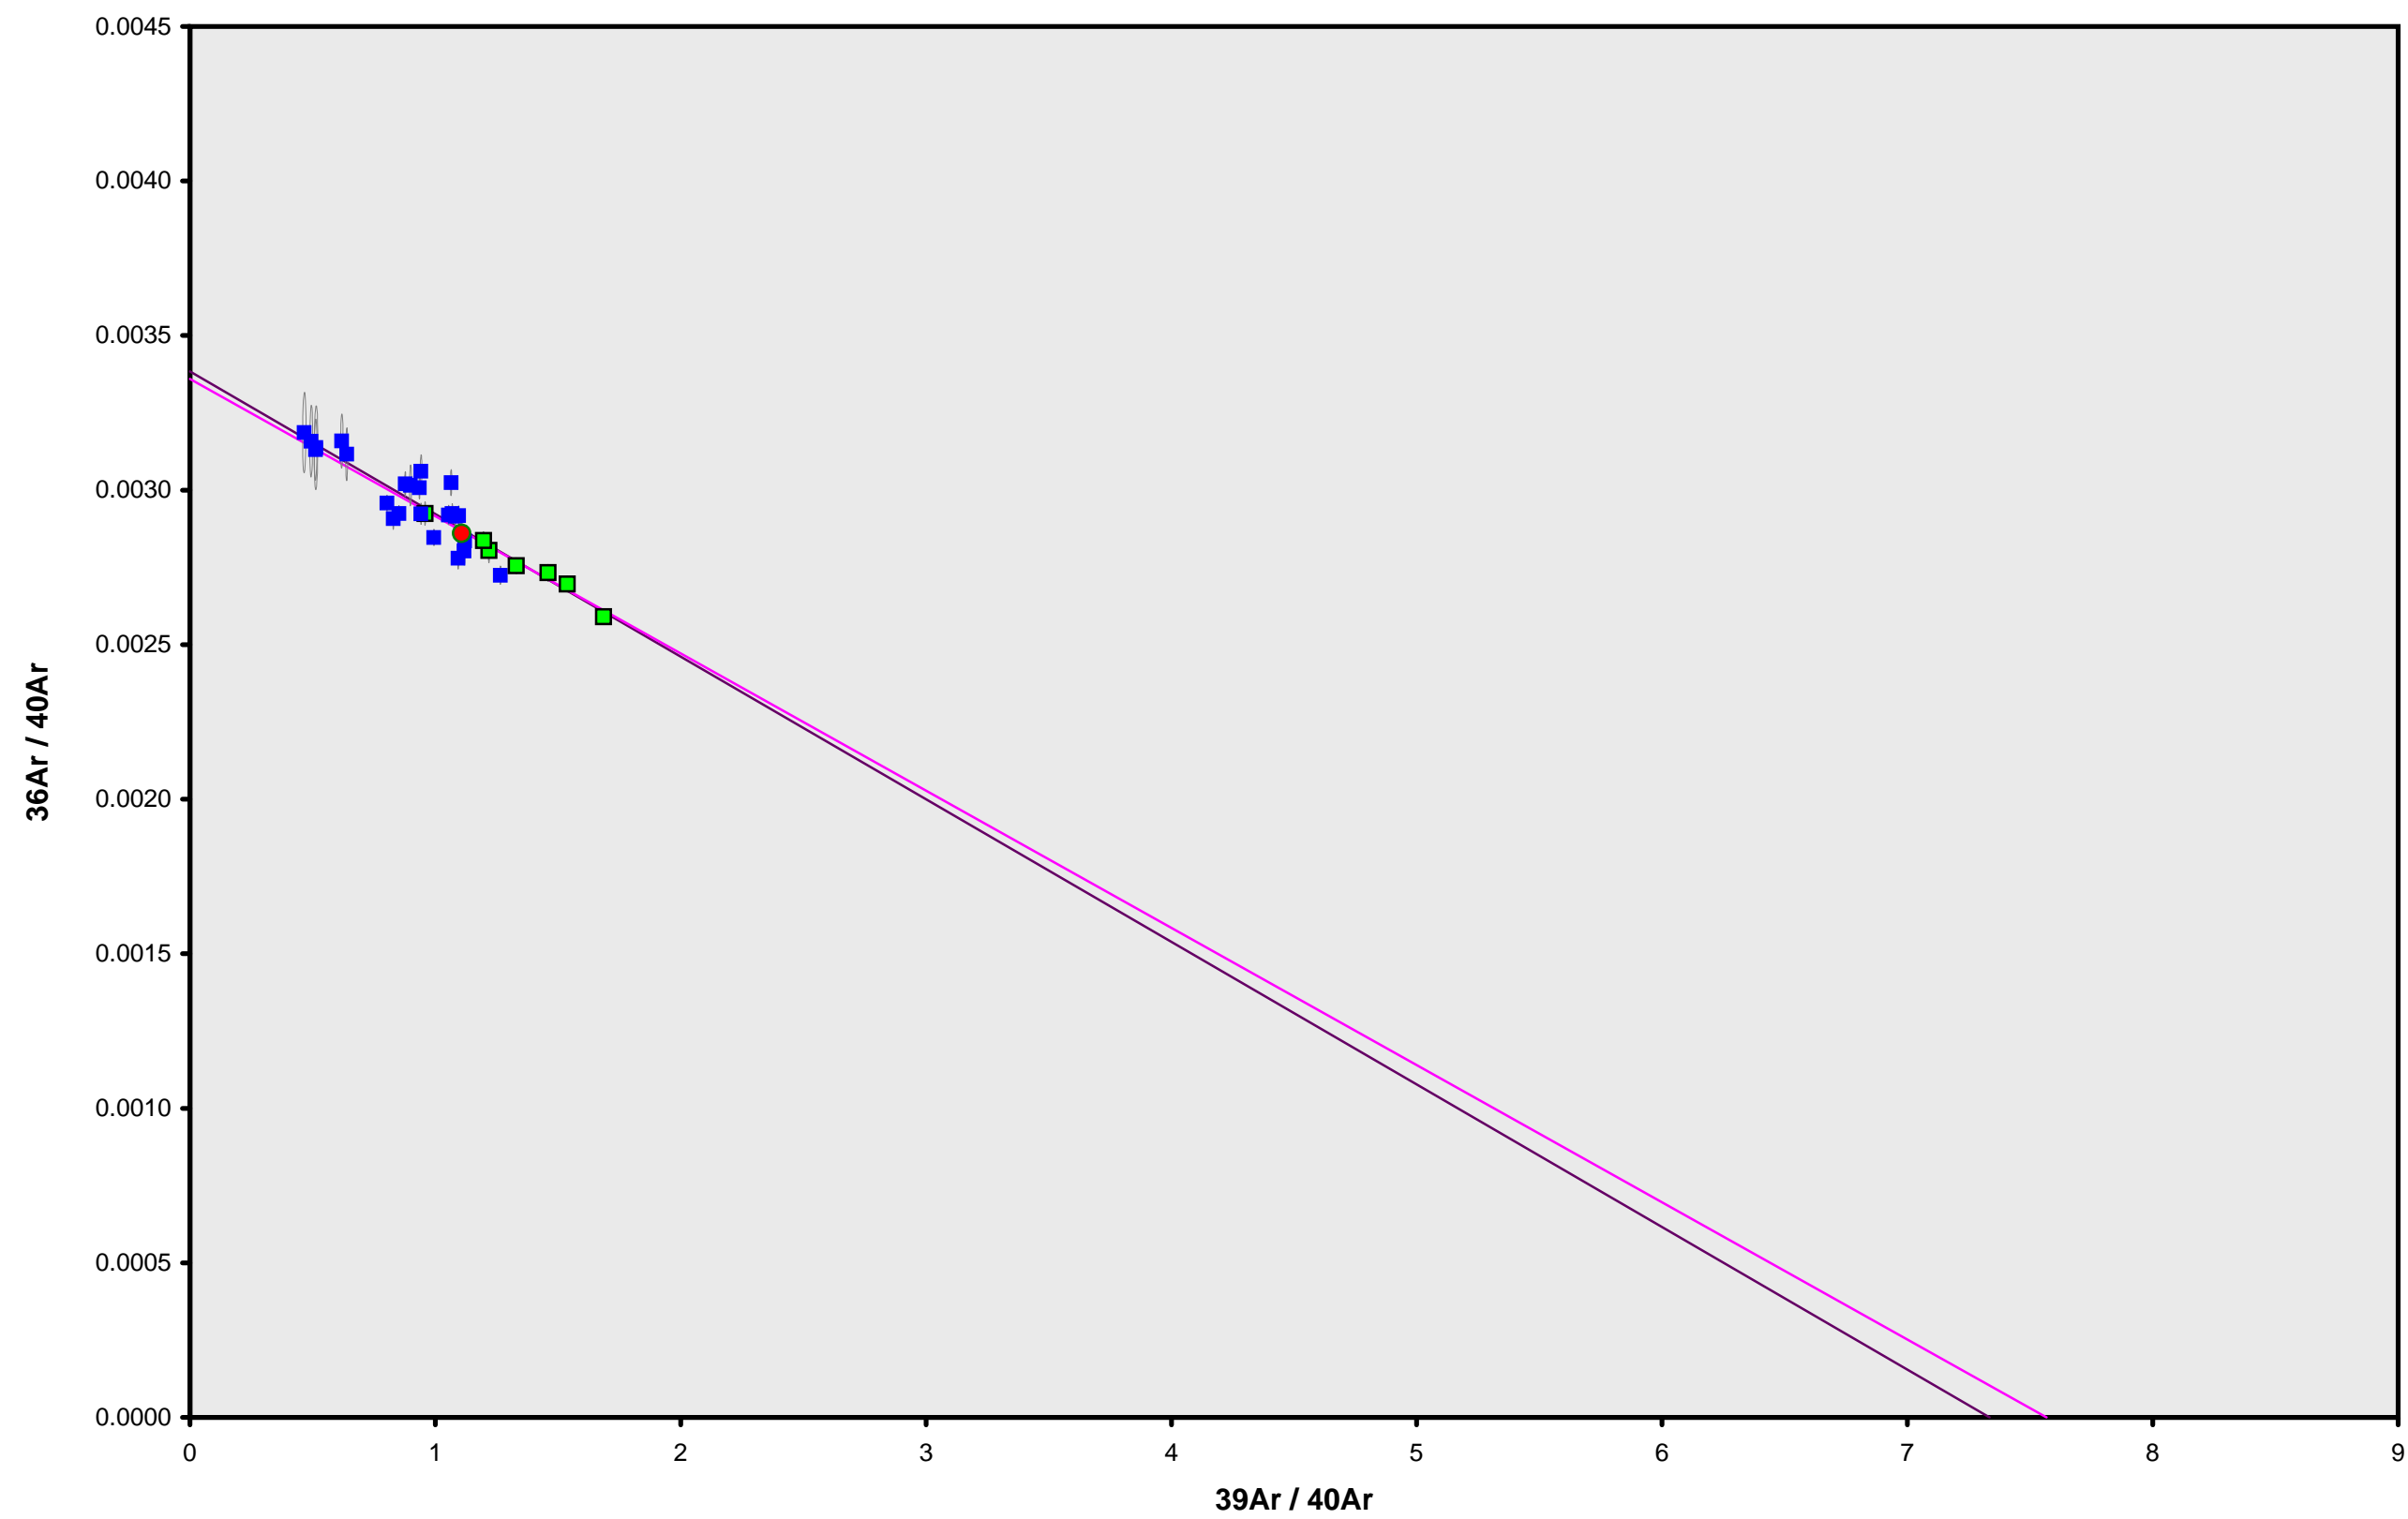

**Ar-Ages in ka**

**WEIGHTED PLATEAU**  
435.8 ± 9.4

**TOTAL FUSION**  
446.5 ± 5.5

**NORMAL ISOCHRON**  
421.8 ± 55.6

**INVERSE ISOCHRON**  
422.4 ± 54.5

**MSWD (PROBABILITY)**  
1.85 (10%)

**SPREADING FACTOR**  
9.6%

**40AR/36AR INTERCEPT**  
297.7 ± 8.9

**Sample Info**

Groundmass  
Kerguelen Plateau  
Dan Miggins

IRR = 14-OSU-07 (7B24-14)  
J = 0.00176774 ± 0.00000203



| Incremental Heating |         | 36Ar(a)<br>[fA] | 37Ar(ca)<br>[fA] | 38Ar(cl)<br>[fA] | 39Ar(k)<br>[fA] | 40Ar(r)<br>[fA] | Age ± 2σ<br>(ka) | 40Ar(r)<br>(%) | 39Ar(k)<br>(%) | K/Ca ± 2σ   |
|---------------------|---------|-----------------|------------------|------------------|-----------------|-----------------|------------------|----------------|----------------|-------------|
| 15D10264            | 2.0 %   | 0.0457977       | 14.0806          | 0.0000000        | 30.3935         | 2.90675         | 303.6 ± 54.2     | 17.65          | 0.59           | 0.93 ± 0.04 |
| 15D10266            | 2.2 %   | 0.0496676       | 20.3661          | 0.0000000        | 45.2003         | 3.69857         | 259.7 ± 36.1     | 20.08          | 0.88           | 0.95 ± 0.03 |
| 15D10267            | 2.4 % ✓ | 0.0398951       | 22.3244          | 0.0000000        | 50.2095         | 4.89719         | 309.6 ± 31.0     | 29.26          | 0.97           | 0.97 ± 0.02 |
| 15D10268            | 2.6 % ✓ | 0.0508406       | 38.9151          | 0.0134878        | 88.6011         | 8.38786         | 300.5 ± 17.8     | 35.69          | 1.72           | 0.98 ± 0.02 |
| 15D10270            | 2.8 % ✓ | 0.0458148       | 42.6808          | 0.0000000        | 97.6178         | 9.00573         | 292.8 ± 17.1     | 39.77          | 1.89           | 0.98 ± 0.01 |
| 15D10271            | 3.0 % ✓ | 0.0630154       | 82.9798          | 0.0000000        | 191.3670        | 17.90117        | 296.9 ± 10.0     | 48.76          | 3.71           | 0.99 ± 0.01 |
| 15D10272            | 3.3 % ✓ | 0.0552142       | 96.2102          | 0.0919541        | 216.7844        | 20.02846        | 293.3 ± 7.9      | 54.78          | 4.20           | 0.97 ± 0.01 |
| 15D10273            | 3.6 % ✓ | 0.0695274       | 170.8129         | 0.1082873        | 365.5183        | 33.70987        | 292.8 ± 5.9      | 61.71          | 7.09           | 0.92 ± 0.01 |
| 15D10275            | 3.9 % ✓ | 0.0556862       | 196.0006         | 0.1935478        | 398.1297        | 36.66736        | 292.4 ± 5.1      | 68.51          | 7.72           | 0.87 ± 0.01 |
| 15D10276            | 4.3 % ✓ | 0.0427566       | 183.9084         | 0.1443996        | 371.3344        | 33.89554        | 289.8 ± 4.9      | 72.26          | 7.20           | 0.87 ± 0.01 |
| 15D10277            | 4.6 % ✓ | 0.0351311       | 174.5698         | 0.1505054        | 354.6551        | 32.76211        | 293.2 ± 4.9      | 75.31          | 6.88           | 0.87 ± 0.01 |
| 15D10278            | 4.9 % ✓ | 0.0459863       | 215.0328         | 0.1807852        | 476.4354        | 43.19016        | 287.8 ± 4.2      | 75.43          | 9.24           | 0.95 ± 0.01 |
| 15D10280            | 5.2 % ✓ | 0.0233926       | 105.5285         | 0.1153430        | 259.4208        | 23.40398        | 286.4 ± 6.0      | 76.54          | 5.03           | 1.06 ± 0.01 |
| 15D10281            | 5.5 % ✓ | 0.0312221       | 106.0083         | 0.1130173        | 295.6016        | 26.77489        | 287.5 ± 5.7      | 73.76          | 5.73           | 1.20 ± 0.01 |
| 15D10282            | 5.8 % ✓ | 0.0240036       | 68.5335          | 0.0884786        | 207.2704        | 18.50977        | 283.5 ± 7.5      | 71.71          | 4.02           | 1.30 ± 0.01 |
| 15D10284            | 6.1 % ✓ | 0.0201914       | 53.5145          | 0.1054097        | 168.8099        | 15.46345        | 290.8 ± 9.7      | 71.59          | 3.27           | 1.36 ± 0.02 |
| 15D10285            | 6.5 % ✓ | 0.0186194       | 38.9893          | 0.0937517        | 125.8593        | 11.34457        | 286.1 ± 12.2     | 66.84          | 2.44           | 1.39 ± 0.02 |
| 15D10286            | 7.0 % ✓ | 0.0178366       | 35.4040          | 0.0375439        | 112.7676        | 10.28686        | 289.6 ± 12.8     | 65.64          | 2.19           | 1.37 ± 0.02 |
| 15D10288            | 7.6 %   | 0.0257171       | 40.6988          | 0.0398233        | 128.5427        | 11.37721        | 281.0 ± 12.0     | 59.55          | 2.49           | 1.36 ± 0.02 |
| 15D10289            | 8.4 %   | 0.0316679       | 44.3257          | 0.0890785        | 132.5798        | 11.75139        | 281.4 ± 11.5     | 55.32          | 2.57           | 1.29 ± 0.02 |
| 15D10290            | 9.4 %   | 0.0447427       | 54.7556          | 0.1605658        | 151.1543        | 12.83114        | 269.5 ± 11.2     | 48.96          | 2.93           | 1.19 ± 0.01 |
| 15D10292            | 10.5 %  | 0.0523767       | 65.9883          | 0.0971028        | 168.5717        | 15.06254        | 283.6 ± 10.9     | 49.05          | 3.27           | 1.10 ± 0.01 |
| 15D10293            | 11.7 %  | 0.0561251       | 65.8530          | 0.1136958        | 152.3421        | 13.53974        | 282.1 ± 11.8     | 44.72          | 2.95           | 0.99 ± 0.01 |
| 15D10294            | 13.1 %  | 0.0699753       | 71.4246          | 0.1424193        | 145.1311        | 12.68760        | 277.5 ± 12.6     | 37.86          | 2.81           | 0.87 ± 0.01 |
| 15D10296            | 14.7 %  | 0.0914593       | 89.1971          | 0.1676717        | 140.7729        | 11.35400        | 256.0 ± 14.1     | 29.47          | 2.73           | 0.68 ± 0.01 |
| 15D10297            | 16.5 %  | 0.1174628       | 172.9888         | 0.1919779        | 127.4757        | 10.38748        | 258.7 ± 18.2     | 22.97          | 2.47           | 0.32 ± 0.00 |
| 15D10298            | 18.5 %  | 0.1059276       | 156.1201         | 0.1724475        | 66.8514         | 5.19720         | 246.8 ± 33.8     | 14.21          | 1.30           | 0.18 ± 0.00 |
| 15D10300            | 19.8 %  | 0.0734308       | 110.0259         | 0.0812575        | 35.1546         | 3.42160         | 309.0 ± 59.3     | 13.60          | 0.68           | 0.14 ± 0.00 |
| 15D10301            | 21.7 %  | 0.0638844       | 108.4815         | 0.0709951        | 22.9720         | 1.97638         | 273.1 ± 83.0     | 9.47           | 0.45           | 0.09 ± 0.00 |
| 15D10302            | 22.8 %  | 0.0498391       | 78.7754          | 0.0095448        | 15.3873         | 1.16369         | 240.1 ± 114.1    | 7.32           | 0.30           | 0.08 ± 0.00 |
| 15D10304            | 24.3 %  | 0.0468676       | 84.1040          | 0.0906107        | 12.7658         | 1.15031         | 286.0 ± 137.9    | 7.66           | 0.25           | 0.07 ± 0.00 |
| Σ                   |         | 1.5640747       | 2808.5982        | 2.8637020        | 5155.6775       | 464.73458       |                  |                |                |             |

| Information on Analysis             | Results          | 40(r)/39(k) ± 2σ          | Age ± 2σ<br>(ka)          | MSWD   | 39Ar(k)<br>(%,n)    | K/Ca ± 2σ   |
|-------------------------------------|------------------|---------------------------|---------------------------|--------|---------------------|-------------|
| Sample = 154-1                      | Age Plateau      | 0.09139 ± 0.00056 ± 0.61% | 290.1 ± 1.9 ± 0.65%       | 1.07   | 73.32               | 0.97 ± 0.07 |
| Material = Groundmass               |                  |                           |                           | 38%    | 16                  |             |
| Location = Kerguelen Plateau        |                  |                           |                           | 1.73   | 2σ Confidence Limit |             |
| Analyst = Dan Miggins               | Total Fusion Age |                           |                           | 1.0322 | Error Magnification |             |
| Project = KERGUELEN   FALLOON (14-I |                  |                           |                           |        |                     |             |
| Mass Discrimination Law = LIN       |                  |                           |                           |        |                     |             |
| Irradiation = 14-OSU-07 (7B26-14)   |                  | 0.09014 ± 0.00061 ± 0.68% | 286.1 ± 2.0 ± 0.72%       |        | 31                  | 0.79 ± 0.00 |
| J = 0.00175554 ± 0.00000202         |                  |                           | Full External Error ± 6.8 |        |                     |             |
| FCT-NM = 28.201 ± 0.023 Ma          |                  |                           | Analytical Error ± 1.9    |        |                     |             |



| Normal Isochron |        | 39(k)/36(a) ± 2σ |                   | 40(a+r)/36(a) ± 2σ | r.i.   |
|-----------------|--------|------------------|-------------------|--------------------|--------|
| 15D10264        | 2.0 %  |                  | 663.65 ± 23.85    | 358.97 ± 13.48     | 0.9499 |
| 15D10266        | 2.2 %  |                  | 910.06 ± 29.80    | 369.97 ± 12.65     | 0.9530 |
| 15D10267        | 2.4 %  | ✓                | 1258.54 ± 48.48   | 418.25 ± 16.75     | 0.9591 |
| 15D10268        | 2.6 %  | ✓                | 1742.73 ± 53.67   | 460.48 ± 14.62     | 0.9667 |
| 15D10270        | 2.8 %  | ✓                | 2130.71 ± 77.58   | 492.07 ± 18.34     | 0.9748 |
| 15D10271        | 3.0 %  | ✓                | 3036.83 ± 93.49   | 579.58 ± 18.07     | 0.9854 |
| 15D10272        | 3.3 %  | ✓                | 3926.25 ± 121.97  | 658.24 ± 20.70     | 0.9858 |
| 15D10273        | 3.6 %  | ✓                | 5257.18 ± 167.36  | 780.34 ± 24.97     | 0.9932 |
| 15D10275        | 3.9 %  | ✓                | 7149.52 ± 264.90  | 953.96 ± 35.49     | 0.9948 |
| 15D10276        | 4.3 %  | ✓                | 8684.84 ± 374.92  | 1088.26 ± 47.16    | 0.9952 |
| 15D10277        | 4.6 %  | ✓                | 10095.20 ± 501.92 | 1228.07 ± 61.26    | 0.9959 |
| 15D10278        | 4.9 %  | ✓                | 10360.37 ± 452.95 | 1234.70 ± 54.11    | 0.9967 |
| 15D10280        | 5.2 %  | ✓                | 11089.86 ± 733.30 | 1295.99 ± 86.04    | 0.9955 |
| 15D10281        | 5.5 %  | ✓                | 9467.71 ± 511.20  | 1153.06 ± 62.52    | 0.9952 |
| 15D10282        | 5.8 %  | ✓                | 8634.96 ± 547.76  | 1066.62 ± 68.09    | 0.9933 |
| 15D10284        | 6.1 %  | ✓                | 8360.50 ± 671.56  | 1061.34 ± 85.74    | 0.9940 |
| 15D10285        | 6.5 %  | ✓                | 6759.58 ± 549.00  | 904.79 ± 74.14     | 0.9908 |
| 15D10286        | 7.0 %  | ✓                | 6322.27 ± 499.59  | 872.23 ± 69.69     | 0.9887 |
| 15D10288        | 7.6 %  |                  | 4998.34 ± 294.45  | 737.90 ± 44.05     | 0.9862 |
| 15D10289        | 8.4 %  |                  | 4186.57 ± 198.65  | 666.58 ± 32.15     | 0.9830 |
| 15D10290        | 9.4 %  |                  | 3378.30 ± 127.06  | 582.28 ± 22.28     | 0.9815 |
| 15D10292        | 10.5 % |                  | 3218.45 ± 114.19  | 583.08 ± 20.97     | 0.9847 |
| 15D10293        | 11.7 % |                  | 2714.33 ± 87.80   | 536.74 ± 17.66     | 0.9814 |
| 15D10294        | 13.1 % |                  | 2074.03 ± 54.79   | 476.82 ± 12.86     | 0.9763 |
| 15D10296        | 14.7 % |                  | 1539.19 ± 34.16   | 419.64 ± 9.51      | 0.9748 |
| 15D10297        | 16.5 % |                  | 1085.24 ± 22.15   | 383.93 ± 7.97      | 0.9775 |
| 15D10298        | 18.5 % |                  | 631.11 ± 13.88    | 344.56 ± 7.76      | 0.9697 |
| 15D10300        | 19.8 % |                  | 478.74 ± 13.98    | 342.10 ± 10.26     | 0.9648 |
| 15D10301        | 21.7 % |                  | 359.59 ± 10.98    | 326.44 ± 10.29     | 0.9500 |
| 15D10302        | 22.8 % |                  | 308.74 ± 11.08    | 318.85 ± 11.88     | 0.9383 |
| 15D10304        | 24.3 % |                  | 272.38 ± 10.45    | 320.04 ± 12.71     | 0.9357 |

| Results         | 40(a)/36(a) ± 2σ      |        | 40(r)/39(k) ± 2σ          | Age ± 2σ (ka)       | MSWD |
|-----------------|-----------------------|--------|---------------------------|---------------------|------|
| Normal Isochron | 304.49 ± 6.63 ± 2.18% |        | 0.09008 ± 0.00108 ± 1.20% | 285.9 ± 3.5 ± 1.23% | 0.61 |
|                 |                       |        | Full External Error ± 7.3 |                     |      |
|                 |                       |        | Analytical Error ± 3.4    |                     |      |
| Statistics      | 2σ Confidence Limit   | 1.76   | Convergence               | 0.000000787330      |      |
|                 | Error Magnification   | 1.0000 | Number of Iterations      | 20                  |      |
|                 | Number of Data Points | 16     | Calculated Line           | Weighted York-2     |      |



| Inverse Isochron |        | 39(k)/40(a+r) ± 2σ |                       | 36(a)/40(a+r) ± 2σ      | r.i.   |
|------------------|--------|--------------------|-----------------------|-------------------------|--------|
| 15D10264         | 2.0 %  |                    | 1.8487566 ± 0.0216979 | 0.00278575 ± 0.00010459 | 0.2899 |
| 15D10266         | 2.2 %  |                    | 2.4598342 ± 0.0254800 | 0.00270295 ± 0.00009240 | 0.2874 |
| 15D10267         | 2.4 %  | ✓                  | 3.0090463 ± 0.0341101 | 0.00239091 ± 0.00009573 | 0.2728 |
| 15D10268         | 2.6 %  | ✓                  | 3.7845536 ± 0.0307425 | 0.00217163 ± 0.00006897 | 0.2445 |
| 15D10270         | 2.8 %  | ✓                  | 4.3301025 ± 0.0360225 | 0.00203224 ± 0.00007576 | 0.2147 |
| 15D10271         | 3.0 %  | ✓                  | 5.2397452 ± 0.0278091 | 0.00172540 ± 0.00005379 | 0.1582 |
| 15D10272         | 3.3 %  | ✓                  | 5.9647516 ± 0.0315041 | 0.00151920 ± 0.00004778 | 0.1563 |
| 15D10273         | 3.6 %  | ✓                  | 6.7370165 ± 0.0250628 | 0.00128149 ± 0.00004100 | 0.1014 |
| 15D10275         | 3.9 %  | ✓                  | 7.4945383 ± 0.0284118 | 0.00104826 ± 0.00003899 | 0.0894 |
| 15D10276         | 4.3 %  | ✓                  | 7.9805181 ± 0.0336921 | 0.00091890 ± 0.00003982 | 0.0878 |
| 15D10277         | 4.6 %  | ✓                  | 8.2203899 ± 0.0370367 | 0.00081429 ± 0.00004062 | 0.0824 |
| 15D10278         | 4.9 %  | ✓                  | 8.3910316 ± 0.0297409 | 0.00080992 ± 0.00003549 | 0.0697 |
| 15D10280         | 5.2 %  | ✓                  | 8.5570827 ± 0.0536359 | 0.00077161 ± 0.00005123 | 0.0899 |
| 15D10281         | 5.5 %  | ✓                  | 8.2109235 ± 0.0434759 | 0.00086726 ± 0.00004702 | 0.0913 |
| 15D10282         | 5.8 %  | ✓                  | 8.0956024 ± 0.0599082 | 0.00093754 ± 0.00005985 | 0.1118 |
| 15D10284         | 6.1 %  | ✓                  | 7.8772722 ± 0.0696105 | 0.00094220 ± 0.00007612 | 0.1065 |
| 15D10285         | 6.5 %  | ✓                  | 7.4708983 ± 0.0827734 | 0.00110523 ± 0.00009057 | 0.1327 |
| 15D10286         | 7.0 %  | ✓                  | 7.2484117 ± 0.0869927 | 0.00114649 ± 0.00009160 | 0.1477 |
| 15D10288         | 7.6 %  |                    | 6.7737455 ± 0.0668841 | 0.00135520 ± 0.00008090 | 0.1616 |
| 15D10289         | 8.4 %  |                    | 6.2806472 ± 0.0556887 | 0.00150019 ± 0.00007235 | 0.1787 |
| 15D10290         | 9.4 %  |                    | 5.8018912 ± 0.0425097 | 0.00171740 ± 0.00006571 | 0.1837 |
| 15D10292         | 10.5 % |                    | 5.5197271 ± 0.0345773 | 0.00171503 ± 0.00006169 | 0.1652 |
| 15D10293         | 11.7 % |                    | 5.0570464 ± 0.0319506 | 0.00186309 ± 0.00006129 | 0.1822 |
| 15D10294         | 13.1 % |                    | 4.3497623 ± 0.0253852 | 0.00209725 ± 0.00005657 | 0.2028 |
| 15D10296         | 14.7 % |                    | 3.6678508 ± 0.0185344 | 0.00238298 ± 0.00005401 | 0.2041 |
| 15D10297         | 16.5 % |                    | 2.8266542 ± 0.0123898 | 0.00260463 ± 0.00005408 | 0.1854 |
| 15D10298         | 18.5 % |                    | 1.8316065 ± 0.0100735 | 0.00290222 ± 0.00006535 | 0.2154 |
| 15D10300         | 19.8 % |                    | 1.3994431 ± 0.0110398 | 0.00292315 ± 0.00008765 | 0.2288 |
| 15D10301         | 21.7 % |                    | 1.1015523 ± 0.0108605 | 0.00306338 ± 0.00009659 | 0.2567 |
| 15D10302         | 22.8 % |                    | 0.9682927 ± 0.0125111 | 0.00313628 ± 0.00011683 | 0.2775 |
| 15D10304         | 24.3 % |                    | 0.8510719 ± 0.0119653 | 0.00312457 ± 0.00012410 | 0.2712 |

| Results          | 40(a)/36(a) ± 2σ      |        | 40(r)/39(k) ± 2σ                                    | Age ± 2σ (ka)       | MSWD     |
|------------------|-----------------------|--------|-----------------------------------------------------|---------------------|----------|
| Inverse Isochron | 304.30 ± 6.64 ± 2.18% |        | 0.09016 ± 0.00108 ± 1.20%                           | 286.2 ± 3.5 ± 1.23% | 0.61 86% |
|                  |                       |        | Full External Error ± 7.4<br>Analytical Error ± 3.4 |                     |          |
| Statistics       | 2σ Confidence Limit   | 1.76   | Convergence                                         | 0.0165631150        |          |
|                  | Error Magnification   | 1.0000 | Number of Iterations                                | 2                   |          |
|                  | Number of Data Points | 16     | Calculated Line                                     | Weighted York-2     |          |
|                  | Spreading Factor      | 50.0%  |                                                     |                     |          |



| OSU Argon Geochronology Lab |        |            |       |           |       |           |        |           |       |           |       |                   |               |             |             |             |
|-----------------------------|--------|------------|-------|-----------|-------|-----------|--------|-----------|-------|-----------|-------|-------------------|---------------|-------------|-------------|-------------|
| Relative Abundances         |        | 36Ar [fA]  | %1σ   | 37Ar [fA] | %1σ   | 38Ar [fA] | %1σ    | 39Ar [fA] | %1σ   | 40Ar [fA] | %1σ   | 40(r)/39(k) ± 2σ  | Age ± 2σ (ka) | 40Ar(r) (%) | 39Ar(k) (%) | K/Ca ± 2σ   |
| 15D10264                    | 2.0 %  | 0.0495150  | 1.649 | 14.0806   | 2.011 | 0.317904  | 12.159 | 30.4030   | 0.158 | 16.47067  | 0.564 | 0.09564 ± 0.01708 | 303.6 ± 54.2  | 17.65       | 0.59        | 0.93 ± 0.04 |
| 15D10266                    | 2.2 %  | 0.0550442  | 1.468 | 20.3661   | 1.337 | 0.515304  | 7.236  | 45.2140   | 0.118 | 18.42098  | 0.503 | 0.08183 ± 0.01137 | 259.7 ± 36.1  | 20.08       | 0.88        | 0.95 ± 0.03 |
| 15D10267                    | 2.4 %  | ✓0.0457888 | 1.669 | 22.3244   | 1.174 | 0.539825  | 7.156  | 50.2246   | 0.108 | 16.73691  | 0.555 | 0.09753 ± 0.00976 | 309.6 ± 31.0  | 29.26       | 0.97        | 0.97 ± 0.02 |
| 15D10268                    | 2.6 %  | ✓0.0611162 | 1.272 | 38.9151   | 0.794 | 1.031812  | 3.738  | 88.6273   | 0.085 | 23.50073  | 0.396 | 0.09467 ± 0.00562 | 300.5 ± 17.8  | 35.69       | 1.72        | 0.98 ± 0.02 |
| 15D10270                    | 2.8 %  | ✓0.0570825 | 1.453 | 42.6808   | 0.713 | 1.114590  | 3.565  | 97.6465   | 0.081 | 22.64259  | 0.406 | 0.09226 ± 0.00539 | 292.8 ± 17.1  | 39.77       | 1.89        | 0.98 ± 0.01 |
| 15D10271                    | 3.0 %  | ✓0.0849220 | 1.134 | 82.9798   | 0.472 | 2.188174  | 1.678  | 191.4229  | 0.070 | 36.71549  | 0.254 | 0.09354 ± 0.00315 | 296.9 ± 10.0  | 48.76       | 3.71        | 0.99 ± 0.01 |
| 15D10272                    | 3.3 %  | ✓0.0806274 | 1.054 | 96.2102   | 0.434 | 2.570618  | 1.450  | 216.8492  | 0.069 | 36.56321  | 0.253 | 0.09239 ± 0.00249 | 293.3 ± 7.9   | 54.78       | 4.20        | 0.97 ± 0.01 |
| 15D10273                    | 3.6 %  | ✓0.1146382 | 0.954 | 170.8129  | 0.366 | 4.283255  | 0.955  | 365.6333  | 0.067 | 54.62439  | 0.173 | 0.09222 ± 0.00186 | 292.8 ± 5.9   | 61.71       | 7.09        | 0.92 ± 0.01 |
| 15D10275                    | 3.9 %  | ✓0.1074594 | 0.944 | 196.0006  | 0.354 | 4.737395  | 0.827  | 398.2616  | 0.066 | 53.52475  | 0.176 | 0.09210 ± 0.00161 | 292.4 ± 5.1   | 68.51       | 7.72        | 0.87 ± 0.01 |
| 15D10276                    | 4.3 %  | ✓0.0913301 | 0.992 | 183.9084  | 0.361 | 4.380733  | 0.886  | 371.4582  | 0.066 | 46.90516  | 0.199 | 0.09128 ± 0.00156 | 289.8 ± 4.9   | 72.26       | 7.20        | 0.87 ± 0.01 |
| 15D10277                    | 4.6 %  | ✓0.0812401 | 1.055 | 174.5698  | 0.363 | 4.195472  | 0.940  | 354.7725  | 0.067 | 43.50154  | 0.213 | 0.09238 ± 0.00155 | 293.2 ± 4.9   | 75.31       | 6.88        | 0.87 ± 0.01 |
| 15D10278                    | 4.9 %  | ✓0.1027821 | 0.958 | 215.0328  | 0.354 | 5.614204  | 0.718  | 476.5802  | 0.066 | 57.26032  | 0.163 | 0.09065 ± 0.00131 | 287.8 ± 4.2   | 75.43       | 9.24        | 0.95 ± 0.01 |
| 15D10280                    | 5.2 %  | ✓0.0512694 | 1.490 | 105.5285  | 0.425 | 3.073390  | 1.266  | 259.4918  | 0.068 | 30.57851  | 0.303 | 0.09022 ± 0.00191 | 286.4 ± 6.0   | 76.54       | 5.03        | 1.06 ± 0.01 |
| 15D10281                    | 5.5 %  | ✓0.0592252 | 1.409 | 106.0083  | 0.411 | 3.484272  | 1.095  | 295.6729  | 0.067 | 36.29957  | 0.254 | 0.09058 ± 0.00180 | 287.5 ± 5.7   | 73.76       | 5.73        | 1.20 ± 0.01 |
| 15D10282                    | 5.8 %  | ✓0.0421097 | 1.793 | 68.5335   | 0.524 | 2.452655  | 1.553  | 207.3166  | 0.070 | 25.81219  | 0.360 | 0.08930 ± 0.00235 | 283.5 ± 7.5   | 71.71       | 4.02        | 1.30 ± 0.01 |
| 15D10284                    | 6.1 %  | ✓0.0343350 | 2.348 | 53.5145   | 0.601 | 2.030984  | 1.821  | 168.8459  | 0.071 | 21.60049  | 0.433 | 0.09160 ± 0.00305 | 290.8 ± 9.7   | 71.59       | 3.27        | 1.36 ± 0.02 |
| 15D10285                    | 6.5 %  | ✓0.0289266 | 2.599 | 38.9893   | 0.759 | 1.530052  | 2.490  | 125.8855  | 0.075 | 16.97372  | 0.545 | 0.09014 ± 0.00384 | 286.1 ± 12.2  | 66.84       | 2.44        | 1.39 ± 0.02 |
| 15D10286                    | 7.0 %  | ✓0.0271888 | 2.575 | 35.4040   | 0.852 | 1.324665  | 2.785  | 112.7915  | 0.077 | 15.67146  | 0.591 | 0.09122 ± 0.00404 | 289.6 ± 12.8  | 65.64       | 2.19        | 1.37 ± 0.02 |
| 15D10288                    | 7.6 %  | 0.0364675  | 2.065 | 40.6988   | 0.728 | 1.508011  | 2.438  | 128.5700  | 0.075 | 19.10643  | 0.485 | 0.08851 ± 0.00377 | 281.0 ± 12.0  | 59.55       | 2.49        | 1.36 ± 0.02 |
| 15D10289                    | 8.4 %  | 0.0433832  | 1.721 | 44.3257   | 0.696 | 1.604371  | 2.357  | 132.6096  | 0.074 | 21.24316  | 0.434 | 0.08864 ± 0.00363 | 281.4 ± 11.5  | 55.32       | 2.57        | 1.29 ± 0.02 |
| 15D10290                    | 9.4 %  | 0.0592222  | 1.412 | 54.7556   | 0.583 | 1.889826  | 2.008  | 151.1912  | 0.074 | 26.20526  | 0.357 | 0.08489 ± 0.00351 | 269.5 ± 11.2  | 48.96       | 2.93        | 1.19 ± 0.01 |
| 15D10292                    | 10.5 % | 0.0698122  | 1.323 | 65.9883   | 0.533 | 2.026155  | 1.954  | 168.6161  | 0.071 | 30.71011  | 0.303 | 0.08935 ± 0.00344 | 283.6 ± 10.9  | 49.05       | 3.27        | 1.10 ± 0.01 |
| 15D10293                    | 11.7 % | 0.0735274  | 1.227 | 65.8530   | 0.530 | 1.858754  | 2.100  | 152.3864  | 0.072 | 30.27858  | 0.306 | 0.08888 ± 0.00372 | 282.1 ± 11.8  | 44.72       | 2.95        | 0.99 ± 0.01 |
| 15D10294                    | 13.1 % | 0.0888527  | 1.033 | 71.4246   | 0.494 | 1.808082  | 2.181  | 145.1791  | 0.073 | 33.51187  | 0.281 | 0.08742 ± 0.00398 | 277.5 ± 12.6  | 37.86       | 2.81        | 0.87 ± 0.01 |
| 15D10296                    | 14.7 % | 0.1150325  | 0.875 | 89.1971   | 0.458 | 1.788001  | 2.238  | 140.8330  | 0.073 | 38.52240  | 0.241 | 0.08065 ± 0.00445 | 256.0 ± 14.1  | 29.47       | 2.73        | 0.68 ± 0.01 |
| 15D10297                    | 16.5 % | 0.1631606  | 0.725 | 172.9888  | 0.365 | 1.667009  | 2.188  | 127.5921  | 0.076 | 45.22648  | 0.205 | 0.08149 ± 0.00573 | 258.7 ± 18.2  | 22.97       | 2.47        | 0.32 ± 0.00 |
| 15D10298                    | 18.5 % | 0.1471692  | 0.782 | 156.1201  | 0.372 | 0.955185  | 3.847  | 66.9565   | 0.094 | 36.56632  | 0.258 | 0.07774 ± 0.01064 | 246.8 ± 33.8  | 14.21       | 1.30        | 0.18 ± 0.00 |
| 15D10300                    | 19.8 % | 0.1024898  | 1.035 | 110.0259  | 0.418 | 0.496570  | 7.502  | 35.2286   | 0.142 | 25.15590  | 0.367 | 0.09733 ± 0.01870 | 309.0 ± 59.3  | 13.60       | 0.68        | 0.14 ± 0.00 |
| 15D10301                    | 21.7 % | 0.0925341  | 1.036 | 108.4815  | 0.420 | 0.345864  | 11.635 | 23.0450   | 0.208 | 20.87742  | 0.446 | 0.08603 ± 0.02614 | 273.1 ± 83.0  | 9.47        | 0.45        | 0.09 ± 0.00 |
| 15D10302                    | 22.8 % | 0.0706372  | 1.242 | 78.7754   | 0.459 | 0.195062  | 18.481 | 15.4403   | 0.288 | 15.90667  | 0.577 | 0.07563 ± 0.03594 | 240.1 ± 114.1 | 7.32        | 0.30        | 0.08 ± 0.00 |
| 15D10304                    | 24.3 % | 0.0690847  | 1.273 | 84.1040   | 0.451 | 0.245814  | 15.913 | 12.8224   | 0.338 | 15.01259  | 0.615 | 0.09011 ± 0.04345 | 286.0 ± 137.9 | 7.66        | 0.25        | 0.07 ± 0.00 |
| Σ                           |        | 2.3059742  | 0.216 | 2808.5982 | 0.088 | 61.774008 | 0.346  | 5157.5676 | 0.015 | 932.12588 | 0.056 |                   |               |             |             |             |

| Information on Analysis and Constants Used in Calculations |                                                                 | Results               |                           |                           |              |                      |             |
|------------------------------------------------------------|-----------------------------------------------------------------|-----------------------|---------------------------|---------------------------|--------------|----------------------|-------------|
|                                                            |                                                                 | 40(a)/36(a) ± 2σ      | 40(r)/39(k) ± 2σ          | Age ± 2σ (ka)             | MSWD         | 39Ar(k) (% ,n)       | K/Ca ± 2σ   |
| Sample = 154-1                                             | Age Equations = Min et al. (2000)                               |                       |                           |                           |              |                      |             |
| Material = Groundmass                                      | Negative Intensities = Allowed                                  |                       |                           |                           |              |                      |             |
| Location = Kerguelen Plateau                               | Decay Constant 40K = 5.530 ± 0.048 E-10 1/a                     |                       | 0.09139 ± 0.00056 ± 0.61% | 290.1 ± 1.9 ± 0.65%       | 1.07 38%     | 73.32 16             | 0.97 ± 0.07 |
| Analyst = Dan Miggins                                      | Decay Constant 39Ar = 2.940 ± 0.016 E-07 1/h                    |                       |                           | Full External Error ± 6.8 | 1.73         | 2σ Confidence Limit  |             |
| Project = KERGUELEN   FALLOON (14-PIL-01)                  | Decay Constant 37Ar = 8.230 ± 0.012 E-04 1/h                    |                       |                           | Analytical Error ± 1.8    | 1.0322       | Error Magnification  |             |
| Mass Discrimination Law = LIN                              | Decay Constant 36Cl = 2.257 ± 0.015 E-06 1/a                    |                       |                           |                           |              |                      |             |
| Irradiation = 14-OSU-07 (7B26-14)                          | Decay Constant 40K(EC,β <sup>+</sup> ) = 0.580 ± 0.009 E-10 1/a |                       | 0.09014 ± 0.00061 ± 0.68% | 286.1 ± 2.0 ± 0.72%       |              | 31                   | 0.79 ± 0.00 |
| J = 0.00175554 ± 0.00000202                                | Decay Constant 40K(β <sup>-</sup> ) = 4.950 ± 0.043 E-10 1/a    |                       |                           | Full External Error ± 6.8 |              |                      |             |
| FCT-NM = 28.201 ± 0.023 Ma                                 | Atmospheric Ratio 40/36(a) = 295.50                             |                       |                           | Analytical Error ± 1.9    |              |                      |             |
| IGSN = Undefined                                           | Atmospheric Ratio 38/36(a) = 0.1869                             |                       |                           |                           |              |                      |             |
| Preferred Age = Undefined                                  | Production Ratio 39/37(ca) = 0.000673                           |                       |                           |                           |              |                      |             |
| Classification = Undefined                                 | Production Ratio 38/37(ca) = 0.000014                           | 304.49 ± 6.63 ± 2.18% | 0.09008 ± 0.00108 ± 1.20% | 285.9 ± 3.5 ± 1.23%       | 0.61 86%     | 73.32 16             |             |
| Experiment Type = Incremental Heating                      | Production Ratio 36/37(ca) = 0.000264                           |                       |                           | Full External Error ± 7.3 | 1.76         | 2σ Confidence Limit  |             |
| Extraction Method = Undefined                              | Production Ratio 40/39(k) = 0.001010                            |                       |                           | Analytical Error ± 3.4    | 1.0000       | Error Magnification  |             |
| Heating = 77 sec                                           | Production Ratio 38/39(k) = 0.011380                            |                       |                           |                           | 20           | Number of Iterations |             |
| Isolation = 6.00 min                                       | Production Ratio 36/38(cl) = 262.80 ± 1.71                      |                       |                           |                           | 0.0000007873 | Convergence          |             |
| Instrument = ARGUS-VI-D                                    | Scaling Ratio K/Ca = 0.430                                      |                       |                           |                           |              |                      |             |
| Lithology = Undefined                                      | Abundance Ratio 40K/K = 1.1700 ± 0.0100 E-04                    |                       |                           |                           |              |                      |             |
| Lat-Lon = Undefined - Undefined                            | Atomic Weight K = 39.0983 ± 0.0001 g                            | 304.30 ± 6.64 ± 2.18% | 0.09016 ± 0.00108 ± 1.20% | 286.2 ± 3.5 ± 1.23%       | 0.61 86%     | 73.32 16             |             |
| Collector Calibrations = 40Ar 36Ar                         |                                                                 |                       |                           | Full External Error ± 7.4 | 1.76         | 2σ Confidence Limit  |             |

15D10263.full.xls printed at 06-07-2015 (15:31)  
ArArCALC v2.6.2 -- Beta Version



| OSU Argon Geochronology Lab |        |                 |      |                 |      |                  |      |                  |        |                  |      |                 |      |                 |      |                 |      |                  |      |                  |        |                 |      |                  |      |                 |      |                 |      |                 |      |                 |      |
|-----------------------------|--------|-----------------|------|-----------------|------|------------------|------|------------------|--------|------------------|------|-----------------|------|-----------------|------|-----------------|------|------------------|------|------------------|--------|-----------------|------|------------------|------|-----------------|------|-----------------|------|-----------------|------|-----------------|------|
| Degassing<br>Patterns       |        | 36Ar(a)<br>[fA] | %1σ  | 36Ar(c)<br>[fA] | %1σ  | 36Ar(ca)<br>[fA] | %1σ  | 36Ar(cl)<br>[fA] | %1σ    | 37Ar(ca)<br>[fA] | %1σ  | 38Ar(a)<br>[fA] | %1σ  | 38Ar(c)<br>[fA] | %1σ  | 38Ar(k)<br>[fA] | %1σ  | 38Ar(ca)<br>[fA] | %1σ  | 38Ar(cl)<br>[fA] | %1σ    | 39Ar(k)<br>[fA] | %1σ  | 39Ar(ca)<br>[fA] | %1σ  | 40Ar(r)<br>[fA] | %1σ  | 40Ar(a)<br>[fA] | %1σ  | 40Ar(c)<br>[fA] | %1σ  | 40Ar(k)<br>[fA] | %1σ  |
|                             |        |                 |      |                 |      |                  |      |                  |        |                  |      |                 |      |                 |      |                 |      |                  |      |                  |        |                 |      |                  |      |                 |      |                 |      |                 |      |                 |      |
| 15D10264                    | 2.0 %  | 0.0457977       | 1.79 | 0.0000000       | 0.00 | 0.0037173        | 2.01 | 0.0000000        | 0.00   | 14.0806          | 2.01 | 0.0085596       | 1.79 | 0.0000000       | 0.00 | 0.345878        | 0.16 | 0.0001957        | 2.01 | 0.0000000        | 0.00   | 30.3935         | 0.16 | 0.0094762        | 2.01 | 2.90675         | 8.93 | 13.53323        | 1.79 | 0.0000000       | 0.00 | 0.0306975       | 0.16 |
| 15D10266                    | 2.2 %  | 0.0496676       | 1.63 | 0.0000000       | 0.00 | 0.0053766        | 1.34 | 0.0000000        | 0.00   | 20.3661          | 1.34 | 0.0092829       | 1.63 | 0.0000000       | 0.00 | 0.514379        | 0.12 | 0.0002831        | 1.34 | 0.0000000        | 0.00   | 45.2003         | 0.12 | 0.0137064        | 1.34 | 3.69857         | 6.95 | 14.67677        | 1.63 | 0.0000000       | 0.00 | 0.0456523       | 0.12 |
| 15D10267                    | 2.4 %  | ✓ 0.0398951     | 1.92 | 0.0000000       | 0.00 | 0.0058936        | 1.17 | 0.0000000        | 0.00   | 22.3244          | 1.17 | 0.0074564       | 1.92 | 0.0000000       | 0.00 | 0.571385        | 0.11 | 0.0003103        | 1.17 | 0.0000000        | 0.00   | 50.2095         | 0.11 | 0.0150243        | 1.17 | 4.89719         | 5.00 | 11.78901        | 1.92 | 0.0000000       | 0.00 | 0.0507116       | 0.11 |
| 15D10268                    | 2.6 %  | ✓ 0.0508406     | 1.54 | 0.0000000       | 0.00 | 0.0102736        | 0.79 | 0.0000020        | 286.06 | 38.9151          | 0.79 | 0.0095021       | 1.54 | 0.0000000       | 0.00 | 1.008281        | 0.09 | 0.0005409        | 0.79 | 0.0134878        | 286.07 | 88.6011         | 0.09 | 0.0261899        | 0.79 | 8.38786         | 2.97 | 15.02339        | 1.54 | 0.0000000       | 0.00 | 0.0894871       | 0.09 |
| 15D10270                    | 2.8 %  | ✓ 0.0458148     | 1.82 | 0.0000000       | 0.00 | 0.0112677        | 0.71 | 0.0000000        | 0.00   | 42.6808          | 0.71 | 0.0085628       | 1.82 | 0.0000000       | 0.00 | 1.110891        | 0.08 | 0.0005933        | 0.71 | 0.0000000        | 0.00   | 97.6178         | 0.08 | 0.0287242        | 0.71 | 9.00573         | 2.92 | 13.53826        | 1.82 | 0.0000000       | 0.00 | 0.0985940       | 0.08 |
| 15D10271                    | 3.0 %  | ✓ 0.0630154     | 1.54 | 0.0000000       | 0.00 | 0.0219067        | 0.47 | 0.0000000        | 0.00   | 82.9798          | 0.47 | 0.0117776       | 1.54 | 0.0000000       | 0.00 | 2.177757        | 0.07 | 0.0011534        | 0.47 | 0.0000000        | 0.00   | 191.3670        | 0.07 | 0.0558454        | 0.47 | 17.90117        | 1.68 | 18.62104        | 1.54 | 0.0000000       | 0.00 | 0.1932807       | 0.07 |
| 15D10272                    | 3.3 %  | ✓ 0.0552142     | 1.55 | 0.0000000       | 0.00 | 0.0253995        | 0.43 | 0.0000138        | 40.60  | 96.2102          | 0.43 | 0.0103195       | 1.55 | 0.0000000       | 0.00 | 2.467007        | 0.07 | 0.0013373        | 0.43 | 0.0919541        | 40.61  | 216.7844        | 0.07 | 0.0647494        | 0.43 | 20.02846        | 1.35 | 16.31579        | 1.55 | 0.0000000       | 0.00 | 0.2189523       | 0.07 |
| 15D10273                    | 3.6 %  | ✓ 0.0695274     | 1.59 | 0.0000000       | 0.00 | 0.0450946        | 0.37 | 0.0000162        | 37.88  | 170.8129         | 0.37 | 0.0129947       | 1.59 | 0.0000000       | 0.00 | 4.159598        | 0.07 | 0.0023743        | 0.37 | 0.1082873        | 37.89  | 365.5183        | 0.07 | 0.1149571        | 0.37 | 33.70987        | 1.01 | 20.54534        | 1.59 | 0.0000000       | 0.00 | 0.3691735       | 0.07 |
| 15D10275                    | 3.9 %  | ✓ 0.0556862     | 1.85 | 0.0000000       | 0.00 | 0.0517442        | 0.35 | 0.0000290        | 20.33  | 196.0006         | 0.35 | 0.0104078       | 1.85 | 0.0000000       | 0.00 | 4.530715        | 0.07 | 0.0027244        | 0.35 | 0.1935478        | 20.35  | 398.1297        | 0.07 | 0.1319084        | 0.35 | 36.66736        | 0.87 | 16.45528        | 1.85 | 0.0000000       | 0.00 | 0.4021110       | 0.07 |
| 15D10276                    | 4.3 %  | ✓ 0.0427566     | 2.16 | 0.0000000       | 0.00 | 0.0485518        | 0.36 | 0.0000216        | 26.97  | 183.9084         | 0.36 | 0.0079912       | 2.16 | 0.0000000       | 0.00 | 4.225785        | 0.07 | 0.0025563        | 0.36 | 0.1443996        | 26.98  | 371.3344        | 0.07 | 0.1237704        | 0.36 | 33.89554        | 0.85 | 12.63457        | 2.16 | 0.0000000       | 0.00 | 0.3750477       | 0.07 |
| 15D10277                    | 4.6 %  | ✓ 0.0351311     | 2.49 | 0.0000000       | 0.00 | 0.0460864        | 0.36 | 0.0000226        | 26.27  | 174.5698         | 0.36 | 0.0065660       | 2.49 | 0.0000000       | 0.00 | 4.035974        | 0.07 | 0.0024265        | 0.36 | 0.1505054        | 26.29  | 354.6551        | 0.07 | 0.1174855        | 0.36 | 32.76211        | 0.84 | 10.38123        | 2.49 | 0.0000000       | 0.00 | 0.3582016       | 0.07 |
| 15D10278                    | 4.9 %  | ✓ 0.0459863     | 2.18 | 0.0000000       | 0.00 | 0.0567687        | 0.35 | 0.0000271        | 22.39  | 215.0328         | 0.35 | 0.0085948       | 2.18 | 0.0000000       | 0.00 | 5.421835        | 0.07 | 0.0029890        | 0.35 | 0.1807852        | 22.41  | 476.4354        | 0.07 | 0.1447171        | 0.35 | 43.19016        | 0.72 | 13.58896        | 2.18 | 0.0000000       | 0.00 | 0.4811998       | 0.07 |
| 15D10280                    | 5.2 %  | ✓ 0.0233926     | 3.31 | 0.0000000       | 0.00 | 0.0278595        | 0.43 | 0.0000173        | 33.78  | 105.5285         | 0.43 | 0.0043721       | 3.31 | 0.0000000       | 0.00 | 2.952208        | 0.07 | 0.0014668        | 0.43 | 0.1153430        | 33.79  | 259.4208        | 0.07 | 0.0710207        | 0.43 | 23.40398        | 1.05 | 6.91251         | 3.31 | 0.0000000       | 0.00 | 0.2620150       | 0.07 |
| 15D10281                    | 5.5 %  | ✓ 0.0312221     | 2.70 | 0.0000000       | 0.00 | 0.0279862        | 0.41 | 0.0000169        | 33.83  | 106.0083         | 0.41 | 0.0058354       | 2.70 | 0.0000000       | 0.00 | 3.363946        | 0.07 | 0.0014735        | 0.41 | 0.1130173        | 33.85  | 295.6016        | 0.07 | 0.0713436        | 0.41 | 26.77489        | 0.99 | 9.22612         | 2.70 | 0.0000000       | 0.00 | 0.2985576       | 0.07 |
| 15D10282                    | 5.8 %  | ✓ 0.0240036     | 3.17 | 0.0000000       | 0.00 | 0.0180928        | 0.52 | 0.0000133        | 43.10  | 68.5335          | 0.52 | 0.0044863       | 3.17 | 0.0000000       | 0.00 | 2.358738        | 0.07 | 0.0009526        | 0.52 | 0.0884786        | 43.11  | 207.2704        | 0.07 | 0.0461230        | 0.52 | 18.50977        | 1.32 | 7.09307         | 3.17 | 0.0000000       | 0.00 | 0.2093431       | 0.07 |
| 15D10284                    | 6.1 %  | ✓ 0.0201914     | 4.02 | 0.0000000       | 0.00 | 0.0141278        | 0.60 | 0.0000158        | 35.13  | 53.5145          | 0.60 | 0.0037738       | 4.02 | 0.0000000       | 0.00 | 1.921057        | 0.07 | 0.0007439        | 0.60 | 0.1054097        | 35.14  | 168.8099        | 0.07 | 0.0360152        | 0.60 | 15.46345        | 1.66 | 5.96655         | 4.02 | 0.0000000       | 0.00 | 0.1704980       | 0.07 |
| 15D10285                    | 6.5 %  | ✓ 0.0186194     | 4.06 | 0.0000000       | 0.00 | 0.0102932        | 0.76 | 0.0000141        | 40.67  | 38.9893          | 0.76 | 0.0034800       | 4.06 | 0.0000000       | 0.00 | 1.432279        | 0.07 | 0.0005420        | 0.76 | 0.0937517        | 40.68  | 125.8593        | 0.07 | 0.0262398        | 0.76 | 11.34457        | 2.13 | 5.50203         | 4.06 | 0.0000000       | 0.00 | 0.1271179       | 0.07 |
| 15D10286                    | 7.0 %  | ✓ 0.0178366     | 3.95 | 0.0000000       | 0.00 | 0.0093466        | 0.85 | 0.0000056        | 98.30  | 35.4040          | 0.85 | 0.0033337       | 3.95 | 0.0000000       | 0.00 | 1.283296        | 0.08 | 0.0004921        | 0.85 | 0.0375439        | 98.30  | 112.7676        | 0.08 | 0.0238269        | 0.85 | 10.28686        | 2.22 | 5.27071         | 3.95 | 0.0000000       | 0.00 | 0.1138953       | 0.08 |
| 15D10288                    | 7.6 %  | 0.0257171       | 2.94 | 0.0000000       | 0.00 | 0.0107445        | 0.73 | 0.0000060        | 92.38  | 40.6988          | 0.73 | 0.0048065       | 2.94 | 0.0000000       | 0.00 | 1.462815        | 0.07 | 0.0005657        | 0.73 | 0.0398233        | 92.39  | 128.5427        | 0.07 | 0.0273903        | 0.73 | 11.37721        | 2.13 | 7.59939         | 2.94 | 0.0000000       | 0.00 | 0.1298281       | 0.07 |
| 15D10289                    | 8.4 %  | 0.0316679       | 2.37 | 0.0000000       | 0.00 | 0.0117020        | 0.70 | 0.0000134        | 42.48  | 44.3257          | 0.70 | 0.0059187       | 2.37 | 0.0000000       | 0.00 | 1.508758        | 0.07 | 0.0006161        | 0.70 | 0.0890785        | 42.49  | 132.5798        | 0.07 | 0.0298312        | 0.70 | 11.75139        | 2.05 | 9.35786         | 2.37 | 0.0000000       | 0.00 | 0.1339056       | 0.07 |
| 15D10290                    | 9.4 %  | 0.0447427       | 1.88 | 0.0000000       | 0.00 | 0.0144555        | 0.58 | 0.0000241        | 23.67  | 54.7556          | 0.58 | 0.0083624       | 1.88 | 0.0000000       | 0.00 | 1.720136        | 0.07 | 0.0007611        | 0.58 | 0.1605658        | 23.69  | 151.1543        | 0.07 | 0.0368505        | 0.58 | 12.83114        | 2.07 | 13.22146        | 1.88 | 0.0000000       | 0.00 | 0.1526659       | 0.07 |
| 15D10292                    | 10.5 % | 0.0523767       | 1.77 | 0.0000000       | 0.00 | 0.0174209        | 0.53 | 0.0000146        | 40.81  | 65.9883          | 0.53 | 0.0097892       | 1.77 | 0.0000000       | 0.00 | 1.918345        | 0.07 | 0.0009172        | 0.53 | 0.0971028        | 40.82  | 168.5717        | 0.07 | 0.0444101        | 0.53 | 15.06254        | 1.92 | 15.47731        | 1.77 | 0.0000000       | 0.00 | 0.1702574       | 0.07 |
| 15D10293                    | 11.7 % | 0.0561251       | 1.62 | 0.0000000       | 0.00 | 0.0173852        | 0.53 | 0.0000171        | 34.36  | 65.8530          | 0.53 | 0.0104898       | 1.62 | 0.0000000       | 0.00 | 1.733653        | 0.07 | 0.0009154        | 0.53 | 0.1136958        | 34.38  | 152.3421        | 0.07 | 0.0443191        | 0.53 | 13.53974        | 2.09 | 16.58497        | 1.62 | 0.0000000       | 0.00 | 0.1538655       | 0.07 |
| 15D10294                    | 13.1 % | 0.0699753       | 1.32 | 0.0000000       | 0.00 | 0.0188561        | 0.49 | 0.0000214        | 27     |                  |      |                 |      |                 |      |                 |      |                  |      |                  |        |                 |      |                  |      |                 |      |                 |      |                 |      |                 |      |



| Additional Parameters |         | 40Ar/39Ar | 1σ       | 37Ar/39Ar | 1σ       | 36Ar/39Ar | 1σ       | Time (days) | 37Ar (decay) | 39Ar (decay) | 40Ar (moles) |
|-----------------------|---------|-----------|----------|-----------|----------|-----------|----------|-------------|--------------|--------------|--------------|
| 15D10264              | 2.0 %   | 0.541745  | 0.003174 | 0.463131  | 0.009344 | 0.001629  | 0.000027 | 92.157      | 6.188866     | 1.00065135   | 7.906E-13    |
| 15D10266              | 2.2 %   | 0.407418  | 0.002105 | 0.450437  | 0.006047 | 0.001217  | 0.000018 | 92.176      | 6.191159     | 1.00065149   | 8.842E-13    |
| 15D10267              | 2.4 % ✓ | 0.333241  | 0.001883 | 0.444492  | 0.005242 | 0.000912  | 0.000015 | 92.185      | 6.192348     | 1.00065155   | 8.034E-13    |
| 15D10268              | 2.6 % ✓ | 0.265164  | 0.001073 | 0.439087  | 0.003506 | 0.000690  | 0.000009 | 92.196      | 6.193622     | 1.00065163   | 1.128E-12    |
| 15D10270              | 2.8 % ✓ | 0.231883  | 0.000960 | 0.437095  | 0.003138 | 0.000585  | 0.000009 | 92.214      | 6.195831     | 1.00065176   | 1.087E-12    |
| 15D10271              | 3.0 % ✓ | 0.191803  | 0.000506 | 0.433489  | 0.002069 | 0.000444  | 0.000005 | 92.224      | 6.197021     | 1.00065182   | 1.762E-12    |
| 15D10272              | 3.3 % ✓ | 0.168611  | 0.000443 | 0.443673  | 0.001949 | 0.000372  | 0.000004 | 92.233      | 6.198212     | 1.00065189   | 1.755E-12    |
| 15D10273              | 3.6 % ✓ | 0.149397  | 0.000276 | 0.467170  | 0.001739 | 0.000314  | 0.000003 | 92.243      | 6.199402     | 1.00065196   | 2.622E-12    |
| 15D10275              | 3.9 % ✓ | 0.134396  | 0.000253 | 0.492140  | 0.001771 | 0.000270  | 0.000003 | 92.261      | 6.201613     | 1.00065209   | 2.569E-12    |
| 15D10276              | 4.3 % ✓ | 0.126273  | 0.000265 | 0.495099  | 0.001815 | 0.000246  | 0.000002 | 92.270      | 6.202719     | 1.00065215   | 2.251E-12    |
| 15D10277              | 4.6 % ✓ | 0.122618  | 0.000274 | 0.492061  | 0.001816 | 0.000229  | 0.000002 | 92.279      | 6.203825     | 1.00065222   | 2.088E-12    |
| 15D10278              | 4.9 % ✓ | 0.120148  | 0.000211 | 0.451200  | 0.001625 | 0.000216  | 0.000002 | 92.287      | 6.204847     | 1.00065228   | 2.748E-12    |
| 15D10280              | 5.2 % ✓ | 0.117840  | 0.000366 | 0.406674  | 0.001751 | 0.000198  | 0.000003 | 92.305      | 6.206975     | 1.00065240   | 1.468E-12    |
| 15D10281              | 5.5 % ✓ | 0.122769  | 0.000323 | 0.358532  | 0.001494 | 0.000200  | 0.000003 | 92.314      | 6.208082     | 1.00065246   | 1.742E-12    |
| 15D10282              | 5.8 % ✓ | 0.124506  | 0.000457 | 0.330574  | 0.001749 | 0.000203  | 0.000004 | 92.322      | 6.209103     | 1.00065252   | 1.239E-12    |
| 15D10284              | 6.1 % ✓ | 0.127930  | 0.000561 | 0.316943  | 0.001920 | 0.000203  | 0.000005 | 92.340      | 6.211233     | 1.00065264   | 1.037E-12    |
| 15D10285              | 6.5 % ✓ | 0.134835  | 0.000741 | 0.309720  | 0.002362 | 0.000230  | 0.000006 | 92.349      | 6.212341     | 1.00065271   | 8.147E-13    |
| 15D10286              | 7.0 % ✓ | 0.138942  | 0.000828 | 0.313889  | 0.002684 | 0.000241  | 0.000006 | 92.357      | 6.213363     | 1.00065277   | 7.522E-13    |
| 15D10288              | 7.6 %   | 0.148607  | 0.000729 | 0.316549  | 0.002317 | 0.000284  | 0.000006 | 92.374      | 6.215494     | 1.00065289   | 9.171E-13    |
| 15D10289              | 8.4 %   | 0.160193  | 0.000706 | 0.334257  | 0.002339 | 0.000327  | 0.000006 | 92.383      | 6.216603     | 1.00065295   | 1.020E-12    |
| 15D10290              | 9.4 %   | 0.173325  | 0.000631 | 0.362162  | 0.002127 | 0.000392  | 0.000006 | 92.392      | 6.217626     | 1.00065301   | 1.258E-12    |
| 15D10292              | 10.5 %  | 0.182130  | 0.000567 | 0.391352  | 0.002104 | 0.000414  | 0.000005 | 92.409      | 6.219759     | 1.00065313   | 1.474E-12    |
| 15D10293              | 11.7 %  | 0.198696  | 0.000625 | 0.432145  | 0.002310 | 0.000483  | 0.000006 | 92.418      | 6.220868     | 1.00065320   | 1.453E-12    |
| 15D10294              | 13.1 %  | 0.230831  | 0.000671 | 0.491975  | 0.002455 | 0.000612  | 0.000006 | 92.426      | 6.221892     | 1.00065326   | 1.609E-12    |
| 15D10296              | 14.7 %  | 0.273533  | 0.000689 | 0.633354  | 0.002939 | 0.000817  | 0.000007 | 92.444      | 6.224026     | 1.00065338   | 1.849E-12    |
| 15D10297              | 16.5 %  | 0.354461  | 0.000775 | 1.355795  | 0.005052 | 0.001279  | 0.000009 | 92.453      | 6.225136     | 1.00065344   | 2.171E-12    |
| 15D10298              | 18.5 %  | 0.546120  | 0.001499 | 2.331664  | 0.008941 | 0.002198  | 0.000017 | 92.462      | 6.226246     | 1.00065351   | 1.755E-12    |
| 15D10300              | 19.8 %  | 0.714076  | 0.002812 | 3.123198  | 0.013802 | 0.002909  | 0.000030 | 92.479      | 6.228381     | 1.00065363   | 1.207E-12    |
| 15D10301              | 21.7 %  | 0.905941  | 0.004459 | 4.707372  | 0.022078 | 0.004015  | 0.000042 | 92.488      | 6.229492     | 1.00065369   | 1.002E-12    |
| 15D10302              | 22.8 %  | 1.030206  | 0.006646 | 5.101941  | 0.027664 | 0.004575  | 0.000058 | 92.497      | 6.230603     | 1.00065376   | 7.635E-13    |
| 15D10304              | 24.3 %  | 1.170808  | 0.008216 | 6.559133  | 0.036958 | 0.005388  | 0.000071 | 92.515      | 6.232825     | 1.00065388   | 7.206E-13    |



| Procedure<br>Blanks |        | 36Ar<br>[fA] | 1σ        | 37Ar<br>[fA] | 1σ        | 38Ar<br>[fA] | 1σ        | 39Ar<br>[fA] | 1σ        | 40Ar<br>[fA] | 1σ        |
|---------------------|--------|--------------|-----------|--------------|-----------|--------------|-----------|--------------|-----------|--------------|-----------|
| 15D10264            | 2.0 %  | 0.0100984    | 0.0004494 | 0.0040380    | 0.0300591 | 0.0191666    | 0.0262862 | 0.0084255    | 0.0343460 | 3.0506843    | 0.0879493 |
| 15D10266            | 2.2 %  | 0.0101154    | 0.0004494 | 0.0078157    | 0.0300591 | 0.0206868    | 0.0262862 | 0.0107921    | 0.0343460 | 3.0432068    | 0.0879493 |
| 15D10267            | 2.4 %  | 0.0101241    | 0.0004494 | 0.0096118    | 0.0300591 | 0.0214750    | 0.0262862 | 0.0120192    | 0.0343460 | 3.0399749    | 0.0879493 |
| 15D10268            | 2.6 %  | 0.0101336    | 0.0004494 | 0.0114129    | 0.0300591 | 0.0223195    | 0.0262862 | 0.0133340    | 0.0343460 | 3.0370010    | 0.0879493 |
| 15D10270            | 2.8 %  | 0.0101499    | 0.0004494 | 0.0142326    | 0.0300591 | 0.0237834    | 0.0262862 | 0.0156130    | 0.0343460 | 3.0330447    | 0.0879493 |
| 15D10271            | 3.0 %  | 0.0101586    | 0.0004494 | 0.0155922    | 0.0300591 | 0.0245716    | 0.0262862 | 0.0168401    | 0.0343460 | 3.0315438    | 0.0879493 |
| 15D10272            | 3.3 %  | 0.0101674    | 0.0004494 | 0.0168406    | 0.0300591 | 0.0253598    | 0.0262862 | 0.0180672    | 0.0343460 | 3.0304837    | 0.0879493 |
| 15D10273            | 3.6 %  | 0.0101762    | 0.0004494 | 0.0179779    | 0.0300591 | 0.0261480    | 0.0262862 | 0.0192944    | 0.0343460 | 3.0298641    | 0.0879493 |
| 15D10275            | 3.9 %  | 0.0101925    | 0.0004494 | 0.0197952    | 0.0300591 | 0.0276119    | 0.0262862 | 0.0215733    | 0.0343460 | 3.0298827    | 0.0879493 |
| 15D10276            | 4.3 %  | 0.0102007    | 0.0004494 | 0.0205602    | 0.0300591 | 0.0283438    | 0.0262862 | 0.0227128    | 0.0343460 | 3.0304619    | 0.0879493 |
| 15D10277            | 4.6 %  | 0.0102088    | 0.0004494 | 0.0212293    | 0.0300591 | 0.0290757    | 0.0262862 | 0.0238523    | 0.0343460 | 3.0314210    | 0.0879493 |
| 15D10278            | 4.9 %  | 0.0102164    | 0.0004494 | 0.0217619    | 0.0300591 | 0.0297513    | 0.0262862 | 0.0249041    | 0.0343460 | 3.0326436    | 0.0879493 |
| 15D10280            | 5.2 %  | 0.0102321    | 0.0004494 | 0.0226093    | 0.0300591 | 0.0311589    | 0.0262862 | 0.0270955    | 0.0343460 | 3.0362305    | 0.0879493 |
| 15D10281            | 5.5 %  | 0.0102402    | 0.0004494 | 0.0229099    | 0.0300591 | 0.0318908    | 0.0262862 | 0.0282349    | 0.0343460 | 3.0386510    | 0.0879493 |
| 15D10282            | 5.8 %  | 0.0102477    | 0.0004494 | 0.0231023    | 0.0300591 | 0.0325664    | 0.0262862 | 0.0292868    | 0.0343460 | 3.0412226    | 0.0879493 |
| 15D10284            | 6.1 %  | 0.0102634    | 0.0004494 | 0.0232411    | 0.0300591 | 0.0339739    | 0.0262862 | 0.0314781    | 0.0343460 | 3.0476198    | 0.0879493 |
| 15D10285            | 6.5 %  | 0.0102716    | 0.0004494 | 0.0231732    | 0.0300591 | 0.0347058    | 0.0262862 | 0.0326176    | 0.0343460 | 3.0515016    | 0.0879493 |
| 15D10286            | 7.0 %  | 0.0102791    | 0.0004494 | 0.0230254    | 0.0300591 | 0.0353815    | 0.0262862 | 0.0336694    | 0.0343460 | 3.0554221    | 0.0879493 |
| 15D10288            | 7.6 %  | 0.0102948    | 0.0004494 | 0.0224555    | 0.0300591 | 0.0367890    | 0.0262862 | 0.0358607    | 0.0343460 | 3.0646296    | 0.0879493 |
| 15D10289            | 8.4 %  | 0.0103030    | 0.0004494 | 0.0220190    | 0.0300591 | 0.0375209    | 0.0262862 | 0.0370002    | 0.0343460 | 3.0699728    | 0.0879493 |
| 15D10290            | 9.4 %  | 0.0103105    | 0.0004494 | 0.0215312    | 0.0300591 | 0.0381965    | 0.0262862 | 0.0380520    | 0.0343460 | 3.0752422    | 0.0879493 |
| 15D10292            | 10.5 % | 0.0103262    | 0.0004494 | 0.0202525    | 0.0300591 | 0.0396041    | 0.0262862 | 0.0402433    | 0.0343460 | 3.0872600    | 0.0879493 |
| 15D10293            | 11.7 % | 0.0103343    | 0.0004494 | 0.0194476    | 0.0300591 | 0.0403360    | 0.0262862 | 0.0413828    | 0.0343460 | 3.0940646    | 0.0879493 |
| 15D10294            | 13.1 % | 0.0103419    | 0.0004494 | 0.0186195    | 0.0300591 | 0.0410116    | 0.0262862 | 0.0424346    | 0.0343460 | 3.1006830    | 0.0879493 |
| 15D10296            | 14.7 % | 0.0103575    | 0.0004494 | 0.0166322    | 0.0300591 | 0.0424192    | 0.0262862 | 0.0446260    | 0.0343460 | 3.1155110    | 0.0879493 |
| 15D10297            | 16.5 % | 0.0103657    | 0.0004494 | 0.0154587    | 0.0300591 | 0.0431511    | 0.0262862 | 0.0457654    | 0.0343460 | 3.1237770    | 0.0879493 |
| 15D10298            | 18.5 % | 0.0103739    | 0.0004494 | 0.0141894    | 0.0300591 | 0.0438830    | 0.0262862 | 0.0469049    | 0.0343460 | 3.1324228    | 0.0879493 |
| 15D10300            | 19.8 % | 0.0103895    | 0.0004494 | 0.0114792    | 0.0300591 | 0.0452905    | 0.0262862 | 0.0490962    | 0.0343460 | 3.1501174    | 0.0879493 |
| 15D10301            | 21.7 % | 0.0103977    | 0.0004494 | 0.0099299    | 0.0300591 | 0.0460224    | 0.0262862 | 0.0502357    | 0.0343460 | 3.1598739    | 0.0879493 |
| 15D10302            | 22.8 % | 0.0104059    | 0.0004494 | 0.0082848    | 0.0300591 | 0.0467544    | 0.0262862 | 0.0513752    | 0.0343460 | 3.1700104    | 0.0879493 |
| 15D10304            | 24.3 % | 0.0104222    | 0.0004494 | 0.0047070    | 0.0300591 | 0.0482182    | 0.0262862 | 0.0536542    | 0.0343460 | 3.1914231    | 0.0879493 |



| OSU Argon Geochronology Lab |        |           |           |        |                |         |        |        |                |           |           |        |                |          |        |        |                |          |         |        |                |    |    |  |  |
|-----------------------------|--------|-----------|-----------|--------|----------------|---------|--------|--------|----------------|-----------|-----------|--------|----------------|----------|--------|--------|----------------|----------|---------|--------|----------------|----|----|--|--|
| Intercept<br>Values         | 36Ar   |           |           |        |                | 37Ar    |        |        |                |           | 38Ar      |        |                |          |        | 39Ar   |                |          |         |        | 40Ar           |    |    |  |  |
|                             | [fA]   | 1σ        | r2        |        |                | [fA]    | 1σ     | r2     |                |           | [fA]      | 1σ     | r2             |          |        | [fA]   | 1σ             | r2       |         |        | [fA]           | 1σ | r2 |  |  |
| 15D10264                    | 2.0 %  | 0.0565834 | 0.0006072 | 0.1353 | EXP 150 of 150 | 2.2350  | 0.0325 | 0.1607 | EXP 149 of 150 | 0.2946155 | 0.0276507 | 0.0008 | EXP 150 of 150 | 30.1950  | 0.0268 | 0.9816 | EXP 150 of 150 | 19.56964 | 0.03076 | 0.9916 | EXP 150 of 150 |    |    |  |  |
| 15D10266                    | 2.2 %  | 0.0617912 | 0.0005938 | 0.0278 | EXP 150 of 150 | 3.2335  | 0.0291 | 0.2751 | EXP 150 of 150 | 0.4879361 | 0.0257510 | 0.0017 | EXP 150 of 150 | 44.9029  | 0.0278 | 0.9911 | EXP 150 of 150 | 21.51819 | 0.03006 | 0.9912 | EXP 149 of 150 |    |    |  |  |
| 15D10267                    | 2.4 %  | 0.0531109 | 0.0005461 | 0.2078 | EXP 150 of 150 | 3.5448  | 0.0262 | 0.4137 | EXP 150 of 150 | 0.5113514 | 0.0276111 | 0.0003 | EXP 150 of 150 | 49.8791  | 0.0265 | 0.9936 | EXP 150 of 150 | 19.82595 | 0.03054 | 0.9914 | EXP 150 of 150 |    |    |  |  |
| 15D10268                    | 2.6 %  | 0.0675098 | 0.0005525 | 0.1156 | EXP 150 of 150 | 6.1725  | 0.0329 | 0.5105 | EXP 150 of 150 | 0.9961150 | 0.0275098 | 0.0423 | EXP 149 of 150 | 88.0098  | 0.0351 | 0.9965 | EXP 150 of 150 | 26.60663 | 0.03092 | 0.9905 | EXP 150 of 150 |    |    |  |  |
| 15D10270                    | 2.8 %  | 0.0637392 | 0.0006181 | 0.1231 | EXP 150 of 150 | 6.7691  | 0.0305 | 0.6193 | EXP 150 of 150 | 1.0763561 | 0.0290724 | 0.0193 | EXP 150 of 150 | 96.9671  | 0.0320 | 0.9976 | EXP 150 of 150 | 25.74201 | 0.02784 | 0.9924 | EXP 150 of 150 |    |    |  |  |
| 15D10271                    | 3.0 %  | 0.0898839 | 0.0007532 | 0.0498 | EXP 150 of 150 | 13.1458 | 0.0331 | 0.8360 | EXP 150 of 150 | 2.1352340 | 0.0248023 | 0.1313 | EXP 150 of 150 | 190.0772 | 0.0405 | 0.9990 | EXP 150 of 150 | 39.85466 | 0.03232 | 0.9881 | EXP 150 of 150 |    |    |  |  |
| 15D10272                    | 3.3 %  | 0.0858609 | 0.0006248 | 0.0783 | EXP 150 of 150 | 15.2376 | 0.0314 | 0.8903 | EXP 150 of 150 | 2.5119312 | 0.0255440 | 0.3263 | EXP 150 of 150 | 215.3237 | 0.0424 | 0.9991 | EXP 150 of 150 | 39.70087 | 0.02979 | 0.9907 | EXP 150 of 150 |    |    |  |  |
| 15D10273                    | 3.6 %  | 0.1177992 | 0.0008737 | 0.0426 | EXP 150 of 150 | 27.0360 | 0.0331 | 0.9566 | EXP 150 of 150 | 4.2015761 | 0.0301537 | 0.3581 | EXP 150 of 150 | 363.0499 | 0.0464 | 0.9996 | EXP 150 of 150 | 57.81439 | 0.03451 | 0.9874 | EXP 150 of 150 |    |    |  |  |
| 15D10275                    | 3.9 %  | 0.1110760 | 0.0007922 | 0.0844 | EXP 149 of 150 | 31.0107 | 0.0294 | 0.9731 | EXP 149 of 150 | 4.6483654 | 0.0277157 | 0.5250 | EXP 150 of 150 | 395.4482 | 0.0498 | 0.9996 | EXP 150 of 150 | 56.71154 | 0.03471 | 0.9884 | EXP 150 of 150 |    |    |  |  |
| 15D10276                    | 4.3 %  | 0.0959419 | 0.0006817 | 0.1825 | EXP 150 of 150 | 29.0944 | 0.0326 | 0.9596 | EXP 150 of 150 | 4.2955945 | 0.0272967 | 0.4162 | EXP 150 of 150 | 368.8367 | 0.0462 | 0.9996 | EXP 150 of 150 | 50.07312 | 0.03164 | 0.9915 | EXP 150 of 150 |    |    |  |  |
| 15D10277                    | 4.6 %  | 0.0864775 | 0.0006328 | 0.3379 | EXP 150 of 150 | 27.6138 | 0.0317 | 0.9598 | EXP 150 of 150 | 4.1120042 | 0.0281742 | 0.4208 | EXP 150 of 150 | 352.2710 | 0.0481 | 0.9996 | EXP 150 of 150 | 46.66048 | 0.03045 | 0.9928 | EXP 150 of 150 |    |    |  |  |
| 15D10278                    | 4.9 %  | 0.1067088 | 0.0007623 | 0.2383 | EXP 150 of 150 | 34.0043 | 0.0352 | 0.9681 | EXP 150 of 150 | 5.5116672 | 0.0289559 | 0.5652 | EXP 150 of 150 | 473.2125 | 0.0524 | 0.9997 | EXP 150 of 150 | 60.46082 | 0.03210 | 0.9920 | EXP 150 of 150 |    |    |  |  |
| 15D10280                    | 5.2 %  | 0.0583641 | 0.0005427 | 0.4330 | EXP 150 of 150 | 16.6940 | 0.0340 | 0.8822 | EXP 150 of 150 | 3.0023860 | 0.0277016 | 0.2876 | EXP 150 of 150 | 257.6716 | 0.0458 | 0.9993 | EXP 150 of 150 | 33.70438 | 0.03018 | 0.9931 | EXP 150 of 150 |    |    |  |  |
| 15D10281                    | 5.5 %  | 0.0658412 | 0.0006230 | 0.2997 | EXP 150 of 150 | 16.7671 | 0.0291 | 0.9085 | EXP 150 of 150 | 3.4072092 | 0.0265924 | 0.3427 | EXP 150 of 150 | 293.5963 | 0.0456 | 0.9995 | EXP 150 of 150 | 39.44463 | 0.02838 | 0.9937 | EXP 150 of 150 |    |    |  |  |
| 15D10282                    | 5.8 %  | 0.0497806 | 0.0005370 | 0.4025 | EXP 150 of 150 | 10.8463 | 0.0327 | 0.7492 | EXP 149 of 150 | 2.3882911 | 0.0266916 | 0.2000 | EXP 150 of 150 | 205.8700 | 0.0405 | 0.9991 | EXP 150 of 150 | 28.92908 | 0.03116 | 0.9927 | EXP 150 of 150 |    |    |  |  |
| 15D10284                    | 6.1 %  | 0.0424973 | 0.0006023 | 0.4056 | EXP 150 of 150 | 8.4717  | 0.0303 | 0.7349 | EXP 150 of 150 | 1.9706793 | 0.0252091 | 0.1837 | EXP 150 of 150 | 167.6754 | 0.0366 | 0.9989 | EXP 150 of 150 | 24.71143 | 0.03237 | 0.9917 | EXP 150 of 150 |    |    |  |  |
| 15D10285                    | 6.5 %  | 0.0374281 | 0.0005389 | 0.4146 | EXP 150 of 150 | 6.1774  | 0.0295 | 0.6017 | EXP 149 of 150 | 1.4755099 | 0.0268280 | 0.0666 | EXP 150 of 150 | 125.0220 | 0.0322 | 0.9985 | EXP 150 of 150 | 20.07498 | 0.02941 | 0.9932 | EXP 150 of 150 |    |    |  |  |
| 15D10286                    | 7.0 %  | 0.0358042 | 0.0004740 | 0.4890 | EXP 150 of 150 | 5.6104  | 0.0320 | 0.5036 | EXP 150 of 150 | 1.2721102 | 0.0251360 | 0.0425 | EXP 150 of 150 | 112.0222 | 0.0330 | 0.9980 | EXP 150 of 150 | 18.77282 | 0.02976 | 0.9929 | EXP 150 of 150 |    |    |  |  |
| 15D10288                    | 7.6 %  | 0.0445307 | 0.0005373 | 0.3135 | EXP 150 of 150 | 6.4432  | 0.0290 | 0.6161 | EXP 149 of 150 | 1.4516712 | 0.0249512 | 0.0386 | EXP 150 of 150 | 127.6906 | 0.0338 | 0.9984 | EXP 150 of 150 | 22.22707 | 0.02983 | 0.9917 | EXP 150 of 150 |    |    |  |  |
| 15D10289                    | 8.4 %  | 0.0510314 | 0.0005255 | 0.3315 | EXP 150 of 150 | 7.0138  | 0.0307 | 0.6403 | EXP 149 of 150 | 1.5460503 | 0.0264119 | 0.0987 | EXP 148 of 150 | 131.7025 | 0.0342 | 0.9985 | EXP 150 of 150 | 24.37540 | 0.02873 | 0.9925 | EXP 150 of 150 |    |    |  |  |
| 15D10290                    | 9.4 %  | 0.0659087 | 0.0006252 | 0.0281 | EXP 150 of 150 | 8.6570  | 0.0288 | 0.7337 | EXP 150 of 150 | 1.8271284 | 0.0265781 | 0.1709 | EXP 150 of 150 | 150.1529 | 0.0410 | 0.9983 | EXP 150 of 150 | 29.35733 | 0.03247 | 0.9894 | EXP 150 of 150 |    |    |  |  |
| 15D10292                    | 10.5 % | 0.0758662 | 0.0007190 | 0.1125 | EXP 150 of 150 | 10.4237 | 0.0318 | 0.7706 | EXP 150 of 150 | 1.9602824 | 0.0288001 | 0.1072 | EXP 150 of 150 | 167.4559 | 0.0348 | 0.9990 | EXP 150 of 150 | 33.88740 | 0.03154 | 0.9881 | EXP 150 of 150 |    |    |  |  |
| 15D10293                    | 11.7 % | 0.0793623 | 0.0006918 | 0.0491 | EXP 150 of 150 | 10.3997 | 0.0311 | 0.8099 | EXP 150 of 150 | 1.7943201 | 0.0280671 | 0.0663 | EXP 150 of 150 | 151.3429 | 0.0320 | 0.9990 | EXP 150 of 150 | 33.46141 | 0.03005 | 0.9883 | EXP 150 of 150 |    |    |  |  |
| 15D10294                    | 13.1 % | 0.0937573 | 0.0006983 | 0.0004 | EXP 150 of 150 | 11.2752 | 0.0288 | 0.8414 | EXP 150 of 150 | 1.7436295 | 0.0286108 | 0.1015 | EXP 150 of 150 | 144.1880 | 0.0353 | 0.9986 | EXP 150 of 150 | 36.71079 | 0.03461 | 0.9819 | EXP 150 of 150 |    |    |  |  |
| 15D10296                    | 14.7 % | 0.1183507 | 0.0007762 | 0.1138 | EXP 150 of 150 | 14.0694 | 0.0336 | 0.8460 | EXP 150 of 150 | 1.7224014 | 0.0293840 | 0.1489 | EXP 150 of 150 | 139.8749 | 0.0343 | 0.9986 | EXP 150 of 150 | 41.75084 | 0.03037 | 0.9823 | EXP 150 of 150 |    |    |  |  |
| 15D10297                    | 16.5 % | 0.1635418 | 0.0009245 | 0.2750 | EXP 150 of 150 | 27.2645 | 0.0320 | 0.9566 | EXP 150 of 150 | 1.6022464 | 0.0245159 | 0.1522 | EXP 150 of 150 | 126.7295 | 0.0386 | 0.9978 | EXP 150 of 150 | 48.48283 | 0.02983 | 0.9775 | EXP 150 of 150 |    |    |  |  |
| 15D10298                    | 18.5 % | 0.1485371 | 0.0009055 | 0.2221 | EXP 150 of 150 | 24.6017 | 0.0313 | 0.9503 | EXP 149 of 150 | 0.8989182 | 0.0249560 | 0.1066 | EXP 150 of 150 | 66.5267  | 0.0302 | 0.9952 | EXP 150 of 150 | 39.80593 | 0.03460 | 0.9730 | EXP 149 of 150 |    |    |  |  |
| 15D10300                    | 19.8 % | 0.1066076 | 0.0008475 | 0.0145 | EXP 150 of 150 | 17.3336 | 0.0337 | 0.8969 | EXP 150 of 150 | 0.4448417 | 0.0257059 | 0.0063 | EXP 150 of 150 | 35.0269  | 0.0279 | 0.9847 | EXP 150 of 150 | 28.37976 | 0.02920 | 0.9844 | EXP 150 of 150 |    |    |  |  |
| 15D10301                    | 21.7 % | 0.0972693 | 0.0007415 | 0.0272 | EXP 150 of 150 | 17.0859 | 0.0336 | 0.8993 | EXP 150 of 150 | 0.2953580 | 0.0297751 | 0.0039 | EXP 150 of 150 | 22.9312  | 0.0294 | 0.9602 | EXP 150 of 150 | 24.09849 | 0.03148 | 0.9843 | EXP 150 of 150 |    |    |  |  |
| 15D10302                    | 22.8 % | 0.0767205 | 0.0006652 | 0.0151 | EXP 150 of 150 | 12.4060 | 0.0264 | 0.8702 | EXP 149 of 150 | 0.1457785 | 0.0239789 | 0.0006 | EXP 150 of 150 | 15.3817  | 0.0259 | 0.9303 | EXP 150 of 150 | 19.12331 | 0.02731 | 0.9896 | EXP 149 of 150 |    |    |  |  |
| 15D10304                    | 24.3 % | 0.0752793 | 0.0006685 | 0.0000 | EXP 150 of 150 | 13.2363 | 0.0278 | 0.8744 | EXP 150 of 150 | 0.1944092 | 0.0282765 | 0.0222 | EXP 150 of 150 | 12.7848  | 0.0247 | 0.9032 | EXP 149 of 150 | 18.24802 | 0.02885 | 0.9878 | EXP 150 of 150 |    |    |  |  |



| OSU Argon Geochronology Lab |        |        |            |                   |             |      |                  |                  |       |                     |                    |       |            |       |               |       |             |       |              |                        |     |       |      |      |     |        |             |       |       |         |
|-----------------------------|--------|--------|------------|-------------------|-------------|------|------------------|------------------|-------|---------------------|--------------------|-------|------------|-------|---------------|-------|-------------|-------|--------------|------------------------|-----|-------|------|------|-----|--------|-------------|-------|-------|---------|
| Sample Parameters           |        | Sample | Material   | Location          | Analyst     | Temp | Standard Name    | Standard (in Ma) | %1σ   | Standard Reference  | Standard 40Ar/39Ar | %1σ   | J          | %1σ   | Air 40Ar/36Ar | %1σ   | MDF (lin)   | %1σ   | Volume Ratio | Sensitivity (mol/volt) | Day | Month | Year | Hour | Min | Resist | Irradiation | X-pos | Y-pos | Z/H-pos |
| 15D10264                    | 2.0 %  | 154-1  | Groundmass | Kerguelen Plateau | Dan Miggins | 2    | FCT-NM (7B26-14) | 28.201           | 0.082 | Kuiper et al (2008) | 8.95301            | 0.115 | 0.00175554 | 0.115 | 303.357       | 0.116 | 0.993516587 | 0.065 | 1            | 4.8E-14                | 2   | APR   | 2015 | 18   | 52  | 1      | 14-OSU-07   | 0.00  | 0.00  | 37.15   |
| 15D10266                    | 2.2 %  | 154-1  | Groundmass | Kerguelen Plateau | Dan Miggins | 2.2  | FCT-NM (7B26-14) | 28.201           | 0.082 | Kuiper et al (2008) | 8.95301            | 0.115 | 0.00175554 | 0.115 | 303.357       | 0.116 | 0.993516587 | 0.065 | 1            | 4.8E-14                | 2   | APR   | 2015 | 19   | 19  | 1      | 14-OSU-07   | 0.00  | 0.00  | 37.15   |
| 15D10267                    | 2.4 %  | 154-1  | Groundmass | Kerguelen Plateau | Dan Miggins | 2.4  | FCT-NM (7B26-14) | 28.201           | 0.082 | Kuiper et al (2008) | 8.95301            | 0.115 | 0.00175554 | 0.115 | 303.357       | 0.116 | 0.993516587 | 0.065 | 1            | 4.8E-14                | 2   | APR   | 2015 | 19   | 33  | 1      | 14-OSU-07   | 0.00  | 0.00  | 37.15   |
| 15D10268                    | 2.6 %  | 154-1  | Groundmass | Kerguelen Plateau | Dan Miggins | 2.6  | FCT-NM (7B26-14) | 28.201           | 0.082 | Kuiper et al (2008) | 8.95301            | 0.115 | 0.00175554 | 0.115 | 303.357       | 0.116 | 0.993516587 | 0.065 | 1            | 4.8E-14                | 2   | APR   | 2015 | 19   | 48  | 1      | 14-OSU-07   | 0.00  | 0.00  | 37.15   |
| 15D10270                    | 2.8 %  | 154-1  | Groundmass | Kerguelen Plateau | Dan Miggins | 2.8  | FCT-NM (7B26-14) | 28.201           | 0.082 | Kuiper et al (2008) | 8.95301            | 0.115 | 0.00175554 | 0.115 | 303.357       | 0.116 | 0.993516587 | 0.065 | 1            | 4.8E-14                | 2   | APR   | 2015 | 20   | 14  | 1      | 14-OSU-07   | 0.00  | 0.00  | 37.15   |
| 15D10271                    | 3.0 %  | 154-1  | Groundmass | Kerguelen Plateau | Dan Miggins | 3    | FCT-NM (7B26-14) | 28.201           | 0.082 | Kuiper et al (2008) | 8.95301            | 0.115 | 0.00175554 | 0.115 | 303.357       | 0.116 | 0.993516587 | 0.065 | 1            | 4.8E-14                | 2   | APR   | 2015 | 20   | 28  | 1      | 14-OSU-07   | 0.00  | 0.00  | 37.15   |
| 15D10272                    | 3.3 %  | 154-1  | Groundmass | Kerguelen Plateau | Dan Miggins | 3.3  | FCT-NM (7B26-14) | 28.201           | 0.082 | Kuiper et al (2008) | 8.95301            | 0.115 | 0.00175554 | 0.115 | 303.357       | 0.116 | 0.993516587 | 0.065 | 1            | 4.8E-14                | 2   | APR   | 2015 | 20   | 42  | 1      | 14-OSU-07   | 0.00  | 0.00  | 37.15   |
| 15D10273                    | 3.6 %  | 154-1  | Groundmass | Kerguelen Plateau | Dan Miggins | 3.6  | FCT-NM (7B26-14) | 28.201           | 0.082 | Kuiper et al (2008) | 8.95301            | 0.115 | 0.00175554 | 0.115 | 303.357       | 0.116 | 0.993516587 | 0.065 | 1            | 4.8E-14                | 2   | APR   | 2015 | 20   | 56  | 1      | 14-OSU-07   | 0.00  | 0.00  | 37.15   |
| 15D10275                    | 3.9 %  | 154-1  | Groundmass | Kerguelen Plateau | Dan Miggins | 3.9  | FCT-NM (7B26-14) | 28.201           | 0.082 | Kuiper et al (2008) | 8.95301            | 0.115 | 0.00175554 | 0.115 | 303.357       | 0.116 | 0.993516587 | 0.065 | 1            | 4.8E-14                | 2   | APR   | 2015 | 21   | 22  | 1      | 14-OSU-07   | 0.00  | 0.00  | 37.15   |
| 15D10276                    | 4.3 %  | 154-1  | Groundmass | Kerguelen Plateau | Dan Miggins | 4.3  | FCT-NM (7B26-14) | 28.201           | 0.082 | Kuiper et al (2008) | 8.95301            | 0.115 | 0.00175554 | 0.115 | 303.357       | 0.116 | 0.993516587 | 0.065 | 1            | 4.8E-14                | 2   | APR   | 2015 | 21   | 35  | 1      | 14-OSU-07   | 0.00  | 0.00  | 37.15   |
| 15D10277                    | 4.6 %  | 154-1  | Groundmass | Kerguelen Plateau | Dan Miggins | 4.6  | FCT-NM (7B26-14) | 28.201           | 0.082 | Kuiper et al (2008) | 8.95301            | 0.115 | 0.00175554 | 0.115 | 303.357       | 0.116 | 0.993516587 | 0.065 | 1            | 4.8E-14                | 2   | APR   | 2015 | 21   | 48  | 1      | 14-OSU-07   | 0.00  | 0.00  | 37.15   |
| 15D10278                    | 4.9 %  | 154-1  | Groundmass | Kerguelen Plateau | Dan Miggins | 4.9  | FCT-NM (7B26-14) | 28.201           | 0.082 | Kuiper et al (2008) | 8.95301            | 0.115 | 0.00175554 | 0.115 | 303.357       | 0.116 | 0.993516587 | 0.065 | 1            | 4.8E-14                | 2   | APR   | 2015 | 22   | 0   | 1      | 14-OSU-07   | 0.00  | 0.00  | 37.15   |
| 15D10280                    | 5.2 %  | 154-1  | Groundmass | Kerguelen Plateau | Dan Miggins | 5.2  | FCT-NM (7B26-14) | 28.201           | 0.082 | Kuiper et al (2008) | 8.95301            | 0.115 | 0.00175554 | 0.115 | 303.357       | 0.116 | 0.993516587 | 0.065 | 1            | 4.8E-14                | 2   | APR   | 2015 | 22   | 25  | 1      | 14-OSU-07   | 0.00  | 0.00  | 37.15   |
| 15D10281                    | 5.5 %  | 154-1  | Groundmass | Kerguelen Plateau | Dan Miggins | 5.5  | FCT-NM (7B26-14) | 28.201           | 0.082 | Kuiper et al (2008) | 8.95301            | 0.115 | 0.00175554 | 0.115 | 303.357       | 0.116 | 0.993516587 | 0.065 | 1            | 4.8E-14                | 2   | APR   | 2015 | 22   | 38  | 1      | 14-OSU-07   | 0.00  | 0.00  | 37.15   |
| 15D10282                    | 5.8 %  | 154-1  | Groundmass | Kerguelen Plateau | Dan Miggins | 5.8  | FCT-NM (7B26-14) | 28.201           | 0.082 | Kuiper et al (2008) | 8.95301            | 0.115 | 0.00175554 | 0.115 | 303.357       | 0.116 | 0.993516587 | 0.065 | 1            | 4.8E-14                | 2   | APR   | 2015 | 22   | 50  | 1      | 14-OSU-07   | 0.00  | 0.00  | 37.15   |
| 15D10284                    | 6.1 %  | 154-1  | Groundmass | Kerguelen Plateau | Dan Miggins | 6.1  | FCT-NM (7B26-14) | 28.201           | 0.082 | Kuiper et al (2008) | 8.95301            | 0.115 | 0.00175554 | 0.115 | 303.357       | 0.116 | 0.993516587 | 0.065 | 1            | 4.8E-14                | 2   | APR   | 2015 | 23   | 15  | 1      | 14-OSU-07   | 0.00  | 0.00  | 37.15   |
| 15D10285                    | 6.5 %  | 154-1  | Groundmass | Kerguelen Plateau | Dan Miggins | 6.5  | FCT-NM (7B26-14) | 28.201           | 0.082 | Kuiper et al (2008) | 8.95301            | 0.115 | 0.00175554 | 0.115 | 303.357       | 0.116 | 0.993516587 | 0.065 | 1            | 4.8E-14                | 2   | APR   | 2015 | 23   | 28  | 1      | 14-OSU-07   | 0.00  | 0.00  | 37.15   |
| 15D10286                    | 7.0 %  | 154-1  | Groundmass | Kerguelen Plateau | Dan Miggins | 7    | FCT-NM (7B26-14) | 28.201           | 0.082 | Kuiper et al (2008) | 8.95301            | 0.115 | 0.00175554 | 0.115 | 303.357       | 0.116 | 0.993516587 | 0.065 | 1            | 4.8E-14                | 2   | APR   | 2015 | 23   | 40  | 1      | 14-OSU-07   | 0.00  | 0.00  | 37.15   |
| 15D10288                    | 7.6 %  | 154-1  | Groundmass | Kerguelen Plateau | Dan Miggins | 7.6  | FCT-NM (7B26-14) | 28.201           | 0.082 | Kuiper et al (2008) | 8.95301            | 0.115 | 0.00175554 | 0.115 | 303.357       | 0.116 | 0.993516587 | 0.065 | 1            | 4.8E-14                | 3   | APR   | 2015 | 0    | 5   | 1      | 14-OSU-07   | 0.00  | 0.00  | 37.15   |
| 15D10289                    | 8.4 %  | 154-1  | Groundmass | Kerguelen Plateau | Dan Miggins | 8.4  | FCT-NM (7B26-14) | 28.201           | 0.082 | Kuiper et al (2008) | 8.95301            | 0.115 | 0.00175554 | 0.115 | 303.357       | 0.116 | 0.993516587 | 0.065 | 1            | 4.8E-14                | 3   | APR   | 2015 | 0    | 18  | 1      | 14-OSU-07   | 0.00  | 0.00  | 37.15   |
| 15D10290                    | 9.4 %  | 154-1  | Groundmass | Kerguelen Plateau | Dan Miggins | 9.4  | FCT-NM (7B26-14) | 28.201           | 0.082 | Kuiper et al (2008) | 8.95301            | 0.115 | 0.00175554 | 0.115 | 303.357       | 0.116 | 0.993516587 | 0.065 | 1            | 4.8E-14                | 3   | APR   | 2015 | 0    | 30  | 1      | 14-OSU-07   | 0.00  | 0.00  | 37.15   |
| 15D10292                    | 10.5 % | 154-1  | Groundmass | Kerguelen Plateau | Dan Miggins | 10.5 | FCT-NM (7B26-14) | 28.201           | 0.082 | Kuiper et al (2008) | 8.95301            | 0.115 | 0.00175554 | 0.115 | 303.357       | 0.116 | 0.993516587 | 0.065 | 1            | 4.8E-14                | 3   | APR   | 2015 | 0    | 55  | 1      | 14-OSU-07   | 0.00  | 0.00  | 37.15   |
| 15D10293                    | 11.7 % | 154-1  | Groundmass | Kerguelen Plateau | Dan Miggins | 11.7 | FCT-NM (7B26-14) | 28.201           | 0.082 | Kuiper et al (2008) | 8.95301            | 0.115 | 0.00175554 | 0.115 | 303.357       | 0.116 | 0.993516587 | 0.065 | 1            | 4.8E-14                | 3   | APR   | 2015 | 1    | 8   | 1      | 14-OSU-07   | 0.00  | 0.00  | 37.15   |
| 15D10294                    | 13.1 % | 154-1  | Groundmass | Kerguelen Plateau | Dan Miggins | 13.1 | FCT-NM (7B26-14) | 28.201           | 0.082 | Kuiper et al (2008) | 8.95301            | 0.115 | 0.00175554 | 0.115 | 303.357       | 0.116 | 0.993516587 | 0.065 | 1            | 4.8E-14                | 3   | APR   | 2015 | 1    | 20  | 1      | 14-OSU-07   | 0.00  | 0.00  | 37.15   |
| 15D10296                    | 14.7 % | 154-1  | Groundmass | Kerguelen Plateau | Dan Miggins | 14.7 | FCT-NM (7B26-14) | 28.201           | 0.082 | Kuiper et al (2008) | 8.95301            | 0.115 | 0.00175554 | 0.115 | 303.357       | 0.116 | 0.993516587 | 0.065 | 1            | 4.8E-14                | 3   | APR   | 2015 | 1    | 45  | 1      | 14-OSU-07   | 0.00  | 0.00  | 37.15   |
| 15D10297                    | 16.5 % | 154-1  | Groundmass | Kerguelen Plateau | Dan Miggins | 16.5 | FCT-NM (7B26-14) | 28.201           | 0.082 | Kuiper et al (2008) | 8.95301            | 0.115 | 0.00175554 | 0.115 | 303.357       | 0.116 | 0.993516587 | 0.065 | 1            | 4.8E-14                | 3   | APR   | 2015 | 1    | 58  | 1      | 14-OSU-07   | 0.00  | 0.00  | 37.15   |
| 15D10298                    | 18.5 % | 154-1  | Groundmass | Kerguelen Plateau | Dan Miggins | 18.5 | FCT-NM (7B26-14) | 28.201           | 0.082 | Kuiper et al (2008) | 8.95301            | 0.115 | 0.00175554 | 0.115 | 303.357       | 0.116 | 0.993516587 | 0.065 | 1            | 4.8E-14                | 3   | APR   | 2015 | 2    | 11  | 1      | 14-OSU-07   | 0.00  | 0.00  | 37.15   |
| 15D10300                    | 19.8 % | 154-1  | Groundmass | Kerguelen Plateau | Dan Miggins | 19.8 | FCT-NM (7B26-14) | 28.201           | 0.082 | Kuiper et al (2008) | 8.95301            | 0.115 | 0.00175554 | 0.115 | 303.357       | 0.116 | 0.993516587 | 0.065 | 1            | 4.8E-14                | 3   | APR   | 2015 | 2    | 36  | 1      | 14-OSU-07   | 0.00  | 0.00  | 37.15   |
| 15D10301                    | 21.7 % | 154-1  | Groundmass | Kerguelen Plateau | Dan Miggins | 21.7 | FCT-NM (7B26-14) | 28.201           | 0.082 | Kuiper et al (2008) | 8.95301            | 0.115 | 0.00175554 | 0.115 | 303.357       | 0.116 | 0.993516587 | 0.065 | 1            | 4.8E-14                | 3   | APR   | 2015 | 2    | 49  | 1      | 14-OSU-07   | 0.00  | 0.00  | 37.15   |
| 15D10302                    | 22.8 % | 154-1  | Groundmass | Kerguelen Plateau | Dan Miggins | 22.8 | FCT-NM (7B26-14) | 28.201           | 0.082 | Kuiper et al (2008) | 8.95301            | 0.115 | 0.00175554 | 0.115 | 303.357       | 0.116 | 0.993516587 | 0.065 | 1            | 4.8E-14                | 3   | APR   | 2015 | 3    | 2   | 1      | 14-OSU-07   | 0.00  | 0.00  | 37.15   |
| 15D10304                    | 24.3 % | 154-1  | Groundmass | Kerguelen Plateau | Dan Miggins | 24.3 | FCT-NM (7B26-14) | 28.201           | 0.082 | Kuiper et al (2008) | 8.95301            | 0.115 | 0.00175554 | 0.115 | 303.357       | 0.116 | 0.993516587 | 0.065 | 1            | 4.8E-14                | 3   | APR   | 2015 | 3    | 28  | 1      | 14-OSU-07   | 0.00  | 0.00  | 37.15   |



[illegible]



| OSU Argon Geochronology Lab |          |       |          |       |          |        |          |       |           |          |           |           |           |          |          |         |          |         |           |     |      |      |      |     |       |     |   |
|-----------------------------|----------|-------|----------|-------|----------|--------|----------|-------|-----------|----------|-----------|-----------|-----------|----------|----------|---------|----------|---------|-----------|-----|------|------|------|-----|-------|-----|---|
| Irradiation<br>Constants    |          |       |          |       |          |        |          |       |           |          |           |           |           |          |          |         |          |         |           |     |      |      |      |     |       |     |   |
|                             | 40/36(a) | %1σ   | 40/36(c) | %1σ   | 38/36(a) | %1σ    | 38/36(c) | %1σ   | 39/37(ca) | %1σ      | 38/37(ca) | %1σ       | 36/37(ca) | %1σ      | 40/39(k) | %1σ     | 38/39(k) | %1σ     | 36/38(cl) | %1σ | K/Ca | %1σ  | K/Cl | %1σ | Ca/Cl | %1σ |   |
| 15D10264                    | 2.0 %    | 295.5 | 0        | 0.018 | 35       | 0.1869 | 0        | 1.493 | 3         | 0.000673 | 0         | 0.0000139 | 0         | 0.000264 | 0        | 0.00101 | 0        | 0.01138 | 0         | 0   | 0    | 0.43 | 0    | 0   | 0     | 0   | 0 |
| 15D10266                    | 2.2 %    | 295.5 | 0        | 0.018 | 35       | 0.1869 | 0        | 1.493 | 3         | 0.000673 | 0         | 0.0000139 | 0         | 0.000264 | 0        | 0.00101 | 0        | 0.01138 | 0         | 0   | 0    | 0.43 | 0    | 0   | 0     | 0   | 0 |
| 15D10267                    | 2.4 %    | 295.5 | 0        | 0.018 | 35       | 0.1869 | 0        | 1.493 | 3         | 0.000673 | 0         | 0.0000139 | 0         | 0.000264 | 0        | 0.00101 | 0        | 0.01138 | 0         | 0   | 0    | 0.43 | 0    | 0   | 0     | 0   | 0 |
| 15D10268                    | 2.6 %    | 295.5 | 0        | 0.018 | 35       | 0.1869 | 0        | 1.493 | 3         | 0.000673 | 0         | 0.0000139 | 0         | 0.000264 | 0        | 0.00101 | 0        | 0.01138 | 0         | 0   | 0    | 0.43 | 0    | 0   | 0     | 0   | 0 |
| 15D10270                    | 2.8 %    | 295.5 | 0        | 0.018 | 35       | 0.1869 | 0        | 1.493 | 3         | 0.000673 | 0         | 0.0000139 | 0         | 0.000264 | 0        | 0.00101 | 0        | 0.01138 | 0         | 0   | 0    | 0.43 | 0    | 0   | 0     | 0   | 0 |
| 15D10271                    | 3.0 %    | 295.5 | 0        | 0.018 | 35       | 0.1869 | 0        | 1.493 | 3         | 0.000673 | 0         | 0.0000139 | 0         | 0.000264 | 0        | 0.00101 | 0        | 0.01138 | 0         | 0   | 0    | 0.43 | 0    | 0   | 0     | 0   | 0 |
| 15D10272                    | 3.3 %    | 295.5 | 0        | 0.018 | 35       | 0.1869 | 0        | 1.493 | 3         | 0.000673 | 0         | 0.0000139 | 0         | 0.000264 | 0        | 0.00101 | 0        | 0.01138 | 0         | 0   | 0    | 0.43 | 0    | 0   | 0     | 0   | 0 |
| 15D10273                    | 3.6 %    | 295.5 | 0        | 0.018 | 35       | 0.1869 | 0        | 1.493 | 3         | 0.000673 | 0         | 0.0000139 | 0         | 0.000264 | 0        | 0.00101 | 0        | 0.01138 | 0         | 0   | 0    | 0.43 | 0    | 0   | 0     | 0   | 0 |
| 15D10275                    | 3.9 %    | 295.5 | 0        | 0.018 | 35       | 0.1869 | 0        | 1.493 | 3         | 0.000673 | 0         | 0.0000139 | 0         | 0.000264 | 0        | 0.00101 | 0        | 0.01138 | 0         | 0   | 0    | 0.43 | 0    | 0   | 0     | 0   | 0 |
| 15D10276                    | 4.3 %    | 295.5 | 0        | 0.018 | 35       | 0.1869 | 0        | 1.493 | 3         | 0.000673 | 0         | 0.0000139 | 0         | 0.000264 | 0        | 0.00101 | 0        | 0.01138 | 0         | 0   | 0    | 0.43 | 0    | 0   | 0     | 0   | 0 |
| 15D10277                    | 4.6 %    | 295.5 | 0        | 0.018 | 35       | 0.1869 | 0        | 1.493 | 3         | 0.000673 | 0         | 0.0000139 | 0         | 0.000264 | 0        | 0.00101 | 0        | 0.01138 | 0         | 0   | 0    | 0.43 | 0    | 0   | 0     | 0   | 0 |
| 15D10278                    | 4.9 %    | 295.5 | 0        | 0.018 | 35       | 0.1869 | 0        | 1.493 | 3         | 0.000673 | 0         | 0.0000139 | 0         | 0.000264 | 0        | 0.00101 | 0        | 0.01138 | 0         | 0   | 0    | 0.43 | 0    | 0   | 0     | 0   | 0 |
| 15D10280                    | 5.2 %    | 295.5 | 0        | 0.018 | 35       | 0.1869 | 0        | 1.493 | 3         | 0.000673 | 0         | 0.0000139 | 0         | 0.000264 | 0        | 0.00101 | 0        | 0.01138 | 0         | 0   | 0    | 0.43 | 0    | 0   | 0     | 0   | 0 |
| 15D10281                    | 5.5 %    | 295.5 | 0        | 0.018 | 35       | 0.1869 | 0        | 1.493 | 3         | 0.000673 | 0         | 0.0000139 | 0         | 0.000264 | 0        | 0.00101 | 0        | 0.01138 | 0         | 0   | 0    | 0.43 | 0    | 0   | 0     | 0   | 0 |
| 15D10282                    | 5.8 %    | 295.5 | 0        | 0.018 | 35       | 0.1869 | 0        | 1.493 | 3         | 0.000673 | 0         | 0.0000139 | 0         | 0.000264 | 0        | 0.00101 | 0        | 0.01138 | 0         | 0   | 0    | 0.43 | 0    | 0   | 0     | 0   | 0 |
| 15D10284                    | 6.1 %    | 295.5 | 0        | 0.018 | 35       | 0.1869 | 0        | 1.493 | 3         | 0.000673 | 0         | 0.0000139 | 0         | 0.000264 | 0        | 0.00101 | 0        | 0.01138 | 0         | 0   | 0    | 0.43 | 0    | 0   | 0     | 0   | 0 |
| 15D10285                    | 6.5 %    | 295.5 | 0        | 0.018 | 35       | 0.1869 | 0        | 1.493 | 3         | 0.000673 | 0         | 0.0000139 | 0         | 0.000264 | 0        | 0.00101 | 0        | 0.01138 | 0         | 0   | 0    | 0.43 | 0    | 0   | 0     | 0   | 0 |
| 15D10286                    | 7.0 %    | 295.5 | 0        | 0.018 | 35       | 0.1869 | 0        | 1.493 | 3         | 0.000673 | 0         | 0.0000139 | 0         | 0.000264 | 0        | 0.00101 | 0        | 0.01138 | 0         | 0   | 0    | 0.43 | 0    | 0   | 0     | 0   | 0 |
| 15D10288                    | 7.6 %    | 295.5 | 0        | 0.018 | 35       | 0.1869 | 0        | 1.493 | 3         | 0.000673 | 0         | 0.0000139 | 0         | 0.000264 | 0        | 0.00101 | 0        | 0.01138 | 0         | 0   | 0    | 0.43 | 0    | 0   | 0     | 0   | 0 |
| 15D10289                    | 8.4 %    | 295.5 | 0        | 0.018 | 35       | 0.1869 | 0        | 1.493 | 3         | 0.000673 | 0         | 0.0000139 | 0         | 0.000264 | 0        | 0.00101 | 0        | 0.01138 | 0         | 0   | 0    | 0.43 | 0    | 0   | 0     | 0   | 0 |
| 15D10290                    | 9.4 %    | 295.5 | 0        | 0.018 | 35       | 0.1869 | 0        | 1.493 | 3         | 0.000673 | 0         | 0.0000139 | 0         | 0.000264 | 0        | 0.00101 | 0        | 0.01138 | 0         | 0   | 0    | 0.43 | 0    | 0   | 0     | 0   | 0 |
| 15D10292                    | 10.5 %   | 295.5 | 0        | 0.018 | 35       | 0.1869 | 0        | 1.493 | 3         | 0.000673 | 0         | 0.0000139 | 0         | 0.000264 | 0        | 0.00101 | 0        | 0.01138 | 0         | 0   | 0    | 0.43 | 0    | 0   | 0     | 0   | 0 |
| 15D10293                    | 11.7 %   | 295.5 | 0        | 0.018 | 35       | 0.1869 | 0        | 1.493 | 3         | 0.000673 | 0         | 0.0000139 | 0         | 0.000264 | 0        | 0.00101 | 0        | 0.01138 | 0         | 0   | 0    | 0.43 | 0    | 0   | 0     | 0   | 0 |
| 15D10294                    | 13.1 %   | 295.5 | 0        | 0.018 | 35       | 0.1869 | 0        | 1.493 | 3         | 0.000673 | 0         | 0.0000139 | 0         | 0.000264 | 0        | 0.00101 | 0        | 0.01138 | 0         | 0   | 0    | 0.43 | 0    | 0   | 0     | 0   | 0 |
| 15D10296                    | 14.7 %   | 295.5 | 0        | 0.018 | 35       | 0.1869 | 0        | 1.493 | 3         | 0.000673 | 0         | 0.0000139 | 0         | 0.000264 | 0        | 0.00101 | 0        | 0.01138 | 0         | 0   | 0    | 0.43 | 0    | 0   | 0     | 0   | 0 |
| 15D10297                    | 16.5 %   | 295.5 | 0        | 0.018 | 35       | 0.1869 | 0        | 1.493 | 3         | 0.000673 | 0         | 0.0000139 | 0         | 0.000264 | 0        | 0.00101 | 0        | 0.01138 | 0         | 0   | 0    | 0.43 | 0    | 0   | 0     | 0   | 0 |
| 15D10298                    | 18.5 %   | 295.5 | 0        | 0.018 | 35       | 0.1869 | 0        | 1.493 | 3         | 0.000673 | 0         | 0.0000139 | 0         | 0.000264 | 0        | 0.00101 | 0        | 0.01138 | 0         | 0   | 0    | 0.43 | 0    | 0   | 0     | 0   | 0 |
| 15D10300                    | 19.8 %   | 295.5 | 0        | 0.018 | 35       | 0.1869 | 0        | 1.493 | 3         | 0.000673 | 0         | 0.0000139 | 0         | 0.000264 | 0        | 0.00101 | 0        | 0.01138 | 0         | 0   | 0    | 0.43 | 0    | 0   | 0     | 0   | 0 |
| 15D10301                    | 21.7 %   | 295.5 | 0        | 0.018 | 35       | 0.1869 | 0        | 1.493 | 3         | 0.000673 | 0         | 0.0000139 | 0         | 0.000264 | 0        | 0.00101 | 0        | 0.01138 | 0         | 0   | 0    | 0.43 | 0    | 0   | 0     | 0   | 0 |
| 15D10302                    | 22.8 %   | 295.5 | 0        | 0.018 | 35       | 0.1869 | 0        | 1.493 | 3         | 0.000673 | 0         | 0.0000139 | 0         | 0.000264 | 0        | 0.00101 | 0        | 0.01138 | 0         | 0   | 0    | 0.43 | 0    | 0   | 0     | 0   | 0 |
| 15D10304                    | 24.3 %   | 295.5 | 0        | 0.018 | 35       | 0.1869 | 0        | 1.493 | 3         | 0.000673 | 0         | 0.0000139 | 0         | 0.000264 | 0        | 0.00101 | 0        | 0.01138 | 0         | 0   | 0    | 0.43 | 0    | 0   | 0     | 0   | 0 |



15D10263.AGE >>> 154-1 >>> KERGUELEN | FALLOON (14-PIL-01) PROJECT

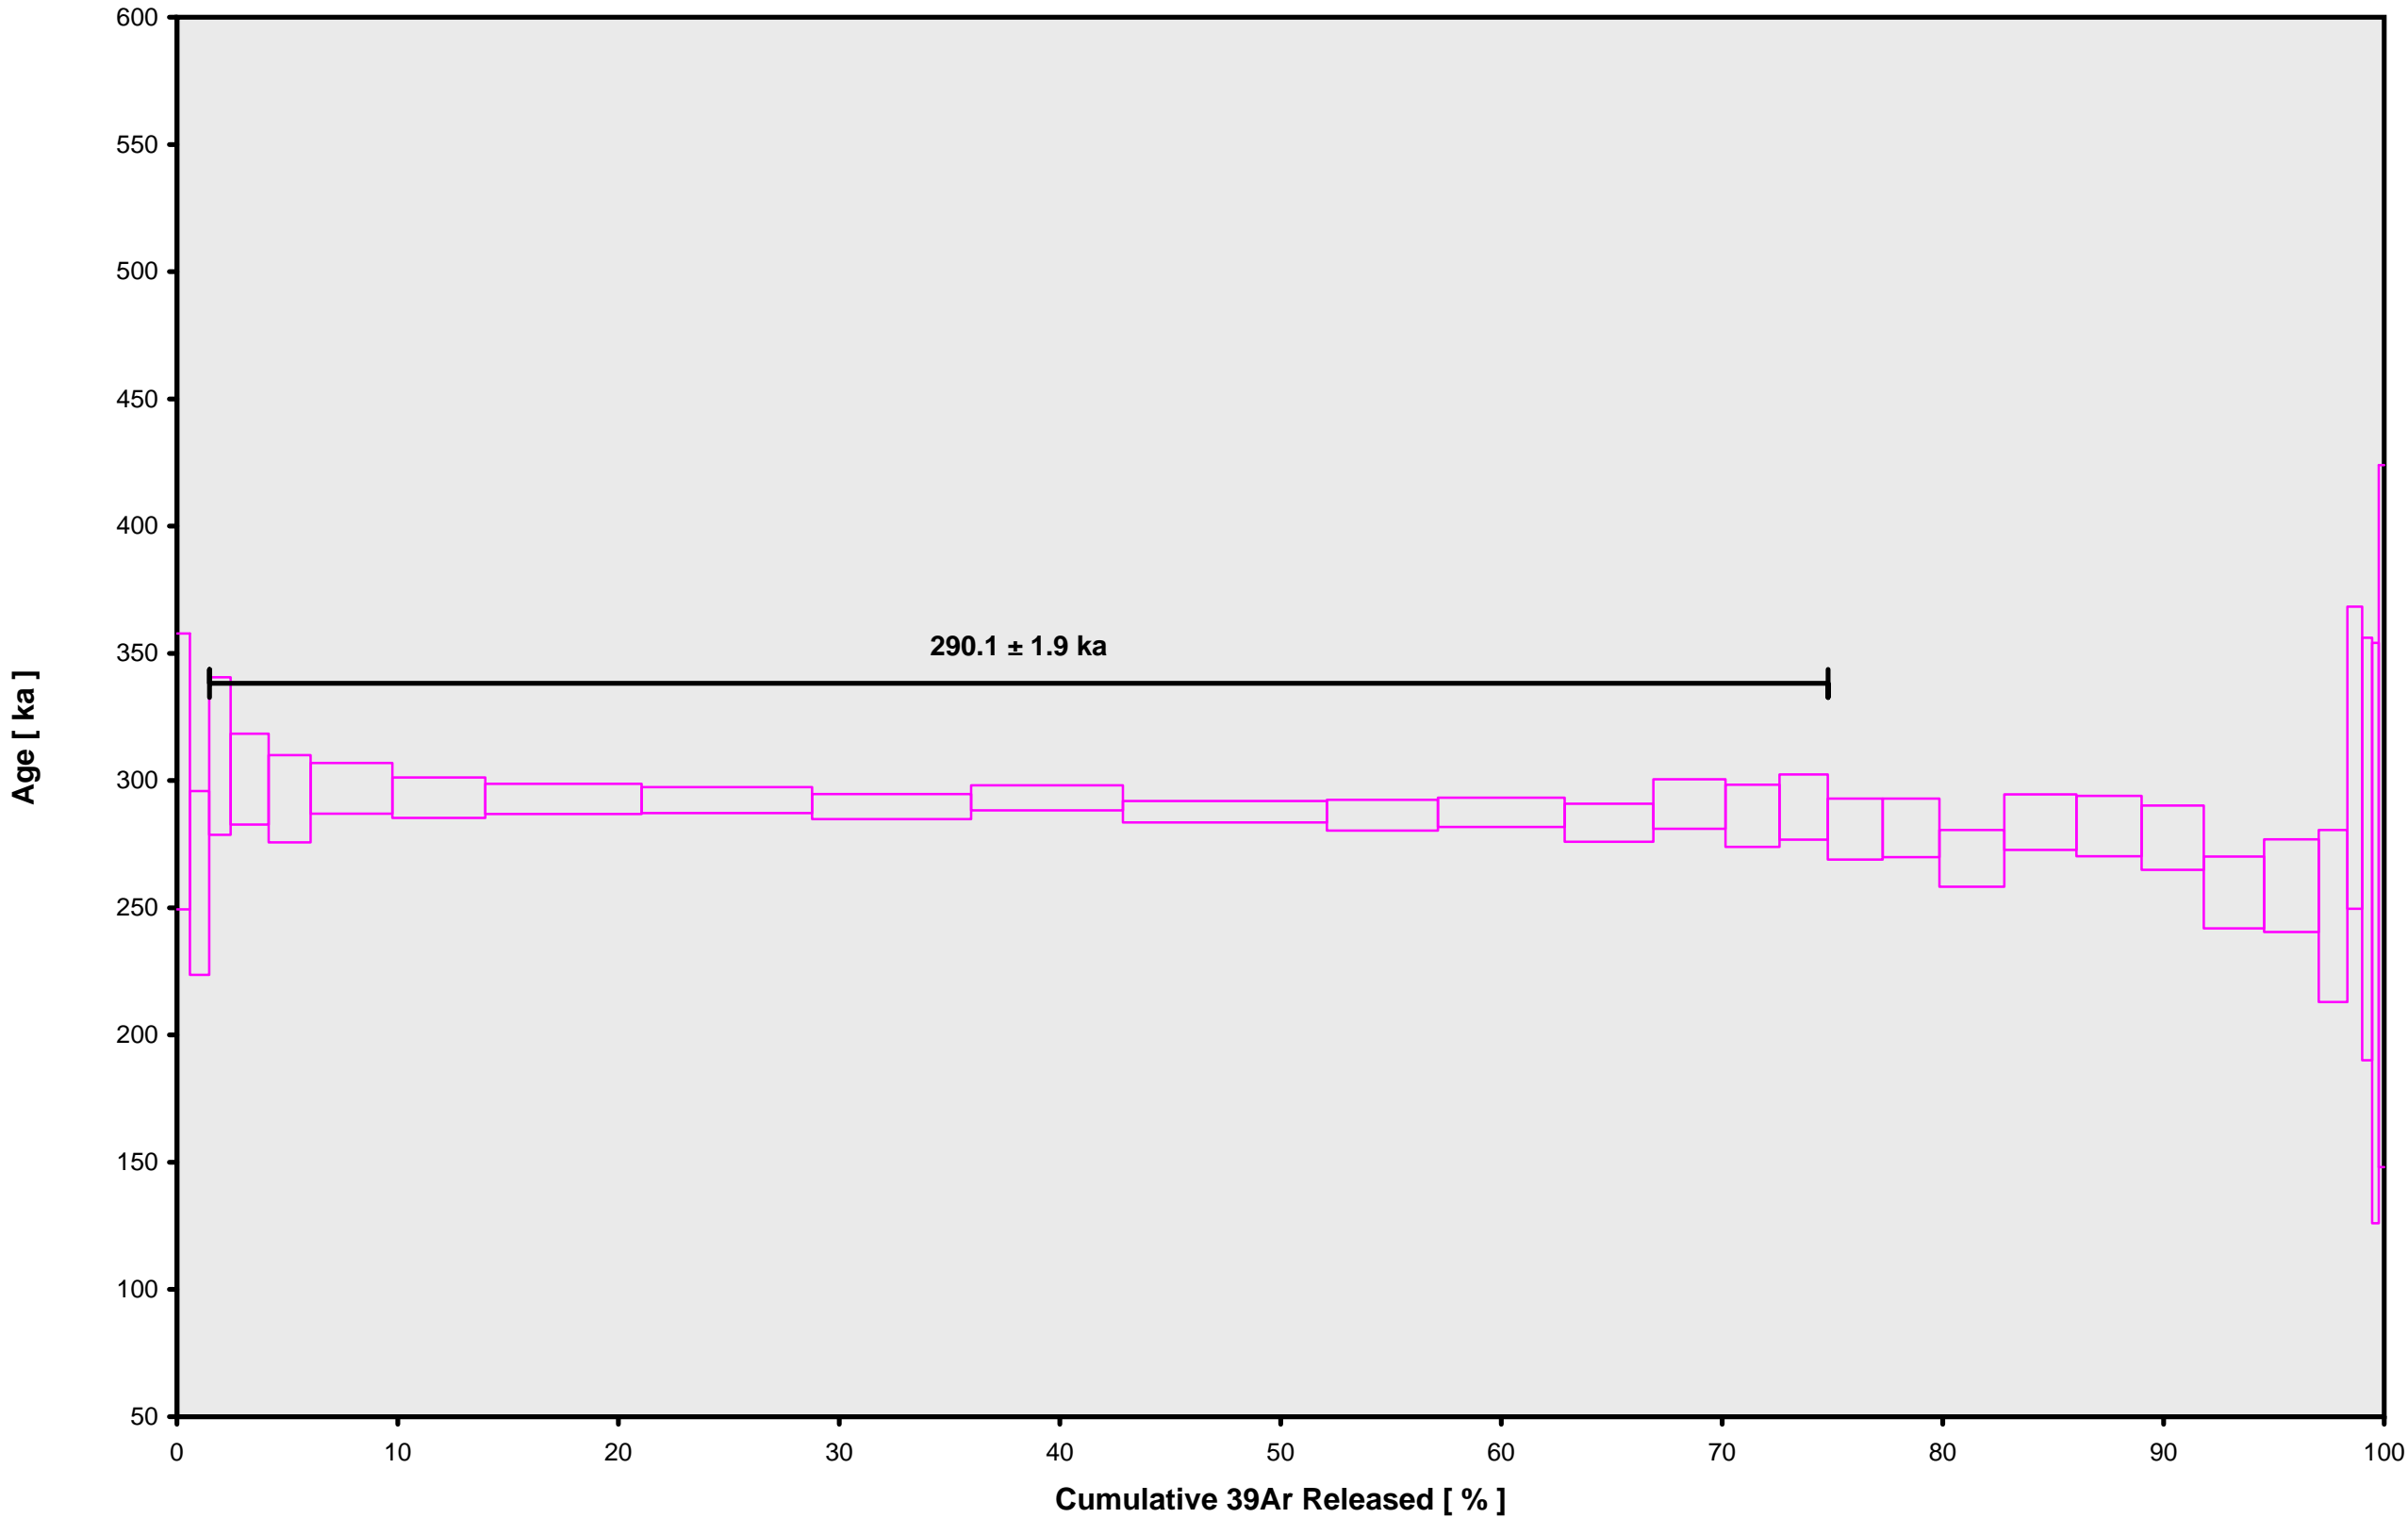

Ar-Ages in ka

WEIGHTED PLATEAU

290.1 ± 1.9

TOTAL FUSION

286.1 ± 2.0

NORMAL ISOCHRON

285.9 ± 3.5

INVERSE ISOCHRON

286.2 ± 3.5

MSWD (PROBABILITY)

1.07 (38%)

Sample Info

Groundmass

Kerguelen Plateau

Dan Miggins

IRR = 14-OSU-07 (7B26-14)

J = 0.00175554 ± 0.00000202



15D10263.AGE >>> 154-1 >>> KERGUELEN | FALLOON (14-PIL-01) PROJECT

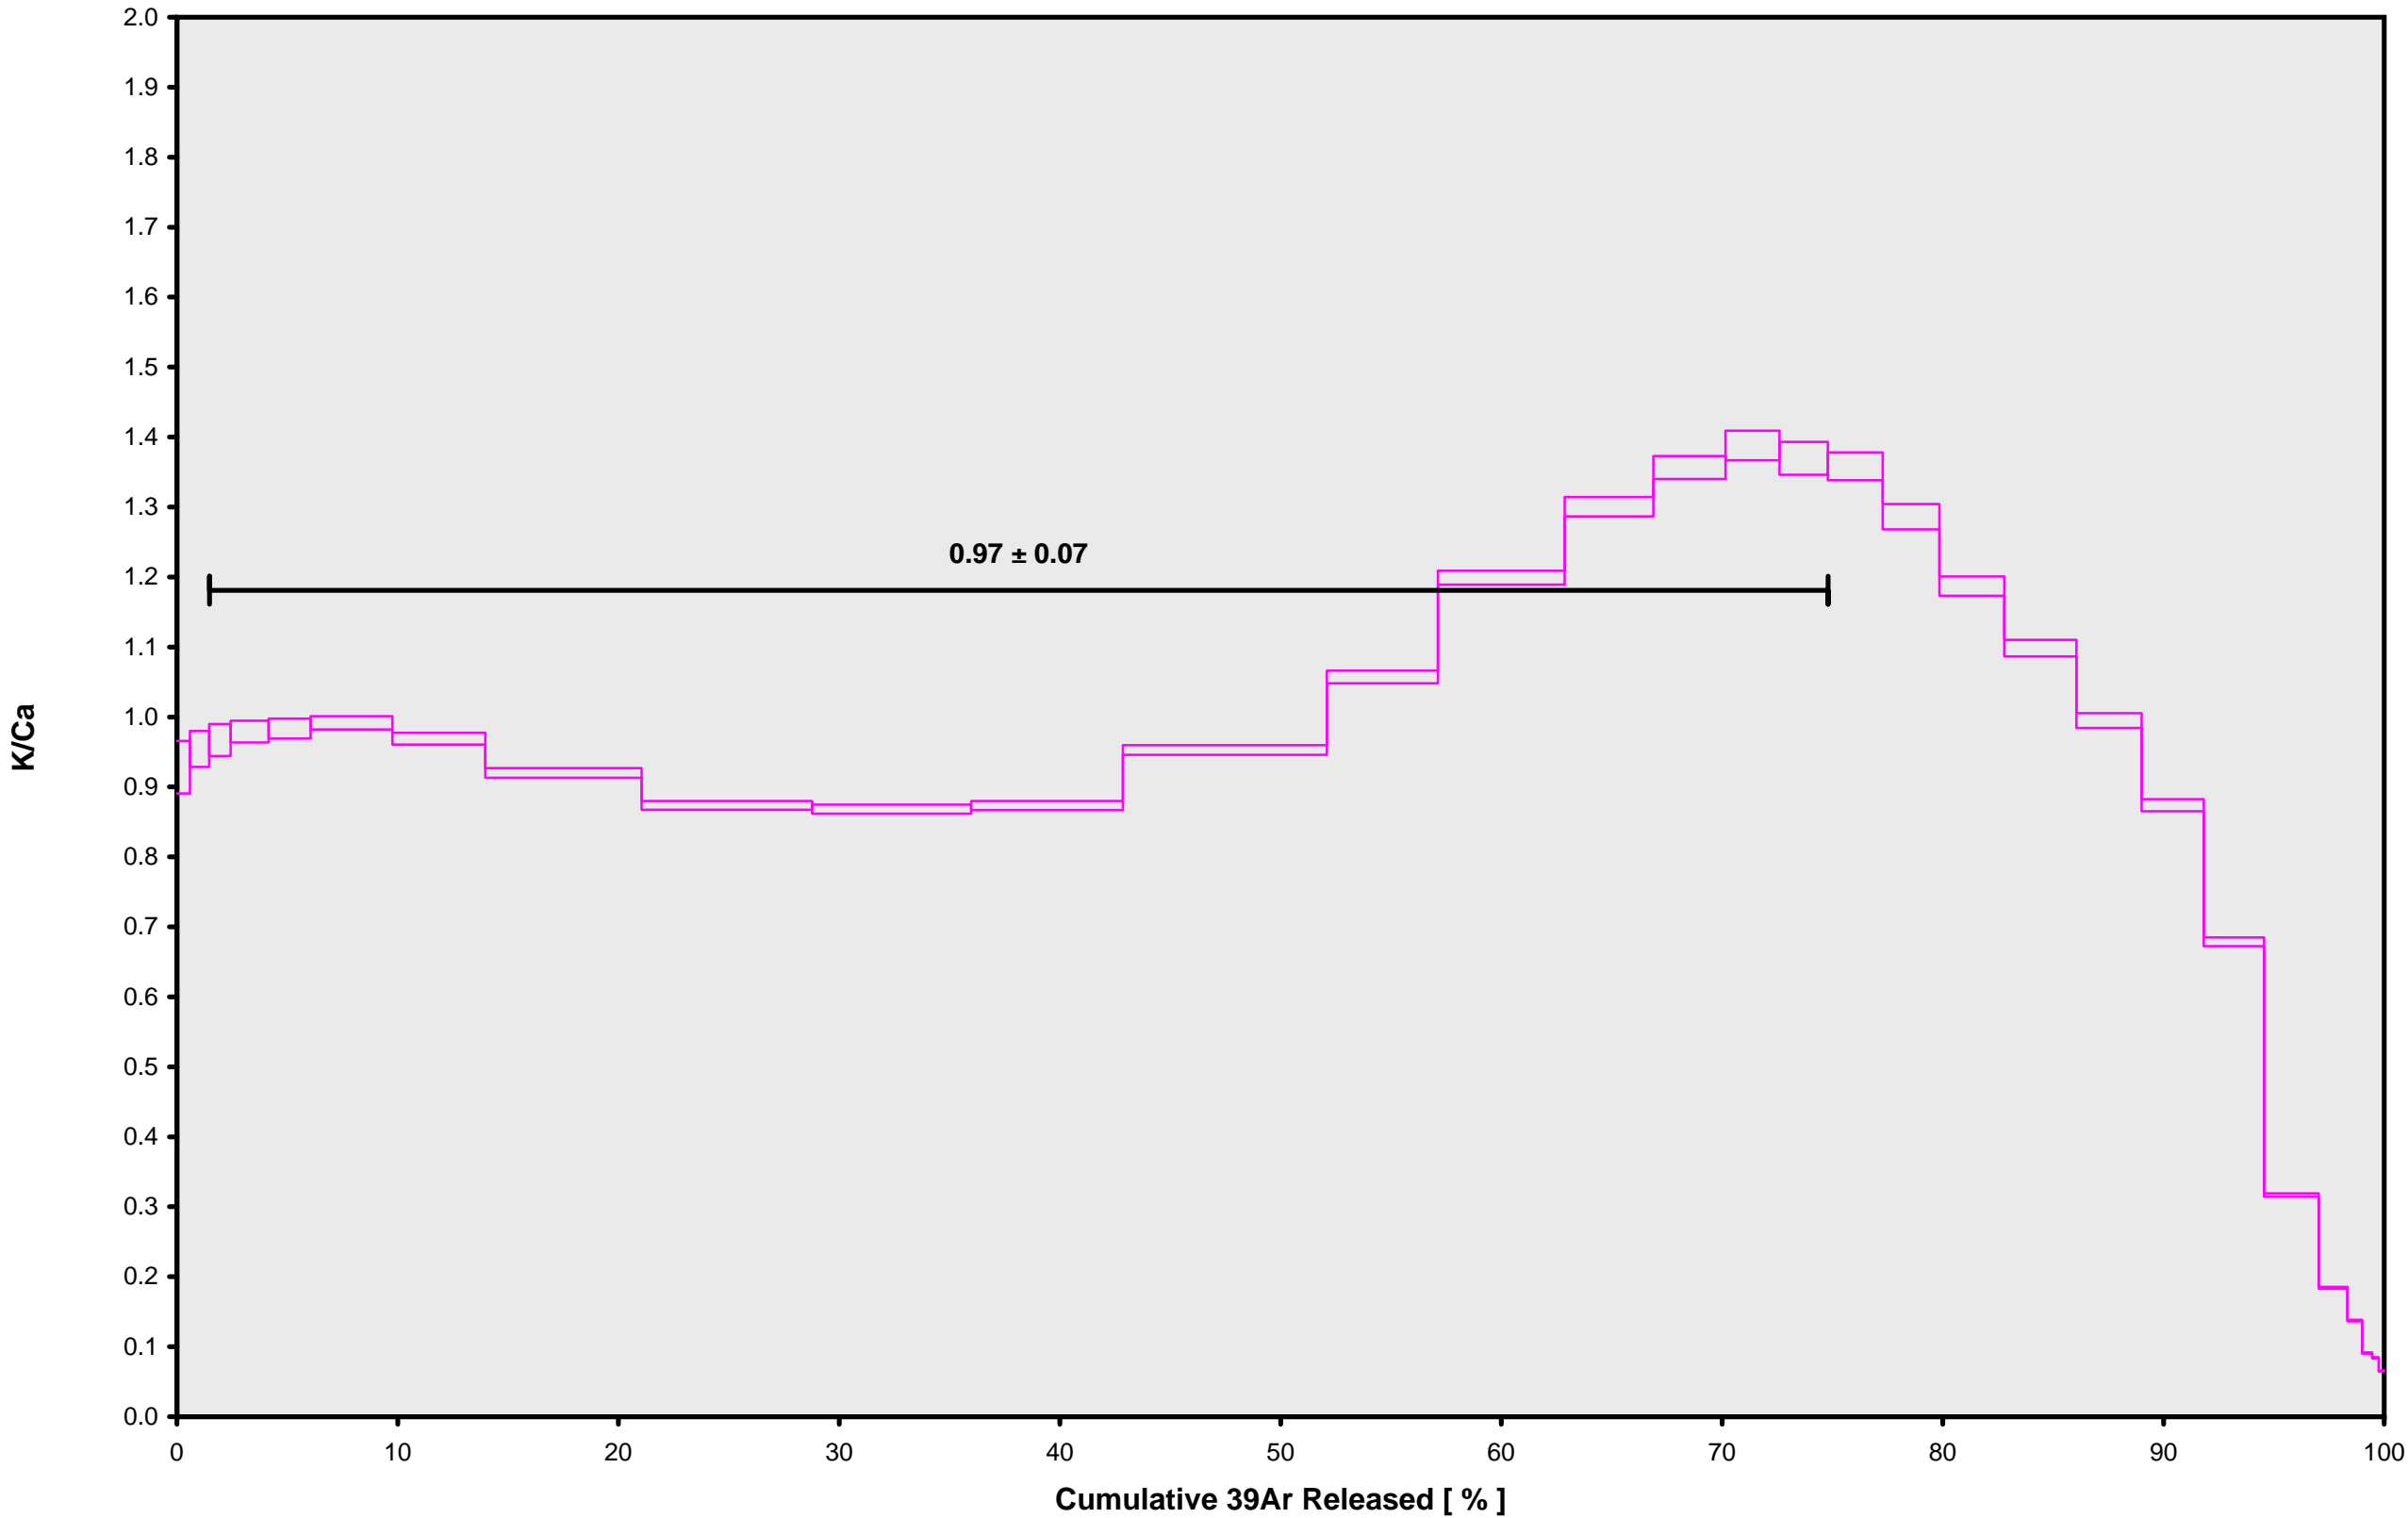

Ar-Ages in ka

WEIGHTED PLATEAU

$290.1 \pm 1.9$

TOTAL FUSION

$286.1 \pm 2.0$

NORMAL ISOCHRON

$285.9 \pm 3.5$

INVERSE ISOCHRON

$286.2 \pm 3.5$

Sample Info

Groundmass

Kerguelen Plateau

Dan Miggins

IRR = 14-OSU-07 (7B26-14)

J =  $0.00175554 \pm 0.00000202$



15D10263.AGE >>> 154-1 >>> KERGUELEN | FALLOON (14-PIL-01) PROJECT

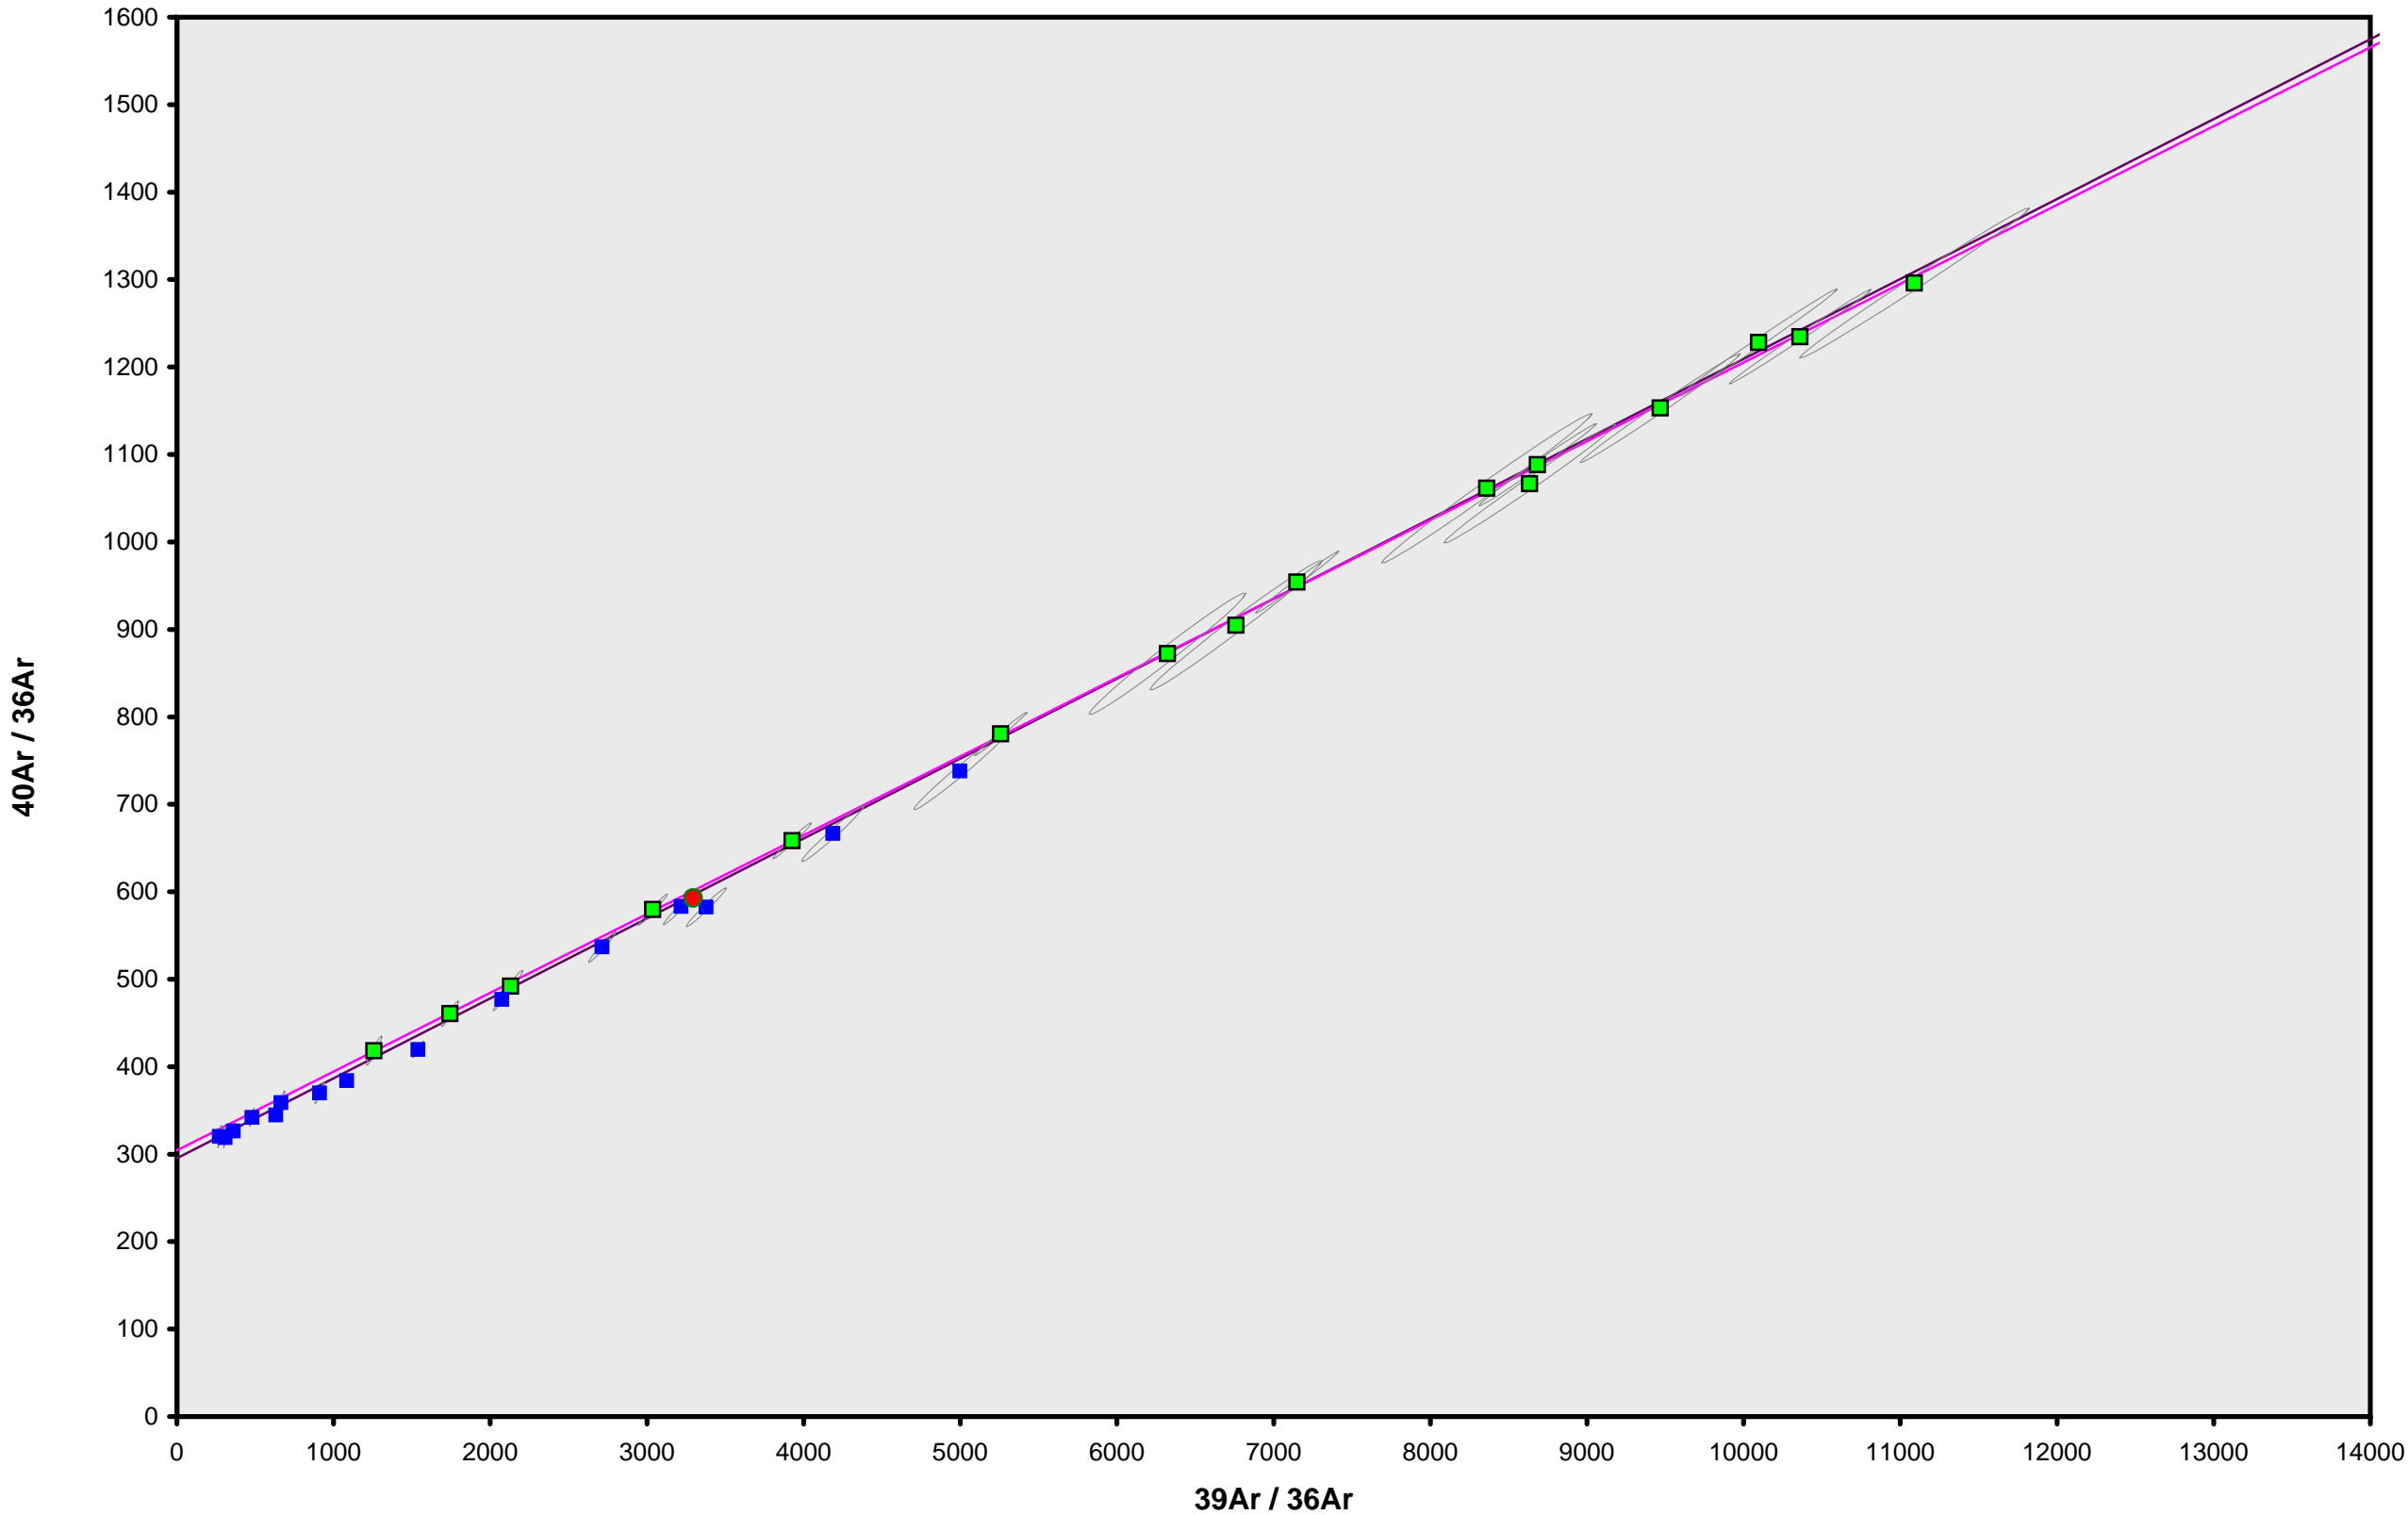

**Ar-Ages in ka**

**WEIGHTED PLATEAU**  
 $290.1 \pm 1.9$

**TOTAL FUSION**  
 $286.1 \pm 2.0$

**NORMAL ISOCHRON**  
 $285.9 \pm 3.5$

**INVERSE ISOCHRON**  
 $286.2 \pm 3.5$

**MSWD (PROBABILITY)**  
 $0.61 (86\%)$

**40AR/36AR INTERCEPT**  
 $304.5 \pm 6.6$

**Sample Info**

**Groundmass**  
Kerguelen Plateau  
Dan Miggins

**IRR = 14-OSU-07 (7B26-14)**  
**J =  $0.00175554 \pm 0.00000202$**



15D10263.AGE >>> 154-1 >>> KERGUELEN | FALLOON (14-PIL-01) PROJECT

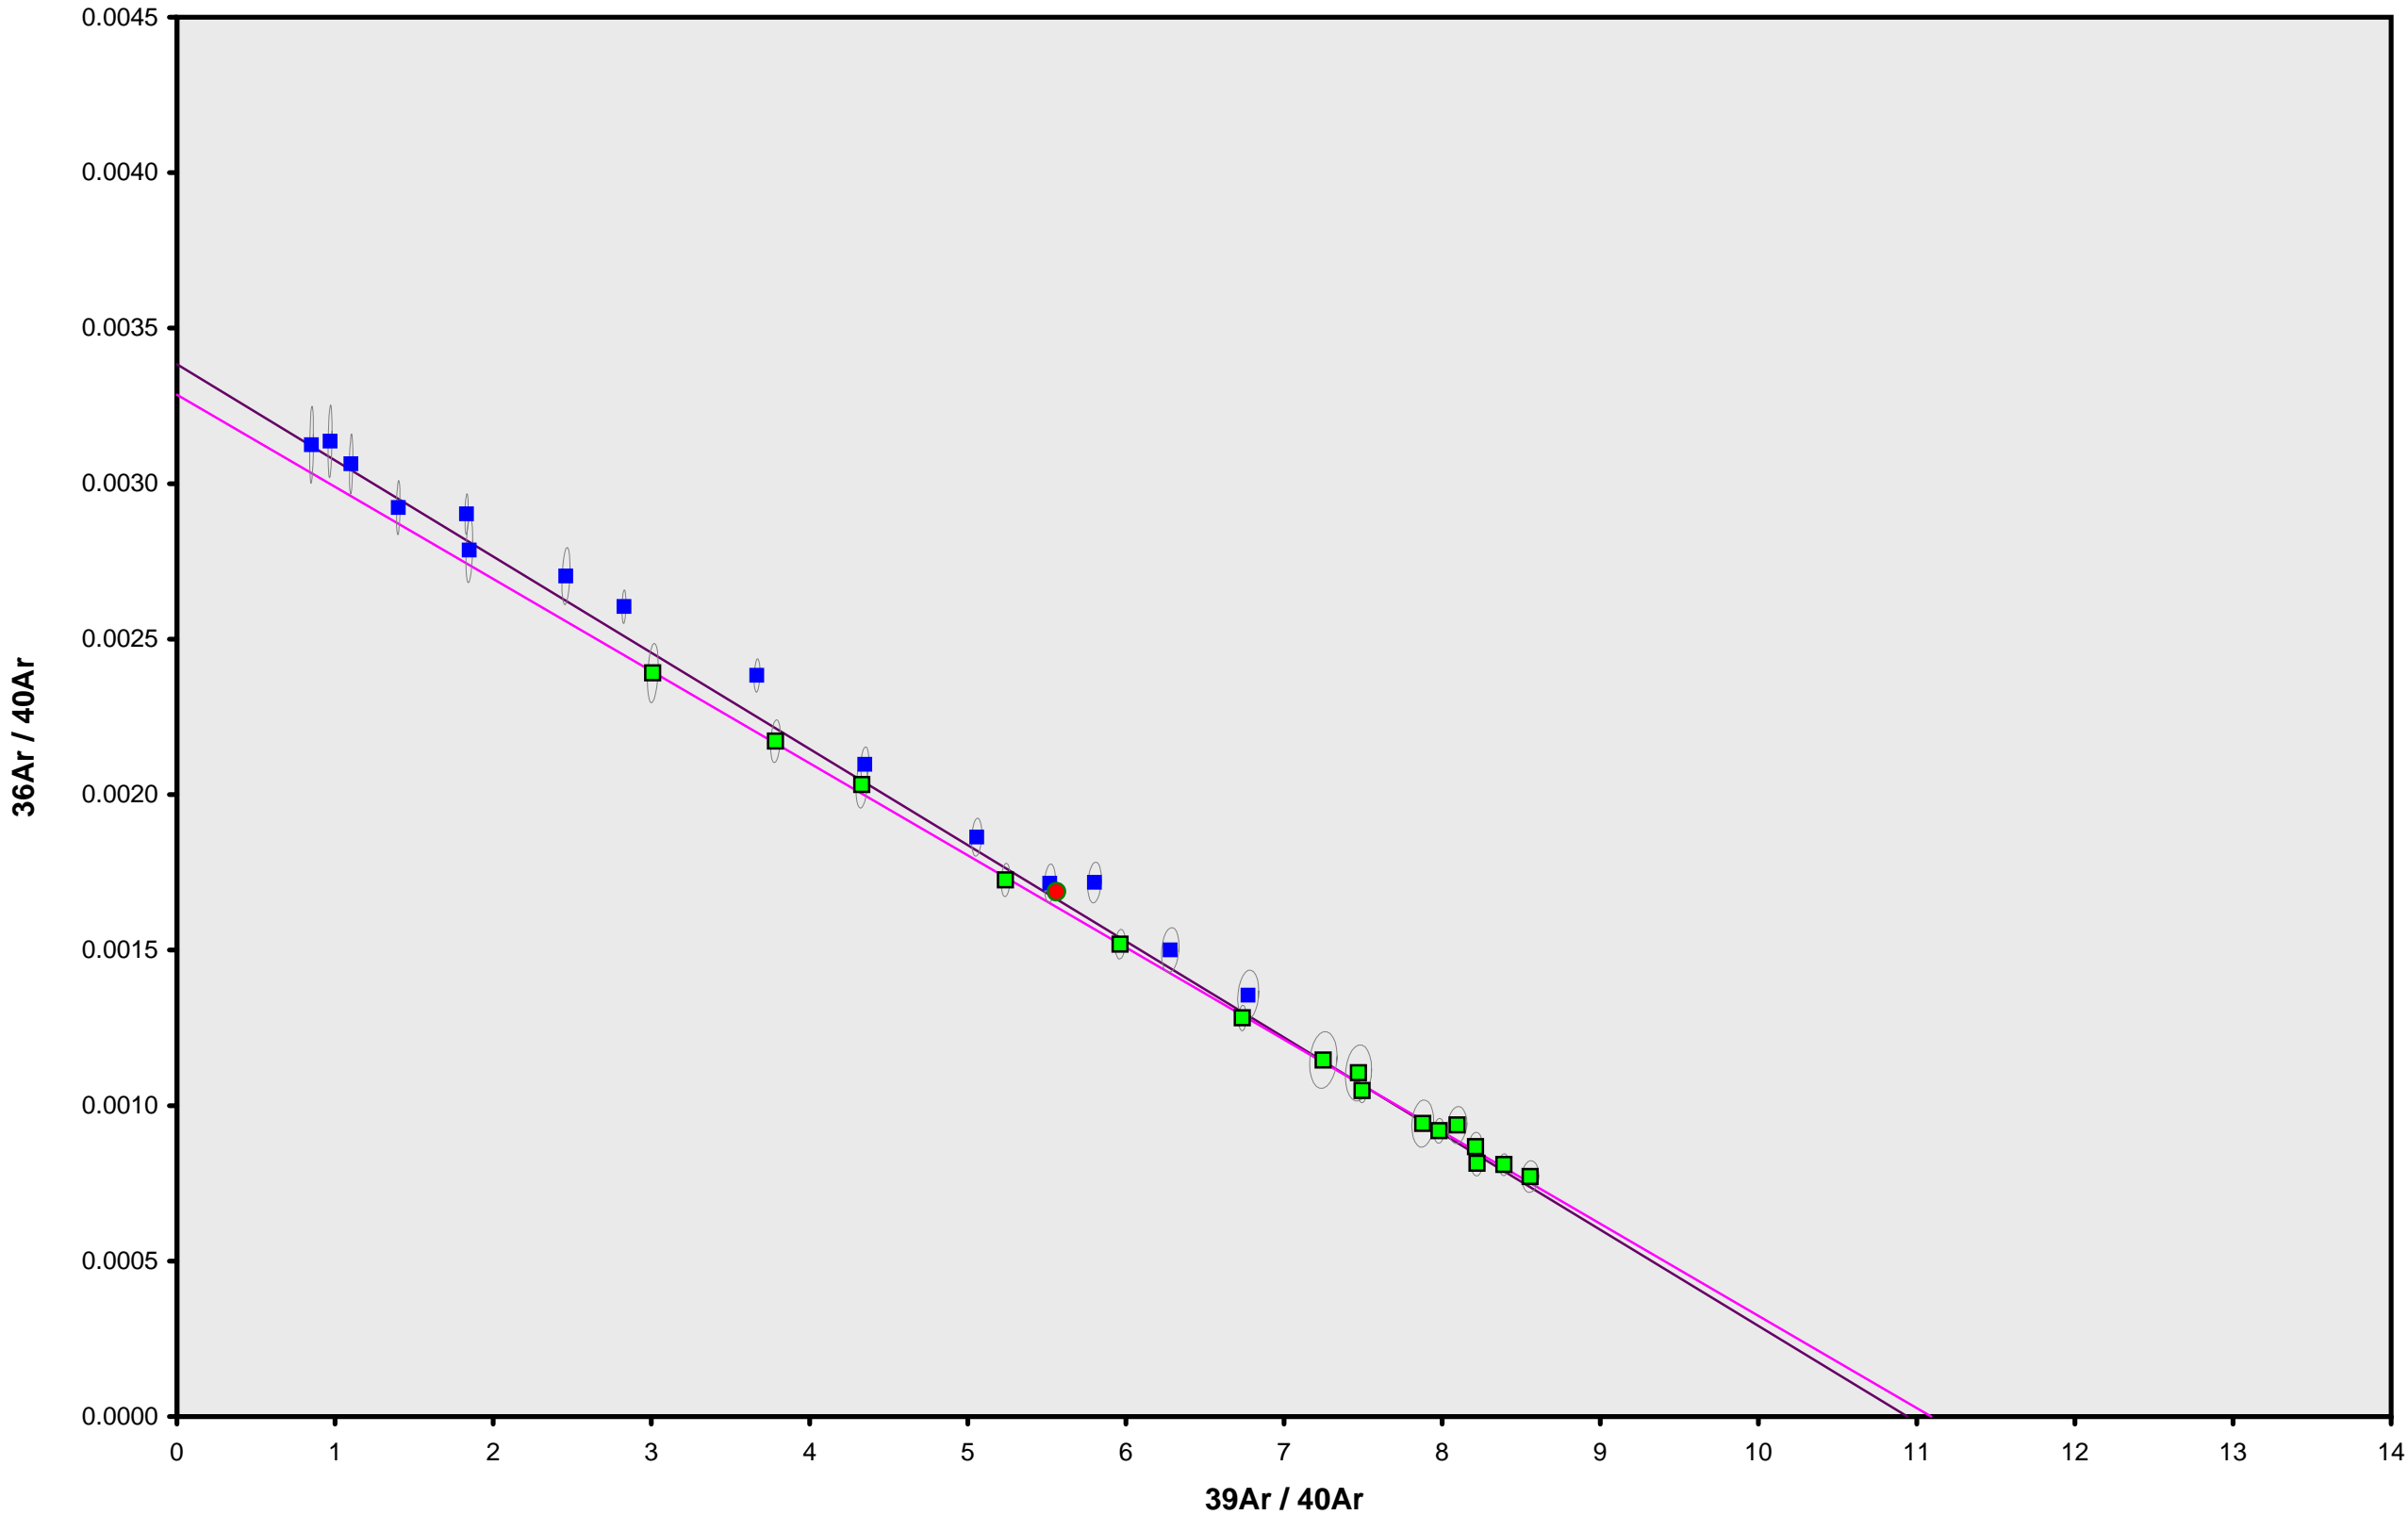

Ar-Ages in ka

WEIGHTED PLATEAU

$290.1 \pm 1.9$

TOTAL FUSION

$286.1 \pm 2.0$

NORMAL ISOCHRON

$285.9 \pm 3.5$

INVERSE ISOCHRON

$286.2 \pm 3.5$

MSWD (PROBABILITY)

0.61 (86%)

SPREADING FACTOR

50.0%

40AR/36AR INTERCEPT

$304.3 \pm 6.6$

Sample Info

Groundmass

Kerguelen Plateau

Dan Miggins

IRR = 14-OSU-07 (7B26-14)

J =  $0.00175554 \pm 0.00000202$



| Incremental Heating |        |   | 36Ar(a)<br>[fA] | 37Ar(ca)<br>[fA] | 38Ar(cl)<br>[fA] | 39Ar(k)<br>[fA] | 40Ar(r)<br>[fA] | Age ± 2σ<br>(ka) | 40Ar(r)<br>(%) | 39Ar(k)<br>(%) | K/Ca ± 2σ   |
|---------------------|--------|---|-----------------|------------------|------------------|-----------------|-----------------|------------------|----------------|----------------|-------------|
| 15D10222            | 2.0 %  | ✓ | 0.1344465       | 8.5078           | 0.0767929        | 14.6774         | 1.15597         | 248.7 ± 151.4    | 2.83           | 0.34           | 0.74 ± 0.04 |
| 15D10224            | 2.2 %  | ✓ | 0.1115778       | 9.7793           | 0.0082281        | 18.4100         | 0.77385         | 132.8 ± 117.3    | 2.29           | 0.43           | 0.81 ± 0.05 |
| 15D10225            | 2.4 %  | ✓ | 0.0992921       | 12.4652          | 0.0419197        | 22.4893         | 0.93481         | 131.3 ± 91.3     | 3.09           | 0.52           | 0.78 ± 0.03 |
| 15D10226            | 2.6 %  | ✓ | 0.0943032       | 14.9644          | 0.0151933        | 27.8585         | 1.19434         | 135.4 ± 66.8     | 4.11           | 0.65           | 0.80 ± 0.03 |
| 15D10228            | 2.8 %  | ✓ | 0.1139580       | 21.5802          | 0.0554401        | 41.6458         | 2.18138         | 165.4 ± 51.5     | 6.08           | 0.97           | 0.83 ± 0.02 |
| 15D10229            | 3.0 %  | ✓ | 0.1035480       | 24.5729          | 0.0545196        | 48.1403         | 2.65555         | 174.2 ± 43.1     | 7.97           | 1.12           | 0.84 ± 0.02 |
| 15D10230            | 3.3 %  | ✓ | 0.0705405       | 18.1918          | 0.0016646        | 37.1108         | 1.59226         | 135.5 ± 53.6     | 7.08           | 0.87           | 0.88 ± 0.03 |
| 15D10231            | 3.6 %  | ✓ | 0.1663247       | 48.5513          | 0.0333668        | 103.1736        | 5.03940         | 154.3 ± 24.7     | 9.28           | 2.41           | 0.91 ± 0.01 |
| 15D10233            | 3.9 %  | ✓ | 0.1024284       | 37.3299          | 0.0093774        | 80.4652         | 3.29485         | 129.3 ± 27.0     | 9.79           | 1.88           | 0.93 ± 0.01 |
| 15D10234            | 4.3 %  | ✓ | 0.0953698       | 38.6133          | 0.0246196        | 87.3027         | 4.24604         | 153.6 ± 23.1     | 13.06          | 2.04           | 0.97 ± 0.01 |
| 15D10235            | 4.6 %  | ✓ | 0.0996271       | 43.3206          | 0.0000000        | 100.9170        | 4.68797         | 146.7 ± 20.7     | 13.70          | 2.36           | 1.00 ± 0.01 |
| 15D10236            | 4.9 %  | ✓ | 0.1041782       | 50.9561          | 0.0488005        | 121.8679        | 6.55027         | 169.8 ± 17.6     | 17.49          | 2.84           | 1.03 ± 0.01 |
| 15D10238            | 5.2 %  | ✓ | 0.1088973       | 56.9506          | 0.0258339        | 139.2040        | 6.43612         | 146.0 ± 15.4     | 16.61          | 3.25           | 1.05 ± 0.01 |
| 15D10239            | 5.5 %  | ✓ | 0.1599598       | 87.7818          | 0.1043205        | 221.8288        | 10.62960        | 151.3 ± 12.1     | 18.29          | 5.18           | 1.09 ± 0.01 |
| 15D10240            | 5.8 %  | ✓ | 0.0808786       | 56.0969          | 0.0353772        | 146.6823        | 6.60034         | 142.1 ± 13.7     | 21.54          | 3.42           | 1.12 ± 0.01 |
| 15D10242            | 6.1 %  | ✓ | 0.0736537       | 55.1229          | 0.0665154        | 145.8684        | 7.17209         | 155.3 ± 13.0     | 24.66          | 3.41           | 1.14 ± 0.01 |
| 15D10243            | 6.5 %  | ✓ | 0.0870004       | 64.2884          | 0.1362419        | 173.3023        | 8.51224         | 155.1 ± 12.4     | 24.75          | 4.05           | 1.16 ± 0.01 |
| 15D10244            | 7.0 %  | ✓ | 0.1137383       | 84.9096          | 0.1190218        | 232.8626        | 11.43001        | 155.0 ± 10.1     | 25.25          | 5.44           | 1.18 ± 0.01 |
| 15D10246            | 7.6 %  | ✓ | 0.1061571       | 86.3796          | 0.1331250        | 241.5366        | 11.60308        | 151.7 ± 9.2      | 26.85          | 5.64           | 1.20 ± 0.01 |
| 15D10247            | 8.4 %  | ✓ | 0.1228840       | 104.3508         | 0.2167209        | 292.7212        | 14.50698        | 156.5 ± 8.1      | 28.38          | 6.83           | 1.21 ± 0.01 |
| 15D10248            | 9.4 %  | ✓ | 0.1511996       | 121.8624         | 0.2347890        | 346.7480        | 16.45470        | 149.9 ± 7.3      | 26.76          | 8.09           | 1.22 ± 0.01 |
| 15D10250            | 10.5 % | ✓ | 0.1619033       | 112.1787         | 0.2615116        | 319.5011        | 15.11106        | 149.4 ± 7.9      | 23.88          | 7.46           | 1.22 ± 0.01 |
| 15D10251            | 11.7 % | ✓ | 0.1851338       | 99.5475          | 0.2906861        | 282.1404        | 13.16057        | 147.3 ± 9.1      | 19.31          | 6.59           | 1.22 ± 0.01 |
| 15D10252            | 13.1 % | ✓ | 0.3641143       | 133.7877         | 0.5249044        | 314.3026        | 15.79096        | 158.7 ± 12.2     | 12.77          | 7.34           | 1.01 ± 0.01 |
| 15D10254            | 14.7 % | ✓ | 0.4306670       | 129.8208         | 0.6268277        | 255.8008        | 13.24768        | 163.6 ± 15.7     | 9.41           | 5.97           | 0.85 ± 0.01 |
| 15D10255            | 16.5 % | ✓ | 0.4393026       | 149.0192         | 0.5541797        | 194.6602        | 10.22613        | 165.9 ± 21.2     | 7.29           | 4.54           | 0.56 ± 0.00 |
| 15D10256            | 18.5 % | ✓ | 0.2612931       | 128.7445         | 0.2334137        | 107.5626        | 4.95671         | 145.5 ± 28.1     | 6.02           | 2.51           | 0.36 ± 0.00 |
| 15D10258            | 19.8 % | ✓ | 0.1702534       | 105.2696         | 0.1585428        | 65.3229         | 3.12502         | 151.1 ± 41.1     | 5.84           | 1.52           | 0.27 ± 0.00 |
| 15D10259            | 21.7 % | ✓ | 0.1444719       | 148.2969         | 0.1430692        | 49.3040         | 2.30777         | 147.8 ± 52.1     | 5.12           | 1.15           | 0.14 ± 0.00 |
| 15D10260            | 22.8 % | ✓ | 0.0921049       | 97.6518          | 0.0707780        | 29.5146         | 1.37995         | 147.7 ± 73.0     | 4.82           | 0.69           | 0.13 ± 0.00 |
| 15D10262            | 24.3 % | ✓ | 0.0691370       | 78.1632          | 0.0344593        | 20.7764         | 1.05933         | 161.0 ± 95.1     | 4.92           | 0.49           | 0.11 ± 0.00 |
| Σ                   |        |   | 4.6183447       | 2229.0560        | 4.3402408        | 4283.6983       | 208.01703       |                  |                |                |             |

| Information on Analysis                                                                                                                                                                                                                                                        | Results          | 40(r)/39(k) ± 2σ             | Age ± 2σ<br>(ka)       | MSWD        | 39Ar(k)<br>(%,n) | K/Ca ± 2σ   |
|--------------------------------------------------------------------------------------------------------------------------------------------------------------------------------------------------------------------------------------------------------------------------------|------------------|------------------------------|------------------------|-------------|------------------|-------------|
| Sample = 1180256-1<br>Material = Groundmass<br>Location = Kerguelen Plateau<br>Analyst = Dan Miggins<br>Project = KERGUELEN   FALLOON (14-I<br>Mass Discrimination Law = LIN<br>Irradiation = 14-OSU-07 (7B27-14)<br>J = 0.00174661 ± 0.00000199<br>FCT-NM = 28.201 ± 0.023 Ma | Age Plateau      | 0.04825 ± 0.00085<br>± 1.75% | 152.4 ± 2.7<br>± 1.77% | 0.77<br>81% | 100.00<br>31     | 0.21 ± 0.09 |
|                                                                                                                                                                                                                                                                                |                  |                              |                        |             |                  |             |
|                                                                                                                                                                                                                                                                                |                  |                              |                        |             |                  |             |
|                                                                                                                                                                                                                                                                                | Total Fusion Age | 0.04856 ± 0.00103<br>± 2.12% | 153.4 ± 3.3<br>± 2.13% | 1.0000      | 31               | 0.83 ± 0.00 |
|                                                                                                                                                                                                                                                                                |                  |                              |                        |             |                  |             |



| Normal Isochron |        |   | 39(k)/36(a) ± 2σ | 40(a+r)/36(a) ± 2σ | r.i.   |
|-----------------|--------|---|------------------|--------------------|--------|
| 15D10222        | 2.0 %  | ✓ | 109.17 ± 1.95    | 304.10 ± 5.37      | 0.9284 |
| 15D10224        | 2.2 %  | ✓ | 165.00 ± 3.36    | 302.44 ± 6.26      | 0.9452 |
| 15D10225        | 2.4 %  | ✓ | 226.50 ± 4.89    | 304.91 ± 6.74      | 0.9504 |
| 15D10226        | 2.6 %  | ✓ | 295.41 ± 6.02    | 308.16 ± 6.50      | 0.9450 |
| 15D10228        | 2.8 %  | ✓ | 365.45 ± 7.15    | 314.64 ± 6.32      | 0.9611 |
| 15D10229        | 3.0 %  | ✓ | 464.91 ± 9.63    | 321.15 ± 6.85      | 0.9613 |
| 15D10230        | 3.3 %  | ✓ | 526.09 ± 15.27   | 318.07 ± 9.55      | 0.9603 |
| 15D10231        | 3.6 %  | ✓ | 620.31 ± 9.98    | 325.80 ± 5.33      | 0.9741 |
| 15D10233        | 3.9 %  | ✓ | 785.57 ± 17.26   | 327.67 ± 7.39      | 0.9685 |
| 15D10234        | 4.3 %  | ✓ | 915.41 ± 20.00   | 340.02 ± 7.64      | 0.9668 |
| 15D10235        | 4.6 %  | ✓ | 1012.95 ± 21.97  | 342.56 ± 7.63      | 0.9681 |
| 15D10236        | 4.9 %  | ✓ | 1169.80 ± 24.99  | 358.38 ± 7.83      | 0.9729 |
| 15D10238        | 5.2 %  | ✓ | 1278.31 ± 25.97  | 354.60 ± 7.37      | 0.9720 |
| 15D10239        | 5.5 %  | ✓ | 1386.78 ± 24.36  | 361.95 ± 6.44      | 0.9815 |
| 15D10240        | 5.8 %  | ✓ | 1813.61 ± 46.36  | 377.11 ± 9.89      | 0.9719 |
| 15D10242        | 6.1 %  | ✓ | 1980.46 ± 52.18  | 392.88 ± 10.62     | 0.9718 |
| 15D10243        | 6.5 %  | ✓ | 1991.97 ± 50.84  | 393.34 ± 10.24     | 0.9778 |
| 15D10244        | 7.0 %  | ✓ | 2047.35 ± 43.91  | 395.99 ± 8.63      | 0.9806 |
| 15D10246        | 7.6 %  | ✓ | 2275.28 ± 49.51  | 404.80 ± 8.96      | 0.9795 |
| 15D10247        | 8.4 %  | ✓ | 2382.09 ± 47.71  | 413.55 ± 8.40      | 0.9822 |
| 15D10248        | 9.4 %  | ✓ | 2293.31 ± 40.34  | 404.33 ± 7.20      | 0.9826 |
| 15D10250        | 10.5 % | ✓ | 1973.41 ± 31.99  | 388.83 ± 6.38      | 0.9811 |
| 15D10251        | 11.7 % | ✓ | 1523.98 ± 22.21  | 366.59 ± 5.41      | 0.9793 |
| 15D10252        | 13.1 % | ✓ | 863.20 ± 9.66    | 338.87 ± 3.80      | 0.9840 |
| 15D10254        | 14.7 % | ✓ | 593.96 ± 5.93    | 326.26 ± 3.26      | 0.9820 |
| 15D10255        | 16.5 % | ✓ | 443.11 ± 4.45    | 318.78 ± 3.20      | 0.9820 |
| 15D10256        | 18.5 % | ✓ | 411.65 ± 5.05    | 314.47 ± 3.89      | 0.9757 |
| 15D10258        | 19.8 % | ✓ | 383.68 ± 6.37    | 313.86 ± 5.29      | 0.9734 |
| 15D10259        | 21.7 % | ✓ | 341.27 ± 6.38    | 311.47 ± 5.92      | 0.9713 |
| 15D10260        | 22.8 % | ✓ | 320.45 ± 7.80    | 310.48 ± 7.75      | 0.9608 |
| 15D10262        | 24.3 % | ✓ | 300.51 ± 8.89    | 310.82 ± 9.48      | 0.9538 |

| Results         | 40(a)/36(a) ± 2σ                                                    | 40(r)/39(k) ± 2σ          | Age ± 2σ (ka)                                                              | MSWD                                   |
|-----------------|---------------------------------------------------------------------|---------------------------|----------------------------------------------------------------------------|----------------------------------------|
| Normal Isochron | 296.42 ± 1.60 ± 0.54%                                               | 0.04756 ± 0.00143 ± 3.01% | 150.2 ± 4.5 ± 3.01%<br>Full External Error ± 5.7<br>Analytical Error ± 4.5 | 0.75<br>83%                            |
| Statistics      | 2σ Confidence Limit<br>Error Magnification<br>Number of Data Points | 1.53<br>1.0000<br>31      | Convergence<br>Number of Iterations<br>Calculated Line                     | 0.000000292507<br>6<br>Weighted York-2 |



| Inverse Isochron |        | 39(k)/40(a+r) ± 2σ |                       | 36(a)/40(a+r) ± 2σ      | r.i.   |
|------------------|--------|--------------------|-----------------------|-------------------------|--------|
| 15D10222         | 2.0 %  | ✓                  | 0.3589936 ± 0.0024119 | 0.00328841 ± 0.00005812 | 0.1684 |
| 15D10224         | 2.2 %  | ✓                  | 0.5455602 ± 0.0037161 | 0.00330649 ± 0.00006847 | 0.2114 |
| 15D10225         | 2.4 %  | ✓                  | 0.7428190 ± 0.0051225 | 0.00327961 ± 0.00007249 | 0.2325 |
| 15D10226         | 2.6 %  | ✓                  | 0.9586238 ± 0.0066247 | 0.00324502 ± 0.00006840 | 0.2619 |
| 15D10228         | 2.8 %  | ✓                  | 1.1614747 ± 0.0064520 | 0.00317822 ± 0.00006385 | 0.2304 |
| 15D10229         | 3.0 %  | ✓                  | 1.4476539 ± 0.0085173 | 0.00311385 ± 0.00006642 | 0.2407 |
| 15D10230         | 3.3 %  | ✓                  | 1.6540005 ± 0.0138542 | 0.00314394 ± 0.00009439 | 0.2566 |
| 15D10231         | 3.6 %  | ✓                  | 1.9039814 ± 0.0070502 | 0.00306938 ± 0.00005025 | 0.1880 |
| 15D10233         | 3.9 %  | ✓                  | 2.3974762 ± 0.0134790 | 0.00305188 ± 0.00006887 | 0.2285 |
| 15D10234         | 4.3 %  | ✓                  | 2.6922177 ± 0.0154729 | 0.00294099 ± 0.00006610 | 0.2351 |
| 15D10235         | 4.6 %  | ✓                  | 2.9570326 ± 0.0165225 | 0.00291924 ± 0.00006506 | 0.2312 |
| 15D10236         | 4.9 %  | ✓                  | 3.2641788 ± 0.0165122 | 0.00279037 ± 0.00006099 | 0.2120 |
| 15D10238         | 5.2 %  | ✓                  | 3.6048945 ± 0.0176161 | 0.00282006 ± 0.00005865 | 0.2147 |
| 15D10239         | 5.5 %  | ✓                  | 3.8313902 ± 0.0130398 | 0.00276280 ± 0.00004915 | 0.1610 |
| 15D10240         | 5.8 %  | ✓                  | 4.8092633 ± 0.0296705 | 0.00265176 ± 0.00006953 | 0.2226 |
| 15D10242         | 6.1 %  | ✓                  | 5.0409361 ± 0.0321535 | 0.00254533 ± 0.00006881 | 0.2242 |
| 15D10243         | 6.5 %  | ✓                  | 5.0642301 ± 0.0275934 | 0.00254232 ± 0.00006616 | 0.1956 |
| 15D10244         | 7.0 %  | ✓                  | 5.1701663 ± 0.0220906 | 0.00252529 ± 0.00005501 | 0.1764 |
| 15D10246         | 7.6 %  | ✓                  | 5.6207258 ± 0.0250610 | 0.00247035 ± 0.00005467 | 0.1828 |
| 15D10247         | 8.4 %  | ✓                  | 5.7600521 ± 0.0219825 | 0.00241806 ± 0.00004909 | 0.1649 |
| 15D10248         | 9.4 %  | ✓                  | 5.6719168 ± 0.0187591 | 0.00247324 ± 0.00004402 | 0.1558 |
| 15D10250         | 10.5 % | ✓                  | 5.0751925 ± 0.0161061 | 0.00257179 ± 0.00004221 | 0.1592 |
| 15D10251         | 11.7 % | ✓                  | 4.1572171 ± 0.0124318 | 0.00272787 ± 0.00004025 | 0.1618 |
| 15D10252         | 13.1 % | ✓                  | 2.5472960 ± 0.0051050 | 0.00295100 ± 0.00003308 | 0.0999 |
| 15D10254         | 14.7 % | ✓                  | 1.8205198 ± 0.0034470 | 0.00306503 ± 0.00003060 | 0.0942 |
| 15D10255         | 16.5 % | ✓                  | 1.3900324 ± 0.0026474 | 0.00313698 ± 0.00003146 | 0.0910 |
| 15D10256         | 18.5 % | ✓                  | 1.3090438 ± 0.0035582 | 0.00317995 ± 0.00003934 | 0.1509 |
| 15D10258         | 19.8 % | ✓                  | 1.2224755 ± 0.0047269 | 0.00318618 ± 0.00005368 | 0.1802 |
| 15D10259         | 21.7 % | ✓                  | 1.0956634 ± 0.0049591 | 0.00321054 ± 0.00006107 | 0.1895 |
| 15D10260         | 22.8 % | ✓                  | 1.0320895 ± 0.0071534 | 0.00322080 ± 0.00008044 | 0.2288 |
| 15D10262         | 24.3 % | ✓                  | 0.9668244 ± 0.0088781 | 0.00321727 ± 0.00009815 | 0.2500 |

| Results          | 40(a)/36(a) ± 2σ                                    |                   | 40(r)/39(k) ± 2σ     | Age ± 2σ (ka)        | MSWD                   |             |
|------------------|-----------------------------------------------------|-------------------|----------------------|----------------------|------------------------|-------------|
| Inverse Isochron | 296.45                                              | ± 1.60<br>± 0.54% | 0.04758              | ± 0.00142<br>± 2.99% | 150.3 ± 4.5<br>± 3.00% | 0.75<br>83% |
|                  | Full External Error ± 5.6<br>Analytical Error ± 4.5 |                   |                      |                      |                        |             |
|                  |                                                     |                   |                      |                      |                        |             |
| Statistics       | 2σ Confidence Limit                                 | 1.53              | Convergence          | 0.0071894521         |                        |             |
|                  | Error Magnification                                 | 1.0000            | Number of Iterations | 3                    |                        |             |
|                  | Number of Data Points                               | 31                | Calculated Line      | Weighted York-2      |                        |             |
|                  | Spreading Factor                                    | 25.7%             |                      |                      |                        |             |







| OSU Argon Geochronology Lab |        |   |           |      |           |      |           |      |           |        |          |      |           |      |           |      |          |      |           |      |           |        |          |      |           |      |          |       |         |      |           |      |           |      |
|-----------------------------|--------|---|-----------|------|-----------|------|-----------|------|-----------|--------|----------|------|-----------|------|-----------|------|----------|------|-----------|------|-----------|--------|----------|------|-----------|------|----------|-------|---------|------|-----------|------|-----------|------|
| Degassing<br>Patterns       |        |   | 36Ar(a)   | %1σ  | 36Ar(c)   | %1σ  | 36Ar(ca)  | %1σ  | 36Ar(cl)  | %1σ    | 37Ar(ca) | %1σ  | 38Ar(a)   | %1σ  | 38Ar(c)   | %1σ  | 38Ar(k)  | %1σ  | 38Ar(ca)  | %1σ  | 38Ar(cl)  | %1σ    | 39Ar(k)  | %1σ  | 39Ar(ca)  | %1σ  | 40Ar(r)  | %1σ   | 40Ar(a) | %1σ  | 40Ar(c)   | %1σ  | 40Ar(k)   | %1σ  |
|                             |        |   | [fA]      |      | [fA]      |      | [fA]      |      | [fA]      |        | [fA]     |      | [fA]      |      | [fA]      |      | [fA]     |      | [fA]      |      | [fA]      |        | [fA]     |      | [fA]      |      | [fA]     |       | [fA]    |      | [fA]      |      | [fA]      |      |
| 15D10222                    | 2.0 %  | ✓ | 0.1344465 | 0.85 | 0.0000000 | 0.00 | 0.0022460 | 3.01 | 0.0000114 | 49.22  | 8.5078   | 3.01 | 0.0251281 | 0.85 | 0.0000000 | 0.00 | 0.167029 | 0.25 | 0.0001183 | 3.01 | 0.0767929 | 49.23  | 14.6774  | 0.25 | 0.0057257 | 3.01 | 1.15597  | 30.43 | 39.7289 | 0.85 | 0.0000000 | 0.00 | 0.0148242 | 0.25 |
| 15D10224                    | 2.2 %  | ✓ | 0.1115778 | 1.00 | 0.0000000 | 0.00 | 0.0025817 | 2.81 | 0.0000012 | 474.88 | 9.7793   | 2.81 | 0.0208539 | 1.00 | 0.0000000 | 0.00 | 0.209506 | 0.20 | 0.0001359 | 2.81 | 0.0082281 | 474.89 | 18.4100  | 0.20 | 0.0065815 | 2.81 | 0.77385  | 44.19 | 32.9712 | 1.00 | 0.0000000 | 0.00 | 0.0185941 | 0.20 |
| 15D10225                    | 2.4 %  | ✓ | 0.0992921 | 1.06 | 0.0000000 | 0.00 | 0.0032908 | 2.09 | 0.0000062 | 91.16  | 12.4652  | 2.09 | 0.0185577 | 1.06 | 0.0000000 | 0.00 | 0.255928 | 0.17 | 0.0001733 | 2.09 | 0.0419197 | 91.17  | 22.4893  | 0.17 | 0.0083890 | 2.09 | 0.93481  | 34.77 | 29.3408 | 1.06 | 0.0000000 | 0.00 | 0.0227142 | 0.17 |
| 15D10226                    | 2.6 %  | ✓ | 0.0943032 | 1.01 | 0.0000000 | 0.00 | 0.0039506 | 1.78 | 0.0000023 | 256.92 | 14.9644  | 1.78 | 0.0176253 | 1.01 | 0.0000000 | 0.00 | 0.317030 | 0.16 | 0.0002080 | 1.78 | 0.0151933 | 256.92 | 27.8585  | 0.16 | 0.0100710 | 1.78 | 1.19434  | 24.68 | 27.8666 | 1.01 | 0.0000000 | 0.00 | 0.0281371 | 0.16 |
| 15D10228                    | 2.8 %  | ✓ | 0.1139580 | 0.97 | 0.0000000 | 0.00 | 0.0056972 | 1.28 | 0.0000083 | 68.49  | 21.5802  | 1.28 | 0.0212988 | 0.97 | 0.0000000 | 0.00 | 0.473929 | 0.11 | 0.0003000 | 1.28 | 0.0554401 | 68.50  | 41.6458  | 0.11 | 0.0145235 | 1.28 | 2.18138  | 15.57 | 33.6746 | 0.97 | 0.0000000 | 0.00 | 0.0420623 | 0.11 |
| 15D10229                    | 3.0 %  | ✓ | 0.1035480 | 1.03 | 0.0000000 | 0.00 | 0.0064873 | 1.16 | 0.0000081 | 70.93  | 24.5729  | 1.16 | 0.0193531 | 1.03 | 0.0000000 | 0.00 | 0.547836 | 0.10 | 0.0003416 | 1.16 | 0.0545196 | 70.94  | 48.1403  | 0.10 | 0.0165376 | 1.16 | 2.65555  | 12.36 | 30.5984 | 1.03 | 0.0000000 | 0.00 | 0.0486217 | 0.10 |
| 15D10230                    | 3.3 %  | ✓ | 0.0705405 | 1.45 | 0.0000000 | 0.00 | 0.0048026 | 1.54 | 0.0000002 | #####  | 18.1918  | 1.54 | 0.0131840 | 1.45 | 0.0000000 | 0.00 | 0.422321 | 0.12 | 0.0002529 | 1.54 | 0.0016646 | #####  | 37.1108  | 0.12 | 0.0122431 | 1.54 | 1.59226  | 19.76 | 20.8447 | 1.45 | 0.0000000 | 0.00 | 0.0374819 | 0.12 |
| 15D10231                    | 3.6 %  | ✓ | 0.1663247 | 0.80 | 0.0000000 | 0.00 | 0.0128175 | 0.65 | 0.0000050 | 117.10 | 48.5513  | 0.65 | 0.0310861 | 0.80 | 0.0000000 | 0.00 | 1.174116 | 0.08 | 0.0006749 | 0.65 | 0.0333668 | 117.10 | 103.1736 | 0.08 | 0.0326750 | 0.65 | 5.03940  | 8.02  | 49.1490 | 0.80 | 0.0000000 | 0.00 | 0.1042054 | 0.08 |
| 15D10233                    | 3.9 %  | ✓ | 0.1024284 | 1.10 | 0.0000000 | 0.00 | 0.0098551 | 0.79 | 0.0000014 | 416.11 | 37.3299  | 0.79 | 0.0191439 | 1.10 | 0.0000000 | 0.00 | 0.915694 | 0.08 | 0.0005189 | 0.79 | 0.0093774 | 416.11 | 80.4652  | 0.08 | 0.0251230 | 0.79 | 3.29485  | 10.43 | 30.2676 | 1.10 | 0.0000000 | 0.00 | 0.0812698 | 0.08 |
| 15D10234                    | 4.3 %  | ✓ | 0.0953698 | 1.09 | 0.0000000 | 0.00 | 0.0101939 | 0.74 | 0.0000037 | 160.20 | 38.6133  | 0.74 | 0.0178246 | 1.09 | 0.0000000 | 0.00 | 0.993505 | 0.08 | 0.0005367 | 0.74 | 0.0246196 | 160.20 | 87.3027  | 0.08 | 0.0259868 | 0.74 | 4.24604  | 7.53  | 28.1818 | 1.09 | 0.0000000 | 0.00 | 0.0881758 | 0.08 |
| 15D10235                    | 4.6 %  | ✓ | 0.0996271 | 1.08 | 0.0000000 | 0.00 | 0.0114366 | 0.69 | 0.0000000 | 0.00   | 43.3206  | 0.69 | 0.0186203 | 1.08 | 0.0000000 | 0.00 | 1.148435 | 0.08 | 0.0006022 | 0.69 | 0.0000000 | 0.00   | 100.9170 | 0.08 | 0.0291548 | 0.69 | 4.68797  | 7.07  | 29.4398 | 1.08 | 0.0000000 | 0.00 | 0.1019261 | 0.08 |
| 15D10236                    | 4.9 %  | ✓ | 0.1041782 | 1.07 | 0.0000000 | 0.00 | 0.0134524 | 0.61 | 0.0000073 | 78.36  | 50.9561  | 0.61 | 0.0194709 | 1.07 | 0.0000000 | 0.00 | 1.386857 | 0.07 | 0.0007083 | 0.61 | 0.0488005 | 78.37  | 121.8679 | 0.07 | 0.0342935 | 0.61 | 6.55027  | 5.20  | 30.7847 | 1.07 | 0.0000000 | 0.00 | 0.1230866 | 0.07 |
| 15D10238                    | 5.2 %  | ✓ | 0.1088973 | 1.01 | 0.0000000 | 0.00 | 0.0150350 | 0.57 | 0.0000039 | 144.44 | 56.9506  | 0.57 | 0.0203529 | 1.01 | 0.0000000 | 0.00 | 1.584142 | 0.07 | 0.0007916 | 0.57 | 0.0258339 | 144.45 | 139.2040 | 0.07 | 0.0383277 | 0.57 | 6.43612  | 5.26  | 32.1792 | 1.01 | 0.0000000 | 0.00 | 0.1405961 | 0.07 |
| 15D10239                    | 5.5 %  | ✓ | 0.1599598 | 0.88 | 0.0000000 | 0.00 | 0.0231744 | 0.44 | 0.0000156 | 36.16  | 87.7818  | 0.44 | 0.0298965 | 0.88 | 0.0000000 | 0.00 | 2.524412 | 0.07 | 0.0012202 | 0.44 | 0.1043205 | 36.17  | 221.8288 | 0.07 | 0.0590772 | 0.44 | 10.62960 | 3.99  | 47.2681 | 0.88 | 0.0000000 | 0.00 | 0.2240471 | 0.07 |
| 15D10240                    | 5.8 %  | ✓ | 0.0808786 | 1.28 | 0.0000000 | 0.00 | 0.0148096 | 0.57 | 0.0000053 | 110.64 | 56.0969  | 0.57 | 0.0151162 | 1.28 | 0.0000000 | 0.00 | 1.669245 | 0.07 | 0.0007797 | 0.57 | 0.0353772 | 110.64 | 146.6823 | 0.07 | 0.0377532 | 0.57 | 6.60034  | 4.82  | 23.8996 | 1.28 | 0.0000000 | 0.00 | 0.1481491 | 0.07 |
| 15D10242                    | 6.1 %  | ✓ | 0.0736537 | 1.32 | 0.0000000 | 0.00 | 0.0145524 | 0.58 | 0.0000099 | 60.93  | 55.1229  | 0.58 | 0.0137659 | 1.32 | 0.0000000 | 0.00 | 1.659982 | 0.07 | 0.0007662 | 0.58 | 0.0665154 | 60.93  | 145.8684 | 0.07 | 0.0370977 | 0.58 | 7.17209  | 4.18  | 21.7647 | 1.32 | 0.0000000 | 0.00 | 0.1473271 | 0.07 |
| 15D10243                    | 6.5 %  | ✓ | 0.0870004 | 1.27 | 0.0000000 | 0.00 | 0.0169721 | 0.52 | 0.0000203 | 28.09  | 64.2884  | 0.52 | 0.0162604 | 1.27 | 0.0000000 | 0.00 | 1.972180 | 0.07 | 0.0008936 | 0.52 | 0.1362419 | 28.10  | 173.3023 | 0.07 | 0.0432661 | 0.52 | 8.51224  | 3.99  | 25.7086 | 1.27 | 0.0000000 | 0.00 | 0.1750353 | 0.07 |
| 15D10244                    | 7.0 %  | ✓ | 0.1137383 | 1.07 | 0.0000000 | 0.00 | 0.0224161 | 0.45 | 0.0000178 | 32.83  | 84.9096  | 0.45 | 0.0212577 | 1.07 | 0.0000000 | 0.00 | 2.649976 | 0.07 | 0.0011802 | 0.45 | 0.1190218 | 32.84  | 232.8626 | 0.07 | 0.0571442 | 0.45 | 11.43001 | 3.25  | 33.6097 | 1.07 | 0.0000000 | 0.00 | 0.2351912 | 0.07 |
| 15D10246                    | 7.6 %  | ✓ | 0.1061571 | 1.09 | 0.0000000 | 0.00 | 0.0228042 | 0.44 | 0.0000199 | 29.33  | 86.3796  | 0.44 | 0.0198408 | 1.09 | 0.0000000 | 0.00 | 2.748687 | 0.07 | 0.0012007 | 0.44 | 0.1331250 | 29.35  | 241.5366 | 0.07 | 0.0581335 | 0.44 | 11.60308 | 3.04  | 31.3694 | 1.09 | 0.0000000 | 0.00 | 0.2439520 | 0.07 |
| 15D10247                    | 8.4 %  | ✓ | 0.1228840 | 1.00 | 0.0000000 | 0.00 | 0.0275486 | 0.41 | 0.0000324 | 18.10  | 104.3508 | 0.41 | 0.0229670 | 1.00 | 0.0000000 | 0.00 | 3.331167 | 0.07 | 0.0014505 | 0.41 | 0.2167209 | 18.13  | 292.7212 | 0.07 | 0.0702281 | 0.41 | 14.50698 | 2.58  | 36.3122 | 1.00 | 0.0000000 | 0.00 | 0.2956484 | 0.07 |
| 15D10248                    | 9.4 %  | ✓ | 0.1511996 | 0.88 | 0.0000000 | 0.00 | 0.0321717 | 0.39 | 0.0000351 | 16.55  | 121.8624 | 0.39 | 0.0282592 | 0.88 | 0.0000000 | 0.00 | 3.945993 | 0.07 | 0.0016939 | 0.39 | 0.2347890 | 16.57  | 346.7480 | 0.07 | 0.0820134 | 0.39 | 16.45470 | 2.45  | 44.6795 | 0.88 | 0.0000000 | 0.00 | 0.3502155 | 0.07 |
| 15D10250                    | 10.5 % | ✓ | 0.1619033 | 0.81 | 0.0000000 | 0.00 | 0.0296152 | 0.41 | 0.0000391 | 15.12  | 112.1787 | 0.41 | 0.0302597 | 0.81 | 0.0000000 | 0.00 | 3.635923 | 0.07 | 0.0015593 | 0.41 | 0.2615116 | 15.14  | 319.5011 | 0.07 | 0.0754963 | 0.41 | 15.11106 | 2.63  | 47.8424 | 0.81 | 0.0000000 | 0.00 | 0.3226961 | 0.07 |
| 15D10251                    | 11.7 % | ✓ | 0.1851338 | 0.73 | 0.0000000 | 0.00 | 0.0262806 | 0.43 | 0.0000434 | 13.55  | 99.5475  | 0.43 | 0.0346015 | 0.73 | 0.0000000 | 0.00 | 3.210758 | 0.07 | 0.0013837 | 0.43 | 0.2906861 | 13.58  | 282.1404 | 0.07 | 0.0669955 | 0.43 | 13.16057 | 3.09  | 54.7070 | 0.73 | 0.0000000 | 0.00 | 0.2849618 | 0.07 |
| 15D10252                    | 13.1 % | ✓ | 0         |      |           |      |           |      |           |        |          |      |           |      |           |      |          |      |           |      |           |        |          |      |           |      |          |       |         |      |           |      |           |      |



| Additional Parameters |        |   | 40Ar/39Ar | 1σ       | 37Ar/39Ar | 1σ       | 36Ar/39Ar | 1σ       | Time (days) | 37Ar (decay) | 39Ar (decay) | 40Ar (moles) |
|-----------------------|--------|---|-----------|----------|-----------|----------|-----------|----------|-------------|--------------|--------------|--------------|
| 15D10222              | 2.0 %  | ✓ | 2.785488  | 0.009353 | 0.579424  | 0.017525 | 0.009310  | 0.000082 | 91.774      | 6.142184     | 1.00064865   | 1.963E-12    |
| 15D10224              | 2.2 %  | ✓ | 1.833333  | 0.006241 | 0.531007  | 0.014936 | 0.006199  | 0.000062 | 91.792      | 6.144459     | 1.00064878   | 1.621E-12    |
| 15D10225              | 2.4 %  | ✓ | 1.346731  | 0.004641 | 0.554063  | 0.011627 | 0.004560  | 0.000048 | 91.803      | 6.145723     | 1.00064885   | 1.454E-12    |
| 15D10226              | 2.6 %  | ✓ | 1.043795  | 0.003604 | 0.536963  | 0.009621 | 0.003526  | 0.000034 | 91.813      | 6.146904     | 1.00064892   | 1.396E-12    |
| 15D10228              | 2.8 %  | ✓ | 0.861684  | 0.002391 | 0.518004  | 0.006675 | 0.002872  | 0.000027 | 91.831      | 6.149181     | 1.00064905   | 1.723E-12    |
| 15D10229              | 3.0 %  | ✓ | 0.691545  | 0.002032 | 0.510269  | 0.005930 | 0.002285  | 0.000022 | 91.841      | 6.150362     | 1.00064912   | 1.599E-12    |
| 15D10230              | 3.3 %  | ✓ | 0.605405  | 0.002532 | 0.490041  | 0.007586 | 0.002030  | 0.000028 | 91.851      | 6.151543     | 1.00064919   | 1.079E-12    |
| 15D10231              | 3.6 %  | ✓ | 0.526059  | 0.000972 | 0.470430  | 0.003072 | 0.001736  | 0.000013 | 91.860      | 6.152640     | 1.00064925   | 2.606E-12    |
| 15D10233              | 3.9 %  | ✓ | 0.417985  | 0.001172 | 0.463781  | 0.003678 | 0.001395  | 0.000014 | 91.878      | 6.154834     | 1.00064938   | 1.615E-12    |
| 15D10234              | 4.3 %  | ✓ | 0.372340  | 0.001067 | 0.442161  | 0.003313 | 0.001209  | 0.000012 | 91.888      | 6.156016     | 1.00064945   | 1.561E-12    |
| 15D10235              | 4.6 %  | ✓ | 0.339089  | 0.000945 | 0.429146  | 0.002960 | 0.001100  | 0.000011 | 91.896      | 6.157030     | 1.00064951   | 1.643E-12    |
| 15D10236              | 4.9 %  | ✓ | 0.307279  | 0.000775 | 0.418008  | 0.002569 | 0.000965  | 0.000009 | 91.905      | 6.158128     | 1.00064957   | 1.798E-12    |
| 15D10238              | 5.2 %  | ✓ | 0.278334  | 0.000678 | 0.409003  | 0.002363 | 0.000890  | 0.000008 | 91.922      | 6.160240     | 1.00064970   | 1.860E-12    |
| 15D10239              | 5.5 %  | ✓ | 0.261942  | 0.000444 | 0.395613  | 0.001772 | 0.000825  | 0.000006 | 91.931      | 6.161254     | 1.00064975   | 2.790E-12    |
| 15D10240              | 5.8 %  | ✓ | 0.208888  | 0.000641 | 0.382340  | 0.002206 | 0.000652  | 0.000007 | 91.940      | 6.162353     | 1.00064982   | 1.471E-12    |
| 15D10242              | 6.1 %  | ✓ | 0.199335  | 0.000633 | 0.377799  | 0.002217 | 0.000605  | 0.000007 | 91.957      | 6.164466     | 1.00064994   | 1.396E-12    |
| 15D10243              | 6.5 %  | ✓ | 0.198424  | 0.000538 | 0.370868  | 0.001949 | 0.000600  | 0.000006 | 91.965      | 6.165481     | 1.00065000   | 1.651E-12    |
| 15D10244              | 7.0 %  | ✓ | 0.194380  | 0.000413 | 0.364545  | 0.001652 | 0.000585  | 0.000005 | 91.974      | 6.166580     | 1.00065006   | 2.173E-12    |
| 15D10246              | 7.6 %  | ✓ | 0.178880  | 0.000397 | 0.357539  | 0.001598 | 0.000534  | 0.000005 | 91.992      | 6.168695     | 1.00065019   | 2.074E-12    |
| 15D10247              | 8.4 %  | ✓ | 0.174578  | 0.000331 | 0.356400  | 0.001478 | 0.000514  | 0.000004 | 92.000      | 6.169711     | 1.00065025   | 2.454E-12    |
| 15D10248              | 9.4 %  | ✓ | 0.177275  | 0.000292 | 0.351361  | 0.001404 | 0.000529  | 0.000004 | 92.009      | 6.170811     | 1.00065031   | 2.951E-12    |
| 15D10250              | 10.5 % | ✓ | 0.198000  | 0.000313 | 0.351023  | 0.001455 | 0.000599  | 0.000004 | 92.026      | 6.172928     | 1.00065043   | 3.037E-12    |
| 15D10251              | 11.7 % | ✓ | 0.241498  | 0.000360 | 0.352746  | 0.001521 | 0.000749  | 0.000005 | 92.035      | 6.173944     | 1.00065049   | 3.271E-12    |
| 15D10252              | 13.1 % | ✓ | 0.393470  | 0.000394 | 0.425543  | 0.001649 | 0.001271  | 0.000006 | 92.044      | 6.175045     | 1.00065055   | 5.938E-12    |
| 15D10254              | 14.7 % | ✓ | 0.550116  | 0.000520 | 0.507334  | 0.001970 | 0.001817  | 0.000008 | 92.061      | 6.177163     | 1.00065068   | 6.757E-12    |
| 15D10255              | 16.5 % | ✓ | 0.720047  | 0.000685 | 0.765141  | 0.002885 | 0.002458  | 0.000011 | 92.069      | 6.178180     | 1.00065074   | 6.731E-12    |
| 15D10256              | 18.5 % | ✓ | 0.764311  | 0.001038 | 1.195963  | 0.004809 | 0.002743  | 0.000015 | 92.078      | 6.179281     | 1.00065080   | 3.949E-12    |
| 15D10258              | 19.8 % | ✓ | 0.818135  | 0.001580 | 1.609782  | 0.006860 | 0.003029  | 0.000022 | 92.097      | 6.181485     | 1.00065093   | 2.568E-12    |
| 15D10259              | 21.7 % | ✓ | 0.911853  | 0.002061 | 3.001732  | 0.011749 | 0.003717  | 0.000027 | 92.106      | 6.182588     | 1.00065099   | 2.162E-12    |
| 15D10260              | 22.8 % | ✓ | 0.967763  | 0.003350 | 3.301241  | 0.015068 | 0.003986  | 0.000038 | 92.115      | 6.183690     | 1.00065105   | 1.374E-12    |
| 15D10262              | 24.3 % | ✓ | 1.032709  | 0.004736 | 3.752615  | 0.019423 | 0.004310  | 0.000049 | 92.132      | 6.185811     | 1.00065118   | 1.032E-12    |



| Procedure<br>Blanks |        | 36Ar<br>[fA] | 1σ        | 37Ar<br>[fA] | 1σ        | 38Ar<br>[fA] | 1σ        | 39Ar<br>[fA] | 1σ        | 40Ar<br>[fA] | 1σ        |
|---------------------|--------|--------------|-----------|--------------|-----------|--------------|-----------|--------------|-----------|--------------|-----------|
| 15D10222            | 2.0 %  | 0.0114357    | 0.0005239 | 0.0200487    | 0.0295490 | 0.0335070    | 0.0268654 | 0.0075077    | 0.0247177 | 3.2374965    | 0.0854498 |
| 15D10224            | 2.2 %  | 0.0113928    | 0.0005239 | 0.0195342    | 0.0295490 | 0.0290856    | 0.0268654 | 0.0424334    | 0.0247177 | 3.2323380    | 0.0854498 |
| 15D10225            | 2.4 %  | 0.0113689    | 0.0005239 | 0.0192400    | 0.0295490 | 0.0267937    | 0.0268654 | 0.0563595    | 0.0247177 | 3.2294721    | 0.0854498 |
| 15D10226            | 2.6 %  | 0.0113467    | 0.0005239 | 0.0189600    | 0.0295490 | 0.0247608    | 0.0268654 | 0.0662795    | 0.0247177 | 3.2267974    | 0.0854498 |
| 15D10228            | 2.8 %  | 0.0113038    | 0.0005239 | 0.0184052    | 0.0295490 | 0.0211292    | 0.0268654 | 0.0781744    | 0.0247177 | 3.2216388    | 0.0854498 |
| 15D10229            | 3.0 %  | 0.0112815    | 0.0005239 | 0.0181099    | 0.0295490 | 0.0193960    | 0.0268654 | 0.0811449    | 0.0247177 | 3.2189640    | 0.0854498 |
| 15D10230            | 3.3 %  | 0.0112593    | 0.0005239 | 0.0178093    | 0.0295490 | 0.0177653    | 0.0268654 | 0.0822886    | 0.0247177 | 3.2162893    | 0.0854498 |
| 15D10231            | 3.6 %  | 0.0112386    | 0.0005239 | 0.0175255    | 0.0295490 | 0.0163428    | 0.0268654 | 0.0819384    | 0.0247177 | 3.2138055    | 0.0854498 |
| 15D10233            | 3.9 %  | 0.0111973    | 0.0005239 | 0.0169444    | 0.0295490 | 0.0137625    | 0.0268654 | 0.0779381    | 0.0247177 | 3.2088381    | 0.0854498 |
| 15D10234            | 4.3 %  | 0.0111750    | 0.0005239 | 0.0166241    | 0.0295490 | 0.0125194    | 0.0268654 | 0.0743627    | 0.0247177 | 3.2061633    | 0.0854498 |
| 15D10235            | 4.6 %  | 0.0111560    | 0.0005239 | 0.0163453    | 0.0295490 | 0.0115354    | 0.0268654 | 0.0707095    | 0.0247177 | 3.2038706    | 0.0854498 |
| 15D10236            | 4.9 %  | 0.0111353    | 0.0005239 | 0.0160390    | 0.0295490 | 0.0105543    | 0.0268654 | 0.0662854    | 0.0247177 | 3.2013869    | 0.0854498 |
| 15D10238            | 5.2 %  | 0.0110956    | 0.0005239 | 0.0154372    | 0.0295490 | 0.0089156    | 0.0268654 | 0.0569168    | 0.0247177 | 3.1966104    | 0.0854498 |
| 15D10239            | 5.5 %  | 0.0110765    | 0.0005239 | 0.0151424    | 0.0295490 | 0.0082451    | 0.0268654 | 0.0522323    | 0.0247177 | 3.1943178    | 0.0854498 |
| 15D10240            | 5.8 %  | 0.0110559    | 0.0005239 | 0.0148187    | 0.0295490 | 0.0076035    | 0.0268654 | 0.0471617    | 0.0247177 | 3.1918340    | 0.0854498 |
| 15D10242            | 6.1 %  | 0.0110161    | 0.0005239 | 0.0141836    | 0.0295490 | 0.0066179    | 0.0268654 | 0.0377839    | 0.0247177 | 3.1870576    | 0.0854498 |
| 15D10243            | 6.5 %  | 0.0109971    | 0.0005239 | 0.0138728    | 0.0295490 | 0.0062607    | 0.0268654 | 0.0336048    | 0.0247177 | 3.1847650    | 0.0854498 |
| 15D10244            | 7.0 %  | 0.0109764    | 0.0005239 | 0.0135318    | 0.0295490 | 0.0059588    | 0.0268654 | 0.0294063    | 0.0247177 | 3.1822812    | 0.0854498 |
| 15D10246            | 7.6 %  | 0.0109367    | 0.0005239 | 0.0128633    | 0.0295490 | 0.0056261    | 0.0268654 | 0.0225111    | 0.0247177 | 3.1775048    | 0.0854498 |
| 15D10247            | 8.4 %  | 0.0109176    | 0.0005239 | 0.0125365    | 0.0295490 | 0.0055825    | 0.0268654 | 0.0198336    | 0.0247177 | 3.1752121    | 0.0854498 |
| 15D10248            | 9.4 %  | 0.0108969    | 0.0005239 | 0.0121781    | 0.0295490 | 0.0056200    | 0.0268654 | 0.0174397    | 0.0247177 | 3.1727284    | 0.0854498 |
| 15D10250            | 10.5 % | 0.0108572    | 0.0005239 | 0.0114762    | 0.0295490 | 0.0059405    | 0.0268654 | 0.0143926    | 0.0247177 | 3.1679520    | 0.0854498 |
| 15D10251            | 11.7 % | 0.0108381    | 0.0005239 | 0.0111334    | 0.0295490 | 0.0062102    | 0.0268654 | 0.0136718    | 0.0247177 | 3.1656593    | 0.0854498 |
| 15D10252            | 13.1 % | 0.0108175    | 0.0005239 | 0.0107577    | 0.0295490 | 0.0065874    | 0.0268654 | 0.0134293    | 0.0247177 | 3.1631756    | 0.0854498 |
| 15D10254            | 14.7 % | 0.0107777    | 0.0005239 | 0.0100225    | 0.0295490 | 0.0075608    | 0.0268654 | 0.0144687    | 0.0247177 | 3.1583992    | 0.0854498 |
| 15D10255            | 16.5 % | 0.0107587    | 0.0005239 | 0.0096636    | 0.0295490 | 0.0081440    | 0.0268654 | 0.0156192    | 0.0247177 | 3.1561065    | 0.0854498 |
| 15D10256            | 18.5 % | 0.0107380    | 0.0005239 | 0.0092706    | 0.0295490 | 0.0088607    | 0.0268654 | 0.0172888    | 0.0247177 | 3.1536228    | 0.0854498 |
| 15D10258            | 19.8 % | 0.0106967    | 0.0005239 | 0.0084709    | 0.0295490 | 0.0105590    | 0.0268654 | 0.0217191    | 0.0247177 | 3.1486553    | 0.0854498 |
| 15D10259            | 21.7 % | 0.0106760    | 0.0005239 | 0.0080643    | 0.0295490 | 0.0115406    | 0.0268654 | 0.0243373    | 0.0247177 | 3.1461716    | 0.0854498 |
| 15D10260            | 22.8 % | 0.0106554    | 0.0005239 | 0.0076532    | 0.0295490 | 0.0126104    | 0.0268654 | 0.0271120    | 0.0247177 | 3.1436878    | 0.0854498 |
| 15D10262            | 24.3 % | 0.0106157    | 0.0005239 | 0.0068499    | 0.0295490 | 0.0149160    | 0.0268654 | 0.0325232    | 0.0247177 | 3.1389114    | 0.0854498 |



| OSU Argon Geochronology Lab |        |           |           |        |                |         |        |        |                |           |           |        |                |          |        |        |                |           |         |        |                |    |    |  |  |
|-----------------------------|--------|-----------|-----------|--------|----------------|---------|--------|--------|----------------|-----------|-----------|--------|----------------|----------|--------|--------|----------------|-----------|---------|--------|----------------|----|----|--|--|
| Intercept<br>Values         | 36Ar   |           |           |        |                | 37Ar    |        |        |                |           | 38Ar      |        |                |          |        | 39Ar   |                |           |         |        | 40Ar           |    |    |  |  |
|                             | [fA]   | 1σ        | r2        |        |                | [fA]    | 1σ     | r2     |                |           | [fA]      | 1σ     | r2             |          |        | [fA]   | 1σ             | r2        |         |        | [fA]           | 1σ | r2 |  |  |
| 15D10222                    | 2.0 %  | 0.1397742 | 0.0008721 | 0.0302 | EXP 150 of 150 | 1.3783  | 0.0280 | 0.0589 | EXP 150 of 150 | 0.2320729 | 0.0258660 | 0.0289 | EXP 150 of 150 | 14.5862  | 0.0252 | 0.9330 | EXP 150 of 150 | 44.25713  | 0.03315 | 0.9955 | EXP 150 of 150 |    |    |  |  |
| 15D10224                    | 2.2 %  | 0.1185676 | 0.0008531 | 0.0252 | EXP 149 of 150 | 1.5802  | 0.0319 | 0.0045 | EXP 150 of 150 | 0.2065430 | 0.0276641 | 0.0014 | EXP 150 of 150 | 18.3280  | 0.0252 | 0.9538 | EXP 150 of 150 | 37.09500  | 0.03515 | 0.9949 | EXP 150 of 150 |    |    |  |  |
| 15D10225                    | 2.4 %  | 0.1076802 | 0.0007967 | 0.0007 | EXP 150 of 150 | 2.0081  | 0.0285 | 0.1837 | EXP 149 of 150 | 0.2856810 | 0.0264639 | 0.0152 | EXP 150 of 150 | 22.3940  | 0.0263 | 0.9673 | EXP 150 of 150 | 33.61663  | 0.02940 | 0.9965 | EXP 150 of 150 |    |    |  |  |
| 15D10226                    | 2.6 %  | 0.1035900 | 0.0006722 | 0.0021 | EXP 150 of 150 | 2.4061  | 0.0297 | 0.1835 | EXP 150 of 150 | 0.3207573 | 0.0276072 | 0.0003 | EXP 150 of 150 | 27.7366  | 0.0301 | 0.9735 | EXP 150 of 150 | 32.40115  | 0.02825 | 0.9968 | EXP 150 of 150 |    |    |  |  |
| 15D10228                    | 2.8 %  | 0.1236445 | 0.0008401 | 0.0147 | EXP 150 of 150 | 3.4597  | 0.0309 | 0.3212 | EXP 150 of 150 | 0.5226959 | 0.0261128 | 0.0541 | EXP 150 of 150 | 41.4421  | 0.0296 | 0.9887 | EXP 150 of 150 | 39.22491  | 0.03173 | 0.9948 | EXP 150 of 150 |    |    |  |  |
| 15D10229                    | 3.0 %  | 0.1145909 | 0.0008016 | 0.0007 | EXP 150 of 150 | 3.9359  | 0.0319 | 0.3598 | EXP 150 of 150 | 0.5945898 | 0.0270917 | 0.0555 | EXP 150 of 150 | 47.8953  | 0.0308 | 0.9905 | EXP 150 of 150 | 36.61920  | 0.03312 | 0.9945 | EXP 150 of 150 |    |    |  |  |
| 15D10230                    | 3.3 %  | 0.0819921 | 0.0007743 | 0.0543 | EXP 150 of 150 | 2.9176  | 0.0323 | 0.1811 | EXP 150 of 150 | 0.4139859 | 0.0304122 | 0.0042 | EXP 150 of 150 | 36.9412  | 0.0271 | 0.9877 | EXP 149 of 150 | 25.75664  | 0.02943 | 0.9962 | EXP 150 of 150 |    |    |  |  |
| 15D10231                    | 3.6 %  | 0.1794231 | 0.0010340 | 0.1904 | EXP 150 of 150 | 7.7554  | 0.0318 | 0.6546 | EXP 150 of 150 | 1.2068345 | 0.0276044 | 0.0492 | EXP 150 of 150 | 102.5539 | 0.0327 | 0.9977 | EXP 150 of 150 | 57.66552  | 0.03330 | 0.9913 | EXP 150 of 150 |    |    |  |  |
| 15D10233                    | 3.9 %  | 0.1166110 | 0.0008634 | 0.0572 | EXP 150 of 150 | 5.9643  | 0.0309 | 0.5948 | EXP 150 of 150 | 0.9187235 | 0.0275581 | 0.0190 | EXP 150 of 150 | 79.9955  | 0.0301 | 0.9969 | EXP 150 of 150 | 36.95119  | 0.03010 | 0.9949 | EXP 150 of 150 |    |    |  |  |
| 15D10234                    | 4.3 %  | 0.1102823 | 0.0007725 | 0.0002 | EXP 150 of 150 | 6.1673  | 0.0287 | 0.6067 | EXP 150 of 150 | 1.0105292 | 0.0281273 | 0.0402 | EXP 150 of 150 | 86.7817  | 0.0353 | 0.9962 | EXP 150 of 150 | 35.81747  | 0.02696 | 0.9960 | EXP 150 of 150 |    |    |  |  |
| 15D10235                    | 4.6 %  | 0.1154233 | 0.0008127 | 0.0034 | EXP 150 of 150 | 6.9157  | 0.0293 | 0.6136 | EXP 150 of 150 | 1.1276699 | 0.0279518 | 0.0153 | EXP 150 of 150 | 100.2985 | 0.0360 | 0.9971 | EXP 150 of 150 | 37.53393  | 0.03358 | 0.9937 | EXP 150 of 150 |    |    |  |  |
| 15D10236                    | 4.9 %  | 0.1215745 | 0.0008443 | 0.0036 | EXP 150 of 150 | 8.1299  | 0.0297 | 0.7149 | EXP 150 of 150 | 1.4264081 | 0.0264218 | 0.1506 | EXP 149 of 150 | 121.1011 | 0.0335 | 0.9983 | EXP 150 of 150 | 40.76922  | 0.03022 | 0.9945 | EXP 150 of 150 |    |    |  |  |
| 15D10238                    | 5.2 %  | 0.1274475 | 0.0008300 | 0.0562 | EXP 150 of 150 | 9.0808  | 0.0309 | 0.7563 | EXP 150 of 150 | 1.6010577 | 0.0250798 | 0.1089 | EXP 150 of 150 | 138.3084 | 0.0352 | 0.9985 | EXP 150 of 150 | 42.06610  | 0.02962 | 0.9942 | EXP 150 of 150 |    |    |  |  |
| 15D10239                    | 5.5 %  | 0.1830186 | 0.0011052 | 0.1787 | EXP 150 of 150 | 13.9858 | 0.0297 | 0.8828 | EXP 150 of 150 | 2.6171200 | 0.0254761 | 0.2636 | EXP 150 of 150 | 220.3611 | 0.0374 | 0.9994 | EXP 150 of 150 | 61.48647  | 0.03012 | 0.9920 | EXP 150 of 150 |    |    |  |  |
| 15D10240                    | 5.8 %  | 0.1008934 | 0.0007723 | 0.0021 | EXP 150 of 150 | 8.9412  | 0.0299 | 0.7174 | EXP 150 of 150 | 1.6906084 | 0.0276466 | 0.0921 | EXP 150 of 150 | 145.7231 | 0.0377 | 0.9985 | EXP 150 of 150 | 33.92978  | 0.03346 | 0.9939 | EXP 150 of 150 |    |    |  |  |
| 15D10242                    | 6.1 %  | 0.0938339 | 0.0007028 | 0.0779 | EXP 150 of 150 | 8.7826  | 0.0303 | 0.7526 | EXP 150 of 150 | 1.7118400 | 0.0295192 | 0.0892 | EXP 150 of 150 | 144.9050 | 0.0357 | 0.9986 | EXP 150 of 150 | 32.35641  | 0.02890 | 0.9952 | EXP 150 of 150 |    |    |  |  |
| 15D10243                    | 6.5 %  | 0.1086261 | 0.0008537 | 0.0110 | EXP 150 of 150 | 10.2385 | 0.0292 | 0.8137 | EXP 150 of 150 | 2.0917578 | 0.0263377 | 0.2373 | EXP 150 of 150 | 172.1456 | 0.0390 | 0.9988 | EXP 150 of 150 | 37.68148  | 0.02935 | 0.9947 | EXP 150 of 150 |    |    |  |  |
| 15D10244                    | 7.0 %  | 0.1388156 | 0.0009477 | 0.0028 | EXP 149 of 150 | 13.5154 | 0.0291 | 0.8752 | EXP 150 of 150 | 2.7492876 | 0.0273530 | 0.2846 | EXP 150 of 150 | 231.2916 | 0.0393 | 0.9994 | EXP 150 of 150 | 48.58987  | 0.03274 | 0.9924 | EXP 150 of 150 |    |    |  |  |
| 15D10246                    | 7.6 %  | 0.1320249 | 0.0008810 | 0.0003 | EXP 150 of 150 | 13.7438 | 0.0283 | 0.8762 | EXP 150 of 150 | 2.8595927 | 0.0272912 | 0.2447 | EXP 149 of 150 | 239.8980 | 0.0439 | 0.9993 | EXP 150 of 150 | 46.52064  | 0.03268 | 0.9927 | EXP 150 of 150 |    |    |  |  |
| 15D10247                    | 8.4 %  | 0.1521750 | 0.0009441 | 0.0004 | EXP 150 of 150 | 16.5974 | 0.0285 | 0.9124 | EXP 150 of 150 | 3.5204097 | 0.0273440 | 0.3810 | EXP 150 of 150 | 290.7276 | 0.0435 | 0.9995 | EXP 150 of 150 | 54.43989  | 0.03145 | 0.9928 | EXP 150 of 150 |    |    |  |  |
| 15D10248                    | 9.4 %  | 0.1830799 | 0.0010179 | 0.0787 | EXP 150 of 150 | 19.3768 | 0.0310 | 0.9283 | EXP 150 of 150 | 4.1505244 | 0.0266101 | 0.4533 | EXP 150 of 150 | 344.3793 | 0.0471 | 0.9996 | EXP 150 of 150 | 64.83737  | 0.03620 | 0.9894 | EXP 150 of 150 |    |    |  |  |
| 15D10250                    | 10.5 % | 0.1906926 | 0.0009876 | 0.1437 | EXP 150 of 150 | 17.8312 | 0.0326 | 0.9039 | EXP 150 of 150 | 3.8723717 | 0.0276313 | 0.4077 | EXP 150 of 150 | 317.3167 | 0.0465 | 0.9995 | EXP 150 of 150 | 66.62964  | 0.03085 | 0.9905 | EXP 150 of 150 |    |    |  |  |
| 15D10251                    | 11.7 % | 0.2093559 | 0.0010034 | 0.3349 | EXP 150 of 150 | 15.8218 | 0.0317 | 0.8859 | EXP 148 of 150 | 3.4853577 | 0.0275005 | 0.3091 | EXP 150 of 150 | 280.2127 | 0.0444 | 0.9994 | EXP 150 of 150 | 71.51802  | 0.03096 | 0.9866 | EXP 150 of 150 |    |    |  |  |
| 15D10252                    | 13.1 % | 0.3858823 | 0.0015017 | 0.6138 | EXP 150 of 150 | 21.2558 | 0.0300 | 0.9457 | EXP 150 of 150 | 4.1109100 | 0.0260757 | 0.4272 | EXP 150 of 150 | 312.1685 | 0.0426 | 0.9996 | EXP 150 of 150 | 127.23000 | 0.03557 | 0.0340 | EXP 150 of 150 |    |    |  |  |
| 15D10254                    | 14.7 % | 0.4473537 | 0.0015083 | 0.7226 | EXP 150 of 150 | 20.6181 | 0.0286 | 0.9440 | EXP 150 of 150 | 3.5656429 | 0.0283900 | 0.4061 | EXP 150 of 150 | 254.0815 | 0.0391 | 0.9995 | EXP 150 of 150 | 144.33919 | 0.03874 | 0.9028 | EXP 150 of 150 |    |    |  |  |
| 15D10255                    | 16.5 % | 0.4601898 | 0.0015455 | 0.7208 | EXP 150 of 150 | 23.6614 | 0.0293 | 0.9538 | EXP 150 of 150 | 2.8084502 | 0.0266005 | 0.2767 | EXP 150 of 150 | 193.3900 | 0.0376 | 0.9991 | EXP 150 of 150 | 143.80385 | 0.03514 | 0.9357 | EXP 150 of 150 |    |    |  |  |
| 15D10256                    | 18.5 % | 0.2879829 | 0.0011641 | 0.5968 | EXP 150 of 150 | 20.4395 | 0.0345 | 0.9195 | EXP 150 of 150 | 1.4796887 | 0.0282843 | 0.0330 | EXP 150 of 150 | 106.9004 | 0.0348 | 0.9976 | EXP 150 of 150 | 85.67228  | 0.03609 | 0.8907 | EXP 150 of 150 |    |    |  |  |
| 15D10258                    | 19.8 % | 0.1966444 | 0.0010909 | 0.4077 | EXP 150 of 150 | 16.7076 | 0.0316 | 0.9021 | EXP 150 of 150 | 0.9125172 | 0.0249822 | 0.0263 | EXP 150 of 150 | 64.9500  | 0.0317 | 0.9944 | EXP 150 of 150 | 56.80638  | 0.03353 | 0.9732 | EXP 150 of 150 |    |    |  |  |
| 15D10259                    | 21.7 % | 0.1830818 | 0.0010343 | 0.2884 | EXP 150 of 150 | 23.5284 | 0.0337 | 0.9398 | EXP 150 of 150 | 0.7121655 | 0.0287025 | 0.0223 | EXP 150 of 150 | 49.0765  | 0.0297 | 0.9915 | EXP 149 of 150 | 48.32724  | 0.03165 | 0.9818 | EXP 150 of 150 |    |    |  |  |
| 15D10260                    | 22.8 % | 0.1213365 | 0.0008444 | 0.0994 | EXP 150 of 150 | 15.4928 | 0.0326 | 0.8772 | EXP 150 of 150 | 0.4071028 | 0.0241761 | 0.0018 | EXP 150 of 150 | 29.3969  | 0.0290 | 0.9769 | EXP 150 of 150 | 31.85437  | 0.02901 | 0.9905 | EXP 150 of 150 |    |    |  |  |
| 15D10262                    | 24.3 % | 0.0948991 | 0.0007542 | 0.0171 | EXP 150 of 150 | 12.3973 | 0.0325 | 0.8122 | EXP 150 of 150 | 0.2662932 | 0.0292671 | 0.0048 | EXP 150 of 150 | 20.7133  | 0.0270 | 0.9554 | EXP 150 of 150 | 24.71227  | 0.02884 | 0.9917 | EXP 150 of 150 |    |    |  |  |



| OSU Argon Geochronology Lab |        |           |            |                   |             |      |                  |                  |       |                     |                    |       |            |       |               |       |             |       |              |                        |     |       |      |      |     |        |             |       |       |         |
|-----------------------------|--------|-----------|------------|-------------------|-------------|------|------------------|------------------|-------|---------------------|--------------------|-------|------------|-------|---------------|-------|-------------|-------|--------------|------------------------|-----|-------|------|------|-----|--------|-------------|-------|-------|---------|
| Sample Parameters           |        | Sample    | Material   | Location          | Analyst     | Temp | Standard Name    | Standard (in Ma) | %1σ   | Standard Reference  | Standard 40Ar/39Ar | %1σ   | J          | %1σ   | Air 40Ar/36Ar | %1σ   | MDF (lin)   | %1σ   | Volume Ratio | Sensitivity (mol/volt) | Day | Month | Year | Hour | Min | Resist | Irradiation | X-pos | Y-pos | Z/H-pos |
| 15D10222                    | 2.0 %  | 1180256-1 | Groundmass | Kerguelen Plateau | Dan Miggins | 2    | FCT-NM (7B27-14) | 28.201           | 0.082 | Kuiper et al (2008) | 8.99878            | 0.114 | 0.00174661 | 0.114 | 303.357       | 0.116 | 0.993516587 | 0.065 | 1            | 4.8E-14                | 2   | APR   | 2015 | 9    | 40  | 1      | 14-OSU-07   | 0.00  | 0.00  | 39.40   |
| 15D10224                    | 2.2 %  | 1180256-1 | Groundmass | Kerguelen Plateau | Dan Miggins | 2.2  | FCT-NM (7B27-14) | 28.201           | 0.082 | Kuiper et al (2008) | 8.99878            | 0.114 | 0.00174661 | 0.114 | 303.357       | 0.116 | 0.993516587 | 0.065 | 1            | 4.8E-14                | 2   | APR   | 2015 | 10   | 7   | 1      | 14-OSU-07   | 0.00  | 0.00  | 39.40   |
| 15D10225                    | 2.4 %  | 1180256-1 | Groundmass | Kerguelen Plateau | Dan Miggins | 2.4  | FCT-NM (7B27-14) | 28.201           | 0.082 | Kuiper et al (2008) | 8.99878            | 0.114 | 0.00174661 | 0.114 | 303.357       | 0.116 | 0.993516587 | 0.065 | 1            | 4.8E-14                | 2   | APR   | 2015 | 10   | 22  | 1      | 14-OSU-07   | 0.00  | 0.00  | 39.40   |
| 15D10226                    | 2.6 %  | 1180256-1 | Groundmass | Kerguelen Plateau | Dan Miggins | 2.6  | FCT-NM (7B27-14) | 28.201           | 0.082 | Kuiper et al (2008) | 8.99878            | 0.114 | 0.00174661 | 0.114 | 303.357       | 0.116 | 0.993516587 | 0.065 | 1            | 4.8E-14                | 2   | APR   | 2015 | 10   | 36  | 1      | 14-OSU-07   | 0.00  | 0.00  | 39.40   |
| 15D10228                    | 2.8 %  | 1180256-1 | Groundmass | Kerguelen Plateau | Dan Miggins | 2.8  | FCT-NM (7B27-14) | 28.201           | 0.082 | Kuiper et al (2008) | 8.99878            | 0.114 | 0.00174661 | 0.114 | 303.357       | 0.116 | 0.993516587 | 0.065 | 1            | 4.8E-14                | 2   | APR   | 2015 | 11   | 3   | 1      | 14-OSU-07   | 0.00  | 0.00  | 39.40   |
| 15D10229                    | 3.0 %  | 1180256-1 | Groundmass | Kerguelen Plateau | Dan Miggins | 3    | FCT-NM (7B27-14) | 28.201           | 0.082 | Kuiper et al (2008) | 8.99878            | 0.114 | 0.00174661 | 0.114 | 303.357       | 0.116 | 0.993516587 | 0.065 | 1            | 4.8E-14                | 2   | APR   | 2015 | 11   | 17  | 1      | 14-OSU-07   | 0.00  | 0.00  | 39.40   |
| 15D10230                    | 3.3 %  | 1180256-1 | Groundmass | Kerguelen Plateau | Dan Miggins | 3.3  | FCT-NM (7B27-14) | 28.201           | 0.082 | Kuiper et al (2008) | 8.99878            | 0.114 | 0.00174661 | 0.114 | 303.357       | 0.116 | 0.993516587 | 0.065 | 1            | 4.8E-14                | 2   | APR   | 2015 | 11   | 31  | 1      | 14-OSU-07   | 0.00  | 0.00  | 39.40   |
| 15D10231                    | 3.6 %  | 1180256-1 | Groundmass | Kerguelen Plateau | Dan Miggins | 3.6  | FCT-NM (7B27-14) | 28.201           | 0.082 | Kuiper et al (2008) | 8.99878            | 0.114 | 0.00174661 | 0.114 | 303.357       | 0.116 | 0.993516587 | 0.065 | 1            | 4.8E-14                | 2   | APR   | 2015 | 11   | 44  | 1      | 14-OSU-07   | 0.00  | 0.00  | 39.40   |
| 15D10233                    | 3.9 %  | 1180256-1 | Groundmass | Kerguelen Plateau | Dan Miggins | 3.9  | FCT-NM (7B27-14) | 28.201           | 0.082 | Kuiper et al (2008) | 8.99878            | 0.114 | 0.00174661 | 0.114 | 303.357       | 0.116 | 0.993516587 | 0.065 | 1            | 4.8E-14                | 2   | APR   | 2015 | 12   | 10  | 1      | 14-OSU-07   | 0.00  | 0.00  | 39.40   |
| 15D10234                    | 4.3 %  | 1180256-1 | Groundmass | Kerguelen Plateau | Dan Miggins | 4.3  | FCT-NM (7B27-14) | 28.201           | 0.082 | Kuiper et al (2008) | 8.99878            | 0.114 | 0.00174661 | 0.114 | 303.357       | 0.116 | 0.993516587 | 0.065 | 1            | 4.8E-14                | 2   | APR   | 2015 | 12   | 24  | 1      | 14-OSU-07   | 0.00  | 0.00  | 39.40   |
| 15D10235                    | 4.6 %  | 1180256-1 | Groundmass | Kerguelen Plateau | Dan Miggins | 4.6  | FCT-NM (7B27-14) | 28.201           | 0.082 | Kuiper et al (2008) | 8.99878            | 0.114 | 0.00174661 | 0.114 | 303.357       | 0.116 | 0.993516587 | 0.065 | 1            | 4.8E-14                | 2   | APR   | 2015 | 12   | 36  | 1      | 14-OSU-07   | 0.00  | 0.00  | 39.40   |
| 15D10236                    | 4.9 %  | 1180256-1 | Groundmass | Kerguelen Plateau | Dan Miggins | 4.9  | FCT-NM (7B27-14) | 28.201           | 0.082 | Kuiper et al (2008) | 8.99878            | 0.114 | 0.00174661 | 0.114 | 303.357       | 0.116 | 0.993516587 | 0.065 | 1            | 4.8E-14                | 2   | APR   | 2015 | 12   | 49  | 1      | 14-OSU-07   | 0.00  | 0.00  | 39.40   |
| 15D10238                    | 5.2 %  | 1180256-1 | Groundmass | Kerguelen Plateau | Dan Miggins | 5.2  | FCT-NM (7B27-14) | 28.201           | 0.082 | Kuiper et al (2008) | 8.99878            | 0.114 | 0.00174661 | 0.114 | 303.357       | 0.116 | 0.993516587 | 0.065 | 1            | 4.8E-14                | 2   | APR   | 2015 | 13   | 14  | 1      | 14-OSU-07   | 0.00  | 0.00  | 39.40   |
| 15D10239                    | 5.5 %  | 1180256-1 | Groundmass | Kerguelen Plateau | Dan Miggins | 5.5  | FCT-NM (7B27-14) | 28.201           | 0.082 | Kuiper et al (2008) | 8.99878            | 0.114 | 0.00174661 | 0.114 | 303.357       | 0.116 | 0.993516587 | 0.065 | 1            | 4.8E-14                | 2   | APR   | 2015 | 13   | 26  | 1      | 14-OSU-07   | 0.00  | 0.00  | 39.40   |
| 15D10240                    | 5.8 %  | 1180256-1 | Groundmass | Kerguelen Plateau | Dan Miggins | 5.8  | FCT-NM (7B27-14) | 28.201           | 0.082 | Kuiper et al (2008) | 8.99878            | 0.114 | 0.00174661 | 0.114 | 303.357       | 0.116 | 0.993516587 | 0.065 | 1            | 4.8E-14                | 2   | APR   | 2015 | 13   | 39  | 1      | 14-OSU-07   | 0.00  | 0.00  | 39.40   |
| 15D10242                    | 6.1 %  | 1180256-1 | Groundmass | Kerguelen Plateau | Dan Miggins | 6.1  | FCT-NM (7B27-14) | 28.201           | 0.082 | Kuiper et al (2008) | 8.99878            | 0.114 | 0.00174661 | 0.114 | 303.357       | 0.116 | 0.993516587 | 0.065 | 1            | 4.8E-14                | 2   | APR   | 2015 | 14   | 4   | 1      | 14-OSU-07   | 0.00  | 0.00  | 39.40   |
| 15D10243                    | 6.5 %  | 1180256-1 | Groundmass | Kerguelen Plateau | Dan Miggins | 6.5  | FCT-NM (7B27-14) | 28.201           | 0.082 | Kuiper et al (2008) | 8.99878            | 0.114 | 0.00174661 | 0.114 | 303.357       | 0.116 | 0.993516587 | 0.065 | 1            | 4.8E-14                | 2   | APR   | 2015 | 14   | 16  | 1      | 14-OSU-07   | 0.00  | 0.00  | 39.40   |
| 15D10244                    | 7.0 %  | 1180256-1 | Groundmass | Kerguelen Plateau | Dan Miggins | 7    | FCT-NM (7B27-14) | 28.201           | 0.082 | Kuiper et al (2008) | 8.99878            | 0.114 | 0.00174661 | 0.114 | 303.357       | 0.116 | 0.993516587 | 0.065 | 1            | 4.8E-14                | 2   | APR   | 2015 | 14   | 29  | 1      | 14-OSU-07   | 0.00  | 0.00  | 39.40   |
| 15D10246                    | 7.6 %  | 1180256-1 | Groundmass | Kerguelen Plateau | Dan Miggins | 7.6  | FCT-NM (7B27-14) | 28.201           | 0.082 | Kuiper et al (2008) | 8.99878            | 0.114 | 0.00174661 | 0.114 | 303.357       | 0.116 | 0.993516587 | 0.065 | 1            | 4.8E-14                | 2   | APR   | 2015 | 14   | 54  | 1      | 14-OSU-07   | 0.00  | 0.00  | 39.40   |
| 15D10247                    | 8.4 %  | 1180256-1 | Groundmass | Kerguelen Plateau | Dan Miggins | 8.4  | FCT-NM (7B27-14) | 28.201           | 0.082 | Kuiper et al (2008) | 8.99878            | 0.114 | 0.00174661 | 0.114 | 303.357       | 0.116 | 0.993516587 | 0.065 | 1            | 4.8E-14                | 2   | APR   | 2015 | 15   | 6   | 1      | 14-OSU-07   | 0.00  | 0.00  | 39.40   |
| 15D10248                    | 9.4 %  | 1180256-1 | Groundmass | Kerguelen Plateau | Dan Miggins | 9.4  | FCT-NM (7B27-14) | 28.201           | 0.082 | Kuiper et al (2008) | 8.99878            | 0.114 | 0.00174661 | 0.114 | 303.357       | 0.116 | 0.993516587 | 0.065 | 1            | 4.8E-14                | 2   | APR   | 2015 | 15   | 19  | 1      | 14-OSU-07   | 0.00  | 0.00  | 39.40   |
| 15D10250                    | 10.5 % | 1180256-1 | Groundmass | Kerguelen Plateau | Dan Miggins | 10.5 | FCT-NM (7B27-14) | 28.201           | 0.082 | Kuiper et al (2008) | 8.99878            | 0.114 | 0.00174661 | 0.114 | 303.357       | 0.116 | 0.993516587 | 0.065 | 1            | 4.8E-14                | 2   | APR   | 2015 | 15   | 44  | 1      | 14-OSU-07   | 0.00  | 0.00  | 39.40   |
| 15D10251                    | 11.7 % | 1180256-1 | Groundmass | Kerguelen Plateau | Dan Miggins | 11.7 | FCT-NM (7B27-14) | 28.201           | 0.082 | Kuiper et al (2008) | 8.99878            | 0.114 | 0.00174661 | 0.114 | 303.357       | 0.116 | 0.993516587 | 0.065 | 1            | 4.8E-14                | 2   | APR   | 2015 | 15   | 56  | 1      | 14-OSU-07   | 0.00  | 0.00  | 39.40   |
| 15D10252                    | 13.1 % | 1180256-1 | Groundmass | Kerguelen Plateau | Dan Miggins | 13.1 | FCT-NM (7B27-14) | 28.201           | 0.082 | Kuiper et al (2008) | 8.99878            | 0.114 | 0.00174661 | 0.114 | 303.357       | 0.116 | 0.993516587 | 0.065 | 1            | 4.8E-14                | 2   | APR   | 2015 | 16   | 9   | 1      | 14-OSU-07   | 0.00  | 0.00  | 39.40   |
| 15D10254                    | 14.7 % | 1180256-1 | Groundmass | Kerguelen Plateau | Dan Miggins | 14.7 | FCT-NM (7B27-14) | 28.201           | 0.082 | Kuiper et al (2008) | 8.99878            | 0.114 | 0.00174661 | 0.114 | 303.357       | 0.116 | 0.993516587 | 0.065 | 1            | 4.8E-14                | 2   | APR   | 2015 | 16   | 34  | 1      | 14-OSU-07   | 0.00  | 0.00  | 39.40   |
| 15D10255                    | 16.5 % | 1180256-1 | Groundmass | Kerguelen Plateau | Dan Miggins | 16.5 | FCT-NM (7B27-14) | 28.201           | 0.082 | Kuiper et al (2008) | 8.99878            | 0.114 | 0.00174661 | 0.114 | 303.357       | 0.116 | 0.993516587 | 0.065 | 1            | 4.8E-14                | 2   | APR   | 2015 | 16   | 46  | 1      | 14-OSU-07   | 0.00  | 0.00  | 39.40   |
| 15D10256                    | 18.5 % | 1180256-1 | Groundmass | Kerguelen Plateau | Dan Miggins | 18.5 | FCT-NM (7B27-14) | 28.201           | 0.082 | Kuiper et al (2008) | 8.99878            | 0.114 | 0.00174661 | 0.114 | 303.357       | 0.116 | 0.993516587 | 0.065 | 1            | 4.8E-14                | 2   | APR   | 2015 | 16   | 59  | 1      | 14-OSU-07   | 0.00  | 0.00  | 39.40   |
| 15D10258                    | 19.8 % | 1180256-1 | Groundmass | Kerguelen Plateau | Dan Miggins | 19.8 | FCT-NM (7B27-14) | 28.201           | 0.082 | Kuiper et al (2008) | 8.99878            | 0.114 | 0.00174661 | 0.114 | 303.357       | 0.116 | 0.993516587 | 0.065 | 1            | 4.8E-14                | 2   | APR   | 2015 | 17   | 25  | 1      | 14-OSU-07   | 0.00  | 0.00  | 39.40   |
| 15D10259                    | 21.7 % | 1180256-1 | Groundmass | Kerguelen Plateau | Dan Miggins | 21.7 | FCT-NM (7B27-14) | 28.201           | 0.082 | Kuiper et al (2008) | 8.99878            | 0.114 | 0.00174661 | 0.114 | 303.357       | 0.116 | 0.993516587 | 0.065 | 1            | 4.8E-14                | 2   | APR   | 2015 | 17   | 38  | 1      | 14-OSU-07   | 0.00  | 0.00  | 39.40   |
| 15D10260                    | 22.8 % | 1180256-1 | Groundmass | Kerguelen Plateau | Dan Miggins | 22.8 | FCT-NM (7B27-14) | 28.201           | 0.082 | Kuiper et al (2008) | 8.99878            | 0.114 | 0.00174661 | 0.114 | 303.357       | 0.116 | 0.993516587 | 0.065 | 1            | 4.8E-14                | 2   | APR   | 2015 | 17   | 51  | 1      | 14-OSU-07   | 0.00  | 0.00  | 39.40   |
| 15D10262                    | 24.3 % | 1180256-1 | Groundmass | Kerguelen Plateau | Dan Miggins | 24.3 | FCT-NM (7B27-14) | 28.201           | 0.082 | Kuiper et al (2008) | 8.99878            | 0.114 | 0.00174661 | 0.114 | 303.357       | 0.116 | 0.993516587 | 0.065 | 1            | 4.8E-14                | 2   | APR   | 2015 | 18   | 16  | 1      | 14-OSU-07   | 0.00  | 0.00  | 39.40   |



[illegible]



| OSU Argon Geochronology Lab |          |       |          |       |          |        |          |       |           |          |           |           |           |          |          |         |          |         |           |     |      |      |      |     |       |     |   |
|-----------------------------|----------|-------|----------|-------|----------|--------|----------|-------|-----------|----------|-----------|-----------|-----------|----------|----------|---------|----------|---------|-----------|-----|------|------|------|-----|-------|-----|---|
| Irradiation<br>Constants    |          |       |          |       |          |        |          |       |           |          |           |           |           |          |          |         |          |         |           |     |      |      |      |     |       |     |   |
|                             | 40/36(a) | %1σ   | 40/36(c) | %1σ   | 38/36(a) | %1σ    | 38/36(c) | %1σ   | 39/37(ca) | %1σ      | 38/37(ca) | %1σ       | 36/37(ca) | %1σ      | 40/39(k) | %1σ     | 38/39(k) | %1σ     | 36/38(cl) | %1σ | K/Ca | %1σ  | K/Cl | %1σ | Ca/Cl | %1σ |   |
| 15D10222                    | 2.0 %    | 295.5 | 0        | 0.018 | 35       | 0.1869 | 0        | 1.493 | 3         | 0.000673 | 0         | 0.0000139 | 0         | 0.000264 | 0        | 0.00101 | 0        | 0.01138 | 0         | 0   | 0    | 0.43 | 0    | 0   | 0     | 0   | 0 |
| 15D10224                    | 2.2 %    | 295.5 | 0        | 0.018 | 35       | 0.1869 | 0        | 1.493 | 3         | 0.000673 | 0         | 0.0000139 | 0         | 0.000264 | 0        | 0.00101 | 0        | 0.01138 | 0         | 0   | 0    | 0.43 | 0    | 0   | 0     | 0   | 0 |
| 15D10225                    | 2.4 %    | 295.5 | 0        | 0.018 | 35       | 0.1869 | 0        | 1.493 | 3         | 0.000673 | 0         | 0.0000139 | 0         | 0.000264 | 0        | 0.00101 | 0        | 0.01138 | 0         | 0   | 0    | 0.43 | 0    | 0   | 0     | 0   | 0 |
| 15D10226                    | 2.6 %    | 295.5 | 0        | 0.018 | 35       | 0.1869 | 0        | 1.493 | 3         | 0.000673 | 0         | 0.0000139 | 0         | 0.000264 | 0        | 0.00101 | 0        | 0.01138 | 0         | 0   | 0    | 0.43 | 0    | 0   | 0     | 0   | 0 |
| 15D10228                    | 2.8 %    | 295.5 | 0        | 0.018 | 35       | 0.1869 | 0        | 1.493 | 3         | 0.000673 | 0         | 0.0000139 | 0         | 0.000264 | 0        | 0.00101 | 0        | 0.01138 | 0         | 0   | 0    | 0.43 | 0    | 0   | 0     | 0   | 0 |
| 15D10229                    | 3.0 %    | 295.5 | 0        | 0.018 | 35       | 0.1869 | 0        | 1.493 | 3         | 0.000673 | 0         | 0.0000139 | 0         | 0.000264 | 0        | 0.00101 | 0        | 0.01138 | 0         | 0   | 0    | 0.43 | 0    | 0   | 0     | 0   | 0 |
| 15D10230                    | 3.3 %    | 295.5 | 0        | 0.018 | 35       | 0.1869 | 0        | 1.493 | 3         | 0.000673 | 0         | 0.0000139 | 0         | 0.000264 | 0        | 0.00101 | 0        | 0.01138 | 0         | 0   | 0    | 0.43 | 0    | 0   | 0     | 0   | 0 |
| 15D10231                    | 3.6 %    | 295.5 | 0        | 0.018 | 35       | 0.1869 | 0        | 1.493 | 3         | 0.000673 | 0         | 0.0000139 | 0         | 0.000264 | 0        | 0.00101 | 0        | 0.01138 | 0         | 0   | 0    | 0.43 | 0    | 0   | 0     | 0   | 0 |
| 15D10233                    | 3.9 %    | 295.5 | 0        | 0.018 | 35       | 0.1869 | 0        | 1.493 | 3         | 0.000673 | 0         | 0.0000139 | 0         | 0.000264 | 0        | 0.00101 | 0        | 0.01138 | 0         | 0   | 0    | 0.43 | 0    | 0   | 0     | 0   | 0 |
| 15D10234                    | 4.3 %    | 295.5 | 0        | 0.018 | 35       | 0.1869 | 0        | 1.493 | 3         | 0.000673 | 0         | 0.0000139 | 0         | 0.000264 | 0        | 0.00101 | 0        | 0.01138 | 0         | 0   | 0    | 0.43 | 0    | 0   | 0     | 0   | 0 |
| 15D10235                    | 4.6 %    | 295.5 | 0        | 0.018 | 35       | 0.1869 | 0        | 1.493 | 3         | 0.000673 | 0         | 0.0000139 | 0         | 0.000264 | 0        | 0.00101 | 0        | 0.01138 | 0         | 0   | 0    | 0.43 | 0    | 0   | 0     | 0   | 0 |
| 15D10236                    | 4.9 %    | 295.5 | 0        | 0.018 | 35       | 0.1869 | 0        | 1.493 | 3         | 0.000673 | 0         | 0.0000139 | 0         | 0.000264 | 0        | 0.00101 | 0        | 0.01138 | 0         | 0   | 0    | 0.43 | 0    | 0   | 0     | 0   | 0 |
| 15D10238                    | 5.2 %    | 295.5 | 0        | 0.018 | 35       | 0.1869 | 0        | 1.493 | 3         | 0.000673 | 0         | 0.0000139 | 0         | 0.000264 | 0        | 0.00101 | 0        | 0.01138 | 0         | 0   | 0    | 0.43 | 0    | 0   | 0     | 0   | 0 |
| 15D10239                    | 5.5 %    | 295.5 | 0        | 0.018 | 35       | 0.1869 | 0        | 1.493 | 3         | 0.000673 | 0         | 0.0000139 | 0         | 0.000264 | 0        | 0.00101 | 0        | 0.01138 | 0         | 0   | 0    | 0.43 | 0    | 0   | 0     | 0   | 0 |
| 15D10240                    | 5.8 %    | 295.5 | 0        | 0.018 | 35       | 0.1869 | 0        | 1.493 | 3         | 0.000673 | 0         | 0.0000139 | 0         | 0.000264 | 0        | 0.00101 | 0        | 0.01138 | 0         | 0   | 0    | 0.43 | 0    | 0   | 0     | 0   | 0 |
| 15D10242                    | 6.1 %    | 295.5 | 0        | 0.018 | 35       | 0.1869 | 0        | 1.493 | 3         | 0.000673 | 0         | 0.0000139 | 0         | 0.000264 | 0        | 0.00101 | 0        | 0.01138 | 0         | 0   | 0    | 0.43 | 0    | 0   | 0     | 0   | 0 |
| 15D10243                    | 6.5 %    | 295.5 | 0        | 0.018 | 35       | 0.1869 | 0        | 1.493 | 3         | 0.000673 | 0         | 0.0000139 | 0         | 0.000264 | 0        | 0.00101 | 0        | 0.01138 | 0         | 0   | 0    | 0.43 | 0    | 0   | 0     | 0   | 0 |
| 15D10244                    | 7.0 %    | 295.5 | 0        | 0.018 | 35       | 0.1869 | 0        | 1.493 | 3         | 0.000673 | 0         | 0.0000139 | 0         | 0.000264 | 0        | 0.00101 | 0        | 0.01138 | 0         | 0   | 0    | 0.43 | 0    | 0   | 0     | 0   | 0 |
| 15D10246                    | 7.6 %    | 295.5 | 0        | 0.018 | 35       | 0.1869 | 0        | 1.493 | 3         | 0.000673 | 0         | 0.0000139 | 0         | 0.000264 | 0        | 0.00101 | 0        | 0.01138 | 0         | 0   | 0    | 0.43 | 0    | 0   | 0     | 0   | 0 |
| 15D10247                    | 8.4 %    | 295.5 | 0        | 0.018 | 35       | 0.1869 | 0        | 1.493 | 3         | 0.000673 | 0         | 0.0000139 | 0         | 0.000264 | 0        | 0.00101 | 0        | 0.01138 | 0         | 0   | 0    | 0.43 | 0    | 0   | 0     | 0   | 0 |
| 15D10248                    | 9.4 %    | 295.5 | 0        | 0.018 | 35       | 0.1869 | 0        | 1.493 | 3         | 0.000673 | 0         | 0.0000139 | 0         | 0.000264 | 0        | 0.00101 | 0        | 0.01138 | 0         | 0   | 0    | 0.43 | 0    | 0   | 0     | 0   | 0 |
| 15D10250                    | 10.5 %   | 295.5 | 0        | 0.018 | 35       | 0.1869 | 0        | 1.493 | 3         | 0.000673 | 0         | 0.0000139 | 0         | 0.000264 | 0        | 0.00101 | 0        | 0.01138 | 0         | 0   | 0    | 0.43 | 0    | 0   | 0     | 0   | 0 |
| 15D10251                    | 11.7 %   | 295.5 | 0        | 0.018 | 35       | 0.1869 | 0        | 1.493 | 3         | 0.000673 | 0         | 0.0000139 | 0         | 0.000264 | 0        | 0.00101 | 0        | 0.01138 | 0         | 0   | 0    | 0.43 | 0    | 0   | 0     | 0   | 0 |
| 15D10252                    | 13.1 %   | 295.5 | 0        | 0.018 | 35       | 0.1869 | 0        | 1.493 | 3         | 0.000673 | 0         | 0.0000139 | 0         | 0.000264 | 0        | 0.00101 | 0        | 0.01138 | 0         | 0   | 0    | 0.43 | 0    | 0   | 0     | 0   | 0 |
| 15D10254                    | 14.7 %   | 295.5 | 0        | 0.018 | 35       | 0.1869 | 0        | 1.493 | 3         | 0.000673 | 0         | 0.0000139 | 0         | 0.000264 | 0        | 0.00101 | 0        | 0.01138 | 0         | 0   | 0    | 0.43 | 0    | 0   | 0     | 0   | 0 |
| 15D10255                    | 16.5 %   | 295.5 | 0        | 0.018 | 35       | 0.1869 | 0        | 1.493 | 3         | 0.000673 | 0         | 0.0000139 | 0         | 0.000264 | 0        | 0.00101 | 0        | 0.01138 | 0         | 0   | 0    | 0.43 | 0    | 0   | 0     | 0   | 0 |
| 15D10256                    | 18.5 %   | 295.5 | 0        | 0.018 | 35       | 0.1869 | 0        | 1.493 | 3         | 0.000673 | 0         | 0.0000139 | 0         | 0.000264 | 0        | 0.00101 | 0        | 0.01138 | 0         | 0   | 0    | 0.43 | 0    | 0   | 0     | 0   | 0 |
| 15D10258                    | 19.8 %   | 295.5 | 0        | 0.018 | 35       | 0.1869 | 0        | 1.493 | 3         | 0.000673 | 0         | 0.0000139 | 0         | 0.000264 | 0        | 0.00101 | 0        | 0.01138 | 0         | 0   | 0    | 0.43 | 0    | 0   | 0     | 0   | 0 |
| 15D10259                    | 21.7 %   | 295.5 | 0        | 0.018 | 35       | 0.1869 | 0        | 1.493 | 3         | 0.000673 | 0         | 0.0000139 | 0         | 0.000264 | 0        | 0.00101 | 0        | 0.01138 | 0         | 0   | 0    | 0.43 | 0    | 0   | 0     | 0   | 0 |
| 15D10260                    | 22.8 %   | 295.5 | 0        | 0.018 | 35       | 0.1869 | 0        | 1.493 | 3         | 0.000673 | 0         | 0.0000139 | 0         | 0.000264 | 0        | 0.00101 | 0        | 0.01138 | 0         | 0   | 0    | 0.43 | 0    | 0   | 0     | 0   | 0 |
| 15D10262                    | 24.3 %   | 295.5 | 0        | 0.018 | 35       | 0.1869 | 0        | 1.493 | 3         | 0.000673 | 0         | 0.0000139 | 0         | 0.000264 | 0        | 0.00101 | 0        | 0.01138 | 0         | 0   | 0    | 0.43 | 0    | 0   | 0     | 0   | 0 |



15D10221.AGE >>> 1180256-1 >>> KERGUELEN | FALLOON (14-PIL-01) PROJECT

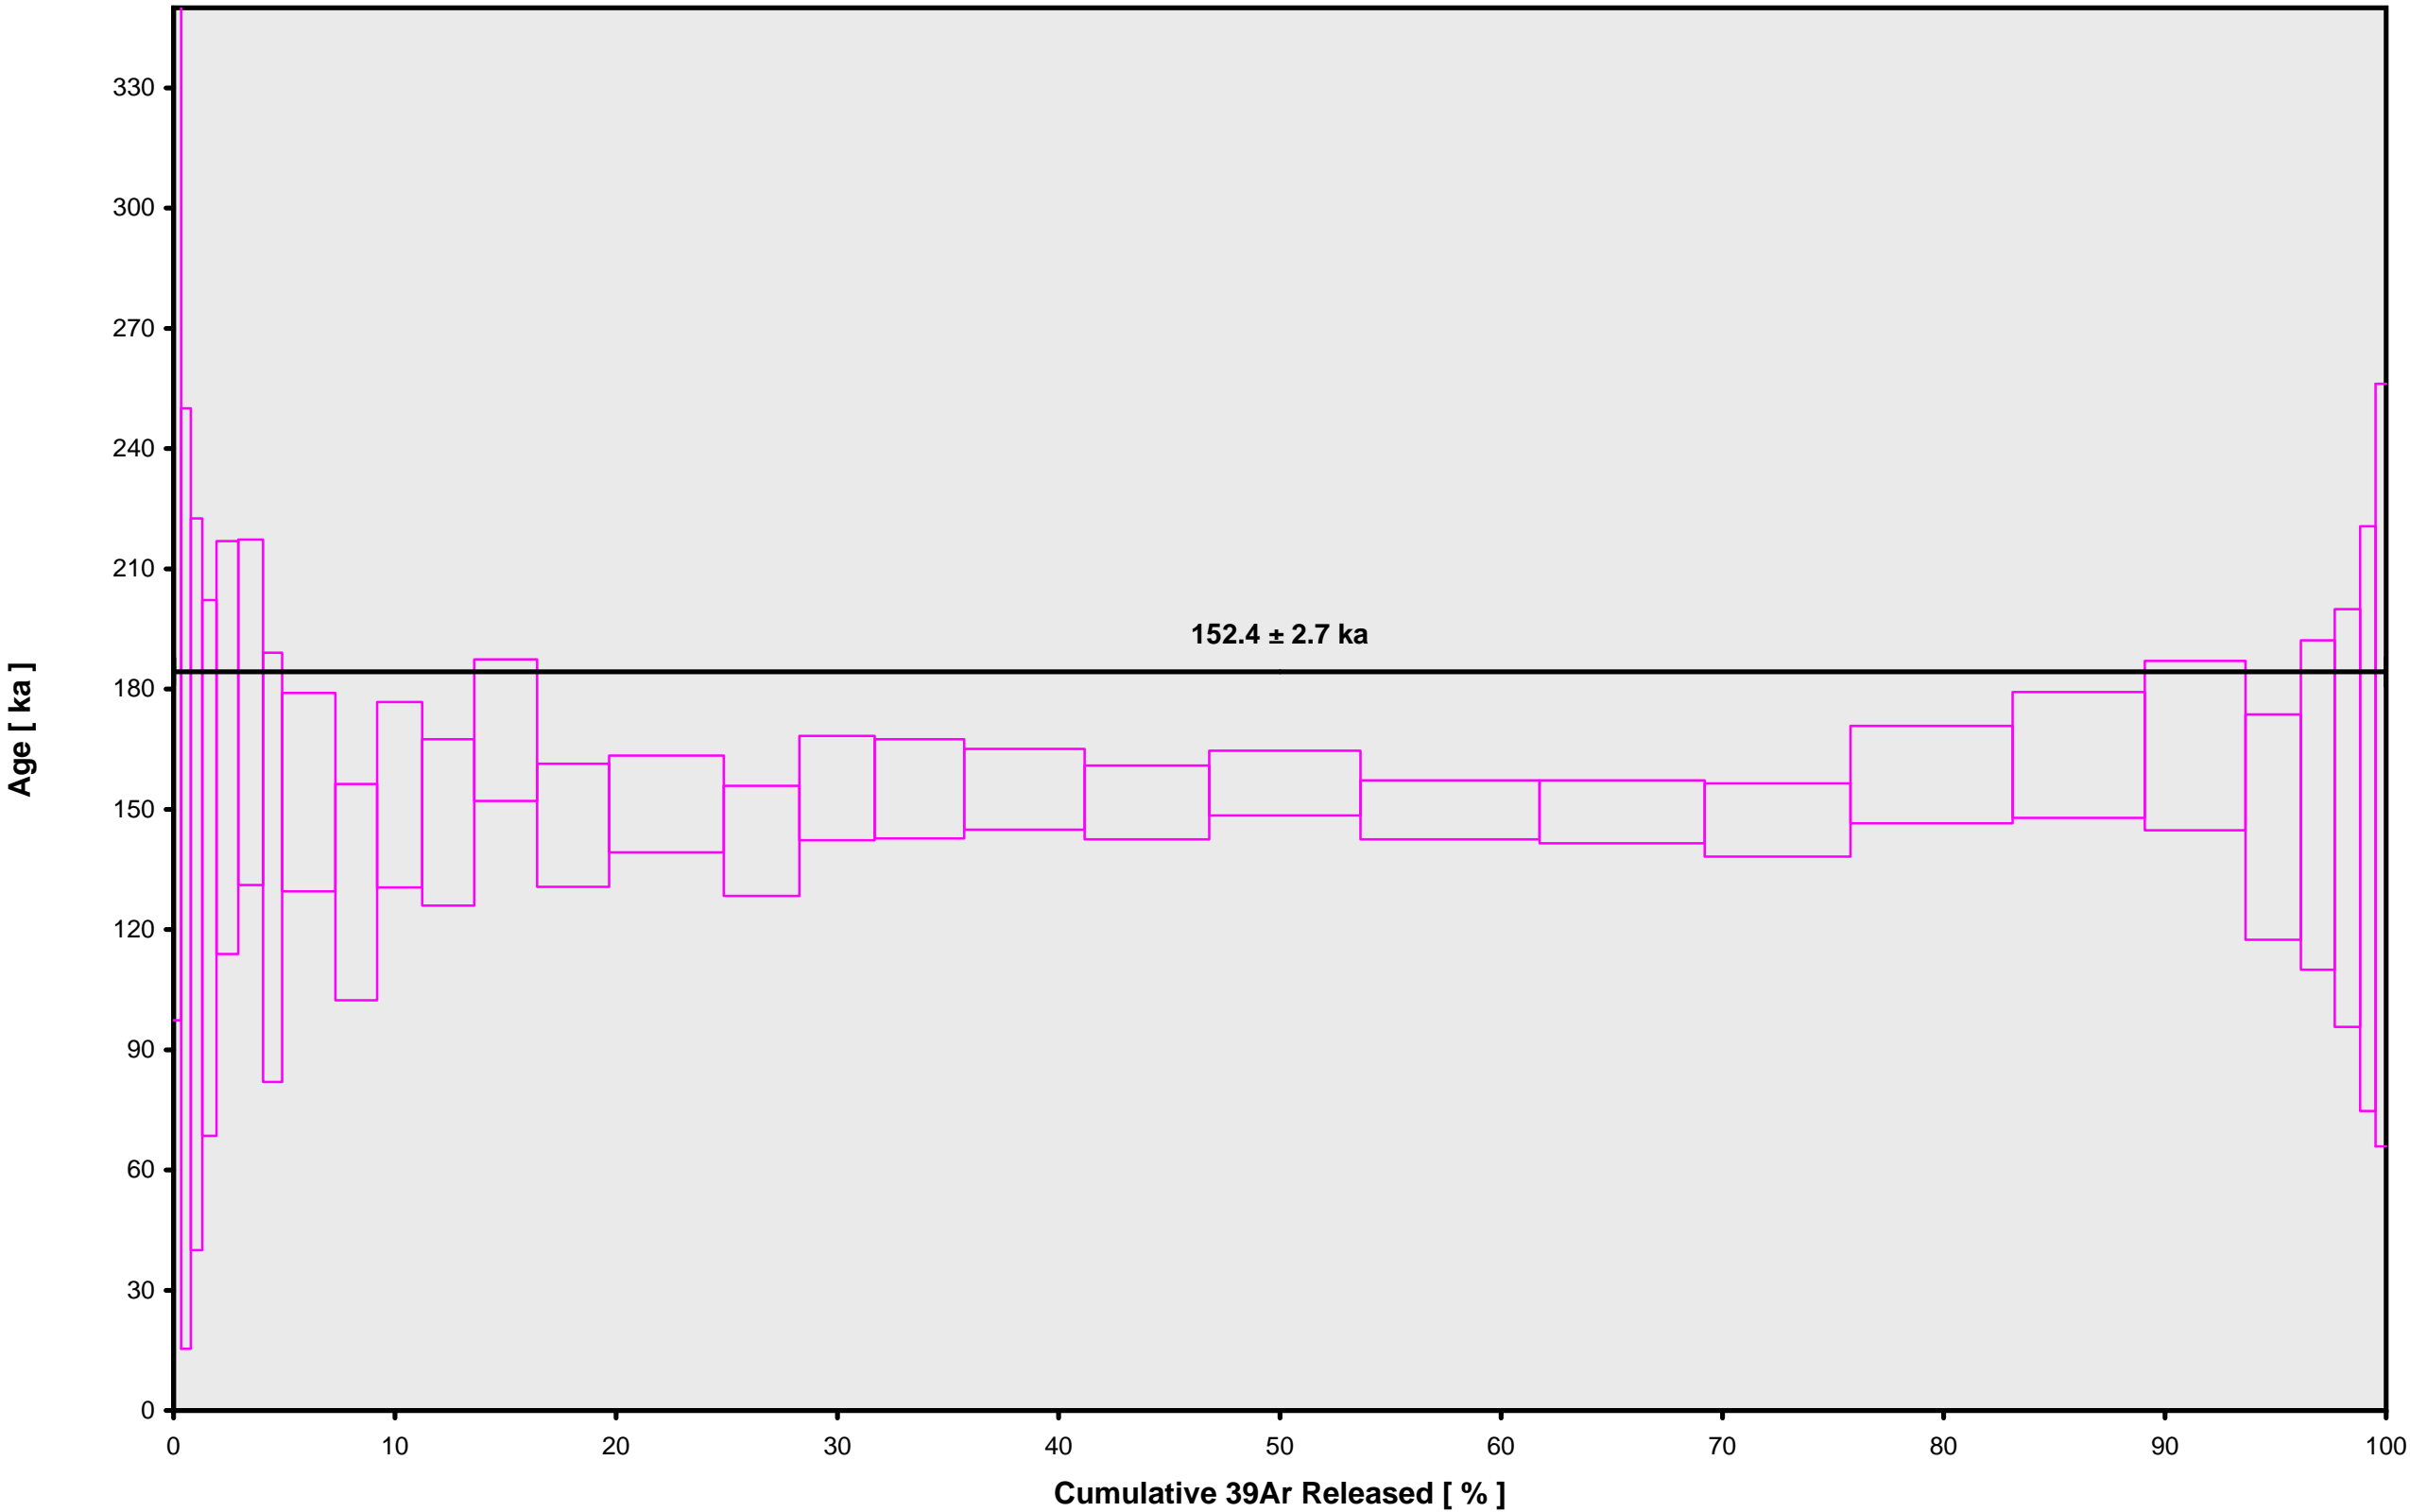

Ar-Ages in ka

WEIGHTED PLATEAU

$152.4 \pm 2.7$

TOTAL FUSION

$153.4 \pm 3.3$

NORMAL ISOCHRON

$150.2 \pm 4.5$

INVERSE ISOCHRON

$150.3 \pm 4.5$

MSWD (PROBABILITY)

0.77 (81%)

Sample Info

Groundmass

Kerguelen Plateau

Dan Miggins

IRR = 14-OSU-07 (7B27-14)

J =  $0.00174661 \pm 0.00000199$



15D10221.AGE >>> 1180256-1 >>> KERGUELEN | FALLOON (14-PIL-01) PROJECT

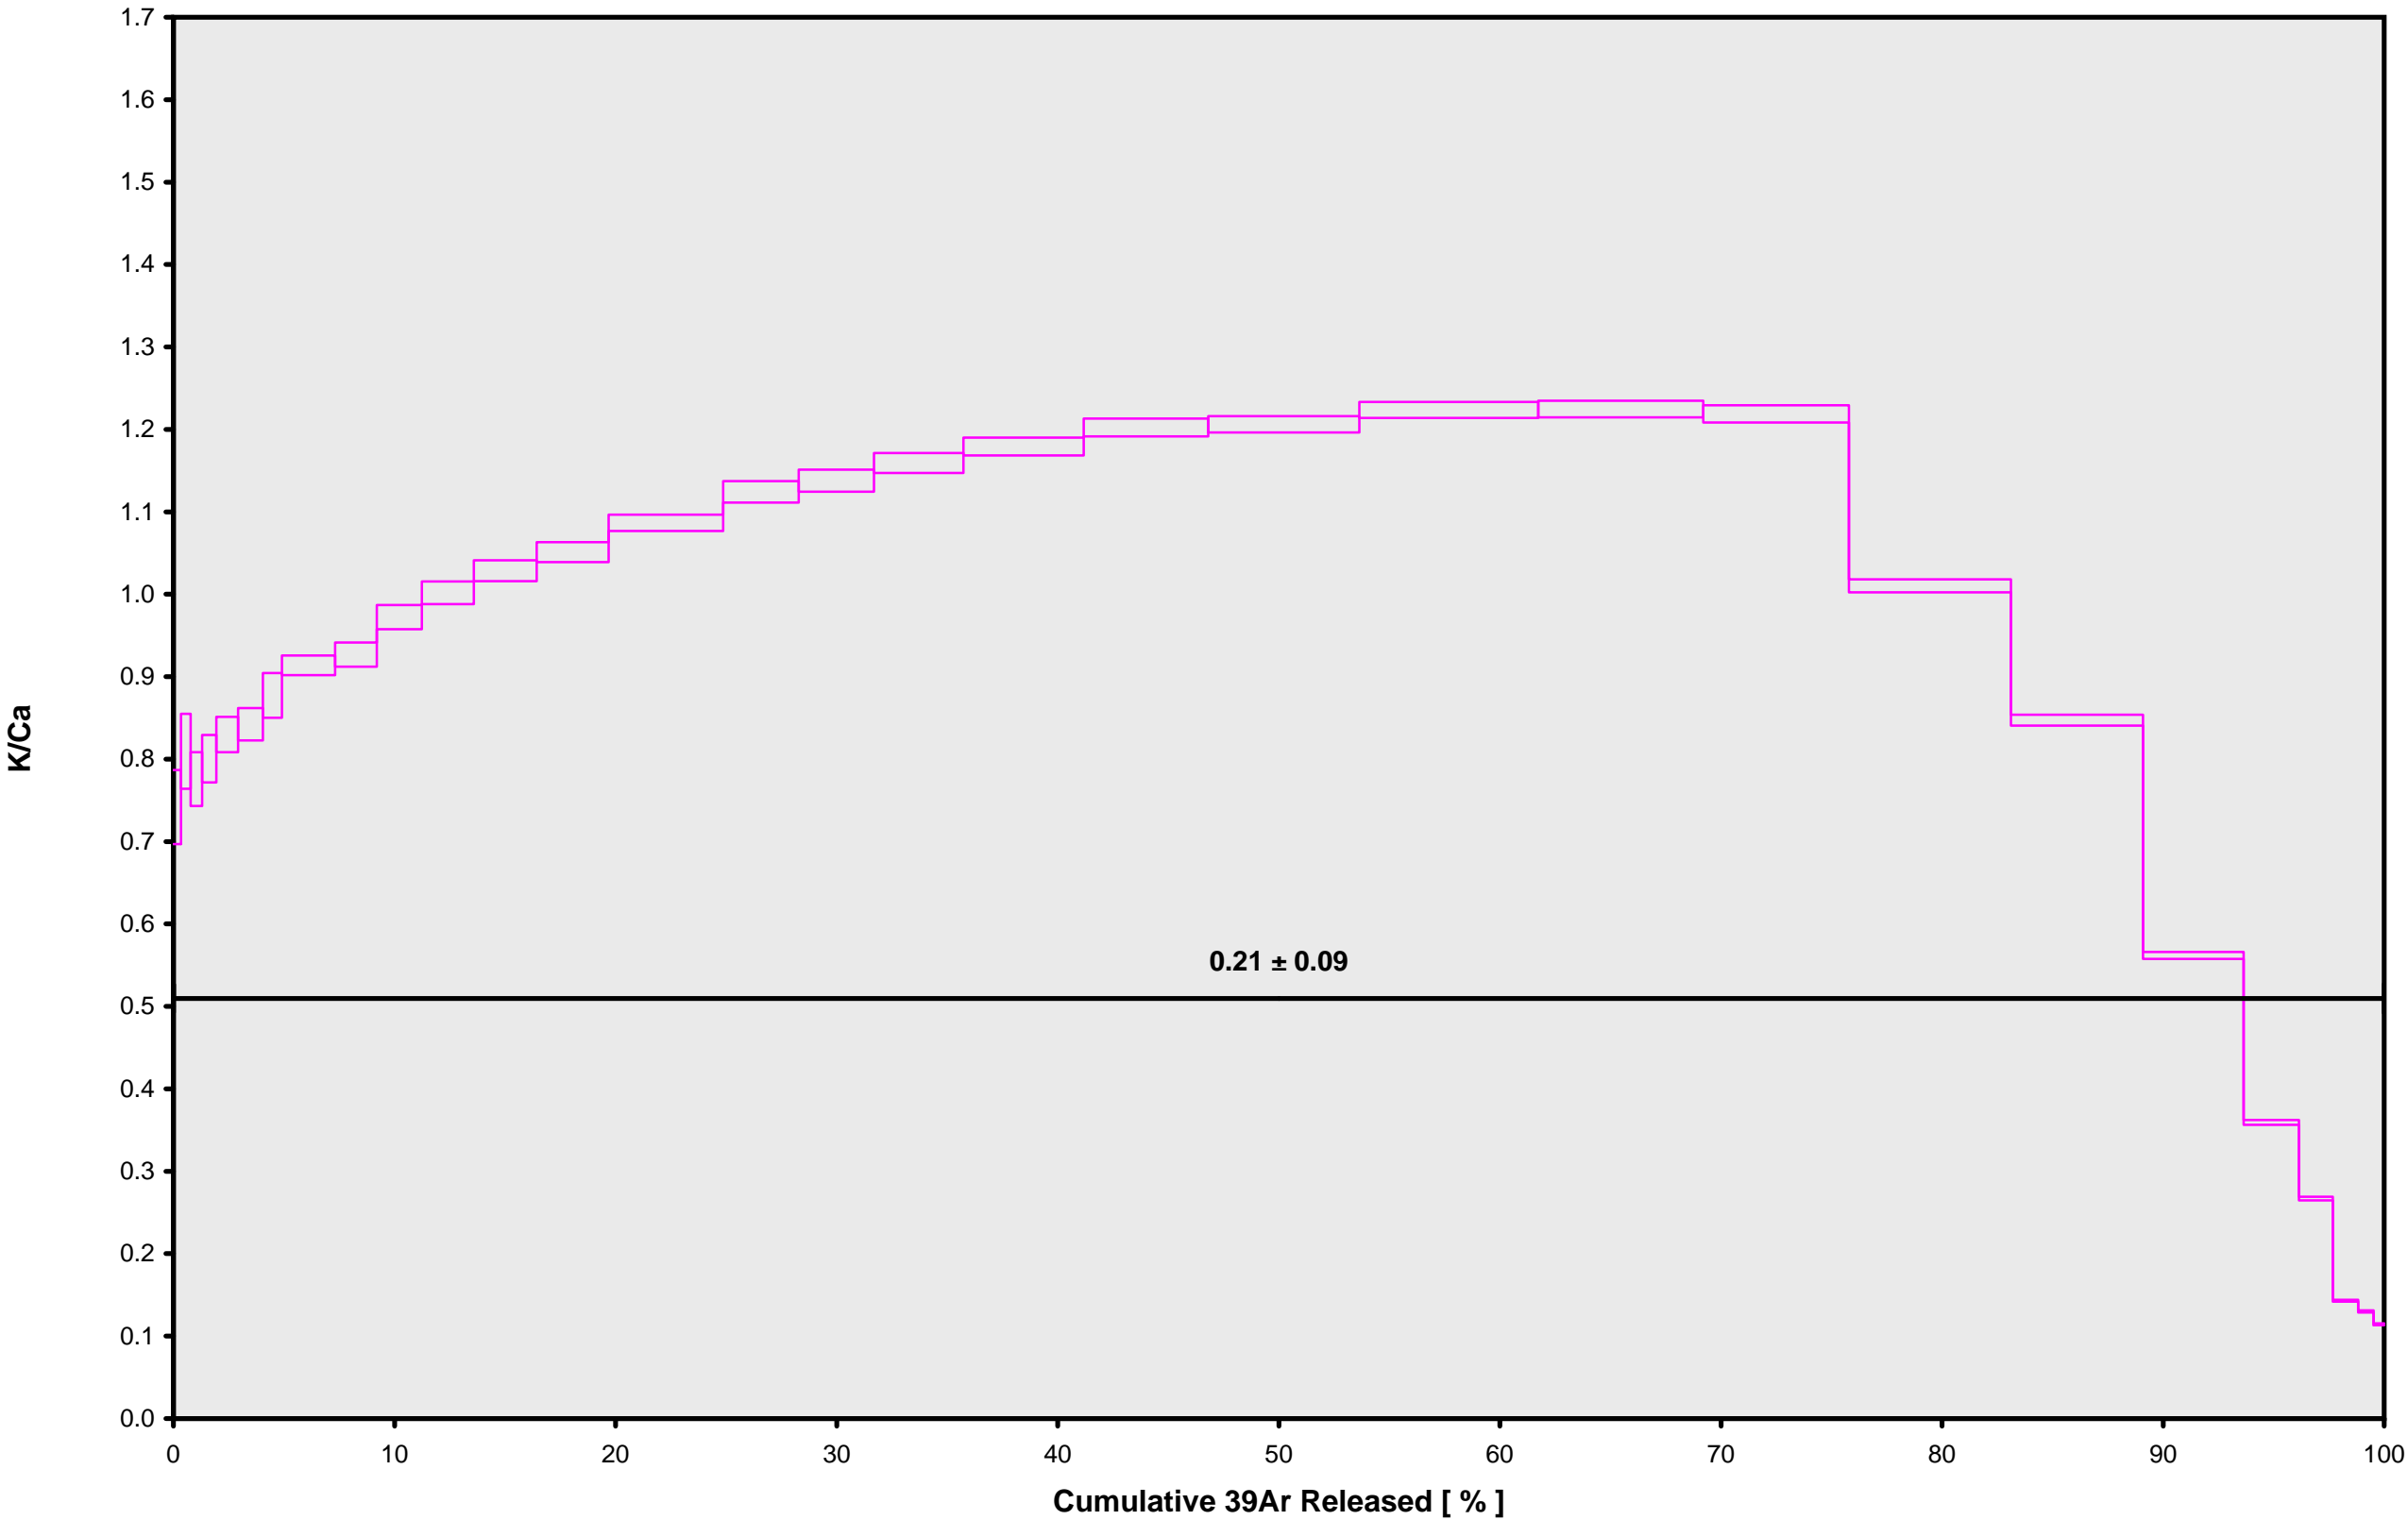

Ar-Ages in ka

WEIGHTED PLATEAU

152.4 ± 2.7

TOTAL FUSION

153.4 ± 3.3

NORMAL ISOCHRON

150.2 ± 4.5

INVERSE ISOCHRON

150.3 ± 4.5

Sample Info

Groundmass

Kerguelen Plateau

Dan Miggins

IRR = 14-OSU-07 (7B27-14)

J = 0.00174661 ± 0.00000199



15D10221.AGE >>> 1180256-1 >>> KERGUELEN | FALLOON (14-PIL-01) PROJECT

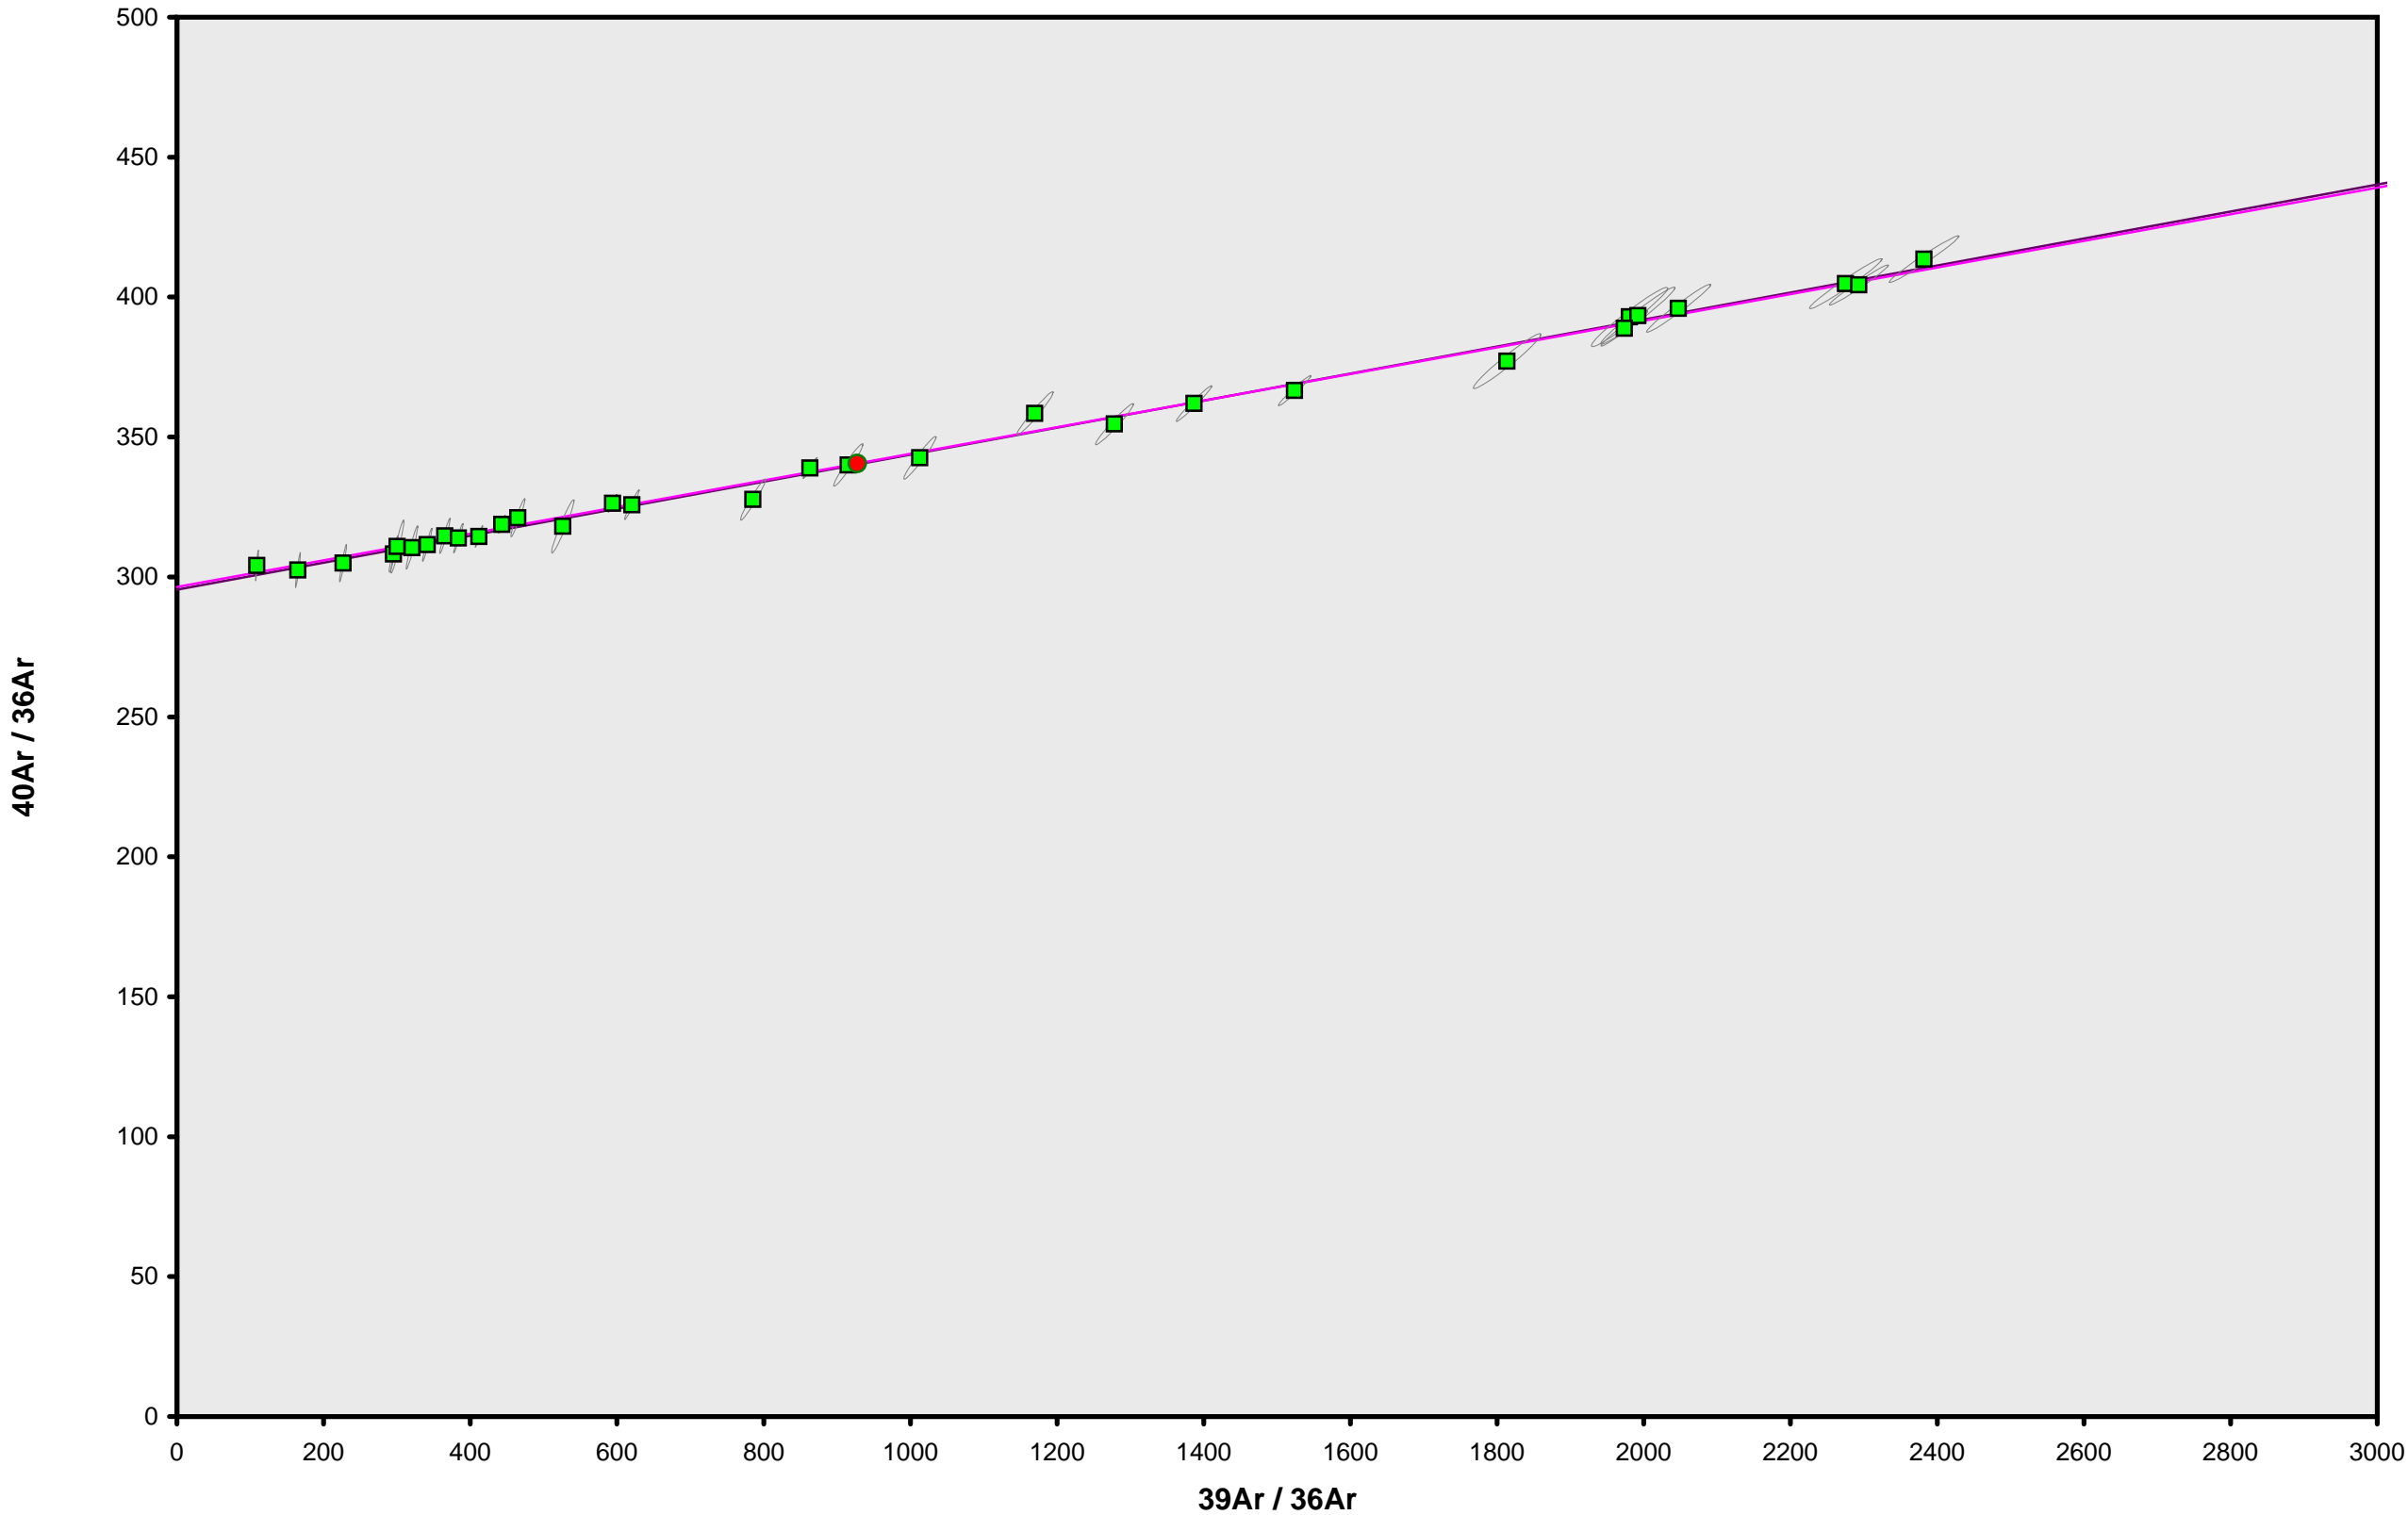

Ar-Ages in ka

WEIGHTED PLATEAU

152.4 ± 2.7

TOTAL FUSION

153.4 ± 3.3

NORMAL ISOCHRON

150.2 ± 4.5

INVERSE ISOCHRON

150.3 ± 4.5

MSWD (PROBABILITY)

0.75 (83%)

40AR/36AR INTERCEPT

296.4 ± 1.6

Sample Info

Groundmass

Kerguelen Plateau

Dan Miggins

IRR = 14-OSU-07 (7B27-14)

J = 0.00174661 ± 0.00000199



15D10221.AGE >>> 1180256-1 >>> KERGUELEN | FALLOON (14-PIL-01) PROJECT

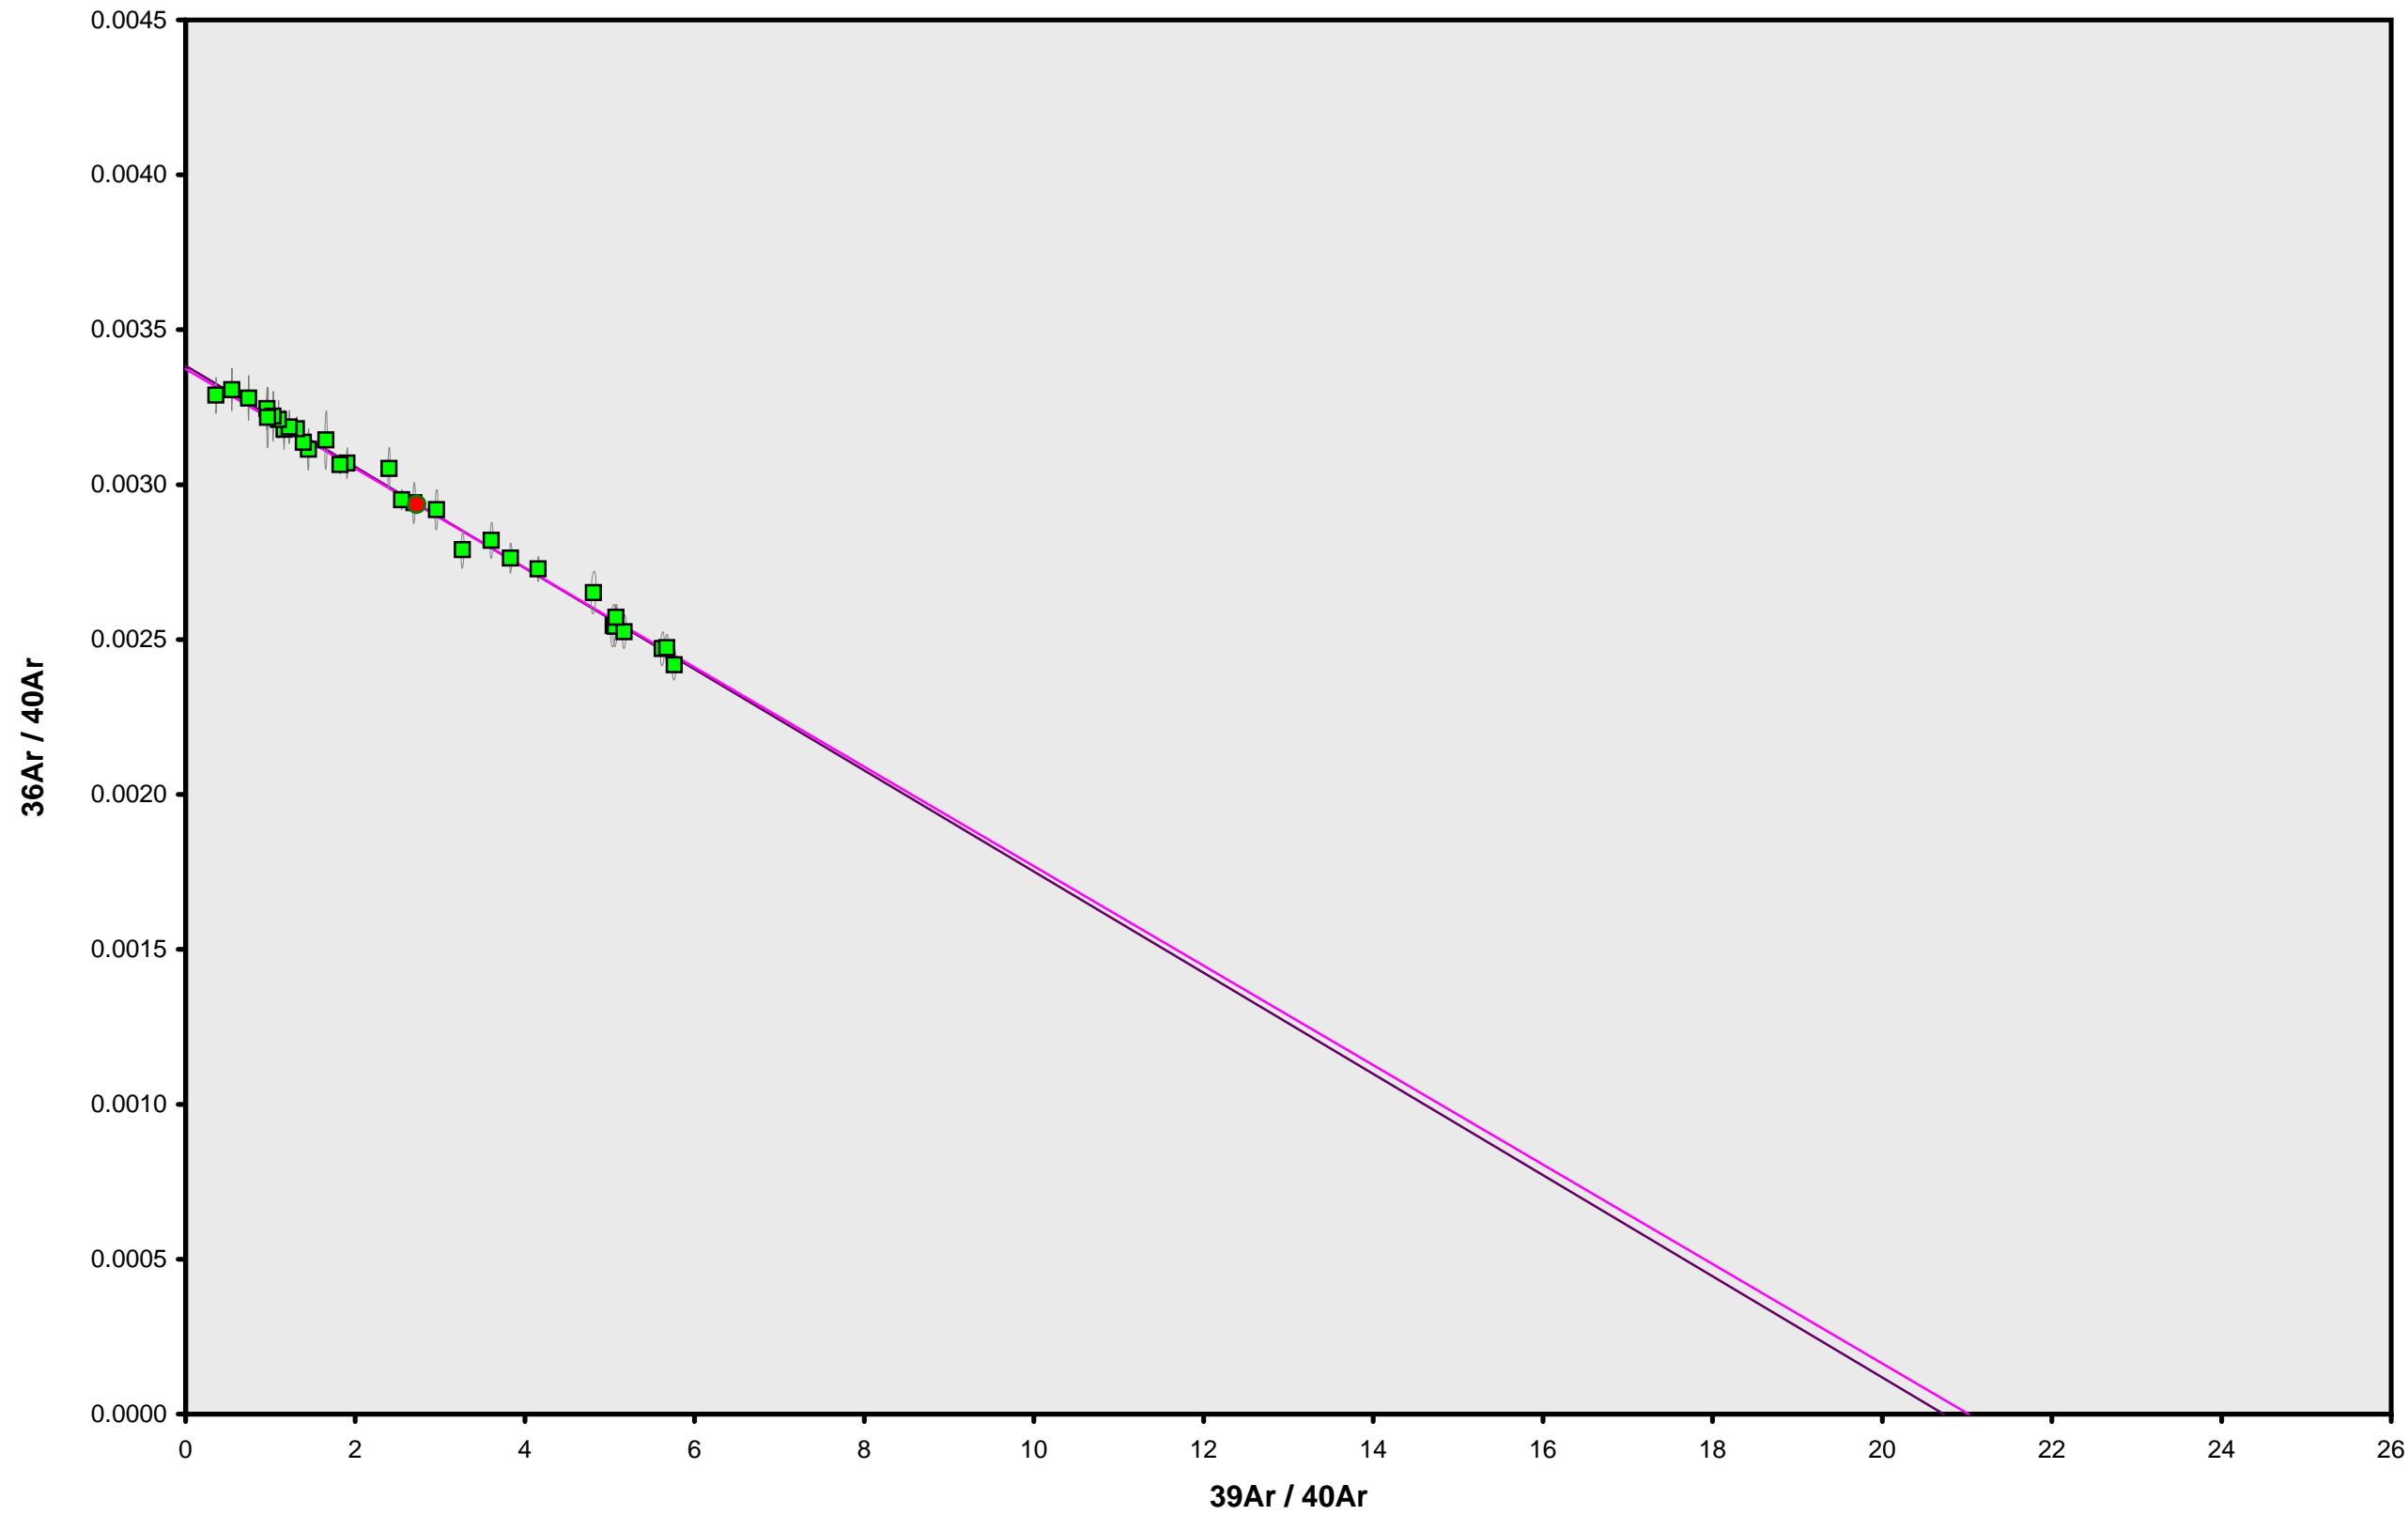

**Ar-Ages in ka**

**WEIGHTED PLATEAU**  
152.4 ± 2.7

**TOTAL FUSION**  
153.4 ± 3.3

**NORMAL ISOCHRON**  
150.2 ± 4.5

**INVERSE ISOCHRON**  
150.3 ± 4.5

**MSWD (PROBABILITY)**  
0.75 (83%)

**SPREADING FACTOR**  
25.7%

**40AR/36AR INTERCEPT**  
296.4 ± 1.6

**Sample Info**

Groundmass  
Kerguelen Plateau  
Dan Miggins

IRR = 14-OSU-07 (7B27-14)  
J = 0.00174661 ± 0.00000199



| Incremental Heating |        | 36Ar(a)<br>[fA] | 37Ar(ca)<br>[fA] | 38Ar(cl)<br>[fA] | 39Ar(k)<br>[fA] | 40Ar(r)<br>[fA] | Age ± 2σ<br>(ka) | 40Ar(r)<br>(%) | 39Ar(k)<br>(%) | K/Ca ± 2σ   |
|---------------------|--------|-----------------|------------------|------------------|-----------------|-----------------|------------------|----------------|----------------|-------------|
| 15D10130            | 2.0 %  | 0.1761959       | 27.8154          | 0.765978         | 53.1089         | 6.03360         | 368.3 ± 44.5     | 10.38          | 1.05           | 0.82 ± 0.02 |
| 15D10132            | 2.2 %  | 0.1319569       | 27.2343          | 0.597179         | 52.2171         | 5.51425         | 342.4 ± 44.1     | 12.37          | 1.03           | 0.82 ± 0.02 |
| 15D10133            | 2.4 %  | 0.1279854       | 34.0590          | 0.563025         | 65.0019         | 6.62305         | 330.3 ± 37.0     | 14.88          | 1.29           | 0.82 ± 0.01 |
| 15D10134            | 2.6 %  | 0.1112429       | 37.0304          | 0.452721         | 72.9579         | 7.52957         | 334.6 ± 31.0     | 18.60          | 1.44           | 0.85 ± 0.01 |
| 15D10136            | 2.8 %  | 0.0946614       | 43.4490          | 0.418201         | 82.3935         | 8.81827         | 347.0 ± 24.0     | 23.91          | 1.63           | 0.82 ± 0.01 |
| 15D10137            | 3.0 %  | 0.1217945       | 63.1786          | 0.436463         | 119.3314        | 11.17389        | 303.6 ± 19.6     | 23.63          | 2.36           | 0.81 ± 0.01 |
| 15D10138            | 3.3 %  | 0.0862471       | 59.4244          | 0.329955         | 109.3623        | 10.76491        | 319.1 ± 18.6     | 29.61          | 2.16           | 0.79 ± 0.01 |
| 15D10139            | 3.6 %  | 0.0944640       | 82.8794          | 0.293551         | 147.7701        | 14.25608        | 312.8 ± 13.6     | 33.69          | 2.92           | 0.77 ± 0.01 |
| 15D10141            | 3.9 %  | 0.1639117       | 182.4110         | 0.516825         | 315.7758        | 32.85112        | 337.3 ± 8.3      | 40.26          | 6.25           | 0.74 ± 0.01 |
| 15D10142            | 4.3 %  | ✓ 0.1614608     | 244.6292         | 0.579666         | 425.7729        | 42.81937        | 326.0 ± 6.3      | 47.07          | 8.42           | 0.75 ± 0.01 |
| 15D10143            | 4.6 %  | ✓ 0.0866528     | 147.2330         | 0.278754         | 268.8843        | 26.53084        | 319.9 ± 8.3      | 50.62          | 5.32           | 0.79 ± 0.01 |
| 15D10144            | 4.9 %  | ✓ 0.1220443     | 191.2915         | 0.398926         | 387.5543        | 37.99828        | 317.9 ± 6.1      | 51.04          | 7.67           | 0.87 ± 0.01 |
| 15D10146            | 5.2 %  | ✓ 0.0889562     | 132.9944         | 0.344276         | 300.2064        | 29.66672        | 320.4 ± 7.6      | 52.73          | 5.94           | 0.97 ± 0.01 |
| 15D10147            | 5.5 %  | ✓ 0.0940551     | 125.2590         | 0.335063         | 306.8597        | 29.73549        | 314.2 ± 7.1      | 51.41          | 6.07           | 1.05 ± 0.01 |
| 15D10148            | 5.8 %  | ✓ 0.0880208     | 108.1652         | 0.395741         | 282.2714        | 27.59206        | 316.9 ± 7.9      | 51.20          | 5.58           | 1.12 ± 0.01 |
| 15D10150            | 6.1 %  | ✓ 0.0776075     | 89.2739          | 0.324683         | 244.1870        | 24.27074        | 322.2 ± 8.3      | 51.15          | 4.83           | 1.18 ± 0.01 |
| 15D10151            | 6.5 %  | ✓ 0.0617723     | 63.4247          | 0.222627         | 180.2892        | 17.27757        | 310.7 ± 9.7      | 48.38          | 3.57           | 1.22 ± 0.01 |
| 15D10152            | 7.0 %  | ✓ 0.0720188     | 69.6751          | 0.336674         | 197.3211        | 19.27774        | 316.7 ± 9.7      | 47.30          | 3.90           | 1.22 ± 0.01 |
| 15D10154            | 7.6 %  | ✓ 0.0926648     | 78.4274          | 0.423145         | 227.2011        | 22.12957        | 315.8 ± 9.2      | 44.49          | 4.49           | 1.25 ± 0.01 |
| 15D10155            | 8.4 %  | ✓ 0.0988338     | 74.3706          | 0.457709         | 215.1492        | 20.79973        | 313.4 ± 10.0     | 41.42          | 4.26           | 1.24 ± 0.01 |
| 15D10156            | 9.4 %  | ✓ 0.1407565     | 89.7757          | 0.789514         | 251.6502        | 24.61043        | 317.1 ± 10.0     | 37.03          | 4.98           | 1.21 ± 0.01 |
| 15D10158            | 10.5 % | ✓ 0.1502562     | 80.1510          | 0.692542         | 213.8261        | 20.97261        | 318.0 ± 11.4     | 31.98          | 4.23           | 1.15 ± 0.01 |
| 15D10159            | 11.7 % | ✓ 0.1469956     | 67.8771          | 0.615441         | 163.0474        | 15.39542        | 306.1 ± 14.2     | 26.10          | 3.23           | 1.03 ± 0.01 |
| 15D10160            | 13.1 % | ✓ 0.1343548     | 51.5899          | 0.485205         | 120.2347        | 11.84340        | 319.3 ± 19.9     | 22.92          | 2.38           | 1.00 ± 0.01 |
| 15D10162            | 14.7 % | 0.1528802       | 68.2749          | 0.411288         | 102.9130        | 9.30368         | 293.1 ± 23.2     | 17.04          | 2.04           | 0.65 ± 0.01 |
| 15D10163            | 16.5 % | 0.0898396       | 57.5130          | 0.184857         | 47.6972         | 4.02774         | 273.8 ± 40.9     | 13.15          | 0.94           | 0.36 ± 0.00 |
| 15D10164            | 18.5 % | 0.0666414       | 72.6334          | 0.208063         | 34.9481         | 2.56989         | 238.4 ± 56.0     | 11.53          | 0.69           | 0.21 ± 0.00 |
| 15D10166            | 19.8 % | 0.0555957       | 54.3202          | 0.115692         | 23.2909         | 2.06568         | 287.5 ± 83.0     | 11.16          | 0.46           | 0.18 ± 0.00 |
| 15D10167            | 21.7 % | 0.0469402       | 74.0937          | 0.177037         | 19.3897         | 1.74725         | 292.1 ± 88.8     | 11.17          | 0.38           | 0.11 ± 0.00 |
| 15D10168            | 22.8 % | 0.0382137       | 57.7429          | 0.140314         | 14.1162         | 1.53275         | 352.0 ± 114.9    | 11.94          | 0.28           | 0.11 ± 0.00 |
| 15D10170            | 24.3 % | 0.0365397       | 44.7614          | 0.134061         | 10.4989         | 0.98202         | 303.2 ± 162.7    | 8.33           | 0.21           | 0.10 ± 0.00 |
| Σ                   |        | 3.2115607       | 2600.9590        | 12.425173        | 5055.2282       | 496.71373       |                  |                |                |             |

| Information on Analysis                                                                                                                                                                                                                                                     | Results          | 40(r)/39(k) ± 2σ          | Age ± 2σ<br>(ka)    | MSWD                       | 39Ar(k)<br>(%,n)                                       | K/Ca ± 2σ   |
|-----------------------------------------------------------------------------------------------------------------------------------------------------------------------------------------------------------------------------------------------------------------------------|------------------|---------------------------|---------------------|----------------------------|--------------------------------------------------------|-------------|
| Sample = 253-14<br>Material = Groundmass<br>Location = Kerguelen Plateau<br>Analyst = Dan Miggins<br>Project = KERGUELEN   FALLOON (14-I<br>Mass Discrimination Law = LIN<br>Irradiation = 14-OSU-07 (7B20-14)<br>J = 0.00179298 ± 0.00000210<br>FCT-NM = 28.201 ± 0.023 Ma | Age Plateau      | 0.09810 ± 0.00073 ± 0.74% | 318.0 ± 2.5 ± 0.78% | 1.12 34%<br>1.76<br>1.0564 | 74.86 15<br>2σ Confidence Limit<br>Error Magnification | 0.97 ± 0.09 |
|                                                                                                                                                                                                                                                                             | Total Fusion Age | 0.09826 ± 0.00074 ± 0.76% | 318.5 ± 2.5 ± 0.79% |                            | 31                                                     | 0.84 ± 0.00 |



| Normal Isochron |        | 39(k)/36(a) ± 2σ |  | 40(a+r)/36(a) ± 2σ | r.i.   |
|-----------------|--------|------------------|--|--------------------|--------|
| 15D10130        | 2.0 %  | 301.42 ± 4.17    |  | 329.74 ± 4.59      | 0.9726 |
| 15D10132        | 2.2 %  | 395.71 ± 7.09    |  | 337.29 ± 6.11      | 0.9768 |
| 15D10133        | 2.4 %  | 507.89 ± 9.81    |  | 347.25 ± 6.78      | 0.9807 |
| 15D10134        | 2.6 %  | 655.84 ± 13.65   |  | 363.19 ± 7.65      | 0.9809 |
| 15D10136        | 2.8 %  | 870.40 ± 18.44   |  | 388.66 ± 8.36      | 0.9791 |
| 15D10137        | 3.0 %  | 979.78 ± 19.25   |  | 387.24 ± 7.69      | 0.9839 |
| 15D10138        | 3.3 %  | 1268.01 ± 30.37  |  | 420.31 ± 10.20     | 0.9833 |
| 15D10139        | 3.6 %  | 1564.30 ± 33.91  |  | 446.42 ± 9.78      | 0.9849 |
| 15D10141        | 3.9 %  | 1926.50 ± 31.76  |  | 495.92 ± 8.20      | 0.9900 |
| 15D10142        | 4.3 %  | 2637.00 ± 45.04  |  | 560.70 ± 9.59      | 0.9920 |
| 15D10143        | 4.6 %  | 3103.01 ± 81.79  |  | 601.67 ± 15.94     | 0.9926 |
| 15D10144        | 4.9 %  | 3175.52 ± 63.22  |  | 606.85 ± 12.12     | 0.9925 |
| 15D10146        | 5.2 %  | 3374.77 ± 88.30  |  | 629.00 ± 16.52     | 0.9935 |
| 15D10147        | 5.5 %  | 3262.55 ± 77.29  |  | 611.65 ± 14.56     | 0.9923 |
| 15D10148        | 5.8 %  | 3206.87 ± 82.41  |  | 608.97 ± 15.72     | 0.9928 |
| 15D10150        | 6.1 %  | 3146.44 ± 82.94  |  | 608.24 ± 16.13     | 0.9915 |
| 15D10151        | 6.5 %  | 2918.61 ± 83.22  |  | 575.20 ± 16.56     | 0.9880 |
| 15D10152        | 7.0 %  | 2739.85 ± 73.51  |  | 563.18 ± 15.24     | 0.9891 |
| 15D10154        | 7.6 %  | 2451.86 ± 56.45  |  | 534.31 ± 12.38     | 0.9898 |
| 15D10155        | 8.4 %  | 2176.88 ± 48.02  |  | 505.95 ± 11.24     | 0.9890 |
| 15D10156        | 9.4 %  | 1787.84 ± 32.64  |  | 470.34 ± 8.63      | 0.9895 |
| 15D10158        | 10.5 % | 1423.08 ± 23.74  |  | 435.08 ± 7.31      | 0.9867 |
| 15D10159        | 11.7 % | 1109.20 ± 17.92  |  | 400.23 ± 6.52      | 0.9839 |
| 15D10160        | 13.1 % | 894.90 ± 16.34   |  | 383.65 ± 7.07      | 0.9840 |
| 15D10162        | 14.7 % | 673.16 ± 10.77   |  | 356.36 ± 5.76      | 0.9803 |
| 15D10163        | 16.5 % | 530.91 ± 11.70   |  | 340.33 ± 7.65      | 0.9712 |
| 15D10164        | 18.5 % | 524.42 ± 15.64   |  | 334.06 ± 10.17     | 0.9722 |
| 15D10166        | 19.8 % | 418.93 ± 14.79   |  | 332.66 ± 11.99     | 0.9698 |
| 15D10167        | 21.7 % | 413.07 ± 15.28   |  | 332.72 ± 12.63     | 0.9614 |
| 15D10168        | 22.8 % | 369.40 ± 15.76   |  | 335.61 ± 14.72     | 0.9583 |
| 15D10170        | 24.3 % | 287.33 ± 13.61   |  | 322.38 ± 15.63     | 0.9547 |

| Results         | 40(a)/36(a) ± 2σ      |        | 40(r)/39(k) ± 2σ          | Age ± 2σ (ka)       | MSWD |
|-----------------|-----------------------|--------|---------------------------|---------------------|------|
| Normal Isochron | 293.43 ± 4.90 ± 1.67% |        | 0.09886 ± 0.00204 ± 2.06% | 320.5 ± 6.7 ± 2.08% | 1.13 |
|                 |                       |        | Full External Error ± 9.8 |                     |      |
|                 |                       |        | Analytical Error ± 6.6    |                     |      |
| Statistics      | 2σ Confidence Limit   | 1.78   | Convergence               | 0.000000671550      |      |
|                 | Error Magnification   | 1.0644 | Number of Iterations      | 8                   |      |
|                 | Number of Data Points | 15     | Calculated Line           | Weighted York-2     |      |



| Inverse Isochron |        | 39(k)/40(a+r) ± 2σ    |  | 36(a)/40(a+r) ± 2σ      | r.i.   |
|------------------|--------|-----------------------|--|-------------------------|--------|
| 15D10130         | 2.0 %  | 0.9141028 ± 0.0029700 |  | 0.00303266 ± 0.00004224 | 0.1471 |
| 15D10132         | 2.2 %  | 1.1732194 ± 0.0045639 |  | 0.00296482 ± 0.00005375 | 0.1594 |
| 15D10133         | 2.4 %  | 1.4625993 ± 0.0055885 |  | 0.00287978 ± 0.00005622 | 0.1535 |
| 15D10134         | 2.6 %  | 1.8058075 ± 0.0074005 |  | 0.00275341 ± 0.00005799 | 0.1593 |
| 15D10136         | 2.8 %  | 2.2395181 ± 0.0097968 |  | 0.00257297 ± 0.00005533 | 0.1750 |
| 15D10137         | 3.0 %  | 2.5301273 ± 0.0089685 |  | 0.00258235 ± 0.00005125 | 0.1461 |
| 15D10138         | 3.3 %  | 3.0168150 ± 0.0133358 |  | 0.00237917 ± 0.00005773 | 0.1609 |
| 15D10139         | 3.6 %  | 3.5041382 ± 0.0133132 |  | 0.00224007 ± 0.00004909 | 0.1485 |
| 15D10141         | 3.9 %  | 3.8847012 ± 0.0090689 |  | 0.00201646 ± 0.00003336 | 0.0950 |
| 15D10142         | 4.3 %  | 4.7030602 ± 0.0101406 |  | 0.00178349 ± 0.00003052 | 0.0782 |
| 15D10143         | 4.6 %  | 5.1572899 ± 0.0165799 |  | 0.00166203 ± 0.00004402 | 0.1001 |
| 15D10144         | 4.9 %  | 5.2328096 ± 0.0128209 |  | 0.00164786 ± 0.00003291 | 0.0868 |
| 15D10146         | 5.2 %  | 5.3653064 ± 0.0160400 |  | 0.00158983 ± 0.00004176 | 0.0909 |
| 15D10147         | 5.5 %  | 5.3340232 ± 0.0157131 |  | 0.00163492 ± 0.00003891 | 0.0984 |
| 15D10148         | 5.8 %  | 5.2660412 ± 0.0163112 |  | 0.00164211 ± 0.00004239 | 0.0976 |
| 15D10150         | 6.1 %  | 5.1730429 ± 0.0178524 |  | 0.00164410 ± 0.00004359 | 0.1101 |
| 15D10151         | 6.5 %  | 5.0740973 ± 0.0225493 |  | 0.00173853 ± 0.00005005 | 0.1389 |
| 15D10152         | 7.0 %  | 4.8650018 ± 0.0194164 |  | 0.00177564 ± 0.00004804 | 0.1296 |
| 15D10154         | 7.6 %  | 4.5888064 ± 0.0151674 |  | 0.00187156 ± 0.00004338 | 0.1185 |
| 15D10155         | 8.4 %  | 4.3025426 ± 0.0141738 |  | 0.00197647 ± 0.00004391 | 0.1226 |
| 15D10156         | 9.4 %  | 3.8011343 ± 0.0100823 |  | 0.00212610 ± 0.00003902 | 0.1066 |
| 15D10158         | 10.5 % | 3.2708461 ± 0.0089451 |  | 0.00229843 ± 0.00003861 | 0.1224 |
| 15D10159         | 11.7 % | 2.7713775 ± 0.0080731 |  | 0.00249854 ± 0.00004072 | 0.1376 |
| 15D10160         | 13.1 % | 2.3326048 ± 0.0076589 |  | 0.00260654 ± 0.00004806 | 0.1421 |
| 15D10162         | 14.7 % | 1.8890125 ± 0.0060433 |  | 0.00280618 ± 0.00004539 | 0.1534 |
| 15D10163         | 16.5 % | 1.5599879 ± 0.0083519 |  | 0.00293830 ± 0.00006603 | 0.2003 |
| 15D10164         | 18.5 % | 1.5698243 ± 0.0111835 |  | 0.00299345 ± 0.00009111 | 0.2033 |
| 15D10166         | 19.8 % | 1.2593638 ± 0.0110727 |  | 0.00300611 ± 0.00010833 | 0.2051 |
| 15D10167         | 21.7 % | 1.2414930 ± 0.0129836 |  | 0.00300550 ± 0.00011413 | 0.2306 |
| 15D10168         | 22.8 % | 1.1006911 ± 0.0138097 |  | 0.00297965 ± 0.00013072 | 0.2375 |
| 15D10170         | 24.3 % | 0.8912878 ± 0.0128920 |  | 0.00310197 ± 0.00015037 | 0.2249 |

| Results          | 40(a)/36(a) ± 2σ          |        | 40(r)/39(k) ± 2σ             | Age ± 2σ<br>(ka)       | MSWD        |
|------------------|---------------------------|--------|------------------------------|------------------------|-------------|
| Inverse Isochron | 293.43 ± 4.92<br>± 1.68%  |        | 0.09890 ± 0.00204<br>± 2.07% | 320.6 ± 6.7<br>± 2.08% | 1.14<br>32% |
|                  | Full External Error ± 9.8 |        |                              |                        |             |
|                  | Analytical Error ± 6.6    |        |                              |                        |             |
| Statistics       | 2σ Confidence Limit       | 1.78   | Convergence                  | 0.0102691859           |             |
|                  | Error Magnification       | 1.0680 | Number of Iterations         | 2                      |             |
|                  | Number of Data Points     | 15     | Calculated Line              | Weighted York-2        |             |
|                  | Spreading Factor          | 30.0%  |                              |                        |             |



| OSU Argon Geochronology Lab |        |             |       |           |       |           |        |           |       |           |       |                   |               |             |             |             |
|-----------------------------|--------|-------------|-------|-----------|-------|-----------|--------|-----------|-------|-----------|-------|-------------------|---------------|-------------|-------------|-------------|
| Relative Abundances         |        | 36Ar [fA]   | %1σ   | 37Ar [fA] | %1σ   | 38Ar [fA] | %1σ    | 39Ar [fA] | %1σ   | 40Ar [fA] | %1σ   | 40(r)/39(k) ± 2σ  | Age ± 2σ (ka) | 40Ar(r) (%) | 39Ar(k) (%) | K/Ca ± 2σ   |
| 15D10130                    | 2.0 %  | 0.1836523   | 0.655 | 27.8154   | 0.992 | 1.403675  | 2.842  | 53.1276   | 0.099 | 58.1531   | 0.129 | 0.11361 ± 0.01371 | 368.3 ± 44.5  | 10.38       | 1.05        | 0.82 ± 0.02 |
| 15D10132                    | 2.2 %  | 0.1392350   | 0.843 | 27.2343   | 1.034 | 1.216451  | 3.067  | 52.2354   | 0.099 | 44.5603   | 0.167 | 0.10560 ± 0.01361 | 342.4 ± 44.1  | 12.37       | 1.03        | 0.82 ± 0.02 |
| 15D10133                    | 2.4 %  | 0.1370602   | 0.896 | 34.0590   | 0.812 | 1.327141  | 3.052  | 65.0248   | 0.089 | 44.5084   | 0.169 | 0.10189 ± 0.01143 | 330.3 ± 37.0  | 14.88       | 1.29        | 0.82 ± 0.01 |
| 15D10134                    | 2.6 %  | 0.1210858   | 0.950 | 37.0304   | 0.792 | 1.304288  | 2.920  | 72.9829   | 0.087 | 40.4755   | 0.185 | 0.10320 ± 0.00957 | 334.6 ± 31.0  | 18.60       | 1.44        | 0.85 ± 0.01 |
| 15D10136                    | 2.8 %  | 0.1061937   | 0.938 | 43.4490   | 0.675 | 1.374135  | 2.956  | 82.4227   | 0.082 | 36.8739   | 0.202 | 0.10703 ± 0.00740 | 347.0 ± 24.0  | 23.91       | 1.63        | 0.82 ± 0.01 |
| 15D10137                    | 3.0 %  | 0.1385382   | 0.859 | 63.1786   | 0.522 | 1.818096  | 2.084  | 119.3739  | 0.076 | 47.2847   | 0.160 | 0.09364 ± 0.00604 | 303.6 ± 19.6  | 23.63       | 2.36        | 0.81 ± 0.01 |
| 15D10138                    | 3.3 %  | 0.1019839   | 1.007 | 59.4244   | 0.563 | 1.591443  | 2.400  | 109.4023  | 0.076 | 36.3614   | 0.207 | 0.09843 ± 0.00574 | 319.1 ± 18.6  | 29.61       | 2.16        | 0.79 ± 0.01 |
| 15D10139                    | 3.6 %  | 0.1163875   | 0.874 | 82.8794   | 0.449 | 1.993983  | 1.992  | 147.8259  | 0.072 | 42.3194   | 0.175 | 0.09647 ± 0.00421 | 312.8 ± 13.6  | 33.69       | 2.92        | 0.77 ± 0.01 |
| 15D10141                    | 3.9 %  | 0.2121446   | 0.630 | 182.4110  | 0.359 | 4.143524  | 0.905  | 315.8985  | 0.067 | 81.6060   | 0.095 | 0.10403 ± 0.00257 | 337.3 ± 8.3   | 40.26       | 6.25        | 0.74 ± 0.01 |
| 15D10142                    | 4.3 %  | ✓ 0.2261286 | 0.600 | 244.6292  | 0.345 | 5.458539  | 0.701  | 425.9376  | 0.066 | 90.9611   | 0.085 | 0.10057 ± 0.00195 | 326.0 ± 6.3   | 47.07       | 8.42        | 0.75 ± 0.01 |
| 15D10143                    | 4.6 %  | ✓ 0.1255636 | 0.901 | 147.2330  | 0.376 | 3.356899  | 1.090  | 268.9834  | 0.067 | 52.4083   | 0.145 | 0.09867 ± 0.00257 | 319.9 ± 8.3   | 50.62       | 5.32        | 0.79 ± 0.01 |
| 15D10144                    | 4.9 %  | ✓ 0.1726043 | 0.695 | 191.2915  | 0.357 | 4.834763  | 0.798  | 387.6831  | 0.066 | 74.4538   | 0.103 | 0.09805 ± 0.00189 | 317.9 ± 6.1   | 51.04       | 7.67        | 0.87 ± 0.01 |
| 15D10146                    | 5.2 %  | ✓ 0.1241176 | 0.930 | 132.9944  | 0.377 | 3.779099  | 1.031  | 300.2959  | 0.067 | 56.2565   | 0.133 | 0.09882 ± 0.00235 | 320.4 ± 7.6   | 52.73       | 5.94        | 0.97 ± 0.01 |
| 15D10147                    | 5.5 %  | ✓ 0.1271730 | 0.869 | 125.2590  | 0.389 | 3.846447  | 0.980  | 306.9440  | 0.067 | 57.8387   | 0.131 | 0.09690 ± 0.00220 | 314.2 ± 7.1   | 51.41       | 6.07        | 1.05 ± 0.01 |
| 15D10148                    | 5.8 %  | ✓ 0.1166350 | 0.963 | 108.1652  | 0.410 | 3.625944  | 1.071  | 282.3442  | 0.067 | 53.8873   | 0.139 | 0.09775 ± 0.00243 | 316.9 ± 7.9   | 51.20       | 5.58        | 1.12 ± 0.01 |
| 15D10150                    | 6.1 %  | ✓ 0.1012239 | 1.004 | 89.2739   | 0.450 | 3.119277  | 1.312  | 244.2471  | 0.068 | 47.4504   | 0.158 | 0.09939 ± 0.00255 | 322.2 ± 8.3   | 51.15       | 4.83        | 1.18 ± 0.01 |
| 15D10151                    | 6.5 %  | ✓ 0.0785494 | 1.114 | 63.4247   | 0.534 | 2.286745  | 1.694  | 180.3319  | 0.070 | 35.7134   | 0.210 | 0.09583 ± 0.00300 | 310.7 ± 9.7   | 48.38       | 3.57        | 1.22 ± 0.01 |
| 15D10152                    | 7.0 %  | ✓ 0.0904629 | 1.061 | 69.6751   | 0.513 | 2.596616  | 1.537  | 197.3680  | 0.070 | 40.7586   | 0.186 | 0.09770 ± 0.00299 | 316.7 ± 9.7   | 47.30       | 3.90        | 1.22 ± 0.01 |
| 15D10154                    | 7.6 %  | ✓ 0.1134323 | 0.935 | 78.4274   | 0.472 | 3.027102  | 1.260  | 227.2539  | 0.068 | 49.7415   | 0.150 | 0.09740 ± 0.00285 | 315.8 ± 9.2   | 44.49       | 4.49        | 1.25 ± 0.01 |
| 15D10155                    | 8.4 %  | ✓ 0.1185355 | 0.914 | 74.3706   | 0.476 | 2.925613  | 1.309  | 215.1993  | 0.068 | 50.2224   | 0.149 | 0.09668 ± 0.00307 | 313.4 ± 10.0  | 41.42       | 4.26        | 1.24 ± 0.01 |
| 15D10156                    | 9.4 %  | ✓ 0.1645742 | 0.776 | 89.7757   | 0.436 | 3.680849  | 1.016  | 251.7107  | 0.068 | 66.4581   | 0.113 | 0.09780 ± 0.00307 | 317.1 ± 10.0  | 37.03       | 4.98        | 1.21 ± 0.01 |
| 15D10158                    | 10.5 % | ✓ 0.1715187 | 0.726 | 80.1510   | 0.460 | 3.155080  | 1.281  | 213.8800  | 0.068 | 65.5893   | 0.118 | 0.09808 ± 0.00353 | 318.0 ± 11.4  | 31.98       | 4.23        | 1.15 ± 0.01 |
| 15D10159                    | 11.7 % | ✓ 0.1650063 | 0.715 | 67.8771   | 0.495 | 2.499337  | 1.488  | 163.0931  | 0.070 | 58.9973   | 0.127 | 0.09442 ± 0.00439 | 306.1 ± 14.2  | 26.10       | 3.23        | 1.03 ± 0.01 |
| 15D10160                    | 13.1 % | ✓ 0.1480464 | 0.824 | 51.5899   | 0.592 | 1.879304  | 2.078  | 120.2694  | 0.074 | 51.6667   | 0.146 | 0.09850 ± 0.00614 | 319.3 ± 19.9  | 22.92       | 2.38        | 1.00 ± 0.01 |
| 15D10162                    | 14.7 % | 0.1709657   | 0.710 | 68.2749   | 0.497 | 1.611960  | 2.328  | 102.9589  | 0.076 | 54.5837   | 0.141 | 0.09040 ± 0.00715 | 293.1 ± 23.2  | 17.04       | 2.04        | 0.65 ± 0.01 |
| 15D10163                    | 16.5 % | 0.1050505   | 0.934 | 57.5130   | 0.579 | 0.745241  | 5.157  | 47.7359   | 0.107 | 30.6235   | 0.245 | 0.08444 ± 0.01261 | 273.8 ± 40.9  | 13.15       | 0.94        | 0.36 ± 0.00 |
| 15D10164                    | 18.5 % | 0.0858475   | 1.148 | 72.6334   | 0.484 | 0.619238  | 6.092  | 34.9970   | 0.129 | 22.2977   | 0.331 | 0.07353 ± 0.01726 | 238.4 ± 56.0  | 11.53       | 0.69        | 0.21 ± 0.00 |
| 15D10166                    | 19.8 % | 0.0699534   | 1.390 | 54.3202   | 0.610 | 0.391888  | 9.311  | 23.3275   | 0.175 | 18.5177   | 0.403 | 0.08869 ± 0.02559 | 287.5 ± 83.0  | 11.16       | 0.46        | 0.18 ± 0.00 |
| 15D10167                    | 21.7 % | 0.0665272   | 1.288 | 74.0937   | 0.492 | 0.407495  | 9.095  | 19.4396   | 0.210 | 15.6377   | 0.478 | 0.09011 ± 0.02740 | 292.1 ± 88.8  | 11.17       | 0.38        | 0.11 ± 0.00 |
| 15D10168                    | 22.8 % | 0.0534786   | 1.504 | 57.7429   | 0.578 | 0.308902  | 12.309 | 14.1551   | 0.258 | 12.8391   | 0.571 | 0.10858 ± 0.03544 | 352.0 ± 114.9 | 11.94       | 0.28        | 0.11 ± 0.00 |
| 15D10170                    | 24.3 % | 0.0483766   | 1.760 | 44.7614   | 0.696 | 0.260990  | 15.016 | 10.5290   | 0.358 | 11.7901   | 0.627 | 0.09353 ± 0.05018 | 303.2 ± 162.7 | 8.33        | 0.21        | 0.10 ± 0.00 |
| Σ                           |        | 3.9000521   | 0.158 | 2600.9590 | 0.089 | 70.590064 | 0.304  | 5056.9786 | 0.015 | 1450.8357 | 0.029 |                   |               |             |             |             |

| Information on Analysis and Constants Used in Calculations | Results          | 40(a)/36(a) ± 2σ      | 40(r)/39(k) ± 2σ          | Age ± 2σ (ka)       | MSWD         | 39Ar(k) (% ,n)                          | K/Ca ± 2σ   |
|------------------------------------------------------------|------------------|-----------------------|---------------------------|---------------------|--------------|-----------------------------------------|-------------|
| Sample = 253-14                                            | Age Plateau      |                       | 0.09810 ± 0.00073 ± 0.74% | 318.0 ± 2.5 ± 0.78% | 1.12 34%     | 74.86 15                                | 0.97 ± 0.09 |
| Material = Groundmass                                      |                  |                       |                           |                     |              |                                         |             |
| Location = Kerguelen Plateau                               |                  |                       |                           |                     |              |                                         |             |
| Analyst = Dan Miggins                                      | Total Fusion Age |                       | 0.09826 ± 0.00074 ± 0.76% | 318.5 ± 2.5 ± 0.79% | 1.76 1.0564  | 2σ Confidence Limit Error Magnification |             |
| Project = KERGUELEN   FALLOON (14-PIL-01)                  |                  |                       |                           |                     |              |                                         |             |
| Mass Discrimination Law = LIN                              |                  |                       |                           |                     |              |                                         |             |
| Irradiation = 14-OSU-07 (7B20-14)                          | Normal Isochron  | 293.43 ± 4.90 ± 1.67% | 0.09886 ± 0.00204 ± 2.06% | 320.5 ± 6.7 ± 2.08% | 1.13 32%     | 74.86 15                                | 0.84 ± 0.00 |
| J = 0.00179298 ± 0.00000210                                |                  |                       |                           |                     |              |                                         |             |
| FCT-NM = 28.201 ± 0.023 Ma                                 |                  |                       |                           |                     |              |                                         |             |
| IGSN = Undefined                                           | Inverse Isochron | 293.43 ± 4.92 ± 1.68% | 0.09890 ± 0.00204 ± 2.07% | 320.6 ± 6.7 ± 2.08% | 1.78 1.0644  | 2σ Confidence Limit Error Magnification |             |
| Preferred Age = Undefined                                  |                  |                       |                           |                     |              |                                         |             |
| Classification = Undefined                                 |                  |                       |                           |                     |              |                                         |             |
| Experiment Type = Incremental Heating                      |                  |                       |                           |                     | 0.0000006716 | 8 Number of Iterations Convergence      |             |
| Extraction Method = Undefined                              |                  |                       |                           |                     |              |                                         |             |
| Heating = 77 sec                                           |                  |                       |                           |                     |              |                                         |             |
| Isolation = 6.00 min                                       |                  |                       |                           |                     |              |                                         |             |
| Instrument = ARGUS-VI-D                                    |                  |                       |                           |                     |              |                                         |             |
| Lithology = Undefined                                      |                  |                       |                           |                     |              |                                         |             |
| Lat-Lon = Undefined - Undefined                            |                  |                       |                           |                     |              |                                         |             |
| Collector Calibrations = 40Ar 36Ar                         |                  |                       |                           |                     |              |                                         |             |
|                                                            |                  |                       |                           |                     |              |                                         |             |



| OSU Argon Geochronology Lab |        |                 |           |                 |            |                  |            |                  |           |                  |          |                 |           |                 |            |                 |          |                  |           |                  |          |                 |          |                  |           |                 |          |                 |          |                 |            |                 |           |      |
|-----------------------------|--------|-----------------|-----------|-----------------|------------|------------------|------------|------------------|-----------|------------------|----------|-----------------|-----------|-----------------|------------|-----------------|----------|------------------|-----------|------------------|----------|-----------------|----------|------------------|-----------|-----------------|----------|-----------------|----------|-----------------|------------|-----------------|-----------|------|
| Degassing<br>Patterns       |        | 36Ar(a)<br>[fA] | %1σ       | 36Ar(c)<br>[fA] | %1σ        | 36Ar(ca)<br>[fA] | %1σ        | 36Ar(cl)<br>[fA] | %1σ       | 37Ar(ca)<br>[fA] | %1σ      | 38Ar(a)<br>[fA] | %1σ       | 38Ar(c)<br>[fA] | %1σ        | 38Ar(k)<br>[fA] | %1σ      | 38Ar(ca)<br>[fA] | %1σ       | 38Ar(cl)<br>[fA] | %1σ      | 39Ar(k)<br>[fA] | %1σ      | 39Ar(ca)<br>[fA] | %1σ       | 40Ar(r)<br>[fA] | %1σ      | 40Ar(a)<br>[fA] | %1σ      | 40Ar(c)<br>[fA] | %1σ        | 40Ar(k)<br>[fA] | %1σ       |      |
|                             |        |                 |           |                 |            |                  |            |                  |           |                  |          |                 |           |                 |            |                 |          |                  |           |                  |          |                 |          |                  |           |                 |          |                 |          |                 |            |                 |           |      |
| 15D10130                    | 2.0 %  |                 | 0.1761959 | 0.68            | 0.00000000 | 0.00             | 0.00734333 | 0.99             | 0.0001131 | 5.29             | 27.8154  | 0.99            | 0.0329310 | 0.68            | 0.00000000 | 0.00            | 0.604379 | 0.10             | 0.0003866 | 0.99             | 0.765978 | 5.37            | 53.1089  | 0.10             | 0.0187198 | 0.99            | 6.03360  | 6.03            | 52.06590 | 0.68            | 0.00000000 | 0.00            | 0.0536400 | 0.10 |
| 15D10132                    | 2.2 %  |                 | 0.1319569 | 0.89            | 0.00000000 | 0.00             | 0.0071899  | 1.03             | 0.0000882 | 6.32             | 27.2343  | 1.03            | 0.0246628 | 0.89            | 0.00000000 | 0.00            | 0.594231 | 0.10             | 0.0003786 | 1.03             | 0.597179 | 6.38            | 52.2171  | 0.10             | 0.0183287 | 1.03            | 5.51425  | 6.44            | 38.99328 | 0.89            | 0.00000000 | 0.00            | 0.0527393 | 0.10 |
| 15D10133                    | 2.4 %  |                 | 0.1279854 | 0.96            | 0.00000000 | 0.00             | 0.0089916  | 0.81             | 0.0000832 | 7.25             | 34.0590  | 0.81            | 0.0239205 | 0.96            | 0.00000000 | 0.00            | 0.739722 | 0.09             | 0.0004734 | 0.81             | 0.563025 | 7.31            | 65.0019  | 0.09             | 0.0229217 | 0.81            | 6.62305  | 5.61            | 37.81968 | 0.96            | 0.00000000 | 0.00            | 0.0656519 | 0.09 |
| 15D10134                    | 2.6 %  |                 | 0.1112429 | 1.04            | 0.00000000 | 0.00             | 0.0097760  | 0.79             | 0.0000669 | 8.46             | 37.0304  | 0.79            | 0.0207913 | 1.04            | 0.00000000 | 0.00            | 0.830261 | 0.09             | 0.0005147 | 0.79             | 0.452721 | 8.51            | 72.9579  | 0.09             | 0.0249215 | 0.79            | 7.52957  | 4.63            | 32.87227 | 1.04            | 0.00000000 | 0.00            | 0.0736875 | 0.09 |
| 15D10136                    | 2.8 %  |                 | 0.0946614 | 1.06            | 0.00000000 | 0.00             | 0.0114705  | 0.67             | 0.0000618 | 9.76             | 43.4490  | 0.67            | 0.0176922 | 1.06            | 0.00000000 | 0.00            | 0.937638 | 0.08             | 0.0006039 | 0.67             | 0.418201 | 9.80            | 82.3935  | 0.08             | 0.0292412 | 0.67            | 8.81827  | 3.45            | 27.97244 | 1.06            | 0.00000000 | 0.00            | 0.0832174 | 0.08 |
| 15D10137                    | 3.0 %  |                 | 0.1217945 | 0.98            | 0.00000000 | 0.00             | 0.0166791  | 0.52             | 0.0000645 | 8.73             | 63.1786  | 0.52            | 0.0227634 | 0.98            | 0.00000000 | 0.00            | 1.357991 | 0.08             | 0.0008782 | 0.52             | 0.436463 | 8.78            | 119.3314 | 0.08             | 0.0425192 | 0.52            | 11.17389 | 3.23            | 35.99029 | 0.98            | 0.00000000 | 0.00            | 0.1205247 | 0.08 |
| 15D10138                    | 3.3 %  |                 | 0.0862471 | 1.20            | 0.00000000 | 0.00             | 0.0156881  | 0.56             | 0.0000488 | 11.62            | 59.4244  | 0.56            | 0.0161196 | 1.20            | 0.00000000 | 0.00            | 1.244543 | 0.08             | 0.0008260 | 0.56             | 0.329955 | 11.65           | 109.3623 | 0.08             | 0.0399926 | 0.56            | 10.76491 | 2.92            | 25.48602 | 1.20            | 0.00000000 | 0.00            | 0.1104559 | 0.08 |
| 15D10139                    | 3.6 %  |                 | 0.0944640 | 1.08            | 0.00000000 | 0.00             | 0.0218802  | 0.45             | 0.0000434 | 13.57            | 82.8794  | 0.45            | 0.0176553 | 1.08            | 0.00000000 | 0.00            | 1.681624 | 0.07             | 0.0011520 | 0.45             | 0.293551 | 13.60           | 147.7701 | 0.07             | 0.0557778 | 0.45            | 14.25608 | 2.18            | 27.91410 | 1.08            | 0.00000000 | 0.00            | 0.1492478 | 0.07 |
| 15D10141                    | 3.9 %  |                 | 0.1639117 | 0.82            | 0.00000000 | 0.00             | 0.0481565  | 0.36             | 0.0000764 | 7.33             | 182.4110 | 0.36            | 0.0306351 | 0.82            | 0.00000000 | 0.00            | 3.593528 | 0.07             | 0.0025355 | 0.36             | 0.516825 | 7.39            | 315.7758 | 0.07             | 0.1227626 | 0.36            | 32.85112 | 1.23            | 48.43590 | 0.82            | 0.00000000 | 0.00            | 0.3189335 | 0.07 |
| 15D10142                    | 4.3 %  | ✓               | 0.1614608 | 0.85            | 0.00000000 | 0.00             | 0.0645821  | 0.35             | 0.0000857 | 6.69             | 244.6292 | 0.35            | 0.0301770 | 0.85            | 0.00000000 | 0.00            | 4.845296 | 0.07             | 0.0034003 | 0.35             | 0.579666 | 6.75            | 425.7729 | 0.07             | 0.1646354 | 0.35            | 42.81937 | 0.97            | 47.71167 | 0.85            | 0.00000000 | 0.00            | 0.4300306 | 0.07 |
| 15D10143                    | 4.6 %  | ✓               | 0.0866528 | 1.32            | 0.00000000 | 0.00             | 0.0388695  | 0.38             | 0.0000412 | 13.18            | 147.2330 | 0.38            | 0.0161954 | 1.32            | 0.00000000 | 0.00            | 3.059903 | 0.07             | 0.0020465 | 0.38             | 0.278754 | 13.21           | 268.8843 | 0.07             | 0.0990878 | 0.38            | 26.53084 | 1.30            | 25.60591 | 1.32            | 0.00000000 | 0.00            | 0.2715731 | 0.07 |
| 15D10144                    | 4.9 %  | ✓               | 0.1220443 | 0.99            | 0.00000000 | 0.00             | 0.0505010  | 0.36             | 0.0000590 | 9.74             | 191.2915 | 0.36            | 0.0228101 | 0.99            | 0.00000000 | 0.00            | 4.410368 | 0.07             | 0.0026590 | 0.36             | 0.398926 | 9.79            | 387.5543 | 0.07             | 0.1287392 | 0.36            | 37.99828 | 0.96            | 36.06410 | 0.99            | 0.00000000 | 0.00            | 0.3914299 | 0.07 |
| 15D10146                    | 5.2 %  | ✓               | 0.0889562 | 1.31            | 0.00000000 | 0.00             | 0.0351105  | 0.38             | 0.0000509 | 11.37            | 132.9944 | 0.38            | 0.0166259 | 1.31            | 0.00000000 | 0.00            | 3.416349 | 0.07             | 0.0018486 | 0.38             | 0.344276 | 11.41           | 300.2064 | 0.07             | 0.0895052 | 0.38            | 29.66672 | 1.18            | 26.28654 | 1.31            | 0.00000000 | 0.00            | 0.3032085 | 0.07 |
| 15D10147                    | 5.5 %  | ✓               | 0.0940551 | 1.18            | 0.00000000 | 0.00             | 0.0330684  | 0.39             | 0.0000496 | 11.31            | 125.2590 | 0.39            | 0.0175789 | 1.18            | 0.00000000 | 0.00            | 3.492063 | 0.07             | 0.0017411 | 0.39             | 0.335063 | 11.35           | 306.8597 | 0.07             | 0.0842993 | 0.39            | 29.73549 | 1.13            | 27.79327 | 1.18            | 0.00000000 | 0.00            | 0.3099283 | 0.07 |
| 15D10148                    | 5.8 %  | ✓               | 0.0880208 | 1.28            | 0.00000000 | 0.00             | 0.0285556  | 0.41             | 0.0000586 | 9.88             | 108.1652 | 0.41            | 0.0164511 | 1.28            | 0.00000000 | 0.00            | 3.212248 | 0.07             | 0.0015035 | 0.41             | 0.395741 | 9.92            | 282.2714 | 0.07             | 0.0727952 | 0.41            | 27.59206 | 1.24            | 26.01014 | 1.28            | 0.00000000 | 0.00            | 0.2850941 | 0.07 |
| 15D10150                    | 6.1 %  | ✓               | 0.0776075 | 1.32            | 0.00000000 | 0.00             | 0.0235683  | 0.45             | 0.0000480 | 12.65            | 89.2739  | 0.45            | 0.0145048 | 1.32            | 0.00000000 | 0.00            | 2.778848 | 0.07             | 0.0012409 | 0.45             | 0.324683 | 12.69           | 244.1870 | 0.07             | 0.0600814 | 0.45            | 24.27074 | 1.28            | 22.93301 | 1.32            | 0.00000000 | 0.00            | 0.2466289 | 0.07 |
| 15D10151                    | 6.5 %  | ✓               | 0.0617723 | 1.42            | 0.00000000 | 0.00             | 0.0167441  | 0.53             | 0.0000329 | 17.44            | 63.4247  | 0.53            | 0.0115452 | 1.42            | 0.00000000 | 0.00            | 2.051691 | 0.07             | 0.0008816 | 0.53             | 0.222627 | 17.46           | 180.2892 | 0.07             | 0.0426848 | 0.53            | 17.27757 | 1.57            | 18.25372 | 1.42            | 0.00000000 | 0.00            | 0.1820921 | 0.07 |
| 15D10152                    | 7.0 %  | ✓               | 0.0720188 | 1.34            | 0.00000000 | 0.00             | 0.0183942  | 0.51             | 0.0000498 | 11.90            | 69.6751  | 0.51            | 0.0134603 | 1.34            | 0.00000000 | 0.00            | 2.245514 | 0.07             | 0.0009685 | 0.51             | 0.336674 | 11.93           | 197.3211 | 0.07             | 0.0468913 | 0.51            | 19.27774 | 1.53            | 21.28156 | 1.34            | 0.00000000 | 0.00            | 0.1992943 | 0.07 |
| 15D10154                    | 7.6 %  | ✓               | 0.0926648 | 1.15            | 0.00000000 | 0.00             | 0.0207048  | 0.47             | 0.0000626 | 9.07             | 78.4274  | 0.47            | 0.0173191 | 1.15            | 0.00000000 | 0.00            | 2.585548 | 0.07             | 0.0010901 | 0.47             | 0.423145 | 9.12            | 227.2011 | 0.07             | 0.0527817 | 0.47            | 22.12957 | 1.46            | 27.38245 | 1.15            | 0.00000000 | 0.00            | 0.2294731 | 0.07 |
| 15D10155                    | 8.4 %  | ✓               | 0.0988338 | 1.10            | 0.00000000 | 0.00             | 0.0196338  | 0.48             | 0.0000678 | 8.43             | 74.3706  | 0.48            | 0.0184720 | 1.10            | 0.00000000 | 0.00            | 2.448398 | 0.07             | 0.0010338 | 0.48             | 0.457709 | 8.48            | 215.1492 | 0.07             | 0.0500514 | 0.48            | 20.79973 | 1.59            | 29.20540 | 1.10            | 0.00000000 | 0.00            | 0.2173007 | 0.07 |
| 15D10156                    | 9.4 %  | ✓               | 0.1407565 | 0.91            | 0.00000000 | 0.00             | 0.0237008  | 0.44             | 0.0001169 | 4.83             | 89.7757  | 0.44            | 0.0263074 | 0.91            | 0.00000000 | 0.00            | 2.863780 | 0.07             | 0.0012479 | 0.44             | 0.789514 | 4.92            | 251.6502 | 0.07             | 0.0604190 | 0.44            | 24.61043 | 1.57            | 41.59355 | 0.91            | 0.00000000 | 0.00            | 0.2541667 | 0.07 |
| 15D10158                    | 10.5 % | ✓               | 0.1502562 | 0.83            | 0.00000000 | 0.00             | 0.0211599  | 0.46             | 0.0001026 | 5.91             | 80.1510  | 0.46            | 0.0280829 | 0.83            | 0.00000000 | 0.00            | 2.433341 | 0.07             | 0.0011141 | 0.46             | 0.692542 | 5.98            | 213.8261 | 0.07             | 0.0539416 | 0.46            | 20.97261 | 1.80            | 44.40072 | 0.83            | 0.00000000 | 0.00            | 0.2159644 | 0.07 |
| 15D10159                    | 11.7 % | ✓               | 0.1469956 | 0.80            | 0.00000000 | 0.00             | 0.0179196  | 0.50             | 0.0000912 | 6.12             | 67.8771  | 0.50            | 0.0274735 | 0.80            | 0.00000000 | 0.00            | 1.855479 | 0.07             | 0.0009435 | 0.50             | 0.615441 | 6.19            | 163.0474 | 0.07             | 0.0456813 | 0.50            | 15.39542 | 2.32            | 43.43719 | 0.80            | 0.0000000  |                 |           |      |



| Additional<br>Parameters |        | 40Ar/39Ar | 1σ       | 37Ar/39Ar | 1σ       | 36Ar/39Ar | 1σ       | Time<br>(days) | 37Ar<br>(decay) | 39Ar<br>(decay) | 40Ar<br>(moles) |
|--------------------------|--------|-----------|----------|-----------|----------|-----------|----------|----------------|-----------------|-----------------|-----------------|
| 15D10130                 | 2.0 %  | 1.094593  | 0.001777 | 0.523558  | 0.005219 | 0.003457  | 0.000023 | 90.944         | 6.042325        | 1.00064279      | 2.791E-12       |
| 15D10132                 | 2.2 %  | 0.853066  | 0.001658 | 0.521376  | 0.005416 | 0.002666  | 0.000023 | 90.963         | 6.044564        | 1.00064292      | 2.139E-12       |
| 15D10133                 | 2.4 %  | 0.684483  | 0.001306 | 0.523785  | 0.004279 | 0.002108  | 0.000019 | 90.972         | 6.045724        | 1.00064299      | 2.136E-12       |
| 15D10134                 | 2.6 %  | 0.554589  | 0.001135 | 0.507385  | 0.004041 | 0.001659  | 0.000016 | 90.983         | 6.046968        | 1.00064306      | 1.943E-12       |
| 15D10136                 | 2.8 %  | 0.447376  | 0.000977 | 0.527149  | 0.003584 | 0.001288  | 0.000012 | 91.001         | 6.049125        | 1.00064319      | 1.770E-12       |
| 15D10137                 | 3.0 %  | 0.396106  | 0.000701 | 0.529250  | 0.002793 | 0.001161  | 0.000010 | 91.010         | 6.050287        | 1.00064326      | 2.270E-12       |
| 15D10138                 | 3.3 %  | 0.332364  | 0.000733 | 0.543173  | 0.003085 | 0.000932  | 0.000009 | 91.020         | 6.051449        | 1.00064333      | 1.745E-12       |
| 15D10139                 | 3.6 %  | 0.286279  | 0.000542 | 0.560655  | 0.002547 | 0.000787  | 0.000007 | 91.030         | 6.052611        | 1.00064340      | 2.031E-12       |
| 15D10141                 | 3.9 %  | 0.258330  | 0.000301 | 0.577435  | 0.002111 | 0.000672  | 0.000004 | 91.048         | 6.054770        | 1.00064352      | 3.917E-12       |
| 15D10142                 | 4.3 %  | ✓         | 0.213555 | 0.000230  | 0.574331 | 0.002018  | 0.000003 | 91.057         | 6.055850        | 1.00064359      | 4.366E-12       |
| 15D10143                 | 4.6 %  | ✓         | 0.194838 | 0.000312  | 0.547369 | 0.002093  | 0.000467 | 91.066         | 6.056930        | 1.00064365      | 2.516E-12       |
| 15D10144                 | 4.9 %  | ✓         | 0.192048 | 0.000234  | 0.493422 | 0.001791  | 0.000445 | 91.074         | 6.057927        | 1.00064371      | 3.574E-12       |
| 15D10146                 | 5.2 %  | ✓         | 0.187337 | 0.000279  | 0.442878 | 0.001695  | 0.000413 | 91.092         | 6.060005        | 1.00064383      | 2.700E-12       |
| 15D10147                 | 5.5 %  | ✓         | 0.188434 | 0.000276  | 0.408084 | 0.001610  | 0.000044 | 91.101         | 6.061085        | 1.00064390      | 2.776E-12       |
| 15D10148                 | 5.8 %  | ✓         | 0.190857 | 0.000294  | 0.383097 | 0.001590  | 0.000413 | 91.109         | 6.062083        | 1.00064395      | 2.587E-12       |
| 15D10150                 | 6.1 %  | ✓         | 0.194272 | 0.000334  | 0.365507 | 0.001665  | 0.000414 | 91.126         | 6.064162        | 1.00064408      | 2.278E-12       |
| 15D10151                 | 6.5 %  | ✓         | 0.198043 | 0.000438  | 0.351711 | 0.001895  | 0.000436 | 91.135         | 6.065244        | 1.00064414      | 1.714E-12       |
| 15D10152                 | 7.0 %  | ✓         | 0.206511 | 0.000410  | 0.353021 | 0.001827  | 0.000458 | 91.144         | 6.066242        | 1.00064420      | 1.956E-12       |
| 15D10154                 | 7.6 %  | ✓         | 0.218881 | 0.000360  | 0.345109 | 0.001645  | 0.000499 | 91.161         | 6.068323        | 1.00064432      | 2.388E-12       |
| 15D10155                 | 8.4 %  | ✓         | 0.233376 | 0.000383  | 0.345590 | 0.001663  | 0.000551 | 91.170         | 6.069405        | 1.00064439      | 2.411E-12       |
| 15D10156                 | 9.4 %  | ✓         | 0.264026 | 0.000349  | 0.356662 | 0.001574  | 0.000654 | 91.178         | 6.070404        | 1.00064444      | 3.190E-12       |
| 15D10158                 | 10.5 % | ✓         | 0.306664 | 0.000418  | 0.374748 | 0.001743  | 0.000802 | 91.196         | 6.072486        | 1.00064457      | 3.148E-12       |
| 15D10159                 | 11.7 % | ✓         | 0.361740 | 0.000526  | 0.416186 | 0.002081  | 0.001012 | 91.205         | 6.073569        | 1.00064463      | 2.832E-12       |
| 15D10160                 | 13.1 % | ✓         | 0.429591 | 0.000704  | 0.428953 | 0.002559  | 0.001231 | 91.213         | 6.074569        | 1.00064469      | 2.480E-12       |
| 15D10162                 | 14.7 % |           | 0.530150 | 0.000847  | 0.663127 | 0.003335  | 0.001661 | 91.231         | 6.076652        | 1.00064481      | 2.620E-12       |
| 15D10163                 | 16.5 % |           | 0.641520 | 0.001715  | 1.204817 | 0.007089  | 0.002201 | 91.240         | 6.077736        | 1.00064488      | 1.470E-12       |
| 15D10164                 | 18.5 % |           | 0.637133 | 0.002266  | 2.075419 | 0.010386  | 0.002453 | 91.249         | 6.078820        | 1.00064494      | 1.070E-12       |
| 15D10166                 | 19.8 % |           | 0.793816 | 0.003485  | 2.328592 | 0.014785  | 0.002999 | 91.266         | 6.080905        | 1.00064506      | 8.889E-13       |
| 15D10167                 | 21.7 % |           | 0.804423 | 0.004200  | 3.811479 | 0.020395  | 0.003422 | 91.275         | 6.081989        | 1.00064513      | 7.506E-13       |
| 15D10168                 | 22.8 % |           | 0.907033 | 0.005682  | 4.079301 | 0.025812  | 0.003778 | 91.284         | 6.083074        | 1.00064519      | 6.163E-13       |
| 15D10170                 | 24.3 % |           | 1.119769 | 0.008087  | 4.251226 | 0.033265  | 0.004595 | 91.302         | 6.085243        | 1.00064532      | 5.659E-13       |



| Procedure<br>Blanks |        | 36Ar<br>[fA] | 1σ        | 37Ar<br>[fA] | 1σ        | 38Ar<br>[fA] | 1σ        | 39Ar<br>[fA] | 1σ        | 40Ar<br>[fA] | 1σ        |
|---------------------|--------|--------------|-----------|--------------|-----------|--------------|-----------|--------------|-----------|--------------|-----------|
| 15D10130            | 2.0 %  | 0.0154357    | 0.0004497 | 0.0021603    | 0.0300292 | 0.0141256    | 0.0265266 | 0.0085437    | 0.0256007 | 4.6332377    | 0.0687609 |
| 15D10132            | 2.2 %  | 0.0150303    | 0.0004497 | 0.0011413    | 0.0300292 | 0.0009289    | 0.0265266 | 0.0103223    | 0.0256007 | 4.5467036    | 0.0687609 |
| 15D10133            | 2.4 %  | 0.0148350    | 0.0004497 | 0.0024786    | 0.0300292 | 0.0050891    | 0.0265266 | 0.0117327    | 0.0256007 | 4.5040403    | 0.0687609 |
| 15D10134            | 2.6 %  | 0.0146370    | 0.0004497 | 0.0036275    | 0.0300292 | 0.0073550    | 0.0265266 | 0.0132969    | 0.0256007 | 4.4600014    | 0.0687609 |
| 15D10136            | 2.8 %  | 0.0143214    | 0.0004497 | 0.0049232    | 0.0300292 | 0.0071507    | 0.0265266 | 0.0155578    | 0.0256007 | 4.3877647    | 0.0687609 |
| 15D10137            | 3.0 %  | 0.0141660    | 0.0004497 | 0.0052553    | 0.0300292 | 0.0054606    | 0.0265266 | 0.0163136    | 0.0256007 | 4.3510204    | 0.0687609 |
| 15D10138            | 3.3 %  | 0.0140208    | 0.0004497 | 0.0053316    | 0.0300292 | 0.0030292    | 0.0265266 | 0.0166471    | 0.0256007 | 4.3157827    | 0.0687609 |
| 15D10139            | 3.6 %  | 0.0138857    | 0.0004497 | 0.0051521    | 0.0300292 | 0.0001066    | 0.0265266 | 0.0165232    | 0.0256007 | 4.2820517    | 0.0687609 |
| 15D10141            | 3.9 %  | 0.0136617    | 0.0004497 | 0.0041398    | 0.0300292 | 0.0058711    | 0.0265266 | 0.0151046    | 0.0256007 | 4.2234056    | 0.0687609 |
| 15D10142            | 4.3 %  | 0.0135629    | 0.0004497 | 0.0033027    | 0.0300292 | 0.0088210    | 0.0265266 | 0.0138959    | 0.0256007 | 4.1960313    | 0.0687609 |
| 15D10143            | 4.6 %  | 0.0134728    | 0.0004497 | 0.0022450    | 0.0300292 | 0.0115766    | 0.0265266 | 0.0124503    | 0.0256007 | 4.1699560    | 0.0687609 |
| 15D10144            | 4.9 %  | 0.0133975    | 0.0004497 | 0.0010729    | 0.0300292 | 0.0138594    | 0.0265266 | 0.0109957    | 0.0256007 | 4.1470396    | 0.0687609 |
| 15D10146            | 5.2 %  | 0.0132644    | 0.0004497 | 0.0019727    | 0.0300292 | 0.0175354    | 0.0265266 | 0.0080690    | 0.0256007 | 4.1028524    | 0.0687609 |
| 15D10147            | 5.5 %  | 0.0132080    | 0.0004497 | 0.0038789    | 0.0300292 | 0.0187669    | 0.0265266 | 0.0069149    | 0.0256007 | 4.0817737    | 0.0687609 |
| 15D10148            | 5.8 %  | 0.0131638    | 0.0004497 | 0.0058343    | 0.0300292 | 0.0194545    | 0.0265266 | 0.0062977    | 0.0256007 | 4.0634696    | 0.0687609 |
| 15D10150            | 6.1 %  | 0.0130955    | 0.0004497 | 0.0105117    | 0.0300292 | 0.0194889    | 0.0265266 | 0.0072181    | 0.0256007 | 4.0288911    | 0.0687609 |
| 15D10151            | 6.5 %  | 0.0130728    | 0.0004497 | 0.0132664    | 0.0300292 | 0.0187971    | 0.0265266 | 0.0093738    | 0.0256007 | 4.0128090    | 0.0687609 |
| 15D10152            | 7.0 %  | 0.0130597    | 0.0004497 | 0.0160050    | 0.0300292 | 0.0177766    | 0.0265266 | 0.0127203    | 0.0256007 | 3.9991171    | 0.0687609 |
| 15D10154            | 7.6 %  | 0.0130562    | 0.0004497 | 0.0223141    | 0.0300292 | 0.0147221    | 0.0265266 | 0.0250488    | 0.0256007 | 3.9741475    | 0.0687609 |
| 15D10155            | 8.4 %  | 0.0130672    | 0.0004497 | 0.0259173    | 0.0300292 | 0.0128153    | 0.0265266 | 0.0350059    | 0.0256007 | 3.9630620    | 0.0687609 |
| 15D10156            | 9.4 %  | 0.0130851    | 0.0004497 | 0.0294391    | 0.0300292 | 0.0109959    | 0.0265266 | 0.0468021    | 0.0256007 | 3.9539823    | 0.0687609 |
| 15D10158            | 10.5 % | 0.0131465    | 0.0004497 | 0.0373800    | 0.0300292 | 0.0075348    | 0.0265266 | 0.0809329    | 0.0256007 | 3.9386214    | 0.0687609 |
| 15D10159            | 11.7 % | 0.0131912    | 0.0004497 | 0.0418317    | 0.0300292 | 0.0062286    | 0.0265266 | 0.1046561    | 0.0256007 | 3.9325325    | 0.0687609 |
| 15D10160            | 13.1 % | 0.0132402    | 0.0004497 | 0.0461368    | 0.0300292 | 0.0055419    | 0.0265266 | 0.1307479    | 0.0256007 | 3.9280650    | 0.0687609 |
| 15D10162            | 14.7 % | 0.0133663    | 0.0004497 | 0.0557094    | 0.0300292 | 0.0064864    | 0.0265266 | 0.1999081    | 0.0256007 | 3.9223130    | 0.0687609 |
| 15D10163            | 16.5 % | 0.0134447    | 0.0004497 | 0.0610096    | 0.0300292 | 0.0087039    | 0.0265266 | 0.2448355    | 0.0256007 | 3.9212207    | 0.0687609 |
| 15D10164            | 18.5 % | 0.0135318    | 0.0004497 | 0.0665305    | 0.0300292 | 0.0124529    | 0.0265266 | 0.2966760    | 0.0256007 | 3.9214275    | 0.0687609 |
| 15D10166            | 19.8 % | 0.0137240    | 0.0004497 | 0.0777675    | 0.0300292 | 0.0250569    | 0.0265266 | 0.4181311    | 0.0256007 | 3.9254764    | 0.0687609 |
| 15D10167            | 21.7 % | 0.0138368    | 0.0004497 | 0.0839332    | 0.0300292 | 0.0350283    | 0.0265266 | 0.4938770    | 0.0256007 | 3.9294806    | 0.0687609 |
| 15D10168            | 22.8 % | 0.0139583    | 0.0004497 | 0.0903194    | 0.0300292 | 0.0477881    | 0.0265266 | 0.5791494    | 0.0256007 | 3.9347839    | 0.0687609 |
| 15D10170            | 24.3 % | 0.0142275    | 0.0004497 | 0.1037539    | 0.0300292 | 0.0831657    | 0.0265266 | 0.7812191    | 0.0256007 | 3.9492878    | 0.0687609 |



| OSU Argon Geochronology Lab |        |              |           |        |                |              |        |        |                |              |          |        |                |              |        |        |                |              |         |        |                |
|-----------------------------|--------|--------------|-----------|--------|----------------|--------------|--------|--------|----------------|--------------|----------|--------|----------------|--------------|--------|--------|----------------|--------------|---------|--------|----------------|
| Intercept<br>Values         |        | 36Ar<br>[fA] | 1σ        | r2     |                | 37Ar<br>[fA] | 1σ     | r2     |                | 38Ar<br>[fA] | 1σ       | r2     |                | 39Ar<br>[fA] | 1σ     | r2     |                | 40Ar<br>[fA] | 1σ      | r2     |                |
| 15D10130                    | 2.0 %  | 0.1877752    | 0.0009197 | 0.4014 | EXP 150 of 150 | 4.5156       | 0.0298 | 0.3854 | EXP 150 of 150 | 1.371234     | 0.029035 | 0.0498 | EXP 150 of 150 | 52.7563      | 0.0298 | 0.9928 | EXP 150 of 150 | 62.95709     | 0.03024 | 0.1714 | EXP 150 of 150 |
| 15D10132                    | 2.2 %  | 0.1456886    | 0.0009372 | 0.2374 | EXP 150 of 150 | 4.4164       | 0.0313 | 0.4179 | EXP 150 of 150 | 1.201507     | 0.025487 | 0.0822 | EXP 150 of 150 | 51.8722      | 0.0289 | 0.9929 | EXP 150 of 150 | 49.23779     | 0.02943 | 0.8518 | EXP 150 of 150 |
| 15D10133                    | 2.4 %  | 0.1434524    | 0.0009995 | 0.1842 | EXP 150 of 150 | 5.5210       | 0.0281 | 0.5711 | EXP 149 of 150 | 1.314913     | 0.029853 | 0.0835 | EXP 150 of 150 | 64.5716      | 0.0296 | 0.9953 | EXP 150 of 150 | 49.14309     | 0.03089 | 0.8776 | EXP 150 of 150 |
| 15D10134                    | 2.6 %  | 0.1282640    | 0.0009294 | 0.0743 | EXP 150 of 150 | 6.0005       | 0.0313 | 0.4934 | EXP 150 of 150 | 1.294625     | 0.026569 | 0.0651 | EXP 150 of 150 | 72.4742      | 0.0338 | 0.9952 | EXP 150 of 150 | 45.05435     | 0.03019 | 0.9249 | EXP 150 of 150 |
| 15D10136                    | 2.8 %  | 0.1139737    | 0.0007717 | 0.0260 | EXP 149 of 150 | 7.0374       | 0.0289 | 0.6616 | EXP 150 of 150 | 1.363355     | 0.030011 | 0.0996 | EXP 150 of 150 | 81.8489      | 0.0318 | 0.9966 | EXP 150 of 150 | 41.36995     | 0.02953 | 0.9412 | EXP 150 of 150 |
| 15D10137                    | 3.0 %  | 0.1441704    | 0.0009560 | 0.1967 | EXP 150 of 150 | 10.2329      | 0.0293 | 0.7979 | EXP 150 of 150 | 1.799834     | 0.026256 | 0.1006 | EXP 150 of 150 | 118.5365     | 0.0385 | 0.9976 | EXP 150 of 150 | 51.77454     | 0.03187 | 0.8905 | EXP 150 of 150 |
| 15D10138                    | 3.3 %  | 0.1097226    | 0.0008099 | 0.0473 | EXP 150 of 150 | 9.6226       | 0.0326 | 0.7299 | EXP 150 of 150 | 1.573707     | 0.026710 | 0.1481 | EXP 149 of 150 | 108.6366     | 0.0336 | 0.9978 | EXP 150 of 150 | 40.78391     | 0.03117 | 0.9518 | EXP 149 of 150 |
| 15D10139                    | 3.6 %  | 0.1231038    | 0.0007852 | 0.1869 | EXP 150 of 150 | 13.4204      | 0.0288 | 0.8796 | EXP 150 of 150 | 1.968072     | 0.028743 | 0.1100 | EXP 150 of 150 | 146.7853     | 0.0382 | 0.9985 | EXP 150 of 150 | 46.72571     | 0.02822 | 0.9527 | EXP 150 of 150 |
| 15D10141                    | 3.9 %  | 0.2127385    | 0.0010325 | 0.2681 | EXP 150 of 150 | 29.5338      | 0.0346 | 0.9613 | EXP 150 of 150 | 4.083588     | 0.025248 | 0.4157 | EXP 150 of 150 | 313.6545     | 0.0429 | 0.9996 | EXP 150 of 150 | 86.06893     | 0.03684 | 0.3932 | EXP 150 of 150 |
| 15D10142                    | 4.3 %  | 0.2257623    | 0.0010367 | 0.2761 | EXP 150 of 150 | 39.6026      | 0.0360 | 0.9750 | EXP 150 of 150 | 5.378494     | 0.025948 | 0.5867 | EXP 150 of 150 | 422.9053     | 0.0558 | 0.9996 | EXP 150 of 150 | 95.42413     | 0.03471 | 0.6890 | EXP 150 of 150 |
| 15D10143                    | 4.6 %  | 0.1313018    | 0.0009042 | 0.0028 | EXP 150 of 150 | 23.8308      | 0.0343 | 0.9406 | EXP 150 of 150 | 3.301521     | 0.024126 | 0.4070 | EXP 150 of 150 | 267.0722     | 0.0424 | 0.9994 | EXP 150 of 150 | 56.73213     | 0.03301 | 0.9620 | EXP 150 of 150 |
| 15D10144                    | 4.9 %  | 0.1753695    | 0.0009287 | 0.1050 | EXP 149 of 150 | 30.9587      | 0.0350 | 0.9612 | EXP 150 of 150 | 4.757819     | 0.026600 | 0.5213 | EXP 149 of 150 | 384.9215     | 0.0468 | 0.9997 | EXP 150 of 150 | 78.81942     | 0.03348 | 0.9228 | EXP 150 of 150 |
| 15D10146                    | 5.2 %  | 0.1297365    | 0.0009314 | 0.0006 | EXP 150 of 150 | 21.5192      | 0.0284 | 0.9470 | EXP 149 of 150 | 3.712254     | 0.027391 | 0.4366 | EXP 150 of 150 | 298.1563     | 0.0464 | 0.9995 | EXP 150 of 150 | 60.52447     | 0.02969 | 0.9621 | EXP 150 of 150 |
| 15D10147                    | 5.5 %  | 0.1325474    | 0.0008736 | 0.0417 | EXP 150 of 150 | 20.2660      | 0.0314 | 0.9306 | EXP 150 of 150 | 3.777491     | 0.025632 | 0.4062 | EXP 150 of 150 | 304.7557     | 0.0422 | 0.9996 | EXP 150 of 150 | 62.09025     | 0.03168 | 0.9588 | EXP 150 of 150 |
| 15D10148                    | 5.8 %  | 0.1226142    | 0.0009037 | 0.0064 | EXP 149 of 150 | 17.5000      | 0.0318 | 0.9088 | EXP 150 of 150 | 3.559178     | 0.027289 | 0.4060 | EXP 150 of 150 | 280.3312     | 0.0399 | 0.9995 | EXP 150 of 150 | 58.10896     | 0.03005 | 0.9638 | EXP 149 of 150 |
| 15D10150                    | 6.1 %  | 0.1080841    | 0.0007981 | 0.0286 | EXP 150 of 150 | 14.4443      | 0.0337 | 0.8663 | EXP 150 of 150 | 3.059087     | 0.030203 | 0.2084 | EXP 150 of 150 | 242.5075     | 0.0401 | 0.9994 | EXP 150 of 150 | 51.61857     | 0.03023 | 0.9622 | EXP 150 of 150 |
| 15D10151                    | 6.5 %  | 0.0867837    | 0.0006555 | 0.0049 | EXP 149 of 150 | 10.2659      | 0.0315 | 0.7782 | EXP 150 of 150 | 2.238110     | 0.027370 | 0.1472 | EXP 150 of 150 | 179.0515     | 0.0415 | 0.9988 | EXP 150 of 150 | 39.83103     | 0.03020 | 0.9745 | EXP 150 of 150 |
| 15D10152                    | 7.0 %  | 0.0979501    | 0.0007442 | 0.0002 | EXP 150 of 150 | 11.2772      | 0.0332 | 0.7819 | EXP 150 of 150 | 2.544959     | 0.028924 | 0.1838 | EXP 150 of 150 | 195.9691     | 0.0428 | 0.9989 | EXP 150 of 150 | 44.87737     | 0.03250 | 0.9620 | EXP 150 of 150 |
| 15D10154                    | 7.6 %  | 0.1195012    | 0.0008369 | 0.0652 | EXP 150 of 150 | 12.6938      | 0.0313 | 0.8478 | EXP 149 of 150 | 2.972882     | 0.026441 | 0.3106 | EXP 150 of 150 | 225.6535     | 0.0387 | 0.9993 | EXP 150 of 150 | 53.86167     | 0.02938 | 0.9526 | EXP 150 of 150 |
| 15D10155                    | 8.4 %  | 0.1243010    | 0.0008585 | 0.0368 | EXP 150 of 150 | 12.0398      | 0.0292 | 0.8385 | EXP 150 of 150 | 2.874624     | 0.026670 | 0.2428 | EXP 150 of 150 | 213.6951     | 0.0402 | 0.9992 | EXP 150 of 150 | 54.33294     | 0.03018 | 0.9464 | EXP 150 of 150 |
| 15D10156                    | 9.4 %  | 0.1675218    | 0.0010257 | 0.1078 | EXP 150 of 150 | 14.5294      | 0.0297 | 0.8781 | EXP 150 of 150 | 3.621825     | 0.025226 | 0.4566 | EXP 150 of 150 | 249.9571     | 0.0450 | 0.9993 | EXP 150 of 150 | 70.60723     | 0.03129 | 0.7991 | EXP 150 of 150 |
| 15D10158                    | 10.5 % | 0.1740998    | 0.0009826 | 0.2335 | EXP 150 of 150 | 12.9784      | 0.0297 | 0.8638 | EXP 150 of 150 | 3.106377     | 0.029508 | 0.2232 | EXP 150 of 150 | 212.4312     | 0.0371 | 0.9993 | EXP 150 of 150 | 69.72046     | 0.03612 | 0.5416 | EXP 150 of 150 |
| 15D10159                    | 11.7 % | 0.1680333    | 0.0009165 | 0.3476 | EXP 150 of 150 | 10.9992      | 0.0279 | 0.8266 | EXP 149 of 150 | 2.460496     | 0.025175 | 0.2482 | EXP 150 of 150 | 162.0312     | 0.0338 | 0.9990 | EXP 150 of 150 | 63.10302     | 0.03085 | 0.7684 | EXP 150 of 150 |
| 15D10160                    | 13.1 % | 0.1521671    | 0.0009803 | 0.1533 | EXP 150 of 150 | 8.3729       | 0.0282 | 0.7405 | EXP 149 of 150 | 1.849241     | 0.027865 | 0.1689 | EXP 150 of 150 | 119.5399     | 0.0337 | 0.9982 | EXP 150 of 150 | 55.74643     | 0.03181 | 0.8104 | EXP 150 of 150 |
| 15D10162                    | 14.7 % | 0.1738007    | 0.0009484 | 0.3596 | EXP 150 of 150 | 11.0717      | 0.0286 | 0.8238 | EXP 150 of 150 | 1.584440     | 0.025757 | 0.0874 | EXP 150 of 150 | 102.4224     | 0.0310 | 0.9979 | EXP 150 of 150 | 58.66628     | 0.03449 | 0.5838 | EXP 150 of 150 |
| 15D10163                    | 16.5 % | 0.1120241    | 0.0007552 | 0.1114 | EXP 150 of 150 | 9.3389       | 0.0328 | 0.7356 | EXP 150 of 150 | 0.726814     | 0.027100 | 0.0121 | EXP 150 of 150 | 47.6393      | 0.0310 | 0.9903 | EXP 150 of 150 | 34.63465     | 0.03059 | 0.9481 | EXP 150 of 150 |
| 15D10164                    | 18.5 % | 0.0940912    | 0.0007761 | 0.0668 | EXP 150 of 150 | 11.7816      | 0.0293 | 0.8453 | EXP 150 of 150 | 0.598705     | 0.026115 | 0.0421 | EXP 150 of 150 | 35.0433      | 0.0291 | 0.9836 | EXP 150 of 150 | 26.28461     | 0.02765 | 0.9735 | EXP 149 of 150 |
| 15D10166                    | 19.8 % | 0.0793684    | 0.0007725 | 0.0063 | EXP 150 of 150 | 8.8361       | 0.0339 | 0.6989 | EXP 150 of 150 | 0.361718     | 0.024353 | 0.0075 | EXP 150 of 150 | 23.5788      | 0.0277 | 0.9671 | EXP 150 of 150 | 22.49758     | 0.02933 | 0.9706 | EXP 150 of 150 |
| 15D10167                    | 21.7 % | 0.0762659    | 0.0006435 | 0.0011 | EXP 150 of 150 | 12.0283      | 0.0324 | 0.8136 | EXP 150 of 150 | 0.367150     | 0.025178 | 0.0709 | EXP 150 of 150 | 19.7944      | 0.0289 | 0.9488 | EXP 150 of 150 | 19.61306     | 0.02981 | 0.9750 | EXP 150 of 150 |
| 15D10168                    | 22.8 % | 0.0641427    | 0.0005896 | 0.0121 | EXP 150 of 150 | 9.3972       | 0.0328 | 0.6996 | EXP 150 of 150 | 0.257083     | 0.026540 | 0.0123 | EXP 150 of 150 | 14.6330      | 0.0239 | 0.9358 | EXP 150 of 150 | 16.81162     | 0.02603 | 0.9821 | EXP 150 of 150 |
| 15D10170                    | 24.3 % | 0.0596242    | 0.0006478 | 0.0003 | EXP 150 of 150 | 7.3157       | 0.0327 | 0.6156 | EXP 150 of 150 | 0.174419     | 0.028148 | 0.0146 | EXP 150 of 150 | 11.2349      | 0.0264 | 0.8638 | EXP 150 of 150 | 15.77400     | 0.02784 | 0.9795 | EXP 150 of 150 |



| OSU Argon Geochronology Lab |        |        |            |                   |             |      |                  |                  |       |                     |                    |       |            |       |               |       |             |       |              |                        |     |       |      |      |     |        |             |       |       |         |
|-----------------------------|--------|--------|------------|-------------------|-------------|------|------------------|------------------|-------|---------------------|--------------------|-------|------------|-------|---------------|-------|-------------|-------|--------------|------------------------|-----|-------|------|------|-----|--------|-------------|-------|-------|---------|
| Sample Parameters           |        | Sample | Material   | Location          | Analyst     | Temp | Standard Name    | Standard (in Ma) | %1σ   | Standard Reference  | Standard 40Ar/39Ar | %1σ   | J          | %1σ   | Air 40Ar/36Ar | %1σ   | MDF (lin)   | %1σ   | Volume Ratio | Sensitivity (mol/volt) | Day | Month | Year | Hour | Min | Resist | Irradiation | X-pos | Y-pos | Z/H-pos |
| 15D10130                    | 2.0 %  | 253-14 | Groundmass | Kerguelen Plateau | Dan Miggins | 2    | FCT-NM (7B20-14) | 28.201           | 0.082 | Kuiper et al (2008) | 8.76608            | 0.117 | 0.00179298 | 0.117 | 303.409       | 0.117 | 0.993474796 | 0.065 | 1            | 4.8E-14                | 1   | APR   | 2015 | 13   | 45  | 1      | 14-OSU-07   | 0.00  | 0.00  | 26.44   |
| 15D10132                    | 2.2 %  | 253-14 | Groundmass | Kerguelen Plateau | Dan Miggins | 2.2  | FCT-NM (7B20-14) | 28.201           | 0.082 | Kuiper et al (2008) | 8.76608            | 0.117 | 0.00179298 | 0.117 | 303.409       | 0.117 | 0.993474796 | 0.065 | 1            | 4.8E-14                | 1   | APR   | 2015 | 14   | 12  | 1      | 14-OSU-07   | 0.00  | 0.00  | 26.44   |
| 15D10133                    | 2.4 %  | 253-14 | Groundmass | Kerguelen Plateau | Dan Miggins | 2.4  | FCT-NM (7B20-14) | 28.201           | 0.082 | Kuiper et al (2008) | 8.76608            | 0.117 | 0.00179298 | 0.117 | 303.409       | 0.117 | 0.993474796 | 0.065 | 1            | 4.8E-14                | 1   | APR   | 2015 | 14   | 26  | 1      | 14-OSU-07   | 0.00  | 0.00  | 26.44   |
| 15D10134                    | 2.6 %  | 253-14 | Groundmass | Kerguelen Plateau | Dan Miggins | 2.6  | FCT-NM (7B20-14) | 28.201           | 0.082 | Kuiper et al (2008) | 8.76608            | 0.117 | 0.00179298 | 0.117 | 303.409       | 0.117 | 0.993474796 | 0.065 | 1            | 4.8E-14                | 1   | APR   | 2015 | 14   | 41  | 1      | 14-OSU-07   | 0.00  | 0.00  | 26.44   |
| 15D10136                    | 2.8 %  | 253-14 | Groundmass | Kerguelen Plateau | Dan Miggins | 2.8  | FCT-NM (7B20-14) | 28.201           | 0.082 | Kuiper et al (2008) | 8.76608            | 0.117 | 0.00179298 | 0.117 | 303.409       | 0.117 | 0.993474796 | 0.065 | 1            | 4.8E-14                | 1   | APR   | 2015 | 15   | 7   | 1      | 14-OSU-07   | 0.00  | 0.00  | 26.44   |
| 15D10137                    | 3.0 %  | 253-14 | Groundmass | Kerguelen Plateau | Dan Miggins | 3    | FCT-NM (7B20-14) | 28.201           | 0.082 | Kuiper et al (2008) | 8.76608            | 0.117 | 0.00179298 | 0.117 | 303.409       | 0.117 | 0.993474796 | 0.065 | 1            | 4.8E-14                | 1   | APR   | 2015 | 15   | 21  | 1      | 14-OSU-07   | 0.00  | 0.00  | 26.44   |
| 15D10138                    | 3.3 %  | 253-14 | Groundmass | Kerguelen Plateau | Dan Miggins | 3.3  | FCT-NM (7B20-14) | 28.201           | 0.082 | Kuiper et al (2008) | 8.76608            | 0.117 | 0.00179298 | 0.117 | 303.409       | 0.117 | 0.993474796 | 0.065 | 1            | 4.8E-14                | 1   | APR   | 2015 | 15   | 35  | 1      | 14-OSU-07   | 0.00  | 0.00  | 26.44   |
| 15D10139                    | 3.6 %  | 253-14 | Groundmass | Kerguelen Plateau | Dan Miggins | 3.6  | FCT-NM (7B20-14) | 28.201           | 0.082 | Kuiper et al (2008) | 8.76608            | 0.117 | 0.00179298 | 0.117 | 303.409       | 0.117 | 0.993474796 | 0.065 | 1            | 4.8E-14                | 1   | APR   | 2015 | 15   | 49  | 1      | 14-OSU-07   | 0.00  | 0.00  | 26.44   |
| 15D10141                    | 3.9 %  | 253-14 | Groundmass | Kerguelen Plateau | Dan Miggins | 3.9  | FCT-NM (7B20-14) | 28.201           | 0.082 | Kuiper et al (2008) | 8.76608            | 0.117 | 0.00179298 | 0.117 | 303.409       | 0.117 | 0.993474796 | 0.065 | 1            | 4.8E-14                | 1   | APR   | 2015 | 16   | 15  | 1      | 14-OSU-07   | 0.00  | 0.00  | 26.44   |
| 15D10142                    | 4.3 %  | 253-14 | Groundmass | Kerguelen Plateau | Dan Miggins | 4.3  | FCT-NM (7B20-14) | 28.201           | 0.082 | Kuiper et al (2008) | 8.76608            | 0.117 | 0.00179298 | 0.117 | 303.409       | 0.117 | 0.993474796 | 0.065 | 1            | 4.8E-14                | 1   | APR   | 2015 | 16   | 28  | 1      | 14-OSU-07   | 0.00  | 0.00  | 26.44   |
| 15D10143                    | 4.6 %  | 253-14 | Groundmass | Kerguelen Plateau | Dan Miggins | 4.6  | FCT-NM (7B20-14) | 28.201           | 0.082 | Kuiper et al (2008) | 8.76608            | 0.117 | 0.00179298 | 0.117 | 303.409       | 0.117 | 0.993474796 | 0.065 | 1            | 4.8E-14                | 1   | APR   | 2015 | 16   | 41  | 1      | 14-OSU-07   | 0.00  | 0.00  | 26.44   |
| 15D10144                    | 4.9 %  | 253-14 | Groundmass | Kerguelen Plateau | Dan Miggins | 4.9  | FCT-NM (7B20-14) | 28.201           | 0.082 | Kuiper et al (2008) | 8.76608            | 0.117 | 0.00179298 | 0.117 | 303.409       | 0.117 | 0.993474796 | 0.065 | 1            | 4.8E-14                | 1   | APR   | 2015 | 16   | 53  | 1      | 14-OSU-07   | 0.00  | 0.00  | 26.44   |
| 15D10146                    | 5.2 %  | 253-14 | Groundmass | Kerguelen Plateau | Dan Miggins | 5.2  | FCT-NM (7B20-14) | 28.201           | 0.082 | Kuiper et al (2008) | 8.76608            | 0.117 | 0.00179298 | 0.117 | 303.409       | 0.117 | 0.993474796 | 0.065 | 1            | 4.8E-14                | 1   | APR   | 2015 | 17   | 18  | 1      | 14-OSU-07   | 0.00  | 0.00  | 26.44   |
| 15D10147                    | 5.5 %  | 253-14 | Groundmass | Kerguelen Plateau | Dan Miggins | 5.5  | FCT-NM (7B20-14) | 28.201           | 0.082 | Kuiper et al (2008) | 8.76608            | 0.117 | 0.00179298 | 0.117 | 303.409       | 0.117 | 0.993474796 | 0.065 | 1            | 4.8E-14                | 1   | APR   | 2015 | 17   | 31  | 1      | 14-OSU-07   | 0.00  | 0.00  | 26.44   |
| 15D10148                    | 5.8 %  | 253-14 | Groundmass | Kerguelen Plateau | Dan Miggins | 5.8  | FCT-NM (7B20-14) | 28.201           | 0.082 | Kuiper et al (2008) | 8.76608            | 0.117 | 0.00179298 | 0.117 | 303.409       | 0.117 | 0.993474796 | 0.065 | 1            | 4.8E-14                | 1   | APR   | 2015 | 17   | 43  | 1      | 14-OSU-07   | 0.00  | 0.00  | 26.44   |
| 15D10150                    | 6.1 %  | 253-14 | Groundmass | Kerguelen Plateau | Dan Miggins | 6.1  | FCT-NM (7B20-14) | 28.201           | 0.082 | Kuiper et al (2008) | 8.76608            | 0.117 | 0.00179298 | 0.117 | 303.409       | 0.117 | 0.993474796 | 0.065 | 1            | 4.8E-14                | 1   | APR   | 2015 | 18   | 8   | 1      | 14-OSU-07   | 0.00  | 0.00  | 26.44   |
| 15D10151                    | 6.5 %  | 253-14 | Groundmass | Kerguelen Plateau | Dan Miggins | 6.5  | FCT-NM (7B20-14) | 28.201           | 0.082 | Kuiper et al (2008) | 8.76608            | 0.117 | 0.00179298 | 0.117 | 303.409       | 0.117 | 0.993474796 | 0.065 | 1            | 4.8E-14                | 1   | APR   | 2015 | 18   | 21  | 1      | 14-OSU-07   | 0.00  | 0.00  | 26.44   |
| 15D10152                    | 7.0 %  | 253-14 | Groundmass | Kerguelen Plateau | Dan Miggins | 7    | FCT-NM (7B20-14) | 28.201           | 0.082 | Kuiper et al (2008) | 8.76608            | 0.117 | 0.00179298 | 0.117 | 303.409       | 0.117 | 0.993474796 | 0.065 | 1            | 4.8E-14                | 1   | APR   | 2015 | 18   | 33  | 1      | 14-OSU-07   | 0.00  | 0.00  | 26.44   |
| 15D10154                    | 7.6 %  | 253-14 | Groundmass | Kerguelen Plateau | Dan Miggins | 7.6  | FCT-NM (7B20-14) | 28.201           | 0.082 | Kuiper et al (2008) | 8.76608            | 0.117 | 0.00179298 | 0.117 | 303.409       | 0.117 | 0.993474796 | 0.065 | 1            | 4.8E-14                | 1   | APR   | 2015 | 18   | 58  | 1      | 14-OSU-07   | 0.00  | 0.00  | 26.44   |
| 15D10155                    | 8.4 %  | 253-14 | Groundmass | Kerguelen Plateau | Dan Miggins | 8.4  | FCT-NM (7B20-14) | 28.201           | 0.082 | Kuiper et al (2008) | 8.76608            | 0.117 | 0.00179298 | 0.117 | 303.409       | 0.117 | 0.993474796 | 0.065 | 1            | 4.8E-14                | 1   | APR   | 2015 | 19   | 11  | 1      | 14-OSU-07   | 0.00  | 0.00  | 26.44   |
| 15D10156                    | 9.4 %  | 253-14 | Groundmass | Kerguelen Plateau | Dan Miggins | 9.4  | FCT-NM (7B20-14) | 28.201           | 0.082 | Kuiper et al (2008) | 8.76608            | 0.117 | 0.00179298 | 0.117 | 303.409       | 0.117 | 0.993474796 | 0.065 | 1            | 4.8E-14                | 1   | APR   | 2015 | 19   | 23  | 1      | 14-OSU-07   | 0.00  | 0.00  | 26.44   |
| 15D10158                    | 10.5 % | 253-14 | Groundmass | Kerguelen Plateau | Dan Miggins | 10.5 | FCT-NM (7B20-14) | 28.201           | 0.082 | Kuiper et al (2008) | 8.76608            | 0.117 | 0.00179298 | 0.117 | 303.409       | 0.117 | 0.993474796 | 0.065 | 1            | 4.8E-14                | 1   | APR   | 2015 | 19   | 48  | 1      | 14-OSU-07   | 0.00  | 0.00  | 26.44   |
| 15D10159                    | 11.7 % | 253-14 | Groundmass | Kerguelen Plateau | Dan Miggins | 11.7 | FCT-NM (7B20-14) | 28.201           | 0.082 | Kuiper et al (2008) | 8.76608            | 0.117 | 0.00179298 | 0.117 | 303.409       | 0.117 | 0.993474796 | 0.065 | 1            | 4.8E-14                | 1   | APR   | 2015 | 20   | 1   | 1      | 14-OSU-07   | 0.00  | 0.00  | 26.44   |
| 15D10160                    | 13.1 % | 253-14 | Groundmass | Kerguelen Plateau | Dan Miggins | 13.1 | FCT-NM (7B20-14) | 28.201           | 0.082 | Kuiper et al (2008) | 8.76608            | 0.117 | 0.00179298 | 0.117 | 303.409       | 0.117 | 0.993474796 | 0.065 | 1            | 4.8E-14                | 1   | APR   | 2015 | 20   | 13  | 1      | 14-OSU-07   | 0.00  | 0.00  | 26.44   |
| 15D10162                    | 14.7 % | 253-14 | Groundmass | Kerguelen Plateau | Dan Miggins | 14.7 | FCT-NM (7B20-14) | 28.201           | 0.082 | Kuiper et al (2008) | 8.76608            | 0.117 | 0.00179298 | 0.117 | 303.409       | 0.117 | 0.993474796 | 0.065 | 1            | 4.8E-14                | 1   | APR   | 2015 | 20   | 38  | 1      | 14-OSU-07   | 0.00  | 0.00  | 26.44   |
| 15D10163                    | 16.5 % | 253-14 | Groundmass | Kerguelen Plateau | Dan Miggins | 16.5 | FCT-NM (7B20-14) | 28.201           | 0.082 | Kuiper et al (2008) | 8.76608            | 0.117 | 0.00179298 | 0.117 | 303.409       | 0.117 | 0.993474796 | 0.065 | 1            | 4.8E-14                | 1   | APR   | 2015 | 20   | 51  | 1      | 14-OSU-07   | 0.00  | 0.00  | 26.44   |
| 15D10164                    | 18.5 % | 253-14 | Groundmass | Kerguelen Plateau | Dan Miggins | 18.5 | FCT-NM (7B20-14) | 28.201           | 0.082 | Kuiper et al (2008) | 8.76608            | 0.117 | 0.00179298 | 0.117 | 303.409       | 0.117 | 0.993474796 | 0.065 | 1            | 4.8E-14                | 1   | APR   | 2015 | 21   | 4   | 1      | 14-OSU-07   | 0.00  | 0.00  | 26.44   |
| 15D10166                    | 19.8 % | 253-14 | Groundmass | Kerguelen Plateau | Dan Miggins | 19.8 | FCT-NM (7B20-14) | 28.201           | 0.082 | Kuiper et al (2008) | 8.76608            | 0.117 | 0.00179298 | 0.117 | 303.409       | 0.117 | 0.993474796 | 0.065 | 1            | 4.8E-14                | 1   | APR   | 2015 | 21   | 29  | 1      | 14-OSU-07   | 0.00  | 0.00  | 26.44   |
| 15D10167                    | 21.7 % | 253-14 | Groundmass | Kerguelen Plateau | Dan Miggins | 21.7 | FCT-NM (7B20-14) | 28.201           | 0.082 | Kuiper et al (2008) | 8.76608            | 0.117 | 0.00179298 | 0.117 | 303.409       | 0.117 | 0.993474796 | 0.065 | 1            | 4.8E-14                | 1   | APR   | 2015 | 21   | 42  | 1      | 14-OSU-07   | 0.00  | 0.00  | 26.44   |
| 15D10168                    | 22.8 % | 253-14 | Groundmass | Kerguelen Plateau | Dan Miggins | 22.8 | FCT-NM (7B20-14) | 28.201           | 0.082 | Kuiper et al (2008) | 8.76608            | 0.117 | 0.00179298 | 0.117 | 303.409       | 0.117 | 0.993474796 | 0.065 | 1            | 4.8E-14                | 1   | APR   | 2015 | 21   | 55  | 1      | 14-OSU-07   | 0.00  | 0.00  | 26.44   |
| 15D10170                    | 24.3 % | 253-14 | Groundmass | Kerguelen Plateau | Dan Miggins | 24.3 | FCT-NM (7B20-14) | 28.201           | 0.082 | Kuiper et al (2008) | 8.76608            | 0.117 | 0.00179298 | 0.117 | 303.409       | 0.117 | 0.993474796 | 0.065 | 1            | 4.8E-14                | 1   | APR   | 2015 | 22   | 21  | 1      | 14-OSU-07   | 0.00  | 0.00  | 26.44   |



[illegible]







15D10129.AGE >>> 253-14 >>> KERGUELEN | FALLOON (14-PIL-01) PROJECT

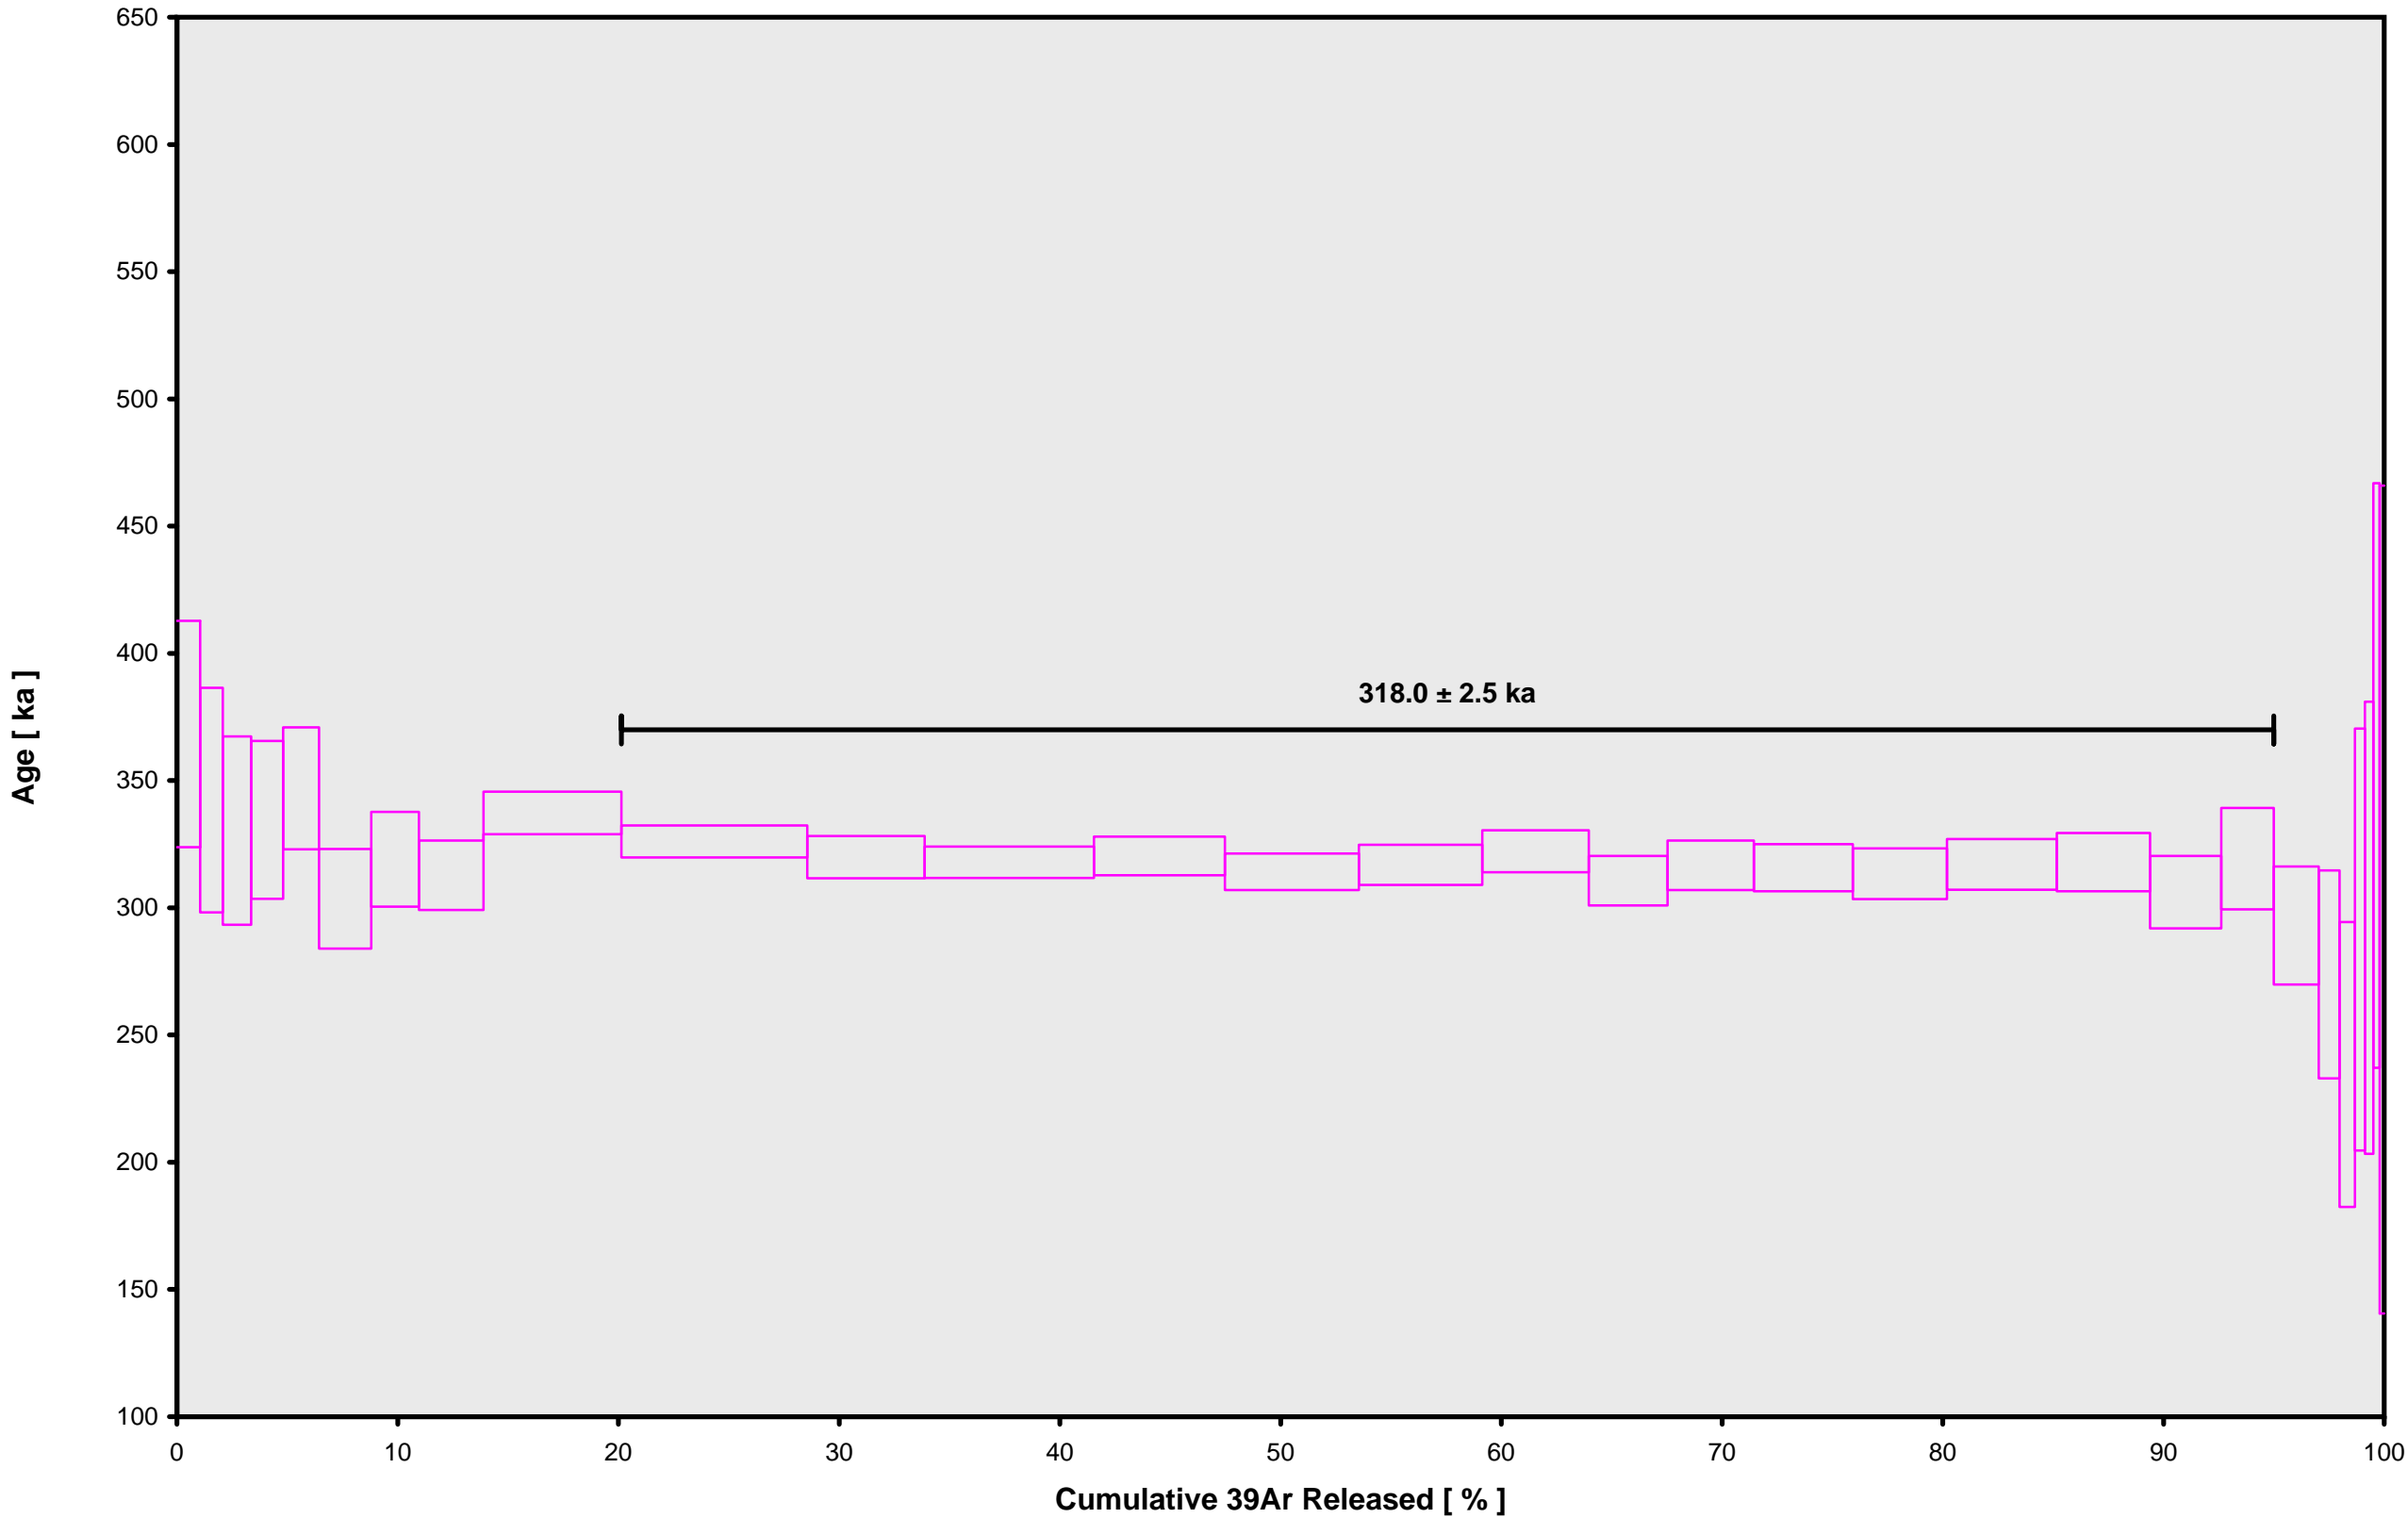

Ar-Ages in ka

WEIGHTED PLATEAU

$318.0 \pm 2.5$

TOTAL FUSION

$318.5 \pm 2.5$

NORMAL ISOCHRON

$320.5 \pm 6.7$

INVERSE ISOCHRON

$320.6 \pm 6.7$

MSWD (PROBABILITY)

1.12 (34%)

Sample Info

Groundmass

Kerguelen Plateau

Dan Miggins

IRR = 14-OSU-07 (7B20-14)

J =  $0.00179298 \pm 0.00000210$



15D10129.AGE >>> 253-14 >>> KERGUELEN | FALLOON (14-PIL-01) PROJECT

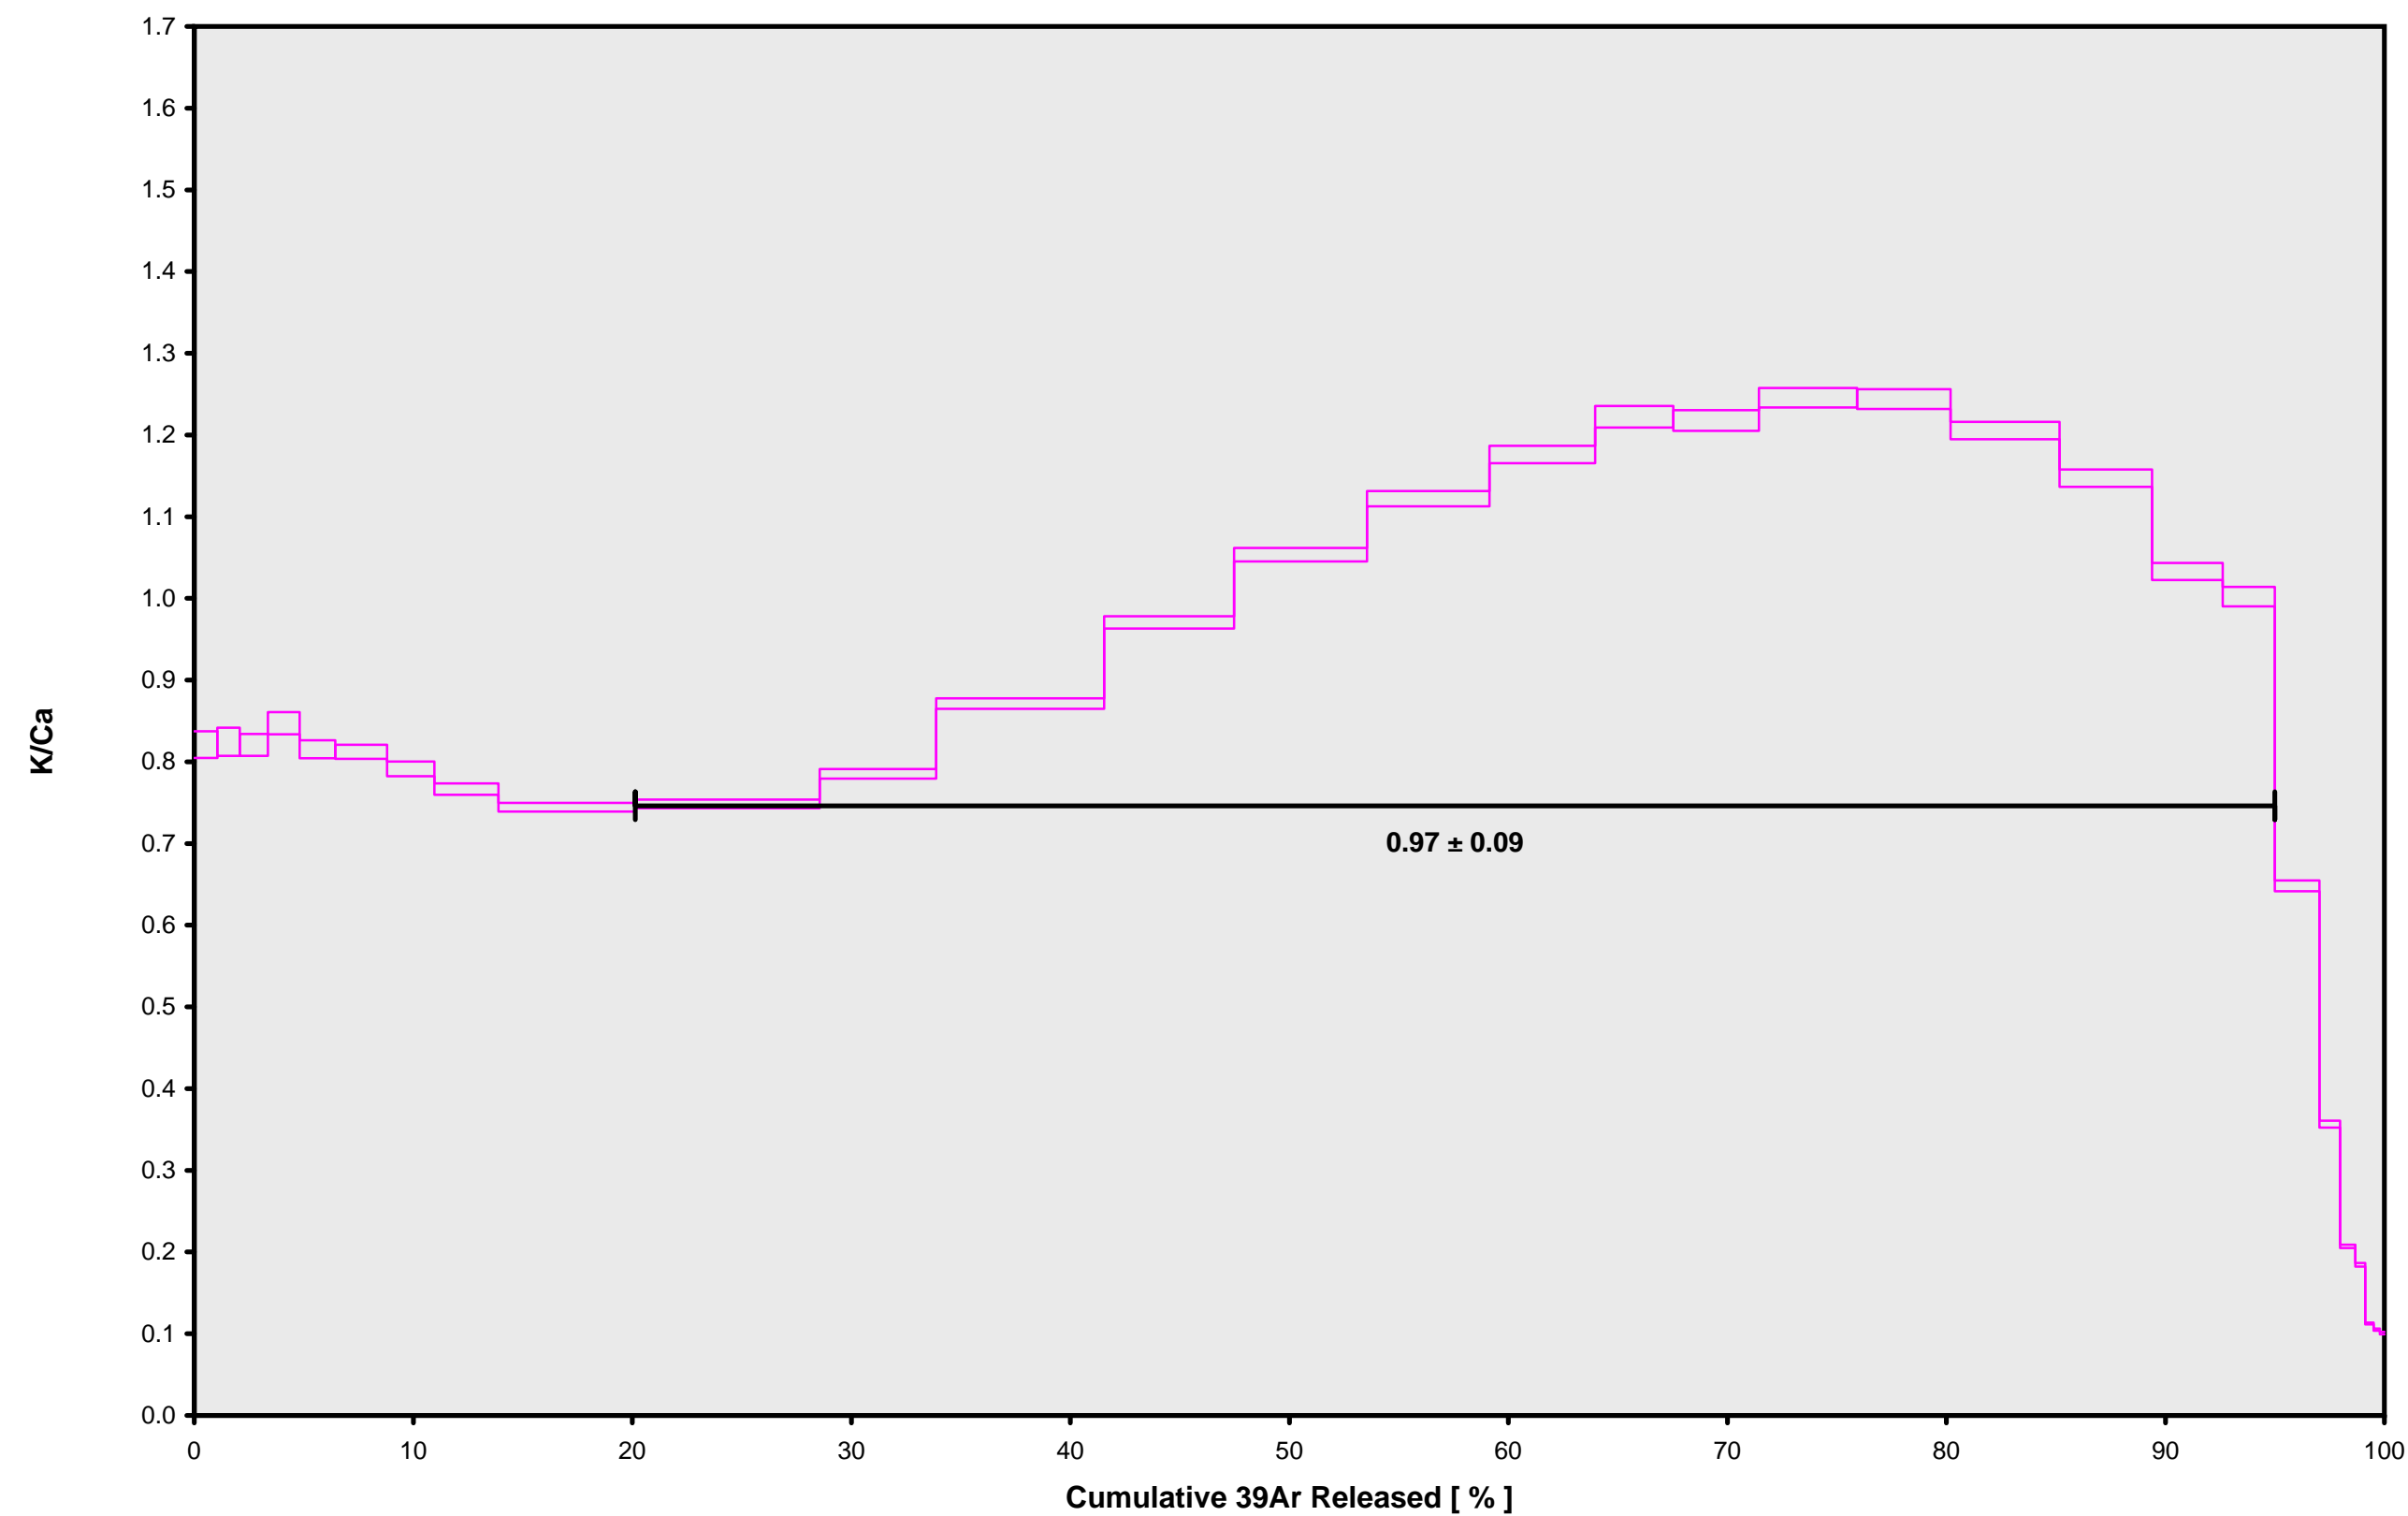

**Ar-Ages in ka**

**WEIGHTED PLATEAU**

**$318.0 \pm 2.5$**

**TOTAL FUSION**

**$318.5 \pm 2.5$**

**NORMAL ISOCHRON**

**$320.5 \pm 6.7$**

**INVERSE ISOCHRON**

**$320.6 \pm 6.7$**

**Sample Info**

**Groundmass**

**Kerguelen Plateau**

**Dan Miggins**

**IRR = 14-OSU-07 (7B20-14)**

**$J = 0.00179298 \pm 0.00000210$**



15D10129.AGE >>> 253-14 >>> KERGUELEN | FALLOON (14-PIL-01) PROJECT

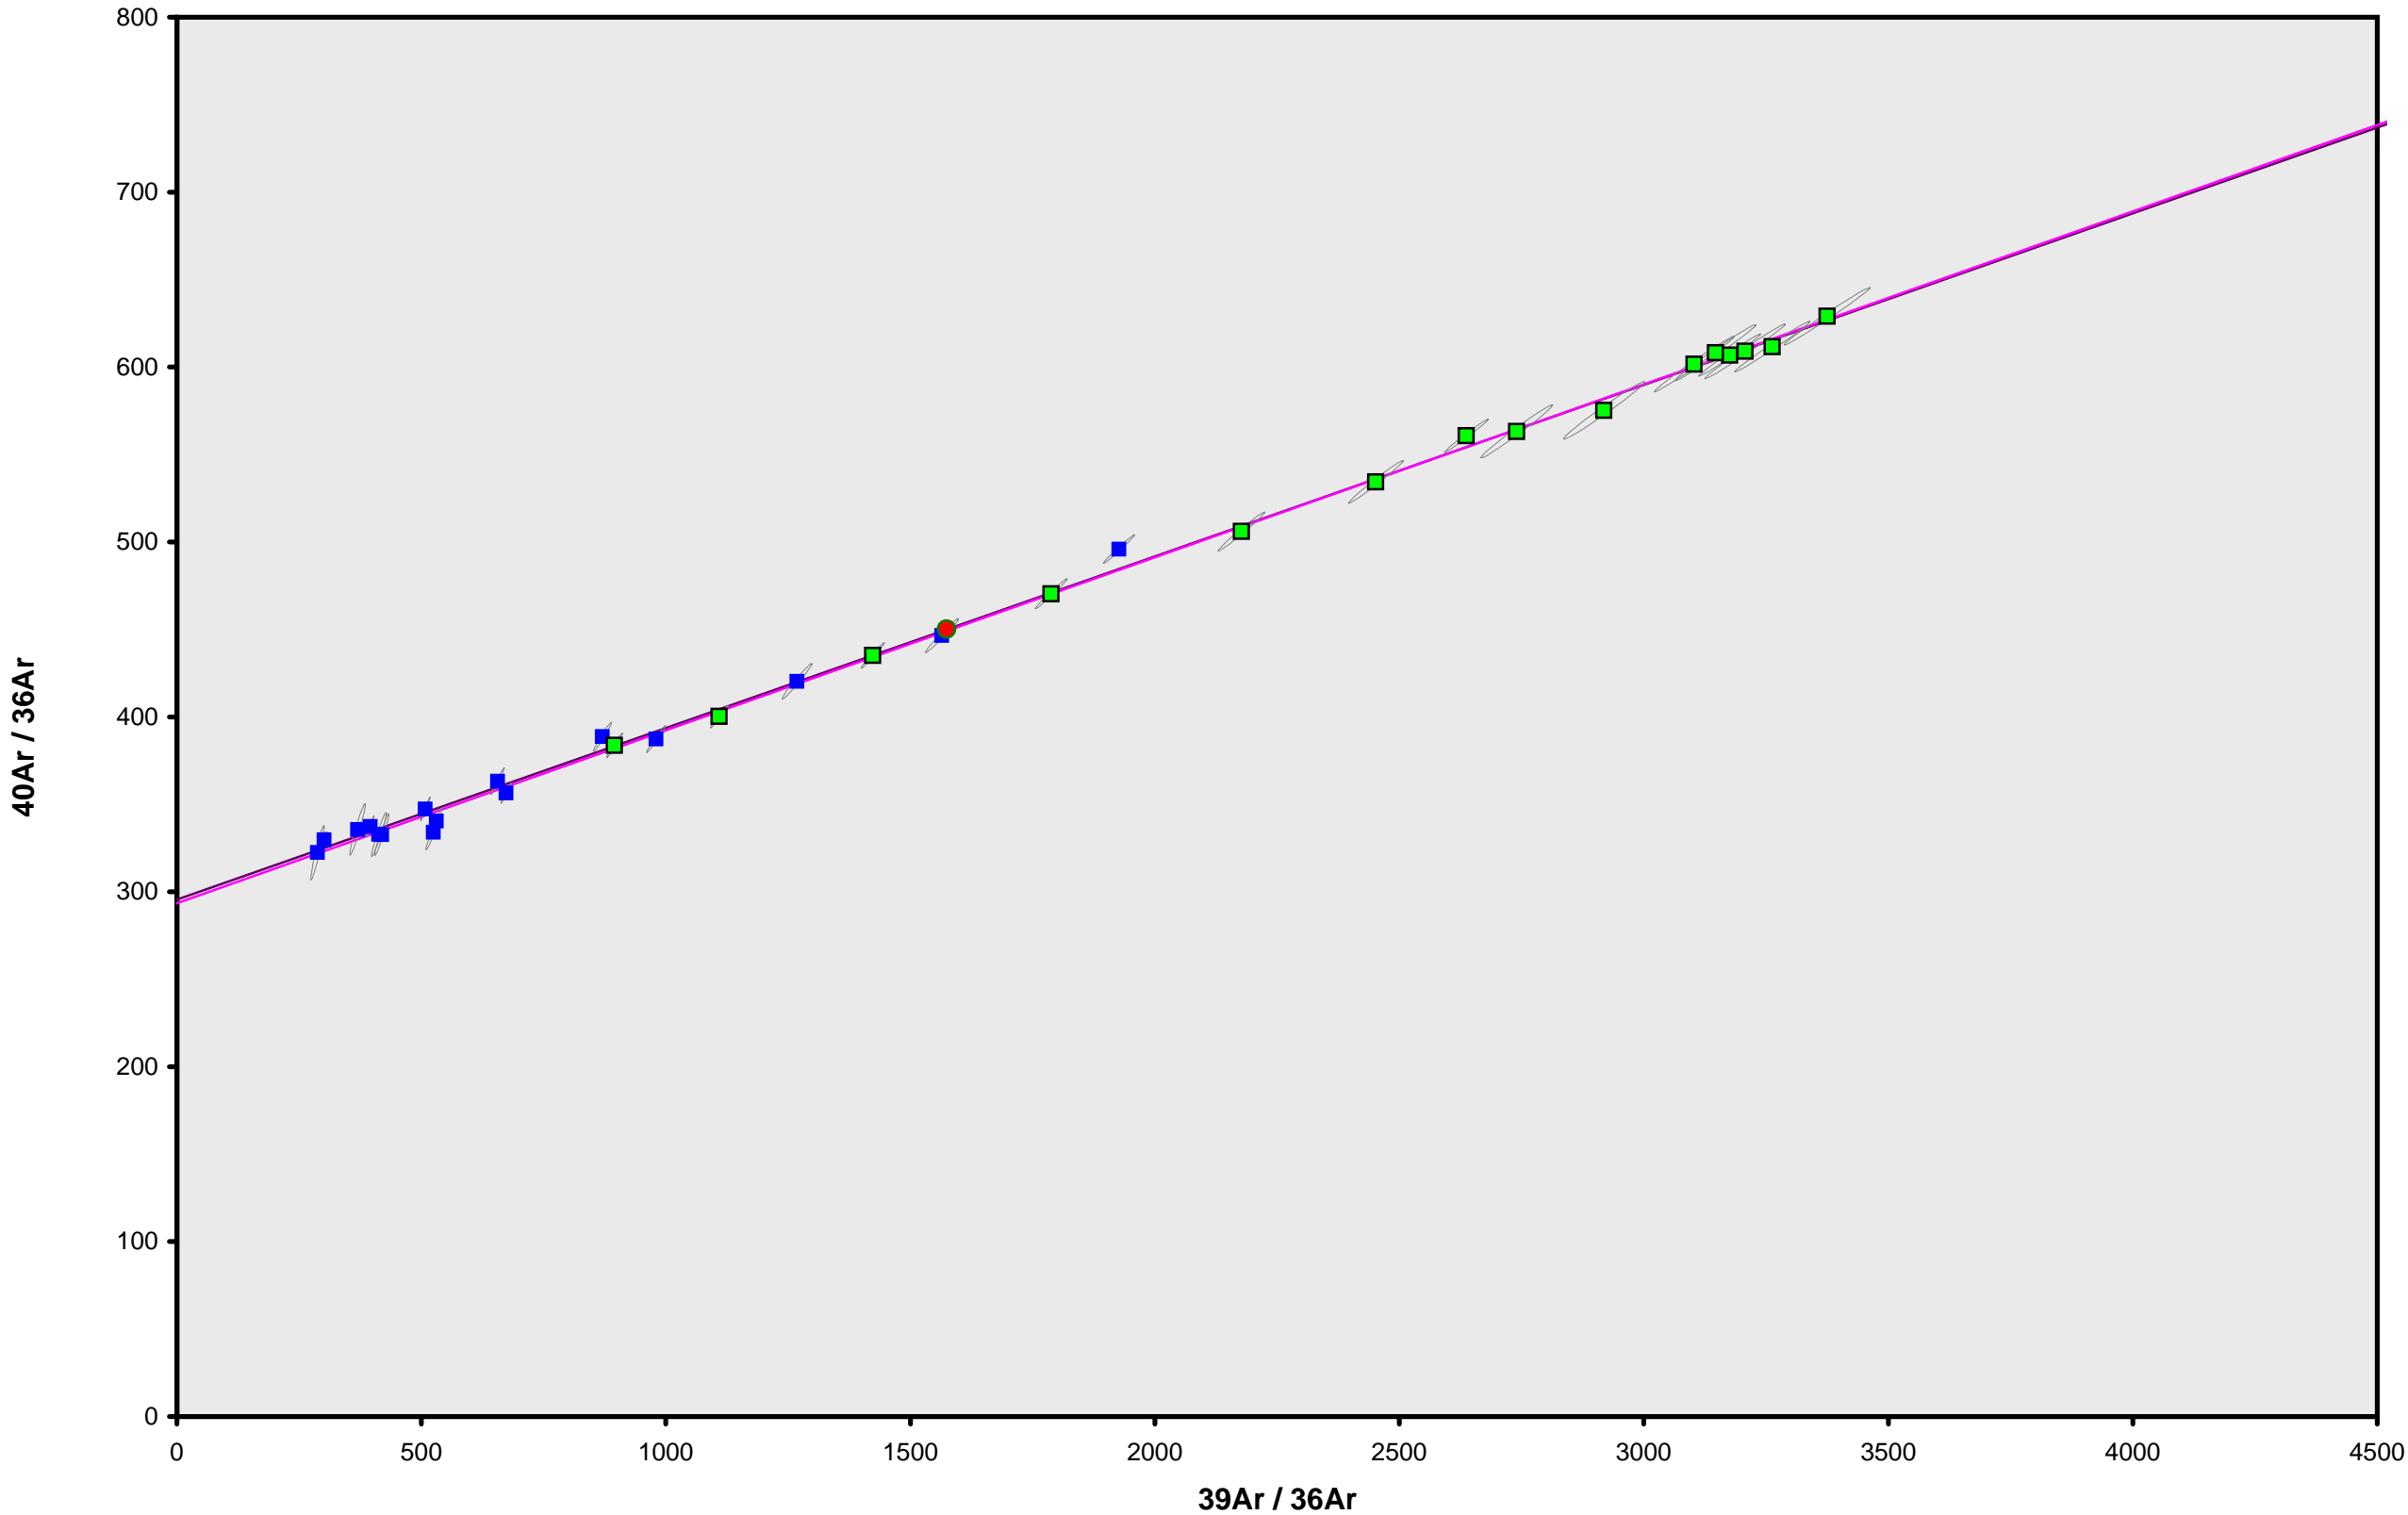

Ar-Ages in ka

WEIGHTED PLATEAU

$318.0 \pm 2.5$

TOTAL FUSION

$318.5 \pm 2.5$

NORMAL ISOCHRON

$320.5 \pm 6.7$

INVERSE ISOCHRON

$320.6 \pm 6.7$

MSWD (PROBABILITY)

1.13 (32%)

40AR/36AR INTERCEPT

$293.4 \pm 4.9$

Sample Info

Groundmass

Kerguelen Plateau

Dan Miggins

IRR = 14-OSU-07 (7B20-14)

J =  $0.00179298 \pm 0.00000210$



15D10129.AGE >>> 253-14 >>> KERGUELEN | FALLOON (14-PIL-01) PROJECT

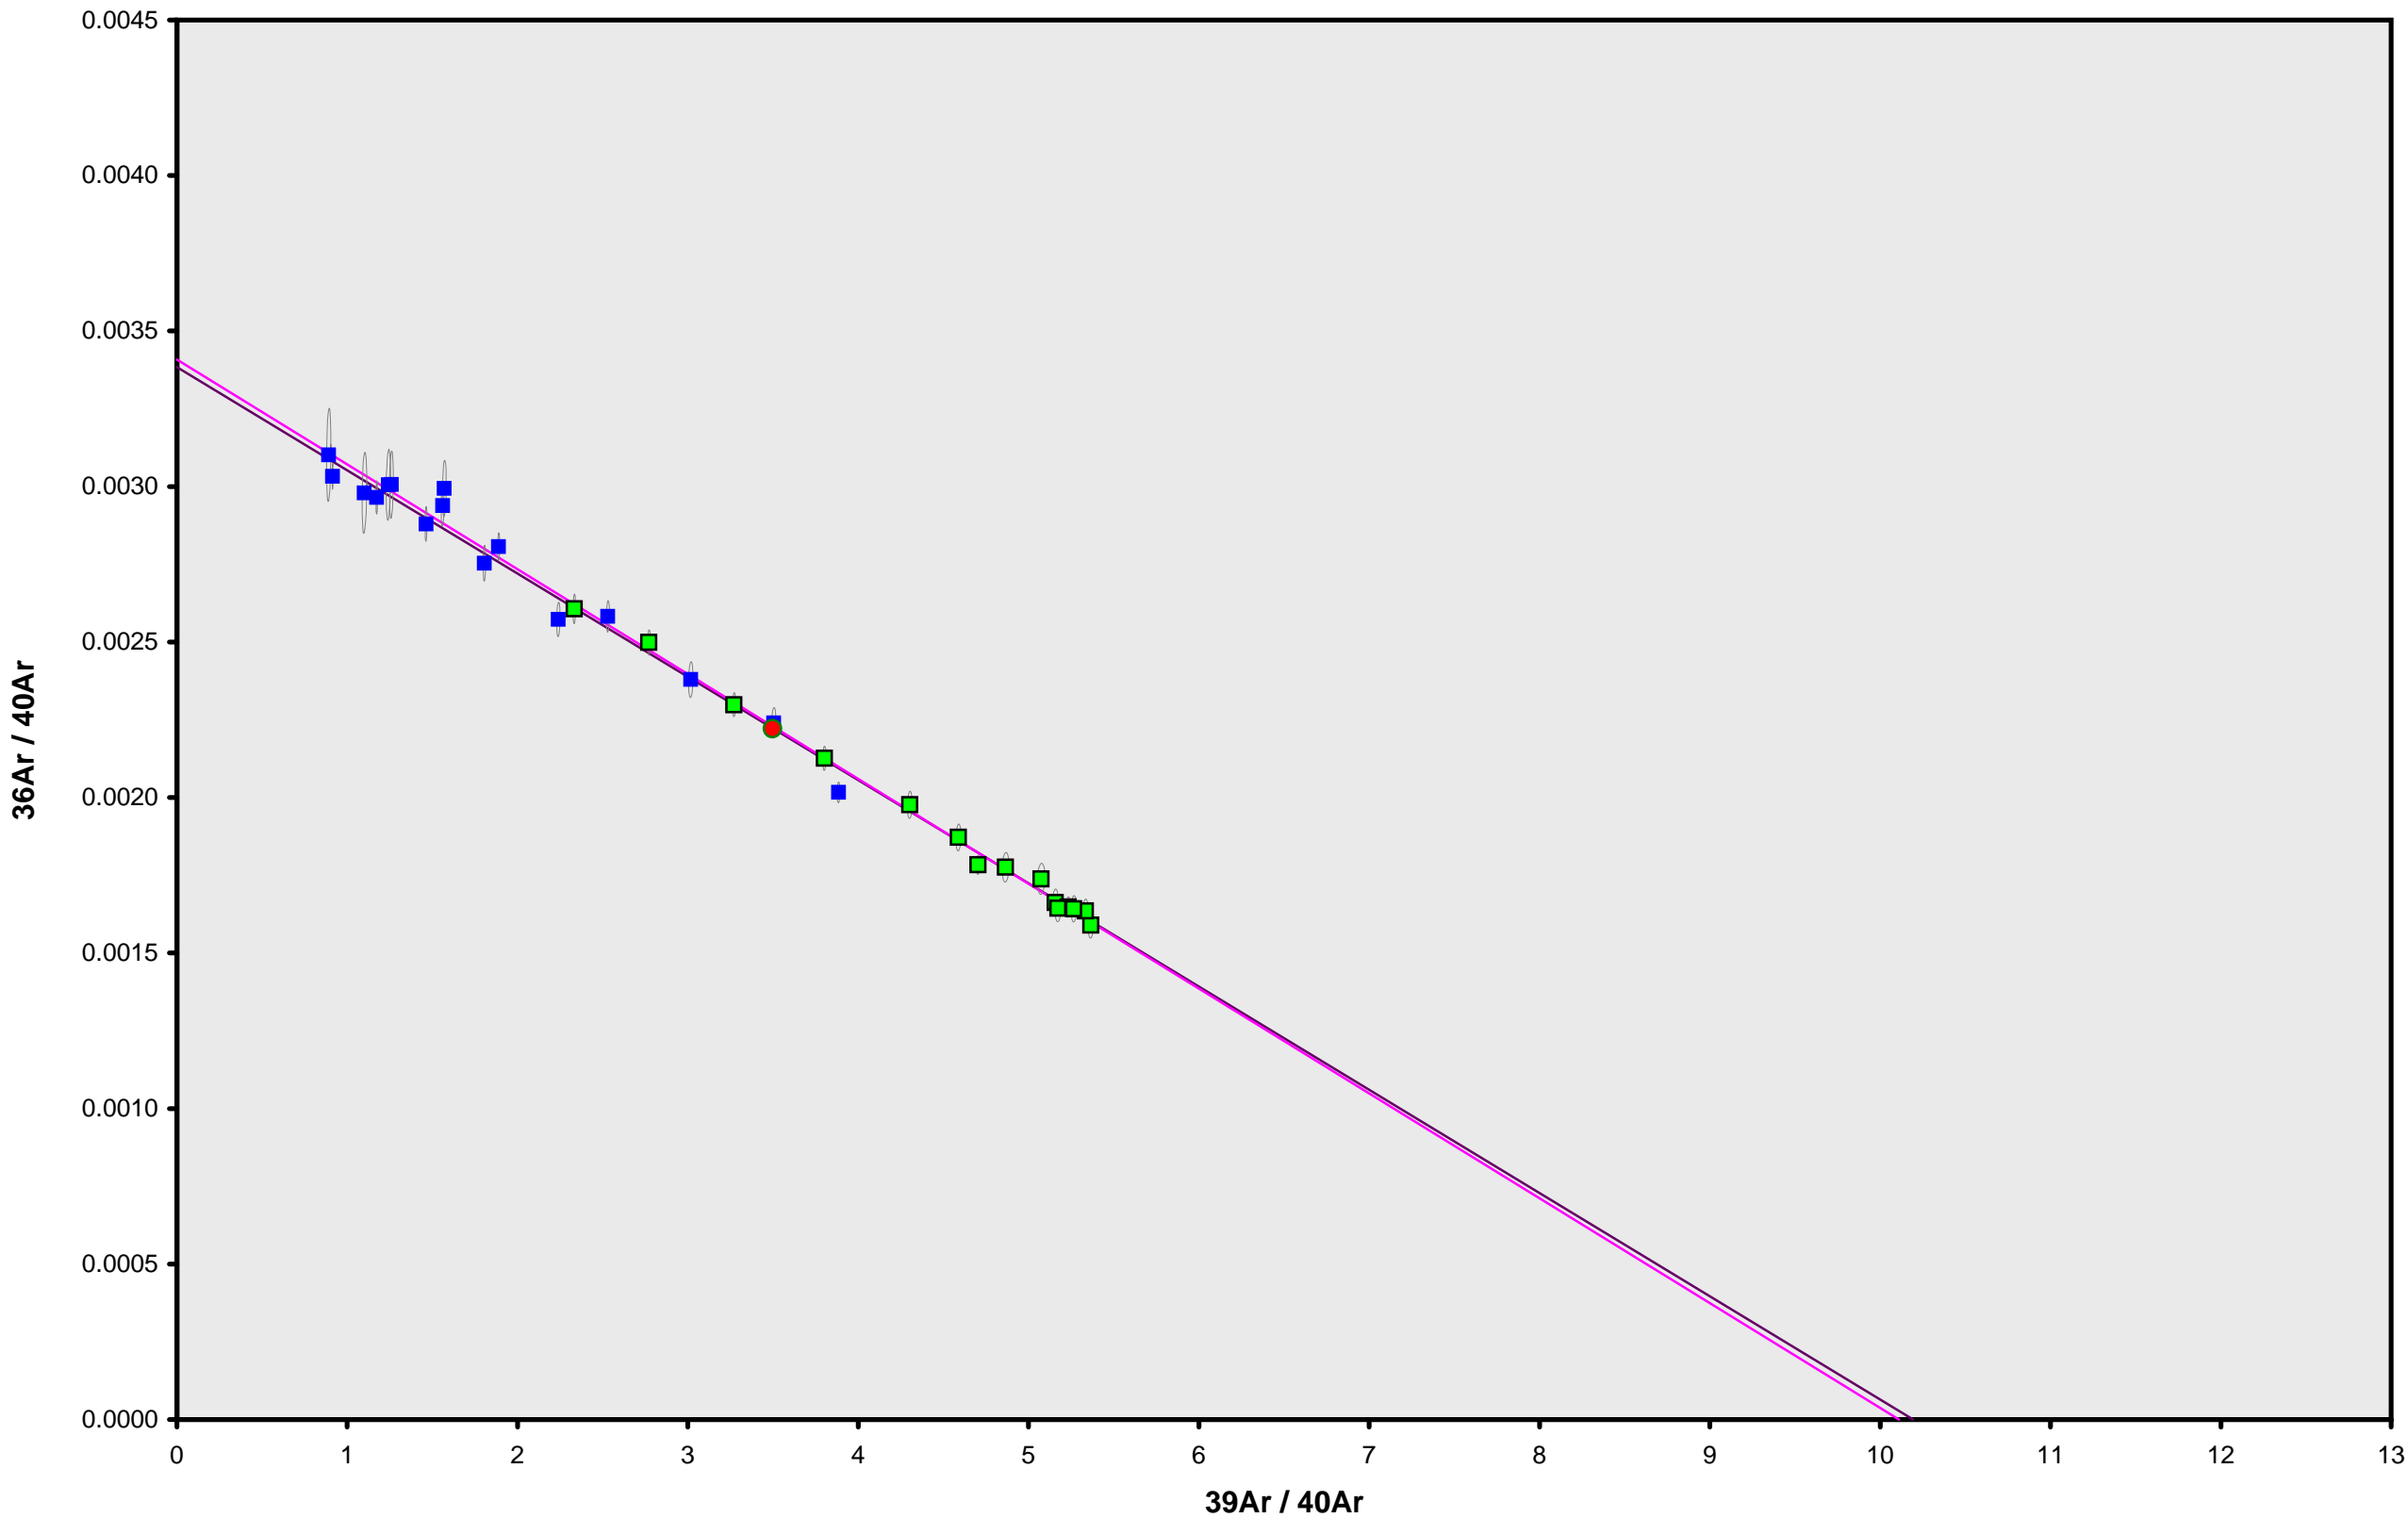

Ar-Ages in ka

WEIGHTED PLATEAU

$318.0 \pm 2.5$

TOTAL FUSION

$318.5 \pm 2.5$

NORMAL ISOCHRON

$320.5 \pm 6.7$

INVERSE ISOCHRON

$320.6 \pm 6.7$

MSWD (PROBABILITY)

1.14 (32%)

SPREADING FACTOR

30.0%

40AR/36AR INTERCEPT

$293.4 \pm 4.9$

Sample Info

Groundmass

Kerguelen Plateau

Dan Miggins

IRR = 14-OSU-07 (7B20-14)

J =  $0.00179298 \pm 0.00000210$



| Incremental Heating |        | 36Ar(a)<br>[fA] | 37Ar(ca)<br>[fA] | 38Ar(cl)<br>[fA] | 39Ar(k)<br>[fA] | 40Ar(r)<br>[fA] | Age ± 2σ<br>(Ma) | 40Ar(r)<br>(%) | 39Ar(k)<br>(%) | K/Ca ± 2σ   |
|---------------------|--------|-----------------|------------------|------------------|-----------------|-----------------|------------------|----------------|----------------|-------------|
| 15D10088            | 2.0 %  | 0.1728543       | 96.9540          | 1.9140395        | 181.7484        | 99.5507         | 1.76 ± 0.02      | 66.01          | 4.05           | 0.81 ± 0.01 |
| 15D10090            | 2.2 %  | ✓ 0.1195428     | 102.1784         | 1.3677530        | 187.1453        | 98.2901         | 1.69 ± 0.01      | 73.46          | 4.17           | 0.79 ± 0.01 |
| 15D10091            | 2.4 %  | ✓ 0.0764198     | 85.1347          | 0.7904124        | 151.0948        | 79.0540         | 1.68 ± 0.01      | 77.66          | 3.37           | 0.76 ± 0.01 |
| 15D10092            | 2.6 %  | ✓ 0.0764445     | 112.4153         | 0.7182838        | 198.0226        | 103.7342        | 1.69 ± 0.01      | 81.99          | 4.42           | 0.76 ± 0.01 |
| 15D10094            | 2.8 %  | ✓ 0.0624908     | 115.7113         | 0.5739129        | 198.5068        | 103.9542        | 1.69 ± 0.01      | 84.78          | 4.43           | 0.74 ± 0.01 |
| 15D10095            | 3.0 %  | ✓ 0.0449630     | 96.4702          | 0.3648076        | 166.4190        | 87.3808         | 1.69 ± 0.01      | 86.66          | 3.71           | 0.74 ± 0.01 |
| 15D10096            | 3.3 %  | ✓ 0.0536430     | 135.9514         | 0.4021361        | 236.8147        | 123.6205        | 1.68 ± 0.01      | 88.48          | 5.28           | 0.75 ± 0.01 |
| 15D10097            | 3.6 %  | ✓ 0.0390790     | 112.9255         | 0.1900243        | 199.7259        | 104.1776        | 1.68 ± 0.01      | 89.86          | 4.46           | 0.76 ± 0.01 |
| 15D10099            | 3.9 %  | ✓ 0.0398890     | 124.4899         | 0.2508257        | 228.5862        | 118.9337        | 1.68 ± 0.01      | 90.82          | 5.10           | 0.79 ± 0.01 |
| 15D10100            | 4.3 %  | ✓ 0.0403969     | 134.2231         | 0.2404202        | 259.0330        | 135.2565        | 1.68 ± 0.01      | 91.73          | 5.78           | 0.83 ± 0.01 |
| 15D10101            | 4.6 %  | ✓ 0.0402607     | 129.3767         | 0.2321280        | 263.3558        | 136.9044        | 1.67 ± 0.01      | 91.84          | 5.87           | 0.88 ± 0.01 |
| 15D10102            | 4.9 %  | ✓ 0.0395318     | 128.0949         | 0.1852347        | 270.9157        | 140.7385        | 1.67 ± 0.01      | 92.17          | 6.04           | 0.91 ± 0.01 |
| 15D10104            | 5.2 %  | ✓ 0.0455231     | 138.8732         | 0.2190651        | 300.6074        | 155.7881        | 1.67 ± 0.01      | 91.89          | 6.71           | 0.93 ± 0.01 |
| 15D10105            | 5.5 %  | ✓ 0.0278995     | 83.5109          | 0.1225381        | 182.7708        | 94.6638         | 1.67 ± 0.01      | 91.82          | 4.08           | 0.94 ± 0.01 |
| 15D10106            | 5.8 %  | ✓ 0.0266064     | 78.5047          | 0.1505043        | 172.3371        | 89.4757         | 1.67 ± 0.01      | 91.76          | 3.84           | 0.94 ± 0.01 |
| 15D10108            | 6.1 %  | ✓ 0.0334998     | 96.7647          | 0.1593002        | 207.2724        | 107.5623        | 1.67 ± 0.01      | 91.41          | 4.62           | 0.92 ± 0.01 |
| 15D10109            | 6.5 %  | ✓ 0.0228921     | 61.6931          | 0.0944651        | 131.6949        | 68.4303         | 1.67 ± 0.01      | 90.84          | 2.94           | 0.92 ± 0.01 |
| 15D10110            | 7.0 %  | 0.0367368       | 90.1765          | 0.1306995        | 184.5080        | 94.9749         | 1.66 ± 0.01      | 89.58          | 4.12           | 0.88 ± 0.01 |
| 15D10112            | 7.6 %  | 0.0385276       | 79.3321          | 0.1093574        | 159.6806        | 81.3630         | 1.64 ± 0.01      | 87.57          | 3.56           | 0.87 ± 0.01 |
| 15D10113            | 8.4 %  | 0.0262391       | 50.9462          | 0.1000374        | 98.3470         | 50.1386         | 1.64 ± 0.01      | 86.46          | 2.19           | 0.83 ± 0.01 |
| 15D10114            | 9.4 %  | 0.0515962       | 94.3092          | 0.2122695        | 148.9204        | 73.8345         | 1.60 ± 0.01      | 82.74          | 3.32           | 0.68 ± 0.01 |
| 15D10116            | 10.5 % | 0.0368497       | 61.0439          | 0.1619464        | 91.7247         | 45.0068         | 1.58 ± 0.02      | 80.39          | 2.05           | 0.65 ± 0.01 |
| 15D10117            | 11.7 % | 0.0319920       | 50.9337          | 0.1452180        | 72.5329         | 35.5282         | 1.58 ± 0.02      | 78.86          | 1.62           | 0.61 ± 0.01 |
| 15D10118            | 13.1 % | 0.0344416       | 58.5101          | 0.0771558        | 63.3389         | 29.5286         | 1.50 ± 0.02      | 74.25          | 1.41           | 0.47 ± 0.01 |
| 15D10120            | 14.7 % | 0.0257829       | 54.2710          | 0.1147154        | 34.9981         | 14.6784         | 1.35 ± 0.04      | 65.73          | 0.78           | 0.28 ± 0.00 |
| 15D10121            | 16.5 % | 0.0227344       | 62.9205          | 0.0761165        | 26.3831         | 9.9483          | 1.21 ± 0.05      | 59.60          | 0.59           | 0.18 ± 0.00 |
| 15D10122            | 18.5 % | 0.0237086       | 94.9295          | 0.1028219        | 23.4035         | 7.9127          | 1.09 ± 0.06      | 52.96          | 0.52           | 0.11 ± 0.00 |
| 15D10124            | 19.8 % | 0.0188555       | 86.4819          | 0.0481333        | 15.4597         | 5.2910          | 1.10 ± 0.09      | 48.64          | 0.34           | 0.08 ± 0.00 |
| 15D10125            | 21.7 % | 0.0170682       | 99.2521          | 0.0799614        | 12.6120         | 4.1643          | 1.06 ± 0.13      | 45.16          | 0.28           | 0.05 ± 0.00 |
| 15D10126            | 22.8 % | 0.0157019       | 69.3740          | 0.0576873        | 9.0163          | 2.8995          | 1.04 ± 0.16      | 38.41          | 0.20           | 0.06 ± 0.00 |
| 15D10128            | 24.3 % | 0.0133585       | 48.0498          | 0.0058234        | 6.1122          | 1.8821          | 0.99 ± 0.22      | 32.25          | 0.14           | 0.05 ± 0.00 |
| Σ                   |        | 1.3555293       | 2833.8025        | 9.3977943        | 4483.0883       | 2304.6663       |                  |                |                |             |

| Information on Analysis             | Results                   | 40(r)/39(k) ± 2σ          | Age ± 2σ<br>(Ma)    | MSWD           | 39Ar(k)<br>(%,n)                           | K/Ca ± 2σ   |
|-------------------------------------|---------------------------|---------------------------|---------------------|----------------|--------------------------------------------|-------------|
| Sample = 1180044-1A                 | Age Plateau<br>Error Mean | 0.52083 ± 0.00110 ± 0.21% | 1.68 ± 0.01 ± 0.31% | 2.81<br>0%     | 74.82<br>16                                | 0.82 ± 0.04 |
| Material = Groundmass               |                           |                           |                     |                |                                            |             |
| Location = Kerguelen Plateau        |                           |                           |                     |                |                                            |             |
| Analyst = Dan Miggins               | Total Fusion Age          | 0.51408 ± 0.00067 ± 0.13% | 1.66 ± 0.00 ± 0.27% | 1.73<br>1.6750 | 2σ Confidence Limit<br>Error Magnification |             |
| Project = KERGUELEN   FALLOON (14-I |                           |                           |                     |                |                                            |             |
| Mass Discrimination Law = LIN       |                           |                           |                     |                |                                            |             |
| Irradiation = 14-OSU-07 (7B22-14)   |                           |                           |                     |                |                                            |             |
| J = 0.00178150 ± 0.00000207         |                           |                           |                     |                |                                            |             |
| FCT-NM = 28.201 ± 0.023 Ma          |                           |                           |                     |                |                                            |             |



| Normal Isochron |        |   | 39(k)/36(a) ± 2σ | 40(a+r)/36(a) ± 2σ | r.i.   |
|-----------------|--------|---|------------------|--------------------|--------|
| 15D10088        | 2.0 %  |   | 1051.45 ± 17.09  | 871.42 ± 14.14     | 0.9937 |
| 15D10090        | 2.2 %  | ✓ | 1565.51 ± 30.02  | 1117.72 ± 21.43    | 0.9951 |
| 15D10091        | 2.4 %  | ✓ | 1977.17 ± 49.85  | 1329.97 ± 33.55    | 0.9962 |
| 15D10092        | 2.6 %  | ✓ | 2590.41 ± 66.37  | 1652.49 ± 42.33    | 0.9972 |
| 15D10094        | 2.8 %  | ✓ | 3176.57 ± 85.05  | 1959.01 ± 52.45    | 0.9973 |
| 15D10095        | 3.0 %  | ✓ | 3701.24 ± 132.59 | 2238.89 ± 80.23    | 0.9982 |
| 15D10096        | 3.3 %  | ✓ | 4414.64 ± 145.54 | 2600.00 ± 85.70    | 0.9985 |
| 15D10097        | 3.6 %  | ✓ | 5110.83 ± 224.21 | 2961.32 ± 129.92   | 0.9990 |
| 15D10099        | 3.9 %  | ✓ | 5730.56 ± 253.50 | 3277.12 ± 144.96   | 0.9991 |
| 15D10100        | 4.3 %  | ✓ | 6412.20 ± 268.05 | 3643.69 ± 152.30   | 0.9991 |
| 15D10101        | 4.6 %  | ✓ | 6541.27 ± 264.34 | 3695.95 ± 149.34   | 0.9990 |
| 15D10102        | 4.9 %  | ✓ | 6853.11 ± 293.89 | 3855.63 ± 165.33   | 0.9992 |
| 15D10104        | 5.2 %  | ✓ | 6603.40 ± 270.30 | 3717.67 ± 152.15   | 0.9992 |
| 15D10105        | 5.5 %  | ✓ | 6551.05 ± 379.85 | 3688.53 ± 213.90   | 0.9993 |
| 15D10106        | 5.8 %  | ✓ | 6477.29 ± 362.42 | 3658.44 ± 204.73   | 0.9992 |
| 15D10108        | 6.1 %  | ✓ | 6187.28 ± 309.97 | 3506.33 ± 175.67   | 0.9992 |
| 15D10109        | 6.5 %  | ✓ | 5752.85 ± 381.86 | 3284.75 ± 218.11   | 0.9992 |
| 15D10110        | 7.0 %  |   | 5022.43 ± 234.63 | 2880.78 ± 134.60   | 0.9990 |
| 15D10112        | 7.6 %  |   | 4144.58 ± 173.17 | 2407.31 ± 100.62   | 0.9985 |
| 15D10113        | 8.4 %  |   | 3748.11 ± 202.40 | 2206.34 ± 119.26   | 0.9981 |
| 15D10114        | 9.4 %  |   | 2886.27 ± 95.33  | 1726.51 ± 57.07    | 0.9975 |
| 15D10116        | 10.5 % |   | 2489.16 ± 103.12 | 1516.86 ± 62.95    | 0.9968 |
| 15D10117        | 11.7 % |   | 2267.22 ± 108.94 | 1406.03 ± 67.72    | 0.9964 |
| 15D10118        | 13.1 % |   | 1839.02 ± 79.81  | 1152.85 ± 50.22    | 0.9945 |
| 15D10120        | 14.7 % |   | 1357.42 ± 75.55  | 864.81 ± 48.50     | 0.9903 |
| 15D10121        | 16.5 % |   | 1160.49 ± 68.61  | 733.09 ± 43.86     | 0.9853 |
| 15D10122        | 18.5 % |   | 987.13 ± 60.82   | 629.25 ± 39.31     | 0.9831 |
| 15D10124        | 19.8 % |   | 819.91 ± 61.33   | 576.11 ± 43.85     | 0.9787 |
| 15D10125        | 21.7 % |   | 738.92 ± 67.80   | 539.48 ± 50.34     | 0.9796 |
| 15D10126        | 22.8 % |   | 574.22 ± 51.35   | 480.16 ± 43.96     | 0.9677 |
| 15D10128        | 24.3 % |   | 457.55 ± 44.24   | 436.39 ± 43.65     | 0.9538 |

| Results         | 40(a)/36(a) ± 2σ                                                    | 40(r)/39(k) ± 2σ          | Age ± 2σ (Ma)                                          | MSWD                                    |
|-----------------|---------------------------------------------------------------------|---------------------------|--------------------------------------------------------|-----------------------------------------|
| Normal Isochron | 311.65 ± 6.95 ± 2.23%                                               | 0.51727 ± 0.00166 ± 0.32% | 1.67 ± 0.01 ± 0.40%                                    | 1.25 23%                                |
|                 |                                                                     |                           | Full External Error ± 0.04<br>Analytical Error ± 0.01  |                                         |
| Statistics      | 2σ Confidence Limit<br>Error Magnification<br>Number of Data Points | 1.76<br>1.1158<br>16      | Convergence<br>Number of Iterations<br>Calculated Line | 0.000005129014<br>65<br>Weighted York-2 |



| Inverse Isochron | 39(k)/40(a+r) ± 2σ |   |                       | 36(a)/40(a+r) ± 2σ      | r.i.   |
|------------------|--------------------|---|-----------------------|-------------------------|--------|
| 15D10088         | 2.0 %              |   | 1.2065953 ± 0.0022023 | 0.00114755 ± 0.00001862 | 0.0451 |
| 15D10090         | 2.2 %              | ✓ | 1.4006309 ± 0.0026542 | 0.00089468 ± 0.00001715 | 0.0457 |
| 15D10091         | 2.4 %              | ✓ | 1.4866261 ± 0.0032610 | 0.00075190 ± 0.00001897 | 0.0501 |
| 15D10092         | 2.6 %              | ✓ | 1.5675826 ± 0.0030177 | 0.00060515 ± 0.00001550 | 0.0366 |
| 15D10094         | 2.8 %              | ✓ | 1.6215188 ± 0.0031686 | 0.00051046 ± 0.00001367 | 0.0366 |
| 15D10095         | 3.0 %              | ✓ | 1.6531568 ± 0.0035983 | 0.00044665 ± 0.00001601 | 0.0359 |
| 15D10096         | 3.3 %              | ✓ | 1.6979373 ± 0.0031026 | 0.00038462 ± 0.00001268 | 0.0250 |
| 15D10097         | 3.6 %              | ✓ | 1.7258599 ± 0.0034538 | 0.00033769 ± 0.00001482 | 0.0240 |
| 15D10099         | 3.9 %              | ✓ | 1.7486577 ± 0.0033196 | 0.00030515 ± 0.00001350 | 0.0209 |
| 15D10100         | 4.3 %              | ✓ | 1.7598093 ± 0.0031138 | 0.00027445 ± 0.00001147 | 0.0177 |
| 15D10101         | 4.6 %              | ✓ | 1.7698475 ± 0.0031517 | 0.00027057 ± 0.00001093 | 0.0184 |
| 15D10102         | 4.9 %              | ✓ | 1.7774273 ± 0.0031344 | 0.00025936 ± 0.00001112 | 0.0173 |
| 15D10104         | 5.2 %              | ✓ | 1.7762179 ± 0.0029969 | 0.00026899 ± 0.00001101 | 0.0155 |
| 15D10105         | 5.5 %              | ✓ | 1.7760589 ± 0.0038462 | 0.00027111 ± 0.00001572 | 0.0218 |
| 15D10106         | 5.8 %              | ✓ | 1.7705040 ± 0.0039327 | 0.00027334 ± 0.00001530 | 0.0238 |
| 15D10108         | 6.1 %              | ✓ | 1.7645992 ± 0.0035187 | 0.00028520 ± 0.00001429 | 0.0207 |
| 15D10109         | 6.5 %              | ✓ | 1.7513790 ± 0.0046820 | 0.00030444 ± 0.00002021 | 0.0283 |
| 15D10110         | 7.0 %              |   | 1.7434280 ± 0.0036971 | 0.00034713 ± 0.00001622 | 0.0257 |
| 15D10112         | 7.6 %              |   | 1.7216631 ± 0.0039671 | 0.00041540 ± 0.00001736 | 0.0345 |
| 15D10113         | 8.4 %              |   | 1.6987943 ± 0.0055923 | 0.00045324 ± 0.00002450 | 0.0467 |
| 15D10114         | 9.4 %              |   | 1.6717385 ± 0.0039418 | 0.00057920 ± 0.00001914 | 0.0453 |
| 15D10116         | 10.5 %             |   | 1.6409913 ± 0.0054430 | 0.00065925 ± 0.00002736 | 0.0622 |
| 15D10117         | 11.7 %             |   | 1.6124938 ± 0.0066157 | 0.00071122 ± 0.00003426 | 0.0708 |
| 15D10118         | 13.1 %             |   | 1.5951916 ± 0.0072676 | 0.00086741 ± 0.00003779 | 0.0886 |
| 15D10120         | 14.7 %             |   | 1.5696203 ± 0.0122050 | 0.00115633 ± 0.00006485 | 0.1240 |
| 15D10121         | 16.5 %             |   | 1.5830249 ± 0.0161880 | 0.00136409 ± 0.00008162 | 0.1552 |
| 15D10122         | 18.5 %             |   | 1.5687482 ± 0.0179596 | 0.00158920 ± 0.00009929 | 0.1669 |
| 15D10124         | 19.8 %             |   | 1.4231728 ± 0.0222519 | 0.00173578 ± 0.00013212 | 0.1863 |
| 15D10125         | 21.7 %             |   | 1.3696875 ± 0.0256791 | 0.00185363 ± 0.00017297 | 0.1827 |
| 15D10126         | 22.8 %             |   | 1.1958921 ± 0.0276065 | 0.00208264 ± 0.00019069 | 0.2175 |
| 15D10128         | 24.3 %             |   | 1.0484802 ± 0.0315233 | 0.00229151 ± 0.00022921 | 0.2591 |

| Results          | 40(a)/36(a) ± 2σ      |        | 40(r)/39(k) ± 2σ                                      | Age ± 2σ (Ma)       | MSWD     |
|------------------|-----------------------|--------|-------------------------------------------------------|---------------------|----------|
| Inverse Isochron | 310.37 ± 6.99 ± 2.25% |        | 0.51768 ± 0.00166 ± 0.32%                             | 1.67 ± 0.01 ± 0.40% | 1.25 23% |
|                  |                       |        | Full External Error ± 0.04<br>Analytical Error ± 0.01 |                     |          |
| Statistics       | 2σ Confidence Limit   | 1.76   | Convergence                                           | 0.0001901700        |          |
|                  | Error Magnification   | 1.1181 | Number of Iterations                                  | 3                   |          |
|                  | Number of Data Points | 16     | Calculated Line                                       | Weighted York-2     |          |
|                  | Spreading Factor      | 19.5%  |                                                       |                     |          |



| OSU Argon Geochronology Lab |        |             |       |           |       |           |        |           |       |           |       |                   |               |             |             |             |
|-----------------------------|--------|-------------|-------|-----------|-------|-----------|--------|-----------|-------|-----------|-------|-------------------|---------------|-------------|-------------|-------------|
| Relative Abundances         |        | 36Ar [fA]   | %1σ   | 37Ar [fA] | %1σ   | 38Ar [fA] | %1σ    | 39Ar [fA] | %1σ   | 40Ar [fA] | %1σ   | 40(r)/39(k) ± 2σ  | Age ± 2σ (Ma) | 40Ar(r) (%) | 39Ar(k) (%) | K/Ca ± 2σ   |
| 15D10088                    | 2.0 %  | 0.1987317   | 0.702 | 96.9540   | 0.418 | 4.015991  | 1.238  | 181.8137  | 0.071 | 150.8127  | 0.058 | 0.54774 ± 0.00471 | 1.76 ± 0.02   | 66.01       | 4.05        | 0.81 ± 0.01 |
| 15D10090                    | 2.2 %  | ✓ 0.1467191 | 0.776 | 102.1784  | 0.408 | 3.521229  | 1.454  | 187.2140  | 0.069 | 133.8040  | 0.064 | 0.52521 ± 0.00380 | 1.69 ± 0.01   | 73.46       | 4.17        | 0.79 ± 0.01 |
| 15D10091                    | 2.4 %  | ✓ 0.0990116 | 0.966 | 85.1347   | 0.449 | 2.525338  | 1.917  | 151.1521  | 0.071 | 101.7887  | 0.083 | 0.52321 ± 0.00400 | 1.68 ± 0.01   | 77.66       | 3.37        | 0.76 ± 0.01 |
| 15D10092                    | 2.6 %  | ✓ 0.1062278 | 0.914 | 112.4153  | 0.400 | 2.987631  | 1.686  | 198.0983  | 0.069 | 126.5236  | 0.067 | 0.52385 ± 0.00313 | 1.69 ± 0.01   | 81.99       | 4.42        | 0.76 ± 0.01 |
| 15D10094                    | 2.8 %  | ✓ 0.0931231 | 0.888 | 115.7113  | 0.397 | 2.846208  | 1.732  | 198.5846  | 0.069 | 122.6208  | 0.069 | 0.52368 ± 0.00273 | 1.69 ± 0.01   | 84.78       | 4.43        | 0.74 ± 0.01 |
| 15D10095                    | 3.0 %  | ✓ 0.0704848 | 1.131 | 96.4702   | 0.426 | 2.268401  | 2.277  | 166.4839  | 0.070 | 100.8355  | 0.084 | 0.52507 ± 0.00312 | 1.69 ± 0.01   | 86.66       | 3.71        | 0.74 ± 0.01 |
| 15D10096                    | 3.3 %  | ✓ 0.0895934 | 0.974 | 135.9514  | 0.376 | 3.109003  | 1.634  | 236.9062  | 0.068 | 139.7112  | 0.061 | 0.52201 ± 0.00243 | 1.68 ± 0.01   | 88.48       | 5.28        | 0.75 ± 0.01 |
| 15D10097                    | 3.6 %  | ✓ 0.0689193 | 1.231 | 112.9255  | 0.399 | 2.471779  | 2.054  | 199.8019  | 0.069 | 115.9272  | 0.072 | 0.52160 ± 0.00277 | 1.68 ± 0.01   | 89.86       | 4.46        | 0.76 ± 0.01 |
| 15D10099                    | 3.9 %  | ✓ 0.0727912 | 1.199 | 124.4899  | 0.386 | 2.861322  | 1.742  | 228.6699  | 0.068 | 130.9518  | 0.066 | 0.52030 ± 0.00250 | 1.68 ± 0.01   | 90.82       | 5.10        | 0.79 ± 0.01 |
| 15D10100                    | 4.3 %  | ✓ 0.0758672 | 1.098 | 134.2231  | 0.376 | 3.197632  | 1.562  | 259.1233  | 0.068 | 147.4554  | 0.057 | 0.52216 ± 0.00215 | 1.68 ± 0.01   | 91.73       | 5.78        | 0.83 ± 0.01 |
| 15D10101                    | 4.6 %  | ✓ 0.0744503 | 1.078 | 129.3767  | 0.380 | 3.238440  | 1.521  | 263.4429  | 0.068 | 149.0674  | 0.057 | 0.51985 ± 0.00206 | 1.67 ± 0.01   | 91.84       | 5.87        | 0.88 ± 0.01 |
| 15D10102                    | 4.9 %  | ✓ 0.0733761 | 1.141 | 128.0949  | 0.380 | 3.277424  | 1.565  | 271.0019  | 0.067 | 152.6937  | 0.057 | 0.51949 ± 0.00208 | 1.67 ± 0.01   | 92.17       | 6.04        | 0.91 ± 0.01 |
| 15D10104                    | 5.2 %  | ✓ 0.0822179 | 1.120 | 138.8732  | 0.376 | 3.650416  | 1.367  | 300.7009  | 0.067 | 169.5438  | 0.052 | 0.51824 ± 0.00204 | 1.67 ± 0.01   | 91.89       | 6.71        | 0.93 ± 0.01 |
| 15D10105                    | 5.5 %  | ✓ 0.0499644 | 1.606 | 83.5109   | 0.443 | 2.208845  | 2.231  | 182.8270  | 0.070 | 103.0927  | 0.083 | 0.51794 ± 0.00287 | 1.67 ± 0.01   | 91.82       | 4.08        | 0.94 ± 0.01 |
| 15D10106                    | 5.8 %  | ✓ 0.0473538 | 1.559 | 78.5047   | 0.457 | 2.117764  | 2.424  | 172.3899  | 0.070 | 97.5119   | 0.086 | 0.51919 ± 0.00283 | 1.67 ± 0.01   | 91.76       | 3.84        | 0.94 ± 0.01 |
| 15D10108                    | 6.1 %  | ✓ 0.0590691 | 1.408 | 96.7647   | 0.425 | 2.525666  | 1.953  | 207.3375  | 0.069 | 117.6708  | 0.072 | 0.51894 ± 0.00263 | 1.67 ± 0.01   | 91.41       | 4.62        | 0.92 ± 0.01 |
| 15D10109                    | 6.5 %  | ✓ 0.0391930 | 1.926 | 61.6931   | 0.508 | 1.598289  | 3.148  | 131.7364  | 0.073 | 75.3280   | 0.112 | 0.51961 ± 0.00372 | 1.67 ± 0.01   | 90.84       | 2.94        | 0.92 ± 0.01 |
| 15D10110                    | 7.0 %  | 0.0605626   | 1.406 | 90.1765   | 0.434 | 2.238520  | 2.217  | 184.5687  | 0.070 | 106.0170  | 0.080 | 0.51475 ± 0.00298 | 1.66 ± 0.01   | 89.58       | 4.12        | 0.88 ± 0.01 |
| 15D10112                    | 7.6 %  | 0.0594874   | 1.342 | 79.3321   | 0.467 | 1.934826  | 2.596  | 159.7340  | 0.070 | 92.9092   | 0.091 | 0.50954 ± 0.00324 | 1.64 ± 0.01   | 87.57       | 3.56        | 0.87 ± 0.01 |
| 15D10113                    | 8.4 %  | 0.0397036   | 1.772 | 50.9462   | 0.597 | 1.224839  | 4.097  | 98.3813   | 0.080 | 57.9916   | 0.144 | 0.50981 ± 0.00465 | 1.64 ± 0.01   | 86.46       | 2.19        | 0.83 ± 0.01 |
| 15D10114                    | 9.4 %  | 0.0765251   | 1.104 | 94.3092   | 0.428 | 1.917937  | 2.616  | 148.9838  | 0.071 | 89.2315   | 0.094 | 0.49580 ± 0.00363 | 1.60 ± 0.01   | 82.74       | 3.32        | 0.68 ± 0.01 |
| 15D10116                    | 10.5 % | 0.0529891   | 1.430 | 61.0439   | 0.546 | 1.213509  | 4.074  | 91.7658   | 0.078 | 55.9886   | 0.146 | 0.49067 ± 0.00528 | 1.58 ± 0.02   | 80.39       | 2.05        | 0.65 ± 0.01 |
| 15D10117                    | 11.7 % | 0.0454599   | 1.680 | 50.9337   | 0.620 | 0.977330  | 5.075  | 72.5672   | 0.084 | 45.0551   | 0.187 | 0.48982 ± 0.00673 | 1.58 ± 0.02   | 78.86       | 1.62        | 0.61 ± 0.01 |
| 15D10118                    | 13.1 % | 0.0498997   | 1.487 | 58.5101   | 0.550 | 0.805203  | 6.040  | 63.3783   | 0.089 | 39.7701   | 0.209 | 0.46620 ± 0.00749 | 1.50 ± 0.02   | 74.25       | 1.41        | 0.47 ± 0.01 |
| 15D10120                    | 14.7 % | 0.0401274   | 1.774 | 54.2710   | 0.579 | 0.518567  | 9.736  | 35.0347   | 0.126 | 22.3325   | 0.367 | 0.41940 ± 0.01302 | 1.35 ± 0.04   | 65.73       | 0.78        | 0.28 ± 0.00 |
| 15D10121                    | 16.5 % | 0.0393566   | 1.691 | 62.9205   | 0.515 | 0.381480  | 13.026 | 26.4254   | 0.155 | 16.6929   | 0.487 | 0.37707 ± 0.01629 | 1.21 ± 0.05   | 59.60       | 0.59        | 0.18 ± 0.00 |
| 15D10122                    | 18.5 % | 0.0487852   | 1.478 | 94.9295   | 0.433 | 0.374904  | 13.698 | 23.4674   | 0.170 | 14.9422   | 0.545 | 0.33810 ± 0.01972 | 1.09 ± 0.06   | 52.96       | 0.52        | 0.11 ± 0.00 |
| 15D10124                    | 19.8 % | 0.0416938   | 1.671 | 86.4819   | 0.438 | 0.228791  | 22.448 | 15.5179   | 0.238 | 10.8785   | 0.743 | 0.34225 ± 0.02891 | 1.10 ± 0.09   | 48.64       | 0.34        | 0.08 ± 0.00 |
| 15D10125                    | 21.7 % | 0.0432825   | 1.787 | 99.2521   | 0.427 | 0.228056  | 22.342 | 12.6788   | 0.281 | 9.2207    | 0.893 | 0.33019 ± 0.03893 | 1.06 ± 0.13   | 45.16       | 0.28        | 0.05 ± 0.00 |
| 15D10126                    | 22.8 % | 0.0340251   | 2.037 | 69.3740   | 0.485 | 0.164192  | 30.324 | 9.0630    | 0.425 | 7.5485    | 1.071 | 0.32159 ± 0.04927 | 1.04 ± 0.16   | 38.41       | 0.20        | 0.06 ± 0.00 |
| 15D10128                    | 24.3 % | 0.0260445   | 2.444 | 48.0498   | 0.624 | 0.078545  | 63.796 | 6.1445    | 0.555 | 5.8357    | 1.394 | 0.30793 ± 0.06759 | 0.99 ± 0.22   | 32.25       | 0.14        | 0.05 ± 0.00 |
| Σ                           |        | 2.1050365   | 0.221 | 2833.8025 | 0.079 | 60.708077 | 0.460  | 4484.9954 | 0.015 | 2709.7531 | 0.017 |                   |               |             |             |             |

Information on Analysis and Constants Used in Calculations

Sample = 1180044-1A  
Material = Groundmass  
Location = Kerguelen Plateau  
Analyst = Dan Miggins  
Project = KERGUELEN | FALLOON (14-PIL-01)  
Mass Discrimination Law = LIN  
Irradiation = 14-OSU-07 (7B22-14)  
J = 0.00178150 ± 0.00000207  
FCT-NM = 28.201 ± 0.023 Ma  
IGSN = Undefined  
Preferred Age = Undefined  
Classification = Undefined  
Experiment Type = Incremental Heating  
Extraction Method = Undefined  
Heating = 77 sec  
Isolation = 6.00 min  
Instrument = ARGUS-VI-D  
Lithology = Undefined  
Lat-Lon = Undefined - Undefined  
Collector Calibrations = 40Ar 36Ar

Age Equations = Min et al. (2000)  
Negative Intensities = Allowed  
Decay Constant 40K = 5.530 ± 0.048 E-10 1/a  
Decay Constant 39Ar = 2.940 ± 0.016 E-07 1/h  
Decay Constant 37Ar = 8.230 ± 0.012 E-04 1/h  
Decay Constant 36Cl = 2.257 ± 0.015 E-06 1/a  
Decay Constant 40K(EC,β<sup>+</sup>) = 0.580 ± 0.009 E-10 1/a  
Decay Constant 40K(β<sup>-</sup>) = 4.950 ± 0.043 E-10 1/a  
Atmospheric Ratio 40/36(a) = 295.50  
Atmospheric Ratio 38/36(a) = 0.1869  
Production Ratio 39/37(ca) = 0.000673  
Production Ratio 38/37(ca) = 0.000014  
Production Ratio 36/37(ca) = 0.000264  
Production Ratio 40/39(k) = 0.001010  
Production Ratio 38/39(k) = 0.011380  
Production Ratio 36/38(cl) = 262.80 ± 1.71  
Scaling Ratio K/Ca = 0.430  
Abundance Ratio 40K/K = 1.1700 ± 0.0100 E-04  
Atomic Weight K = 39.0983 ± 0.0001 g

Results

|                           | 40(a)/36(a) ± 2σ      | 40(r)/39(k) ± 2σ          | Age ± 2σ (Ma)                                         | MSWD            | 39Ar(k) (% ,n)                             | K/Ca ± 2σ   |
|---------------------------|-----------------------|---------------------------|-------------------------------------------------------|-----------------|--------------------------------------------|-------------|
| Age Plateau<br>Error Mean |                       | 0.52083 ± 0.00110 ± 0.21% | 1.68 ± 0.01 ± 0.31%                                   | 2.81 0%         | 74.82 16                                   | 0.82 ± 0.04 |
|                           |                       |                           | Full External Error ± 0.04<br>Analytical Error ± 0.00 | 1.73 1.6750     | 2σ Confidence Limit<br>Error Magnification |             |
| Total Fusion Age          |                       | 0.51408 ± 0.00067 ± 0.13% | 1.66 ± 0.00 ± 0.27%                                   |                 | 31                                         | 0.68 ± 0.00 |
|                           |                       |                           | Full External Error ± 0.04<br>Analytical Error ± 0.00 |                 |                                            |             |
| Normal Isochron           | 311.65 ± 6.95 ± 2.23% | 0.51727 ± 0.00166 ± 0.32% | 1.67 ± 0.01 ± 0.40%                                   | 1.25 23%        | 74.82 16                                   |             |
|                           |                       |                           | Full External Error ± 0.04<br>Analytical Error ± 0.01 | 1.76 1.1158     | 2σ Confidence Limit<br>Error Magnification |             |
|                           |                       |                           |                                                       | 65 0.0000051290 | Number of Iterations<br>Convergence        |             |
| Inverse Isochron          | 310.37 ± 6.99 ± 2.25% | 0.51768 ± 0.00166 ± 0.32% | 1.67 ± 0.01 ± 0.40%                                   | 1.25 23%        | 74.82 16                                   |             |
|                           |                       |                           | Full External Error ± 0.04                            | 1.76            | 2σ Confidence Limit                        |             |



| OSU Argon Geochronology Lab |                 |   |           |                 |            |      |                  |      |           |                  |          |      |                  |      |            |                 |          |      |                 |      |           |                 |          |      |                  |      |          |                  |          |      |                 |      |           |                  |  |     |                 |  |     |                 |  |     |                 |  |  |                 |  |  |
|-----------------------------|-----------------|---|-----------|-----------------|------------|------|------------------|------|-----------|------------------|----------|------|------------------|------|------------|-----------------|----------|------|-----------------|------|-----------|-----------------|----------|------|------------------|------|----------|------------------|----------|------|-----------------|------|-----------|------------------|--|-----|-----------------|--|-----|-----------------|--|-----|-----------------|--|--|-----------------|--|--|
| Degassing<br>Patterns       | 36Ar(a)<br>[fA] |   |           | 36Ar(c)<br>[fA] |            |      | 36Ar(ca)<br>[fA] |      |           | 36Ar(cl)<br>[fA] |          |      | 37Ar(ca)<br>[fA] |      |            | 38Ar(a)<br>[fA] |          |      | 38Ar(c)<br>[fA] |      |           | 38Ar(k)<br>[fA] |          |      | 38Ar(ca)<br>[fA] |      |          | 38Ar(cl)<br>[fA] |          |      | 39Ar(k)<br>[fA] |      |           | 39Ar(ca)<br>[fA] |  |     | 40Ar(r)<br>[fA] |  |     | 40Ar(a)<br>[fA] |  |     | 40Ar(c)<br>[fA] |  |  | 40Ar(k)<br>[fA] |  |  |
|                             |                 |   | %1σ       |                 |            | %1σ  |                  |      | %1σ       |                  |          | %1σ  |                  |      | %1σ        |                 |          | %1σ  |                 |      | %1σ       |                 |          | %1σ  |                  |      | %1σ      |                  |          | %1σ  |                 |      | %1σ       |                  |  | %1σ |                 |  | %1σ |                 |  | %1σ |                 |  |  |                 |  |  |
| 15D10088                    | 2.0 %           |   | 0.1728543 | 0.81            | 0.00000000 | 0.00 | 0.0255958        | 0.42 | 0.0002815 | 2.76             | 96.9540  | 0.42 | 0.0323065        | 0.81 | 0.00000000 | 0.00            | 2.068297 | 0.07 | 0.0013477       | 0.42 | 1.9140395 | 2.91            | 181.7484 | 0.07 | 0.0652500        | 0.42 | 99.5507  | 0.42             | 51.07846 | 0.81 | 0.00000000      | 0.00 | 0.1835659 | 0.07             |  |     |                 |  |     |                 |  |     |                 |  |  |                 |  |  |
| 15D10090                    | 2.2 %           | ✓ | 0.1195428 | 0.96            | 0.00000000 | 0.00 | 0.0269751        | 0.41 | 0.0002012 | 3.86             | 102.1784 | 0.41 | 0.0223426        | 0.96 | 0.00000000 | 0.00            | 2.129713 | 0.07 | 0.0014203       | 0.41 | 1.3677530 | 3.96            | 187.1453 | 0.07 | 0.0687661        | 0.41 | 98.2901  | 0.35             | 35.32491 | 0.96 | 0.00000000      | 0.00 | 0.1890167 | 0.07             |  |     |                 |  |     |                 |  |     |                 |  |  |                 |  |  |
| 15D10091                    | 2.4 %           | ✓ | 0.0764198 | 1.26            | 0.00000000 | 0.00 | 0.0224756        | 0.45 | 0.0001163 | 6.20             | 85.1347  | 0.45 | 0.0142829        | 1.26 | 0.00000000 | 0.00            | 1.719459 | 0.07 | 0.0011834       | 0.45 | 0.7904124 | 6.26            | 151.0948 | 0.07 | 0.0572957        | 0.45 | 79.0540  | 0.38             | 22.58205 | 1.26 | 0.00000000      | 0.00 | 0.1526058 | 0.07             |  |     |                 |  |     |                 |  |     |                 |  |  |                 |  |  |
| 15D10092                    | 2.6 %           | ✓ | 0.0764445 | 1.28            | 0.00000000 | 0.00 | 0.0296776        | 0.40 | 0.0001057 | 7.08             | 112.4153 | 0.40 | 0.0142875        | 1.28 | 0.00000000 | 0.00            | 2.253498 | 0.07 | 0.0015626       | 0.40 | 0.7182838 | 7.14            | 198.0226 | 0.07 | 0.0756555        | 0.40 | 103.7342 | 0.29             | 22.58935 | 1.28 | 0.00000000      | 0.00 | 0.2000029 | 0.07             |  |     |                 |  |     |                 |  |     |                 |  |  |                 |  |  |
| 15D10094                    | 2.8 %           | ✓ | 0.0624908 | 1.34            | 0.00000000 | 0.00 | 0.0305478        | 0.40 | 0.0000845 | 8.65             | 115.7113 | 0.40 | 0.0116795        | 1.34 | 0.00000000 | 0.00            | 2.259007 | 0.07 | 0.0016084       | 0.40 | 0.5739129 | 8.69            | 198.5068 | 0.07 | 0.0778737        | 0.40 | 103.9542 | 0.25             | 18.46604 | 1.34 | 0.00000000      | 0.00 | 0.2004918 | 0.07             |  |     |                 |  |     |                 |  |     |                 |  |  |                 |  |  |
| 15D10095                    | 3.0 %           | ✓ | 0.0449630 | 1.79            | 0.00000000 | 0.00 | 0.0254681        | 0.43 | 0.0000537 | 14.19            | 96.4702  | 0.43 | 0.0084036        | 1.79 | 0.00000000 | 0.00            | 1.893848 | 0.07 | 0.0013409       | 0.43 | 0.3648076 | 14.22           | 166.4190 | 0.07 | 0.0649244        | 0.43 | 87.3808  | 0.29             | 13.28656 | 1.79 | 0.00000000      | 0.00 | 0.1680832 | 0.07             |  |     |                 |  |     |                 |  |     |                 |  |  |                 |  |  |
| 15D10096                    | 3.3 %           | ✓ | 0.0536430 | 1.65            | 0.00000000 | 0.00 | 0.0358912        | 0.38 | 0.0000592 | 12.68            | 135.9514 | 0.38 | 0.0100259        | 1.65 | 0.00000000 | 0.00            | 2.694951 | 0.07 | 0.0018897       | 0.38 | 0.4021361 | 12.71           | 236.8147 | 0.07 | 0.0914953        | 0.38 | 123.6205 | 0.22             | 15.85151 | 1.65 | 0.00000000      | 0.00 | 0.2391828 | 0.07             |  |     |                 |  |     |                 |  |     |                 |  |  |                 |  |  |
| 15D10097                    | 3.6 %           | ✓ | 0.0390790 | 2.19            | 0.00000000 | 0.00 | 0.0298123        | 0.40 | 0.0000280 | 26.75            | 112.9255 | 0.40 | 0.0073039        | 2.19 | 0.00000000 | 0.00            | 2.272881 | 0.07 | 0.0015697       | 0.40 | 0.1900243 | 26.77           | 199.7259 | 0.07 | 0.0759989        | 0.40 | 104.1776 | 0.26             | 11.54784 | 2.19 | 0.00000000      | 0.00 | 0.2017232 | 0.07             |  |     |                 |  |     |                 |  |     |                 |  |  |                 |  |  |
| 15D10099                    | 3.9 %           | ✓ | 0.0398890 | 2.21            | 0.00000000 | 0.00 | 0.0328653        | 0.39 | 0.0000369 | 19.90            | 124.4899 | 0.39 | 0.0074552        | 2.21 | 0.00000000 | 0.00            | 2.601310 | 0.07 | 0.0017304       | 0.39 | 0.2508257 | 19.92           | 228.5862 | 0.07 | 0.0837817        | 0.39 | 118.9337 | 0.23             | 11.78719 | 2.21 | 0.00000000      | 0.00 | 0.2308720 | 0.07             |  |     |                 |  |     |                 |  |     |                 |  |  |                 |  |  |
| 15D10100                    | 4.3 %           | ✓ | 0.0403969 | 2.09            | 0.00000000 | 0.00 | 0.0354349        | 0.38 | 0.0000354 | 20.81            | 134.2231 | 0.38 | 0.0075502        | 2.09 | 0.00000000 | 0.00            | 2.947796 | 0.07 | 0.0018657       | 0.38 | 0.2404202 | 20.83           | 259.0330 | 0.07 | 0.0903321        | 0.38 | 135.2565 | 0.19             | 11.93729 | 2.09 | 0.00000000      | 0.00 | 0.2616233 | 0.07             |  |     |                 |  |     |                 |  |     |                 |  |  |                 |  |  |
| 15D10101                    | 4.6 %           | ✓ | 0.0402607 | 2.02            | 0.00000000 | 0.00 | 0.0341555        | 0.38 | 0.0000342 | 21.25            | 129.3767 | 0.38 | 0.0075247        | 2.02 | 0.00000000 | 0.00            | 2.996989 | 0.07 | 0.0017983       | 0.38 | 0.2321280 | 21.27           | 263.3558 | 0.07 | 0.0870706        | 0.38 | 136.9044 | 0.19             | 11.89702 | 2.02 | 0.00000000      | 0.00 | 0.2659893 | 0.07             |  |     |                 |  |     |                 |  |     |                 |  |  |                 |  |  |
| 15D10102                    | 4.9 %           | ✓ | 0.0395318 | 2.14            | 0.00000000 | 0.00 | 0.0338171        | 0.38 | 0.0000273 | 27.73            | 128.0949 | 0.38 | 0.0073885        | 2.14 | 0.00000000 | 0.00            | 3.083020 | 0.07 | 0.0017805       | 0.38 | 0.1852347 | 27.74           | 270.9157 | 0.07 | 0.0862079        | 0.38 | 140.7385 | 0.19             | 11.68165 | 2.14 | 0.00000000      | 0.00 | 0.2736248 | 0.07             |  |     |                 |  |     |                 |  |     |                 |  |  |                 |  |  |
| 15D10104                    | 5.2 %           | ✓ | 0.0455231 | 2.05            | 0.00000000 | 0.00 | 0.0366625        | 0.38 | 0.0000323 | 22.82            | 138.8732 | 0.38 | 0.0085083        | 2.05 | 0.00000000 | 0.00            | 3.420912 | 0.07 | 0.0019303       | 0.38 | 0.2190651 | 22.84           | 300.6074 | 0.07 | 0.0934617        | 0.38 | 155.7881 | 0.19             | 13.45209 | 2.05 | 0.00000000      | 0.00 | 0.3036135 | 0.07             |  |     |                 |  |     |                 |  |     |                 |  |  |                 |  |  |
| 15D10105                    | 5.5 %           | ✓ | 0.0278995 | 2.90            | 0.00000000 | 0.00 | 0.0220469        | 0.44 | 0.0000181 | 40.25            | 83.5109  | 0.44 | 0.0052144        | 2.90 | 0.00000000 | 0.00            | 2.079932 | 0.07 | 0.0011608       | 0.44 | 0.1225381 | 40.26           | 182.7708 | 0.07 | 0.0562028        | 0.44 | 94.6638  | 0.27             | 8.24429  | 2.90 | 0.00000000      | 0.00 | 0.1845985 | 0.07             |  |     |                 |  |     |                 |  |     |                 |  |  |                 |  |  |
| 15D10106                    | 5.8 %           | ✓ | 0.0266064 | 2.80            | 0.00000000 | 0.00 | 0.0207252        | 0.46 | 0.0000222 | 34.14            | 78.5047  | 0.46 | 0.0049727        | 2.80 | 0.00000000 | 0.00            | 1.961196 | 0.07 | 0.0010912       | 0.46 | 0.1505043 | 34.15           | 172.3371 | 0.07 | 0.0528337        | 0.46 | 89.4757  | 0.26             | 7.86218  | 2.80 | 0.00000000      | 0.00 | 0.1740604 | 0.07             |  |     |                 |  |     |                 |  |     |                 |  |  |                 |  |  |
| 15D10108                    | 6.1 %           | ✓ | 0.0334998 | 2.50            | 0.00000000 | 0.00 | 0.0255459        | 0.42 | 0.0000235 | 30.99            | 96.7647  | 0.42 | 0.0062611        | 2.50 | 0.00000000 | 0.00            | 2.358760 | 0.07 | 0.0013450       | 0.42 | 0.1593002 | 31.01           | 207.2724 | 0.07 | 0.0651226        | 0.42 | 107.5623 | 0.24             | 9.89919  | 2.50 | 0.00000000      | 0.00 | 0.2093451 | 0.07             |  |     |                 |  |     |                 |  |     |                 |  |  |                 |  |  |
| 15D10109                    | 6.5 %           | ✓ | 0.0228921 | 3.32            | 0.00000000 | 0.00 | 0.0162870        | 0.51 | 0.0000139 | 53.29            | 61.6931  | 0.51 | 0.0042785        | 3.32 | 0.00000000 | 0.00            | 1.498688 | 0.07 | 0.0008575       | 0.51 | 0.0944651 | 53.29           | 131.6949 | 0.07 | 0.0415195        | 0.51 | 68.4303  | 0.35             | 6.76462  | 3.32 | 0.00000000      | 0.00 | 0.1330118 | 0.07             |  |     |                 |  |     |                 |  |     |                 |  |  |                 |  |  |
| 15D10110                    | 7.0 %           |   | 0.0367368 | 2.33            | 0.00000000 | 0.00 | 0.0238066        | 0.43 | 0.0000193 | 38.00            | 90.1765  | 0.43 | 0.0068661        | 2.33 | 0.00000000 | 0.00            | 2.099701 | 0.07 | 0.0012535       | 0.43 | 0.1306995 | 38.01           | 184.5080 | 0.07 | 0.0606888        | 0.43 | 94.9749  | 0.28             | 10.85572 | 2.33 | 0.00000000      | 0.00 | 0.1863531 | 0.07             |  |     |                 |  |     |                 |  |     |                 |  |  |                 |  |  |
| 15D10112                    | 7.6 %           |   | 0.0385276 | 2.09            | 0.00000000 | 0.00 | 0.0209437        | 0.47 | 0.0000161 | 45.95            | 79.3321  | 0.47 | 0.0072008        | 2.09 | 0.00000000 | 0.00            | 1.817165 | 0.07 | 0.0011027       | 0.47 | 0.1093574 | 45.96           | 159.6806 | 0.07 | 0.0533905        | 0.47 | 81.3630  | 0.31             | 11.38490 | 2.09 | 0.00000000      | 0.00 | 0.1612774 | 0.07             |  |     |                 |  |     |                 |  |     |                 |  |  |                 |  |  |
| 15D10113                    | 8.4 %           |   | 0.0262391 | 2.70            | 0.00000000 | 0.00 | 0.0134498        | 0.60 | 0.0000147 | 50.19            | 50.9462  | 0.60 | 0.0049041        | 2.70 | 0.00000000 | 0.00            | 1.119189 | 0.08 | 0.0007082       | 0.60 | 0.1000374 | 50.19           | 98.3470  | 0.08 | 0.0342868        | 0.60 | 50.1386  | 0.45             | 7.75365  | 2.70 | 0.00000000      | 0.00 | 0.0993305 | 0.08             |  |     |                 |  |     |                 |  |     |                 |  |  |                 |  |  |
| 15D10114                    | 9.4 %           |   | 0.0515962 | 1.65            | 0.00000000 | 0.00 | 0.0248976        | 0.43 | 0.0000313 | 23.67            | 94.3092  | 0.43 | 0.0096433        | 1.65 | 0.00000000 | 0.00            | 1.694714 | 0.07 | 0.0013109       | 0.43 | 0.2122695 | 23.68           | 148.9204 | 0.07 | 0.0634701        | 0.43 | 73.8345  | 0.36             | 15.24668 | 1.65 | 0.00000000      | 0.00 | 0.1504096 | 0.07             |  |     |                 |  |     |                 |  |     |                 |  |  |                 |  |  |
| 15D10116                    | 10.5 %          |   | 0.0368497 | 2.07            | 0.00000000 | 0.00 | 0.0161156        | 0.55 | 0.0000239 | 30.55            | 61.0439  | 0.55 | 0.0068872        | 2.07 | 0.00000000 | 0.00            | 1.043827 | 0.08 | 0.00            |      |           |                 |          |      |                  |      |          |                  |          |      |                 |      |           |                  |  |     |                 |  |     |                 |  |     |                 |  |  |                 |  |  |



| Additional Parameters |        |   | 40Ar/39Ar | 1σ       | 37Ar/39Ar | 1σ       | 36Ar/39Ar | 1σ       | Time (days) | 37Ar (decay) | 39Ar (decay) | 40Ar (moles) |
|-----------------------|--------|---|-----------|----------|-----------|----------|-----------|----------|-------------|--------------|--------------|--------------|
| 15D10088              | 2.0 %  |   | 0.829490  | 0.000756 | 0.533260  | 0.002259 | 0.001093  | 0.000008 | 90.560      | 5.996748     | 1.00064008   | 7.239E-12    |
| 15D10090              | 2.2 %  | ✓ | 0.714711  | 0.000677 | 0.545784  | 0.002261 | 0.000784  | 0.000006 | 90.579      | 5.998969     | 1.00064021   | 6.423E-12    |
| 15D10091              | 2.4 %  | ✓ | 0.673419  | 0.000738 | 0.563239  | 0.002563 | 0.000655  | 0.000006 | 90.590      | 6.000204     | 1.00064029   | 4.886E-12    |
| 15D10092              | 2.6 %  | ✓ | 0.638691  | 0.000614 | 0.567472  | 0.002304 | 0.000536  | 0.000005 | 90.599      | 6.001356     | 1.00064036   | 6.073E-12    |
| 15D10094              | 2.8 %  | ✓ | 0.617474  | 0.000603 | 0.582680  | 0.002350 | 0.000469  | 0.000004 | 90.618      | 6.003579     | 1.00064049   | 5.886E-12    |
| 15D10095              | 3.0 %  | ✓ | 0.605677  | 0.000658 | 0.579457  | 0.002500 | 0.000423  | 0.000005 | 90.628      | 6.004732     | 1.00064056   | 4.840E-12    |
| 15D10096              | 3.3 %  | ✓ | 0.589732  | 0.000538 | 0.573862  | 0.002191 | 0.000378  | 0.000004 | 90.638      | 6.005885     | 1.00064063   | 6.706E-12    |
| 15D10097              | 3.6 %  | ✓ | 0.580211  | 0.000580 | 0.565187  | 0.002286 | 0.000345  | 0.000004 | 90.647      | 6.006956     | 1.00064069   | 5.565E-12    |
| 15D10099              | 3.9 %  | ✓ | 0.572667  | 0.000543 | 0.544408  | 0.002136 | 0.000318  | 0.000004 | 90.665      | 6.009099     | 1.00064082   | 6.286E-12    |
| 15D10100              | 4.3 %  | ✓ | 0.569055  | 0.000503 | 0.517989  | 0.001979 | 0.000293  | 0.000003 | 90.674      | 6.010253     | 1.00064089   | 7.078E-12    |
| 15D10101              | 4.6 %  | ✓ | 0.565843  | 0.000503 | 0.491100  | 0.001895 | 0.000283  | 0.000003 | 90.683      | 6.011243     | 1.00064094   | 7.155E-12    |
| 15D10102              | 4.9 %  | ✓ | 0.563442  | 0.000496 | 0.472672  | 0.001826 | 0.000271  | 0.000003 | 90.692      | 6.012315     | 1.00064101   | 7.329E-12    |
| 15D10104              | 5.2 %  | ✓ | 0.563829  | 0.000475 | 0.461832  | 0.001764 | 0.000273  | 0.000003 | 90.709      | 6.014377     | 1.00064113   | 8.138E-12    |
| 15D10105              | 5.5 %  | ✓ | 0.563881  | 0.000610 | 0.456776  | 0.002049 | 0.000273  | 0.000004 | 90.717      | 6.015367     | 1.00064119   | 4.948E-12    |
| 15D10106              | 5.8 %  | ✓ | 0.565648  | 0.000627 | 0.455391  | 0.002105 | 0.000275  | 0.000004 | 90.726      | 6.016439     | 1.00064125   | 4.681E-12    |
| 15D10108              | 6.1 %  | ✓ | 0.567533  | 0.000565 | 0.466701  | 0.002008 | 0.000285  | 0.000004 | 90.744      | 6.018503     | 1.00064138   | 5.648E-12    |
| 15D10109              | 6.5 %  | ✓ | 0.571808  | 0.000763 | 0.468307  | 0.002403 | 0.000298  | 0.000006 | 90.752      | 6.019494     | 1.00064143   | 3.616E-12    |
| 15D10110              | 7.0 %  |   | 0.574404  | 0.000608 | 0.488580  | 0.002148 | 0.000328  | 0.000005 | 90.761      | 6.020567     | 1.00064150   | 5.089E-12    |
| 15D10112              | 7.6 %  |   | 0.581649  | 0.000669 | 0.496651  | 0.002345 | 0.000372  | 0.000005 | 90.778      | 6.022632     | 1.00064162   | 4.460E-12    |
| 15D10113              | 8.4 %  |   | 0.589457  | 0.000969 | 0.517844  | 0.003118 | 0.000404  | 0.000007 | 90.787      | 6.023623     | 1.00064168   | 2.784E-12    |
| 15D10114              | 9.4 %  |   | 0.598934  | 0.000705 | 0.633016  | 0.002747 | 0.000514  | 0.000006 | 90.796      | 6.024698     | 1.00064174   | 4.283E-12    |
| 15D10116              | 10.5 % |   | 0.610124  | 0.001010 | 0.665214  | 0.003669 | 0.000577  | 0.000008 | 90.813      | 6.026764     | 1.00064187   | 2.687E-12    |
| 15D10117              | 11.7 % |   | 0.620874  | 0.001272 | 0.701883  | 0.004388 | 0.000626  | 0.000011 | 90.822      | 6.027756     | 1.00064192   | 2.163E-12    |
| 15D10118              | 13.1 % |   | 0.627504  | 0.001427 | 0.923188  | 0.005143 | 0.000787  | 0.000012 | 90.831      | 6.028831     | 1.00064199   | 1.909E-12    |
| 15D10120              | 14.7 % |   | 0.637442  | 0.002475 | 1.549066  | 0.009180 | 0.001145  | 0.000020 | 90.848      | 6.030899     | 1.00064211   | 1.072E-12    |
| 15D10121              | 16.5 % |   | 0.631698  | 0.003225 | 2.381058  | 0.012807 | 0.001489  | 0.000025 | 90.856      | 6.031891     | 1.00064217   | 8.013E-13    |
| 15D10122              | 18.5 % |   | 0.636723  | 0.003639 | 4.045170  | 0.018825 | 0.002079  | 0.000031 | 90.865      | 6.032967     | 1.00064223   | 7.172E-13    |
| 15D10124              | 19.8 % |   | 0.701026  | 0.005471 | 5.573041  | 0.027773 | 0.002687  | 0.000045 | 90.883      | 6.035119     | 1.00064236   | 5.222E-13    |
| 15D10125              | 21.7 % |   | 0.727252  | 0.006805 | 7.828181  | 0.040026 | 0.003414  | 0.000062 | 90.892      | 6.036195     | 1.00064242   | 4.426E-13    |
| 15D10126              | 22.8 % |   | 0.832893  | 0.009597 | 7.654623  | 0.049370 | 0.003754  | 0.000078 | 90.901      | 6.037272     | 1.00064249   | 3.623E-13    |
| 15D10128              | 24.3 % |   | 0.949747  | 0.014254 | 7.819937  | 0.065309 | 0.004239  | 0.000106 | 90.919      | 6.039342     | 1.00064261   | 2.801E-13    |



| Procedure<br>Blanks |        | 36Ar<br>[fA] | 1σ        | 37Ar<br>[fA] | 1σ        | 38Ar<br>[fA] | 1σ        | 39Ar<br>[fA] | 1σ        | 40Ar<br>[fA] | 1σ        |
|---------------------|--------|--------------|-----------|--------------|-----------|--------------|-----------|--------------|-----------|--------------|-----------|
| 15D10088            | 2.0 %  | 0.0185718    | 0.0003289 | 0.0966461    | 0.0293198 | 0.0340636    | 0.0413624 | 0.0778633    | 0.0252006 | 6.1106031    | 0.0766588 |
| 15D10090            | 2.2 %  | 0.0177741    | 0.0003289 | 0.0435710    | 0.0293198 | 0.0340526    | 0.0413624 | 0.0686678    | 0.0252006 | 5.8001723    | 0.0766588 |
| 15D10091            | 2.4 %  | 0.0174652    | 0.0003289 | 0.0240667    | 0.0293198 | 0.0340299    | 0.0413624 | 0.0644805    | 0.0252006 | 5.6600866    | 0.0766588 |
| 15D10092            | 2.6 %  | 0.0172467    | 0.0003289 | 0.0111708    | 0.0293198 | 0.0339979    | 0.0413624 | 0.0610996    | 0.0252006 | 5.5472841    | 0.0766588 |
| 15D10094            | 2.8 %  | 0.0169753    | 0.0003289 | 0.0020245    | 0.0293198 | 0.0339070    | 0.0413624 | 0.0558434    | 0.0252006 | 5.3713690    | 0.0766588 |
| 15D10095            | 3.0 %  | 0.0168933    | 0.0003289 | 0.0041224    | 0.0293198 | 0.0338447    | 0.0413624 | 0.0536880    | 0.0252006 | 5.2983140    | 0.0766588 |
| 15D10096            | 3.3 %  | 0.0168398    | 0.0003289 | 0.0037972    | 0.0293198 | 0.0337720    | 0.0413624 | 0.0518656    | 0.0252006 | 5.2355139    | 0.0766588 |
| 15D10097            | 3.6 %  | 0.0168087    | 0.0003289 | 0.0018199    | 0.0293198 | 0.0336953    | 0.0413624 | 0.0504354    | 0.0252006 | 5.1850761    | 0.0766588 |
| 15D10099            | 3.9 %  | 0.0167772    | 0.0003289 | 0.0053166    | 0.0293198 | 0.0335149    | 0.0413624 | 0.0482021    | 0.0252006 | 5.1025462    | 0.0766588 |
| 15D10100            | 4.3 %  | 0.0167663    | 0.0003289 | 0.0101046    | 0.0293198 | 0.0334030    | 0.0413624 | 0.0472770    | 0.0252006 | 5.0660627    | 0.0766588 |
| 15D10101            | 4.6 %  | 0.0167552    | 0.0003289 | 0.0143464    | 0.0293198 | 0.0332989    | 0.0413624 | 0.0466023    | 0.0252006 | 5.0381711    | 0.0766588 |
| 15D10102            | 4.9 %  | 0.0167381    | 0.0003289 | 0.0188244    | 0.0293198 | 0.0331775    | 0.0413624 | 0.0459676    | 0.0252006 | 5.0107608    | 0.0766588 |
| 15D10104            | 5.2 %  | 0.0166807    | 0.0003289 | 0.0262737    | 0.0293198 | 0.0329189    | 0.0413624 | 0.0449307    | 0.0252006 | 4.9639652    | 0.0766588 |
| 15D10105            | 5.5 %  | 0.0166384    | 0.0003289 | 0.0289951    | 0.0293198 | 0.0327830    | 0.0413624 | 0.0444752    | 0.0252006 | 4.9433796    | 0.0766588 |
| 15D10106            | 5.8 %  | 0.0165801    | 0.0003289 | 0.0311437    | 0.0293198 | 0.0326272    | 0.0413624 | 0.0439823    | 0.0252006 | 4.9219345    | 0.0766588 |
| 15D10108            | 6.1 %  | 0.0164302    | 0.0003289 | 0.0326144    | 0.0293198 | 0.0323025    | 0.0413624 | 0.0429520    | 0.0252006 | 4.8821464    | 0.0766588 |
| 15D10109            | 6.5 %  | 0.0163410    | 0.0003289 | 0.0319969    | 0.0293198 | 0.0321350    | 0.0413624 | 0.0423815    | 0.0252006 | 4.8634153    | 0.0766588 |
| 15D10110            | 7.0 %  | 0.0162329    | 0.0003289 | 0.0303544    | 0.0293198 | 0.0319448    | 0.0413624 | 0.0416822    | 0.0252006 | 4.8432972    | 0.0766588 |
| 15D10112            | 7.6 %  | 0.0159980    | 0.0003289 | 0.0245211    | 0.0293198 | 0.0315541    | 0.0413624 | 0.0400289    | 0.0252006 | 4.8053022    | 0.0766588 |
| 15D10113            | 8.4 %  | 0.0158768    | 0.0003289 | 0.0206229    | 0.0293198 | 0.0313548    | 0.0413624 | 0.0390601    | 0.0252006 | 4.7876546    | 0.0766588 |
| 15D10114            | 9.4 %  | 0.0157434    | 0.0003289 | 0.0157606    | 0.0293198 | 0.0311303    | 0.0413624 | 0.0378611    | 0.0252006 | 4.7692957    | 0.0766588 |
| 15D10116            | 10.5 % | 0.0154949    | 0.0003289 | 0.0052077    | 0.0293198 | 0.0306735    | 0.0413624 | 0.0350610    | 0.0252006 | 4.7376308    | 0.0766588 |
| 15D10117            | 11.7 % | 0.0153874    | 0.0003289 | 0.0000363    | 0.0293198 | 0.0304425    | 0.0413624 | 0.0334612    | 0.0252006 | 4.7249761    | 0.0766588 |
| 15D10118            | 13.1 % | 0.0152863    | 0.0003289 | 0.0055141    | 0.0293198 | 0.0301836    | 0.0413624 | 0.0315242    | 0.0252006 | 4.7138795    | 0.0766588 |
| 15D10120            | 14.7 % | 0.0151593    | 0.0003289 | 0.0142924    | 0.0293198 | 0.0296607    | 0.0413624 | 0.0271594    | 0.0252006 | 4.7028326    | 0.0766588 |
| 15D10121            | 16.5 % | 0.0151417    | 0.0003289 | 0.0170706    | 0.0293198 | 0.0293980    | 0.0413624 | 0.0247468    | 0.0252006 | 4.7037609    | 0.0766588 |
| 15D10122            | 18.5 % | 0.0151638    | 0.0003289 | 0.0185263    | 0.0293198 | 0.0291048    | 0.0413624 | 0.0218885    | 0.0252006 | 4.7105000    | 0.0766588 |
| 15D10124            | 19.8 % | 0.0153700    | 0.0003289 | 0.0147823    | 0.0293198 | 0.0284916    | 0.0413624 | 0.0153760    | 0.0252006 | 4.7461097    | 0.0766588 |
| 15D10125            | 21.7 % | 0.0155726    | 0.0003289 | 0.0085735    | 0.0293198 | 0.0281715    | 0.0413624 | 0.0117074    | 0.0252006 | 4.7773628    | 0.0766588 |
| 15D10126            | 22.8 % | 0.0158549    | 0.0003289 | 0.0012587    | 0.0293198 | 0.0278426    | 0.0413624 | 0.0077557    | 0.0252006 | 4.8193181    | 0.0766588 |
| 15D10128            | 24.3 % | 0.0166615    | 0.0003289 | 0.0325641    | 0.0293198 | 0.0271849    | 0.0413624 | 0.0006558    | 0.0252006 | 4.9353546    | 0.0766588 |



| OSU Argon Geochronology Lab |        |           |           |        |                |         |        |        |                |           |           |        |                |          |        |        |                |          |        |        |                |    |    |  |  |
|-----------------------------|--------|-----------|-----------|--------|----------------|---------|--------|--------|----------------|-----------|-----------|--------|----------------|----------|--------|--------|----------------|----------|--------|--------|----------------|----|----|--|--|
| Intercept<br>Values         | 36Ar   |           |           |        |                | 37Ar    |        |        |                |           | 38Ar      |        |                |          |        | 39Ar   |                |          |        |        | 40Ar           |    |    |  |  |
|                             | [fA]   | 1σ        | r2        |        |                | [fA]    | 1σ     | r2     |                |           | [fA]      | 1σ     | r2             |          |        | [fA]   | 1σ             | r2       |        |        | [fA]           | 1σ | r2 |  |  |
| 15D10088                    | 2.0 %  | 0.2050353 | 0.0011572 | 0.2125 | EXP 150 of 150 | 15.9484 | 0.0301 | 0.9027 | EXP 150 of 150 | 3.9295261 | 0.0259132 | 0.3502 | EXP 150 of 150 | 180.5919 | 0.0442 | 0.9987 | EXP 150 of 150 | 157.3677 | 0.0413 | 0.9790 | EXP 150 of 150 |    |    |  |  |
| 15D10090                    | 2.2 %  | 0.1554359 | 0.0009412 | 0.0871 | EXP 150 of 150 | 16.7433 | 0.0297 | 0.9046 | EXP 150 of 150 | 3.4412310 | 0.0286670 | 0.2580 | EXP 150 of 150 | 185.9445 | 0.0395 | 0.9990 | EXP 150 of 150 | 139.9984 | 0.0392 | 0.9690 | EXP 150 of 150 |    |    |  |  |
| 15D10091                    | 2.4 %  | 0.1103645 | 0.0007939 | 0.0009 | EXP 150 of 150 | 13.9354 | 0.0321 | 0.8522 | EXP 149 of 150 | 2.4583567 | 0.0237063 | 0.2096 | EXP 149 of 150 | 150.1361 | 0.0373 | 0.9986 | EXP 150 of 150 | 107.7487 | 0.0362 | 0.8357 | EXP 150 of 150 |    |    |  |  |
| 15D10092                    | 2.6 %  | 0.1169169 | 0.0008026 | 0.0183 | EXP 150 of 150 | 18.3767 | 0.0319 | 0.9069 | EXP 150 of 150 | 2.9146506 | 0.0273056 | 0.2585 | EXP 150 of 150 | 196.7433 | 0.0390 | 0.9991 | EXP 150 of 150 | 132.4437 | 0.0366 | 0.9575 | EXP 150 of 150 |    |    |  |  |
| 15D10094                    | 2.8 %  | 0.1043497 | 0.0006587 | 0.0441 | EXP 149 of 150 | 18.8950 | 0.0324 | 0.9233 | EXP 150 of 150 | 2.7751630 | 0.0253758 | 0.3136 | EXP 150 of 150 | 197.2209 | 0.0392 | 0.9991 | EXP 150 of 150 | 128.3534 | 0.0364 | 0.9587 | EXP 150 of 150 |    |    |  |  |
| 15D10095                    | 3.0 %  | 0.0830269 | 0.0006459 | 0.2079 | EXP 150 of 150 | 15.7475 | 0.0323 | 0.8760 | EXP 150 of 150 | 2.2049574 | 0.0296517 | 0.1335 | EXP 149 of 150 | 165.3475 | 0.0334 | 0.9991 | EXP 150 of 150 | 106.4309 | 0.0353 | 0.8436 | EXP 150 of 150 |    |    |  |  |
| 15D10096                    | 3.3 %  | 0.1009024 | 0.0007126 | 0.1005 | EXP 150 of 150 | 22.1901 | 0.0308 | 0.9461 | EXP 150 of 150 | 3.0346640 | 0.0280786 | 0.3733 | EXP 150 of 150 | 235.2645 | 0.0394 | 0.9994 | EXP 150 of 150 | 145.3583 | 0.0379 | 0.9730 | EXP 150 of 150 |    |    |  |  |
| 15D10097                    | 3.6 %  | 0.0814734 | 0.0007019 | 0.1673 | EXP 150 of 150 | 18.4298 | 0.0314 | 0.9163 | EXP 150 of 150 | 2.4058313 | 0.0281161 | 0.0808 | EXP 150 of 150 | 198.4240 | 0.0391 | 0.9991 | EXP 150 of 150 | 121.4538 | 0.0346 | 0.9355 | EXP 150 of 150 |    |    |  |  |
| 15D10099                    | 3.9 %  | 0.0850748 | 0.0007249 | 0.1329 | EXP 150 of 150 | 20.3173 | 0.0314 | 0.9303 | EXP 149 of 150 | 2.7904720 | 0.0263507 | 0.2663 | EXP 149 of 150 | 227.0834 | 0.0390 | 0.9993 | EXP 150 of 150 | 136.4402 | 0.0406 | 0.9616 | EXP 150 of 150 |    |    |  |  |
| 15D10100                    | 4.3 %  | 0.0879500 | 0.0006807 | 0.3358 | EXP 149 of 150 | 21.9059 | 0.0302 | 0.9401 | EXP 150 of 150 | 3.1225054 | 0.0264800 | 0.3385 | EXP 150 of 150 | 257.3182 | 0.0425 | 0.9994 | EXP 150 of 150 | 152.9560 | 0.0346 | 0.9830 | EXP 150 of 150 |    |    |  |  |
| 15D10101                    | 4.6 %  | 0.0866095 | 0.0006485 | 0.3469 | EXP 150 of 150 | 21.1161 | 0.0301 | 0.9385 | EXP 150 of 150 | 3.1628855 | 0.0251714 | 0.3333 | EXP 150 of 150 | 261.6061 | 0.0473 | 0.9993 | EXP 150 of 150 | 154.5448 | 0.0383 | 0.9784 | EXP 150 of 150 |    |    |  |  |
| 15D10102                    | 4.9 %  | 0.0855845 | 0.0006869 | 0.2783 | EXP 150 of 150 | 20.9078 | 0.0299 | 0.9433 | EXP 150 of 150 | 3.2014825 | 0.0288766 | 0.2564 | EXP 150 of 150 | 269.1105 | 0.0408 | 0.9995 | EXP 150 of 150 | 158.1544 | 0.0413 | 0.9770 | EXP 150 of 150 |    |    |  |  |
| 15D10104                    | 5.2 %  | 0.0938231 | 0.0007694 | 0.1438 | EXP 150 of 150 | 22.6651 | 0.0321 | 0.9409 | EXP 150 of 150 | 3.5698662 | 0.0263032 | 0.3758 | EXP 150 of 150 | 298.5961 | 0.0396 | 0.9996 | EXP 150 of 150 | 175.0073 | 0.0422 | 0.9859 | EXP 150 of 150 |    |    |  |  |
| 15D10105                    | 5.5 %  | 0.0635183 | 0.0006643 | 0.3352 | EXP 150 of 150 | 13.6406 | 0.0290 | 0.8673 | EXP 150 of 150 | 2.1472410 | 0.0254397 | 0.2008 | EXP 150 of 150 | 181.5644 | 0.0401 | 0.9989 | EXP 150 of 150 | 108.3398 | 0.0374 | 0.8041 | EXP 150 of 150 |    |    |  |  |
| 15D10106                    | 5.8 %  | 0.0610106 | 0.0005961 | 0.3630 | EXP 150 of 150 | 12.8245 | 0.0291 | 0.8546 | EXP 150 of 150 | 2.0575039 | 0.0291360 | 0.1684 | EXP 150 of 150 | 171.2014 | 0.0395 | 0.9988 | EXP 150 of 150 | 102.7212 | 0.0339 | 0.7631 | EXP 150 of 150 |    |    |  |  |
| 15D10108                    | 6.1 %  | 0.0718529 | 0.0006902 | 0.2967 | EXP 149 of 150 | 15.7962 | 0.0320 | 0.8793 | EXP 150 of 150 | 2.4604086 | 0.0254577 | 0.2561 | EXP 150 of 150 | 205.8982 | 0.0430 | 0.9990 | EXP 150 of 150 | 122.8997 | 0.0355 | 0.9521 | EXP 150 of 150 |    |    |  |  |
| 15D10109                    | 6.5 %  | 0.0531145 | 0.0006185 | 0.2812 | EXP 150 of 150 | 10.0806 | 0.0262 | 0.8166 | EXP 150 of 150 | 1.5452993 | 0.0274039 | 0.0919 | EXP 150 of 150 | 130.8369 | 0.0357 | 0.9983 | EXP 150 of 150 | 80.4133  | 0.0354 | 0.1107 | EXP 149 of 150 |    |    |  |  |
| 15D10110                    | 7.0 %  | 0.0730568 | 0.0007102 | 0.1726 | EXP 150 of 150 | 14.7157 | 0.0308 | 0.8803 | EXP 150 of 150 | 2.1773671 | 0.0260803 | 0.1212 | EXP 150 of 150 | 183.2908 | 0.0405 | 0.9989 | EXP 150 of 150 | 111.1726 | 0.0358 | 0.9047 | EXP 150 of 150 |    |    |  |  |
| 15D10112                    | 7.6 %  | 0.0718131 | 0.0006545 | 0.0914 | EXP 150 of 150 | 12.9394 | 0.0321 | 0.8416 | EXP 150 of 150 | 1.8780265 | 0.0271965 | 0.1010 | EXP 150 of 150 | 158.6320 | 0.0364 | 0.9988 | EXP 150 of 150 | 97.9882  | 0.0359 | 0.7867 | EXP 150 of 150 |    |    |  |  |
| 15D10113                    | 8.4 %  | 0.0531295 | 0.0005623 | 0.2309 | EXP 150 of 150 | 8.3130  | 0.0295 | 0.7326 | EXP 150 of 150 | 1.1775019 | 0.0272050 | 0.0738 | EXP 150 of 150 | 97.7170  | 0.0375 | 0.9967 | EXP 150 of 150 | 62.9501  | 0.0334 | 0.8014 | EXP 150 of 150 |    |    |  |  |
| 15D10114                    | 9.4 %  | 0.0875444 | 0.0006925 | 0.0374 | EXP 150 of 150 | 15.3635 | 0.0315 | 0.8921 | EXP 150 of 150 | 1.8617817 | 0.0271274 | 0.1408 | EXP 149 of 150 | 147.9565 | 0.0357 | 0.9987 | EXP 150 of 150 | 94.2638  | 0.0340 | 0.7449 | EXP 150 of 150 |    |    |  |  |
| 15D10116                    | 10.5 % | 0.0652129 | 0.0006143 | 0.0684 | EXP 150 of 150 | 9.9360  | 0.0324 | 0.7440 | EXP 150 of 150 | 1.1670018 | 0.0258452 | 0.0916 | EXP 150 of 150 | 91.1447  | 0.0306 | 0.9974 | EXP 150 of 150 | 60.8912  | 0.0291 | 0.8354 | EXP 150 of 150 |    |    |  |  |
| 15D10117                    | 11.7 % | 0.0580410 | 0.0006248 | 0.1836 | EXP 150 of 150 | 8.2846  | 0.0325 | 0.6698 | EXP 150 of 150 | 0.9341354 | 0.0261448 | 0.0500 | EXP 150 of 150 | 72.0818  | 0.0296 | 0.9962 | EXP 150 of 150 | 49.9128  | 0.0352 | 0.8964 | EXP 150 of 150 |    |    |  |  |
| 15D10118                    | 13.1 % | 0.0621055 | 0.0005990 | 0.1316 | EXP 150 of 150 | 9.5098  | 0.0305 | 0.7610 | EXP 150 of 150 | 0.7645130 | 0.0243378 | 0.0040 | EXP 150 of 150 | 62.9567  | 0.0290 | 0.9951 | EXP 150 of 150 | 44.6012  | 0.0330 | 0.9376 | EXP 150 of 150 |    |    |  |  |
| 15D10120                    | 14.7 % | 0.0528096 | 0.0005714 | 0.0723 | EXP 150 of 150 | 8.8086  | 0.0306 | 0.6925 | EXP 150 of 150 | 0.4821404 | 0.0277806 | 0.0225 | EXP 150 of 150 | 34.8113  | 0.0280 | 0.9850 | EXP 150 of 150 | 27.1012  | 0.0297 | 0.9767 | EXP 149 of 150 |    |    |  |  |
| 15D10121                    | 16.5 % | 0.0520687 | 0.0005203 | 0.0831 | EXP 150 of 150 | 10.2103 | 0.0286 | 0.7978 | EXP 150 of 150 | 0.3471043 | 0.0263454 | 0.0000 | EXP 150 of 150 | 26.2612  | 0.0269 | 0.9753 | EXP 150 of 150 | 21.4459  | 0.0275 | 0.9841 | EXP 150 of 150 |    |    |  |  |
| 15D10122                    | 18.5 % | 0.0609374 | 0.0005768 | 0.0470 | EXP 150 of 150 | 15.4090 | 0.0333 | 0.8727 | EXP 150 of 150 | 0.3409076 | 0.0292867 | 0.0054 | EXP 150 of 150 | 23.3215  | 0.0267 | 0.9692 | EXP 150 of 150 | 19.6967  | 0.0284 | 0.9842 | EXP 150 of 150 |    |    |  |  |
| 15D10124                    | 19.8 % | 0.0544899 | 0.0005536 | 0.0405 | EXP 150 of 150 | 14.0349 | 0.0293 | 0.8811 | EXP 150 of 150 | 0.1973139 | 0.0292999 | 0.0085 | EXP 150 of 150 | 15.4223  | 0.0246 | 0.9306 | EXP 150 of 150 | 15.6566  | 0.0265 | 0.9865 | EXP 150 of 150 |    |    |  |  |
| 15D10125                    | 21.7 % | 0.0561832 | 0.0006365 | 0.0474 | EXP 150 of 150 | 16.1128 | 0.0340 | 0.8762 | EXP 150 of 150 | 0.1969086 | 0.0285985 | 0.0000 | EXP 150 of 150 | 12.5999  | 0.0235 | 0.9181 | EXP 150 of 150 | 14.0252  | 0.0306 | 0.9840 | EXP 150 of 150 |    |    |  |  |
| 15D10126                    | 22.8 % | 0.0477795 | 0.0005534 | 0.0698 | EXP 150 of 150 | 11.2676 | 0.0282 | 0.8498 | EXP 149 of 150 | 0.1342072 | 0.0265288 | 0.0034 | EXP 150 of 150 | 9.0060   | 0.0282 | 0.7837 | EXP 150 of 150 | 12.3901  | 0.0264 | 0.9878 | EXP 150 of 150 |    |    |  |  |
| 15D10128                    | 24.3 % | 0.0410982 | 0.0004933 | 0.1075 | EXP 150 of 150 | 7.8332  | 0.0295 | 0.6689 | EXP 150 of 150 | 0.0503349 | 0.0271083 | 0.0088 | EXP 150 of 150 | 6.0999   | 0.0223 | 0.7318 | EXP 150 of 150 | 10.7883  | 0.0280 | 0.9860 | EXP 150 of 150 |    |    |  |  |



| OSU Argon Geochronology Lab |        |            |            |                   |             |      |                  |                  |       |                     |                    |       |            |       |               |       |             |       |              |                        |     |       |      |      |     |        |             |       |       |         |
|-----------------------------|--------|------------|------------|-------------------|-------------|------|------------------|------------------|-------|---------------------|--------------------|-------|------------|-------|---------------|-------|-------------|-------|--------------|------------------------|-----|-------|------|------|-----|--------|-------------|-------|-------|---------|
| Sample Parameters           |        | Sample     | Material   | Location          | Analyst     | Temp | Standard Name    | Standard (in Ma) | %1σ   | Standard Reference  | Standard 40Ar/39Ar | %1σ   | J          | %1σ   | Air 40Ar/36Ar | %1σ   | MDF (lin)   | %1σ   | Volume Ratio | Sensitivity (mol/volt) | Day | Month | Year | Hour | Min | Resist | Irradiation | X-pos | Y-pos | Z/H-pos |
| 15D10088                    | 2.0 %  | 1180044-1a | Groundmass | Kerguelen Plateau | Dan Miggins | 2    | FCT-NM (7B22-14) | 28.201           | 0.082 | Kuiper et al (2008) | 8.82254            | 0.116 | 0.00178150 | 0.116 | 303.409       | 0.117 | 0.993474796 | 0.065 | 1            | 4.8E-14                | 1   | APR   | 2015 | 4    | 33  | 1      | 14-OSU-07   | 0.00  | 0.00  | 30.00   |
| 15D10090                    | 2.2 %  | 1180044-1a | Groundmass | Kerguelen Plateau | Dan Miggins | 2.2  | FCT-NM (7B22-14) | 28.201           | 0.082 | Kuiper et al (2008) | 8.82254            | 0.116 | 0.00178150 | 0.116 | 303.409       | 0.117 | 0.993474796 | 0.065 | 1            | 4.8E-14                | 1   | APR   | 2015 | 5    | 0   | 1      | 14-OSU-07   | 0.00  | 0.00  | 30.00   |
| 15D10091                    | 2.4 %  | 1180044-1a | Groundmass | Kerguelen Plateau | Dan Miggins | 2.4  | FCT-NM (7B22-14) | 28.201           | 0.082 | Kuiper et al (2008) | 8.82254            | 0.116 | 0.00178150 | 0.116 | 303.409       | 0.117 | 0.993474796 | 0.065 | 1            | 4.8E-14                | 1   | APR   | 2015 | 5    | 15  | 1      | 14-OSU-07   | 0.00  | 0.00  | 30.00   |
| 15D10092                    | 2.6 %  | 1180044-1a | Groundmass | Kerguelen Plateau | Dan Miggins | 2.6  | FCT-NM (7B22-14) | 28.201           | 0.082 | Kuiper et al (2008) | 8.82254            | 0.116 | 0.00178150 | 0.116 | 303.409       | 0.117 | 0.993474796 | 0.065 | 1            | 4.8E-14                | 1   | APR   | 2015 | 5    | 29  | 1      | 14-OSU-07   | 0.00  | 0.00  | 30.00   |
| 15D10094                    | 2.8 %  | 1180044-1a | Groundmass | Kerguelen Plateau | Dan Miggins | 2.8  | FCT-NM (7B22-14) | 28.201           | 0.082 | Kuiper et al (2008) | 8.82254            | 0.116 | 0.00178150 | 0.116 | 303.409       | 0.117 | 0.993474796 | 0.065 | 1            | 4.8E-14                | 1   | APR   | 2015 | 5    | 56  | 1      | 14-OSU-07   | 0.00  | 0.00  | 30.00   |
| 15D10095                    | 3.0 %  | 1180044-1a | Groundmass | Kerguelen Plateau | Dan Miggins | 3    | FCT-NM (7B22-14) | 28.201           | 0.082 | Kuiper et al (2008) | 8.82254            | 0.116 | 0.00178150 | 0.116 | 303.409       | 0.117 | 0.993474796 | 0.065 | 1            | 4.8E-14                | 1   | APR   | 2015 | 6    | 10  | 1      | 14-OSU-07   | 0.00  | 0.00  | 30.00   |
| 15D10096                    | 3.3 %  | 1180044-1a | Groundmass | Kerguelen Plateau | Dan Miggins | 3.3  | FCT-NM (7B22-14) | 28.201           | 0.082 | Kuiper et al (2008) | 8.82254            | 0.116 | 0.00178150 | 0.116 | 303.409       | 0.117 | 0.993474796 | 0.065 | 1            | 4.8E-14                | 1   | APR   | 2015 | 6    | 24  | 1      | 14-OSU-07   | 0.00  | 0.00  | 30.00   |
| 15D10097                    | 3.6 %  | 1180044-1a | Groundmass | Kerguelen Plateau | Dan Miggins | 3.6  | FCT-NM (7B22-14) | 28.201           | 0.082 | Kuiper et al (2008) | 8.82254            | 0.116 | 0.00178150 | 0.116 | 303.409       | 0.117 | 0.993474796 | 0.065 | 1            | 4.8E-14                | 1   | APR   | 2015 | 6    | 37  | 1      | 14-OSU-07   | 0.00  | 0.00  | 30.00   |
| 15D10099                    | 3.9 %  | 1180044-1a | Groundmass | Kerguelen Plateau | Dan Miggins | 3.9  | FCT-NM (7B22-14) | 28.201           | 0.082 | Kuiper et al (2008) | 8.82254            | 0.116 | 0.00178150 | 0.116 | 303.409       | 0.117 | 0.993474796 | 0.065 | 1            | 4.8E-14                | 1   | APR   | 2015 | 7    | 3   | 1      | 14-OSU-07   | 0.00  | 0.00  | 30.00   |
| 15D10100                    | 4.3 %  | 1180044-1a | Groundmass | Kerguelen Plateau | Dan Miggins | 4.3  | FCT-NM (7B22-14) | 28.201           | 0.082 | Kuiper et al (2008) | 8.82254            | 0.116 | 0.00178150 | 0.116 | 303.409       | 0.117 | 0.993474796 | 0.065 | 1            | 4.8E-14                | 1   | APR   | 2015 | 7    | 17  | 1      | 14-OSU-07   | 0.00  | 0.00  | 30.00   |
| 15D10101                    | 4.6 %  | 1180044-1a | Groundmass | Kerguelen Plateau | Dan Miggins | 4.6  | FCT-NM (7B22-14) | 28.201           | 0.082 | Kuiper et al (2008) | 8.82254            | 0.116 | 0.00178150 | 0.116 | 303.409       | 0.117 | 0.993474796 | 0.065 | 1            | 4.8E-14                | 1   | APR   | 2015 | 7    | 29  | 1      | 14-OSU-07   | 0.00  | 0.00  | 30.00   |
| 15D10102                    | 4.9 %  | 1180044-1a | Groundmass | Kerguelen Plateau | Dan Miggins | 4.9  | FCT-NM (7B22-14) | 28.201           | 0.082 | Kuiper et al (2008) | 8.82254            | 0.116 | 0.00178150 | 0.116 | 303.409       | 0.117 | 0.993474796 | 0.065 | 1            | 4.8E-14                | 1   | APR   | 2015 | 7    | 42  | 1      | 14-OSU-07   | 0.00  | 0.00  | 30.00   |
| 15D10104                    | 5.2 %  | 1180044-1a | Groundmass | Kerguelen Plateau | Dan Miggins | 5.2  | FCT-NM (7B22-14) | 28.201           | 0.082 | Kuiper et al (2008) | 8.82254            | 0.116 | 0.00178150 | 0.116 | 303.409       | 0.117 | 0.993474796 | 0.065 | 1            | 4.8E-14                | 1   | APR   | 2015 | 8    | 7   | 1      | 14-OSU-07   | 0.00  | 0.00  | 30.00   |
| 15D10105                    | 5.5 %  | 1180044-1a | Groundmass | Kerguelen Plateau | Dan Miggins | 5.5  | FCT-NM (7B22-14) | 28.201           | 0.082 | Kuiper et al (2008) | 8.82254            | 0.116 | 0.00178150 | 0.116 | 303.409       | 0.117 | 0.993474796 | 0.065 | 1            | 4.8E-14                | 1   | APR   | 2015 | 8    | 19  | 1      | 14-OSU-07   | 0.00  | 0.00  | 30.00   |
| 15D10106                    | 5.8 %  | 1180044-1a | Groundmass | Kerguelen Plateau | Dan Miggins | 5.8  | FCT-NM (7B22-14) | 28.201           | 0.082 | Kuiper et al (2008) | 8.82254            | 0.116 | 0.00178150 | 0.116 | 303.409       | 0.117 | 0.993474796 | 0.065 | 1            | 4.8E-14                | 1   | APR   | 2015 | 8    | 32  | 1      | 14-OSU-07   | 0.00  | 0.00  | 30.00   |
| 15D10108                    | 6.1 %  | 1180044-1a | Groundmass | Kerguelen Plateau | Dan Miggins | 6.1  | FCT-NM (7B22-14) | 28.201           | 0.082 | Kuiper et al (2008) | 8.82254            | 0.116 | 0.00178150 | 0.116 | 303.409       | 0.117 | 0.993474796 | 0.065 | 1            | 4.8E-14                | 1   | APR   | 2015 | 8    | 57  | 1      | 14-OSU-07   | 0.00  | 0.00  | 30.00   |
| 15D10109                    | 6.5 %  | 1180044-1a | Groundmass | Kerguelen Plateau | Dan Miggins | 6.5  | FCT-NM (7B22-14) | 28.201           | 0.082 | Kuiper et al (2008) | 8.82254            | 0.116 | 0.00178150 | 0.116 | 303.409       | 0.117 | 0.993474796 | 0.065 | 1            | 4.8E-14                | 1   | APR   | 2015 | 9    | 9   | 1      | 14-OSU-07   | 0.00  | 0.00  | 30.00   |
| 15D10110                    | 7.0 %  | 1180044-1a | Groundmass | Kerguelen Plateau | Dan Miggins | 7    | FCT-NM (7B22-14) | 28.201           | 0.082 | Kuiper et al (2008) | 8.82254            | 0.116 | 0.00178150 | 0.116 | 303.409       | 0.117 | 0.993474796 | 0.065 | 1            | 4.8E-14                | 1   | APR   | 2015 | 9    | 22  | 1      | 14-OSU-07   | 0.00  | 0.00  | 30.00   |
| 15D10112                    | 7.6 %  | 1180044-1a | Groundmass | Kerguelen Plateau | Dan Miggins | 7.6  | FCT-NM (7B22-14) | 28.201           | 0.082 | Kuiper et al (2008) | 8.82254            | 0.116 | 0.00178150 | 0.116 | 303.409       | 0.117 | 0.993474796 | 0.065 | 1            | 4.8E-14                | 1   | APR   | 2015 | 9    | 47  | 1      | 14-OSU-07   | 0.00  | 0.00  | 30.00   |
| 15D10113                    | 8.4 %  | 1180044-1a | Groundmass | Kerguelen Plateau | Dan Miggins | 8.4  | FCT-NM (7B22-14) | 28.201           | 0.082 | Kuiper et al (2008) | 8.82254            | 0.116 | 0.00178150 | 0.116 | 303.409       | 0.117 | 0.993474796 | 0.065 | 1            | 4.8E-14                | 1   | APR   | 2015 | 9    | 59  | 1      | 14-OSU-07   | 0.00  | 0.00  | 30.00   |
| 15D10114                    | 9.4 %  | 1180044-1a | Groundmass | Kerguelen Plateau | Dan Miggins | 9.4  | FCT-NM (7B22-14) | 28.201           | 0.082 | Kuiper et al (2008) | 8.82254            | 0.116 | 0.00178150 | 0.116 | 303.409       | 0.117 | 0.993474796 | 0.065 | 1            | 4.8E-14                | 1   | APR   | 2015 | 10   | 12  | 1      | 14-OSU-07   | 0.00  | 0.00  | 30.00   |
| 15D10116                    | 10.5 % | 1180044-1a | Groundmass | Kerguelen Plateau | Dan Miggins | 10.5 | FCT-NM (7B22-14) | 28.201           | 0.082 | Kuiper et al (2008) | 8.82254            | 0.116 | 0.00178150 | 0.116 | 303.409       | 0.117 | 0.993474796 | 0.065 | 1            | 4.8E-14                | 1   | APR   | 2015 | 10   | 37  | 1      | 14-OSU-07   | 0.00  | 0.00  | 30.00   |
| 15D10117                    | 11.7 % | 1180044-1a | Groundmass | Kerguelen Plateau | Dan Miggins | 11.7 | FCT-NM (7B22-14) | 28.201           | 0.082 | Kuiper et al (2008) | 8.82254            | 0.116 | 0.00178150 | 0.116 | 303.409       | 0.117 | 0.993474796 | 0.065 | 1            | 4.8E-14                | 1   | APR   | 2015 | 10   | 49  | 1      | 14-OSU-07   | 0.00  | 0.00  | 30.00   |
| 15D10118                    | 13.1 % | 1180044-1a | Groundmass | Kerguelen Plateau | Dan Miggins | 13.1 | FCT-NM (7B22-14) | 28.201           | 0.082 | Kuiper et al (2008) | 8.82254            | 0.116 | 0.00178150 | 0.116 | 303.409       | 0.117 | 0.993474796 | 0.065 | 1            | 4.8E-14                | 1   | APR   | 2015 | 11   | 2   | 1      | 14-OSU-07   | 0.00  | 0.00  | 30.00   |
| 15D10120                    | 14.7 % | 1180044-1a | Groundmass | Kerguelen Plateau | Dan Miggins | 14.7 | FCT-NM (7B22-14) | 28.201           | 0.082 | Kuiper et al (2008) | 8.82254            | 0.116 | 0.00178150 | 0.116 | 303.409       | 0.117 | 0.993474796 | 0.065 | 1            | 4.8E-14                | 1   | APR   | 2015 | 11   | 27  | 1      | 14-OSU-07   | 0.00  | 0.00  | 30.00   |
| 15D10121                    | 16.5 % | 1180044-1a | Groundmass | Kerguelen Plateau | Dan Miggins | 16.5 | FCT-NM (7B22-14) | 28.201           | 0.082 | Kuiper et al (2008) | 8.82254            | 0.116 | 0.00178150 | 0.116 | 303.409       | 0.117 | 0.993474796 | 0.065 | 1            | 4.8E-14                | 1   | APR   | 2015 | 11   | 39  | 1      | 14-OSU-07   | 0.00  | 0.00  | 30.00   |
| 15D10122                    | 18.5 % | 1180044-1a | Groundmass | Kerguelen Plateau | Dan Miggins | 18.5 | FCT-NM (7B22-14) | 28.201           | 0.082 | Kuiper et al (2008) | 8.82254            | 0.116 | 0.00178150 | 0.116 | 303.409       | 0.117 | 0.993474796 | 0.065 | 1            | 4.8E-14                | 1   | APR   | 2015 | 11   | 52  | 1      | 14-OSU-07   | 0.00  | 0.00  | 30.00   |
| 15D10124                    | 19.8 % | 1180044-1a | Groundmass | Kerguelen Plateau | Dan Miggins | 19.8 | FCT-NM (7B22-14) | 28.201           | 0.082 | Kuiper et al (2008) | 8.82254            | 0.116 | 0.00178150 | 0.116 | 303.409       | 0.117 | 0.993474796 | 0.065 | 1            | 4.8E-14                | 1   | APR   | 2015 | 12   | 18  | 1      | 14-OSU-07   | 0.00  | 0.00  | 30.00   |
| 15D10125                    | 21.7 % | 1180044-1a | Groundmass | Kerguelen Plateau | Dan Miggins | 21.7 | FCT-NM (7B22-14) | 28.201           | 0.082 | Kuiper et al (2008) | 8.82254            | 0.116 | 0.00178150 | 0.116 | 303.409       | 0.117 | 0.993474796 | 0.065 | 1            | 4.8E-14                | 1   | APR   | 2015 | 12   | 31  | 1      | 14-OSU-07   | 0.00  | 0.00  | 30.00   |
| 15D10126                    | 22.8 % | 1180044-1a | Groundmass | Kerguelen Plateau | Dan Miggins | 22.8 | FCT-NM (7B22-14) | 28.201           | 0.082 | Kuiper et al (2008) | 8.82254            | 0.116 | 0.00178150 | 0.116 | 303.409       | 0.117 | 0.993474796 | 0.065 | 1            | 4.8E-14                | 1   | APR   | 2015 | 12   | 44  | 1      | 14-OSU-07   | 0.00  | 0.00  | 30.00   |
| 15D10128                    | 24.3 % | 1180044-1a | Groundmass | Kerguelen Plateau | Dan Miggins | 24.3 | FCT-NM (7B22-14) | 28.201           | 0.082 | Kuiper et al (2008) | 8.82254            | 0.116 | 0.00178150 | 0.116 | 303.409       | 0.117 | 0.993474796 | 0.065 | 1            | 4.8E-14                | 1   | APR   | 2015 | 13   | 9   | 1      | 14-OSU-07   | 0.00  | 0.00  | 30.00   |



[illegible]



| OSU Argon Geochronology Lab |          |       |          |       |          |        |          |       |           |          |           |           |           |          |          |         |          |         |           |     |      |      |      |     |       |     |   |
|-----------------------------|----------|-------|----------|-------|----------|--------|----------|-------|-----------|----------|-----------|-----------|-----------|----------|----------|---------|----------|---------|-----------|-----|------|------|------|-----|-------|-----|---|
| Irradiation<br>Constants    |          |       |          |       |          |        |          |       |           |          |           |           |           |          |          |         |          |         |           |     |      |      |      |     |       |     |   |
|                             | 40/36(a) | %1σ   | 40/36(c) | %1σ   | 38/36(a) | %1σ    | 38/36(c) | %1σ   | 39/37(ca) | %1σ      | 38/37(ca) | %1σ       | 36/37(ca) | %1σ      | 40/39(k) | %1σ     | 38/39(k) | %1σ     | 36/38(cl) | %1σ | K/Ca | %1σ  | K/Cl | %1σ | Ca/Cl | %1σ |   |
| 15D10088                    | 2.0 %    | 295.5 | 0        | 0.018 | 35       | 0.1869 | 0        | 1.493 | 3         | 0.000673 | 0         | 0.0000139 | 0         | 0.000264 | 0        | 0.00101 | 0        | 0.01138 | 0         | 0   | 0    | 0.43 | 0    | 0   | 0     | 0   | 0 |
| 15D10090                    | 2.2 %    | 295.5 | 0        | 0.018 | 35       | 0.1869 | 0        | 1.493 | 3         | 0.000673 | 0         | 0.0000139 | 0         | 0.000264 | 0        | 0.00101 | 0        | 0.01138 | 0         | 0   | 0    | 0.43 | 0    | 0   | 0     | 0   | 0 |
| 15D10091                    | 2.4 %    | 295.5 | 0        | 0.018 | 35       | 0.1869 | 0        | 1.493 | 3         | 0.000673 | 0         | 0.0000139 | 0         | 0.000264 | 0        | 0.00101 | 0        | 0.01138 | 0         | 0   | 0    | 0.43 | 0    | 0   | 0     | 0   | 0 |
| 15D10092                    | 2.6 %    | 295.5 | 0        | 0.018 | 35       | 0.1869 | 0        | 1.493 | 3         | 0.000673 | 0         | 0.0000139 | 0         | 0.000264 | 0        | 0.00101 | 0        | 0.01138 | 0         | 0   | 0    | 0.43 | 0    | 0   | 0     | 0   | 0 |
| 15D10094                    | 2.8 %    | 295.5 | 0        | 0.018 | 35       | 0.1869 | 0        | 1.493 | 3         | 0.000673 | 0         | 0.0000139 | 0         | 0.000264 | 0        | 0.00101 | 0        | 0.01138 | 0         | 0   | 0    | 0.43 | 0    | 0   | 0     | 0   | 0 |
| 15D10095                    | 3.0 %    | 295.5 | 0        | 0.018 | 35       | 0.1869 | 0        | 1.493 | 3         | 0.000673 | 0         | 0.0000139 | 0         | 0.000264 | 0        | 0.00101 | 0        | 0.01138 | 0         | 0   | 0    | 0.43 | 0    | 0   | 0     | 0   | 0 |
| 15D10096                    | 3.3 %    | 295.5 | 0        | 0.018 | 35       | 0.1869 | 0        | 1.493 | 3         | 0.000673 | 0         | 0.0000139 | 0         | 0.000264 | 0        | 0.00101 | 0        | 0.01138 | 0         | 0   | 0    | 0.43 | 0    | 0   | 0     | 0   | 0 |
| 15D10097                    | 3.6 %    | 295.5 | 0        | 0.018 | 35       | 0.1869 | 0        | 1.493 | 3         | 0.000673 | 0         | 0.0000139 | 0         | 0.000264 | 0        | 0.00101 | 0        | 0.01138 | 0         | 0   | 0    | 0.43 | 0    | 0   | 0     | 0   | 0 |
| 15D10099                    | 3.9 %    | 295.5 | 0        | 0.018 | 35       | 0.1869 | 0        | 1.493 | 3         | 0.000673 | 0         | 0.0000139 | 0         | 0.000264 | 0        | 0.00101 | 0        | 0.01138 | 0         | 0   | 0    | 0.43 | 0    | 0   | 0     | 0   | 0 |
| 15D10100                    | 4.3 %    | 295.5 | 0        | 0.018 | 35       | 0.1869 | 0        | 1.493 | 3         | 0.000673 | 0         | 0.0000139 | 0         | 0.000264 | 0        | 0.00101 | 0        | 0.01138 | 0         | 0   | 0    | 0.43 | 0    | 0   | 0     | 0   | 0 |
| 15D10101                    | 4.6 %    | 295.5 | 0        | 0.018 | 35       | 0.1869 | 0        | 1.493 | 3         | 0.000673 | 0         | 0.0000139 | 0         | 0.000264 | 0        | 0.00101 | 0        | 0.01138 | 0         | 0   | 0    | 0.43 | 0    | 0   | 0     | 0   | 0 |
| 15D10102                    | 4.9 %    | 295.5 | 0        | 0.018 | 35       | 0.1869 | 0        | 1.493 | 3         | 0.000673 | 0         | 0.0000139 | 0         | 0.000264 | 0        | 0.00101 | 0        | 0.01138 | 0         | 0   | 0    | 0.43 | 0    | 0   | 0     | 0   | 0 |
| 15D10104                    | 5.2 %    | 295.5 | 0        | 0.018 | 35       | 0.1869 | 0        | 1.493 | 3         | 0.000673 | 0         | 0.0000139 | 0         | 0.000264 | 0        | 0.00101 | 0        | 0.01138 | 0         | 0   | 0    | 0.43 | 0    | 0   | 0     | 0   | 0 |
| 15D10105                    | 5.5 %    | 295.5 | 0        | 0.018 | 35       | 0.1869 | 0        | 1.493 | 3         | 0.000673 | 0         | 0.0000139 | 0         | 0.000264 | 0        | 0.00101 | 0        | 0.01138 | 0         | 0   | 0    | 0.43 | 0    | 0   | 0     | 0   | 0 |
| 15D10106                    | 5.8 %    | 295.5 | 0        | 0.018 | 35       | 0.1869 | 0        | 1.493 | 3         | 0.000673 | 0         | 0.0000139 | 0         | 0.000264 | 0        | 0.00101 | 0        | 0.01138 | 0         | 0   | 0    | 0.43 | 0    | 0   | 0     | 0   | 0 |
| 15D10108                    | 6.1 %    | 295.5 | 0        | 0.018 | 35       | 0.1869 | 0        | 1.493 | 3         | 0.000673 | 0         | 0.0000139 | 0         | 0.000264 | 0        | 0.00101 | 0        | 0.01138 | 0         | 0   | 0    | 0.43 | 0    | 0   | 0     | 0   | 0 |
| 15D10109                    | 6.5 %    | 295.5 | 0        | 0.018 | 35       | 0.1869 | 0        | 1.493 | 3         | 0.000673 | 0         | 0.0000139 | 0         | 0.000264 | 0        | 0.00101 | 0        | 0.01138 | 0         | 0   | 0    | 0.43 | 0    | 0   | 0     | 0   | 0 |
| 15D10110                    | 7.0 %    | 295.5 | 0        | 0.018 | 35       | 0.1869 | 0        | 1.493 | 3         | 0.000673 | 0         | 0.0000139 | 0         | 0.000264 | 0        | 0.00101 | 0        | 0.01138 | 0         | 0   | 0    | 0.43 | 0    | 0   | 0     | 0   | 0 |
| 15D10112                    | 7.6 %    | 295.5 | 0        | 0.018 | 35       | 0.1869 | 0        | 1.493 | 3         | 0.000673 | 0         | 0.0000139 | 0         | 0.000264 | 0        | 0.00101 | 0        | 0.01138 | 0         | 0   | 0    | 0.43 | 0    | 0   | 0     | 0   | 0 |
| 15D10113                    | 8.4 %    | 295.5 | 0        | 0.018 | 35       | 0.1869 | 0        | 1.493 | 3         | 0.000673 | 0         | 0.0000139 | 0         | 0.000264 | 0        | 0.00101 | 0        | 0.01138 | 0         | 0   | 0    | 0.43 | 0    | 0   | 0     | 0   | 0 |
| 15D10114                    | 9.4 %    | 295.5 | 0        | 0.018 | 35       | 0.1869 | 0        | 1.493 | 3         | 0.000673 | 0         | 0.0000139 | 0         | 0.000264 | 0        | 0.00101 | 0        | 0.01138 | 0         | 0   | 0    | 0.43 | 0    | 0   | 0     | 0   | 0 |
| 15D10116                    | 10.5 %   | 295.5 | 0        | 0.018 | 35       | 0.1869 | 0        | 1.493 | 3         | 0.000673 | 0         | 0.0000139 | 0         | 0.000264 | 0        | 0.00101 | 0        | 0.01138 | 0         | 0   | 0    | 0.43 | 0    | 0   | 0     | 0   | 0 |
| 15D10117                    | 11.7 %   | 295.5 | 0        | 0.018 | 35       | 0.1869 | 0        | 1.493 | 3         | 0.000673 | 0         | 0.0000139 | 0         | 0.000264 | 0        | 0.00101 | 0        | 0.01138 | 0         | 0   | 0    | 0.43 | 0    | 0   | 0     | 0   | 0 |
| 15D10118                    | 13.1 %   | 295.5 | 0        | 0.018 | 35       | 0.1869 | 0        | 1.493 | 3         | 0.000673 | 0         | 0.0000139 | 0         | 0.000264 | 0        | 0.00101 | 0        | 0.01138 | 0         | 0   | 0    | 0.43 | 0    | 0   | 0     | 0   | 0 |
| 15D10120                    | 14.7 %   | 295.5 | 0        | 0.018 | 35       | 0.1869 | 0        | 1.493 | 3         | 0.000673 | 0         | 0.0000139 | 0         | 0.000264 | 0        | 0.00101 | 0        | 0.01138 | 0         | 0   | 0    | 0.43 | 0    | 0   | 0     | 0   | 0 |
| 15D10121                    | 16.5 %   | 295.5 | 0        | 0.018 | 35       | 0.1869 | 0        | 1.493 | 3         | 0.000673 | 0         | 0.0000139 | 0         | 0.000264 | 0        | 0.00101 | 0        | 0.01138 | 0         | 0   | 0    | 0.43 | 0    | 0   | 0     | 0   | 0 |
| 15D10122                    | 18.5 %   | 295.5 | 0        | 0.018 | 35       | 0.1869 | 0        | 1.493 | 3         | 0.000673 | 0         | 0.0000139 | 0         | 0.000264 | 0        | 0.00101 | 0        | 0.01138 | 0         | 0   | 0    | 0.43 | 0    | 0   | 0     | 0   | 0 |
| 15D10124                    | 19.8 %   | 295.5 | 0        | 0.018 | 35       | 0.1869 | 0        | 1.493 | 3         | 0.000673 | 0         | 0.0000139 | 0         | 0.000264 | 0        | 0.00101 | 0        | 0.01138 | 0         | 0   | 0    | 0.43 | 0    | 0   | 0     | 0   | 0 |
| 15D10125                    | 21.7 %   | 295.5 | 0        | 0.018 | 35       | 0.1869 | 0        | 1.493 | 3         | 0.000673 | 0         | 0.0000139 | 0         | 0.000264 | 0        | 0.00101 | 0        | 0.01138 | 0         | 0   | 0    | 0.43 | 0    | 0   | 0     | 0   | 0 |
| 15D10126                    | 22.8 %   | 295.5 | 0        | 0.018 | 35       | 0.1869 | 0        | 1.493 | 3         | 0.000673 | 0         | 0.0000139 | 0         | 0.000264 | 0        | 0.00101 | 0        | 0.01138 | 0         | 0   | 0    | 0.43 | 0    | 0   | 0     | 0   | 0 |
| 15D10128                    | 24.3 %   | 295.5 | 0        | 0.018 | 35       | 0.1869 | 0        | 1.493 | 3         | 0.000673 | 0         | 0.0000139 | 0         | 0.000264 | 0        | 0.00101 | 0        | 0.01138 | 0         | 0   | 0    | 0.43 | 0    | 0   | 0     | 0   | 0 |



15D10087.AGE >>> 1180044-1A >>> KERGUELEN | FALLOON (14-PIL-01) PROJECT

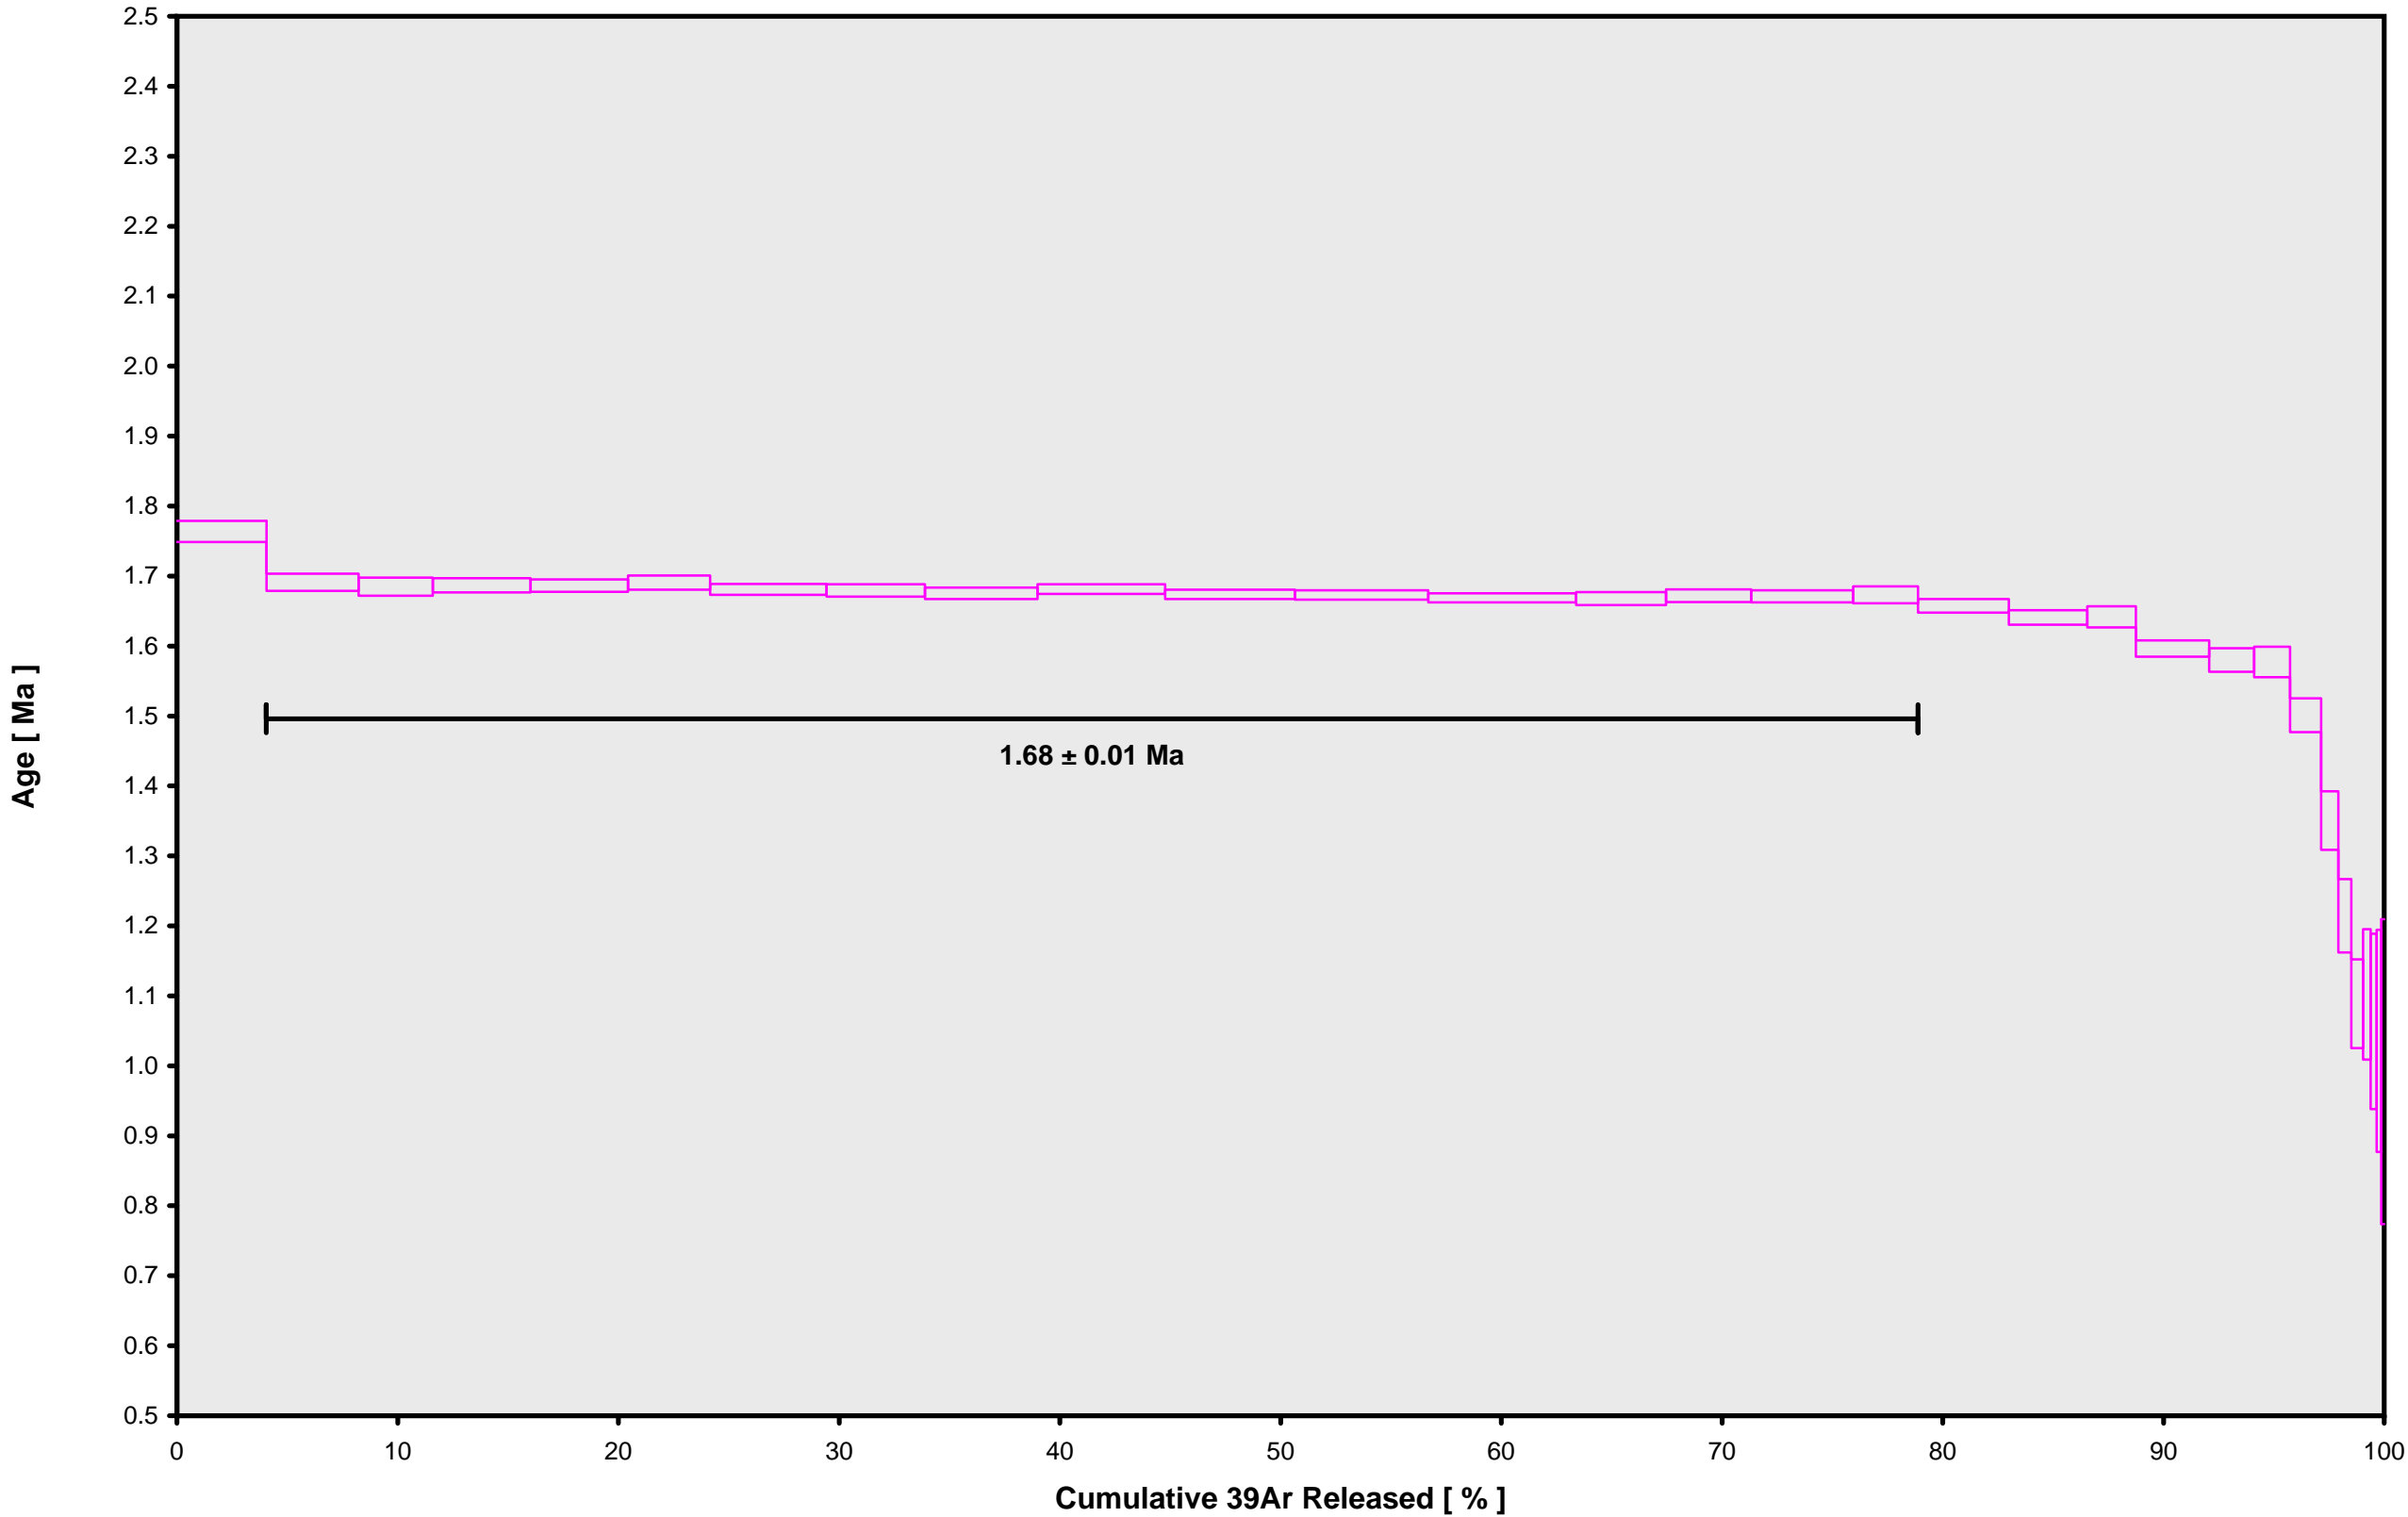

Ar-Ages in Ma

WEIGHTED PLATEAU

$1.68 \pm 0.01$

TOTAL FUSION

$1.66 \pm 0.00$

NORMAL ISOCHRON

$1.67 \pm 0.01$

INVERSE ISOCHRON

$1.67 \pm 0.01$

MSWD (PROBABILITY)

2.81 (0%)

Sample Info

Groundmass

Kerguelen Plateau

Dan Miggins

IRR = 14-OSU-07 (7B22-14)

J =  $0.00178150 \pm 0.00000207$



15D10087.AGE >>> 1180044-1A >>> KERGUELEN | FALLOON (14-PIL-01) PROJECT

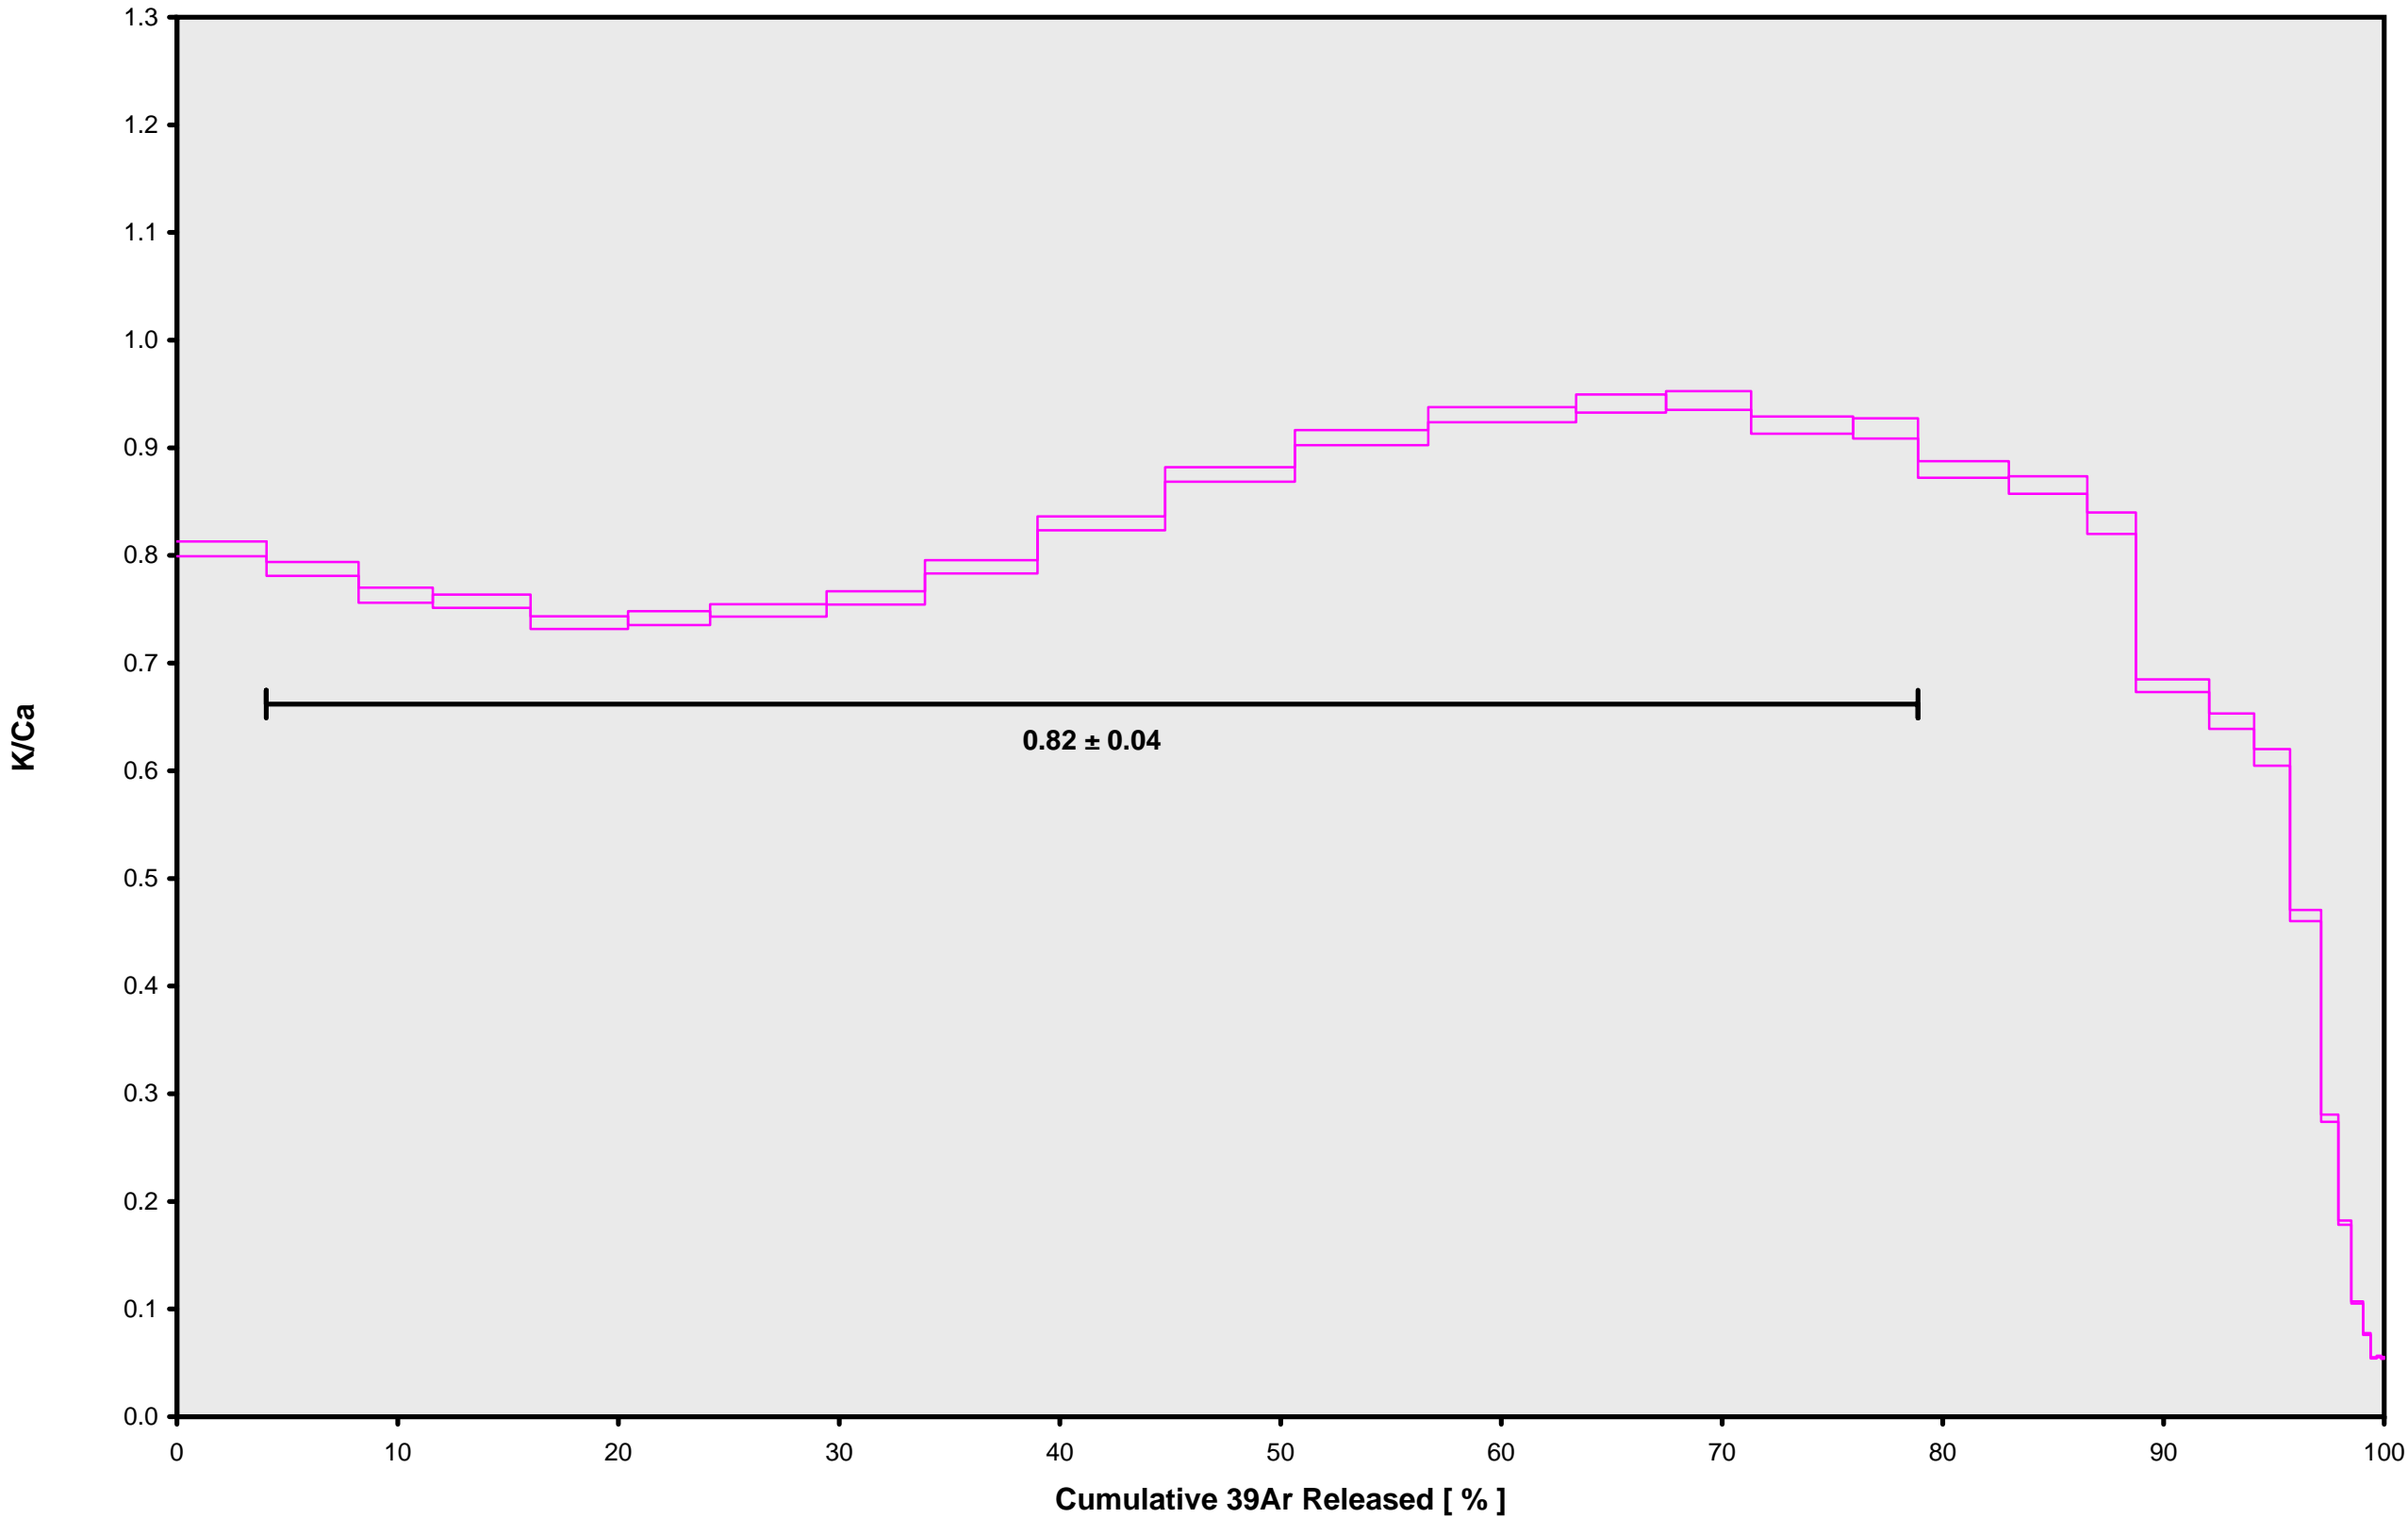

**Ar-Ages in Ma**

**WEIGHTED PLATEAU**

**$1.68 \pm 0.01$**

**TOTAL FUSION**

**$1.66 \pm 0.00$**

**NORMAL ISOCHRON**

**$1.67 \pm 0.01$**

**INVERSE ISOCHRON**

**$1.67 \pm 0.01$**

**Sample Info**

**Groundmass**

**Kerguelen Plateau**

**Dan Miggins**

**IRR = 14-OSU-07 (7B22-14)**

**$J = 0.00178150 \pm 0.00000207$**



15D10087.AGE >>> 1180044-1A >>> KERGUELEN | FALLOON (14-PIL-01) PROJECT

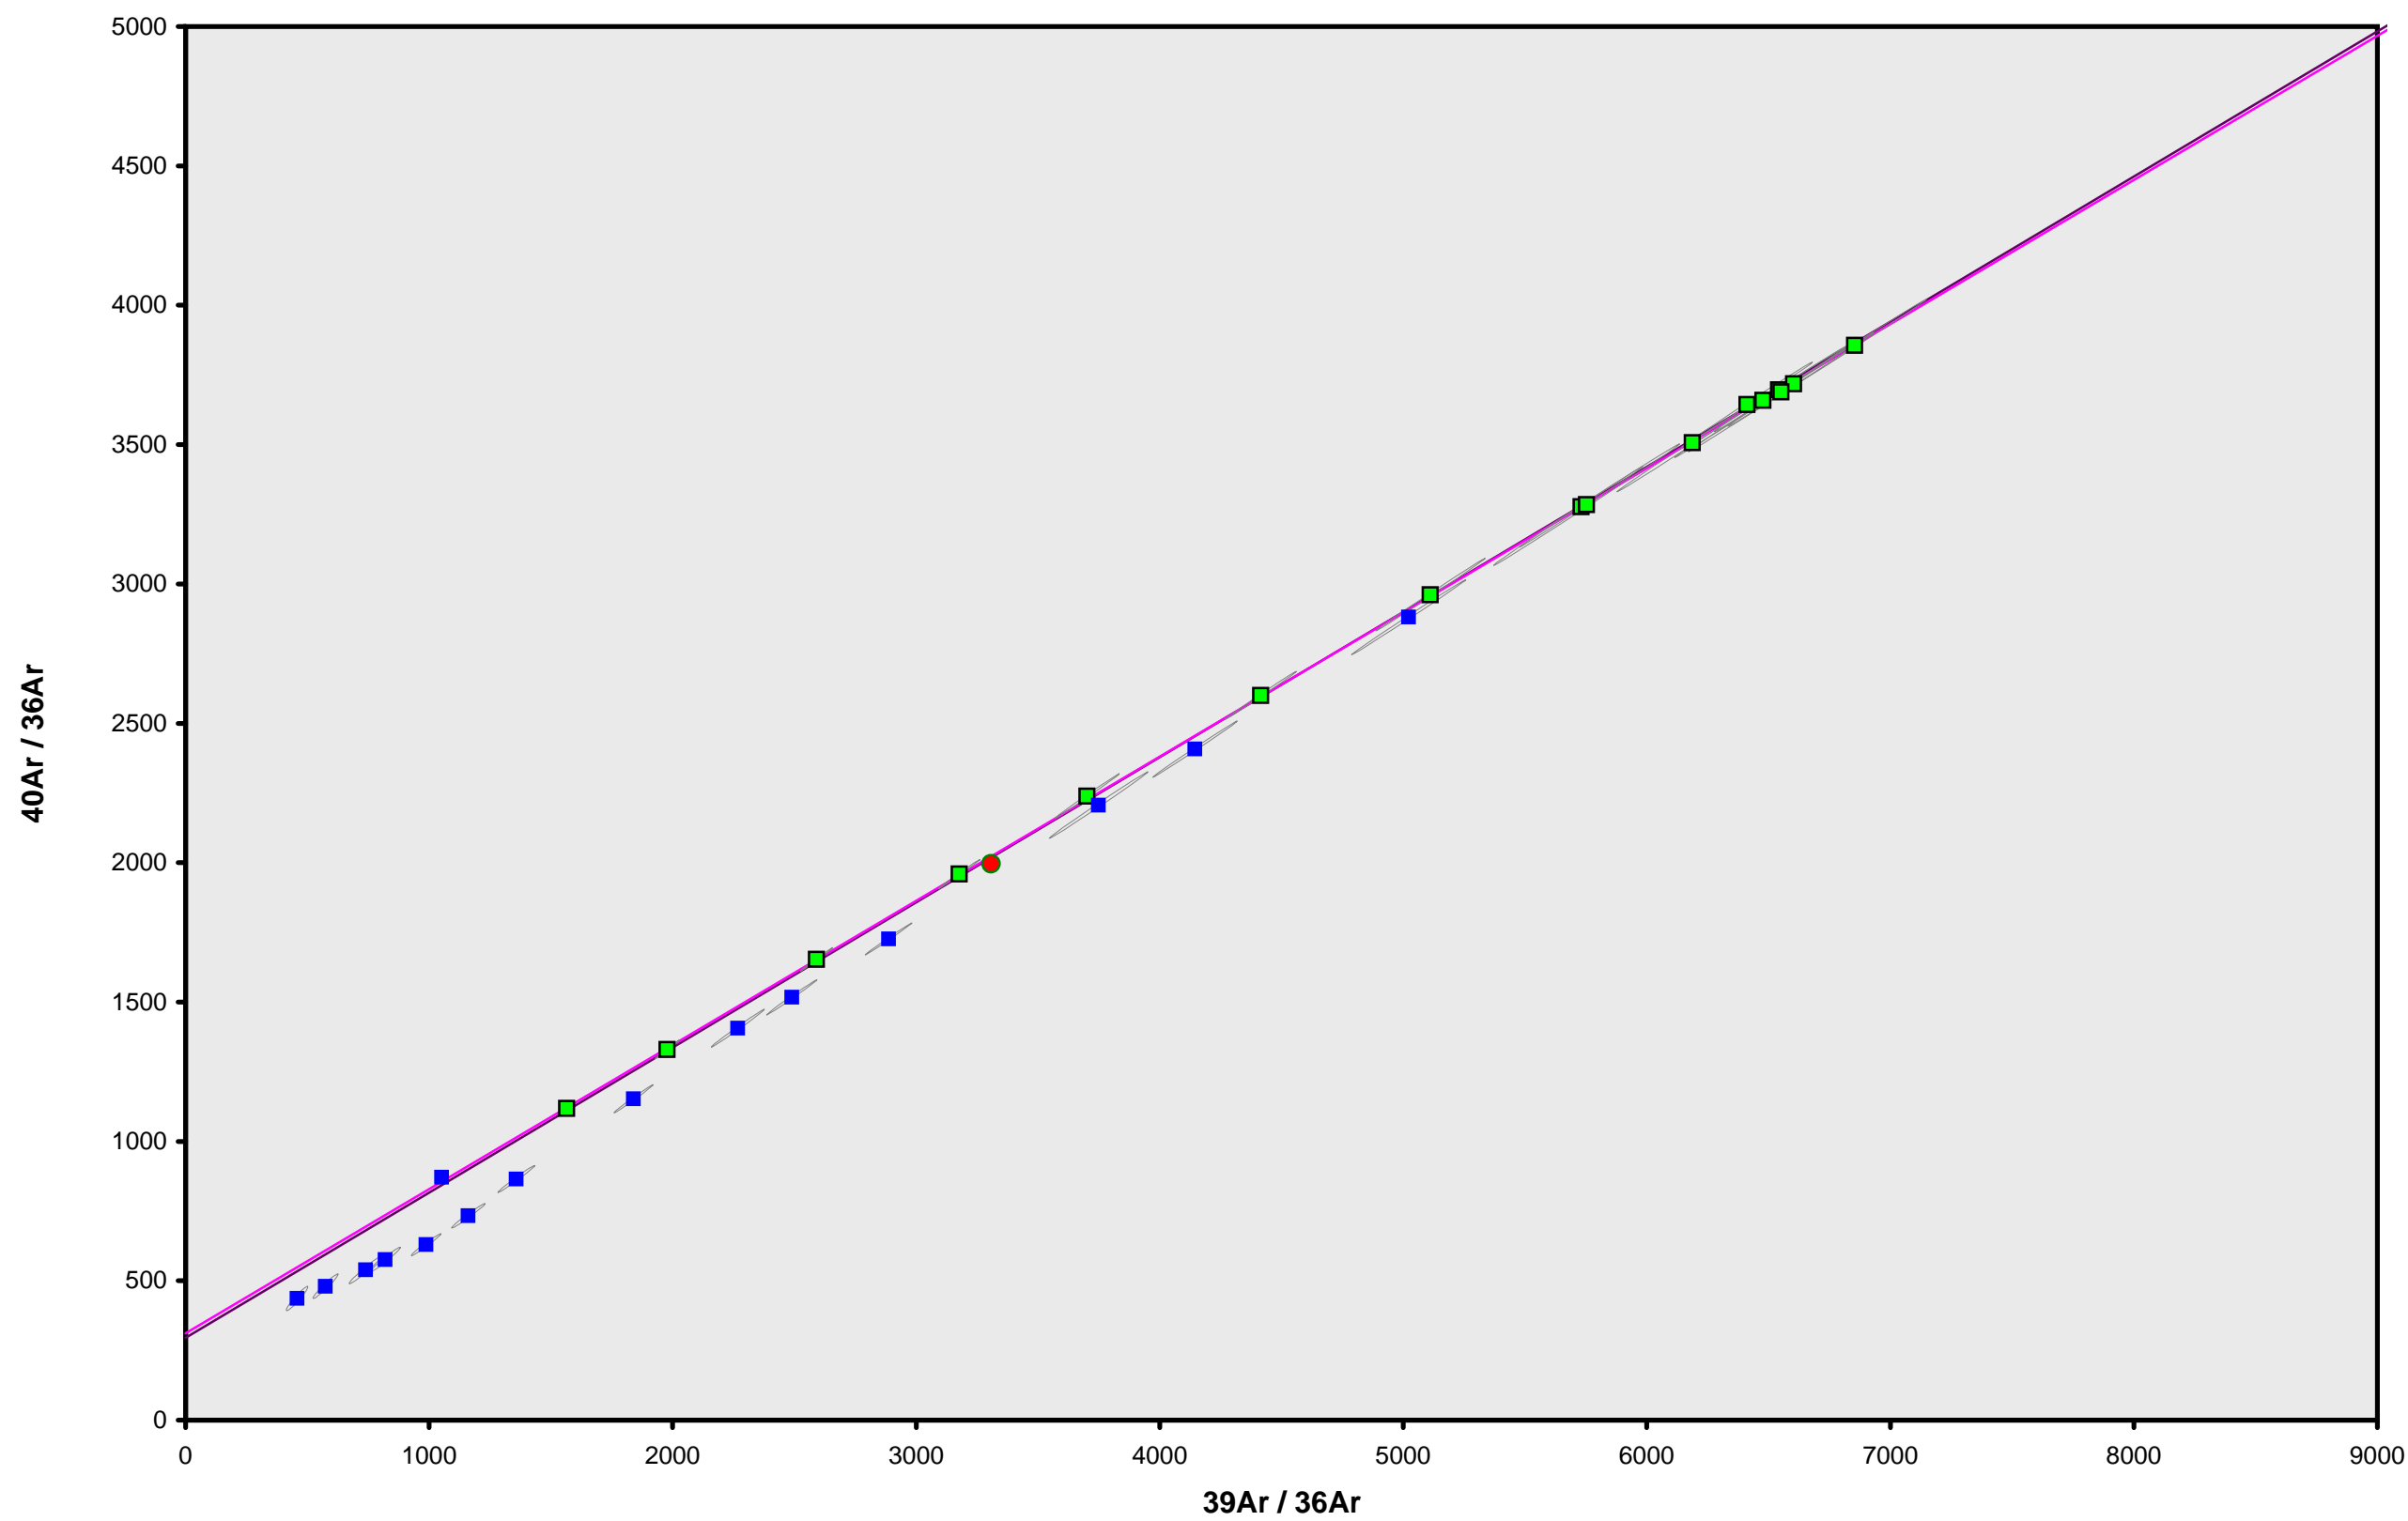

**Ar-Ages in Ma**

**WEIGHTED PLATEAU**  
1.68 ± 0.01

**TOTAL FUSION**  
1.66 ± 0.00

**NORMAL ISOCHRON**  
1.67 ± 0.01

**INVERSE ISOCHRON**  
1.67 ± 0.01

**MSWD (PROBABILITY)**  
1.25 (23%)

**40AR/36AR INTERCEPT**  
311.6 ± 6.9

**Sample Info**

Groundmass  
Kerguelen Plateau  
Dan Miggins

IRR = 14-OSU-07 (7B22-14)  
J = 0.00178150 ± 0.00000207



15D10087.AGE >>> 1180044-1A >>> KERGUELEN | FALLOON (14-PIL-01) PROJECT

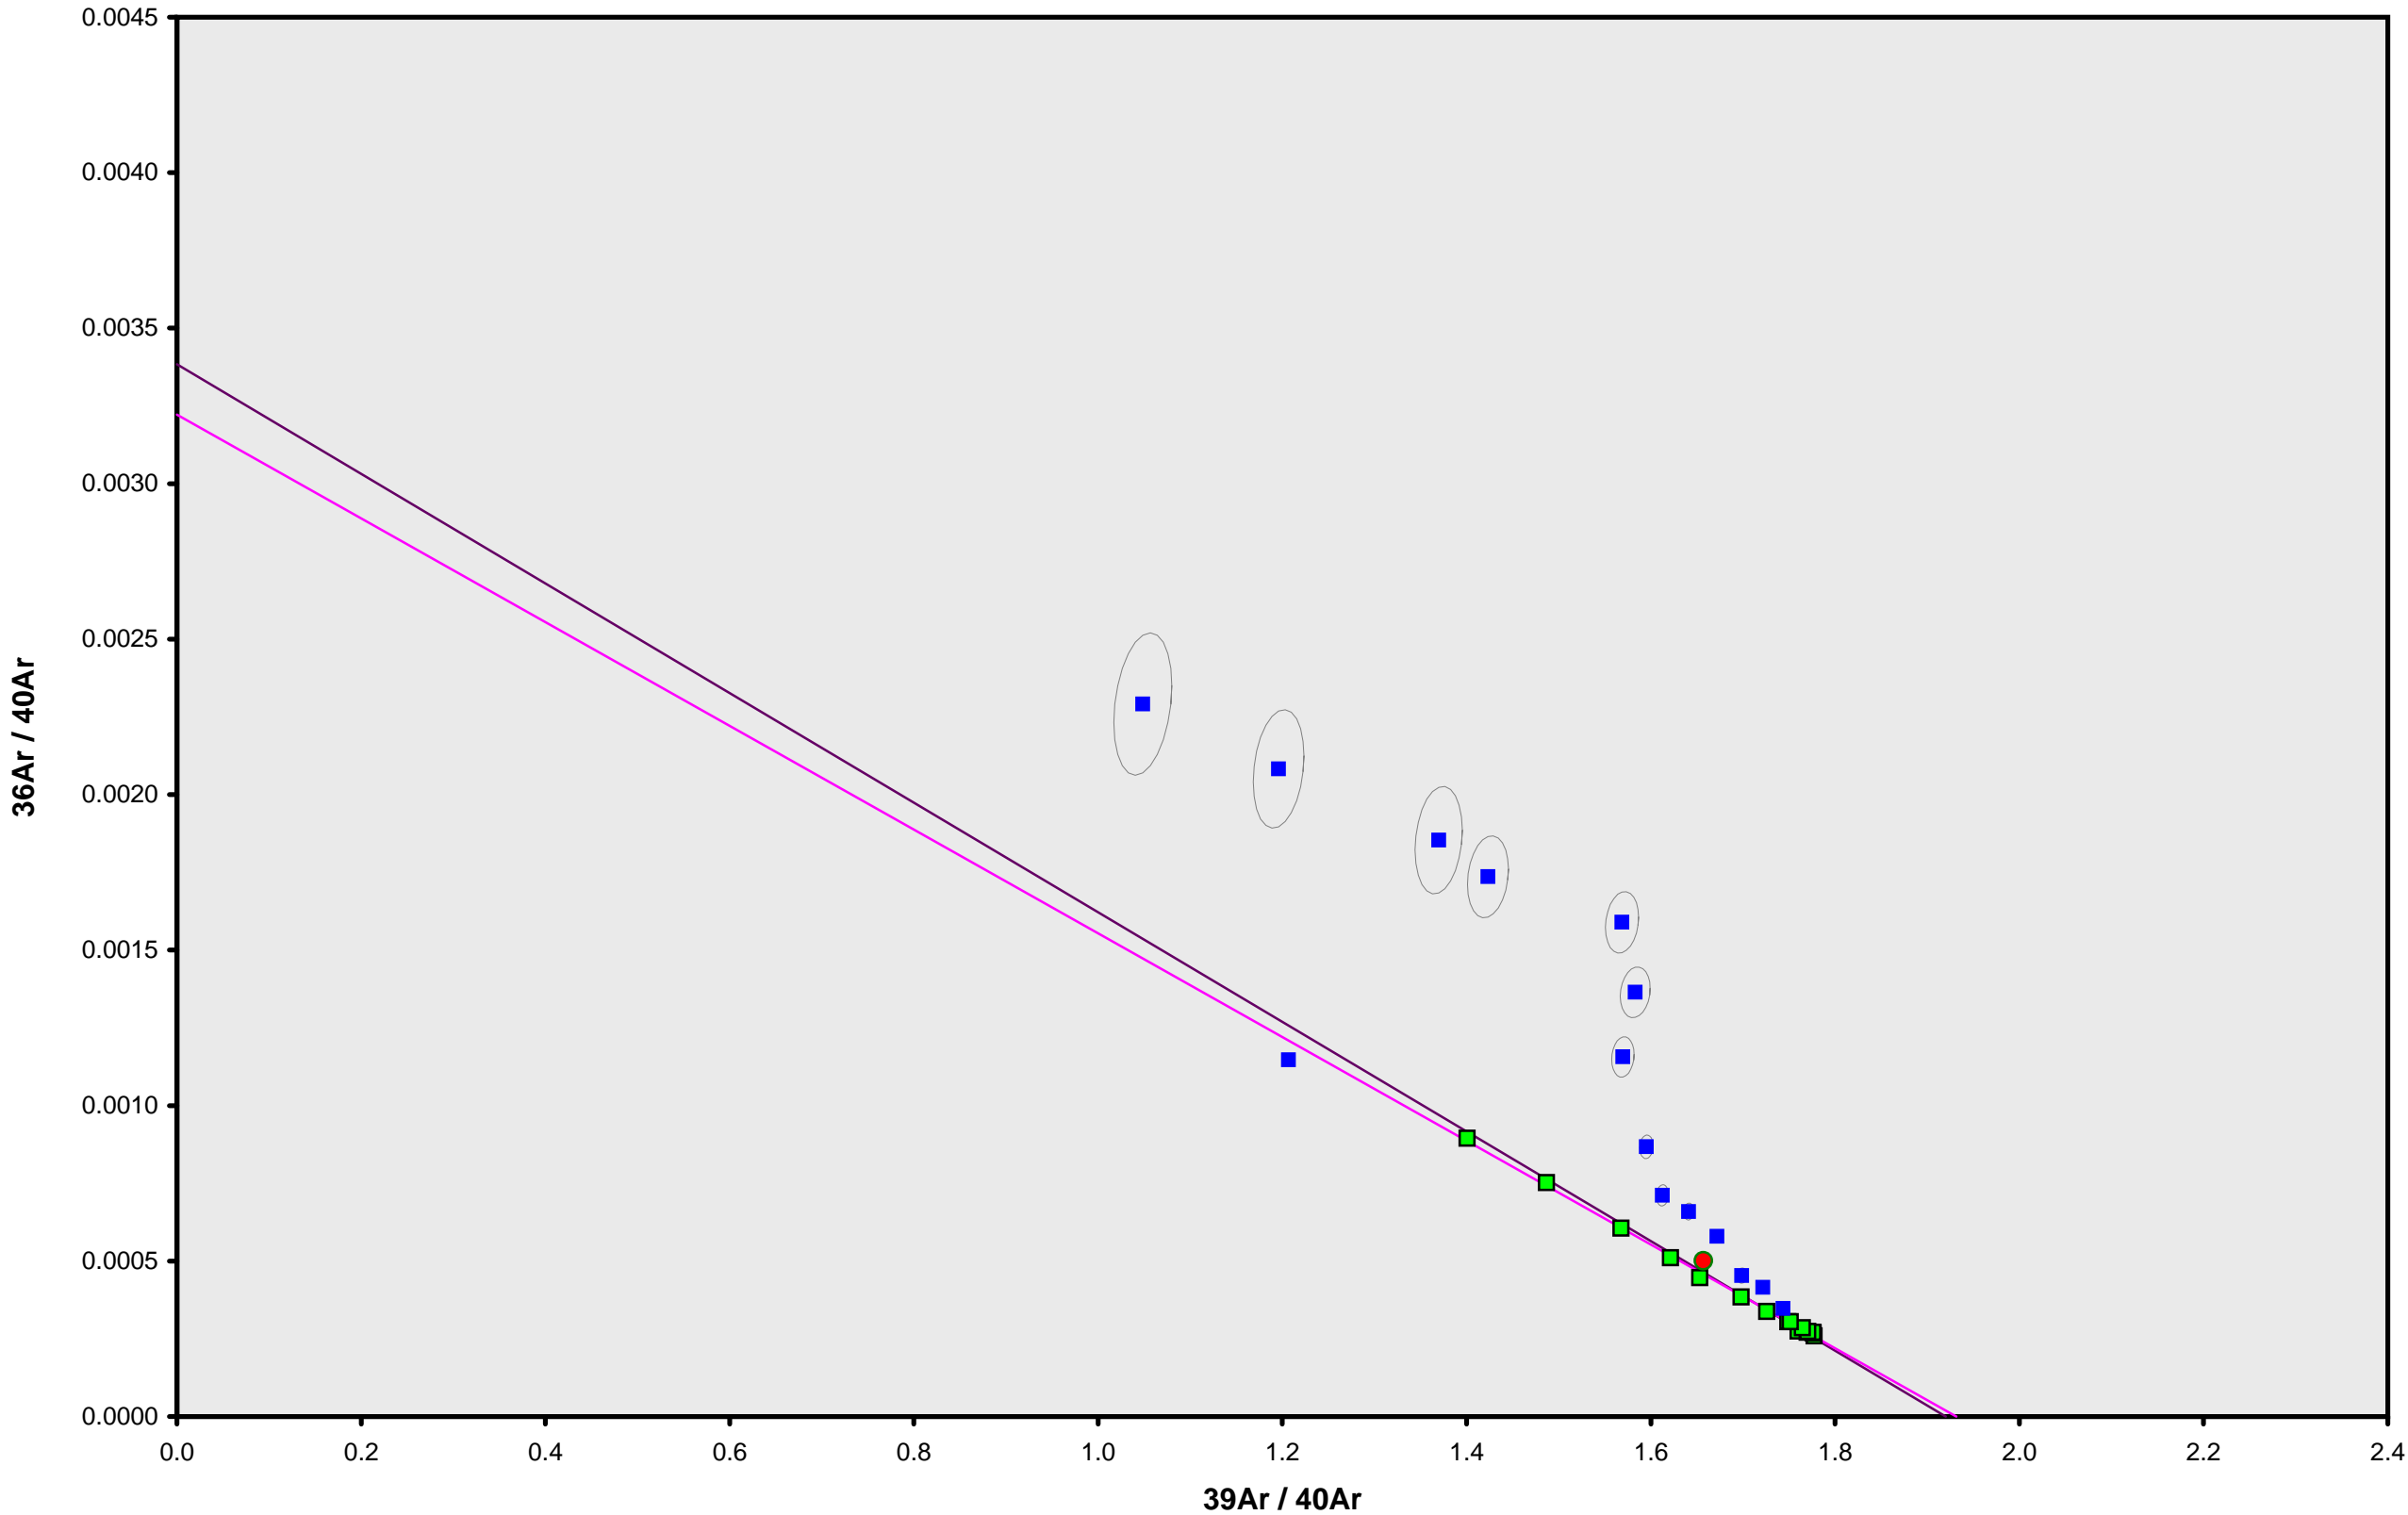

Ar-Ages in Ma

WEIGHTED PLATEAU

$1.68 \pm 0.01$

TOTAL FUSION

$1.66 \pm 0.00$

NORMAL ISOCHRON

$1.67 \pm 0.01$

INVERSE ISOCHRON

$1.67 \pm 0.01$

MSWD (PROBABILITY)

1.25 (23%)

SPREADING FACTOR

19.5%

40AR/36AR INTERCEPT

$310.4 \pm 7.0$

Sample Info

Groundmass

Kerguelen Plateau

Dan Miggins

IRR = 14-OSU-07 (7B22-14)

J =  $0.00178150 \pm 0.00000207$



| Incremental Heating |        | 36Ar(a)<br>[fA] | 37Ar(ca)<br>[fA] | 38Ar(cl)<br>[fA] | 39Ar(k)<br>[fA] | 40Ar(r)<br>[fA] | Age ± 2σ<br>(Ma) | 40Ar(r)<br>(%) | 39Ar(k)<br>(%) | K/Ca ± 2σ       |
|---------------------|--------|-----------------|------------------|------------------|-----------------|-----------------|------------------|----------------|----------------|-----------------|
| 15D10046            | 2.0 %  | 0.560086        | 24.3629          | 0.187286         | 2.43182         | 21.5208         | 28.17 ± 2.35     | 11.51          | 1.12           | 0.0429 ± 0.0016 |
| 15D10048            | 2.2 %  | 0.458137        | 26.8637          | 0.153024         | 2.63174         | 20.1634         | 24.41 ± 1.89     | 12.96          | 1.21           | 0.0421 ± 0.0015 |
| 15D10049            | 2.4 %  | 0.318710        | 21.5558          | 0.163886         | 2.19182         | 13.2853         | 19.34 ± 1.95     | 12.36          | 1.01           | 0.0437 ± 0.0019 |
| 15D10050            | 2.6 %  | ✓ 0.362660      | 25.7229          | 0.229025         | 2.68373         | 20.4172         | 24.24 ± 1.70     | 16.00          | 1.24           | 0.0449 ± 0.0016 |
| 15D10052            | 2.8 %  | ✓ 0.381980      | 27.9155          | 0.232874         | 3.06404         | 26.2803         | 27.31 ± 1.66     | 18.89          | 1.41           | 0.0472 ± 0.0015 |
| 15D10053            | 3.0 %  | ✓ 0.407156      | 29.0606          | 0.222666         | 3.32095         | 26.4355         | 25.36 ± 1.44     | 18.01          | 1.53           | 0.0491 ± 0.0015 |
| 15D10054            | 3.3 %  | ✓ 0.344740      | 27.6866          | 0.217638         | 3.32661         | 24.9849         | 23.93 ± 1.41     | 19.70          | 1.54           | 0.0517 ± 0.0016 |
| 15D10055            | 3.6 %  | ✓ 0.533779      | 36.7432          | 0.272506         | 4.51237         | 31.7622         | 22.44 ± 1.16     | 16.76          | 2.08           | 0.0528 ± 0.0012 |
| 15D10057            | 3.9 %  | ✓ 0.312488      | 31.6337          | 0.196578         | 4.15348         | 29.6140         | 22.73 ± 1.02     | 24.28          | 1.92           | 0.0565 ± 0.0014 |
| 15D10058            | 4.3 %  | ✓ 0.301344      | 31.7394          | 0.264666         | 4.08248         | 27.4893         | 21.47 ± 1.04     | 23.59          | 1.88           | 0.0553 ± 0.0014 |
| 15D10059            | 4.6 %  | ✓ 0.352874      | 37.5221          | 0.262848         | 4.66621         | 33.6532         | 22.99 ± 0.97     | 24.40          | 2.15           | 0.0535 ± 0.0012 |
| 15D10060            | 4.9 %  | ✓ 0.379282      | 45.5402          | 0.329935         | 5.51900         | 38.5991         | 22.30 ± 0.86     | 25.62          | 2.55           | 0.0521 ± 0.0010 |
| 15D10062            | 5.2 %  | ✓ 0.378595      | 50.0073          | 0.333582         | 5.85975         | 37.6181         | 20.48 ± 0.76     | 25.16          | 2.70           | 0.0504 ± 0.0009 |
| 15D10063            | 5.5 %  | ✓ 0.291636      | 43.5599          | 0.306050         | 5.06829         | 30.8615         | 19.43 ± 0.78     | 26.37          | 2.34           | 0.0500 ± 0.0010 |
| 15D10064            | 5.8 %  | ✓ 0.196821      | 31.2442          | 0.258892         | 3.85552         | 22.7521         | 18.83 ± 0.96     | 28.12          | 1.78           | 0.0531 ± 0.0014 |
| 15D10066            | 6.1 %  | ✓ 0.184266      | 29.8186          | 0.246006         | 3.79756         | 22.8351         | 19.19 ± 0.98     | 29.54          | 1.75           | 0.0548 ± 0.0016 |
| 15D10067            | 6.5 %  | ✓ 0.234940      | 34.8052          | 0.312379         | 4.44273         | 25.2120         | 18.11 ± 0.85     | 26.64          | 2.05           | 0.0549 ± 0.0013 |
| 15D10068            | 7.0 %  | ✓ 0.239740      | 37.1285          | 0.336535         | 4.70651         | 27.5552         | 18.68 ± 0.83     | 28.00          | 2.17           | 0.0545 ± 0.0013 |
| 15D10070            | 7.6 %  | ✓ 0.277836      | 44.5291          | 0.455192         | 5.68950         | 32.8665         | 18.44 ± 0.73     | 28.59          | 2.63           | 0.0549 ± 0.0011 |
| 15D10071            | 8.4 %  | ✓ 0.340407      | 57.3386          | 0.645531         | 7.20900         | 43.5376         | 19.27 ± 0.60     | 30.21          | 3.33           | 0.0541 ± 0.0008 |
| 15D10072            | 9.4 %  | ✓ 0.524177      | 97.1120          | 1.200151         | 11.08856        | 65.9694         | 18.98 ± 0.49     | 29.87          | 5.12           | 0.0491 ± 0.0006 |
| 15D10074            | 10.5 % | 0.578973        | 130.0253         | 1.496105         | 12.68309        | 88.5084         | 22.25 ± 0.44     | 34.09          | 5.85           | 0.0419 ± 0.0004 |
| 15D10075            | 11.7 % | 0.594388        | 153.4948         | 1.289072         | 12.40316        | 115.5333        | 29.64 ± 0.47     | 39.68          | 5.72           | 0.0347 ± 0.0003 |
| 15D10076            | 13.1 % | 0.762426        | 230.9227         | 1.254643         | 13.22921        | 204.1145        | 48.83 ± 0.56     | 47.53          | 6.11           | 0.0246 ± 0.0002 |
| 15D10078            | 14.7 % | 0.900446        | 298.5660         | 1.199263         | 13.25332        | 284.2633        | 67.52 ± 0.66     | 51.65          | 6.12           | 0.0191 ± 0.0002 |
| 15D10079            | 16.5 % | 1.327071        | 489.0408         | 1.558800         | 16.12316        | 532.3763        | 102.93 ± 0.77    | 57.58          | 7.44           | 0.0142 ± 0.0001 |
| 15D10080            | 18.5 % | 1.714336        | 648.5486         | 1.672874         | 18.48964        | 778.8719        | 130.32 ± 0.83    | 60.59          | 8.53           | 0.0123 ± 0.0001 |
| 15D10082            | 19.8 % | 1.356014        | 501.0826         | 0.985046         | 13.45379        | 699.0285        | 159.43 ± 1.13    | 63.56          | 6.21           | 0.0115 ± 0.0001 |
| 15D10083            | 21.7 % | 1.223155        | 453.2180         | 0.742404         | 12.07089        | 657.7597        | 166.85 ± 1.24    | 64.54          | 5.57           | 0.0115 ± 0.0001 |
| 15D10084            | 22.8 % | 0.629988        | 215.1014         | 0.393673         | 6.45179         | 329.4545        | 156.80 ± 2.02    | 63.89          | 2.98           | 0.0129 ± 0.0002 |
| 15D10086            | 24.3 % | 0.415435        | 132.3138         | 0.210320         | 4.23322         | 213.3304        | 154.83 ± 2.86    | 63.47          | 1.95           | 0.0138 ± 0.0003 |
| Σ                   |        | 16.883887       | 4044.2041        | 17.629448        | 216.69293       | 4526.6532       |                  |                |                |                 |

| Information on Analysis                                                                                                                                                                                                                                                    | Results                   | 40(r)/39(k) ± 2σ           | Age ± 2σ<br>(Ma)     | MSWD                          | 39Ar(k)<br>(%,n)                                          | K/Ca ± 2σ       |
|----------------------------------------------------------------------------------------------------------------------------------------------------------------------------------------------------------------------------------------------------------------------------|---------------------------|----------------------------|----------------------|-------------------------------|-----------------------------------------------------------|-----------------|
| Sample = 274-3<br>Material = Groundmass<br>Location = Kerguelen Plateau<br>Analyst = Dan Miggins<br>Project = KERGUELEN   FALLOON (14-I<br>Mass Discrimination Law = LIN<br>Irradiation = 14-OSU-07 (7B23-14)<br>J = 0.00177389 ± 0.00000206<br>FCT-NM = 28.201 ± 0.023 Ma | Age Plateau<br>Error Mean | 6.33159 ± 0.30828 ± 4.87%  | 20.20 ± 0.98 ± 4.85% | 22.80<br>0%<br>1.69<br>4.7750 | 40.17<br>18<br>2σ Confidence Limit<br>Error Magnification | 0.0518 ± 0.0013 |
|                                                                                                                                                                                                                                                                            | Total Fusion Age          | 20.88971 ± 0.06220 ± 0.30% | 65.80 ± 0.24 ± 0.37% |                               | 31                                                        | 0.0230 ± 0.0001 |



| Normal Isochron |        | 39(k)/36(a) ± 2σ |              | 40(a+r)/36(a) ± 2σ | r.i.   |
|-----------------|--------|------------------|--------------|--------------------|--------|
| 15D10046        | 2.0 %  |                  | 4.34 ± 0.14  | 333.92 ± 3.35      | 0.2782 |
| 15D10048        | 2.2 %  |                  | 5.74 ± 0.18  | 339.51 ± 3.58      | 0.2988 |
| 15D10049        | 2.4 %  |                  | 6.88 ± 0.26  | 337.18 ± 4.39      | 0.2858 |
| 15D10050        | 2.6 %  | ✓                | 7.40 ± 0.23  | 351.80 ± 4.21      | 0.3365 |
| 15D10052        | 2.8 %  | ✓                | 8.02 ± 0.23  | 364.30 ± 4.59      | 0.3942 |
| 15D10053        | 3.0 %  | ✓                | 8.16 ± 0.21  | 360.43 ± 4.05      | 0.3935 |
| 15D10054        | 3.3 %  | ✓                | 9.65 ± 0.25  | 367.97 ± 4.82      | 0.4513 |
| 15D10055        | 3.6 %  | ✓                | 8.45 ± 0.17  | 355.00 ± 3.42      | 0.4443 |
| 15D10057        | 3.9 %  | ✓                | 13.29 ± 0.29 | 390.27 ± 4.97      | 0.5083 |
| 15D10058        | 4.3 %  | ✓                | 13.55 ± 0.31 | 386.72 ± 5.14      | 0.5096 |
| 15D10059        | 4.6 %  | ✓                | 13.22 ± 0.27 | 390.87 ± 4.78      | 0.5439 |
| 15D10060        | 4.9 %  | ✓                | 14.55 ± 0.26 | 397.27 ± 4.81      | 0.6258 |
| 15D10062        | 5.2 %  | ✓                | 15.48 ± 0.26 | 394.86 ± 4.46      | 0.6012 |
| 15D10063        | 5.5 %  | ✓                | 17.38 ± 0.33 | 401.32 ± 5.16      | 0.5867 |
| 15D10064        | 5.8 %  | ✓                | 19.59 ± 0.51 | 411.10 ± 7.09      | 0.5694 |
| 15D10066        | 6.1 %  | ✓                | 20.61 ± 0.56 | 419.42 ± 7.67      | 0.5789 |
| 15D10067        | 6.5 %  | ✓                | 18.91 ± 0.42 | 402.81 ± 6.12      | 0.5947 |
| 15D10068        | 7.0 %  | ✓                | 19.63 ± 0.45 | 410.44 ± 6.21      | 0.5806 |
| 15D10070        | 7.6 %  | ✓                | 20.48 ± 0.40 | 413.79 ± 5.82      | 0.6427 |
| 15D10071        | 8.4 %  | ✓                | 21.18 ± 0.33 | 423.40 ± 5.17      | 0.7029 |
| 15D10072        | 9.4 %  | ✓                | 21.15 ± 0.26 | 421.35 ± 4.34      | 0.7762 |
| 15D10074        | 10.5 % |                  | 21.91 ± 0.25 | 448.37 ± 4.29      | 0.8026 |
| 15D10075        | 11.7 % |                  | 20.87 ± 0.23 | 489.87 ± 4.58      | 0.8075 |
| 15D10076        | 13.1 % |                  | 17.35 ± 0.18 | 563.22 ± 4.83      | 0.7937 |
| 15D10078        | 14.7 % |                  | 14.72 ± 0.15 | 611.19 ± 5.15      | 0.8150 |
| 15D10079        | 16.5 % |                  | 12.15 ± 0.11 | 696.67 ± 5.35      | 0.8263 |
| 15D10080        | 18.5 % |                  | 10.79 ± 0.09 | 749.83 ± 5.49      | 0.8472 |
| 15D10082        | 19.8 % |                  | 9.92 ± 0.09  | 811.00 ± 6.00      | 0.7742 |
| 15D10083        | 21.7 % |                  | 9.87 ± 0.10  | 833.26 ± 6.27      | 0.7504 |
| 15D10084        | 22.8 % |                  | 10.24 ± 0.16 | 818.45 ± 7.96      | 0.6188 |
| 15D10086        | 24.3 % |                  | 10.19 ± 0.21 | 809.01 ± 8.54      | 0.4937 |

| Results         | 40(a)/36(a) ± 2σ      |        | 40(r)/39(k) ± 2σ     | Age ± 2σ (Ma)              | MSWD |
|-----------------|-----------------------|--------|----------------------|----------------------------|------|
| Normal Isochron | 321.68 ± 6.57         |        | 4.70185 ± 0.43462    | 15.02 ± 1.38               | 4.69 |
| Error Chron     | ± 2.04%               |        | ± 9.24%              | ± 9.21%                    | 0%   |
|                 |                       |        |                      | Full External Error ± 1.42 |      |
|                 |                       |        |                      | Analytical Error ± 1.38    |      |
| Statistics      | 2σ Confidence Limit   | 1.71   | Convergence          | 0.000016169059             |      |
|                 | Error Magnification   | 2.1649 | Number of Iterations | 6                          |      |
|                 | Number of Data Points | 18     | Calculated Line      | Weighted York-2            |      |



| Inverse Isochron |        | 39(k)/40(a+r) ± 2σ    |  | 36(a)/40(a+r) ± 2σ      | r.i.   |
|------------------|--------|-----------------------|--|-------------------------|--------|
| 15D10046         | 2.0 %  | 0.0130026 ± 0.0004016 |  | 0.00299469 ± 0.00003003 | 0.0352 |
| 15D10048         | 2.2 %  | 0.0169197 ± 0.0005021 |  | 0.00294541 ± 0.00003103 | 0.0423 |
| 15D10049         | 2.4 %  | 0.0203959 ± 0.0007490 |  | 0.00296574 ± 0.00003860 | 0.0566 |
| 15D10050         | 2.6 %  | 0.0210351 ± 0.0006167 |  | 0.00284254 ± 0.00003405 | 0.0517 |
| 15D10052         | 2.8 %  | 0.0220188 ± 0.0005872 |  | 0.00274499 ± 0.00003461 | 0.0443 |
| 15D10053         | 3.0 %  | 0.0226300 ± 0.0005318 |  | 0.00277449 ± 0.00003114 | 0.0501 |
| 15D10054         | 3.3 %  | 0.0262236 ± 0.0006089 |  | 0.00271758 ± 0.00003557 | 0.0589 |
| 15D10055         | 3.6 %  | 0.0238127 ± 0.0004232 |  | 0.00281687 ± 0.00002714 | 0.0466 |
| 15D10057         | 3.9 %  | 0.0340577 ± 0.0006491 |  | 0.00256234 ± 0.00003260 | 0.0791 |
| 15D10058         | 4.3 %  | 0.0350318 ± 0.0006942 |  | 0.00258583 ± 0.00003435 | 0.0799 |
| 15D10059         | 4.6 %  | 0.0338309 ± 0.0005759 |  | 0.00255840 ± 0.00003130 | 0.0720 |
| 15D10060         | 4.9 %  | 0.0366281 ± 0.0005063 |  | 0.00251719 ± 0.00003047 | 0.0755 |
| 15D10062         | 5.2 %  | 0.0391975 ± 0.0005319 |  | 0.00253253 ± 0.00002863 | 0.0835 |
| 15D10063         | 5.5 %  | 0.0433039 ± 0.0006744 |  | 0.00249177 ± 0.00003202 | 0.1044 |
| 15D10064         | 5.8 %  | 0.0476503 ± 0.0010186 |  | 0.00243251 ± 0.00004194 | 0.1190 |
| 15D10066         | 6.1 %  | 0.0491366 ± 0.0010921 |  | 0.00238422 ± 0.00004361 | 0.1180 |
| 15D10067         | 6.5 %  | 0.0469451 ± 0.0008365 |  | 0.00248254 ± 0.00003770 | 0.1178 |
| 15D10068         | 7.0 %  | 0.0478312 ± 0.0008897 |  | 0.00243642 ± 0.00003688 | 0.1046 |
| 15D10070         | 7.6 %  | 0.0494881 ± 0.0007428 |  | 0.00241666 ± 0.00003398 | 0.1022 |
| 15D10071         | 8.4 %  | 0.0500181 ± 0.0005636 |  | 0.00236184 ± 0.00002883 | 0.0999 |
| 15D10072         | 9.4 %  | 0.0502054 ± 0.0003975 |  | 0.00237331 ± 0.00002443 | 0.0723 |
| 15D10074         | 10.5 % | 0.0488572 ± 0.0003319 |  | 0.00223029 ± 0.00002134 | 0.0661 |
| 15D10075         | 11.7 % | 0.0425969 ± 0.0002800 |  | 0.00204134 ± 0.00001908 | 0.0557 |
| 15D10076         | 13.1 % | 0.0308078 ± 0.0001982 |  | 0.00177551 ± 0.00001523 | 0.0287 |
| 15D10078         | 14.7 % | 0.0240818 ± 0.0001423 |  | 0.00163615 ± 0.00001378 | 0.0198 |
| 15D10079         | 16.5 % | 0.0174394 ± 0.0000907 |  | 0.00143541 ± 0.00001102 | 0.0090 |
| 15D10080         | 18.5 % | 0.0143837 ± 0.0000658 |  | 0.00133364 ± 0.00000976 | 0.0058 |
| 15D10082         | 19.8 % | 0.0122337 ± 0.0000736 |  | 0.00123304 ± 0.00000912 | 0.0058 |
| 15D10083         | 21.7 % | 0.0118435 ± 0.0000781 |  | 0.00120011 ± 0.00000903 | 0.0061 |
| 15D10084         | 22.8 % | 0.0125128 ± 0.0001527 |  | 0.00122182 ± 0.00001188 | 0.0094 |
| 15D10086         | 24.3 % | 0.0125954 ± 0.0002289 |  | 0.00123608 ± 0.00001305 | 0.0133 |

| Results                         | 40(a)/36(a) ± 2σ      |        | 40(r)/39(k) ± 2σ                                      | Age ± 2σ (Ma)        | MSWD       |
|---------------------------------|-----------------------|--------|-------------------------------------------------------|----------------------|------------|
| Inverse Isochron<br>Error Chron | 321.97 ± 6.60 ± 2.05% |        | 4.69262 ± 0.42771 ± 9.11%                             | 14.99 ± 1.36 ± 9.08% | 4.69<br>0% |
|                                 |                       |        | Full External Error ± 1.40<br>Analytical Error ± 1.36 |                      |            |
| Statistics                      | 2σ Confidence Limit   | 1.71   | Convergence                                           | 0.0000761462         |            |
|                                 | Error Magnification   | 2.1649 | Number of Iterations                                  | 3                    |            |
|                                 | Number of Data Points | 18     | Calculated Line                                       | Weighted York-2      |            |
|                                 | Spreading Factor      | 13.7%  |                                                       |                      |            |



| OSU Argon Geochronology Lab |        |            |       |           |       |           |        |           |       |           |       |                    |               |             |             |                 |
|-----------------------------|--------|------------|-------|-----------|-------|-----------|--------|-----------|-------|-----------|-------|--------------------|---------------|-------------|-------------|-----------------|
| Relative Abundances         |        | 36Ar [fA]  | %1σ   | 37Ar [fA] | %1σ   | 38Ar [fA] | %1σ    | 39Ar [fA] | %1σ   | 40Ar [fA] | %1σ   | 40(r)/39(k) ± 2σ   | Age ± 2σ (Ma) | 40Ar(r) (%) | 39Ar(k) (%) | K/Ca ± 2σ       |
| 15D10046                    | 2.0 %  | 0.566546   | 0.468 | 24.3629   | 1.096 | 0.319979  | 14.126 | 2.44822   | 1.525 | 187.0287  | 0.165 | 8.84965 ± 0.74405  | 28.17 ± 2.35  | 11.51       | 1.12        | 0.0429 ± 0.0016 |
| 15D10048                    | 2.2 %  | 0.465252   | 0.487 | 26.8637   | 1.004 | 0.268972  | 17.265 | 2.64982   | 1.462 | 155.5457  | 0.182 | 7.66162 ± 0.59650  | 24.41 ± 1.89  | 12.96       | 1.21        | 0.0421 ± 0.0015 |
| 15D10049                    | 2.4 %  | 0.324424   | 0.586 | 21.5558   | 1.226 | 0.248696  | 17.468 | 2.20633   | 1.806 | 107.4662  | 0.260 | 6.06128 ± 0.61350  | 19.34 ± 1.95  | 12.36       | 1.01        | 0.0437 ± 0.0019 |
| 15D10050                    | 2.6 %  | ✓ 0.369485 | 0.549 | 25.7229   | 1.066 | 0.327705  | 13.853 | 2.70104   | 1.441 | 127.5861  | 0.213 | 7.60776 ± 0.53812  | 24.24 ± 1.70  | 16.00       | 1.24        | 0.0449 ± 0.0016 |
| 15D10052                    | 2.8 %  | ✓ 0.389384 | 0.588 | 27.9155   | 0.963 | 0.339523  | 13.740 | 3.08283   | 1.311 | 139.1586  | 0.193 | 8.57702 ± 0.52675  | 27.31 ± 1.66  | 18.89       | 1.41        | 0.0472 ± 0.0015 |
| 15D10053                    | 3.0 %  | ✓ 0.414861 | 0.521 | 29.0606   | 0.951 | 0.336960  | 13.520 | 3.34051   | 1.154 | 146.7535  | 0.182 | 7.96021 ± 0.45600  | 25.36 ± 1.44  | 18.01       | 1.53        | 0.0491 ± 0.0015 |
| 15D10054                    | 3.3 %  | ✓ 0.352081 | 0.606 | 27.6866   | 1.015 | 0.320312  | 13.609 | 3.34524   | 1.135 | 126.8590  | 0.211 | 7.51062 ± 0.44643  | 23.93 ± 1.41  | 19.70       | 1.54        | 0.0517 ± 0.0016 |
| 15D10055                    | 3.6 %  | ✓ 0.543519 | 0.452 | 36.7432   | 0.776 | 0.424131  | 10.798 | 4.53710   | 0.873 | 189.4984  | 0.141 | 7.03891 ± 0.36464  | 22.44 ± 1.16  | 16.76       | 2.08        | 0.0528 ± 0.0012 |
| 15D10057                    | 3.9 %  | ✓ 0.320868 | 0.581 | 31.6337   | 0.819 | 0.302688  | 15.015 | 4.17477   | 0.923 | 121.9582  | 0.219 | 7.12992 ± 0.32337  | 22.73 ± 1.02  | 24.28       | 1.92        | 0.0565 ± 0.0014 |
| 15D10058                    | 4.3 %  | ✓ 0.309762 | 0.606 | 31.7394   | 0.877 | 0.367887  | 11.740 | 4.10384   | 0.959 | 116.5407  | 0.229 | 6.73348 ± 0.32850  | 21.47 ± 1.04  | 23.59       | 1.88        | 0.0553 ± 0.0014 |
| 15D10059                    | 4.6 %  | ✓ 0.362818 | 0.564 | 37.5221   | 0.721 | 0.382423  | 11.482 | 4.69146   | 0.824 | 137.9322  | 0.194 | 7.21211 ± 0.30763  | 22.99 ± 0.97  | 24.40       | 2.15        | 0.0535 ± 0.0012 |
| 15D10060                    | 4.9 %  | ✓ 0.391353 | 0.560 | 45.5402   | 0.659 | 0.464262  | 9.788  | 5.54965   | 0.664 | 150.6824  | 0.178 | 6.99385 ± 0.27083  | 22.30 ± 0.86  | 25.62       | 2.55        | 0.0521 ± 0.0010 |
| 15D10062                    | 5.2 %  | ✓ 0.391846 | 0.518 | 50.0073   | 0.610 | 0.471720  | 9.691  | 5.89341   | 0.651 | 149.4990  | 0.179 | 6.41974 ± 0.23943  | 20.48 ± 0.76  | 25.16       | 2.70        | 0.0504 ± 0.0009 |
| 15D10063                    | 5.5 %  | ✓ 0.303181 | 0.577 | 43.5599   | 0.688 | 0.418839  | 10.600 | 5.09761   | 0.740 | 117.0451  | 0.229 | 6.08913 ± 0.24709  | 19.43 ± 0.78  | 26.37       | 2.34        | 0.0500 ± 0.0010 |
| 15D10064                    | 5.8 %  | ✓ 0.205108 | 0.763 | 31.2442   | 0.882 | 0.339988  | 13.445 | 3.87655   | 1.011 | 80.9166   | 0.331 | 5.90117 ± 0.30229  | 18.83 ± 0.96  | 28.12       | 1.78        | 0.0531 ± 0.0014 |
| 15D10066                    | 6.1 %  | ✓ 0.192174 | 0.811 | 29.8186   | 0.962 | 0.324076  | 13.379 | 3.81762   | 1.050 | 77.2895   | 0.346 | 6.01310 ± 0.30809  | 19.19 ± 0.98  | 29.54       | 1.75        | 0.0548 ± 0.0016 |
| 15D10067                    | 6.5 %  | ✓ 0.244174 | 0.678 | 34.8052   | 0.840 | 0.407331  | 10.775 | 4.46616   | 0.841 | 94.6412   | 0.282 | 5.67489 ± 0.26872  | 18.11 ± 0.85  | 26.64       | 2.05        | 0.0549 ± 0.0013 |
| 15D10068                    | 7.0 %  | ✓ 0.249591 | 0.678 | 37.1285   | 0.757 | 0.435419  | 10.409 | 4.73150   | 0.885 | 98.4031   | 0.271 | 5.85470 ± 0.26263  | 18.68 ± 0.83  | 28.00       | 2.17        | 0.0545 ± 0.0013 |
| 15D10070                    | 7.6 %  | ✓ 0.289658 | 0.636 | 44.5291   | 0.648 | 0.572485  | 7.688  | 5.71946   | 0.710 | 114.9726  | 0.232 | 5.77669 ± 0.22866  | 18.44 ± 0.73  | 28.59       | 2.63        | 0.0549 ± 0.0011 |
| 15D10071                    | 8.4 %  | ✓ 0.355640 | 0.556 | 57.3386   | 0.554 | 0.791988  | 5.677  | 7.24759   | 0.529 | 144.1352  | 0.185 | 6.03933 ± 0.18960  | 19.27 ± 0.60  | 30.21       | 3.33        | 0.0541 ± 0.0008 |
| 15D10072                    | 9.4 %  | ✓ 0.549991 | 0.476 | 97.1120   | 0.420 | 1.425657  | 3.053  | 11.15392  | 0.375 | 220.8750  | 0.121 | 5.94933 ± 0.15453  | 18.98 ± 0.49  | 29.87       | 5.12        | 0.0491 ± 0.0006 |
| 15D10074                    | 10.5 % | 0.613519   | 0.440 | 130.0253  | 0.378 | 1.750456  | 2.532  | 12.77059  | 0.321 | 259.6077  | 0.104 | 6.97846 ± 0.14044  | 22.25 ± 0.44  | 34.09       | 5.85        | 0.0419 ± 0.0004 |
| 15D10075                    | 11.7 % | 0.635100   | 0.428 | 153.4948  | 0.366 | 1.543445  | 2.877  | 12.50646  | 0.313 | 291.1874  | 0.092 | 9.31483 ± 0.14891  | 29.64 ± 0.47  | 39.68       | 5.72        | 0.0347 ± 0.0003 |
| 15D10076                    | 13.1 % | 0.823574   | 0.392 | 230.9227  | 0.344 | 1.550899  | 2.760  | 13.38462  | 0.312 | 429.4249  | 0.063 | 15.42908 ± 0.17896 | 48.83 ± 0.56  | 47.53       | 6.11        | 0.0246 ± 0.0002 |
| 15D10078                    | 14.7 % | 0.979444   | 0.384 | 298.5660  | 0.335 | 1.522529  | 2.875  | 13.45425  | 0.287 | 550.3585  | 0.050 | 21.44847 ± 0.21334 | 67.52 ± 0.66  | 51.65       | 6.12        | 0.0191 ± 0.0002 |
| 15D10079                    | 16.5 % | 1.456407   | 0.347 | 489.0408  | 0.328 | 1.997108  | 2.218  | 16.45229  | 0.253 | 924.5419  | 0.030 | 33.01934 ± 0.25476 | 102.93 ± 0.77 | 57.58       | 7.44        | 0.0142 ± 0.0001 |
| 15D10080                    | 18.5 % | 1.885799   | 0.331 | 648.5486  | 0.326 | 2.212710  | 1.965  | 18.92611  | 0.222 | 1285.4769 | 0.022 | 42.12478 ± 0.27893 | 130.32 ± 0.83 | 60.59       | 8.53        | 0.0123 ± 0.0001 |
| 15D10082                    | 19.8 % | 1.488444   | 0.335 | 501.0826  | 0.328 | 1.398554  | 3.258  | 13.79102  | 0.292 | 1099.7441 | 0.025 | 51.95775 ± 0.38350 | 159.43 ± 1.13 | 63.56       | 6.21        | 0.0115 ± 0.0001 |
| 15D10083                    | 21.7 % | 1.342914   | 0.341 | 453.2180  | 0.329 | 1.114678  | 4.034  | 12.37590  | 0.320 | 1019.2143 | 0.027 | 54.49141 ± 0.42540 | 166.85 ± 1.24 | 64.54       | 5.57        | 0.0115 ± 0.0001 |
| 15D10084                    | 22.8 % | 0.686832   | 0.442 | 215.1014  | 0.348 | 0.587829  | 7.437  | 6.59655   | 0.594 | 515.6224  | 0.053 | 51.06405 ± 0.68575 | 156.80 ± 2.02 | 63.89       | 2.98        | 0.0129 ± 0.0002 |
| 15D10086                    | 24.3 % | 0.450397   | 0.481 | 132.3138  | 0.380 | 0.337978  | 13.257 | 4.32226   | 0.887 | 336.0957  | 0.080 | 50.39438 ± 0.96971 | 154.83 ± 2.86 | 63.47       | 1.95        | 0.0138 ± 0.0003 |
| Σ                           |        | 17.954145  | 0.088 | 4044.2041 | 0.101 | 23.307227 | 1.066  | 219.41468 | 0.100 | 9516.0607 | 0.016 |                    |               |             |             |                 |

| Information on Analysis and Constants Used in Calculations | Results          | 40(a)/36(a) ± 2σ | 40(r)/39(k) ± 2σ   | Age ± 2σ (Ma)              | MSWD         | 39Ar(k) (% <sub>n</sub> ) | K/Ca ± 2σ       |
|------------------------------------------------------------|------------------|------------------|--------------------|----------------------------|--------------|---------------------------|-----------------|
| Sample = 274-3                                             | Age Plateau      |                  | 6.33159 ± 0.30828  | 20.20 ± 0.98               | 22.80        | 40.17                     | 0.0518 ± 0.0013 |
| Material = Groundmass                                      | Error Mean       |                  | ± 4.87%            | ± 4.85%                    | 0%           | 18                        |                 |
| Location = Kerguelen Plateau                               |                  |                  |                    | Full External Error ± 1.08 | 1.69         | 2σ Confidence Limit       |                 |
| Analyst = Dan Miggins                                      |                  |                  |                    | Analytical Error ± 0.98    | 4.7750       | Error Magnification       |                 |
| Project = KERGUELEN   FALLOON (14-PIL-01)                  |                  |                  |                    |                            |              |                           |                 |
| Mass Discrimination Law = LIN                              |                  |                  |                    |                            |              |                           |                 |
| Irradiation = 14-OSU-07 (7B23-14)                          | Total Fusion Age |                  | 20.88971 ± 0.06220 | 65.80 ± 0.24               |              | 31                        | 0.0230 ± 0.0001 |
| J = 0.00177389 ± 0.00000206                                |                  |                  | ± 0.30%            | ± 0.37%                    |              |                           |                 |
| FCT-NM = 28.201 ± 0.023 Ma                                 |                  |                  |                    | Full External Error ± 1.49 |              |                           |                 |
| IGSN = Undefined                                           |                  |                  |                    | Analytical Error ± 0.19    |              |                           |                 |
| Preferred Age = Undefined                                  |                  |                  |                    |                            |              |                           |                 |
| Classification = Undefined                                 | Normal Isochron  | 321.68 ± 6.57    | 4.70185 ± 0.43462  | 15.02 ± 1.38               | 4.69         | 40.17                     |                 |
| Experiment Type = Incremental Heating                      | Error Chron      | ± 2.04%          | ± 9.24%            | ± 9.21%                    | 0%           | 18                        |                 |
| Extraction Method = Undefined                              |                  |                  |                    | Full External Error ± 1.42 | 1.71         | 2σ Confidence Limit       |                 |
| Heating = 77 sec                                           |                  |                  |                    | Analytical Error ± 1.38    | 2.1649       | Error Magnification       |                 |
| Isolation = 6.00 min                                       |                  |                  |                    |                            | 6            | Number of Iterations      |                 |
| Instrument = ARGUS-VI-D                                    |                  |                  |                    |                            | 0.0000161691 | Convergence               |                 |
| Lithology = Undefined                                      |                  |                  |                    |                            |              |                           |                 |
| Lat-Lon = Undefined - Undefined                            | Inverse Isochron | 321.97 ± 6.60    | 4.69262 ± 0.42771  | 14.99 ± 1.36               | 4.69         | 40.17                     |                 |
| Collector Calibrations = 40Ar 36Ar                         | Error Chron      | ± 2.05%          | ± 9.11%            | ± 9.08%                    | 0%           | 18                        |                 |
|                                                            |                  |                  |                    | Full External Error ± 1.40 | 1.71         | 2σ Confidence Limit       |                 |



| OSU Argon Geochronology Lab |                 |  |     |                 |  |     |                  |  |     |                  |  |     |                  |  |     |                 |  |     |                 |  |     |                 |  |     |                  |  |     |                  |  |     |                 |  |     |                  |  |     |                 |  |     |                 |  |     |                 |  |     |                 |  |     |  |  |  |  |  |  |  |  |  |  |  |  |  |  |  |  |  |  |  |  |  |  |  |  |  |  |  |  |  |  |  |  |  |  |  |  |  |  |  |  |  |  |  |  |  |  |  |  |  |  |  |  |  |  |  |  |  |  |  |  |  |  |  |  |  |  |  |  |  |  |  |  |  |  |  |  |  |  |  |  |  |  |  |  |  |  |  |  |  |  |  |  |  |  |  |  |  |  |  |  |  |  |  |  |  |  |  |  |  |  |  |  |  |  |  |  |  |  |  |  |  |  |  |  |  |  |  |  |  |  |  |  |  |  |  |  |  |  |  |  |  |  |  |  |  |  |  |  |  |  |  |  |  |  |  |  |  |  |  |  |  |  |  |  |  |  |  |  |  |  |  |  |  |  |  |  |  |  |  |  |  |  |  |  |  |  |  |  |  |  |  |  |  |  |  |  |  |  |  |  |  |  |  |  |  |  |  |  |  |  |  |  |  |  |  |  |  |  |  |  |  |  |  |  |  |  |  |  |  |  |  |  |  |  |  |  |  |  |  |  |  |  |  |  |  |  |  |  |  |  |  |  |  |  |  |  |  |  |  |  |  |  |  |  |  |  |  |  |  |  |  |  |  |  |  |  |  |  |  |  |  |  |  |  |  |  |  |  |  |  |  |  |  |  |  |  |  |  |  |  |  |  |  |  |  |  |  |  |  |  |  |  |  |  |  |  |  |  |  |  |  |  |  |  |  |  |  |  |  |  |  |  |  |  |  |  |  |  |  |  |  |  |  |  |  |  |  |  |  |  |  |  |  |  |  |  |  |  |  |  |  |  |  |  |  |  |  |  |  |  |  |  |  |  |  |  |  |  |  |  |  |  |  |  |  |  |  |  |  |  |  |  |  |  |  |  |  |  |  |  |  |  |  |  |  |  |  |  |  |  |  |  |  |  |  |  |  |  |  |  |  |  |  |  |  |  |  |  |  |  |  |  |  |  |  |  |  |  |  |  |  |  |  |  |  |  |  |  |  |  |  |  |  |  |  |  |  |  |  |  |  |  |  |  |  |  |  |  |  |  |  |  |  |  |  |  |  |  |  |  |  |  |  |  |  |  |  |  |  |  |  |  |  |  |  |  |  |  |  |  |  |  |  |  |  |  |  |  |  |  |  |  |  |  |  |  |  |  |  |  |  |  |  |  |  |  |  |  |  |  |  |  |  |  |  |  |  |  |  |  |  |  |  |  |  |  |  |  |  |  |  |  |  |  |  |  |  |  |  |  |  |  |  |  |  |  |  |  |  |  |  |  |  |  |  |  |  |  |  |  |  |  |  |  |  |  |  |  |  |  |  |  |  |  |  |  |  |  |  |  |  |  |  |  |  |  |  |  |  |  |  |  |  |  |  |  |  |  |  |  |  |  |  |  |  |  |  |  |  |  |  |  |  |  |  |  |  |  |  |  |  |  |  |  |  |  |  |  |  |  |  |  |  |  |  |  |  |  |  |  |  |  |  |  |  |  |  |  |  |  |  |  |  |  |  |  |  |  |  |  |  |  |  |  |  |  |  |  |  |  |  |  |  |  |  |  |  |  |  |  |  |  |  |  |  |  |  |  |  |  |  |  |  |  |  |  |  |  |  |  |  |  |  |  |  |  |  |  |  |  |  |  |  |  |  |  |  |  |  |  |  |  |  |  |  |  |  |  |  |  |  |  |  |  |  |  |  |  |  |  |  |  |  |  |  |  |  |  |  |  |  |  |  |  |  |  |  |  |  |  |  |  |  |  |  |  |  |  |  |  |  |  |  |  |  |  |  |  |  |  |  |  |  |  |  |  |  |  |  |  |  |  |  |  |  |  |  |  |  |  |  |  |  |  |  |  |  |  |  |  |  |  |  |  |  |  |  |  |  |  |  |  |  |  |  |  |  |  |  |  |  |  |  |  |  |  |  |  |  |  |  |  |  |  |  |  |  |  |  |  |  |  |  |  |  |  |  |  |  |  |  |  |  |  |  |  |  |  |  |  |  |  |  |  |  |  |  |  |  |  |  |  |  |  |  |  |  |  |  |  |  |  |  |  |  |  |  |  |  |  |  |  |  |  |  |  |  |  |  |  |  |  |  |  |  |  |  |  |  |  |  |  |  |  |  |  |  |  |  |  |  |  |  |  |  |  |  |  |  |  |  |  |  |  |  |  |  |  |  |  |  |  |  |  |  |  |  |  |  |  |  |  |  |  |  |  |  |  |  |  |  |  |  |  |  |  |  |  |  |  |  |  |  |  |  |  |  |  |  |  |  |  |  |  |  |  |  |  |  |  |  |  |  |  |  |  |  |  |  |  |  |  |  |  |  |  |  |  |  |  |  |  |  |  |  |  |  |  |  |  |  |  |  |  |  |  |  |  |  |  |  |  |  |  |  |  |  |  |  |  |  |  |  |  |  |  |  |  |  |  |  |  |  |  |  |  |  |  |  |  |  |  |  |  |  |  |  |  |  |  |  |  |  |  |  |  |  |  |  |  |  |  |  |  |  |  |  |  |  |  |  |  |  |  |  |  |  |  |  |  |  |  |  |  |  |  |  |  |  |  |  |  |  |  |  |  |  |  |  |  |  |  |  |  |  |  |  |  |  |  |  |  |  |  |  |  |  |  |  |  |  |  |  |  |  |  |  |  |  |  |  |  |  |  |  |  |  |  |  |  |  |  |  |  |  |  |  |  |  |  |  |  |  |  |  |  |  |  |  |  |  |  |  |  |  |  |  |  |  |  |  |  |  |  |  |  |  |  |  |  |  |  |  |  |  |  |  |  |  |  |  |  |  |  |  |  |  |  |  |  |  |  |  |  |
|-----------------------------|-----------------|--|-----|-----------------|--|-----|------------------|--|-----|------------------|--|-----|------------------|--|-----|-----------------|--|-----|-----------------|--|-----|-----------------|--|-----|------------------|--|-----|------------------|--|-----|-----------------|--|-----|------------------|--|-----|-----------------|--|-----|-----------------|--|-----|-----------------|--|-----|-----------------|--|-----|--|--|--|--|--|--|--|--|--|--|--|--|--|--|--|--|--|--|--|--|--|--|--|--|--|--|--|--|--|--|--|--|--|--|--|--|--|--|--|--|--|--|--|--|--|--|--|--|--|--|--|--|--|--|--|--|--|--|--|--|--|--|--|--|--|--|--|--|--|--|--|--|--|--|--|--|--|--|--|--|--|--|--|--|--|--|--|--|--|--|--|--|--|--|--|--|--|--|--|--|--|--|--|--|--|--|--|--|--|--|--|--|--|--|--|--|--|--|--|--|--|--|--|--|--|--|--|--|--|--|--|--|--|--|--|--|--|--|--|--|--|--|--|--|--|--|--|--|--|--|--|--|--|--|--|--|--|--|--|--|--|--|--|--|--|--|--|--|--|--|--|--|--|--|--|--|--|--|--|--|--|--|--|--|--|--|--|--|--|--|--|--|--|--|--|--|--|--|--|--|--|--|--|--|--|--|--|--|--|--|--|--|--|--|--|--|--|--|--|--|--|--|--|--|--|--|--|--|--|--|--|--|--|--|--|--|--|--|--|--|--|--|--|--|--|--|--|--|--|--|--|--|--|--|--|--|--|--|--|--|--|--|--|--|--|--|--|--|--|--|--|--|--|--|--|--|--|--|--|--|--|--|--|--|--|--|--|--|--|--|--|--|--|--|--|--|--|--|--|--|--|--|--|--|--|--|--|--|--|--|--|--|--|--|--|--|--|--|--|--|--|--|--|--|--|--|--|--|--|--|--|--|--|--|--|--|--|--|--|--|--|--|--|--|--|--|--|--|--|--|--|--|--|--|--|--|--|--|--|--|--|--|--|--|--|--|--|--|--|--|--|--|--|--|--|--|--|--|--|--|--|--|--|--|--|--|--|--|--|--|--|--|--|--|--|--|--|--|--|--|--|--|--|--|--|--|--|--|--|--|--|--|--|--|--|--|--|--|--|--|--|--|--|--|--|--|--|--|--|--|--|--|--|--|--|--|--|--|--|--|--|--|--|--|--|--|--|--|--|--|--|--|--|--|--|--|--|--|--|--|--|--|--|--|--|--|--|--|--|--|--|--|--|--|--|--|--|--|--|--|--|--|--|--|--|--|--|--|--|--|--|--|--|--|--|--|--|--|--|--|--|--|--|--|--|--|--|--|--|--|--|--|--|--|--|--|--|--|--|--|--|--|--|--|--|--|--|--|--|--|--|--|--|--|--|--|--|--|--|--|--|--|--|--|--|--|--|--|--|--|--|--|--|--|--|--|--|--|--|--|--|--|--|--|--|--|--|--|--|--|--|--|--|--|--|--|--|--|--|--|--|--|--|--|--|--|--|--|--|--|--|--|--|--|--|--|--|--|--|--|--|--|--|--|--|--|--|--|--|--|--|--|--|--|--|--|--|--|--|--|--|--|--|--|--|--|--|--|--|--|--|--|--|--|--|--|--|--|--|--|--|--|--|--|--|--|--|--|--|--|--|--|--|--|--|--|--|--|--|--|--|--|--|--|--|--|--|--|--|--|--|--|--|--|--|--|--|--|--|--|--|--|--|--|--|--|--|--|--|--|--|--|--|--|--|--|--|--|--|--|--|--|--|--|--|--|--|--|--|--|--|--|--|--|--|--|--|--|--|--|--|--|--|--|--|--|--|--|--|--|--|--|--|--|--|--|--|--|--|--|--|--|--|--|--|--|--|--|--|--|--|--|--|--|--|--|--|--|--|--|--|--|--|--|--|--|--|--|--|--|--|--|--|--|--|--|--|--|--|--|--|--|--|--|--|--|--|--|--|--|--|--|--|--|--|--|--|--|--|--|--|--|--|--|--|--|--|--|--|--|--|--|--|--|--|--|--|--|--|--|--|--|--|--|--|--|--|--|--|--|--|--|--|--|--|--|--|--|--|--|--|--|--|--|--|--|--|--|--|--|--|--|--|--|--|--|--|--|--|--|--|--|--|--|--|--|--|--|--|--|--|--|--|--|--|--|--|--|--|--|--|--|--|--|--|--|--|--|--|--|--|--|--|--|--|--|--|--|--|--|--|--|--|--|--|--|--|--|--|--|--|--|--|--|--|--|--|--|--|--|--|--|--|--|--|--|--|--|--|--|--|--|--|--|--|--|--|--|--|--|--|--|--|--|--|--|--|--|--|--|--|--|--|--|--|--|--|--|--|--|--|--|--|--|--|--|--|--|--|--|--|--|--|--|--|--|--|--|--|--|--|--|--|--|--|--|--|--|--|--|--|--|--|--|--|--|--|--|--|--|--|--|--|--|--|--|--|--|--|--|--|--|--|--|--|--|--|--|--|--|--|--|--|--|--|--|--|--|--|--|--|--|--|--|--|--|--|--|--|--|--|--|--|--|--|--|--|--|--|--|--|--|--|--|--|--|--|--|--|--|--|--|--|--|--|--|--|--|--|--|--|--|--|--|--|--|--|--|--|--|--|--|--|--|--|--|--|--|--|--|--|--|--|--|--|--|--|--|--|--|--|--|--|--|--|--|--|--|--|--|--|--|--|--|--|--|--|--|--|--|--|--|--|--|--|--|--|--|--|--|--|--|--|--|--|--|--|--|--|--|--|--|--|--|--|--|--|--|--|--|--|--|--|--|--|--|--|--|--|--|--|--|--|--|--|--|--|--|--|--|--|--|--|--|--|--|--|--|--|--|--|--|--|--|--|--|--|--|--|--|--|--|--|--|--|--|--|--|--|--|--|--|--|--|--|--|--|--|--|--|--|--|--|--|--|--|--|--|--|--|--|--|--|--|--|--|--|--|--|--|--|--|--|--|--|--|--|--|--|--|--|--|--|--|--|--|--|--|--|--|--|--|--|--|
| Degassing<br>Patterns       | 36Ar(a)<br>[fA] |  | %1σ | 36Ar(c)<br>[fA] |  | %1σ | 36Ar(ca)<br>[fA] |  | %1σ | 36Ar(cl)<br>[fA] |  | %1σ | 37Ar(ca)<br>[fA] |  | %1σ | 38Ar(a)<br>[fA] |  | %1σ | 38Ar(c)<br>[fA] |  | %1σ | 38Ar(k)<br>[fA] |  | %1σ | 38Ar(ca)<br>[fA] |  | %1σ | 38Ar(cl)<br>[fA] |  | %1σ | 39Ar(k)<br>[fA] |  | %1σ | 39Ar(ca)<br>[fA] |  | %1σ | 40Ar(r)<br>[fA] |  | %1σ | 40Ar(a)<br>[fA] |  | %1σ | 40Ar(c)<br>[fA] |  | %1σ | 40Ar(k)<br>[fA] |  | %1σ |  |  |  |  |  |  |  |  |  |  |  |  |  |  |  |  |  |  |  |  |  |  |  |  |  |  |  |  |  |  |  |  |  |  |  |  |  |  |  |  |  |  |  |  |  |  |  |  |  |  |  |  |  |  |  |  |  |  |  |  |  |  |  |  |  |  |  |  |  |  |  |  |  |  |  |  |  |  |  |  |  |  |  |  |  |  |  |  |  |  |  |  |  |  |  |  |  |  |  |  |  |  |  |  |  |  |  |  |  |  |  |  |  |  |  |  |  |  |  |  |  |  |  |  |  |  |  |  |  |  |  |  |  |  |  |  |  |  |  |  |  |  |  |  |  |  |  |  |  |  |  |  |  |  |  |  |  |  |  |  |  |  |  |  |  |  |  |  |  |  |  |  |  |  |  |  |  |  |  |  |  |  |  |  |  |  |  |  |  |  |  |  |  |  |  |  |  |  |  |  |  |  |  |  |  |  |  |  |  |  |  |  |  |  |  |  |  |  |  |  |  |  |  |  |  |  |  |  |  |  |  |  |  |  |  |  |  |  |  |  |  |  |  |  |  |  |  |  |  |  |  |  |  |  |  |  |  |  |  |  |  |  |  |  |  |  |  |  |  |  |  |  |  |  |  |  |  |  |  |  |  |  |  |  |  |  |  |  |  |  |  |  |  |  |  |  |  |  |  |  |  |  |  |  |  |  |  |  |  |  |  |  |  |  |  |  |  |  |  |  |  |  |  |  |  |  |  |  |  |  |  |  |  |  |  |  |  |  |  |  |  |  |  |  |  |  |  |  |  |  |  |  |  |  |  |  |  |  |  |  |  |  |  |  |  |  |  |  |  |  |  |  |  |  |  |  |  |  |  |  |  |  |  |  |  |  |  |  |  |  |  |  |  |  |  |  |  |  |  |  |  |  |  |  |  |  |  |  |  |  |  |  |  |  |  |  |  |  |  |  |  |  |  |  |  |  |  |  |  |  |  |  |  |  |  |  |  |  |  |  |  |  |  |  |  |  |  |  |  |  |  |  |  |  |  |  |  |  |  |  |  |  |  |  |  |  |  |  |  |  |  |  |  |  |  |  |  |  |  |  |  |  |  |  |  |  |  |  |  |  |  |  |  |  |  |  |  |  |  |  |  |  |  |  |  |  |  |  |  |  |  |  |  |  |  |  |  |  |  |  |  |  |  |  |  |  |  |  |  |  |  |  |  |  |  |  |  |  |  |  |  |  |  |  |  |  |  |  |  |  |  |  |  |  |  |  |  |  |  |  |  |  |  |  |  |  |  |  |  |  |  |  |  |  |  |  |  |  |  |  |  |  |  |  |  |  |  |  |  |  |  |  |  |  |  |  |  |  |  |  |  |  |  |  |  |  |  |  |  |  |  |  |  |  |  |  |  |  |  |  |  |  |  |  |  |  |  |  |  |  |  |  |  |  |  |  |  |  |  |  |  |  |  |  |  |  |  |  |  |  |  |  |  |  |  |  |  |  |  |  |  |  |  |  |  |  |  |  |  |  |  |  |  |  |  |  |  |  |  |  |  |  |  |  |  |  |  |  |  |  |  |  |  |  |  |  |  |  |  |  |  |  |  |  |  |  |  |  |  |  |  |  |  |  |  |  |  |  |  |  |  |  |  |  |  |  |  |  |  |  |  |  |  |  |  |  |  |  |  |  |  |  |  |  |  |  |  |  |  |  |  |  |  |  |  |  |  |  |  |  |  |  |  |  |  |  |  |  |  |  |  |  |  |  |  |  |  |  |  |  |  |  |  |  |  |  |  |  |  |  |  |  |  |  |  |  |  |  |  |  |  |  |  |  |  |  |  |  |  |  |  |  |  |  |  |  |  |  |  |  |  |  |  |  |  |  |  |  |  |  |  |  |  |  |  |  |  |  |  |  |  |  |  |  |  |  |  |  |  |  |  |  |  |  |  |  |  |  |  |  |  |  |  |  |  |  |  |  |  |  |  |  |  |  |  |  |  |  |  |  |  |  |  |  |  |  |  |  |  |  |  |  |  |  |  |  |  |  |  |  |  |  |  |  |  |  |  |  |  |  |  |  |  |  |  |  |  |  |  |  |  |  |  |  |  |  |  |  |  |  |  |  |  |  |  |  |  |  |  |  |  |  |  |  |  |  |  |  |  |  |  |  |  |  |  |  |  |  |  |  |  |  |  |  |  |  |  |  |  |  |  |  |  |  |  |  |  |  |  |  |  |  |  |  |  |  |  |  |  |  |  |  |  |  |  |  |  |  |  |  |  |  |  |  |  |  |  |  |  |  |  |  |  |  |  |  |  |  |  |  |  |  |  |  |  |  |  |  |  |  |  |  |  |  |  |  |  |  |  |  |  |  |  |  |  |  |  |  |  |  |  |  |  |  |  |  |  |  |  |  |  |  |  |  |  |  |  |  |  |  |  |  |  |  |  |  |  |  |  |  |  |  |  |  |  |  |  |  |  |  |  |  |  |  |  |  |  |  |  |  |  |  |  |  |  |  |  |  |  |  |  |  |  |  |  |  |  |  |  |  |  |  |  |  |  |  |  |  |  |  |  |  |  |  |  |  |  |  |  |  |  |  |  |  |  |  |  |  |  |  |  |  |  |  |  |  |  |  |  |  |  |  |  |  |  |  |  |  |  |  |  |  |  |  |  |  |  |  |  |  |  |  |  |  |  |  |  |  |  |  |  |  |  |  |  |  |  |  |  |  |  |  |  |  |  |  |  |  |  |  |  |  |  |  |  |  |  |  |  |  |  |  |  |  |  |  |  |  |  |  |  |  |  |  |  |  |  |  |  |  |  |  |  |  |  |  |  |  |  |  |  |  |  |  |
|                             |                 |  |     |                 |  |     |                  |  |     |                  |  |     |                  |  |     |                 |  |     |                 |  |     |                 |  |     |                  |  |     |                  |  |     |                 |  |     |                  |  |     |                 |  |     |                 |  |     |                 |  |     |                 |  |     |  |  |  |  |  |  |  |  |  |  |  |  |  |  |  |  |  |  |  |  |  |  |  |  |  |  |  |  |  |  |  |  |  |  |  |  |  |  |  |  |  |  |  |  |  |  |  |  |  |  |  |  |  |  |  |  |  |  |  |  |  |  |  |  |  |  |  |  |  |  |  |  |  |  |  |  |  |  |  |  |  |  |  |  |  |  |  |  |  |  |  |  |  |  |  |  |  |  |  |  |  |  |  |  |  |  |  |  |  |  |  |  |  |  |  |  |  |  |  |  |  |  |  |  |  |  |  |  |  |  |  |  |  |  |  |  |  |  |  |  |  |  |  |  |  |  |  |  |  |  |  |  |  |  |  |  |  |  |  |  |  |  |  |  |  |  |  |  |  |  |  |  |  |  |  |  |  |  |  |  |  |  |  |  |  |  |  |  |  |  |  |  |  |  |  |  |  |  |  |  |  |  |  |  |  |  |  |  |  |  |  |  |  |  |  |  |  |  |  |  |  |  |  |  |  |  |  |  |  |  |  |  |  |  |  |  |  |  |  |  |  |  |  |  |  |  |  |  |  |  |  |  |  |  |  |  |  |  |  |  |  |  |  |  |  |  |  |  |  |  |  |  |  |  |  |  |  |  |  |  |  |  |  |  |  |  |  |  |  |  |  |  |  |  |  |  |  |  |  |  |  |  |  |  |  |  |  |  |  |  |  |  |  |  |  |  |  |  |  |  |  |  |  |  |  |  |  |  |  |  |  |  |  |  |  |  |  |  |  |  |  |  |  |  |  |  |  |  |  |  |  |  |  |  |  |  |  |  |  |  |  |  |  |  |  |  |  |  |  |  |  |  |  |  |  |  |  |  |  |  |  |  |  |  |  |  |  |  |  |  |  |  |  |  |  |  |  |  |  |  |  |  |  |  |  |  |  |  |  |  |  |  |  |  |  |  |  |  |  |  |  |  |  |  |  |  |  |  |  |  |  |  |  |  |  |  |  |  |  |  |  |  |  |  |  |  |  |  |  |  |  |  |  |  |  |  |  |  |  |  |  |  |  |  |  |  |  |  |  |  |  |  |  |  |  |  |  |  |  |  |  |  |  |  |  |  |  |  |  |  |  |  |  |  |  |  |  |  |  |  |  |  |  |  |  |  |  |  |  |  |  |  |  |  |  |  |  |  |  |  |  |  |  |  |  |  |  |  |  |  |  |  |  |  |  |  |  |  |  |  |  |  |  |  |  |  |  |  |  |  |  |  |  |  |  |  |  |  |  |  |  |  |  |  |  |  |  |  |  |  |  |  |  |  |  |  |  |  |  |  |  |  |  |  |  |  |  |  |  |  |  |  |  |  |  |  |  |  |  |  |  |  |  |  |  |  |  |  |  |  |  |  |  |  |  |  |  |  |  |  |  |  |  |  |  |  |  |  |  |  |  |  |  |  |  |  |  |  |  |  |  |  |  |  |  |  |  |  |  |  |  |  |  |  |  |  |  |  |  |  |  |  |  |  |  |  |  |  |  |  |  |  |  |  |  |  |  |  |  |  |  |  |  |  |  |  |  |  |  |  |  |  |  |  |  |  |  |  |  |  |  |  |  |  |  |  |  |  |  |  |  |  |  |  |  |  |  |  |  |  |  |  |  |  |  |  |  |  |  |  |  |  |  |  |  |  |  |  |  |  |  |  |  |  |  |  |  |  |  |  |  |  |  |  |  |  |  |  |  |  |  |  |  |  |  |  |  |  |  |  |  |  |  |  |  |  |  |  |  |  |  |  |  |  |  |  |  |  |  |  |  |  |  |  |  |  |  |  |  |  |  |  |  |  |  |  |  |  |  |  |  |  |  |  |  |  |  |  |  |  |  |  |  |  |  |  |  |  |  |  |  |  |  |  |  |  |  |  |  |  |  |  |  |  |  |  |  |  |  |  |  |  |  |  |  |  |  |  |  |  |  |  |  |  |  |  |  |  |  |  |  |  |  |  |  |  |  |  |  |  |  |  |  |  |  |  |  |  |  |  |  |  |  |  |  |  |  |  |  |  |  |  |  |  |  |  |  |  |  |  |  |  |  |  |  |  |  |  |  |  |  |  |  |  |  |  |  |  |  |  |  |  |  |  |  |  |  |  |  |  |  |  |  |  |  |  |  |  |  |  |  |  |  |  |  |  |  |  |  |  |  |  |  |  |  |  |  |  |  |  |  |  |  |  |  |  |  |  |  |  |  |  |  |  |  |  |  |  |  |  |  |  |  |  |  |  |  |  |  |  |  |  |  |  |  |  |  |  |  |  |  |  |  |  |  |  |  |  |  |  |  |  |  |  |  |  |  |  |  |  |  |  |  |  |  |  |  |  |  |  |  |  |  |  |  |  |  |  |  |  |  |  |  |  |  |  |  |  |  |  |  |  |  |  |  |  |  |  |  |  |  |  |  |  |  |  |  |  |  |  |  |  |  |  |  |  |  |  |  |  |  |  |  |  |  |  |  |  |  |  |  |  |  |  |  |  |  |  |  |  |  |  |  |  |  |  |  |  |  |  |  |  |  |  |  |  |  |  |  |  |  |  |  |  |  |  |  |  |  |  |  |  |  |  |  |  |  |  |  |  |  |  |  |  |  |  |  |  |  |  |  |  |  |  |  |  |  |  |  |  |  |  |  |  |  |  |  |  |  |  |  |  |  |  |  |  |  |  |  |  |  |  |  |  |  |  |  |  |  |  |  |  |  |  |  |  |  |  |  |  |  |  |  |  |  |  |  |  |  |  |  |  |  |  |  |  |  |  |  |  |  |  |  |  |  |  |  |  |  |  |  |  |  |  |  |  |  |  |  |  |  |  |  |  |



| Additional Parameters |         | 40Ar/39Ar | 1σ       | 37Ar/39Ar | 1σ       | 36Ar/39Ar | 1σ       | Time (days) | 37Ar (decay) | 39Ar (decay) | 40Ar (moles) |
|-----------------------|---------|-----------|----------|-----------|----------|-----------|----------|-------------|--------------|--------------|--------------|
| 15D10046              | 2.0 %   | 76.393811 | 1.171907 | 9.951285  | 0.186909 | 0.231411  | 0.003692 | 90.178      | 5.951596     | 1.00063738   | 8.977E-12    |
| 15D10048              | 2.2 %   | 58.700397 | 0.865034 | 10.137913 | 0.179826 | 0.175578  | 0.002706 | 90.197      | 5.953801     | 1.00063751   | 7.466E-12    |
| 15D10049              | 2.4 %   | 48.708117 | 0.888526 | 9.769999  | 0.213224 | 0.147043  | 0.002791 | 90.207      | 5.955026     | 1.00063759   | 5.158E-12    |
| 15D10050              | 2.6 % ✓ | 47.235841 | 0.688104 | 9.523320  | 0.170725 | 0.136793  | 0.002110 | 90.217      | 5.956170     | 1.00063765   | 6.124E-12    |
| 15D10052              | 2.8 % ✓ | 45.139910 | 0.598337 | 9.055173  | 0.147337 | 0.126307  | 0.001816 | 90.235      | 5.958376     | 1.00063779   | 6.680E-12    |
| 15D10053              | 3.0 % ✓ | 43.931454 | 0.513239 | 8.699443  | 0.130116 | 0.124191  | 0.001572 | 90.245      | 5.959520     | 1.00063786   | 7.044E-12    |
| 15D10054              | 3.3 % ✓ | 37.922199 | 0.437861 | 8.276405  | 0.126039 | 0.105248  | 0.001354 | 90.255      | 5.960665     | 1.00063792   | 6.089E-12    |
| 15D10055              | 3.6 % ✓ | 41.766440 | 0.369196 | 8.098398  | 0.094562 | 0.119794  | 0.001177 | 90.264      | 5.961728     | 1.00063799   | 9.096E-12    |
| 15D10057              | 3.9 % ✓ | 29.213191 | 0.277057 | 7.577352  | 0.093498 | 0.076859  | 0.000838 | 90.282      | 5.963854     | 1.00063811   | 5.854E-12    |
| 15D10058              | 4.3 % ✓ | 28.397947 | 0.279970 | 7.734070  | 0.100507 | 0.075481  | 0.000856 | 90.292      | 5.965000     | 1.00063818   | 5.594E-12    |
| 15D10059              | 4.6 % ✓ | 29.400697 | 0.248983 | 7.997965  | 0.087576 | 0.077336  | 0.000772 | 90.300      | 5.965981     | 1.00063824   | 6.621E-12    |
| 15D10060              | 4.9 % ✓ | 27.151703 | 0.186703 | 8.205962  | 0.076754 | 0.070518  | 0.000613 | 90.309      | 5.967045     | 1.00063831   | 7.233E-12    |
| 15D10062              | 5.2 % ✓ | 25.367144 | 0.171196 | 8.485289  | 0.075659 | 0.066489  | 0.000553 | 90.326      | 5.969092     | 1.00063843   | 7.176E-12    |
| 15D10063              | 5.5 % ✓ | 22.960787 | 0.177857 | 8.545153  | 0.086375 | 0.059475  | 0.000558 | 90.335      | 5.970075     | 1.00063849   | 5.618E-12    |
| 15D10064              | 5.8 % ✓ | 20.873379 | 0.221997 | 8.059804  | 0.108115 | 0.052910  | 0.000670 | 90.343      | 5.971057     | 1.00063855   | 3.884E-12    |
| 15D10066              | 6.1 % ✓ | 20.245446 | 0.223911 | 7.810789  | 0.111245 | 0.050339  | 0.000668 | 90.360      | 5.973105     | 1.00063867   | 3.710E-12    |
| 15D10067              | 6.5 % ✓ | 21.190745 | 0.187902 | 7.793109  | 0.092613 | 0.054672  | 0.000590 | 90.369      | 5.974170     | 1.00063873   | 4.543E-12    |
| 15D10068              | 7.0 % ✓ | 20.797435 | 0.192487 | 7.847093  | 0.091391 | 0.052751  | 0.000588 | 90.378      | 5.975154     | 1.00063879   | 4.723E-12    |
| 15D10070              | 7.6 % ✓ | 20.101996 | 0.150155 | 7.785543  | 0.074839 | 0.050644  | 0.000483 | 90.395      | 5.977203     | 1.00063891   | 5.519E-12    |
| 15D10071              | 8.4 % ✓ | 19.887329 | 0.111501 | 7.911403  | 0.060582 | 0.049070  | 0.000377 | 90.404      | 5.978269     | 1.00063898   | 6.918E-12    |
| 15D10072              | 9.4 % ✓ | 19.802462 | 0.077973 | 8.706542  | 0.048981 | 0.049309  | 0.000299 | 90.412      | 5.979253     | 1.00063904   | 1.060E-11    |
| 15D10074              | 10.5 %  | 20.328556 | 0.068616 | 10.181616 | 0.050520 | 0.048042  | 0.000262 | 90.430      | 5.981304     | 1.00063916   | 1.246E-11    |
| 15D10075              | 11.7 %  | 23.282957 | 0.075925 | 12.273240 | 0.059051 | 0.050782  | 0.000269 | 90.439      | 5.982371     | 1.00063922   | 1.398E-11    |
| 15D10076              | 13.1 %  | 32.083466 | 0.102065 | 17.252845 | 0.080104 | 0.061531  | 0.000308 | 90.447      | 5.983355     | 1.00063928   | 2.061E-11    |
| 15D10078              | 14.7 %  | 40.905916 | 0.119070 | 22.191198 | 0.097840 | 0.072798  | 0.000349 | 90.465      | 5.985408     | 1.00063940   | 2.642E-11    |
| 15D10079              | 16.5 %  | 56.195345 | 0.143169 | 29.724791 | 0.123129 | 0.088523  | 0.000380 | 90.474      | 5.986475     | 1.00063947   | 4.438E-11    |
| 15D10080              | 18.5 %  | 67.920822 | 0.151709 | 34.267403 | 0.135132 | 0.099640  | 0.000397 | 90.483      | 5.987543     | 1.00063953   | 6.170E-11    |
| 15D10082              | 19.8 %  | 79.743516 | 0.234030 | 36.333983 | 0.159520 | 0.107929  | 0.000480 | 90.500      | 5.989596     | 1.00063965   | 5.279E-11    |
| 15D10083              | 21.7 %  | 82.354734 | 0.264852 | 36.621004 | 0.168052 | 0.108510  | 0.000507 | 90.509      | 5.990664     | 1.00063972   | 4.892E-11    |
| 15D10084              | 22.8 %  | 78.165436 | 0.466467 | 32.608155 | 0.224601 | 0.104120  | 0.000772 | 90.518      | 5.991733     | 1.00063978   | 2.475E-11    |
| 15D10086              | 24.3 %  | 77.759155 | 0.692227 | 30.612141 | 0.295272 | 0.104204  | 0.001051 | 90.536      | 5.993870     | 1.00063991   | 1.613E-11    |



| Procedure<br>Blanks |        | 36Ar<br>[fA] | 1σ        | 37Ar<br>[fA] | 1σ        | 38Ar<br>[fA] | 1σ        | 39Ar<br>[fA] | 1σ        | 40Ar<br>[fA] | 1σ        |
|---------------------|--------|--------------|-----------|--------------|-----------|--------------|-----------|--------------|-----------|--------------|-----------|
| 15D10046            | 2.0 %  | 0.0275365    | 0.0008409 | 0.0138519    | 0.0299982 | 0.0149406    | 0.0346310 | 0.0429639    | 0.0286709 | 8.4178688    | 0.2652094 |
| 15D10048            | 2.2 %  | 0.0273313    | 0.0008409 | 0.0187312    | 0.0299982 | 0.0219685    | 0.0346310 | 0.0466386    | 0.0286709 | 8.2662486    | 0.2652094 |
| 15D10049            | 2.4 %  | 0.0270979    | 0.0008409 | 0.0191654    | 0.0299982 | 0.0255810    | 0.0346310 | 0.0452299    | 0.0286709 | 8.1653979    | 0.2652094 |
| 15D10050            | 2.6 %  | 0.0268209    | 0.0008409 | 0.0184679    | 0.0299982 | 0.0287645    | 0.0346310 | 0.0422664    | 0.0286709 | 8.0637886    | 0.2652094 |
| 15D10052            | 2.8 %  | 0.0261689    | 0.0008409 | 0.0149900    | 0.0299982 | 0.0343911    | 0.0346310 | 0.0334578    | 0.0286709 | 7.8554949    | 0.2652094 |
| 15D10053            | 3.0 %  | 0.0257903    | 0.0008409 | 0.0124751    | 0.0299982 | 0.0370426    | 0.0346310 | 0.0279301    | 0.0286709 | 7.7448902    | 0.2652094 |
| 15D10054            | 3.3 %  | 0.0253967    | 0.0008409 | 0.0097092    | 0.0299982 | 0.0395125    | 0.0346310 | 0.0221384    | 0.0286709 | 7.6348896    | 0.2652094 |
| 15D10055            | 3.6 %  | 0.0250253    | 0.0008409 | 0.0070505    | 0.0299982 | 0.0416433    | 0.0346310 | 0.0167543    | 0.0286709 | 7.5347364    | 0.2652094 |
| 15D10057            | 3.9 %  | 0.0242910    | 0.0008409 | 0.0018899    | 0.0299982 | 0.0454350    | 0.0346310 | 0.0067137    | 0.0286709 | 7.3450815    | 0.2652094 |
| 15D10058            | 4.3 %  | 0.0239126    | 0.0008409 | 0.0006170    | 0.0299982 | 0.0472172    | 0.0346310 | 0.0020567    | 0.0286709 | 7.2512665    | 0.2652094 |
| 15D10059            | 4.6 %  | 0.0236035    | 0.0008409 | 0.0025375    | 0.0299982 | 0.0486002    | 0.0346310 | 0.0013610    | 0.0286709 | 7.1766572    | 0.2652094 |
| 15D10060            | 4.9 %  | 0.0232883    | 0.0008409 | 0.0043390    | 0.0299982 | 0.0499479    | 0.0346310 | 0.0043697    | 0.0286709 | 7.1026769    | 0.2652094 |
| 15D10062            | 5.2 %  | 0.0227516    | 0.0008409 | 0.0069045    | 0.0299982 | 0.0520993    | 0.0346310 | 0.0078659    | 0.0286709 | 6.9829911    | 0.2652094 |
| 15D10063            | 5.5 %  | 0.0225306    | 0.0008409 | 0.0077083    | 0.0299982 | 0.0529263    | 0.0346310 | 0.0083954    | 0.0286709 | 6.9371027    | 0.2652094 |
| 15D10064            | 5.8 %  | 0.0223355    | 0.0008409 | 0.0082503    | 0.0299982 | 0.0536198    | 0.0346310 | 0.0081579    | 0.0286709 | 6.8992284    | 0.2652094 |
| 15D10066            | 6.1 %  | 0.0220154    | 0.0008409 | 0.0086653    | 0.0299982 | 0.0546360    | 0.0346310 | 0.0052370    | 0.0286709 | 6.8472411    | 0.2652094 |
| 15D10067            | 6.5 %  | 0.0218956    | 0.0008409 | 0.0086044    | 0.0299982 | 0.0549354    | 0.0346310 | 0.0024915    | 0.0286709 | 6.8350074    | 0.2652094 |
| 15D10068            | 7.0 %  | 0.0218130    | 0.0008409 | 0.0084651    | 0.0299982 | 0.0550729    | 0.0346310 | 0.0007160    | 0.0286709 | 6.8328280    | 0.2652094 |
| 15D10070            | 7.6 %  | 0.0217225    | 0.0008409 | 0.0082606    | 0.0299982 | 0.0549305    | 0.0346310 | 0.0091421    | 0.0286709 | 6.8562809    | 0.2652094 |
| 15D10071            | 8.4 %  | 0.0217154    | 0.0008409 | 0.0084186    | 0.0299982 | 0.0546276    | 0.0346310 | 0.0142277    | 0.0286709 | 6.8831488    | 0.2652094 |
| 15D10072            | 9.4 %  | 0.0217301    | 0.0008409 | 0.0088792    | 0.0299982 | 0.0542090    | 0.0346310 | 0.0191822    | 0.0286709 | 6.9165596    | 0.2652094 |
| 15D10074            | 10.5 % | 0.0218139    | 0.0008409 | 0.0113643    | 0.0299982 | 0.0529082    | 0.0346310 | 0.0296777    | 0.0286709 | 7.0112916    | 0.2652094 |
| 15D10075            | 11.7 % | 0.0218780    | 0.0008409 | 0.0138039    | 0.0299982 | 0.0520029    | 0.0346310 | 0.0348431    | 0.0286709 | 7.0729916    | 0.2652094 |
| 15D10076            | 13.1 % | 0.0219440    | 0.0008409 | 0.0169758    | 0.0299982 | 0.0510282    | 0.0346310 | 0.0391702    | 0.0286709 | 7.1367728    | 0.2652094 |
| 15D10078            | 14.7 % | 0.0220823    | 0.0008409 | 0.0271898    | 0.0299982 | 0.0485689    | 0.0346310 | 0.0459015    | 0.0286709 | 7.2879666    | 0.2652094 |
| 15D10079            | 16.5 % | 0.0221425    | 0.0008409 | 0.0348731    | 0.0299982 | 0.0470612    | 0.0346310 | 0.0476392    | 0.0286709 | 7.3746880    | 0.2652094 |
| 15D10080            | 18.5 % | 0.0221852    | 0.0008409 | 0.0445160    | 0.0299982 | 0.0453968    | 0.0346310 | 0.0477574    | 0.0286709 | 7.4656242    | 0.2652094 |
| 15D10082            | 19.8 % | 0.0221887    | 0.0008409 | 0.0695988    | 0.0299982 | 0.0417559    | 0.0346310 | 0.0421521    | 0.0286709 | 7.6480928    | 0.2652094 |
| 15D10083            | 21.7 % | 0.0221328    | 0.0008409 | 0.0866154    | 0.0299982 | 0.0396337    | 0.0346310 | 0.0354871    | 0.0286709 | 7.7444823    | 0.2652094 |
| 15D10084            | 22.8 % | 0.0220250    | 0.0008409 | 0.1067684    | 0.0299982 | 0.0373549    | 0.0346310 | 0.0257298    | 0.0286709 | 7.8400748    | 0.2652094 |
| 15D10086            | 24.3 % | 0.0216120    | 0.0008409 | 0.1578552    | 0.0299982 | 0.0323274    | 0.0346310 | 0.0048001    | 0.0286709 | 8.0227019    | 0.2652094 |



| OSU Argon Geochronology Lab |        |          |          |        |                |          |        |        |                |          |          |        |                |          |         |        |                |           |        |        |                |    |    |  |  |
|-----------------------------|--------|----------|----------|--------|----------------|----------|--------|--------|----------------|----------|----------|--------|----------------|----------|---------|--------|----------------|-----------|--------|--------|----------------|----|----|--|--|
| Intercept<br>Values         | 36Ar   |          |          |        |                | 37Ar     |        |        |                |          | 38Ar     |        |                |          |         | 39Ar   |                |           |        |        | 40Ar           |    |    |  |  |
|                             | [fA]   | 1σ       | r2       |        |                | [fA]     | 1σ     | r2     |                |          | [fA]     | 1σ     | r2             |          |         | [fA]   | 1σ             | r2        |        |        | [fA]           | 1σ | r2 |  |  |
| 15D10046                    | 2.0 %  | 0.559117 | 0.001828 | 0.5953 | EXP 150 of 150 | 3.9997   | 0.0295 | 0.3535 | EXP 150 of 150 | 0.300866 | 0.028116 | 0.0001 | EXP 150 of 150 | 2.47370  | 0.02345 | 0.0666 | EXP 150 of 150 | 195.9977  | 0.1595 | 0.3184 | EXP 150 of 150 |    |    |  |  |
| 15D10048                    | 2.2 %  | 0.463869 | 0.001537 | 0.6593 | EXP 150 of 150 | 4.4051   | 0.0295 | 0.4741 | EXP 150 of 150 | 0.243496 | 0.030018 | 0.0029 | EXP 150 of 150 | 2.67754  | 0.02560 | 0.1086 | EXP 150 of 150 | 164.2703  | 0.1001 | 0.6083 | EXP 150 of 150 |    |    |  |  |
| 15D10049                    | 2.4 %  | 0.331500 | 0.001329 | 0.4620 | EXP 150 of 150 | 3.5299   | 0.0294 | 0.3016 | EXP 149 of 150 | 0.219872 | 0.025275 | 0.0058 | EXP 150 of 150 | 2.23580  | 0.02721 | 0.0811 | EXP 149 of 150 | 115.9482  | 0.0907 | 0.1967 | EXP 149 of 150 |    |    |  |  |
| 15D10050                    | 2.6 %  | 0.373502 | 0.001416 | 0.5911 | EXP 150 of 150 | 4.2159   | 0.0309 | 0.4176 | EXP 150 of 150 | 0.294667 | 0.028425 | 0.0152 | EXP 150 of 150 | 2.72402  | 0.02586 | 0.1679 | EXP 150 of 150 | 136.0258  | 0.0624 | 0.7554 | EXP 150 of 150 |    |    |  |  |
| 15D10052                    | 2.8 %  | 0.391521 | 0.001704 | 0.5898 | EXP 150 of 150 | 4.5786   | 0.0290 | 0.4598 | EXP 150 of 150 | 0.300705 | 0.030338 | 0.0054 | EXP 150 of 150 | 3.09427  | 0.02802 | 0.2415 | EXP 150 of 150 | 147.4241  | 0.0460 | 0.9559 | EXP 150 of 150 |    |    |  |  |
| 15D10053                    | 3.0 %  | 0.415047 | 0.001501 | 0.6788 | EXP 149 of 150 | 4.7686   | 0.0305 | 0.4658 | EXP 150 of 150 | 0.295524 | 0.028676 | 0.0000 | EXP 150 of 150 | 3.34458  | 0.02527 | 0.2754 | EXP 149 of 150 | 154.9308  | 0.0342 | 0.9847 | EXP 150 of 150 |    |    |  |  |
| 15D10054                    | 3.3 %  | 0.355749 | 0.001572 | 0.5766 | EXP 150 of 150 | 4.5444   | 0.0320 | 0.4150 | EXP 150 of 150 | 0.276622 | 0.025523 | 0.0004 | EXP 150 of 150 | 3.34349  | 0.02439 | 0.3163 | EXP 150 of 150 | 134.8677  | 0.0448 | 0.9489 | EXP 150 of 150 |    |    |  |  |
| 15D10055                    | 3.6 %  | 0.535000 | 0.001625 | 0.7358 | EXP 150 of 150 | 6.0357   | 0.0303 | 0.5533 | EXP 150 of 150 | 0.376957 | 0.029045 | 0.0034 | EXP 150 of 150 | 4.52145  | 0.02673 | 0.4153 | EXP 150 of 150 | 197.5915  | 0.0401 | 0.9936 | EXP 150 of 150 |    |    |  |  |
| 15D10057                    | 3.9 %  | 0.325356 | 0.001291 | 0.5708 | EXP 150 of 150 | 5.1987   | 0.0252 | 0.5992 | EXP 150 of 150 | 0.253306 | 0.028508 | 0.0095 | EXP 150 of 150 | 4.15166  | 0.02517 | 0.4534 | EXP 150 of 150 | 129.6627  | 0.0375 | 0.9648 | EXP 150 of 150 |    |    |  |  |
| 15D10058                    | 4.3 %  | 0.314557 | 0.001323 | 0.5601 | EXP 150 of 150 | 5.2176   | 0.0302 | 0.4504 | EXP 148 of 150 | 0.315872 | 0.024847 | 0.0221 | EXP 150 of 150 | 4.07659  | 0.02641 | 0.2927 | EXP 150 of 150 | 124.1353  | 0.0384 | 0.9504 | EXP 150 of 150 |    |    |  |  |
| 15D10059                    | 4.6 %  | 0.364030 | 0.001449 | 0.6279 | EXP 150 of 150 | 6.1690   | 0.0261 | 0.6244 | EXP 150 of 150 | 0.328836 | 0.026049 | 0.0090 | EXP 150 of 150 | 4.65659  | 0.02537 | 0.4891 | EXP 150 of 150 | 145.5153  | 0.0375 | 0.9808 | EXP 150 of 150 |    |    |  |  |
| 15D10060                    | 4.9 %  | 0.390488 | 0.001582 | 0.6178 | EXP 150 of 150 | 7.4872   | 0.0308 | 0.6784 | EXP 150 of 150 | 0.408260 | 0.028489 | 0.0164 | EXP 150 of 150 | 5.50564  | 0.02247 | 0.6914 | EXP 150 of 150 | 158.2291  | 0.0418 | 0.9833 | EXP 150 of 150 |    |    |  |  |
| 15D10062                    | 5.2 %  | 0.390414 | 0.001375 | 0.6930 | EXP 150 of 150 | 8.2210   | 0.0301 | 0.7168 | EXP 150 of 150 | 0.413470 | 0.028914 | 0.0071 | EXP 150 of 150 | 5.84345  | 0.02477 | 0.6381 | EXP 150 of 150 | 156.9225  | 0.0401 | 0.9855 | EXP 150 of 150 |    |    |  |  |
| 15D10063                    | 5.5 %  | 0.307000 | 0.001171 | 0.6166 | EXP 150 of 150 | 7.1615   | 0.0315 | 0.6588 | EXP 150 of 150 | 0.360451 | 0.026840 | 0.0103 | EXP 150 of 150 | 5.05280  | 0.02388 | 0.5817 | EXP 150 of 150 | 124.3271  | 0.0401 | 0.9374 | EXP 150 of 150 |    |    |  |  |
| 15D10064                    | 5.8 %  | 0.214784 | 0.001080 | 0.2651 | EXP 150 of 150 | 5.1386   | 0.0296 | 0.5563 | EXP 150 of 150 | 0.281934 | 0.028914 | 0.0106 | EXP 150 of 150 | 3.84070  | 0.02617 | 0.3786 | EXP 150 of 150 | 88.0543   | 0.0430 | 0.0518 | EXP 150 of 150 |    |    |  |  |
| 15D10066                    | 6.1 %  | 0.202329 | 0.001087 | 0.2695 | EXP 150 of 150 | 4.9033   | 0.0327 | 0.4514 | EXP 150 of 150 | 0.265214 | 0.025133 | 0.0106 | EXP 150 of 150 | 3.78512  | 0.02751 | 0.3340 | EXP 150 of 150 | 84.3645   | 0.0414 | 0.0025 | EXP 149 of 150 |    |    |  |  |
| 15D10067                    | 6.5 %  | 0.251000 | 0.001141 | 0.4132 | EXP 150 of 150 | 5.7207   | 0.0326 | 0.5085 | EXP 150 of 150 | 0.347084 | 0.026014 | 0.0046 | EXP 150 of 150 | 4.43176  | 0.02365 | 0.4706 | EXP 150 of 150 | 101.7550  | 0.0380 | 0.8412 | EXP 149 of 150 |    |    |  |  |
| 15D10068                    | 7.0 %  | 0.256000 | 0.001182 | 0.3821 | EXP 150 of 150 | 6.1009   | 0.0290 | 0.6311 | EXP 149 of 150 | 0.374668 | 0.028306 | 0.0001 | EXP 150 of 150 | 4.69842  | 0.02994 | 0.4170 | EXP 150 of 150 | 105.5258  | 0.0370 | 0.8755 | EXP 150 of 150 |    |    |  |  |
| 15D10070                    | 7.6 %  | 0.293504 | 0.001311 | 0.5928 | EXP 149 of 150 | 7.3126   | 0.0280 | 0.6859 | EXP 150 of 150 | 0.510089 | 0.026210 | 0.0003 | EXP 150 of 150 | 5.68775  | 0.02810 | 0.5832 | EXP 150 of 150 | 122.1677  | 0.0367 | 0.9643 | EXP 150 of 150 |    |    |  |  |
| 15D10071                    | 8.4 %  | 0.355406 | 0.001375 | 0.6412 | EXP 150 of 150 | 9.4122   | 0.0298 | 0.7492 | EXP 150 of 150 | 0.727033 | 0.027725 | 0.0411 | EXP 150 of 150 | 7.21005  | 0.02462 | 0.7663 | EXP 150 of 150 | 151.4431  | 0.0372 | 0.9865 | EXP 149 of 150 |    |    |  |  |
| 15D10072                    | 9.4 %  | 0.537777 | 0.001823 | 0.7337 | EXP 150 of 150 | 15.9331  | 0.0305 | 0.8958 | EXP 150 of 150 | 1.352858 | 0.025350 | 0.1541 | EXP 150 of 150 | 11.09342 | 0.02911 | 0.8488 | EXP 150 of 150 | 228.4424  | 0.0431 | 0.9957 | EXP 150 of 150 |    |    |  |  |
| 15D10074                    | 10.5 % | 0.597469 | 0.001794 | 0.7945 | EXP 150 of 150 | 21.3253  | 0.0295 | 0.9469 | EXP 149 of 150 | 1.674722 | 0.026636 | 0.1457 | EXP 150 of 150 | 12.70905 | 0.02775 | 0.8926 | EXP 150 of 150 | 267.3839  | 0.0484 | 0.9968 | EXP 150 of 150 |    |    |  |  |
| 15D10075                    | 11.7 % | 0.617781 | 0.001767 | 0.7977 | EXP 150 of 150 | 25.1704  | 0.0312 | 0.9550 | EXP 150 of 150 | 1.471315 | 0.026783 | 0.0771 | EXP 150 of 150 | 12.45197 | 0.02493 | 0.9080 | EXP 150 of 150 | 299.1184  | 0.0495 | 0.9976 | EXP 150 of 150 |    |    |  |  |
| 15D10076                    | 13.1 % | 0.794690 | 0.001991 | 0.8520 | EXP 150 of 150 | 37.8572  | 0.0338 | 0.9757 | EXP 150 of 150 | 1.479647 | 0.024109 | 0.1387 | EXP 150 of 150 | 13.32818 | 0.02866 | 0.8872 | EXP 150 of 150 | 437.8270  | 0.0536 | 0.9990 | EXP 150 of 150 |    |    |  |  |
| 15D10078                    | 14.7 % | 0.941078 | 0.002316 | 0.8669 | EXP 150 of 150 | 48.9351  | 0.0319 | 0.9870 | EXP 150 of 150 | 1.454106 | 0.025763 | 0.0848 | EXP 150 of 150 | 13.40404 | 0.02391 | 0.9187 | EXP 150 of 150 | 559.2681  | 0.0637 | 0.9992 | EXP 150 of 150 |    |    |  |  |
| 15D10079                    | 16.5 % | 1.388664 | 0.002790 | 0.9117 | EXP 148 of 150 | 80.1300  | 0.0363 | 0.9936 | EXP 150 of 150 | 1.924005 | 0.026563 | 0.2323 | EXP 150 of 150 | 16.38240 | 0.02783 | 0.9227 | EXP 150 of 150 | 934.6409  | 0.0725 | 0.9997 | EXP 150 of 150 |    |    |  |  |
| 15D10080                    | 18.5 % | 1.791598 | 0.003165 | 0.9349 | EXP 150 of 150 | 106.2449 | 0.0364 | 0.9964 | EXP 150 of 150 | 2.138459 | 0.025193 | 0.1054 | EXP 150 of 150 | 18.83867 | 0.02784 | 0.9421 | EXP 150 of 150 | 1296.7303 | 0.0829 | 0.9998 | EXP 150 of 150 |    |    |  |  |
| 15D10082                    | 19.8 % | 1.418771 | 0.002546 | 0.9237 | EXP 150 of 150 | 82.0942  | 0.0346 | 0.9946 | EXP 150 of 150 | 1.338561 | 0.028626 | 0.0736 | EXP 150 of 150 | 13.73465 | 0.02650 | 0.8945 | EXP 150 of 150 | 1110.6327 | 0.0777 | 0.9998 | EXP 150 of 150 |    |    |  |  |
| 15D10083                    | 21.7 % | 1.282166 | 0.002403 | 0.9189 | EXP 150 of 150 | 74.2628  | 0.0341 | 0.9936 | EXP 150 of 150 | 1.060509 | 0.027711 | 0.0152 | EXP 150 of 150 | 12.32298 | 0.02579 | 0.8804 | EXP 150 of 150 | 1029.9619 | 0.0816 | 0.9997 | EXP 150 of 150 |    |    |  |  |
| 15D10084                    | 22.8 % | 0.666468 | 0.002071 | 0.7780 | EXP 150 of 150 | 35.3052  | 0.0345 | 0.9715 | EXP 150 of 150 | 0.542809 | 0.025726 | 0.0123 | EXP 150 of 150 | 6.57516  | 0.02600 | 0.6439 | EXP 150 of 150 | 524.9818  | 0.0599 | 0.9992 | EXP 150 of 150 |    |    |  |  |
| 15D10086                    | 24.3 % | 0.444212 | 0.001437 | 0.7516 | EXP 150 of 150 | 21.8015  | 0.0313 | 0.9383 | EXP 150 of 150 | 0.301243 | 0.027497 | 0.0021 | EXP 150 of 150 | 4.28659  | 0.02486 | 0.4369 | EXP 150 of 150 | 345.1087  | 0.0466 | 0.9986 | EXP 150 of 150 |    |    |  |  |



| OSU Argon Geochronology Lab |        |        |            |                   |             |      |                  |                  |       |                     |                    |       |            |       |               |       |             |       |              |                        |     |       |      |      |     |        |             |       |       |         |  |  |  |  |
|-----------------------------|--------|--------|------------|-------------------|-------------|------|------------------|------------------|-------|---------------------|--------------------|-------|------------|-------|---------------|-------|-------------|-------|--------------|------------------------|-----|-------|------|------|-----|--------|-------------|-------|-------|---------|--|--|--|--|
| Sample Parameters           |        | Sample | Material   | Location          | Analyst     | Temp | Standard Name    | Standard (in Ma) | %1σ   | Standard Reference  | Standard 40Ar/39Ar | %1σ   | J          | %1σ   | Air 40Ar/36Ar | %1σ   | MDF (lin)   | %1σ   | Volume Ratio | Sensitivity (mol/volt) | Day | Month | Year | Hour | Min | Resist | Irradiation | X-pos | Y-pos | Z/H-pos |  |  |  |  |
| 15D10046                    | 2.0 %  | 274-3  | Groundmass | Kerguelen Plateau | Dan Miggins | 2    | FCT-NM (7B23-14) | 28.201           | 0.082 | Kuiper et al (2008) | 8.86043            | 0.116 | 0.00177389 | 0.116 | 303.404       | 0.116 | 0.993478814 | 0.065 | 1            | 4.8E-14                | 31  | MAR   | 2015 | 19   | 22  | 1      | 14-OSU-07   | 0.00  | 0.00  | 32.21   |  |  |  |  |
| 15D10048                    | 2.2 %  | 274-3  | Groundmass | Kerguelen Plateau | Dan Miggins | 2.2  | FCT-NM (7B23-14) | 28.201           | 0.082 | Kuiper et al (2008) | 8.86043            | 0.116 | 0.00177389 | 0.116 | 303.404       | 0.116 | 0.993478814 | 0.065 | 1            | 4.8E-14                | 31  | MAR   | 2015 | 19   | 49  | 1      | 14-OSU-07   | 0.00  | 0.00  | 32.21   |  |  |  |  |
| 15D10049                    | 2.4 %  | 274-3  | Groundmass | Kerguelen Plateau | Dan Miggins | 2.4  | FCT-NM (7B23-14) | 28.201           | 0.082 | Kuiper et al (2008) | 8.86043            | 0.116 | 0.00177389 | 0.116 | 303.404       | 0.116 | 0.993478814 | 0.065 | 1            | 4.8E-14                | 31  | MAR   | 2015 | 20   | 4   | 1      | 14-OSU-07   | 0.00  | 0.00  | 32.21   |  |  |  |  |
| 15D10050                    | 2.6 %  | 274-3  | Groundmass | Kerguelen Plateau | Dan Miggins | 2.6  | FCT-NM (7B23-14) | 28.201           | 0.082 | Kuiper et al (2008) | 8.86043            | 0.116 | 0.00177389 | 0.116 | 303.404       | 0.116 | 0.993478814 | 0.065 | 1            | 4.8E-14                | 31  | MAR   | 2015 | 20   | 18  | 1      | 14-OSU-07   | 0.00  | 0.00  | 32.21   |  |  |  |  |
| 15D10052                    | 2.8 %  | 274-3  | Groundmass | Kerguelen Plateau | Dan Miggins | 2.8  | FCT-NM (7B23-14) | 28.201           | 0.082 | Kuiper et al (2008) | 8.86043            | 0.116 | 0.00177389 | 0.116 | 303.404       | 0.116 | 0.993478814 | 0.065 | 1            | 4.8E-14                | 31  | MAR   | 2015 | 20   | 45  | 1      | 14-OSU-07   | 0.00  | 0.00  | 32.21   |  |  |  |  |
| 15D10053                    | 3.0 %  | 274-3  | Groundmass | Kerguelen Plateau | Dan Miggins | 3    | FCT-NM (7B23-14) | 28.201           | 0.082 | Kuiper et al (2008) | 8.86043            | 0.116 | 0.00177389 | 0.116 | 303.404       | 0.116 | 0.993478814 | 0.065 | 1            | 4.8E-14                | 31  | MAR   | 2015 | 20   | 59  | 1      | 14-OSU-07   | 0.00  | 0.00  | 32.21   |  |  |  |  |
| 15D10054                    | 3.3 %  | 274-3  | Groundmass | Kerguelen Plateau | Dan Miggins | 3.3  | FCT-NM (7B23-14) | 28.201           | 0.082 | Kuiper et al (2008) | 8.86043            | 0.116 | 0.00177389 | 0.116 | 303.404       | 0.116 | 0.993478814 | 0.065 | 1            | 4.8E-14                | 31  | MAR   | 2015 | 21   | 13  | 1      | 14-OSU-07   | 0.00  | 0.00  | 32.21   |  |  |  |  |
| 15D10055                    | 3.6 %  | 274-3  | Groundmass | Kerguelen Plateau | Dan Miggins | 3.6  | FCT-NM (7B23-14) | 28.201           | 0.082 | Kuiper et al (2008) | 8.86043            | 0.116 | 0.00177389 | 0.116 | 303.404       | 0.116 | 0.993478814 | 0.065 | 1            | 4.8E-14                | 31  | MAR   | 2015 | 21   | 26  | 1      | 14-OSU-07   | 0.00  | 0.00  | 32.21   |  |  |  |  |
| 15D10057                    | 3.9 %  | 274-3  | Groundmass | Kerguelen Plateau | Dan Miggins | 3.9  | FCT-NM (7B23-14) | 28.201           | 0.082 | Kuiper et al (2008) | 8.86043            | 0.116 | 0.00177389 | 0.116 | 303.404       | 0.116 | 0.993478814 | 0.065 | 1            | 4.8E-14                | 31  | MAR   | 2015 | 21   | 52  | 1      | 14-OSU-07   | 0.00  | 0.00  | 32.21   |  |  |  |  |
| 15D10058                    | 4.3 %  | 274-3  | Groundmass | Kerguelen Plateau | Dan Miggins | 4.3  | FCT-NM (7B23-14) | 28.201           | 0.082 | Kuiper et al (2008) | 8.86043            | 0.116 | 0.00177389 | 0.116 | 303.404       | 0.116 | 0.993478814 | 0.065 | 1            | 4.8E-14                | 31  | MAR   | 2015 | 22   | 6   | 1      | 14-OSU-07   | 0.00  | 0.00  | 32.21   |  |  |  |  |
| 15D10059                    | 4.6 %  | 274-3  | Groundmass | Kerguelen Plateau | Dan Miggins | 4.6  | FCT-NM (7B23-14) | 28.201           | 0.082 | Kuiper et al (2008) | 8.86043            | 0.116 | 0.00177389 | 0.116 | 303.404       | 0.116 | 0.993478814 | 0.065 | 1            | 4.8E-14                | 31  | MAR   | 2015 | 22   | 18  | 1      | 14-OSU-07   | 0.00  | 0.00  | 32.21   |  |  |  |  |
| 15D10060                    | 4.9 %  | 274-3  | Groundmass | Kerguelen Plateau | Dan Miggins | 4.9  | FCT-NM (7B23-14) | 28.201           | 0.082 | Kuiper et al (2008) | 8.86043            | 0.116 | 0.00177389 | 0.116 | 303.404       | 0.116 | 0.993478814 | 0.065 | 1            | 4.8E-14                | 31  | MAR   | 2015 | 22   | 31  | 1      | 14-OSU-07   | 0.00  | 0.00  | 32.21   |  |  |  |  |
| 15D10062                    | 5.2 %  | 274-3  | Groundmass | Kerguelen Plateau | Dan Miggins | 5.2  | FCT-NM (7B23-14) | 28.201           | 0.082 | Kuiper et al (2008) | 8.86043            | 0.116 | 0.00177389 | 0.116 | 303.404       | 0.116 | 0.993478814 | 0.065 | 1            | 4.8E-14                | 31  | MAR   | 2015 | 22   | 56  | 1      | 14-OSU-07   | 0.00  | 0.00  | 32.21   |  |  |  |  |
| 15D10063                    | 5.5 %  | 274-3  | Groundmass | Kerguelen Plateau | Dan Miggins | 5.5  | FCT-NM (7B23-14) | 28.201           | 0.082 | Kuiper et al (2008) | 8.86043            | 0.116 | 0.00177389 | 0.116 | 303.404       | 0.116 | 0.993478814 | 0.065 | 1            | 4.8E-14                | 31  | MAR   | 2015 | 23   | 8   | 1      | 14-OSU-07   | 0.00  | 0.00  | 32.21   |  |  |  |  |
| 15D10064                    | 5.8 %  | 274-3  | Groundmass | Kerguelen Plateau | Dan Miggins | 5.8  | FCT-NM (7B23-14) | 28.201           | 0.082 | Kuiper et al (2008) | 8.86043            | 0.116 | 0.00177389 | 0.116 | 303.404       | 0.116 | 0.993478814 | 0.065 | 1            | 4.8E-14                | 31  | MAR   | 2015 | 23   | 20  | 1      | 14-OSU-07   | 0.00  | 0.00  | 32.21   |  |  |  |  |
| 15D10066                    | 6.1 %  | 274-3  | Groundmass | Kerguelen Plateau | Dan Miggins | 6.1  | FCT-NM (7B23-14) | 28.201           | 0.082 | Kuiper et al (2008) | 8.86043            | 0.116 | 0.00177389 | 0.116 | 303.404       | 0.116 | 0.993478814 | 0.065 | 1            | 4.8E-14                | 31  | MAR   | 2015 | 23   | 45  | 1      | 14-OSU-07   | 0.00  | 0.00  | 32.21   |  |  |  |  |
| 15D10067                    | 6.5 %  | 274-3  | Groundmass | Kerguelen Plateau | Dan Miggins | 6.5  | FCT-NM (7B23-14) | 28.201           | 0.082 | Kuiper et al (2008) | 8.86043            | 0.116 | 0.00177389 | 0.116 | 303.404       | 0.116 | 0.993478814 | 0.065 | 1            | 4.8E-14                | 31  | MAR   | 2015 | 23   | 58  | 1      | 14-OSU-07   | 0.00  | 0.00  | 32.21   |  |  |  |  |
| 15D10068                    | 7.0 %  | 274-3  | Groundmass | Kerguelen Plateau | Dan Miggins | 7    | FCT-NM (7B23-14) | 28.201           | 0.082 | Kuiper et al (2008) | 8.86043            | 0.116 | 0.00177389 | 0.116 | 303.404       | 0.116 | 0.993478814 | 0.065 | 1            | 4.8E-14                | 1   | APR   | 2015 | 0    | 10  | 1      | 14-OSU-07   | 0.00  | 0.00  | 32.21   |  |  |  |  |
| 15D10070                    | 7.6 %  | 274-3  | Groundmass | Kerguelen Plateau | Dan Miggins | 7.6  | FCT-NM (7B23-14) | 28.201           | 0.082 | Kuiper et al (2008) | 8.86043            | 0.116 | 0.00177389 | 0.116 | 303.404       | 0.116 | 0.993478814 | 0.065 | 1            | 4.8E-14                | 1   | APR   | 2015 | 0    | 35  | 1      | 14-OSU-07   | 0.00  | 0.00  | 32.21   |  |  |  |  |
| 15D10071                    | 8.4 %  | 274-3  | Groundmass | Kerguelen Plateau | Dan Miggins | 8.4  | FCT-NM (7B23-14) | 28.201           | 0.082 | Kuiper et al (2008) | 8.86043            | 0.116 | 0.00177389 | 0.116 | 303.404       | 0.116 | 0.993478814 | 0.065 | 1            | 4.8E-14                | 1   | APR   | 2015 | 0    | 48  | 1      | 14-OSU-07   | 0.00  | 0.00  | 32.21   |  |  |  |  |
| 15D10072                    | 9.4 %  | 274-3  | Groundmass | Kerguelen Plateau | Dan Miggins | 9.4  | FCT-NM (7B23-14) | 28.201           | 0.082 | Kuiper et al (2008) | 8.86043            | 0.116 | 0.00177389 | 0.116 | 303.404       | 0.116 | 0.993478814 | 0.065 | 1            | 4.8E-14                | 1   | APR   | 2015 | 1    | 0   | 1      | 14-OSU-07   | 0.00  | 0.00  | 32.21   |  |  |  |  |
| 15D10074                    | 10.5 % | 274-3  | Groundmass | Kerguelen Plateau | Dan Miggins | 10.5 | FCT-NM (7B23-14) | 28.201           | 0.082 | Kuiper et al (2008) | 8.86043            | 0.116 | 0.00177389 | 0.116 | 303.404       | 0.116 | 0.993478814 | 0.065 | 1            | 4.8E-14                | 1   | APR   | 2015 | 1    | 25  | 1      | 14-OSU-07   | 0.00  | 0.00  | 32.21   |  |  |  |  |
| 15D10075                    | 11.7 % | 274-3  | Groundmass | Kerguelen Plateau | Dan Miggins | 11.7 | FCT-NM (7B23-14) | 28.201           | 0.082 | Kuiper et al (2008) | 8.86043            | 0.116 | 0.00177389 | 0.116 | 303.404       | 0.116 | 0.993478814 | 0.065 | 1            | 4.8E-14                | 1   | APR   | 2015 | 1    | 38  | 1      | 14-OSU-07   | 0.00  | 0.00  | 32.21   |  |  |  |  |
| 15D10076                    | 13.1 % | 274-3  | Groundmass | Kerguelen Plateau | Dan Miggins | 13.1 | FCT-NM (7B23-14) | 28.201           | 0.082 | Kuiper et al (2008) | 8.86043            | 0.116 | 0.00177389 | 0.116 | 303.404       | 0.116 | 0.993478814 | 0.065 | 1            | 4.8E-14                | 1   | APR   | 2015 | 1    | 50  | 1      | 14-OSU-07   | 0.00  | 0.00  | 32.21   |  |  |  |  |
| 15D10078                    | 14.7 % | 274-3  | Groundmass | Kerguelen Plateau | Dan Miggins | 14.7 | FCT-NM (7B23-14) | 28.201           | 0.082 | Kuiper et al (2008) | 8.86043            | 0.116 | 0.00177389 | 0.116 | 303.404       | 0.116 | 0.993478814 | 0.065 | 1            | 4.8E-14                | 1   | APR   | 2015 | 2    | 15  | 1      | 14-OSU-07   | 0.00  | 0.00  | 32.21   |  |  |  |  |
| 15D10079                    | 16.5 % | 274-3  | Groundmass | Kerguelen Plateau | Dan Miggins | 16.5 | FCT-NM (7B23-14) | 28.201           | 0.082 | Kuiper et al (2008) | 8.86043            | 0.116 | 0.00177389 | 0.116 | 303.404       | 0.116 | 0.993478814 | 0.065 | 1            | 4.8E-14                | 1   | APR   | 2015 | 2    | 28  | 1      | 14-OSU-07   | 0.00  | 0.00  | 32.21   |  |  |  |  |
| 15D10080                    | 18.5 % | 274-3  | Groundmass | Kerguelen Plateau | Dan Miggins | 18.5 | FCT-NM (7B23-14) | 28.201           | 0.082 | Kuiper et al (2008) | 8.86043            | 0.116 | 0.00177389 | 0.116 | 303.404       | 0.116 | 0.993478814 | 0.065 | 1            | 4.8E-14                | 1   | APR   | 2015 | 2    | 41  | 1      | 14-OSU-07   | 0.00  | 0.00  | 32.21   |  |  |  |  |
| 15D10082                    | 19.8 % | 274-3  | Groundmass | Kerguelen Plateau | Dan Miggins | 19.8 | FCT-NM (7B23-14) | 28.201           | 0.082 | Kuiper et al (2008) | 8.86043            | 0.116 | 0.00177389 | 0.116 | 303.404       | 0.116 | 0.993478814 | 0.065 | 1            | 4.8E-14                | 1   | APR   | 2015 | 3    | 6   | 1      | 14-OSU-07   | 0.00  | 0.00  | 32.21   |  |  |  |  |
| 15D10083                    | 21.7 % | 274-3  | Groundmass | Kerguelen Plateau | Dan Miggins | 21.7 | FCT-NM (7B23-14) | 28.201           | 0.082 | Kuiper et al (2008) | 8.86043            | 0.116 | 0.00177389 | 0.116 | 303.404       | 0.116 | 0.993478814 | 0.065 | 1            | 4.8E-14                | 1   | APR   | 2015 | 3    | 19  | 1      | 14-OSU-07   | 0.00  | 0.00  | 32.21   |  |  |  |  |
| 15D10084                    | 22.8 % | 274-3  | Groundmass | Kerguelen Plateau | Dan Miggins | 22.8 | FCT-NM (7B23-14) | 28.201           | 0.082 | Kuiper et al (2008) | 8.86043            | 0.116 | 0.00177389 | 0.116 | 303.404       | 0.116 | 0.993478814 | 0.065 | 1            | 4.8E-14                | 1   | APR   | 2015 | 3    | 32  | 1      | 14-OSU-07   | 0.00  | 0.00  | 32.21   |  |  |  |  |
| 15D10086                    | 24.3 % | 274-3  | Groundmass | Kerguelen Plateau | Dan Miggins | 24.3 | FCT-NM (7B23-14) | 28.201           | 0.082 | Kuiper et al (2008) | 8.86043            | 0.116 | 0.00177389 | 0.116 | 303.404       | 0.116 | 0.993478814 | 0.065 | 1            | 4.8E-14                | 1   | APR   | 2015 | 3    | 58  | 1      | 14-OSU-07   | 0.00  | 0.00  | 32.21   |  |  |  |  |



[illegible]



| OSU Argon Geochronology Lab |          |       |          |       |          |        |          |       |           |          |           |           |           |          |          |         |          |         |           |     |      |      |      |     |       |     |   |
|-----------------------------|----------|-------|----------|-------|----------|--------|----------|-------|-----------|----------|-----------|-----------|-----------|----------|----------|---------|----------|---------|-----------|-----|------|------|------|-----|-------|-----|---|
| Irradiation<br>Constants    |          |       |          |       |          |        |          |       |           |          |           |           |           |          |          |         |          |         |           |     |      |      |      |     |       |     |   |
|                             | 40/36(a) | %1σ   | 40/36(c) | %1σ   | 38/36(a) | %1σ    | 38/36(c) | %1σ   | 39/37(ca) | %1σ      | 38/37(ca) | %1σ       | 36/37(ca) | %1σ      | 40/39(k) | %1σ     | 38/39(k) | %1σ     | 36/38(cl) | %1σ | K/Ca | %1σ  | K/Cl | %1σ | Ca/Cl | %1σ |   |
| 15D10046                    | 2.0 %    | 295.5 | 0        | 0.018 | 35       | 0.1869 | 0        | 1.493 | 3         | 0.000673 | 0         | 0.0000139 | 0         | 0.000264 | 0        | 0.00101 | 0        | 0.01138 | 0         | 0   | 0    | 0.43 | 0    | 0   | 0     | 0   | 0 |
| 15D10048                    | 2.2 %    | 295.5 | 0        | 0.018 | 35       | 0.1869 | 0        | 1.493 | 3         | 0.000673 | 0         | 0.0000139 | 0         | 0.000264 | 0        | 0.00101 | 0        | 0.01138 | 0         | 0   | 0    | 0.43 | 0    | 0   | 0     | 0   | 0 |
| 15D10049                    | 2.4 %    | 295.5 | 0        | 0.018 | 35       | 0.1869 | 0        | 1.493 | 3         | 0.000673 | 0         | 0.0000139 | 0         | 0.000264 | 0        | 0.00101 | 0        | 0.01138 | 0         | 0   | 0    | 0.43 | 0    | 0   | 0     | 0   | 0 |
| 15D10050                    | 2.6 %    | 295.5 | 0        | 0.018 | 35       | 0.1869 | 0        | 1.493 | 3         | 0.000673 | 0         | 0.0000139 | 0         | 0.000264 | 0        | 0.00101 | 0        | 0.01138 | 0         | 0   | 0    | 0.43 | 0    | 0   | 0     | 0   | 0 |
| 15D10052                    | 2.8 %    | 295.5 | 0        | 0.018 | 35       | 0.1869 | 0        | 1.493 | 3         | 0.000673 | 0         | 0.0000139 | 0         | 0.000264 | 0        | 0.00101 | 0        | 0.01138 | 0         | 0   | 0    | 0.43 | 0    | 0   | 0     | 0   | 0 |
| 15D10053                    | 3.0 %    | 295.5 | 0        | 0.018 | 35       | 0.1869 | 0        | 1.493 | 3         | 0.000673 | 0         | 0.0000139 | 0         | 0.000264 | 0        | 0.00101 | 0        | 0.01138 | 0         | 0   | 0    | 0.43 | 0    | 0   | 0     | 0   | 0 |
| 15D10054                    | 3.3 %    | 295.5 | 0        | 0.018 | 35       | 0.1869 | 0        | 1.493 | 3         | 0.000673 | 0         | 0.0000139 | 0         | 0.000264 | 0        | 0.00101 | 0        | 0.01138 | 0         | 0   | 0    | 0.43 | 0    | 0   | 0     | 0   | 0 |
| 15D10055                    | 3.6 %    | 295.5 | 0        | 0.018 | 35       | 0.1869 | 0        | 1.493 | 3         | 0.000673 | 0         | 0.0000139 | 0         | 0.000264 | 0        | 0.00101 | 0        | 0.01138 | 0         | 0   | 0    | 0.43 | 0    | 0   | 0     | 0   | 0 |
| 15D10057                    | 3.9 %    | 295.5 | 0        | 0.018 | 35       | 0.1869 | 0        | 1.493 | 3         | 0.000673 | 0         | 0.0000139 | 0         | 0.000264 | 0        | 0.00101 | 0        | 0.01138 | 0         | 0   | 0    | 0.43 | 0    | 0   | 0     | 0   | 0 |
| 15D10058                    | 4.3 %    | 295.5 | 0        | 0.018 | 35       | 0.1869 | 0        | 1.493 | 3         | 0.000673 | 0         | 0.0000139 | 0         | 0.000264 | 0        | 0.00101 | 0        | 0.01138 | 0         | 0   | 0    | 0.43 | 0    | 0   | 0     | 0   | 0 |
| 15D10059                    | 4.6 %    | 295.5 | 0        | 0.018 | 35       | 0.1869 | 0        | 1.493 | 3         | 0.000673 | 0         | 0.0000139 | 0         | 0.000264 | 0        | 0.00101 | 0        | 0.01138 | 0         | 0   | 0    | 0.43 | 0    | 0   | 0     | 0   | 0 |
| 15D10060                    | 4.9 %    | 295.5 | 0        | 0.018 | 35       | 0.1869 | 0        | 1.493 | 3         | 0.000673 | 0         | 0.0000139 | 0         | 0.000264 | 0        | 0.00101 | 0        | 0.01138 | 0         | 0   | 0    | 0.43 | 0    | 0   | 0     | 0   | 0 |
| 15D10062                    | 5.2 %    | 295.5 | 0        | 0.018 | 35       | 0.1869 | 0        | 1.493 | 3         | 0.000673 | 0         | 0.0000139 | 0         | 0.000264 | 0        | 0.00101 | 0        | 0.01138 | 0         | 0   | 0    | 0.43 | 0    | 0   | 0     | 0   | 0 |
| 15D10063                    | 5.5 %    | 295.5 | 0        | 0.018 | 35       | 0.1869 | 0        | 1.493 | 3         | 0.000673 | 0         | 0.0000139 | 0         | 0.000264 | 0        | 0.00101 | 0        | 0.01138 | 0         | 0   | 0    | 0.43 | 0    | 0   | 0     | 0   | 0 |
| 15D10064                    | 5.8 %    | 295.5 | 0        | 0.018 | 35       | 0.1869 | 0        | 1.493 | 3         | 0.000673 | 0         | 0.0000139 | 0         | 0.000264 | 0        | 0.00101 | 0        | 0.01138 | 0         | 0   | 0    | 0.43 | 0    | 0   | 0     | 0   | 0 |
| 15D10066                    | 6.1 %    | 295.5 | 0        | 0.018 | 35       | 0.1869 | 0        | 1.493 | 3         | 0.000673 | 0         | 0.0000139 | 0         | 0.000264 | 0        | 0.00101 | 0        | 0.01138 | 0         | 0   | 0    | 0.43 | 0    | 0   | 0     | 0   | 0 |
| 15D10067                    | 6.5 %    | 295.5 | 0        | 0.018 | 35       | 0.1869 | 0        | 1.493 | 3         | 0.000673 | 0         | 0.0000139 | 0         | 0.000264 | 0        | 0.00101 | 0        | 0.01138 | 0         | 0   | 0    | 0.43 | 0    | 0   | 0     | 0   | 0 |
| 15D10068                    | 7.0 %    | 295.5 | 0        | 0.018 | 35       | 0.1869 | 0        | 1.493 | 3         | 0.000673 | 0         | 0.0000139 | 0         | 0.000264 | 0        | 0.00101 | 0        | 0.01138 | 0         | 0   | 0    | 0.43 | 0    | 0   | 0     | 0   | 0 |
| 15D10070                    | 7.6 %    | 295.5 | 0        | 0.018 | 35       | 0.1869 | 0        | 1.493 | 3         | 0.000673 | 0         | 0.0000139 | 0         | 0.000264 | 0        | 0.00101 | 0        | 0.01138 | 0         | 0   | 0    | 0.43 | 0    | 0   | 0     | 0   | 0 |
| 15D10071                    | 8.4 %    | 295.5 | 0        | 0.018 | 35       | 0.1869 | 0        | 1.493 | 3         | 0.000673 | 0         | 0.0000139 | 0         | 0.000264 | 0        | 0.00101 | 0        | 0.01138 | 0         | 0   | 0    | 0.43 | 0    | 0   | 0     | 0   | 0 |
| 15D10072                    | 9.4 %    | 295.5 | 0        | 0.018 | 35       | 0.1869 | 0        | 1.493 | 3         | 0.000673 | 0         | 0.0000139 | 0         | 0.000264 | 0        | 0.00101 | 0        | 0.01138 | 0         | 0   | 0    | 0.43 | 0    | 0   | 0     | 0   | 0 |
| 15D10074                    | 10.5 %   | 295.5 | 0        | 0.018 | 35       | 0.1869 | 0        | 1.493 | 3         | 0.000673 | 0         | 0.0000139 | 0         | 0.000264 | 0        | 0.00101 | 0        | 0.01138 | 0         | 0   | 0    | 0.43 | 0    | 0   | 0     | 0   | 0 |
| 15D10075                    | 11.7 %   | 295.5 | 0        | 0.018 | 35       | 0.1869 | 0        | 1.493 | 3         | 0.000673 | 0         | 0.0000139 | 0         | 0.000264 | 0        | 0.00101 | 0        | 0.01138 | 0         | 0   | 0    | 0.43 | 0    | 0   | 0     | 0   | 0 |
| 15D10076                    | 13.1 %   | 295.5 | 0        | 0.018 | 35       | 0.1869 | 0        | 1.493 | 3         | 0.000673 | 0         | 0.0000139 | 0         | 0.000264 | 0        | 0.00101 | 0        | 0.01138 | 0         | 0   | 0    | 0.43 | 0    | 0   | 0     | 0   | 0 |
| 15D10078                    | 14.7 %   | 295.5 | 0        | 0.018 | 35       | 0.1869 | 0        | 1.493 | 3         | 0.000673 | 0         | 0.0000139 | 0         | 0.000264 | 0        | 0.00101 | 0        | 0.01138 | 0         | 0   | 0    | 0.43 | 0    | 0   | 0     | 0   | 0 |
| 15D10079                    | 16.5 %   | 295.5 | 0        | 0.018 | 35       | 0.1869 | 0        | 1.493 | 3         | 0.000673 | 0         | 0.0000139 | 0         | 0.000264 | 0        | 0.00101 | 0        | 0.01138 | 0         | 0   | 0    | 0.43 | 0    | 0   | 0     | 0   | 0 |
| 15D10080                    | 18.5 %   | 295.5 | 0        | 0.018 | 35       | 0.1869 | 0        | 1.493 | 3         | 0.000673 | 0         | 0.0000139 | 0         | 0.000264 | 0        | 0.00101 | 0        | 0.01138 | 0         | 0   | 0    | 0.43 | 0    | 0   | 0     | 0   | 0 |
| 15D10082                    | 19.8 %   | 295.5 | 0        | 0.018 | 35       | 0.1869 | 0        | 1.493 | 3         | 0.000673 | 0         | 0.0000139 | 0         | 0.000264 | 0        | 0.00101 | 0        | 0.01138 | 0         | 0   | 0    | 0.43 | 0    | 0   | 0     | 0   | 0 |
| 15D10083                    | 21.7 %   | 295.5 | 0        | 0.018 | 35       | 0.1869 | 0        | 1.493 | 3         | 0.000673 | 0         | 0.0000139 | 0         | 0.000264 | 0        | 0.00101 | 0        | 0.01138 | 0         | 0   | 0    | 0.43 | 0    | 0   | 0     | 0   | 0 |
| 15D10084                    | 22.8 %   | 295.5 | 0        | 0.018 | 35       | 0.1869 | 0        | 1.493 | 3         | 0.000673 | 0         | 0.0000139 | 0         | 0.000264 | 0        | 0.00101 | 0        | 0.01138 | 0         | 0   | 0    | 0.43 | 0    | 0   | 0     | 0   | 0 |
| 15D10086                    | 24.3 %   | 295.5 | 0        | 0.018 | 35       | 0.1869 | 0        | 1.493 | 3         | 0.000673 | 0         | 0.0000139 | 0         | 0.000264 | 0        | 0.00101 | 0        | 0.01138 | 0         | 0   | 0    | 0.43 | 0    | 0   | 0     | 0   | 0 |



15D10045.AGE >>> 274-3 >>> KERGUELEN | FALLOON (14-PIL-01) PROJECT

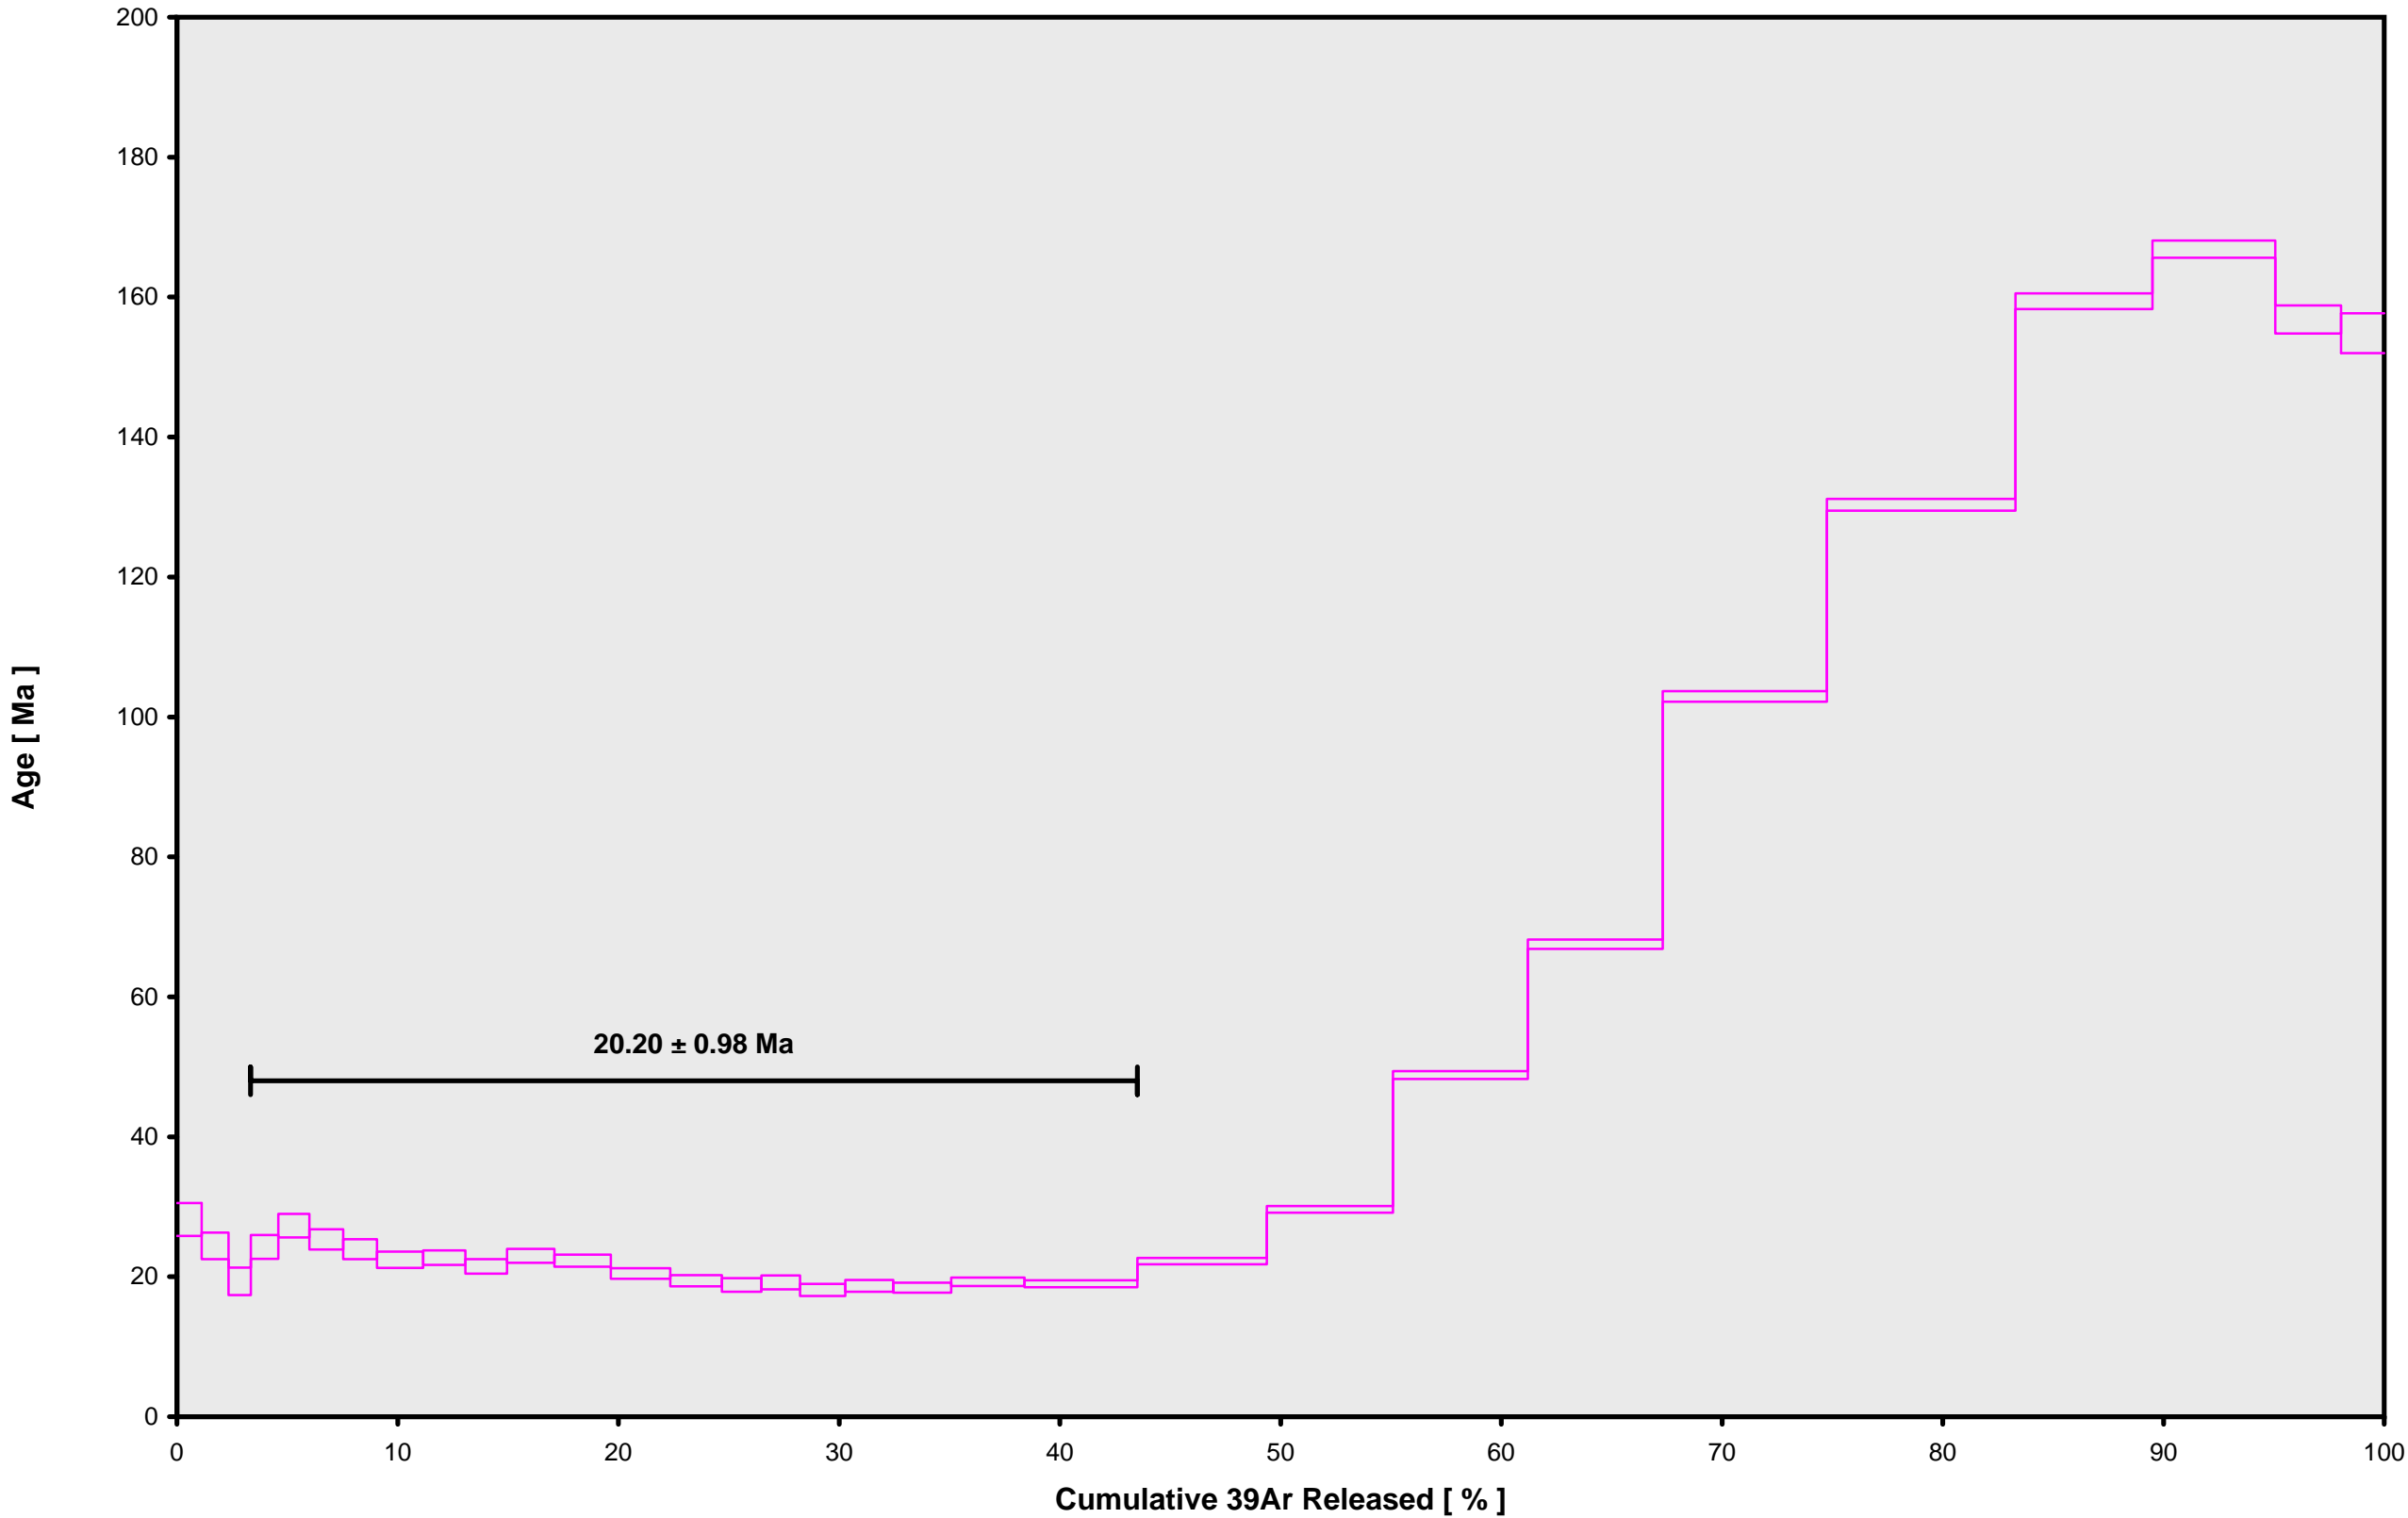

Ar-Ages in Ma

WEIGHTED PLATEAU

20.20 ± 0.98

TOTAL FUSION

65.80 ± 0.24

NORMAL ISOCHRON

15.02 ± 1.38

INVERSE ISOCHRON

14.99 ± 1.36

MSWD (PROBABILITY)

22.80 (0%)

Sample Info

Groundmass

Kerguelen Plateau

Dan Miggins

IRR = 14-OSU-07 (7B23-14)

J = 0.00177389 ± 0.00000206



15D10045.AGE >>> 274-3 >>> KERGUELEN | FALLOON (14-PIL-01) PROJECT

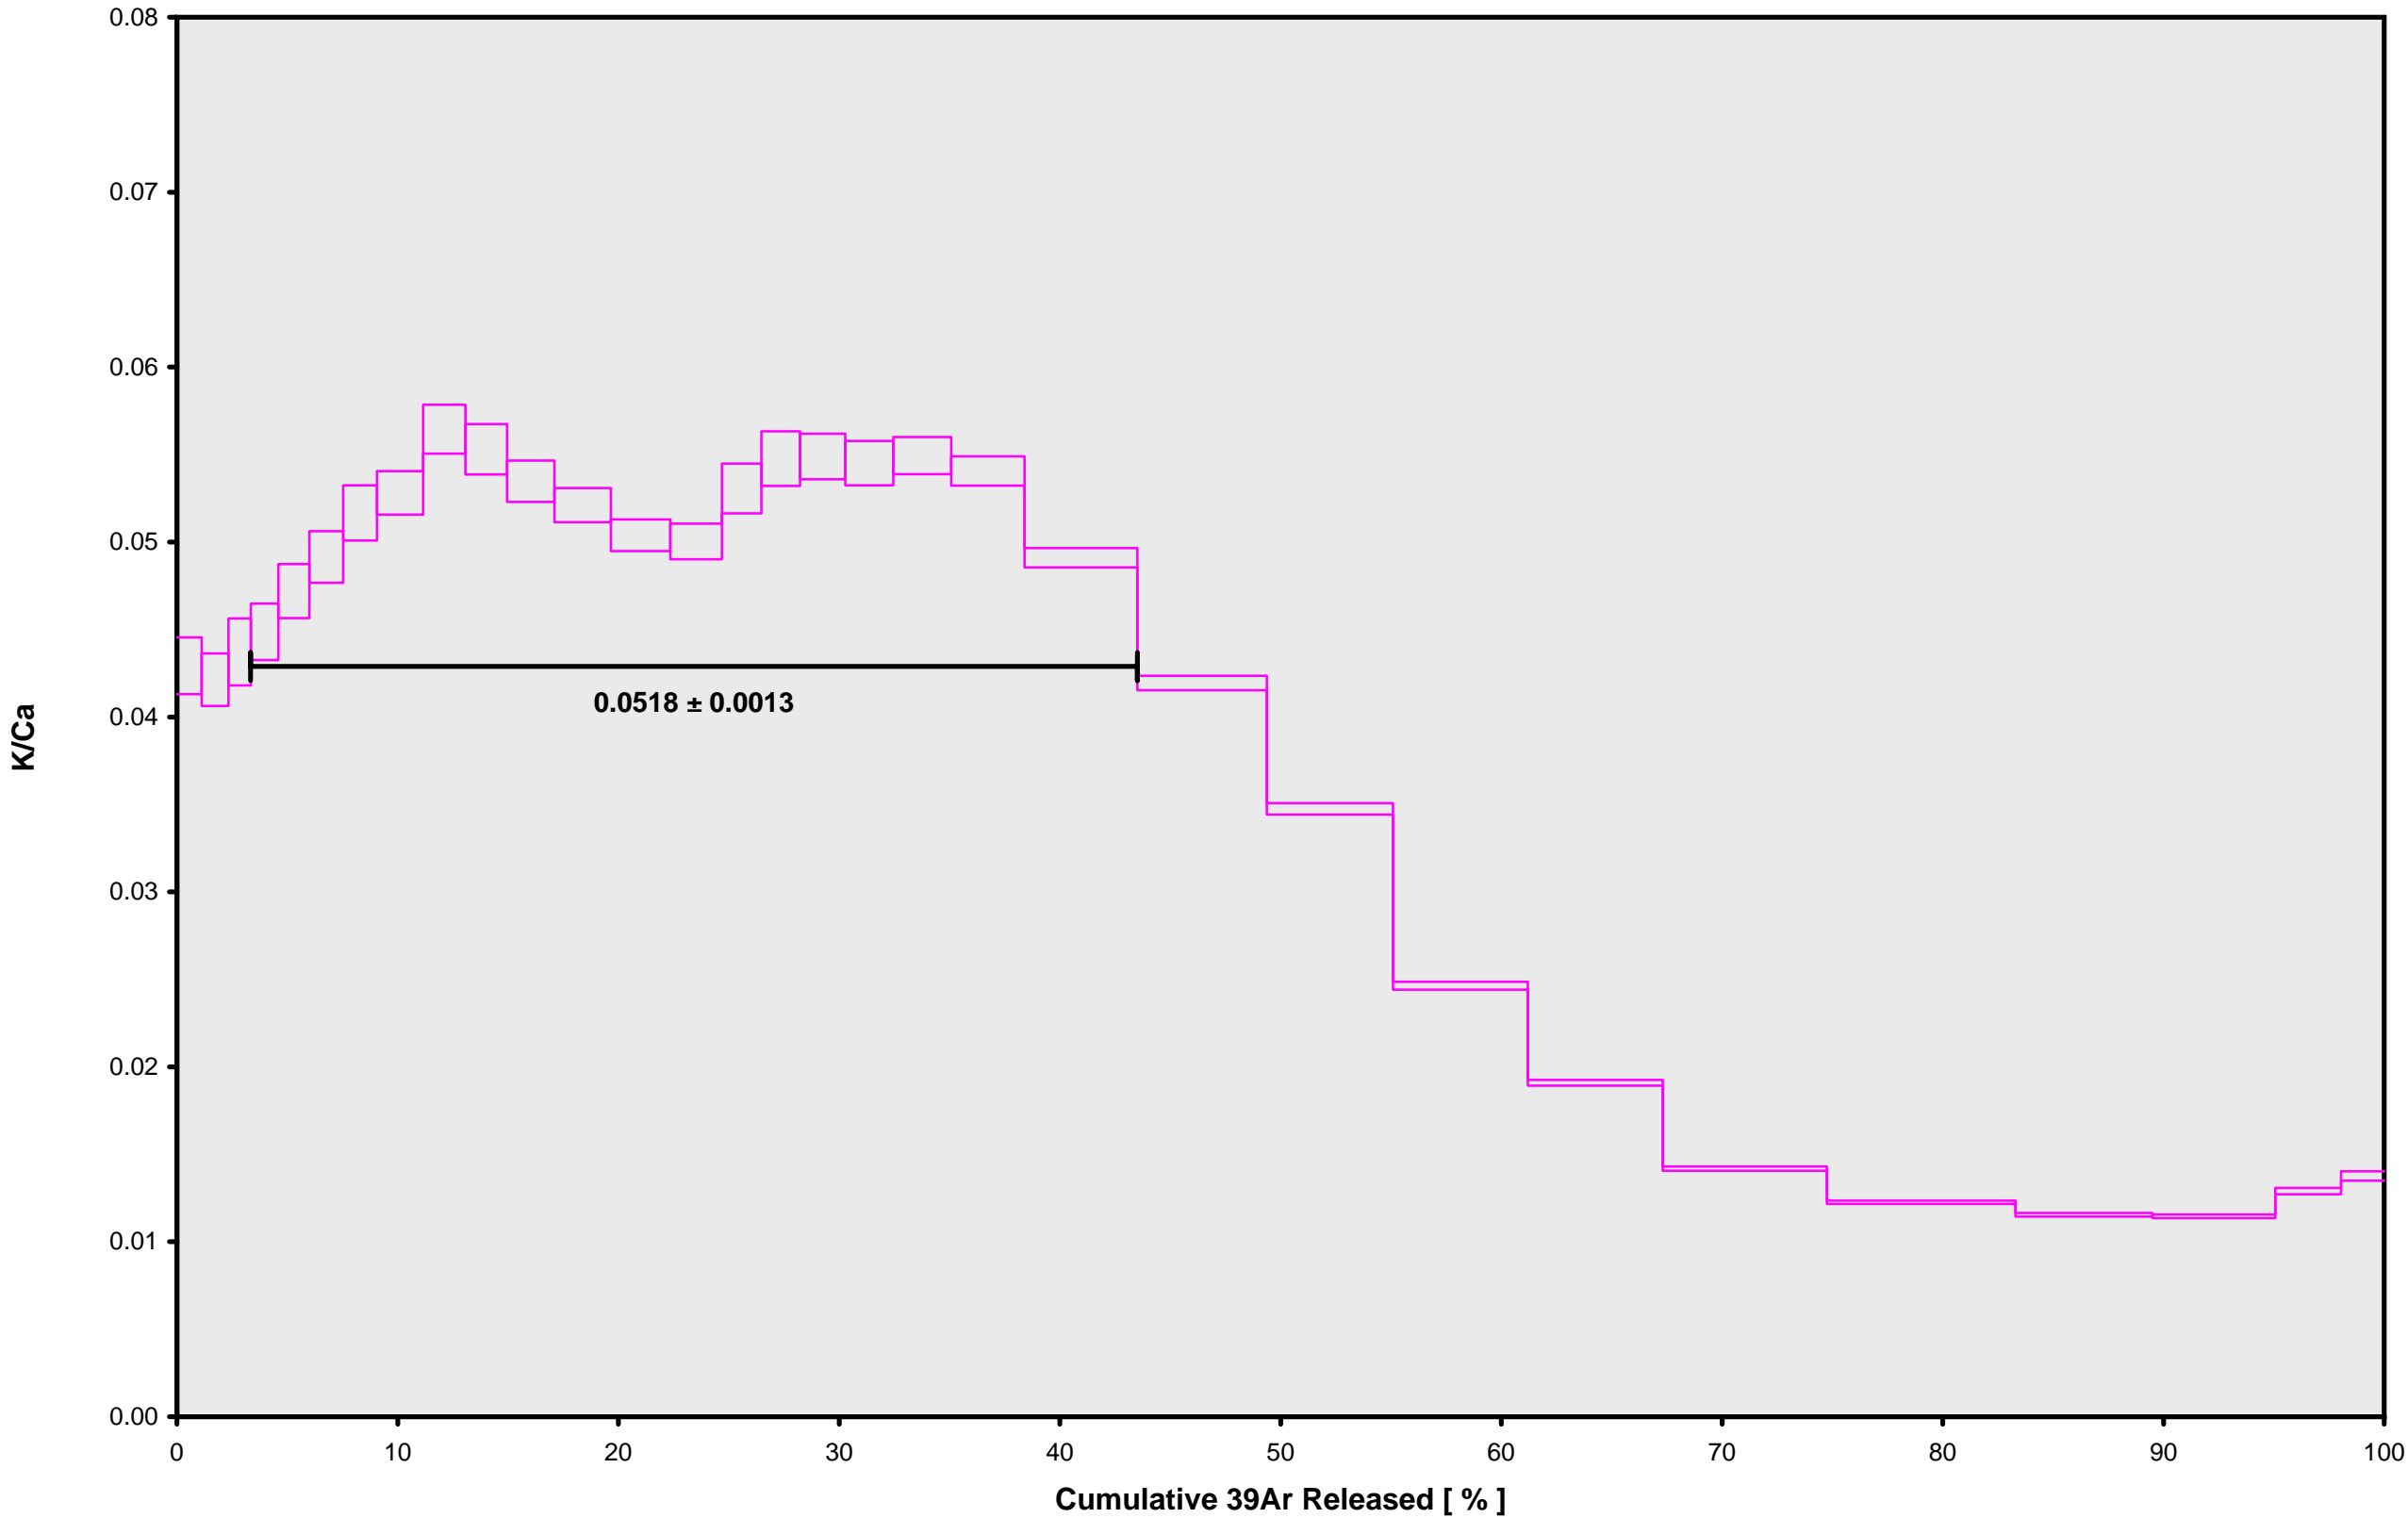

**Ar-Ages in Ma**

**WEIGHTED PLATEAU**

**20.20 ± 0.98**

**TOTAL FUSION**

**65.80 ± 0.24**

**NORMAL ISOCHRON**

**15.02 ± 1.38**

**INVERSE ISOCHRON**

**14.99 ± 1.36**

**Sample Info**

**Groundmass**

**Kerguelen Plateau**

**Dan Miggins**

**IRR = 14-OSU-07 (7B23-14)**

**J = 0.00177389 ± 0.00000206**



15D10045.AGE >>> 274-3 >>> KERGUELEN | FALLOON (14-PIL-01) PROJECT

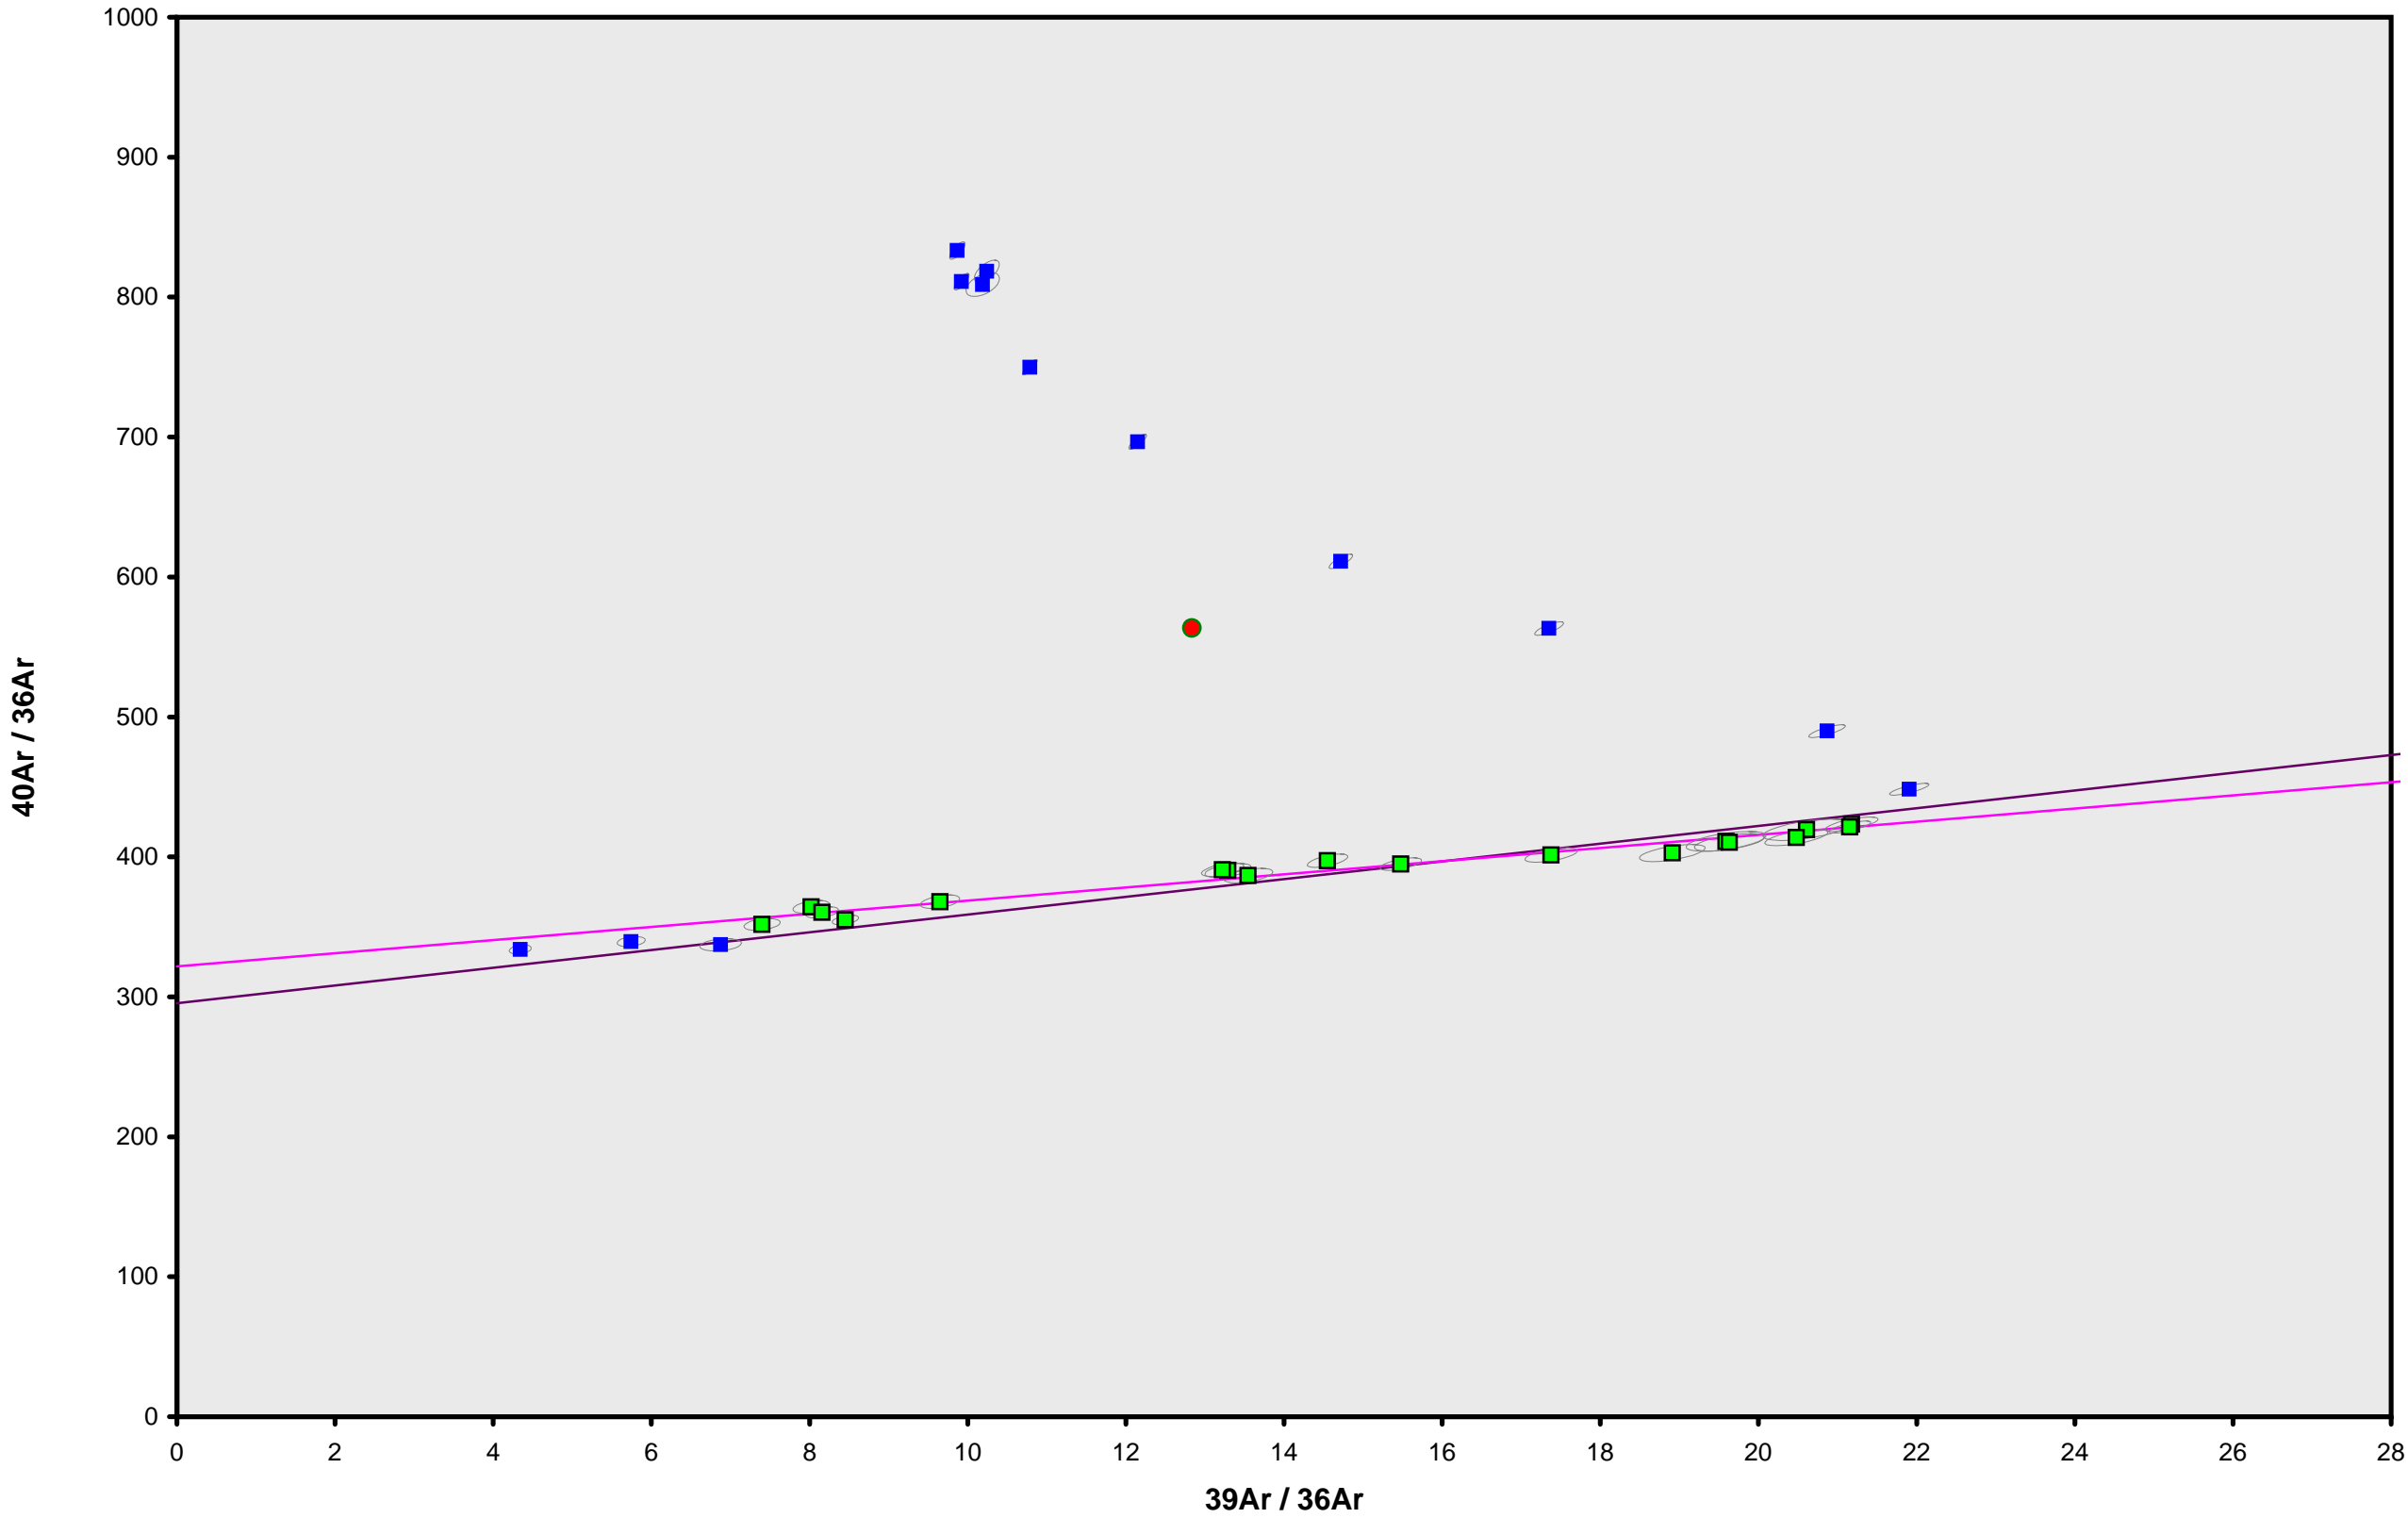

Ar-Ages in Ma

WEIGHTED PLATEAU

20.20 ± 0.98

TOTAL FUSION

65.80 ± 0.24

NORMAL ISOCHRON

15.02 ± 1.38

INVERSE ISOCHRON

14.99 ± 1.36

MSWD (PROBABILITY)

4.69 (0%)

40AR/36AR INTERCEPT

321.7 ± 6.6

Sample Info

Groundmass

Kerguelen Plateau

Dan Miggins

IRR = 14-OSU-07 (7B23-14)

J = 0.00177389 ± 0.00000206



15D10045.AGE >>> 274-3 >>> KERGUELEN | FALLOON (14-PIL-01) PROJECT

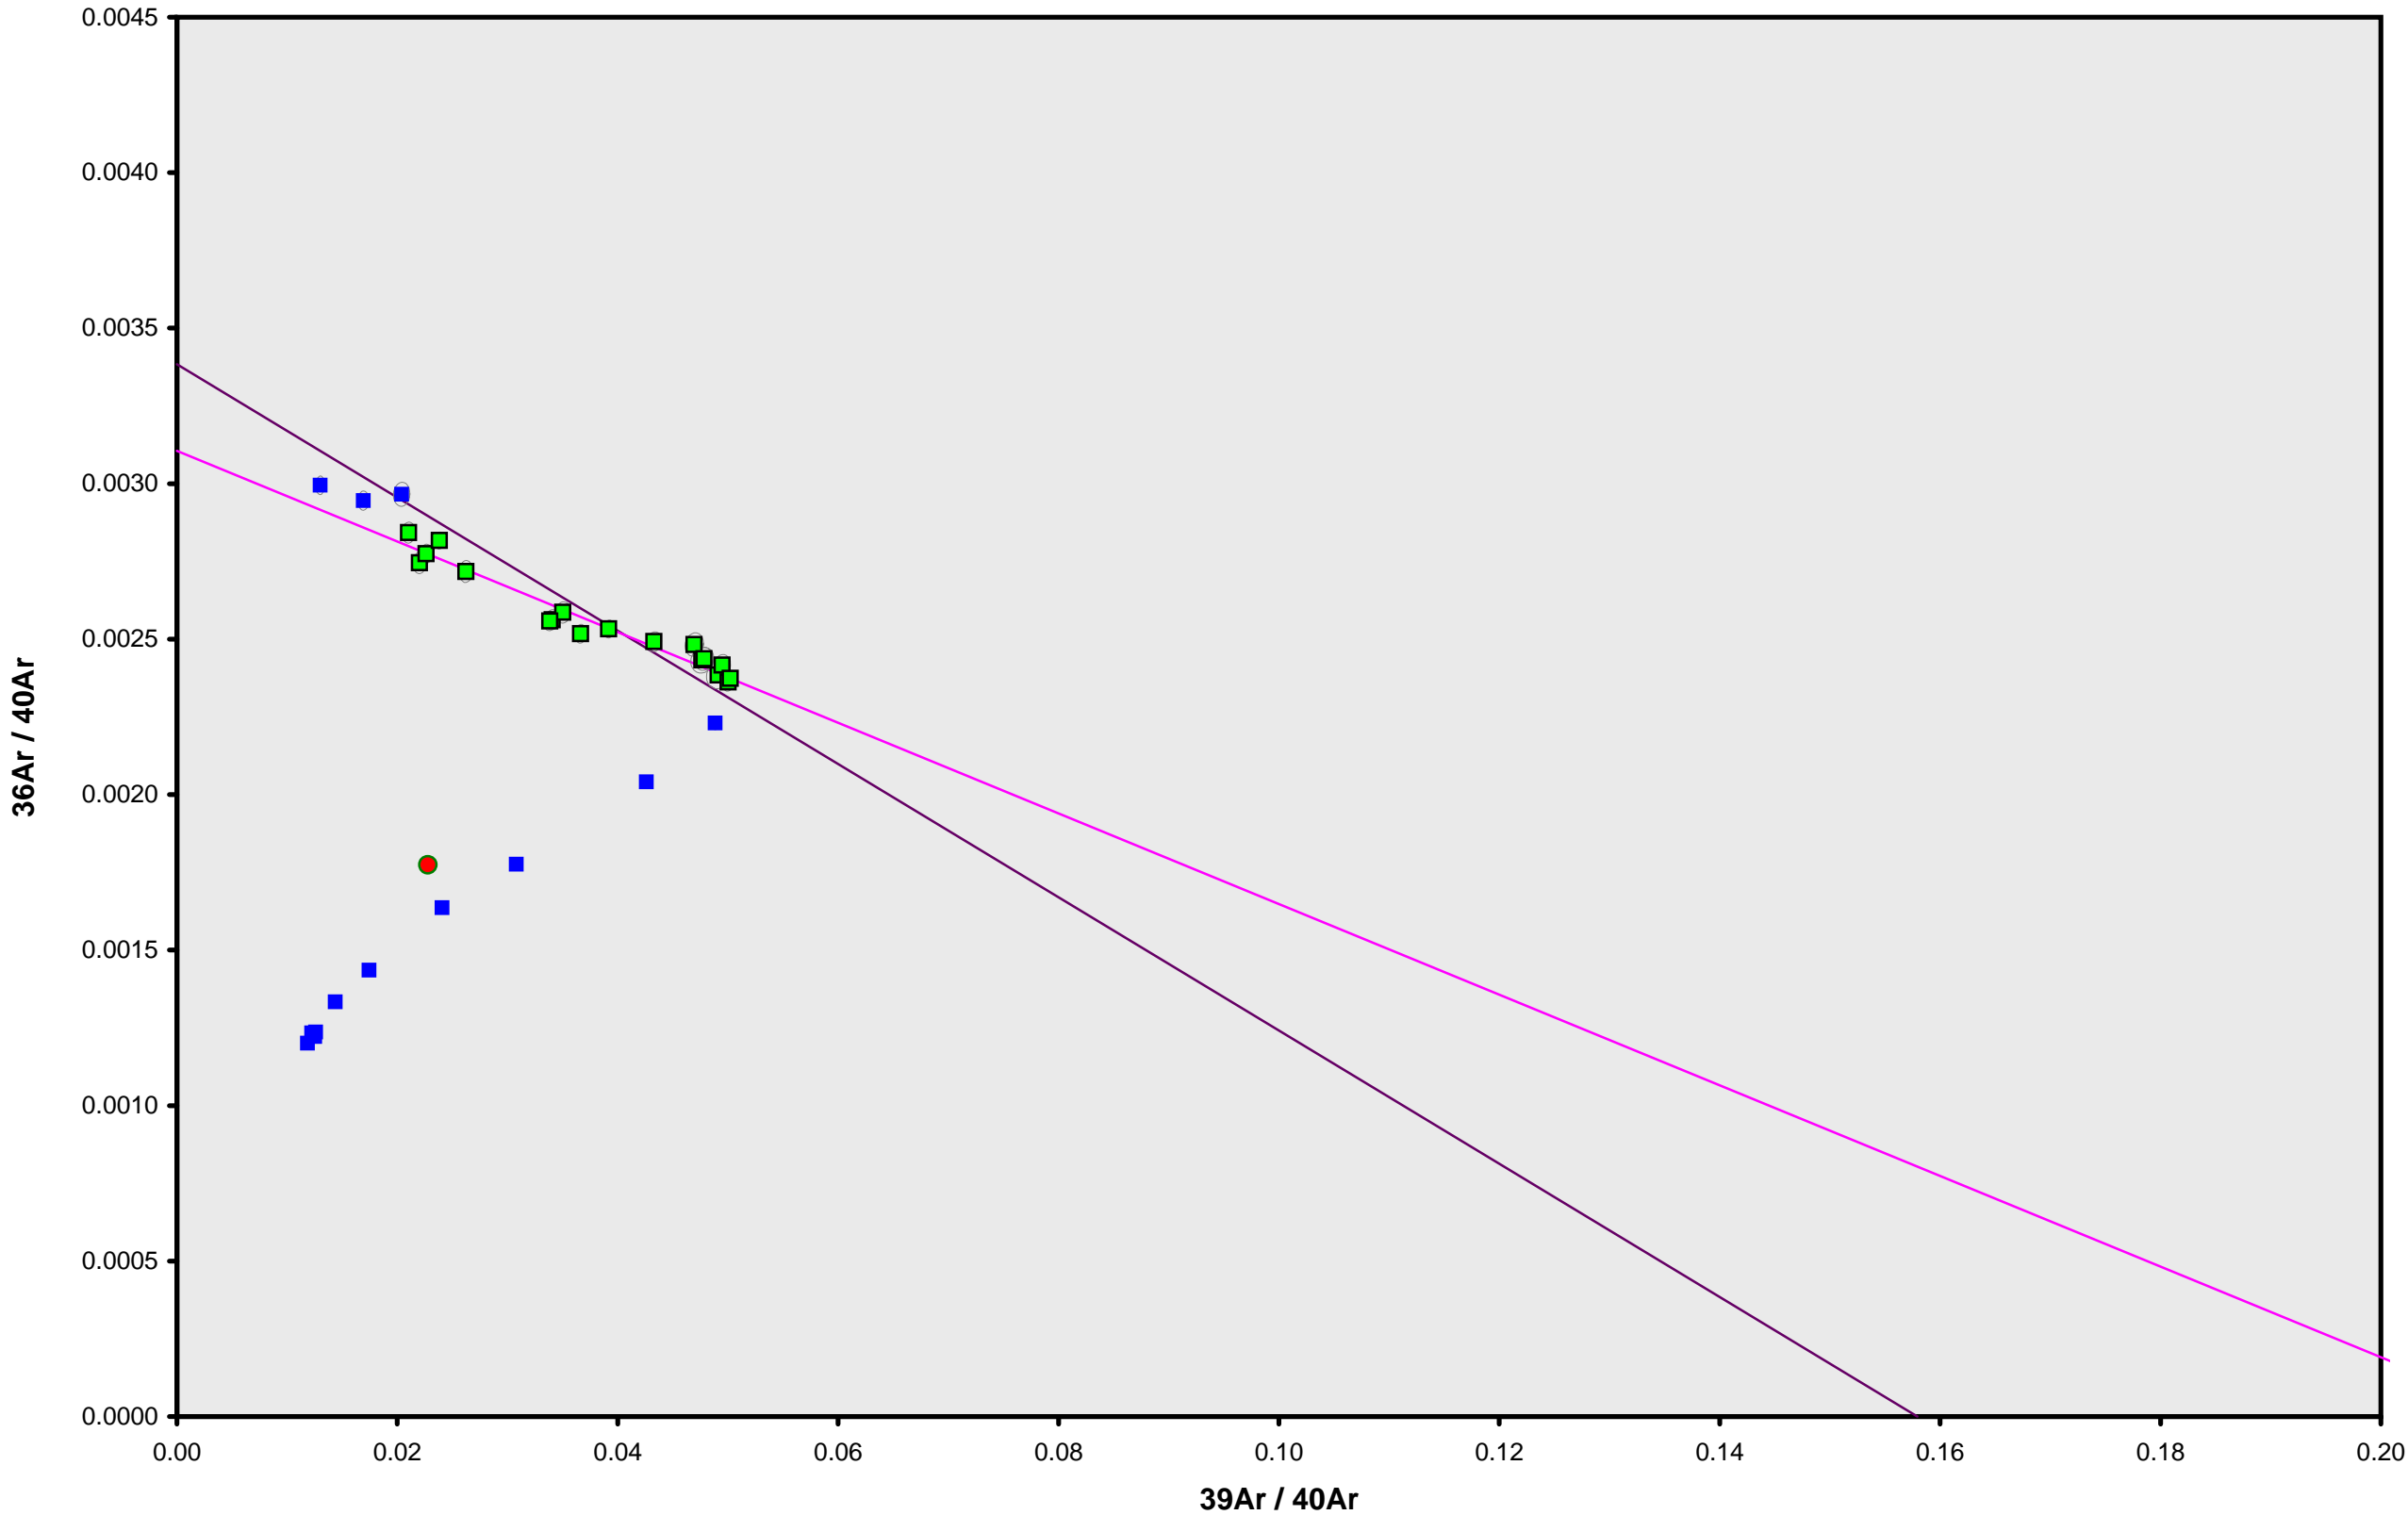

Ar-Ages in Ma

WEIGHTED PLATEAU

20.20 ± 0.98

TOTAL FUSION

65.80 ± 0.24

NORMAL ISOCHRON

15.02 ± 1.38

INVERSE ISOCHRON

14.99 ± 1.36

MSWD (PROBABILITY)

4.69 (0%)

SPREADING FACTOR

13.7%

40AR/36AR INTERCEPT

322.0 ± 6.6

Sample Info

Groundmass

Kerguelen Plateau

Dan Miggins

IRR = 14-OSU-07 (7B23-14)

J = 0.00177389 ± 0.00000206



| Incremental Heating |        | 36Ar(a)<br>[fA] | 37Ar(ca)<br>[fA] | 38Ar(cl)<br>[fA] | 39Ar(k)<br>[fA] | 40Ar(r)<br>[fA] | Age ± 2σ<br>(Ma) | 40Ar(r)<br>(%) | 39Ar(k)<br>(%) | K/Ca ± 2σ   |
|---------------------|--------|-----------------|------------------|------------------|-----------------|-----------------|------------------|----------------|----------------|-------------|
| 15D07375            | 1.9 %  | 0.569381        | 4.5687           | 0.0148227        | 27.8628         | 23.1999         | 2.71 ± 0.18      | 12.12          | 0.49           | 2.62 ± 0.17 |
| 15D07376            | 2.0 %  | 0.539215        | 5.2802           | 0.0447638        | 30.6859         | 25.2081         | 2.67 ± 0.16      | 13.66          | 0.54           | 2.50 ± 0.15 |
| 15D07378            | 2.1 %  | 0.468473        | 5.1810           | 0.0814797        | 29.0585         | 24.5203         | 2.74 ± 0.15      | 15.04          | 0.51           | 2.41 ± 0.15 |
| 15D07379            | 2.2 %  | 0.450192        | 5.2817           | 0.0000000        | 30.5740         | 23.5451         | 2.50 ± 0.14      | 15.03          | 0.54           | 2.49 ± 0.15 |
| 15D07380            | 2.3 %  | 0.371790        | 4.6316           | 0.0072745        | 27.3748         | 22.0316         | 2.62 ± 0.13      | 16.70          | 0.48           | 2.54 ± 0.17 |
| 15D07382            | 2.4 %  | 0.402416        | 6.1183           | 0.0570307        | 33.1492         | 27.2168         | 2.67 ± 0.12      | 18.62          | 0.59           | 2.33 ± 0.12 |
| 15D07383            | 2.5 %  | 0.370152        | 5.9634           | 0.0169925        | 32.7222         | 25.1339         | 2.50 ± 0.11      | 18.68          | 0.58           | 2.36 ± 0.12 |
| 15D07384            | 2.6 %  | 0.367599        | 6.3452           | 0.0000000        | 35.2766         | 27.0414         | 2.49 ± 0.11      | 19.93          | 0.62           | 2.39 ± 0.12 |
| 15D07387            | 2.7 %  | ✓ 0.334428      | 5.8717           | 0.0463042        | 33.0670         | 26.5359         | 2.61 ± 0.10      | 21.16          | 0.58           | 2.42 ± 0.13 |
| 15D07388            | 2.8 %  | ✓ 0.329237      | 6.8328           | 0.0250239        | 37.7420         | 30.1673         | 2.60 ± 0.09      | 23.66          | 0.67           | 2.38 ± 0.12 |
| 15D07389            | 2.9 %  | ✓ 0.278164      | 6.4645           | 0.0000000        | 35.6093         | 28.6204         | 2.61 ± 0.09      | 25.82          | 0.63           | 2.37 ± 0.11 |
| 15D07391            | 3.0 %  | ✓ 0.283758      | 7.4424           | 0.1067426        | 40.7316         | 32.4408         | 2.59 ± 0.08      | 27.89          | 0.72           | 2.35 ± 0.10 |
| 15D07392            | 3.2 %  | ✓ 0.268579      | 7.8320           | 0.0275272        | 43.6424         | 34.5772         | 2.58 ± 0.08      | 30.33          | 0.77           | 2.40 ± 0.11 |
| 15D07393            | 3.4 %  | ✓ 0.251439      | 7.9783           | 0.0124581        | 44.6272         | 35.3232         | 2.57 ± 0.06      | 32.21          | 0.79           | 2.41 ± 0.10 |
| 15D07395            | 3.6 %  | ✓ 0.282284      | 10.2648          | 0.0000000        | 57.7583         | 45.8432         | 2.58 ± 0.06      | 35.45          | 1.02           | 2.42 ± 0.08 |
| 15D07396            | 3.8 %  | ✓ 0.211927      | 8.6375           | 0.0278678        | 49.9721         | 39.7615         | 2.59 ± 0.06      | 38.82          | 0.88           | 2.49 ± 0.09 |
| 15D07397            | 4.0 %  | ✓ 0.161004      | 6.5731           | 0.0236674        | 39.2430         | 31.2686         | 2.59 ± 0.06      | 39.64          | 0.69           | 2.57 ± 0.12 |
| 15D07399            | 4.3 %  | ✓ 0.165854      | 8.1720           | 0.0241834        | 48.3735         | 39.1819         | 2.63 ± 0.05      | 44.40          | 0.85           | 2.55 ± 0.10 |
| 15D07400            | 4.6 %  | ✓ 0.324624      | 17.7789          | 0.0253270        | 103.4171        | 83.3173         | 2.62 ± 0.04      | 46.46          | 1.83           | 2.50 ± 0.05 |
| 15D07401            | 4.9 %  | ✓ 0.178900      | 13.7479          | 0.0885415        | 84.0349         | 67.4478         | 2.61 ± 0.03      | 56.02          | 1.49           | 2.63 ± 0.06 |
| 15D07403            | 5.2 %  | ✓ 0.246644      | 20.5462          | 0.0505887        | 122.7648        | 99.1911         | 2.63 ± 0.02      | 57.60          | 2.17           | 2.57 ± 0.04 |
| 15D07404            | 5.5 %  | ✓ 0.184677      | 25.1976          | 0.0878700        | 152.3184        | 122.7756        | 2.62 ± 0.02      | 69.17          | 2.69           | 2.60 ± 0.04 |
| 15D07405            | 5.8 %  | ✓ 0.094751      | 15.1159          | 0.0380311        | 100.2535        | 80.3807         | 2.61 ± 0.02      | 74.10          | 1.77           | 2.85 ± 0.06 |
| 15D07407            | 6.1 %  | ✓ 0.238205      | 27.9126          | 0.1062896        | 170.4594        | 137.1230        | 2.62 ± 0.02      | 66.02          | 3.01           | 2.63 ± 0.03 |
| 15D07408            | 6.5 %  | ✓ 0.189764      | 39.6332          | 0.1888074        | 242.9967        | 194.6459        | 2.61 ± 0.01      | 77.56          | 4.29           | 2.64 ± 0.03 |
| 15D07409            | 7.0 %  | ✓ 0.143649      | 32.3451          | 0.1737817        | 200.7361        | 159.6273        | 2.59 ± 0.01      | 78.91          | 3.55           | 2.67 ± 0.03 |
| 15D07411            | 7.6 %  | ✓ 0.149094      | 34.5698          | 0.1408306        | 214.6134        | 171.4902        | 2.60 ± 0.01      | 79.48          | 3.79           | 2.67 ± 0.03 |
| 15D07412            | 8.4 %  | ✓ 0.205393      | 47.4235          | 0.2041188        | 292.7306        | 233.7374        | 2.60 ± 0.01      | 79.31          | 5.17           | 2.65 ± 0.02 |
| 15D07413            | 9.4 %  | ✓ 0.333961      | 60.5693          | 0.2932286        | 356.6742        | 282.8843        | 2.58 ± 0.01      | 74.07          | 6.30           | 2.53 ± 0.02 |
| 15D07415            | 10.5 % | ✓ 0.402556      | 62.0557          | 0.2675293        | 334.3119        | 266.3670        | 2.59 ± 0.01      | 69.07          | 5.91           | 2.32 ± 0.02 |
| 15D07416            | 11.7 % | ✓ 0.455986      | 61.5533          | 0.1864417        | 288.5370        | 228.0323        | 2.57 ± 0.02      | 62.81          | 5.10           | 2.02 ± 0.02 |
| 15D07417            | 13.1 % | ✓ 0.973037      | 108.2218         | 0.3444377        | 386.3902        | 304.7296        | 2.56 ± 0.02      | 51.42          | 6.83           | 1.54 ± 0.01 |
| 15D07419            | 14.7 % | ✓ 1.484601      | 173.2133         | 0.5090766        | 434.0633        | 345.9032        | 2.59 ± 0.03      | 44.06          | 7.67           | 1.08 ± 0.01 |
| 15D07420            | 16.5 % | ✓ 1.907194      | 271.2484         | 0.4921575        | 474.2355        | 374.5252        | 2.57 ± 0.03      | 39.90          | 8.38           | 0.75 ± 0.00 |
| 15D07421            | 17.7 % | ✓ 1.440368      | 187.6240         | 0.2713431        | 323.1370        | 257.8432        | 2.60 ± 0.03      | 37.71          | 5.71           | 0.74 ± 0.00 |
| 15D07423            | 18.5 % | 1.042415        | 100.2624         | 0.1989469        | 211.6648        | 165.6618        | 2.55 ± 0.04      | 34.96          | 3.74           | 0.91 ± 0.01 |
| 15D07424            | 19.5 % | 0.752648        | 67.5539          | 0.0825564        | 143.3196        | 111.9611        | 2.54 ± 0.04      | 33.47          | 2.53           | 0.91 ± 0.01 |
| 15D07425            | 20.5 % | 0.598762        | 61.0807          | 0.0759276        | 116.1329        | 91.2665         | 2.56 ± 0.05      | 34.01          | 2.05           | 0.82 ± 0.01 |
| 15D07427            | 21.7 % | 0.574982        | 76.0364          | 0.1060436        | 117.0730        | 91.0798         | 2.53 ± 0.04      | 34.88          | 2.07           | 0.66 ± 0.01 |
| 15D07428            | 22.8 % | 0.533952        | 79.4419          | 0.1046388        | 111.3177        | 88.9424         | 2.60 ± 0.05      | 36.03          | 1.97           | 0.60 ± 0.00 |

|   |           |           |           |           |           |  |  |  |  |  |
|---|-----------|-----------|-----------|-----------|-----------|--|--|--|--|--|
| Σ | 18.562053 | 1702.5708 | 4.5526523 | 5658.6523 | 4500.5498 |  |  |  |  |  |
|---|-----------|-----------|-----------|-----------|-----------|--|--|--|--|--|

| Information on Analysis                                                                                                                                                                                                                                                        | Results                   | 40(r)/39(k) ± 2σ          | Age ± 2σ<br>(Ma)                                      | MSWD           | 39Ar(k)<br>(%,n)                           | K/Ca ± 2σ   |
|--------------------------------------------------------------------------------------------------------------------------------------------------------------------------------------------------------------------------------------------------------------------------------|---------------------------|---------------------------|-------------------------------------------------------|----------------|--------------------------------------------|-------------|
| Sample = 1180050-1A<br>Material = Groundmass<br>Location = Kerguelen Plateau<br>Analyst = Dan Miggins<br>Project = KERGUELEN   FALLOON (14-<br>Mass Discrimination Law = LIN<br>Irradiation = 14-OSU-07 (7B19-14)<br>J = 0.00179979 ± 0.00000211<br>FCT-NM = 28.201 ± 0.023 Ma | Age Plateau<br>Error Mean | 0.79774 ± 0.00187 ± 0.23% | 2.59 ± 0.01 ± 0.33%                                   | 2.67<br>0%     | 83.28<br>27                                | 1.07 ± 0.23 |
|                                                                                                                                                                                                                                                                                |                           |                           | Full External Error ± 0.06<br>Analytical Error ± 0.01 | 1.55<br>1.6328 | 2σ Confidence Limit<br>Error Magnification |             |
|                                                                                                                                                                                                                                                                                | Total Fusion Age          | 0.79534 ± 0.00174 ± 0.22% | 2.59 ± 0.01 ± 0.32%                                   |                | 40                                         | 1.43 ± 0.00 |
|                                                                                                                                                                                                                                                                                |                           |                           | Full External Error ± 0.06<br>Analytical Error ± 0.01 |                |                                            |             |



| Normal Isochron |        | 39(k)/36(a) ± 2σ |                 | 40(a+r)/36(a) ± 2σ | r.i.   |
|-----------------|--------|------------------|-----------------|--------------------|--------|
| 15D07375        | 1.9 %  |                  | 48.94 ± 0.47    | 336.25 ± 3.11      | 0.9440 |
| 15D07376        | 2.0 %  |                  | 56.91 ± 0.56    | 342.25 ± 3.23      | 0.9489 |
| 15D07378        | 2.1 %  |                  | 62.03 ± 0.62    | 347.84 ± 3.34      | 0.9457 |
| 15D07379        | 2.2 %  |                  | 67.91 ± 0.67    | 347.80 ± 3.31      | 0.9475 |
| 15D07380        | 2.3 %  |                  | 73.63 ± 0.74    | 354.76 ± 3.45      | 0.9415 |
| 15D07382        | 2.4 %  |                  | 82.38 ± 0.87    | 363.13 ± 3.74      | 0.9555 |
| 15D07383        | 2.5 %  |                  | 88.40 ± 0.94    | 363.40 ± 3.79      | 0.9553 |
| 15D07384        | 2.6 %  |                  | 95.97 ± 1.10    | 369.06 ± 4.17      | 0.9662 |
| 15D07387        | 2.7 %  | ✓                | 98.88 ± 1.07    | 374.85 ± 4.00      | 0.9582 |
| 15D07388        | 2.8 %  | ✓                | 114.63 ± 1.26   | 387.13 ± 4.19      | 0.9637 |
| 15D07389        | 2.9 %  | ✓                | 128.02 ± 1.53   | 398.39 ± 4.71      | 0.9647 |
| 15D07391        | 3.0 %  | ✓                | 143.54 ± 1.68   | 409.83 ± 4.75      | 0.9680 |
| 15D07392        | 3.2 %  | ✓                | 162.49 ± 2.10   | 424.24 ± 5.45      | 0.9738 |
| 15D07393        | 3.4 %  | ✓                | 177.49 ± 2.10   | 435.98 ± 5.12      | 0.9692 |
| 15D07395        | 3.6 %  | ✓                | 204.61 ± 2.37   | 457.90 ± 5.27      | 0.9749 |
| 15D07396        | 3.8 %  | ✓                | 235.80 ± 3.21   | 483.12 ± 6.58      | 0.9767 |
| 15D07397        | 4.0 %  | ✓                | 243.74 ± 3.69   | 489.71 ± 7.41      | 0.9712 |
| 15D07399        | 4.3 %  | ✓                | 291.66 ± 4.30   | 531.74 ± 7.85      | 0.9760 |
| 15D07400        | 4.6 %  | ✓                | 318.57 ± 3.71   | 552.16 ± 6.39      | 0.9844 |
| 15D07401        | 4.9 %  | ✓                | 469.73 ± 6.88   | 672.52 ± 9.85      | 0.9859 |
| 15D07403        | 5.2 %  | ✓                | 497.74 ± 5.80   | 697.66 ± 8.10      | 0.9850 |
| 15D07404        | 5.5 %  | ✓                | 824.78 ± 11.48  | 960.31 ± 13.32     | 0.9899 |
| 15D07405        | 5.8 %  | ✓                | 1058.07 ± 21.60 | 1143.83 ± 23.37    | 0.9922 |
| 15D07407        | 6.1 %  | ✓                | 715.60 ± 8.97   | 871.15 ± 10.87     | 0.9889 |
| 15D07408        | 6.5 %  | ✓                | 1280.52 ± 18.32 | 1321.23 ± 18.83    | 0.9926 |
| 15D07409        | 7.0 %  | ✓                | 1397.41 ± 23.39 | 1406.73 ± 23.50    | 0.9938 |
| 15D07411        | 7.6 %  | ✓                | 1439.45 ± 22.19 | 1445.72 ± 22.23    | 0.9931 |
| 15D07412        | 8.4 %  | ✓                | 1425.22 ± 19.71 | 1433.50 ± 19.74    | 0.9927 |
| 15D07413        | 9.4 %  | ✓                | 1068.01 ± 11.27 | 1142.56 ± 11.95    | 0.9883 |
| 15D07415        | 10.5 % | ✓                | 830.47 ± 8.47   | 957.19 ± 9.68      | 0.9874 |
| 15D07416        | 11.7 % | ✓                | 632.78 ± 6.03   | 795.59 ± 7.50      | 0.9852 |
| 15D07417        | 13.1 % | ✓                | 397.10 ± 3.31   | 608.67 ± 4.99      | 0.9826 |
| 15D07419        | 14.7 % | ✓                | 292.38 ± 2.28   | 528.49 ± 4.04      | 0.9808 |
| 15D07420        | 16.5 % | ✓                | 248.66 ± 1.83   | 491.88 ± 3.55      | 0.9786 |
| 15D07421        | 17.7 % | ✓                | 224.34 ± 1.71   | 474.51 ± 3.54      | 0.9792 |
| 15D07423        | 18.5 % |                  | 203.05 ± 1.66   | 454.42 ± 3.64      | 0.9800 |
| 15D07424        | 19.5 % |                  | 190.42 ± 1.66   | 444.26 ± 3.83      | 0.9797 |
| 15D07425        | 20.5 % |                  | 193.96 ± 1.80   | 447.93 ± 4.11      | 0.9798 |
| 15D07427        | 21.7 % |                  | 203.61 ± 1.87   | 453.90 ± 4.12      | 0.9795 |
| 15D07428        | 22.8 % |                  | 208.48 ± 2.04   | 462.07 ± 4.48      | 0.9804 |

| Results         | 40(a)/36(a) ± 2σ      | 40(r)/39(k) ± 2σ  | Age ± 2σ (Ma)              | MSWD            |
|-----------------|-----------------------|-------------------|----------------------------|-----------------|
| Normal Isochron | 295.09 ± 1.70         | 0.79818 ± 0.00299 | 2.60 ± 0.01                | 2.74            |
| Error Chron     | ± 0.58%               | ± 0.37%           | ± 0.44%                    | 0%              |
|                 |                       |                   | Full External Error ± 0.06 |                 |
|                 |                       |                   | Analytical Error ± 0.01    |                 |
| Statistics      | 2σ Confidence Limit   | 1.57              | Convergence                | 0.000007472144  |
|                 | Error Magnification   | 1.6556            | Number of Iterations       | 18              |
|                 | Number of Data Points | 27                | Calculated Line            | Weighted York-2 |



| Inverse Isochron |          | 39(k)/40(a+r) ± 2σ    |  | 36(a)/40(a+r) ± 2σ      | r.i.   |
|------------------|----------|-----------------------|--|-------------------------|--------|
| 15D07375         | 1.9 %    | 0.1455340 ± 0.0004635 |  | 0.00297401 ± 0.00002747 | 0.0420 |
| 15D07376         | 2.0 %    | 0.1662778 ± 0.0005144 |  | 0.00292184 ± 0.00002757 | 0.0466 |
| 15D07378         | 2.1 %    | 0.1783231 ± 0.0005787 |  | 0.00287488 ± 0.00002762 | 0.0549 |
| 15D07379         | 2.2 %    | 0.1952653 ± 0.0006152 |  | 0.00287521 ± 0.00002735 | 0.0612 |
| 15D07380         | 2.3 %    | 0.2075493 ± 0.0007044 |  | 0.00281882 ± 0.00002739 | 0.0776 |
| 15D07382         | 2.4 %    | 0.2268463 ± 0.0007087 |  | 0.00275381 ± 0.00002837 | 0.0643 |
| 15D07383         | 2.5 %    | 0.2432627 ± 0.0007697 |  | 0.00275178 ± 0.00002869 | 0.0733 |
| 15D07384         | 2.6 %    | 0.2600240 ± 0.0007718 |  | 0.00270957 ± 0.00003063 | 0.0693 |
| 15D07387         | 2.7 % ✓  | 0.2637780 ± 0.0008233 |  | 0.00266775 ± 0.00002849 | 0.0857 |
| 15D07388         | 2.8 % ✓  | 0.2961161 ± 0.0008714 |  | 0.00258313 ± 0.00002799 | 0.0847 |
| 15D07389         | 2.9 % ✓  | 0.3213317 ± 0.0010161 |  | 0.00251010 ± 0.00002967 | 0.0937 |
| 15D07391         | 3.0 % ✓  | 0.3502552 ± 0.0010323 |  | 0.00244006 ± 0.00002828 | 0.0958 |
| 15D07392         | 3.2 % ✓  | 0.3830223 ± 0.0011297 |  | 0.00235715 ± 0.00003026 | 0.0918 |
| 15D07393         | 3.4 % ✓  | 0.4070958 ± 0.0011905 |  | 0.00229366 ± 0.00002696 | 0.1052 |
| 15D07395         | 3.6 % ✓  | 0.4468443 ± 0.0011555 |  | 0.00218388 ± 0.00002514 | 0.0868 |
| 15D07396         | 3.8 % ✓  | 0.4880748 ± 0.0014364 |  | 0.00206988 ± 0.00002818 | 0.1029 |
| 15D07397         | 4.0 % ✓  | 0.4977216 ± 0.0018079 |  | 0.00204202 ± 0.00003092 | 0.1262 |
| 15D07399         | 4.3 % ✓  | 0.5485029 ± 0.0017716 |  | 0.00188061 ± 0.00002775 | 0.1169 |
| 15D07400         | 4.6 % ✓  | 0.5769636 ± 0.0011846 |  | 0.00181108 ± 0.00002098 | 0.0592 |
| 15D07401         | 4.9 % ✓  | 0.6984713 ± 0.0017164 |  | 0.00148696 ± 0.00002179 | 0.0851 |
| 15D07403         | 5.2 % ✓  | 0.7134401 ± 0.0014398 |  | 0.00143336 ± 0.00001664 | 0.0626 |
| 15D07404         | 5.5 % ✓  | 0.8588688 ± 0.0016931 |  | 0.00104133 ± 0.00001445 | 0.0517 |
| 15D07405         | 5.8 % ✓  | 0.9250205 ± 0.0023618 |  | 0.00087425 ± 0.00001786 | 0.0707 |
| 15D07407         | 6.1 % ✓  | 0.8214421 ± 0.0015313 |  | 0.00114791 ± 0.00001432 | 0.0456 |
| 15D07408         | 6.5 % ✓  | 0.9691910 ± 0.0016842 |  | 0.00075687 ± 0.00001078 | 0.0296 |
| 15D07409         | 7.0 % ✓  | 0.9933717 ± 0.0018485 |  | 0.00071087 ± 0.00001187 | 0.0367 |
| 15D07411         | 7.6 % ✓  | 0.9956666 ± 0.0018077 |  | 0.00069170 ± 0.00001063 | 0.0342 |
| 15D07412         | 8.4 % ✓  | 0.9942251 ± 0.0016603 |  | 0.00069759 ± 0.00000960 | 0.0232 |
| 15D07413         | 9.4 % ✓  | 0.9347546 ± 0.0015019 |  | 0.00087523 ± 0.00000916 | 0.0201 |
| 15D07415         | 10.5 % ✓ | 0.8676165 ± 0.0014012 |  | 0.00104472 ± 0.00001056 | 0.0214 |
| 15D07416         | 11.7 % ✓ | 0.7953577 ± 0.0012985 |  | 0.00125694 ± 0.00001185 | 0.0246 |
| 15D07417         | 13.1 % ✓ | 0.6523974 ± 0.0010083 |  | 0.00164292 ± 0.00001347 | 0.0127 |
| 15D07419         | 14.7 % ✓ | 0.5532268 ± 0.0008408 |  | 0.00189217 ± 0.00001448 | 0.0081 |
| 15D07420         | 16.5 % ✓ | 0.5055272 ± 0.0007655 |  | 0.00203304 ± 0.00001466 | 0.0072 |
| 15D07421         | 17.7 % ✓ | 0.4727875 ± 0.0007291 |  | 0.00210743 ± 0.00001572 | 0.0106 |
| 15D07423         | 18.5 %   | 0.4468374 ± 0.0007245 |  | 0.00220060 ± 0.00001764 | 0.0177 |
| 15D07424         | 19.5 %   | 0.4286276 ± 0.0007511 |  | 0.00225095 ± 0.00001939 | 0.0300 |
| 15D07425         | 20.5 %   | 0.4330079 ± 0.0008037 |  | 0.00223251 ± 0.00002047 | 0.0388 |
| 15D07427         | 21.7 %   | 0.4485780 ± 0.0008310 |  | 0.00220311 ± 0.00001999 | 0.0399 |
| 15D07428         | 22.8 %   | 0.4511808 ± 0.0008721 |  | 0.00216416 ± 0.00002096 | 0.0421 |

| Results          | 40(a)/36(a) ± 2σ      |        | 40(r)/39(k) ± 2σ     |  | Age ± 2σ<br>(Ma)           | MSWD |
|------------------|-----------------------|--------|----------------------|--|----------------------------|------|
| Inverse Isochron | 295.14 ± 1.71         |        | 0.79824 ± 0.00300    |  | 2.60 ± 0.01                | 2.75 |
| Error Chron      | ± 0.58%               |        | ± 0.38%              |  | ± 0.44%                    | 0%   |
|                  |                       |        |                      |  | Full External Error ± 0.06 |      |
|                  |                       |        |                      |  | Analytical Error ± 0.01    |      |
|                  |                       |        |                      |  |                            |      |
| Statistics       | 2σ Confidence Limit   | 1.57   | Convergence          |  | 0.0029302803               |      |
|                  | Error Magnification   | 1.6594 | Number of Iterations |  | 2                          |      |
|                  | Number of Data Points | 27     | Calculated Line      |  | Weighted York-2            |      |
|                  | Spreading Factor      | 58.4%  |                      |  |                            |      |



| OSU Argon Geochronology Lab |        |            |       |           |       |           |       |           |       |           |       |                   |               |             |             |             |
|-----------------------------|--------|------------|-------|-----------|-------|-----------|-------|-----------|-------|-----------|-------|-------------------|---------------|-------------|-------------|-------------|
| Relative Abundances         |        | 36Ar [fA]  | %1σ   | 37Ar [fA] | %1σ   | 38Ar [fA] | %1σ   | 39Ar [fA] | %1σ   | 40Ar [fA] | %1σ   | 40(r)/39(k) ± 2σ  | Age ± 2σ (Ma) | 40Ar(r) (%) | 39Ar(k) (%) | K/Ca ± 2σ   |
| 15D07375                    | 1.9 %  | 0.570589   | 0.457 | 4.5687    | 3.316 | 0.438382  | 8.649 | 27.8659   | 0.149 | 191.4803  | 0.056 | 0.83265 ± 0.05595 | 2.71 ± 0.18   | 12.12       | 0.49        | 2.62 ± 0.17 |
| 15D07376                    | 2.0 %  | 0.540614   | 0.467 | 5.2802    | 3.053 | 0.494822  | 8.257 | 30.6895   | 0.143 | 184.5770  | 0.058 | 0.82149 ± 0.04918 | 2.67 ± 0.16   | 13.66       | 0.54        | 2.50 ± 0.15 |
| 15D07378                    | 2.1 %  | 0.469850   | 0.474 | 5.1810    | 3.171 | 0.499795  | 7.862 | 29.0620   | 0.148 | 162.9835  | 0.065 | 0.84383 ± 0.04600 | 2.74 ± 0.15   | 15.04       | 0.51        | 2.41 ± 0.15 |
| 15D07379                    | 2.2 %  | 0.451587   | 0.469 | 5.2817    | 2.952 | 0.424805  | 9.265 | 30.5776   | 0.142 | 156.6078  | 0.068 | 0.77010 ± 0.04160 | 2.50 ± 0.14   | 15.03       | 0.54        | 2.49 ± 0.15 |
| 15D07380                    | 2.3 %  | 0.373013   | 0.477 | 4.6316    | 3.348 | 0.388352  | 9.935 | 27.3779   | 0.150 | 131.9231  | 0.080 | 0.80481 ± 0.03930 | 2.62 ± 0.13   | 16.70       | 0.48        | 2.54 ± 0.17 |
| 15D07382                    | 2.4 %  | 0.404037   | 0.508 | 6.1183    | 2.665 | 0.509565  | 7.711 | 33.1533   | 0.139 | 146.1641  | 0.072 | 0.82104 ± 0.03720 | 2.67 ± 0.12   | 18.62       | 0.59        | 2.33 ± 0.12 |
| 15D07383                    | 2.5 %  | 0.371728   | 0.513 | 5.9634    | 2.628 | 0.458635  | 8.612 | 32.7262   | 0.138 | 134.5467  | 0.078 | 0.76810 ± 0.03511 | 2.50 ± 0.11   | 18.68       | 0.58        | 2.36 ± 0.12 |
| 15D07384                    | 2.6 %  | 0.369274   | 0.557 | 6.3452    | 2.488 | 0.461756  | 8.292 | 35.2809   | 0.127 | 135.7025  | 0.076 | 0.76655 ± 0.03504 | 2.49 ± 0.11   | 19.93       | 0.62        | 2.39 ± 0.12 |
| 15D07387                    | 2.7 %  | ✓ 0.335983 | 0.525 | 5.8717    | 2.617 | 0.485193  | 8.330 | 33.0710   | 0.131 | 125.3927  | 0.084 | 0.80249 ± 0.03223 | 2.61 ± 0.10   | 21.16       | 0.58        | 2.42 ± 0.13 |
| 15D07388                    | 2.8 %  | ✓ 0.331043 | 0.532 | 6.8328    | 2.515 | 0.516157  | 7.718 | 37.7466   | 0.122 | 127.4948  | 0.082 | 0.79930 ± 0.02823 | 2.60 ± 0.09   | 23.66       | 0.67        | 2.38 ± 0.12 |
| 15D07389                    | 2.9 %  | ✓ 0.279871 | 0.580 | 6.4645    | 2.399 | 0.452162  | 8.585 | 35.6137   | 0.127 | 110.8539  | 0.094 | 0.80373 ± 0.02764 | 2.61 ± 0.09   | 25.82       | 0.63        | 2.37 ± 0.11 |
| 15D07391                    | 3.0 %  | ✓ 0.285734 | 0.568 | 7.4424    | 2.190 | 0.623406  | 6.049 | 40.7366   | 0.116 | 116.3324  | 0.090 | 0.79645 ± 0.02420 | 2.59 ± 0.08   | 27.89       | 0.72        | 2.35 ± 0.10 |
| 15D07392                    | 3.2 %  | ✓ 0.270649 | 0.630 | 7.8320    | 2.227 | 0.574484  | 7.202 | 43.6477   | 0.114 | 113.9863  | 0.093 | 0.79228 ± 0.02367 | 2.58 ± 0.08   | 30.33       | 0.77        | 2.40 ± 0.11 |
| 15D07393                    | 3.4 %  | ✓ 0.253546 | 0.575 | 7.9783    | 2.152 | 0.567420  | 7.151 | 44.6326   | 0.111 | 109.6684  | 0.095 | 0.79152 ± 0.01995 | 2.57 ± 0.06   | 32.21       | 0.79        | 2.41 ± 0.10 |
| 15D07395                    | 3.6 %  | ✓ 0.284994 | 0.564 | 10.2648   | 1.565 | 0.708589  | 5.501 | 57.7652   | 0.101 | 129.3165  | 0.080 | 0.79371 ± 0.01693 | 2.58 ± 0.06   | 35.45       | 1.02        | 2.42 ± 0.08 |
| 15D07396                    | 3.8 %  | ✓ 0.214211 | 0.666 | 8.6375    | 1.887 | 0.636279  | 6.083 | 49.9779   | 0.106 | 102.4366  | 0.101 | 0.79568 ± 0.01746 | 2.59 ± 0.06   | 38.82       | 0.88        | 2.49 ± 0.09 |
| 15D07397                    | 4.0 %  | ✓ 0.162742 | 0.737 | 6.5731    | 2.289 | 0.500436  | 7.781 | 39.2475   | 0.125 | 78.8850   | 0.132 | 0.79679 ± 0.01894 | 2.59 ± 0.06   | 39.64       | 0.69        | 2.57 ± 0.12 |
| 15D07399                    | 4.3 %  | ✓ 0.168014 | 0.718 | 8.1720    | 1.993 | 0.605785  | 6.388 | 48.3790   | 0.110 | 88.2407   | 0.118 | 0.80999 ± 0.01548 | 2.63 ± 0.05   | 44.40       | 0.85        | 2.55 ± 0.10 |
| 15D07400                    | 4.6 %  | ✓ 0.329321 | 0.568 | 17.7789   | 0.947 | 1.263133  | 2.980 | 103.4291  | 0.084 | 179.3482  | 0.059 | 0.80564 ± 0.01097 | 2.62 ± 0.04   | 46.46       | 1.83        | 2.50 ± 0.05 |
| 15D07401                    | 4.9 %  | ✓ 0.182539 | 0.713 | 13.7479   | 1.159 | 1.078486  | 3.718 | 84.0442   | 0.086 | 120.3975  | 0.087 | 0.80262 ± 0.00959 | 2.61 ± 0.03   | 56.02       | 1.49        | 2.63 ± 0.06 |
| 15D07403                    | 5.2 %  | ✓ 0.252074 | 0.565 | 20.5462   | 0.829 | 1.494036  | 2.729 | 122.7787  | 0.081 | 172.1985  | 0.061 | 0.80798 ± 0.00718 | 2.63 ± 0.02   | 57.60       | 2.17        | 2.57 ± 0.04 |
| 15D07404                    | 5.5 %  | ✓ 0.191339 | 0.667 | 25.1976   | 0.709 | 1.856119  | 2.085 | 152.3353  | 0.079 | 177.5015  | 0.059 | 0.80605 ± 0.00530 | 2.62 ± 0.02   | 69.17       | 2.69        | 2.60 ± 0.04 |
| 15D07405                    | 5.8 %  | ✓ 0.098746 | 0.975 | 15.1159   | 1.107 | 1.196835  | 3.192 | 100.2636  | 0.084 | 108.4810  | 0.096 | 0.80177 ± 0.00620 | 2.61 ± 0.02   | 74.10       | 1.77        | 2.85 ± 0.06 |
| 15D07407                    | 6.1 %  | ✓ 0.245585 | 0.603 | 27.9126   | 0.633 | 2.091026  | 1.862 | 170.4782  | 0.078 | 207.6846  | 0.051 | 0.80443 ± 0.00543 | 2.62 ± 0.02   | 66.02       | 3.01        | 2.63 ± 0.03 |
| 15D07408                    | 6.5 %  | ✓ 0.200248 | 0.673 | 39.6332   | 0.491 | 2.990128  | 1.318 | 243.0234  | 0.076 | 250.9666  | 0.043 | 0.80102 ± 0.00361 | 2.61 ± 0.01   | 77.56       | 4.29        | 2.64 ± 0.03 |
| 15D07409                    | 7.0 %  | ✓ 0.152207 | 0.786 | 32.3451   | 0.548 | 2.485456  | 1.535 | 200.7579  | 0.076 | 202.2783  | 0.053 | 0.79521 ± 0.00388 | 2.59 ± 0.01   | 78.91       | 3.55        | 2.67 ± 0.03 |
| 15D07411                    | 7.6 %  | ✓ 0.158236 | 0.722 | 34.5698   | 0.559 | 2.611477  | 1.521 | 214.6367  | 0.076 | 215.7642  | 0.049 | 0.79907 ± 0.00352 | 2.60 ± 0.01   | 79.48       | 3.79        | 2.67 ± 0.03 |
| 15D07412                    | 8.4 %  | ✓ 0.217935 | 0.647 | 47.4235   | 0.450 | 3.574440  | 1.088 | 292.7625  | 0.075 | 294.7266  | 0.036 | 0.79847 ± 0.00318 | 2.60 ± 0.01   | 79.31       | 5.17        | 2.65 ± 0.02 |
| 15D07413                    | 9.4 %  | ✓ 0.349983 | 0.498 | 60.5693   | 0.397 | 4.415440  | 0.912 | 356.7149  | 0.075 | 381.9301  | 0.029 | 0.79312 ± 0.00319 | 2.58 ± 0.01   | 74.07       | 6.30        | 2.53 ± 0.02 |
| 15D07415                    | 10.5 % | ✓ 0.418967 | 0.485 | 62.0557   | 0.390 | 4.148099  | 0.949 | 334.3537  | 0.075 | 385.6599  | 0.029 | 0.79676 ± 0.00385 | 2.59 ± 0.01   | 69.07       | 5.91        | 2.32 ± 0.02 |
| 15D07416                    | 11.7 % | ✓ 0.472257 | 0.454 | 61.5533   | 0.392 | 3.556072  | 1.105 | 288.5784  | 0.076 | 363.0677  | 0.031 | 0.79031 ± 0.00462 | 2.57 ± 0.02   | 62.81       | 5.10        | 2.02 ± 0.02 |
| 15D07417                    | 13.1 % | ✓ 1.001645 | 0.398 | 108.2218  | 0.331 | 4.924923  | 0.788 | 386.4630  | 0.075 | 592.6522  | 0.020 | 0.78866 ± 0.00624 | 2.56 ± 0.02   | 51.42       | 6.83        | 1.54 ± 0.01 |
| 15D07419                    | 14.7 % | ✓ 1.530385 | 0.371 | 173.2133  | 0.307 | 5.728597  | 0.694 | 434.1799  | 0.074 | 785.0412  | 0.015 | 0.79690 ± 0.00784 | 2.59 ± 0.03   | 44.06       | 7.67        | 1.08 ± 0.01 |
| 15D07420                    | 16.5 % | ✓ 1.978857 | 0.347 | 271.2484  | 0.299 | 6.249182  | 0.629 | 474.4180  | 0.074 | 938.5799  | 0.014 | 0.78975 ± 0.00866 | 2.57 ± 0.03   | 39.90       | 8.38        | 0.75 ± 0.00 |
| 15D07421                    | 17.7 % | ✓ 1.489930 | 0.360 | 187.6240  | 0.305 | 4.220455  | 0.930 | 323.2632  | 0.075 | 683.7983  | 0.017 | 0.79794 ± 0.00991 | 2.60 ± 0.03   | 37.71       | 5.71        | 0.74 ± 0.00 |
| 15D07423                    | 18.5 % | 1.068906   | 0.390 | 100.2624  | 0.335 | 2.803913  | 1.324 | 211.7323  | 0.077 | 473.9091  | 0.024 | 0.78266 ± 0.01176 | 2.55 ± 0.04   | 34.96       | 3.74        | 0.91 ± 0.01 |
| 15D07424                    | 19.5 % | 0.770491   | 0.419 | 67.5539   | 0.379 | 1.855142  | 2.142 | 143.3651  | 0.081 | 334.5133  | 0.034 | 0.78120 ± 0.01348 | 2.54 ± 0.04   | 33.47       | 2.53        | 0.91 ± 0.01 |
| 15D07425                    | 20.5 % | 0.614895   | 0.445 | 61.0807   | 0.395 | 1.510278  | 2.559 | 116.1740  | 0.083 | 268.3178  | 0.041 | 0.78588 ± 0.01410 | 2.56 ± 0.05   | 34.01       | 2.05        | 0.82 ± 0.01 |
| 15D07427                    | 21.7 % | 0.595068   | 0.436 | 76.0364   | 0.369 | 1.546856  | 2.448 | 117.1242  | 0.083 | 261.1053  | 0.041 | 0.77797 ± 0.01330 | 2.53 ± 0.04   | 34.88       | 2.07        | 0.66 ± 0.01 |
| 15D07428                    | 22.8 % | 0.554936   | 0.464 | 79.4419   | 0.358 | 1.472334  | 2.642 | 111.3711  | 0.086 | 246.8376  | 0.044 | 0.79900 ± 0.01388 | 2.60 ± 0.05   | 36.03       | 1.97        | 0.60 ± 0.00 |
| Σ                           |        | 19.012026  | 0.086 | 1702.5708 | 0.098 | 72.418450 | 0.342 | 5659.7982 | 0.016 | 9991.3515 | 0.007 |                   |               |             |             |             |

| Information on Analysis and Constants Used in Calculations | Results          | 40(a)/36(a) ± 2σ | 40(r)/39(k) ± 2σ | Age ± 2σ (Ma)              | MSWD              | 39Ar(k) (% ,n)       | K/Ca ± 2σ     |
|------------------------------------------------------------|------------------|------------------|------------------|----------------------------|-------------------|----------------------|---------------|
| Sample = 1180050-1A                                        | Age Plateau      |                  | 0.79774          | ± 0.00187                  |                   | 83.28                |               |
| Material = Groundmass                                      | Error Mean       |                  | ± 0.23%          | 2.59 ± 0.01 ± 0.33%        | 2.67 0%           | 27                   | 1.07 ± 0.23   |
| Location = Kerguelen Plateau                               |                  |                  |                  | Full External Error ± 0.06 | 1.55              | 2σ Confidence Limit  |               |
| Analyst = Dan Miggins                                      |                  |                  |                  | Analytical Error ± 0.01    | 1.6328            | Error Magnification  |               |
| Project = KERGUELEN   FALLOON (14-PIL-01)                  |                  |                  |                  |                            |                   |                      |               |
| Mass Discrimination Law = LIN                              | Total Fusion Age |                  | 0.79534          | ± 0.00174 ± 0.22%          |                   | 40                   | 1.43 ± 0.00   |
| Irradiation = 14-OSU-07 (7B19-14)                          |                  |                  |                  | Full External Error ± 0.06 |                   |                      |               |
| J = 0.00179979 ± 0.00000211                                |                  |                  |                  | Analytical Error ± 0.01    |                   |                      |               |
| FCT-NM = 28.201 ± 0.023 Ma                                 |                  |                  |                  |                            |                   |                      |               |
| IGSN = Undefined                                           |                  |                  |                  |                            |                   |                      |               |
| Preferred Age = Undefined                                  | Normal Isochron  | 295.09           | ± 1.70 ± 0.58%   | 0.79818                    | ± 0.00299 ± 0.37% | 2.60 ± 0.01 ± 0.44%  | 2.74 83.28 0% |
| Classification = Undefined                                 | Error Chron      |                  |                  |                            |                   |                      | 27            |
| Experiment Type = Incremental Heating                      |                  |                  |                  | Full External Error ± 0.06 | 1.57              | 2σ Confidence Limit  |               |
| Extraction Method = Undefined                              |                  |                  |                  | Analytical Error ± 0.01    | 1.6556            | Error Magnification  |               |
| Heating = 77 sec                                           |                  |                  |                  |                            | 18                | Number of Iterations |               |
| Isolation = 6.00 min                                       |                  |                  |                  |                            | 0.0000074721      | Convergence          |               |
| Instrument = ARGUS-VI-D                                    |                  |                  |                  |                            |                   |                      |               |
| Lithology = Undefined                                      | Inverse Isochron | 295.14           | ± 1.71 ± 0.58%   | 0.79824                    | ± 0.00300 ± 0.38% | 2.60 ± 0.01 ± 0.44%  | 2.75 83.28 0% |
| Lat-Lon = Undefined - Undefined                            | Error Chron      |                  |                  |                            |                   |                      | 27            |
| Collector Calibrations = 40Ar 36Ar                         |                  |                  |                  | Full External Error ± 0.06 | 1.57              | 2σ Confidence Limit  |               |



| OSU Argon Geochronology Lab |        |                 |      |                 |      |                  |      |                  |        |                  |      |                 |      |                 |      |                 |      |                  |      |                  |        |                 |      |                  |      |                 |      |                 |      |                 |      |                 |      |
|-----------------------------|--------|-----------------|------|-----------------|------|------------------|------|------------------|--------|------------------|------|-----------------|------|-----------------|------|-----------------|------|------------------|------|------------------|--------|-----------------|------|------------------|------|-----------------|------|-----------------|------|-----------------|------|-----------------|------|
| Degassing Patterns          |        | 36Ar(a)<br>[fA] | %1σ  | 36Ar(c)<br>[fA] | %1σ  | 36Ar(ca)<br>[fA] | %1σ  | 36Ar(cl)<br>[fA] | %1σ    | 37Ar(ca)<br>[fA] | %1σ  | 38Ar(a)<br>[fA] | %1σ  | 38Ar(c)<br>[fA] | %1σ  | 38Ar(k)<br>[fA] | %1σ  | 38Ar(ca)<br>[fA] | %1σ  | 38Ar(cl)<br>[fA] | %1σ    | 39Ar(k)<br>[fA] | %1σ  | 39Ar(ca)<br>[fA] | %1σ  | 40Ar(r)<br>[fA] | %1σ  | 40Ar(a)<br>[fA] | %1σ  | 40Ar(c)<br>[fA] | %1σ  | 40Ar(k)<br>[fA] | %1σ  |
| 15D07375                    | 1.9 %  | 0.569381        | 0.46 | 0.0000000       | 0.00 | 0.0012061        | 3.32 | 0.0000016        | 255.85 | 4.5687           | 3.32 | 0.1064174       | 0.46 | 0.0000000       | 0.00 | 0.317079        | 0.15 | 0.0000635        | 3.32 | 0.0148227        | 255.85 | 27.8628         | 0.15 | 0.0030747        | 3.32 | 23.1999         | 3.36 | 168.2522        | 0.46 | 0.0000000       | 0.00 | 0.0281414       | 0.15 |
| 15D07376                    | 2.0 %  | 0.539215        | 0.47 | 0.0000000       | 0.00 | 0.0013940        | 3.05 | 0.0000048        | 91.29  | 5.2802           | 3.05 | 0.1007792       | 0.47 | 0.0000000       | 0.00 | 0.349206        | 0.14 | 0.0000734        | 3.05 | 0.0447638        | 91.30  | 30.6859         | 0.14 | 0.0035536        | 3.05 | 25.2081         | 2.99 | 159.3379        | 0.47 | 0.0000000       | 0.00 | 0.0309928       | 0.14 |
| 15D07378                    | 2.1 %  | 0.468473        | 0.48 | 0.0000000       | 0.00 | 0.0013678        | 3.17 | 0.0000088        | 48.24  | 5.1810           | 3.17 | 0.0875576       | 0.48 | 0.0000000       | 0.00 | 0.330686        | 0.15 | 0.0000720        | 3.17 | 0.0814797        | 48.25  | 29.0585         | 0.15 | 0.0034868        | 3.17 | 24.5203         | 2.72 | 138.4338        | 0.48 | 0.0000000       | 0.00 | 0.0293491       | 0.15 |
| 15D07379                    | 2.2 %  | 0.450192        | 0.47 | 0.0000000       | 0.00 | 0.0013944        | 2.95 | 0.0000000        | 0.00   | 5.2817           | 2.95 | 0.0841409       | 0.47 | 0.0000000       | 0.00 | 0.347932        | 0.14 | 0.0000734        | 2.95 | 0.0000000        | 0.00   | 30.5740         | 0.14 | 0.0035546        | 2.95 | 23.5451         | 2.70 | 133.0318        | 0.47 | 0.0000000       | 0.00 | 0.0308798       | 0.14 |
| 15D07380                    | 2.3 %  | 0.371790        | 0.48 | 0.0000000       | 0.00 | 0.0012227        | 3.35 | 0.0000008        | 530.46 | 4.6316           | 3.35 | 0.0694875       | 0.48 | 0.0000000       | 0.00 | 0.311525        | 0.15 | 0.0000644        | 3.35 | 0.0072745        | 530.46 | 27.3748         | 0.15 | 0.0031171        | 3.35 | 22.0316         | 2.44 | 109.8638        | 0.48 | 0.0000000       | 0.00 | 0.0276486       | 0.15 |
| 15D07382                    | 2.4 %  | 0.402416        | 0.51 | 0.0000000       | 0.00 | 0.0016152        | 2.67 | 0.0000062        | 68.91  | 6.1183           | 2.67 | 0.0752115       | 0.51 | 0.0000000       | 0.00 | 0.377238        | 0.14 | 0.0000850        | 2.67 | 0.0570307        | 68.92  | 33.1492         | 0.14 | 0.0041176        | 2.67 | 27.2168         | 2.26 | 118.9138        | 0.51 | 0.0000000       | 0.00 | 0.0334807       | 0.14 |
| 15D07383                    | 2.5 %  | 0.370152        | 0.52 | 0.0000000       | 0.00 | 0.0015743        | 2.63 | 0.0000018        | 232.48 | 5.9634           | 2.63 | 0.0691813       | 0.52 | 0.0000000       | 0.00 | 0.372378        | 0.14 | 0.0000829        | 2.63 | 0.0169925        | 232.48 | 32.7222         | 0.14 | 0.0040134        | 2.63 | 25.1339         | 2.28 | 109.3798        | 0.52 | 0.0000000       | 0.00 | 0.0330494       | 0.14 |
| 15D07384                    | 2.6 %  | 0.367599        | 0.56 | 0.0000000       | 0.00 | 0.0016751        | 2.49 | 0.0000000        | 0.00   | 6.3452           | 2.49 | 0.0687042       | 0.56 | 0.0000000       | 0.00 | 0.401448        | 0.13 | 0.0000882        | 2.49 | 0.0000000        | 0.00   | 35.2766         | 0.13 | 0.0042703        | 2.49 | 27.0414         | 2.28 | 108.6255        | 0.56 | 0.0000000       | 0.00 | 0.0356294       | 0.13 |
| 15D07387                    | 2.7 %  | ✓ 0.334428      | 0.53 | 0.0000000       | 0.00 | 0.0015501        | 2.62 | 0.0000050        | 87.30  | 5.8717           | 2.62 | 0.0625046       | 0.53 | 0.0000000       | 0.00 | 0.376303        | 0.13 | 0.0000816        | 2.62 | 0.0463042        | 87.30  | 33.0670         | 0.13 | 0.0039517        | 2.62 | 26.5359         | 2.00 | 98.8234         | 0.53 | 0.0000000       | 0.00 | 0.0333977       | 0.13 |
| 15D07388                    | 2.8 %  | ✓ 0.329237      | 0.54 | 0.0000000       | 0.00 | 0.0018039        | 2.51 | 0.0000027        | 159.23 | 6.8328           | 2.51 | 0.0615343       | 0.54 | 0.0000000       | 0.00 | 0.429504        | 0.12 | 0.0000950        | 2.51 | 0.0250239        | 159.23 | 37.7420         | 0.12 | 0.0045985        | 2.51 | 30.1673         | 1.76 | 97.2894         | 0.54 | 0.0000000       | 0.00 | 0.0381194       | 0.12 |
| 15D07389                    | 2.9 %  | ✓ 0.278164      | 0.58 | 0.0000000       | 0.00 | 0.0017066        | 2.40 | 0.0000000        | 0.00   | 6.4645           | 2.40 | 0.0519889       | 0.58 | 0.0000000       | 0.00 | 0.405234        | 0.13 | 0.0000899        | 2.40 | 0.0000000        | 0.00   | 35.6093         | 0.13 | 0.0043506        | 2.40 | 28.6204         | 1.71 | 82.1975         | 0.58 | 0.0000000       | 0.00 | 0.0359654       | 0.13 |
| 15D07391                    | 3.0 %  | ✓ 0.283758      | 0.57 | 0.0000000       | 0.00 | 0.0019648        | 2.19 | 0.0000116        | 35.34  | 7.4424           | 2.19 | 0.0530344       | 0.57 | 0.0000000       | 0.00 | 0.463526        | 0.12 | 0.0001034        | 2.19 | 0.1067426        | 35.35  | 40.7316         | 0.12 | 0.0050087        | 2.19 | 32.4408         | 1.51 | 83.8505         | 0.57 | 0.0000000       | 0.00 | 0.0411389       | 0.12 |
| 15D07392                    | 3.2 %  | ✓ 0.268579      | 0.63 | 0.0000000       | 0.00 | 0.0020677        | 2.23 | 0.0000030        | 150.34 | 7.8320           | 2.23 | 0.0501974       | 0.63 | 0.0000000       | 0.00 | 0.496651        | 0.11 | 0.0001089        | 2.23 | 0.0275272        | 150.34 | 43.6424         | 0.11 | 0.0052710        | 2.23 | 34.5772         | 1.49 | 79.3650         | 0.63 | 0.0000000       | 0.00 | 0.0440788       | 0.11 |
| 15D07393                    | 3.4 %  | ✓ 0.251439      | 0.58 | 0.0000000       | 0.00 | 0.0021063        | 2.15 | 0.0000013        | 325.75 | 7.9783           | 2.15 | 0.0469939       | 0.58 | 0.0000000       | 0.00 | 0.507857        | 0.11 | 0.0001109        | 2.15 | 0.0124581        | 325.75 | 44.6272         | 0.11 | 0.0053694        | 2.15 | 35.3232         | 1.26 | 74.3001         | 0.58 | 0.0000000       | 0.00 | 0.0450735       | 0.11 |
| 15D07395                    | 3.6 %  | ✓ 0.282284      | 0.57 | 0.0000000       | 0.00 | 0.0027099        | 1.56 | 0.0000000        | 0.00   | 10.2648          | 1.56 | 0.0527589       | 0.57 | 0.0000000       | 0.00 | 0.657289        | 0.10 | 0.0001427        | 1.56 | 0.0000000        | 0.00   | 57.7583         | 0.10 | 0.0069082        | 1.56 | 45.8432         | 1.06 | 83.4150         | 0.57 | 0.0000000       | 0.00 | 0.0583359       | 0.10 |
| 15D07396                    | 3.8 %  | ✓ 0.211927      | 0.67 | 0.0000000       | 0.00 | 0.0022803        | 1.89 | 0.0000030        | 138.91 | 8.6375           | 1.89 | 0.0396092       | 0.67 | 0.0000000       | 0.00 | 0.568682        | 0.11 | 0.0001201        | 1.89 | 0.0278678        | 138.91 | 49.9721         | 0.11 | 0.0058130        | 1.89 | 39.7615         | 1.09 | 62.6246         | 0.67 | 0.0000000       | 0.00 | 0.0504718       | 0.11 |
| 15D07397                    | 4.0 %  | ✓ 0.161004      | 0.75 | 0.0000000       | 0.00 | 0.0017353        | 2.29 | 0.0000026        | 164.56 | 6.5731           | 2.29 | 0.0300917       | 0.75 | 0.0000000       | 0.00 | 0.446586        | 0.13 | 0.0000914        | 2.29 | 0.0236674        | 164.56 | 39.2430         | 0.13 | 0.0044237        | 2.29 | 31.2686         | 1.18 | 47.5767         | 0.75 | 0.0000000       | 0.00 | 0.0396355       | 0.13 |
| 15D07399                    | 4.3 %  | ✓ 0.165854      | 0.73 | 0.0000000       | 0.00 | 0.0021574        | 1.99 | 0.0000026        | 160.05 | 8.1720           | 1.99 | 0.0309982       | 0.73 | 0.0000000       | 0.00 | 0.550490        | 0.11 | 0.0001136        | 1.99 | 0.0241834        | 160.05 | 48.3735         | 0.11 | 0.0054998        | 1.99 | 39.1819         | 0.95 | 49.0099         | 0.73 | 0.0000000       | 0.00 | 0.0488572       | 0.11 |
| 15D07400                    | 4.6 %  | ✓ 0.324624      | 0.58 | 0.0000000       | 0.00 | 0.0046936        | 0.95 | 0.0000027        | 148.71 | 17.7789          | 0.95 | 0.0606723       | 0.58 | 0.0000000       | 0.00 | 1.176887        | 0.08 | 0.0002471        | 0.95 | 0.0253270        | 148.71 | 103.4171        | 0.08 | 0.0119652        | 0.95 | 83.3173         | 0.68 | 95.9264         | 0.58 | 0.0000000       | 0.00 | 0.1044513       | 0.08 |
| 15D07401                    | 4.9 %  | ✓ 0.178900      | 0.73 | 0.0000000       | 0.00 | 0.0036294        | 1.16 | 0.0000096        | 45.31  | 13.7479          | 1.16 | 0.0334363       | 0.73 | 0.0000000       | 0.00 | 0.956318        | 0.09 | 0.0001911        | 1.16 | 0.0885415        | 45.32  | 84.0349         | 0.09 | 0.0092523        | 1.16 | 67.4478         | 0.59 | 52.8648         | 0.73 | 0.0000000       | 0.00 | 0.0848753       | 0.09 |
| 15D07403                    | 5.2 %  | ✓ 0.246644      | 0.58 | 0.0000000       | 0.00 | 0.0054242        | 0.83 | 0.0000055        | 80.63  | 20.5462          | 0.83 | 0.0460978       | 0.58 | 0.0000000       | 0.00 | 1.397064        | 0.08 | 0.0002856        | 0.83 | 0.0505887        | 80.63  | 122.7648        | 0.08 | 0.0138276        | 0.83 | 99.1911         | 0.44 | 72.8834         | 0.58 | 0.0000000       | 0.00 | 0.1239925       | 0.08 |
| 15D07404                    | 5.5 %  | ✓ 0.184677      | 0.69 | 0.0000000       | 0.00 | 0.0066522        | 0.71 | 0.0000095        | 44.08  | 25.1976          | 0.71 | 0.0345161       | 0.69 | 0.0000000       | 0.00 | 1.733383        | 0.08 | 0.0003502        | 0.71 | 0.0878700        | 44.09  | 152.3184        | 0.08 | 0.0169580        | 0.71 | 122.7756        | 0.32 | 54.5720         | 0.69 | 0.0000000       | 0.00 | 0.1538415       | 0.08 |
| 15D07405                    | 5.8 %  | ✓ 0.094751      | 1.02 | 0.0000000       | 0.00 | 0.0039906        | 1.11 | 0.0000041        | 100.50 | 15.1159          | 1.11 | 0.0177090       | 1.02 | 0.0000000       | 0.00 | 1.140884        | 0.08 | 0.0002101        | 1.11 | 0.0380311        | 100.50 | 100.2535        | 0.08 | 0.0101730        | 1.11 | 80.3807         | 0.38 | 27.9990         | 1.02 | 0.0000000       | 0.00 | 0.1012560       | 0.08 |
| 15D07407                    | 6.1 %  | ✓ 0.238205      | 0.62 | 0.0000000       | 0.00 | 0.0073689        | 0.63 | 0.0000115        | 36.67  | 27.9126          | 0.63 | 0.0445204       | 0.62 | 0.0000000       | 0.00 | 1.939828        | 0.08 | 0.0003880        | 0.63 | 0.1062896        | 36.68  | 170.4594        | 0.08 | 0.0187851        | 0.63 | 137.1230        | 0.33 | 70.3895         | 0.62 | 0.0000000       | 0.00 | 0.1721640       | 0.08 |
| 15D07408                    | 6.5 %  | ✓ 0.189764      | 0.71 | 0.0000000       | 0.00 | 0.0104632        | 0.49 | 0.0000205        | 20.92  | 39.6332          | 0.49 | 0.0354669       | 0.71 | 0.0000000       | 0.00 | 2.765302        | 0.08 | 0.0005509        | 0.49 | 0.1888074        | 20.94  | 242.9967        | 0.08 | 0.0266731        | 0.49 | 194.6459        | 0.21 | 56.0753         | 0.71 | 0.0000000       | 0.00 | 0.2454267       | 0.08 |
| 15D07409                    | 7.0 %  | ✓ 0.143649      | 0.83 | 0.0000000       | 0.00 | 0.0085391        | 0.55 | 0.0000189        | 22.00  | 32.3451          | 0.55 | 0.0268479       | 0.83 | 0.0000000       | 0.00 | 2.284377        | 0.08 | 0.0004496        | 0.55 | 0.1737817        | 22.02  | 200.7361        | 0.08 | 0.0217682        | 0.55 | 159.6273        | 0.23 | 42.4482         | 0.83 | 0.0000000       | 0.00 | 0.2027434       | 0.08 |
| 15D07411                    | 7.6 %  | ✓ 0.149094      | 0.77 | 0.0000000       | 0.00 | 0.0091264        | 0.56 | 0.0000153        | 28.25  | 34.5698          | 0.56 | 0.0278656       | 0.77 | 0.0000000       | 0.00 | 2.442301        | 0.08 | 0.0004805        | 0.56 | 0.1408306        | 28.26  | 214.6134        | 0.08 | 0.0232655        | 0.56 | 171.4902        | 0.21 | 44.0572         | 0.77 | 0.0000000       | 0.00 | 0.2167596       | 0.08 |
| 15D07412                    | 8.4 %  | ✓ 0.205393      | 0.69 | 0.0000000       | 0.00 | 0.0125198        | 0.45 | 0.0000222        | 19.12  | 47.4235          | 0.45 | 0.0383879       | 0.69 | 0.0000000       | 0.00 | 3.331274        | 0.08 | 0.0006592        | 0.45 | 0.2041188        | 19.14  | 292.7306        | 0.08 | 0.0319160        | 0.45 | 233.7374        | 0.18 | 60.6935         | 0.69 | 0.0000000       | 0.00 | 0.2956579       | 0.08 |
| 15D07413                    | 9.4 %  | ✓ 0.333961      | 0.52 | 0.0000000       | 0.00 | 0.0159903        | 0.40 | 0.0000319        | 13.80  | 60.5693          | 0.40 | 0.0624174       | 0.52 | 0.0000000       | 0.00 | 4.058952        | 0.07 | 0.0008419        | 0.40 | 0.2932286        | 13.83  | 356.6742        | 0.07 | 0.0407631        | 0.40 | 282.8843        | 0.19 | 98.6855         | 0.52 | 0.0000000       | 0.00 | 0.3602409       | 0.07 |
| 15D07415                    | 10.5 % | ✓ 0.402556      | 0.50 | 0.0000000       | 0.00 | 0.0163827        | 0.39 | 0.0000291        | 14.79  | 62.0557          | 0.39 | 0.0752377       | 0.50 | 0.0000000       | 0.00 | 3.804469        | 0.08 | 0.0008626        | 0.39 | 0.2675293        | 14.82  | 334.3119        | 0.08 | 0.0417635        | 0.39 | 266.3670        | 0.23 | 118.9552        | 0.50 | 0.0000000       | 0.00 | 0.3376550       | 0.08 |
| 15D07416                    | 11.7 % | ✓ 0.455986      | 0.47 | 0.0000000       |      |                  |      |                  |        |                  |      |                 |      |                 |      |                 |      |                  |      |                  |        |                 |      |                  |      |                 |      |                 |      |                 |      |                 |      |



| Additional<br>Parameters |          | 40Ar/39Ar | 1σ       | 37Ar/39Ar | 1σ       | 36Ar/39Ar | 1σ       | Time<br>(days) | 37Ar<br>(decay) | 39Ar<br>(decay) | 40Ar<br>(moles) |
|--------------------------|----------|-----------|----------|-----------|----------|-----------|----------|----------------|-----------------|-----------------|-----------------|
| 15D07375                 | 1.9 %    | 6.871497  | 0.010941 | 0.163952  | 0.005442 | 0.020476  | 0.000099 | 66.554         | 3.732379        | 1.00047060      | 9.191E-12       |
| 15D07376                 | 2.0 %    | 6.014347  | 0.009302 | 0.172053  | 0.005259 | 0.017616  | 0.000086 | 66.565         | 3.733147        | 1.00047067      | 8.860E-12       |
| 15D07378                 | 2.1 %    | 5.608137  | 0.009099 | 0.178273  | 0.005660 | 0.016167  | 0.000080 | 66.583         | 3.734530        | 1.00047080      | 7.823E-12       |
| 15D07379                 | 2.2 %    | 5.121653  | 0.008067 | 0.172730  | 0.005104 | 0.014769  | 0.000072 | 66.593         | 3.735247        | 1.00047087      | 7.517E-12       |
| 15D07380                 | 2.3 %    | 4.818594  | 0.008175 | 0.169174  | 0.005670 | 0.013625  | 0.000068 | 66.603         | 3.735965        | 1.00047094      | 6.332E-12       |
| 15D07382                 | 2.4 %    | 4.408734  | 0.006885 | 0.184545  | 0.004925 | 0.012187  | 0.000064 | 66.621         | 3.737297        | 1.00047107      | 7.016E-12       |
| 15D07383                 | 2.5 %    | 4.111288  | 0.006503 | 0.182221  | 0.004795 | 0.011359  | 0.000060 | 66.631         | 3.738015        | 1.00047114      | 6.458E-12       |
| 15D07384                 | 2.6 %    | 3.846344  | 0.005707 | 0.179849  | 0.004480 | 0.010467  | 0.000060 | 66.640         | 3.738682        | 1.00047120      | 6.514E-12       |
| 15D07387                 | 2.7 % ✓  | 3.791623  | 0.005916 | 0.177549  | 0.004653 | 0.010159  | 0.000055 | 66.667         | 3.740682        | 1.00047139      | 6.019E-12       |
| 15D07388                 | 2.8 % ✓  | 3.377653  | 0.004969 | 0.181017  | 0.004557 | 0.008770  | 0.000048 | 66.676         | 3.741349        | 1.00047146      | 6.120E-12       |
| 15D07389                 | 2.9 % ✓  | 3.112679  | 0.004920 | 0.181519  | 0.004360 | 0.007859  | 0.000047 | 66.685         | 3.742016        | 1.00047152      | 5.321E-12       |
| 15D07391                 | 3.0 % ✓  | 2.855720  | 0.004207 | 0.182695  | 0.004006 | 0.007014  | 0.000041 | 66.702         | 3.743300        | 1.00047164      | 5.584E-12       |
| 15D07392                 | 3.2 % ✓  | 2.611509  | 0.003850 | 0.179437  | 0.004002 | 0.006201  | 0.000040 | 66.711         | 3.743967        | 1.00047171      | 5.471E-12       |
| 15D07393                 | 3.4 % ✓  | 2.457138  | 0.003592 | 0.178755  | 0.003852 | 0.005681  | 0.000033 | 66.719         | 3.744584        | 1.00047177      | 5.264E-12       |
| 15D07395                 | 3.6 % ✓  | 2.238658  | 0.002894 | 0.177698  | 0.002786 | 0.004934  | 0.000028 | 66.737         | 3.745868        | 1.00047189      | 6.207E-12       |
| 15D07396                 | 3.8 % ✓  | 2.049638  | 0.003015 | 0.172827  | 0.003266 | 0.004286  | 0.000029 | 66.746         | 3.746536        | 1.00047195      | 4.917E-12       |
| 15D07397                 | 4.0 % ✓  | 2.009939  | 0.003649 | 0.167477  | 0.003839 | 0.004147  | 0.000031 | 66.754         | 3.747153        | 1.00047201      | 3.786E-12       |
| 15D07399                 | 4.3 % ✓  | 1.823947  | 0.002945 | 0.168916  | 0.003372 | 0.003473  | 0.000025 | 66.772         | 3.748438        | 1.00047213      | 4.236E-12       |
| 15D07400                 | 4.6 % ✓  | 1.734021  | 0.001780 | 0.171894  | 0.001635 | 0.003184  | 0.000018 | 66.781         | 3.749106        | 1.00047220      | 8.609E-12       |
| 15D07401                 | 4.9 % ✓  | 1.432550  | 0.001759 | 0.163579  | 0.001900 | 0.002172  | 0.000016 | 66.789         | 3.749724        | 1.00047226      | 5.779E-12       |
| 15D07403                 | 5.2 % ✓  | 1.402511  | 0.001415 | 0.167344  | 0.001393 | 0.002053  | 0.000012 | 66.806         | 3.751010        | 1.00047238      | 8.266E-12       |
| 15D07404                 | 5.5 % ✓  | 1.165202  | 0.001148 | 0.165409  | 0.001180 | 0.001256  | 0.000008 | 66.815         | 3.751627        | 1.00047244      | 8.520E-12       |
| 15D07405                 | 5.8 % ✓  | 1.081957  | 0.001380 | 0.150761  | 0.001673 | 0.000985  | 0.000010 | 66.824         | 3.752296        | 1.00047250      | 5.207E-12       |
| 15D07407                 | 6.1 % ✓  | 1.218247  | 0.001135 | 0.163731  | 0.001044 | 0.001441  | 0.000009 | 66.841         | 3.753583        | 1.00047262      | 9.969E-12       |
| 15D07408                 | 6.5 % ✓  | 1.032685  | 0.000897 | 0.163084  | 0.000811 | 0.000824  | 0.000006 | 66.849         | 3.754201        | 1.00047268      | 1.205E-11       |
| 15D07409                 | 7.0 % ✓  | 1.007573  | 0.000937 | 0.161115  | 0.000891 | 0.000758  | 0.000006 | 66.858         | 3.754870        | 1.00047275      | 9.709E-12       |
| 15D07411                 | 7.6 % ✓  | 1.005253  | 0.000912 | 0.161062  | 0.000908 | 0.000737  | 0.000005 | 66.876         | 3.756158        | 1.00047287      | 1.036E-11       |
| 15D07412                 | 8.4 % ✓  | 1.006709  | 0.000840 | 0.161986  | 0.000739 | 0.000744  | 0.000005 | 66.884         | 3.756777        | 1.00047293      | 1.415E-11       |
| 15D07413                 | 9.4 % ✓  | 1.070687  | 0.000860 | 0.169797  | 0.000686 | 0.000981  | 0.000005 | 66.893         | 3.757447        | 1.00047299      | 1.833E-11       |
| 15D07415                 | 10.5 % ✓ | 1.153449  | 0.000931 | 0.185599  | 0.000738 | 0.001253  | 0.000006 | 66.910         | 3.758735        | 1.00047311      | 1.851E-11       |
| 15D07416                 | 11.7 % ✓ | 1.258125  | 0.001027 | 0.213298  | 0.000851 | 0.001636  | 0.000008 | 66.919         | 3.759354        | 1.00047317      | 1.743E-11       |
| 15D07417                 | 13.1 % ✓ | 1.533529  | 0.001185 | 0.280032  | 0.000951 | 0.002592  | 0.000010 | 66.928         | 3.760024        | 1.00047324      | 2.845E-11       |
| 15D07419                 | 14.7 % ✓ | 1.808101  | 0.001374 | 0.398944  | 0.001260 | 0.003525  | 0.000013 | 66.945         | 3.761314        | 1.00047336      | 3.768E-11       |
| 15D07420                 | 16.5 % ✓ | 1.978382  | 0.001497 | 0.571750  | 0.001764 | 0.004171  | 0.000015 | 66.953         | 3.761933        | 1.00047342      | 4.505E-11       |
| 15D07421                 | 17.7 % ✓ | 2.115299  | 0.001630 | 0.580406  | 0.001825 | 0.004609  | 0.000017 | 66.963         | 3.762604        | 1.00047348      | 3.282E-11       |
| 15D07423                 | 18.5 %   | 2.238247  | 0.001814 | 0.473534  | 0.001628 | 0.005048  | 0.000020 | 66.980         | 3.763895        | 1.00047360      | 2.275E-11       |
| 15D07424                 | 19.5 %   | 2.333297  | 0.002044 | 0.471202  | 0.001827 | 0.005374  | 0.000023 | 66.989         | 3.764566        | 1.00047367      | 1.606E-11       |
| 15D07425                 | 20.5 %   | 2.309619  | 0.002143 | 0.525769  | 0.002122 | 0.005293  | 0.000024 | 66.998         | 3.765237        | 1.00047373      | 1.288E-11       |
| 15D07427                 | 21.7 %   | 2.229302  | 0.002064 | 0.649195  | 0.002454 | 0.005081  | 0.000023 | 67.016         | 3.766580        | 1.00047386      | 1.253E-11       |
| 15D07428                 | 22.8 %   | 2.216352  | 0.002141 | 0.713308  | 0.002625 | 0.004983  | 0.000024 | 67.025         | 3.767252        | 1.00047392      | 1.185E-11       |



| Procedure<br>Blanks |        | 36Ar<br>[fA] | 1σ        | 37Ar<br>[fA] | 1σ        | 38Ar<br>[fA] | 1σ        | 39Ar<br>[fA] | 1σ        | 40Ar<br>[fA] | 1σ        |
|---------------------|--------|--------------|-----------|--------------|-----------|--------------|-----------|--------------|-----------|--------------|-----------|
| 15D07375            | 1.9 %  | 0.0108484    | 0.0003106 | 0.0039324    | 0.0290858 | 0.0887274    | 0.0280722 | 0.0049511    | 0.0243445 | 2.9825720    | 0.0978553 |
| 15D07376            | 2.0 %  | 0.0105371    | 0.0003106 | 0.0057510    | 0.0290858 | 0.0893942    | 0.0280722 | 0.0032654    | 0.0243445 | 2.9250137    | 0.0978553 |
| 15D07378            | 2.1 %  | 0.0101341    | 0.0003106 | 0.0178703    | 0.0290858 | 0.0891629    | 0.0280722 | 0.0004359    | 0.0243445 | 2.8499422    | 0.0978553 |
| 15D07379            | 2.2 %  | 0.0099921    | 0.0003106 | 0.0217734    | 0.0290858 | 0.0884704    | 0.0280722 | 0.0009275    | 0.0243445 | 2.8227730    | 0.0978553 |
| 15D07380            | 2.3 %  | 0.0098881    | 0.0003106 | 0.0242490    | 0.0290858 | 0.0874815    | 0.0280722 | 0.0022201    | 0.0243445 | 2.8019834    | 0.0978553 |
| 15D07382            | 2.4 %  | 0.0097770    | 0.0003106 | 0.0255535    | 0.0290858 | 0.0850813    | 0.0280722 | 0.0044328    | 0.0243445 | 2.7764622    | 0.0978553 |
| 15D07383            | 2.5 %  | 0.0097523    | 0.0003106 | 0.0247388    | 0.0290858 | 0.0835952    | 0.0280722 | 0.0055230    | 0.0243445 | 2.7679084    | 0.0978553 |
| 15D07384            | 2.6 %  | 0.0097460    | 0.0003106 | 0.0231825    | 0.0290858 | 0.0821550    | 0.0280722 | 0.0064720    | 0.0243445 | 2.7621998    | 0.0978553 |
| 15D07387            | 2.7 %  | 0.0097923    | 0.0003106 | 0.0149194    | 0.0290858 | 0.0778651    | 0.0280722 | 0.0089525    | 0.0243445 | 2.7519011    | 0.0978553 |
| 15D07388            | 2.8 %  | 0.0098201    | 0.0003106 | 0.0112867    | 0.0290858 | 0.0765521    | 0.0280722 | 0.0096572    | 0.0243445 | 2.7490976    | 0.0978553 |
| 15D07389            | 2.9 %  | 0.0098503    | 0.0003106 | 0.0073660    | 0.0290858 | 0.0753422    | 0.0280722 | 0.0103008    | 0.0243445 | 2.7459586    | 0.0978553 |
| 15D07391            | 3.0 %  | 0.0099078    | 0.0003106 | 0.0006712    | 0.0290858 | 0.0733823    | 0.0280722 | 0.0113669    | 0.0243445 | 2.7379848    | 0.0978553 |
| 15D07392            | 3.2 %  | 0.0099346    | 0.0003106 | 0.0049552    | 0.0290858 | 0.0725854    | 0.0280722 | 0.0118321    | 0.0243445 | 2.7324767    | 0.0978553 |
| 15D07393            | 3.4 %  | 0.0099560    | 0.0003106 | 0.0088861    | 0.0290858 | 0.0719990    | 0.0280722 | 0.0122072    | 0.0243445 | 2.7264498    | 0.0978553 |
| 15D07395            | 3.6 %  | 0.0099874    | 0.0003106 | 0.0167520    | 0.0290858 | 0.0712632    | 0.0280722 | 0.0128216    | 0.0243445 | 2.7109806    | 0.0978553 |
| 15D07396            | 3.8 %  | 0.0099958    | 0.0003106 | 0.0205432    | 0.0290858 | 0.0711462    | 0.0280722 | 0.0130519    | 0.0243445 | 2.7015343    | 0.0978553 |
| 15D07397            | 4.0 %  | 0.0099986    | 0.0003106 | 0.0237892    | 0.0290858 | 0.0711984    | 0.0280722 | 0.0132102    | 0.0243445 | 2.6921501    | 0.0978553 |
| 15D07399            | 4.3 %  | 0.0099897    | 0.0003106 | 0.0295647    | 0.0290858 | 0.0717805    | 0.0280722 | 0.0133730    | 0.0243445 | 2.6714768    | 0.0978553 |
| 15D07400            | 4.6 %  | 0.0099783    | 0.0003106 | 0.0319394    | 0.0290858 | 0.0723172    | 0.0280722 | 0.0133684    | 0.0243445 | 2.6607787    | 0.0978553 |
| 15D07401            | 4.9 %  | 0.0099646    | 0.0003106 | 0.0336925    | 0.0290858 | 0.0729385    | 0.0280722 | 0.0133099    | 0.0243445 | 2.6514248    | 0.0978553 |
| 15D07403            | 5.2 %  | 0.0099310    | 0.0003106 | 0.0358332    | 0.0290858 | 0.0745540    | 0.0280722 | 0.0130210    | 0.0243445 | 2.6354039    | 0.0978553 |
| 15D07404            | 5.5 %  | 0.0099150    | 0.0003106 | 0.0360672    | 0.0290858 | 0.0754451    | 0.0280722 | 0.0128021    | 0.0243445 | 2.6303885    | 0.0978553 |
| 15D07405            | 5.8 %  | 0.0099002    | 0.0003106 | 0.0356943    | 0.0290858 | 0.0764612    | 0.0280722 | 0.0125062    | 0.0243445 | 2.6277696    | 0.0978553 |
| 15D07407            | 6.1 %  | 0.0098871    | 0.0003106 | 0.0330301    | 0.0290858 | 0.0784471    | 0.0280722 | 0.0117656    | 0.0243445 | 2.6338230    | 0.0978553 |
| 15D07408            | 6.5 %  | 0.0098926    | 0.0003106 | 0.0307942    | 0.0290858 | 0.0793536    | 0.0280722 | 0.0113299    | 0.0243445 | 2.6433887    | 0.0978553 |
| 15D07409            | 7.0 %  | 0.0099107    | 0.0003106 | 0.0276419    | 0.0290858 | 0.0802514    | 0.0280722 | 0.0107992    | 0.0243445 | 2.6598109    | 0.0978553 |
| 15D07411            | 7.6 %  | 0.0099933    | 0.0003106 | 0.0193776    | 0.0290858 | 0.0815665    | 0.0280722 | 0.0096069    | 0.0243445 | 2.7129258    | 0.0978553 |
| 15D07412            | 8.4 %  | 0.0100615    | 0.0003106 | 0.0143564    | 0.0290858 | 0.0819216    | 0.0280722 | 0.0089544    | 0.0243445 | 2.7504099    | 0.0978553 |
| 15D07413            | 9.4 %  | 0.0101612    | 0.0003106 | 0.0081319    | 0.0290858 | 0.0820376    | 0.0280722 | 0.0081888    | 0.0243445 | 2.8013056    | 0.0978553 |
| 15D07415            | 10.5 % | 0.0104444    | 0.0003106 | 0.0061535    | 0.0290858 | 0.0812626    | 0.0280722 | 0.0065449    | 0.0243445 | 2.9340343    | 0.0978553 |
| 15D07416            | 11.7 % | 0.0106309    | 0.0003106 | 0.0140954    | 0.0290858 | 0.0803177    | 0.0280722 | 0.0056756    | 0.0243445 | 3.0164057    | 0.0978553 |
| 15D07417            | 13.1 % | 0.0108764    | 0.0003106 | 0.0234902    | 0.0290858 | 0.0787919    | 0.0280722 | 0.0046751    | 0.0243445 | 3.1211413    | 0.0978553 |
| 15D07419            | 14.7 % | 0.0127899    | 0.0003246 | 0.0102367    | 0.0283440 | 0.0669540    | 0.0271857 | 0.1679076    | 0.0324745 | 3.9545049    | 0.0987860 |
| 15D07420            | 16.5 % | 0.0128516    | 0.0003246 | 0.0129575    | 0.0283440 | 0.0650808    | 0.0271857 | 0.1867472    | 0.0324745 | 4.0191637    | 0.0987860 |
| 15D07421            | 17.7 % | 0.0127682    | 0.0003246 | 0.0159050    | 0.0283440 | 0.0636084    | 0.0271857 | 0.2023736    | 0.0324745 | 4.0406825    | 0.0987860 |
| 15D07423            | 18.5 % | 0.0121688    | 0.0003246 | 0.0215733    | 0.0283440 | 0.0624047    | 0.0271857 | 0.2184426    | 0.0324745 | 3.9402129    | 0.0987860 |
| 15D07424            | 19.5 % | 0.0116288    | 0.0003246 | 0.0245208    | 0.0283440 | 0.0626254    | 0.0271857 | 0.2195280    | 0.0324745 | 3.8142057    | 0.0987860 |
| 15D07425            | 20.5 % | 0.0109325    | 0.0003246 | 0.0274683    | 0.0283440 | 0.0634252    | 0.0271857 | 0.2156389    | 0.0324745 | 3.6377290    | 0.0987860 |
| 15D07427            | 21.7 % | 0.0090713    | 0.0003246 | 0.0333634    | 0.0283440 | 0.0667626    | 0.0271857 | 0.1929371    | 0.0324745 | 3.1333676    | 0.0987860 |
| 15D07428            | 22.8 % | 0.0079064    | 0.0003246 | 0.0363109    | 0.0283440 | 0.0693000    | 0.0271857 | 0.1741244    | 0.0324745 | 2.8054827    | 0.0987860 |



| OSU Argon Geochronology Lab |        |           |          |        |                |           |        |        |                |           |           |        |                |           |        |        |                |           |        |        |                |
|-----------------------------|--------|-----------|----------|--------|----------------|-----------|--------|--------|----------------|-----------|-----------|--------|----------------|-----------|--------|--------|----------------|-----------|--------|--------|----------------|
| Intercept Values            |        | 36Ar [fA] | 1σ       | r2     |                | 37Ar [fA] | 1σ     | r2     |                | 38Ar [fA] | 1σ        | r2     |                | 39Ar [fA] | 1σ     | r2     |                | 40Ar [fA] | 1σ     | r2     |                |
| 15D07375                    | 1.9 %  | 0.548888  | 0.001804 | 0.7803 | EXP 150 of 150 | 1.1960    | 0.0269 | 0.0157 | EXP 150 of 150 | 0.3438784 | 0.0247297 | 0.0027 | EXP 150 of 150 | 27.6646   | 0.0265 | 0.9775 | EXP 150 of 150 | 195.0273  | 0.0417 | 0.9092 | EXP 150 of 150 |
| 15D07376                    | 2.0 %  | 0.520311  | 0.001771 | 0.7481 | EXP 150 of 150 | 1.3922    | 0.0305 | 0.0407 | EXP 150 of 150 | 0.3989077 | 0.0289324 | 0.0109 | EXP 150 of 150 | 30.4700   | 0.0286 | 0.9776 | EXP 150 of 150 | 188.0462  | 0.0448 | 0.9037 | EXP 150 of 150 |
| 15D07378                    | 2.1 %  | 0.453181  | 0.001576 | 0.7009 | EXP 150 of 150 | 1.3778    | 0.0316 | 0.0685 | EXP 150 of 150 | 0.4040464 | 0.0267418 | 0.0702 | EXP 150 of 150 | 28.8568   | 0.0282 | 0.9770 | EXP 150 of 150 | 166.3140  | 0.0426 | 0.8874 | EXP 150 of 150 |
| 15D07379                    | 2.2 %  | 0.435818  | 0.001483 | 0.7332 | EXP 150 of 150 | 1.4079    | 0.0285 | 0.0524 | EXP 150 of 150 | 0.3307369 | 0.0268339 | 0.0106 | EXP 150 of 150 | 30.3631   | 0.0279 | 0.9797 | EXP 150 of 150 | 159.8923  | 0.0412 | 0.8528 | EXP 150 of 150 |
| 15D07380                    | 2.3 %  | 0.361623  | 0.001251 | 0.6460 | EXP 150 of 150 | 1.2395    | 0.0282 | 0.0222 | EXP 150 of 150 | 0.2957530 | 0.0257158 | 0.0007 | EXP 150 of 150 | 27.1873   | 0.0258 | 0.9786 | EXP 150 of 150 | 135.1140  | 0.0399 | 0.0014 | EXP 150 of 150 |
| 15D07382                    | 2.4 %  | 0.390766  | 0.001513 | 0.6193 | EXP 150 of 150 | 1.6303    | 0.0310 | 0.1465 | EXP 150 of 150 | 0.4177692 | 0.0267342 | 0.0196 | EXP 150 of 150 | 32.9242   | 0.0302 | 0.9804 | EXP 150 of 150 | 149.3714  | 0.0387 | 0.8858 | EXP 150 of 150 |
| 15D07383                    | 2.5 %  | 0.360275  | 0.001410 | 0.6765 | EXP 150 of 150 | 1.5886    | 0.0287 | 0.1178 | EXP 150 of 150 | 0.3689965 | 0.0270324 | 0.0029 | EXP 150 of 150 | 32.5012   | 0.0291 | 0.9818 | EXP 150 of 150 | 137.7113  | 0.0374 | 0.7446 | EXP 150 of 150 |
| 15D07384                    | 2.6 %  | 0.357955  | 0.001592 | 0.5938 | EXP 150 of 150 | 1.6869    | 0.0290 | 0.1074 | EXP 149 of 150 | 0.3735162 | 0.0252842 | 0.0012 | EXP 150 of 150 | 35.0388   | 0.0272 | 0.9853 | EXP 150 of 150 | 138.8647  | 0.0340 | 0.8251 | EXP 150 of 150 |
| 15D07387                    | 2.7 %  | 0.326609  | 0.001314 | 0.5987 | EXP 150 of 150 | 1.5536    | 0.0275 | 0.0632 | EXP 150 of 150 | 0.4009349 | 0.0283203 | 0.0021 | EXP 150 of 150 | 32.8470   | 0.0262 | 0.9850 | EXP 150 of 150 | 128.5143  | 0.0411 | 0.7511 | EXP 150 of 150 |
| 15D07388                    | 2.8 %  | 0.321979  | 0.001324 | 0.6431 | EXP 150 of 150 | 1.8015    | 0.0340 | 0.0649 | EXP 150 of 150 | 0.4328037 | 0.0275135 | 0.0039 | EXP 150 of 150 | 37.4903   | 0.0273 | 0.9872 | EXP 150 of 150 | 130.6198  | 0.0379 | 0.8097 | EXP 149 of 150 |
| 15D07389                    | 2.9 %  | 0.273756  | 0.001262 | 0.5284 | EXP 150 of 150 | 1.7008    | 0.0279 | 0.1351 | EXP 150 of 150 | 0.3708617 | 0.0260536 | 0.0004 | EXP 150 of 150 | 35.3731   | 0.0277 | 0.9850 | EXP 150 of 150 | 113.9266  | 0.0349 | 0.0646 | EXP 150 of 150 |
| 15D07391                    | 3.0 %  | 0.279342  | 0.001252 | 0.5684 | EXP 150 of 150 | 1.9483    | 0.0307 | 0.1019 | EXP 150 of 150 | 0.5418096 | 0.0244079 | 0.0816 | EXP 150 of 150 | 40.4610   | 0.0273 | 0.9896 | EXP 150 of 150 | 119.4134  | 0.0391 | 0.6431 | EXP 150 of 150 |
| 15D07392                    | 3.2 %  | 0.265145  | 0.001370 | 0.4079 | EXP 135 of 135 | 2.0457    | 0.0347 | 0.0829 | EXP 135 of 135 | 0.4943289 | 0.0296389 | 0.0213 | EXP 135 of 135 | 43.3520   | 0.0292 | 0.9895 | EXP 135 of 135 | 117.0548  | 0.0418 | 0.4830 | EXP 135 of 135 |
| 15D07393                    | 3.4 %  | 0.249039  | 0.001121 | 0.4558 | EXP 150 of 150 | 2.0797    | 0.0337 | 0.1276 | EXP 150 of 150 | 0.4879446 | 0.0285408 | 0.0032 | EXP 150 of 150 | 44.3303   | 0.0279 | 0.9905 | EXP 150 of 150 | 112.7182  | 0.0365 | 0.2805 | EXP 150 of 150 |
| 15D07395                    | 3.6 %  | 0.278724  | 0.001236 | 0.5307 | EXP 149 of 150 | 2.6694    | 0.0293 | 0.2016 | EXP 150 of 150 | 0.6279893 | 0.0262755 | 0.0029 | EXP 150 of 150 | 57.3710   | 0.0319 | 0.9927 | EXP 150 of 150 | 132.4087  | 0.0354 | 0.9280 | EXP 150 of 150 |
| 15D07396                    | 3.8 %  | 0.211987  | 0.001153 | 0.4234 | EXP 150 of 150 | 2.2394    | 0.0305 | 0.1506 | EXP 150 of 150 | 0.5567491 | 0.0258804 | 0.0052 | EXP 150 of 150 | 49.6388   | 0.0297 | 0.9916 | EXP 150 of 150 | 105.4401  | 0.0357 | 0.0004 | EXP 150 of 150 |
| 15D07397                    | 4.0 %  | 0.163457  | 0.000981 | 0.2273 | EXP 150 of 150 | 1.6957    | 0.0260 | 0.1383 | EXP 150 of 150 | 0.4226438 | 0.0262323 | 0.0154 | EXP 150 of 150 | 38.9842   | 0.0311 | 0.9848 | EXP 150 of 150 | 81.8097   | 0.0356 | 0.8946 | EXP 150 of 150 |
| 15D07399                    | 4.3 %  | 0.168420  | 0.000982 | 0.1694 | EXP 150 of 150 | 2.1075    | 0.0305 | 0.1566 | EXP 150 of 150 | 0.5260226 | 0.0258761 | 0.0210 | EXP 150 of 150 | 48.0515   | 0.0312 | 0.9904 | EXP 150 of 150 | 91.1723   | 0.0361 | 0.6372 | EXP 150 of 150 |
| 15D07400                    | 4.6 %  | 0.320513  | 0.001452 | 0.5321 | EXP 150 of 150 | 4.6166    | 0.0301 | 0.3119 | EXP 150 of 150 | 1.1741721 | 0.0242642 | 0.0276 | EXP 150 of 150 | 102.7137  | 0.0341 | 0.9975 | EXP 150 of 150 | 182.5377  | 0.0418 | 0.9873 | EXP 150 of 150 |
| 15D07401                    | 4.9 %  | 0.182090  | 0.001063 | 0.1918 | EXP 150 of 150 | 3.5603    | 0.0279 | 0.2256 | EXP 150 of 150 | 0.9913370 | 0.0278490 | 0.0854 | EXP 150 of 150 | 83.4653   | 0.0293 | 0.9971 | EXP 150 of 150 | 123.4039  | 0.0394 | 0.8216 | EXP 150 of 150 |
| 15D07403                    | 5.2 %  | 0.247626  | 0.001084 | 0.4542 | EXP 150 of 150 | 5.3336    | 0.0298 | 0.5040 | EXP 150 of 150 | 1.3997955 | 0.0287352 | 0.0306 | EXP 150 of 150 | 121.9266  | 0.0337 | 0.9982 | EXP 150 of 150 | 175.3415  | 0.0360 | 0.9876 | EXP 149 of 150 |
| 15D07404                    | 5.5 %  | 0.190339  | 0.001022 | 0.0843 | EXP 150 of 150 | 6.5478    | 0.0310 | 0.5834 | EXP 150 of 150 | 1.7562168 | 0.0257458 | 0.1140 | EXP 150 of 150 | 151.2748  | 0.0359 | 0.9987 | EXP 150 of 150 | 180.6552  | 0.0395 | 0.9855 | EXP 150 of 150 |
| 15D07405                    | 5.8 %  | 0.103013  | 0.000804 | 0.0021 | EXP 150 of 150 | 3.9132    | 0.0305 | 0.2375 | EXP 149 of 150 | 1.1046031 | 0.0251062 | 0.0364 | EXP 150 of 150 | 99.5697   | 0.0334 | 0.9975 | EXP 150 of 150 | 111.4286  | 0.0360 | 0.3141 | EXP 150 of 150 |
| 15D07407                    | 6.1 %  | 0.241463  | 0.001161 | 0.3234 | EXP 149 of 150 | 7.2564    | 0.0288 | 0.6965 | EXP 150 of 150 | 1.9850267 | 0.0260537 | 0.1397 | EXP 150 of 150 | 169.2888  | 0.0367 | 0.9989 | EXP 150 of 150 | 210.9307  | 0.0430 | 0.9921 | EXP 150 of 150 |
| 15D07408                    | 6.5 %  | 0.198717  | 0.001089 | 0.0721 | EXP 150 of 150 | 10.3178   | 0.0288 | 0.7875 | EXP 150 of 150 | 2.8713740 | 0.0265419 | 0.2820 | EXP 150 of 150 | 241.3223  | 0.0387 | 0.9994 | EXP 150 of 150 | 254.3498  | 0.0439 | 0.9955 | EXP 150 of 150 |
| 15D07409                    | 7.0 %  | 0.153435  | 0.000991 | 0.0652 | EXP 150 of 150 | 8.4165    | 0.0262 | 0.7751 | EXP 150 of 150 | 2.3724545 | 0.0248232 | 0.2285 | EXP 150 of 150 | 199.3541  | 0.0346 | 0.9993 | EXP 150 of 150 | 205.5344  | 0.0455 | 0.9886 | EXP 150 of 150 |
| 15D07411                    | 7.6 %  | 0.159202  | 0.000925 | 0.0276 | EXP 150 of 150 | 9.0024    | 0.0316 | 0.7060 | EXP 150 of 150 | 2.4955005 | 0.0270781 | 0.2269 | EXP 150 of 150 | 213.1339  | 0.0407 | 0.9992 | EXP 150 of 150 | 219.1133  | 0.0389 | 0.9942 | EXP 150 of 150 |
| 15D07412                    | 8.4 %  | 0.215564  | 0.001130 | 0.0949 | EXP 150 of 150 | 12.3599   | 0.0308 | 0.8316 | EXP 150 of 150 | 3.4454195 | 0.0256526 | 0.4150 | EXP 149 of 150 | 290.7086  | 0.0424 | 0.9995 | EXP 150 of 150 | 298.3459  | 0.0438 | 0.9972 | EXP 150 of 150 |
| 15D07413                    | 9.4 %  | 0.340180  | 0.001259 | 0.5010 | EXP 150 of 150 | 15.7935   | 0.0310 | 0.8980 | EXP 150 of 150 | 4.2752214 | 0.0273748 | 0.4944 | EXP 150 of 150 | 354.2095  | 0.0509 | 0.9995 | EXP 150 of 150 | 385.8574  | 0.0506 | 0.9983 | EXP 150 of 150 |
| 15D07415                    | 10.5 % | 0.405512  | 0.001451 | 0.5647 | EXP 150 of 150 | 16.1900   | 0.0302 | 0.9005 | EXP 150 of 150 | 4.0121784 | 0.0261881 | 0.4294 | EXP 149 of 150 | 332.0042  | 0.0514 | 0.9995 | EXP 150 of 150 | 389.7309  | 0.0566 | 0.9980 | EXP 150 of 150 |
| 15D07416                    | 11.7 % | 0.455948  | 0.001462 | 0.7256 | EXP 150 of 150 | 16.0643   | 0.0302 | 0.8967 | EXP 150 of 150 | 3.4288969 | 0.0262557 | 0.3464 | EXP 150 of 150 | 286.5506  | 0.0486 | 0.9993 | EXP 150 of 150 | 367.1545  | 0.0526 | 0.9979 | EXP 150 of 150 |
| 15D07417                    | 13.1 % | 0.955382  | 0.002380 | 0.8529 | EXP 150 of 150 | 28.2376   | 0.0330 | 0.9567 | EXP 150 of 150 | 4.7812370 | 0.0250182 | 0.5162 | EXP 150 of 150 | 383.7444  | 0.0507 | 0.9996 | EXP 150 of 150 | 597.5205  | 0.0634 | 0.9992 | EXP 150 of 150 |
| 15D07419                    | 14.7 % | 1.455874  | 0.003007 | 0.9041 | EXP 150 of 150 | 45.1525   | 0.0315 | 0.9846 | EXP 150 of 150 | 5.5861590 | 0.0270062 | 0.5951 | EXP 150 of 150 | 431.2882  | 0.0484 | 0.9997 | EXP 150 of 150 | 791.3101  | 0.0619 | 0.9996 | EXP 150 of 150 |
| 15D07420                    | 16.5 % | 1.878825  | 0.003051 | 0.9407 | EXP 150 of 150 | 70.6931   | 0.0358 | 0.9921 | EXP 150 of 150 | 6.1017582 | 0.0261255 | 0.5818 | EXP 150 of 150 | 471.2616  | 0.0534 | 0.9997 | EXP 150 of 150 | 945.3661  | 0.0795 | 0.9996 | EXP 150 of 150 |
| 15D07421                    | 17.7 % | 1.417705  | 0.002651 | 0.9179 | EXP 150 of 150 | 48.8971   | 0.0326 | 0.9865 | EXP 149 of 150 | 4.1012348 | 0.0268667 | 0.4342 | EXP 150 of 150 | 321.1876  | 0.0431 | 0.9996 | EXP 150 of 150 | 689.8549  | 0.0615 | 0.9994 | EXP 150 of 150 |
| 15D07423                    | 18.5 % | 1.020099  | 0.002421 | 0.8749 | EXP 150 of 150 | 26.1337   | 0.0320 | 0.9536 | EXP 150 of 150 | 2.7045622 | 0.0242103 | 0.3539 | EXP 150 of 150 | 210.4586  | 0.0421 | 0.9991 | EXP 150 of 150 | 479.2464  | 0.0534 | 0.9990 | EXP 150 of 150 |
| 15D07424                    | 19.5 % | 0.738167  | 0.002060 | 0.8257 | EXP 150 of 150 | 17.6150   | 0.0316 | 0.9050 | EXP 150 of 150 | 1.7680724 | 0.0281357 | 0.0882 | EXP 150 of 150 | 142.5743  | 0.0368 | 0.9984 | EXP 150 of 150 | 339.3137  | 0.0528 | 0.9975 | EXP 150 of 150 |
| 15D07425                    | 20.5 % | 0.590751  | 0.001843 | 0.7676 | EXP 150 of 150 | 15.9295   | 0.0313 | 0.8851 | EXP 150 of 150 | 1.4269524 |           |        |                |           |        |        |                |           |        |        |                |







[illegible]



| Irradiation<br>Constants | Table 1. Irradiation constants for $^{60}\text{Co}$ and $^{137}\text{Cs}$ sources |             |          |             |          |             |          |             |           |             |           |             |           |             |          |             |          |             |           |             |      |             |      |             |       |             |   |  |
|--------------------------|-----------------------------------------------------------------------------------|-------------|----------|-------------|----------|-------------|----------|-------------|-----------|-------------|-----------|-------------|-----------|-------------|----------|-------------|----------|-------------|-----------|-------------|------|-------------|------|-------------|-------|-------------|---|--|
|                          | 40/36(a)                                                                          | %1 $\sigma$ | 40/36(c) | %1 $\sigma$ | 38/36(a) | %1 $\sigma$ | 38/36(c) | %1 $\sigma$ | 39/37(ca) | %1 $\sigma$ | 38/37(ca) | %1 $\sigma$ | 36/37(ca) | %1 $\sigma$ | 40/39(k) | %1 $\sigma$ | 38/39(k) | %1 $\sigma$ | 36/38(cl) | %1 $\sigma$ | K/Ca | %1 $\sigma$ | K/Cl | %1 $\sigma$ | Ca/Cl | %1 $\sigma$ |   |  |
| 15D07375                 | 1.9 %                                                                             | 295.5       | 0        | 0.018       | 35       | 0.1869      | 0        | 1.493       | 3         | 0.000673    | 0         | 0.0000139   | 0         | 0.000264    | 0        | 0.00101     | 0        | 0.01138     | 0         | 0           | 0    | 0.43        | 0    | 0           | 0     | 0           | 0 |  |
| 15D07376                 | 2.0 %                                                                             | 295.5       | 0        | 0.018       | 35       | 0.1869      | 0        | 1.493       | 3         | 0.000673    | 0         | 0.0000139   | 0         | 0.000264    | 0        | 0.00101     | 0        | 0.01138     | 0         | 0           | 0    | 0.43        | 0    | 0           | 0     | 0           | 0 |  |
| 15D07378                 | 2.1 %                                                                             | 295.5       | 0        | 0.018       | 35       | 0.1869      | 0        | 1.493       | 3         | 0.000673    | 0         | 0.0000139   | 0         | 0.000264    | 0        | 0.00101     | 0        | 0.01138     | 0         | 0           | 0    | 0.43        | 0    | 0           | 0     | 0           | 0 |  |
| 15D07379                 | 2.2 %                                                                             | 295.5       | 0        | 0.018       | 35       | 0.1869      | 0        | 1.493       | 3         | 0.000673    | 0         | 0.0000139   | 0         | 0.000264    | 0        | 0.00101     | 0        | 0.01138     | 0         | 0           | 0    | 0.43        | 0    | 0           | 0     | 0           | 0 |  |
| 15D07380                 | 2.3 %                                                                             | 295.5       | 0        | 0.018       | 35       | 0.1869      | 0        | 1.493       | 3         | 0.000673    | 0         | 0.0000139   | 0         | 0.000264    | 0        | 0.00101     | 0        | 0.01138     | 0         | 0           | 0    | 0.43        | 0    | 0           | 0     | 0           | 0 |  |
| 15D07382                 | 2.4 %                                                                             | 295.5       | 0        | 0.018       | 35       | 0.1869      | 0        | 1.493       | 3         | 0.000673    | 0         | 0.0000139   | 0         | 0.000264    | 0        | 0.00101     | 0        | 0.01138     | 0         | 0           | 0    | 0.43        | 0    | 0           | 0     | 0           | 0 |  |
| 15D07383                 | 2.5 %                                                                             | 295.5       | 0        | 0.018       | 35       | 0.1869      | 0        | 1.493       | 3         | 0.000673    | 0         | 0.0000139   | 0         | 0.000264    | 0        | 0.00101     | 0        | 0.01138     | 0         | 0           | 0    | 0.43        | 0    | 0           | 0     | 0           | 0 |  |
| 15D07384                 | 2.6 %                                                                             | 295.5       | 0        | 0.018       | 35       | 0.1869      | 0        | 1.493       | 3         | 0.000673    | 0         | 0.0000139   | 0         | 0.000264    | 0        | 0.00101     | 0        | 0.01138     | 0         | 0           | 0    | 0.43        | 0    | 0           | 0     | 0           | 0 |  |
| 15D07387                 | 2.7 %                                                                             | 295.5       | 0        | 0.018       | 35       | 0.1869      | 0        | 1.493       | 3         | 0.000673    | 0         | 0.0000139   | 0         | 0.000264    | 0        | 0.00101     | 0        | 0.01138     | 0         | 0.000264    | 0    | 0.43        | 0    | 0           | 0     | 0           | 0 |  |
| 15D07388                 | 2.8 %                                                                             | 295.5       | 0        | 0.018       | 35       | 0.1869      | 0        | 1.493       | 3         | 0.000673    | 0         | 0.0000139   | 0         | 0.000264    | 0        | 0.00101     | 0        | 0.01138     | 0         | 0           | 0    | 0.43        | 0    | 0           | 0     | 0           | 0 |  |
| 15D07389                 | 2.9 %                                                                             | 295.5       | 0        | 0.018       | 35       | 0.1869      | 0        | 1.493       | 3         | 0.000673    | 0         | 0.0000139   | 0         | 0.000264    | 0        | 0.00101     | 0        | 0.01138     | 0         | 0           | 0    | 0.43        | 0    | 0           | 0     | 0           | 0 |  |
| 15D07391                 | 3.0 %                                                                             | 295.5       | 0        | 0.018       | 35       | 0.1869      | 0        | 1.493       | 3         | 0.000673    | 0         | 0.0000139   | 0         | 0.000264    | 0        | 0.00101     | 0        | 0.01138     | 0         | 0.000264    | 0    | 0.43        | 0    | 0           | 0     | 0           | 0 |  |
| 15D07392                 | 3.2 %                                                                             | 295.5       | 0        | 0.018       | 35       | 0.1869      | 0        | 1.493       | 3         | 0.000673    | 0         | 0.0000139   | 0         | 0.000264    | 0        | 0.00101     | 0        | 0.01138     | 0         | 0           | 0    | 0.43        | 0    | 0           | 0     | 0           | 0 |  |
| 15D07393                 | 3.4 %                                                                             | 295.5       | 0        | 0.018       | 35       | 0.1869      | 0        | 1.493       | 3         | 0.000673    | 0         | 0.0000139   | 0         | 0.000264    | 0        | 0.00101     | 0        | 0.01138     | 0         | 0           | 0    | 0.43        | 0    | 0           | 0     | 0           | 0 |  |
| 15D07395                 | 3.6 %                                                                             | 295.5       | 0        | 0.018       | 35       | 0.1869      | 0        | 1.493       | 3         | 0.000673    | 0         | 0.0000139   | 0         | 0.000264    | 0        | 0.00101     | 0        | 0.01138     | 0         | 0           | 0    | 0.43        | 0    | 0           | 0     | 0           | 0 |  |
| 15D07396                 | 3.8 %                                                                             | 295.5       | 0        | 0.018       | 35       | 0.1869      | 0        | 1.493       | 3         | 0.000673    | 0         | 0.0000139   | 0         | 0.000264    | 0        | 0.00101     | 0        | 0.01138     | 0         | 0           | 0    | 0.43        | 0    | 0           | 0     | 0           | 0 |  |
| 15D07397                 | 4.0 %                                                                             | 295.5       | 0        | 0.018       | 35       | 0.1869      | 0        | 1.493       | 3         | 0.000673    | 0         | 0.0000139   | 0         | 0.000264    | 0        | 0.00101     | 0        | 0.01138     | 0         | 0           | 0    | 0.43        | 0    | 0           | 0     | 0           | 0 |  |
| 15D07399                 | 4.3 %                                                                             | 295.5       | 0        | 0.018       | 35       | 0.1869      | 0        | 1.493       | 3         | 0.000673    | 0         | 0.0000139   | 0         | 0.000264    | 0        | 0.00101     | 0        | 0.01138     | 0         | 0           | 0    | 0.43        | 0    | 0           | 0     | 0           | 0 |  |
| 15D07400                 | 4.6 %                                                                             | 295.5       | 0        | 0.018       | 35       | 0.1869      | 0        | 1.493       | 3         | 0.000673    | 0         | 0.0000139   | 0         | 0.000264    | 0        | 0.00101     | 0        | 0.01138     | 0         | 0.000264    | 0    | 0.43        | 0    | 0           | 0     | 0           | 0 |  |
| 15D07401                 | 4.9 %                                                                             | 295.5       | 0        | 0.018       | 35       | 0.1869      | 0        | 1.493       | 3         | 0.000673    | 0         | 0.0000139   | 0         | 0.000264    | 0        | 0.00101     | 0        | 0.01138     | 0         | 0           | 0    | 0.43        | 0    | 0           | 0     | 0           | 0 |  |
| 15D07403                 | 5.2 %                                                                             | 295.5       | 0        | 0.018       | 35       | 0.1869      | 0        | 1.493       | 3         | 0.000673    | 0         | 0.0000139   | 0         | 0.000264    | 0        | 0.00101     | 0        | 0.01138     | 0         | 0           | 0    | 0.43        | 0    | 0           | 0     | 0           | 0 |  |
| 15D07404                 | 5.5 %                                                                             | 295.5       | 0        | 0.018       | 35       | 0.1869      | 0        | 1.493       | 3         | 0.000673    | 0         | 0.0000139   | 0         | 0.000264    | 0        | 0.00101     | 0        | 0.01138     | 0         | 0.000264    | 0    | 0.43        | 0    | 0           | 0     | 0           | 0 |  |
| 15D07405                 | 5.8 %                                                                             | 295.5       | 0        | 0.018       | 35       | 0.1869      | 0        | 1.493       | 3         | 0.000673    | 0         | 0.0000139   | 0         | 0.000264    | 0        | 0.00101     | 0        | 0.01138     | 0         | 0           | 0    | 0.43        | 0    | 0           | 0     | 0           | 0 |  |
| 15D07407                 | 6.1 %                                                                             | 295.5       | 0        | 0.018       | 35       | 0.1869      | 0        | 1.493       | 3         | 0.000673    | 0         | 0.0000139   | 0         | 0.000264    | 0        | 0.00101     | 0        | 0.01138     | 0         | 0           | 0    | 0.43        | 0    | 0           | 0     | 0           | 0 |  |
| 15D07408                 | 6.5 %                                                                             | 295.5       | 0        | 0.018       | 35       | 0.1869      | 0        | 1.493       | 3         | 0.000673    | 0         | 0.0000139   | 0         | 0.000264    | 0        | 0.00101     | 0        | 0.01138     | 0         | 0           | 0    | 0.43        | 0    | 0           | 0     | 0           | 0 |  |
| 15D07409                 | 7.0 %                                                                             | 295.5       | 0        | 0.018       | 35       | 0.1869      | 0        | 1.493       | 3         | 0.000673    | 0         | 0.0000139   | 0         | 0.000264    | 0        | 0.00101     | 0        | 0.01138     | 0         | 0           | 0    | 0.43        | 0    | 0           | 0     | 0           | 0 |  |
| 15D07411                 | 7.6 %                                                                             | 295.5       | 0        | 0.018       | 35       | 0.1869      | 0        | 1.493       | 3         | 0.000673    | 0         | 0.0000139   | 0         | 0.000264    | 0        | 0.00101     | 0        | 0.01138     | 0         | 0           | 0    | 0.43        | 0    | 0           | 0     | 0           | 0 |  |
| 15D07412                 | 8.4 %                                                                             | 295.5       | 0        | 0.018       | 35       | 0.1869      | 0        | 1.493       | 3         | 0.000673    | 0         | 0.0000139   | 0         | 0.000264    | 0        | 0.00101     | 0        | 0.01138     | 0         | 0           | 0    | 0.43        | 0    | 0           | 0     | 0           | 0 |  |
| 15D07413                 | 9.4 %                                                                             | 295.5       | 0        | 0.018       | 35       | 0.1869      | 0        | 1.493       | 3         | 0.000673    | 0         | 0.0000139   | 0         | 0.000264    | 0        | 0.00101     | 0        | 0.01138     | 0         | 0.000264    | 0    | 0.43        | 0    | 0           | 0     | 0           | 0 |  |
| 15D07415                 | 10.5 %                                                                            | 295.5       | 0        | 0.018       | 35       | 0.1869      | 0        | 1.493       | 3         | 0.000673    | 0         | 0.0000139   | 0         | 0.000264    | 0        | 0.00101     | 0        | 0.01138     | 0         | 0           | 0    | 0.43        | 0    | 0           | 0     | 0           | 0 |  |
| 15D07416                 | 11.7 %                                                                            | 295.5       | 0        | 0.018       | 35       | 0.1869      | 0        | 1.493       | 3         | 0.000673    | 0         | 0.0000139   | 0         | 0.000264    | 0        | 0.00101     | 0        | 0.01138     | 0         | 0           | 0    | 0.43        | 0    | 0           | 0     | 0           | 0 |  |
| 15D07417                 | 13.1 %                                                                            | 295.5       | 0        | 0.018       | 35       | 0.1869      | 0        | 1.493       | 3         | 0.000673    | 0         | 0.0000139   | 0         | 0.000264    | 0        | 0.00101     | 0        | 0.01138     | 0         | 0.000264    | 0    | 0.43        | 0    | 0           | 0     | 0           | 0 |  |
| 15D07419                 | 14.7 %                                                                            | 295.5       | 0        | 0.018       | 35       | 0.1869      | 0        | 1.493       | 3         | 0.000673    | 0         | 0.0000139   | 0         | 0.000264    | 0        | 0.00101     | 0        | 0.01138     | 0         | 0           | 0    | 0.43        | 0    | 0           | 0     | 0           | 0 |  |
| 15D07420                 | 16.5 %                                                                            | 295.5       | 0        | 0.018       | 35       | 0.1869      | 0        | 1.493       | 3         | 0.000673    | 0         | 0.0000139   | 0         | 0.000264    | 0        | 0.00101     | 0        | 0.01138     | 0         | 0           | 0    | 0.43        | 0    | 0           | 0     | 0           | 0 |  |
| 15D07421                 | 17.7 %                                                                            | 295.5       | 0        | 0.018       | 35       | 0.1869      | 0        | 1.493       | 3         | 0.000673    | 0         | 0.0000139   | 0         | 0.000264    | 0        | 0.00101     | 0        | 0.01138     | 0         | 0.000264    | 0    | 0.43        | 0    | 0           | 0     | 0           | 0 |  |
| 15D07423                 | 18.5 %                                                                            | 295.5       | 0        | 0.018       | 35       | 0.1869      | 0        | 1.493       | 3         | 0.000673    | 0         | 0.0000139   | 0         | 0.000264    | 0        | 0.00101     | 0        | 0.01138     | 0         | 0           | 0    | 0.43        | 0    | 0           | 0     | 0           | 0 |  |
| 15D07424                 | 19.5 %                                                                            | 295.5       | 0        | 0.018       | 35       | 0.1869      | 0        | 1.493       | 3         | 0.000673    | 0         | 0.0000139   | 0         | 0.000264    | 0        | 0.00101     | 0        | 0.01138     | 0         | 0           | 0    | 0.43        | 0    | 0           | 0     | 0           | 0 |  |
| 15D07425                 | 20.5 %                                                                            | 295.5       | 0        | 0.018       | 35       | 0.1869      | 0        | 1.493       | 3         | 0.000673    | 0         | 0.0000139   | 0         | 0.000264    | 0        | 0.00101     | 0        | 0.01138     | 0         | 0           | 0    | 0.43        | 0    | 0           | 0     | 0           | 0 |  |
| 15D07427                 | 21.7 %                                                                            | 295.5       | 0        | 0.018       | 35       | 0.1869      | 0        | 1.493       | 3         | 0.000673    | 0         | 0.0000139   | 0         | 0.000264    | 0        | 0.00101     | 0        | 0.01138     | 0         | 0           | 0    | 0.43        | 0    | 0           | 0     | 0           | 0 |  |
| 15D07428                 | 22.8 %                                                                            | 295.5       | 0        | 0.018       | 35       | 0.1869      | 0        | 1.493       | 3         | 0.000673    | 0         | 0.0000139   | 0         | 0.000264    | 0        | 0.00101     | 0        | 0.01138     | 0         | 0           | 0    | 0.43        | 0    | 0           | 0     | 0           | 0 |  |



15D07374.AGE >>> 1180050-1A >>> KERGUELEN | FALLOON (14-PIL-01) PROJECT

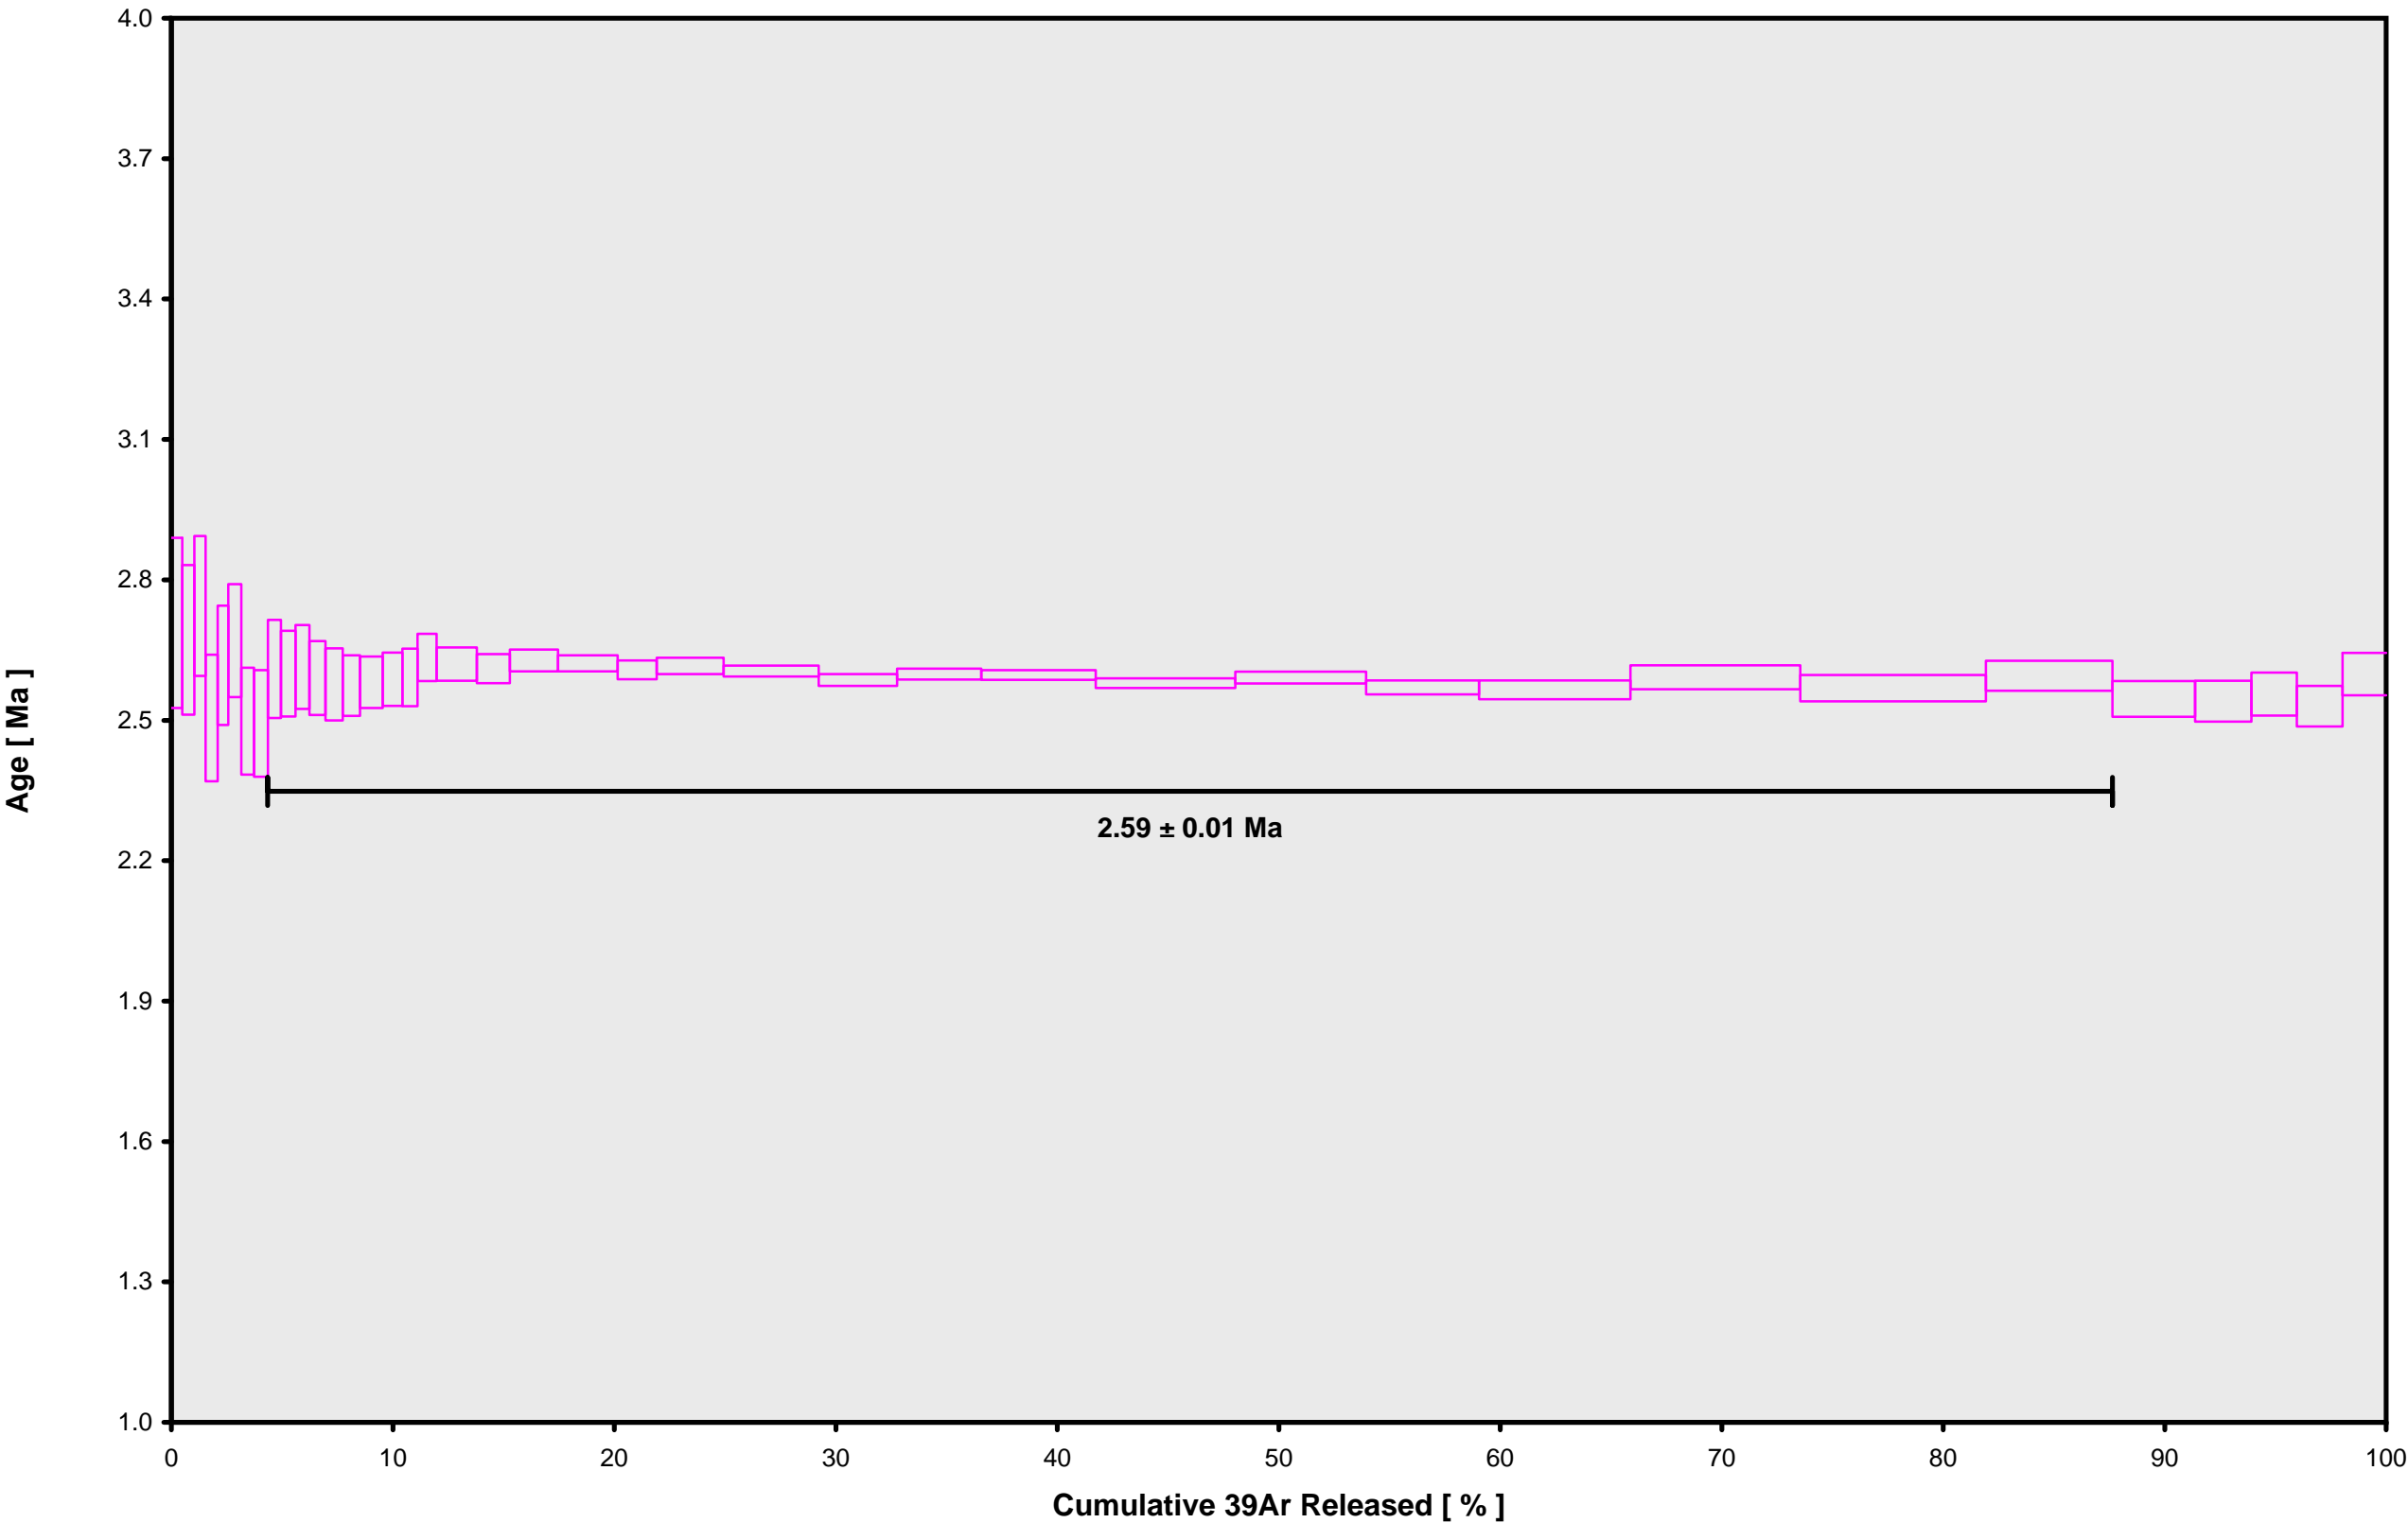

### Ar-Ages in Ma

#### WEIGHTED PLATEAU

2.59 ± 0.01

#### TOTAL FUSION

2.59 ± 0.01

#### NORMAL ISOCHRON

2.60 ± 0.01

#### INVERSE ISOCHRON

2.60 ± 0.01

#### MSWD (PROBABILITY)

2.67 (0%)

### Sample Info

Groundmass

Kerguelen Plateau

Dan Miggins

IRR = 14-OSU-07 (7B19-14)

J = 0.00179979 ± 0.00000211



15D07374.AGE >>> 1180050-1A >>> KERGUELEN | FALLOON (14-PIL-01) PROJECT

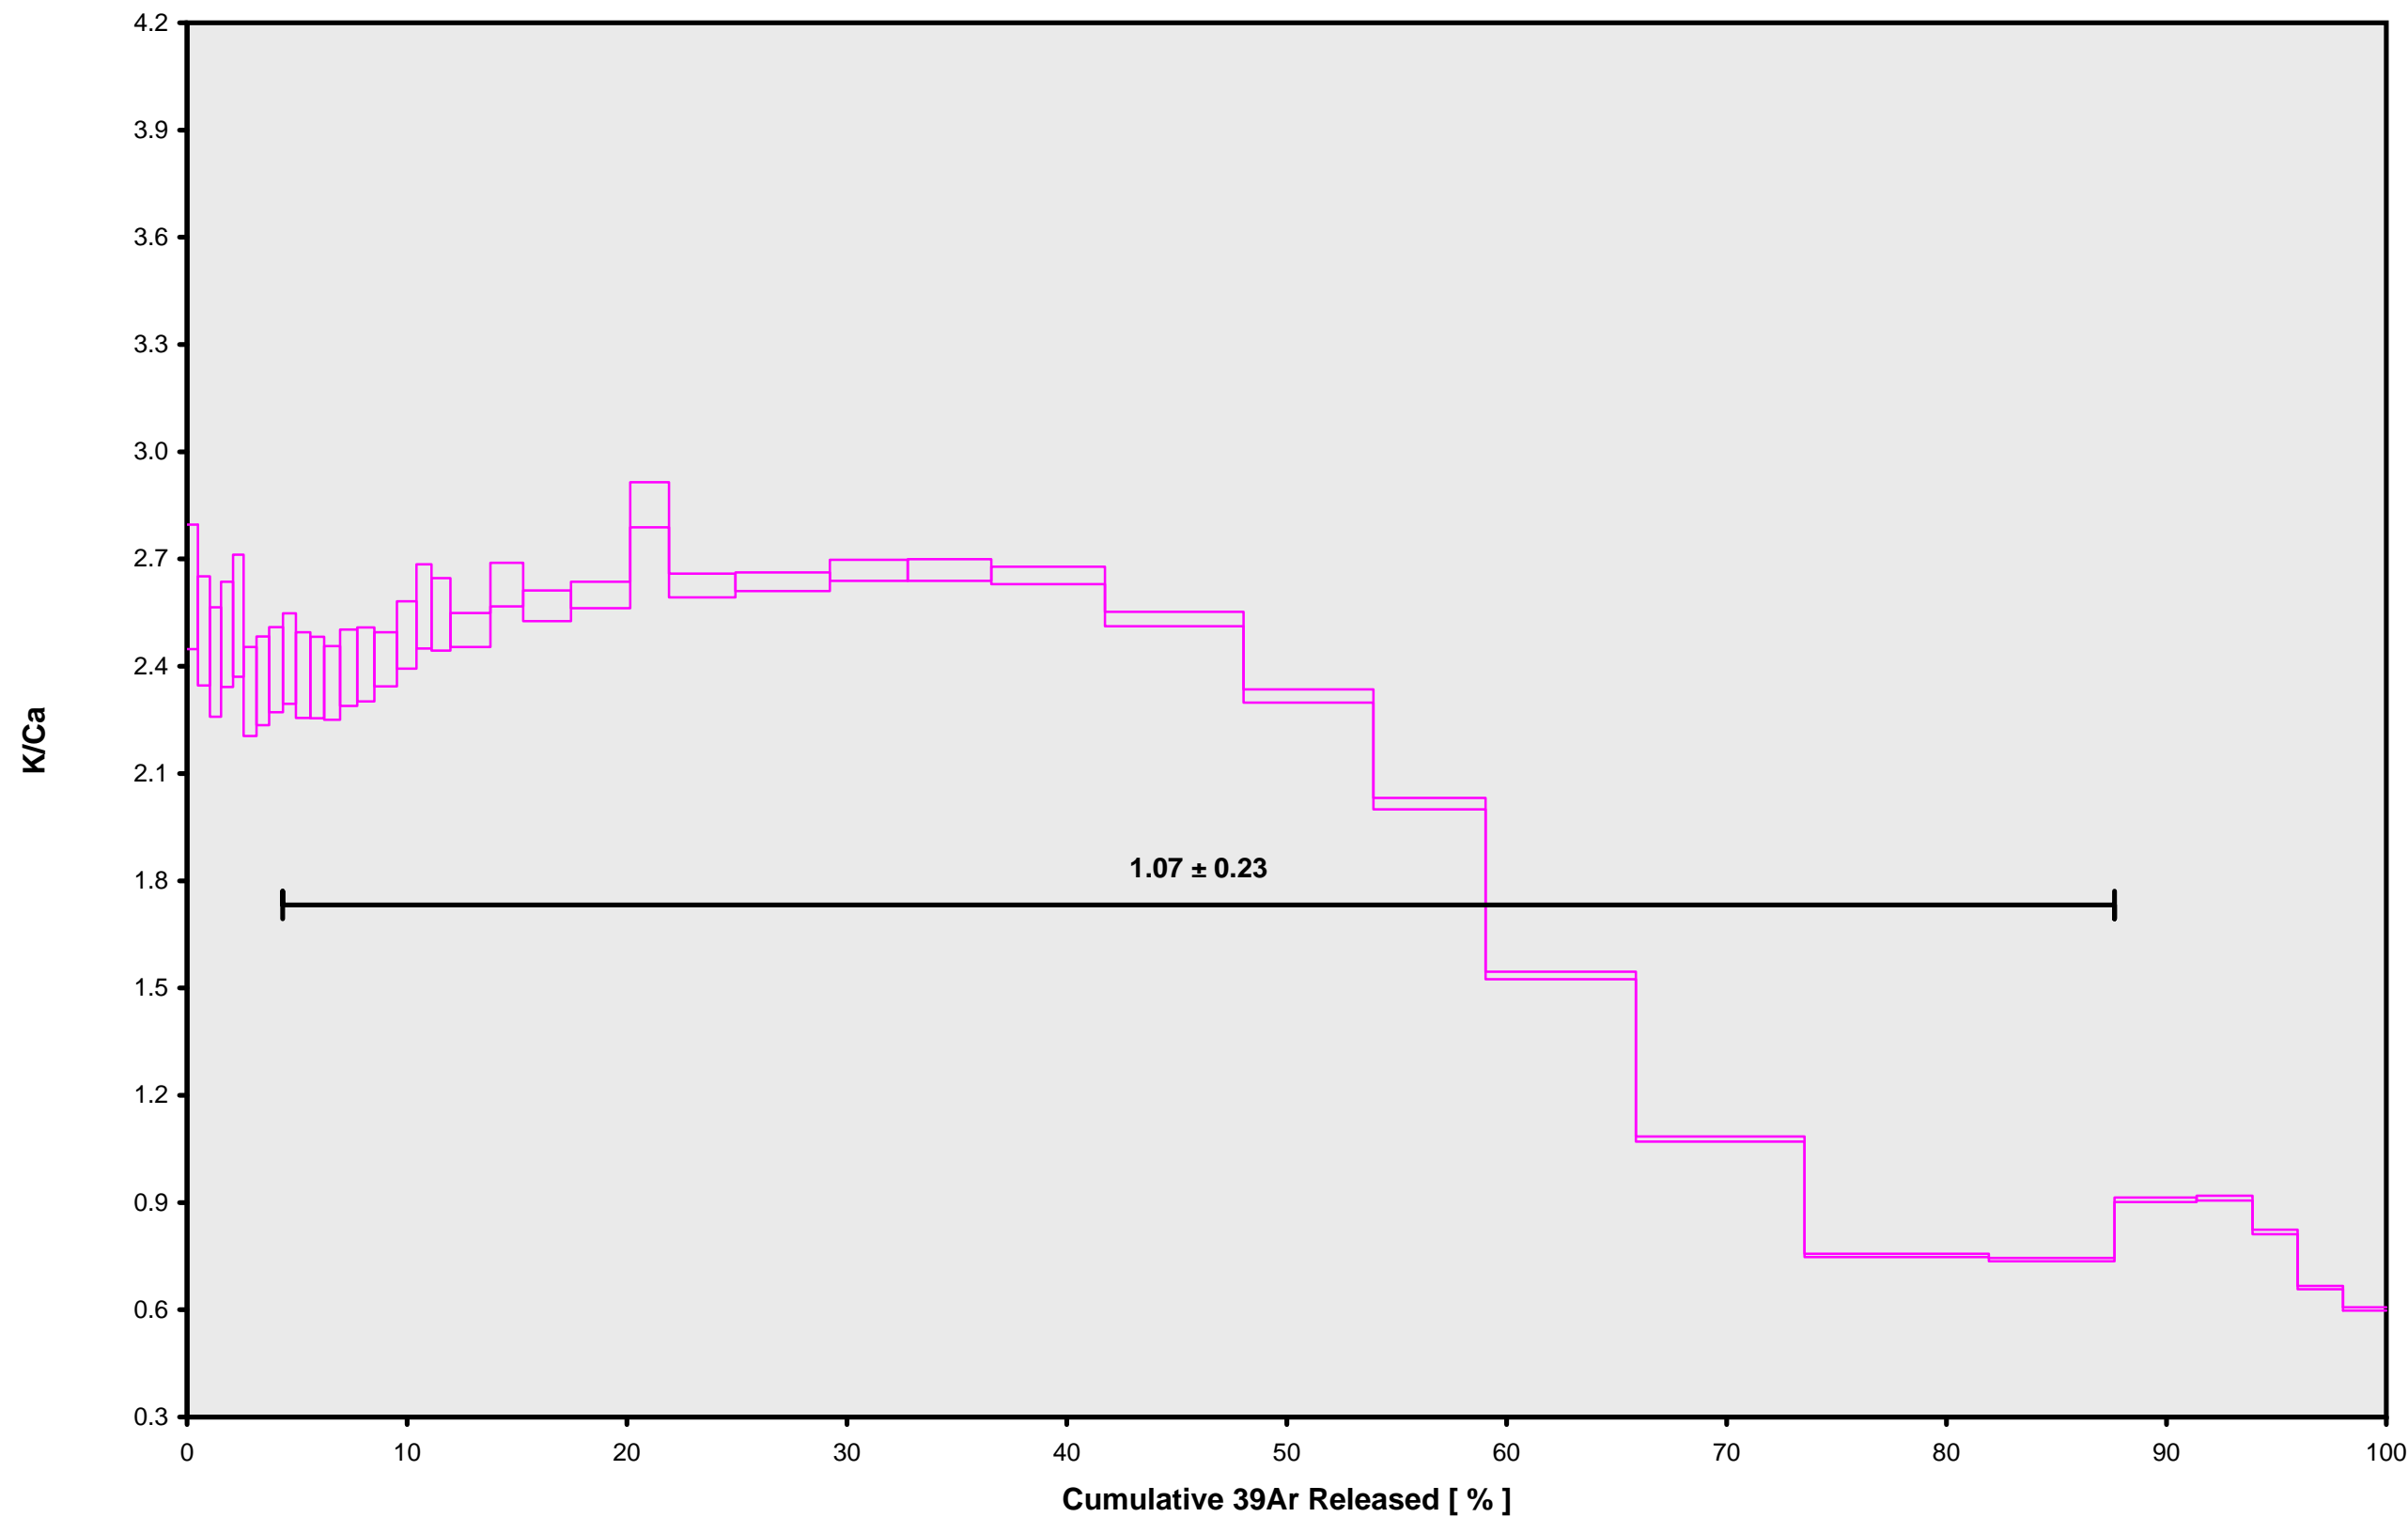

Ar-Ages in Ma

WEIGHTED PLATEAU

2.59 ± 0.01

TOTAL FUSION

2.59 ± 0.01

NORMAL ISOCHRON

2.60 ± 0.01

INVERSE ISOCHRON

2.60 ± 0.01

Sample Info

Groundmass

Kerguelen Plateau

Dan Miggins

IRR = 14-OSU-07 (7B19-14)

J = 0.00179979 ± 0.00000211



15D07374.AGE >>> 1180050-1A >>> KERGUELEN | FALLOON (14-PIL-01) PROJECT

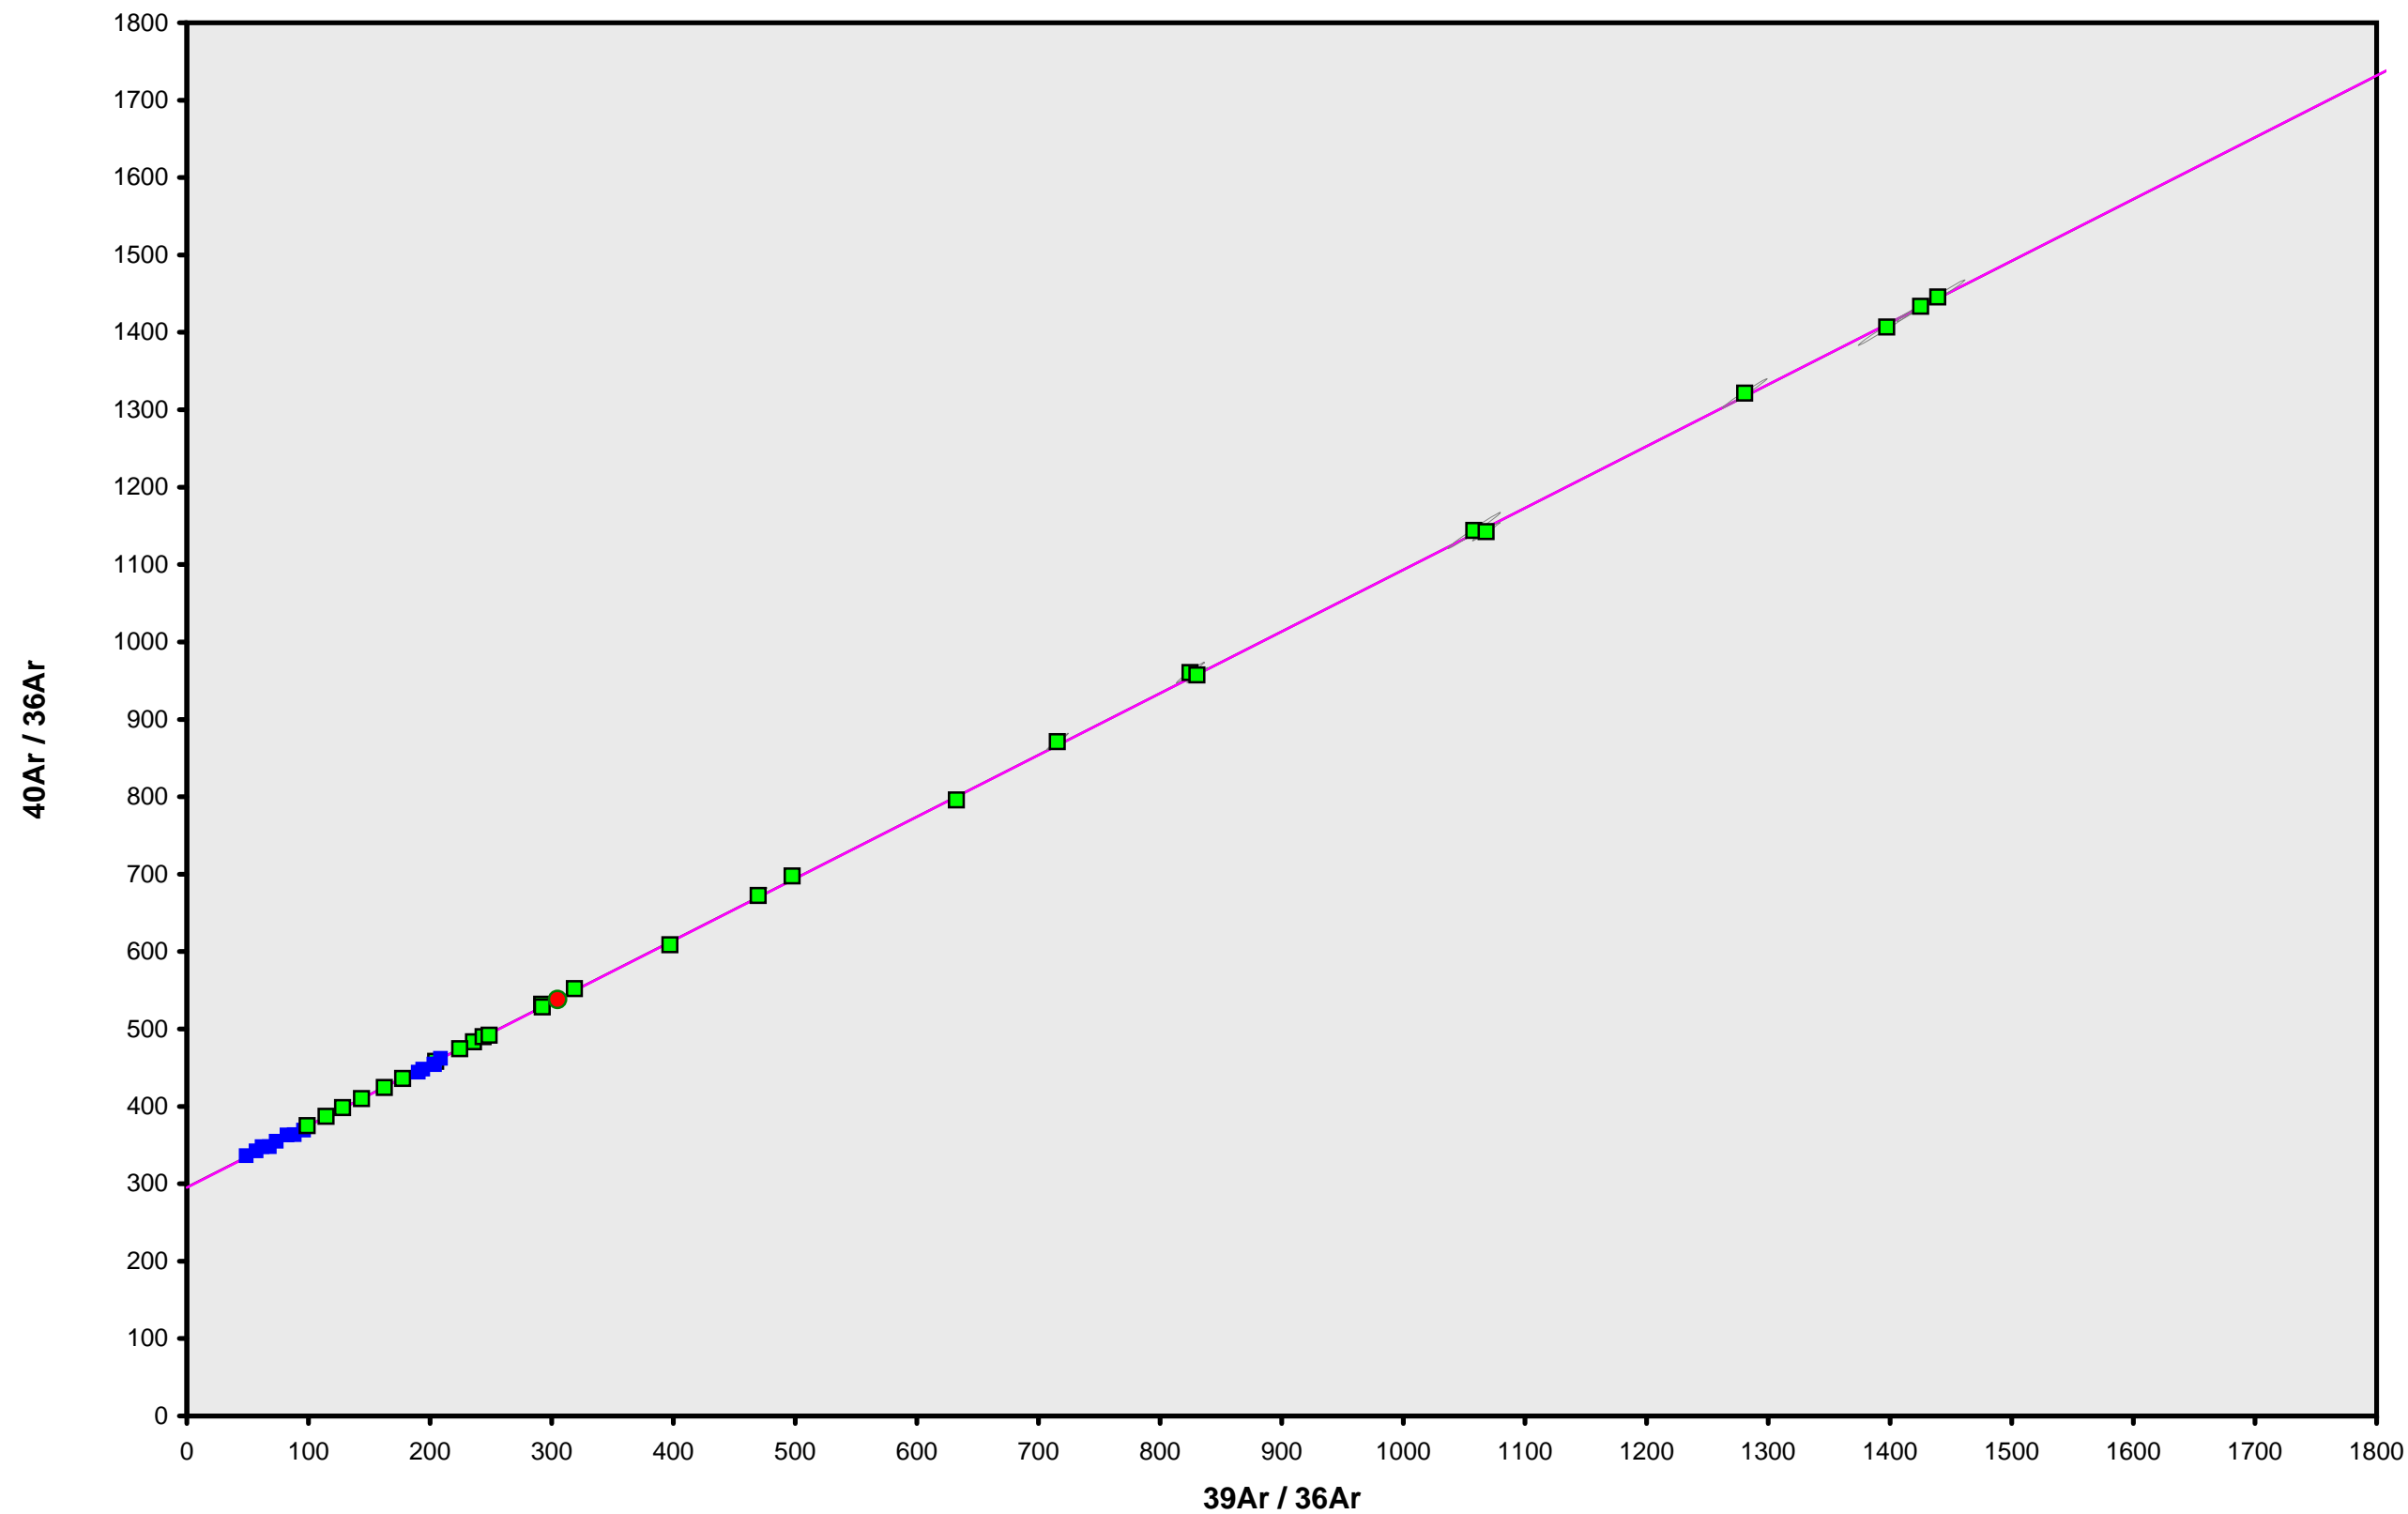

Ar-Ages in Ma

WEIGHTED PLATEAU

2.59 ± 0.01

TOTAL FUSION

2.59 ± 0.01

NORMAL ISOCHRON

2.60 ± 0.01

INVERSE ISOCHRON

2.60 ± 0.01

MSWD (PROBABILITY)

2.74 (0%)

40AR/36AR INTERCEPT

295.1 ± 1.7

Sample Info

Groundmass

Kerguelen Plateau

Dan Miggins

IRR = 14-OSU-07 (7B19-14)

J = 0.00179979 ± 0.00000211



15D07374.AGE >>> 1180050-1A >>> KERGUELEN | FALLOON (14-PIL-01) PROJECT

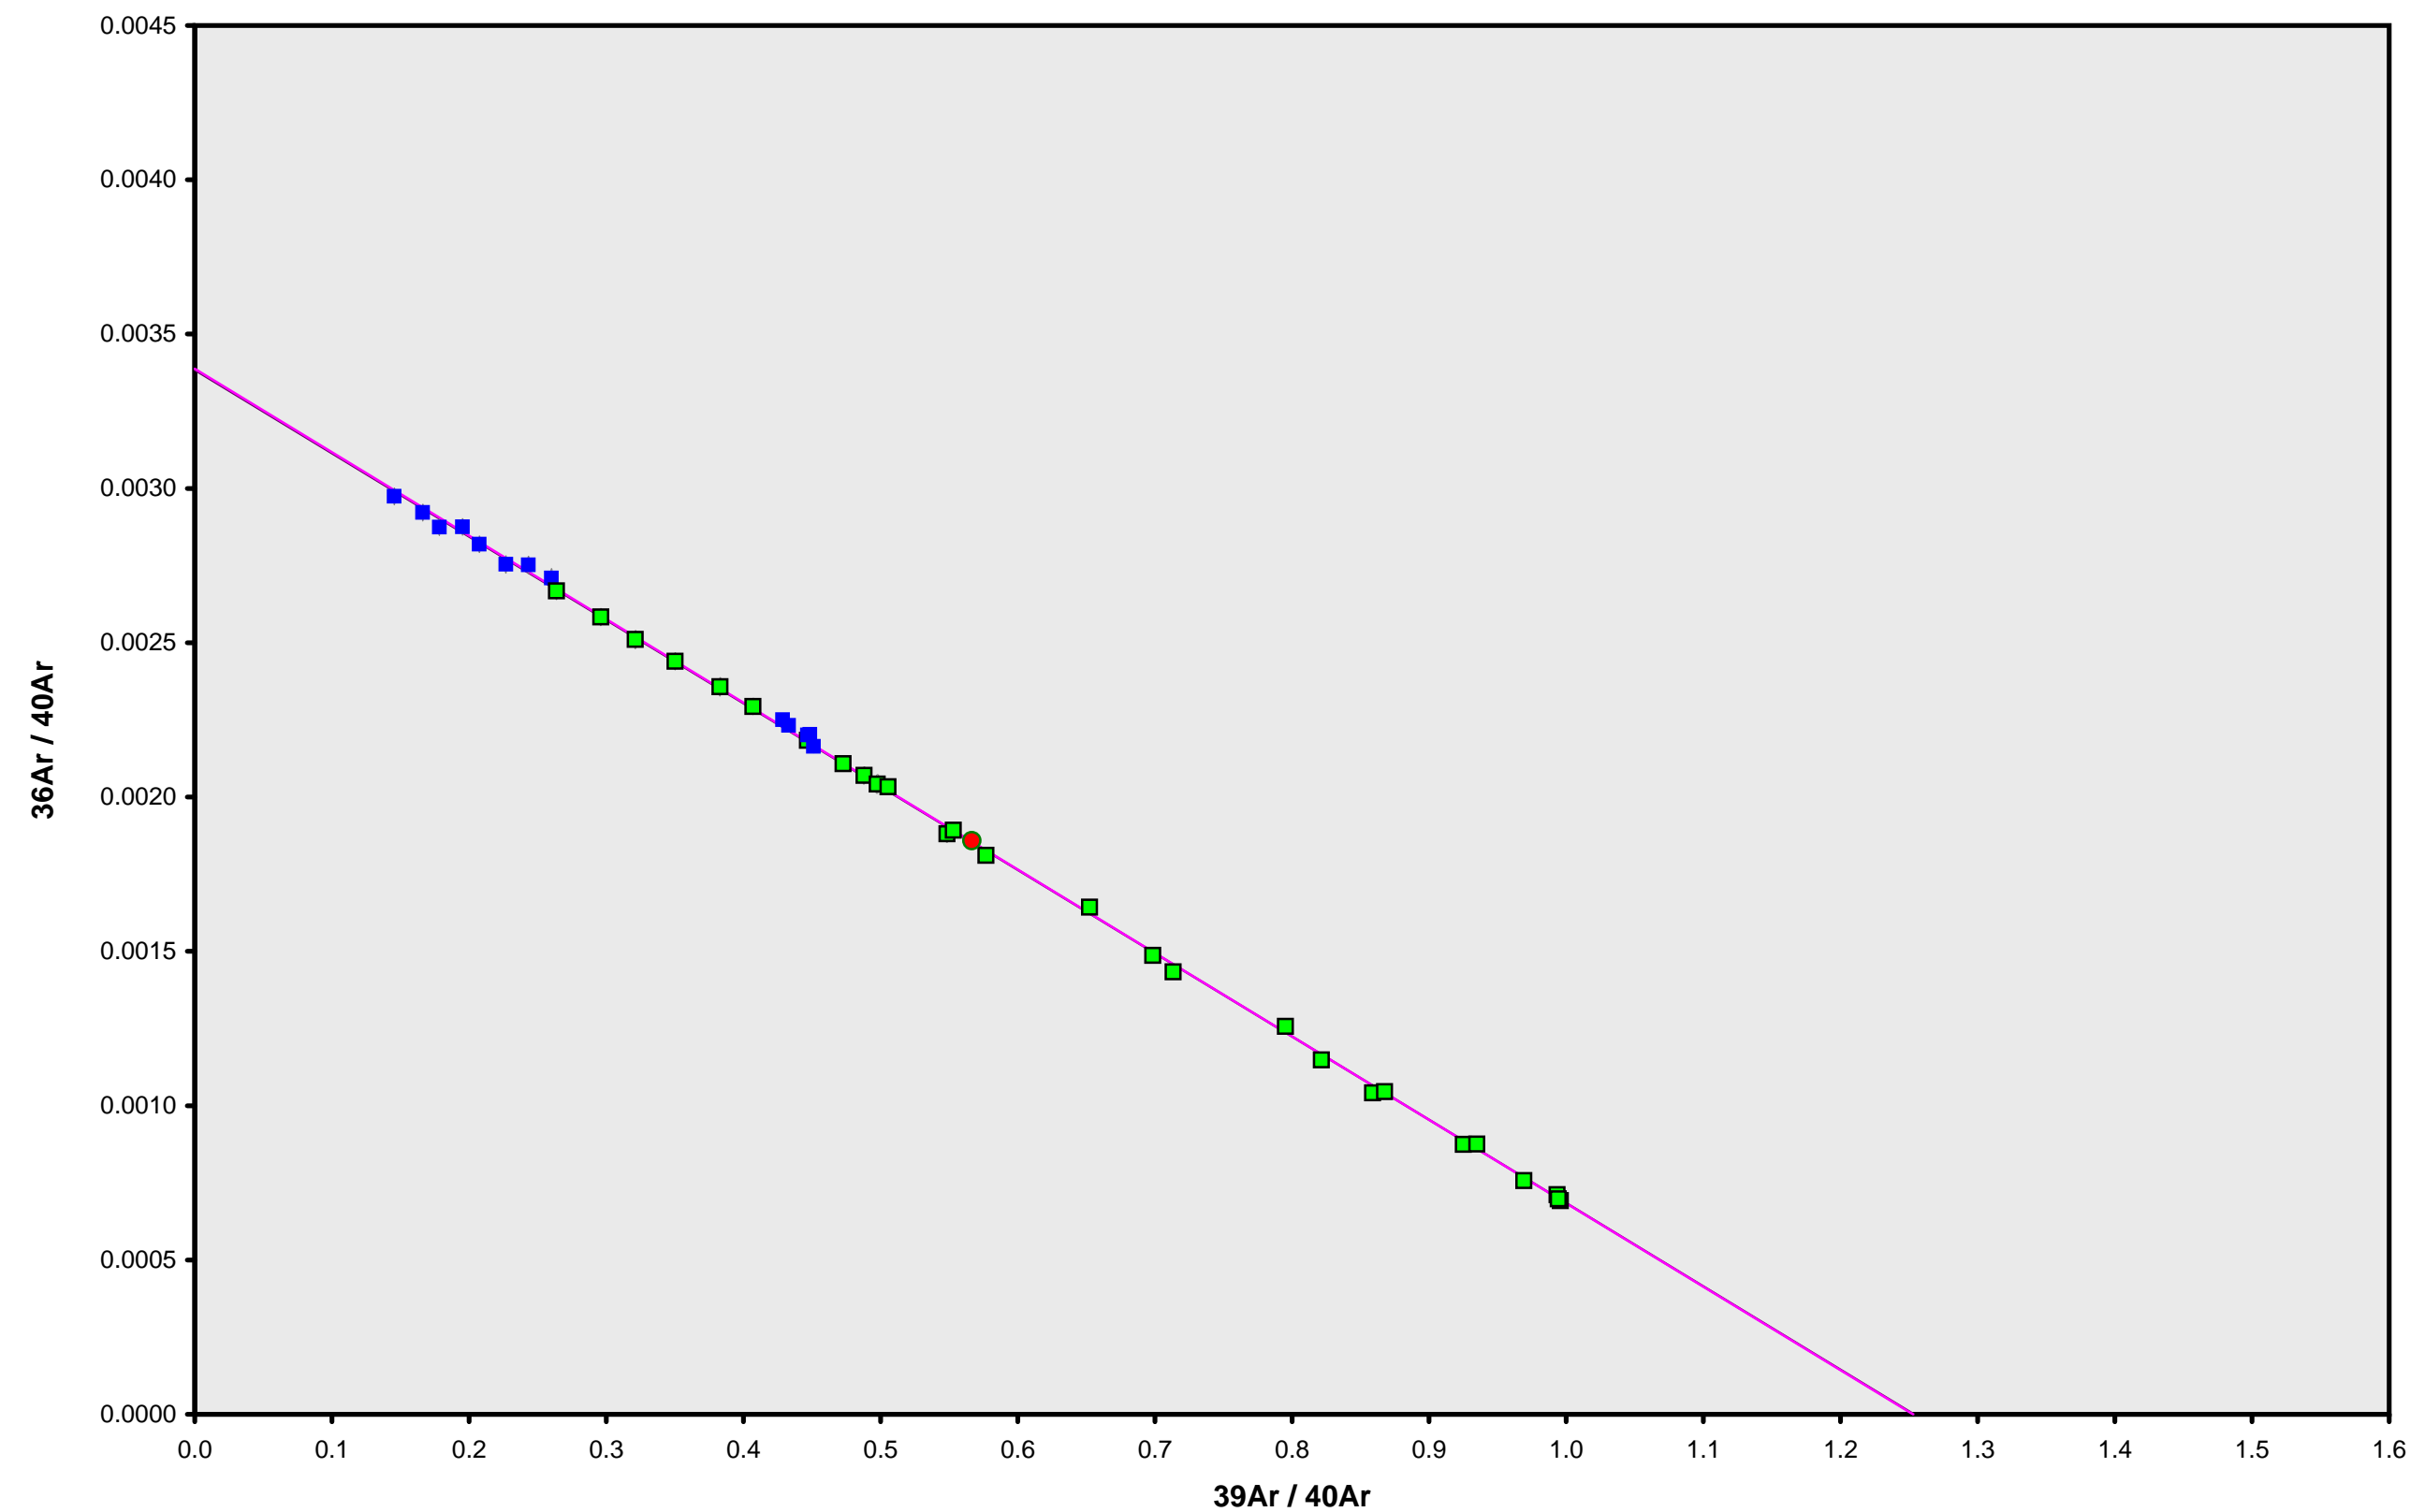

Ar-Ages in Ma

WEIGHTED PLATEAU

$2.59 \pm 0.01$

TOTAL FUSION

$2.59 \pm 0.01$

NORMAL ISOCHRON

$2.60 \pm 0.01$

INVERSE ISOCHRON

$2.60 \pm 0.01$

MSWD (PROBABILITY)

2.75 (0%)

SPREADING FACTOR

58.4%

40AR/36AR INTERCEPT

$295.1 \pm 1.7$

Sample Info

Groundmass

Kerguelen Plateau

Dan Miggins

IRR = 14-OSU-07 (7B19-14)

J =  $0.00179979 \pm 0.00000211$



| Incremental Heating |        | 36Ar(a)<br>[fA] | 37Ar(ca)<br>[fA] | 38Ar(cl)<br>[fA] | 39Ar(k)<br>[fA] | 40Ar(r)<br>[fA] | Age ± 2σ<br>(Ma) | 40Ar(r)<br>(%) | 39Ar(k)<br>(%) | K/Ca ± 2σ   |
|---------------------|--------|-----------------|------------------|------------------|-----------------|-----------------|------------------|----------------|----------------|-------------|
| 15D01958            | 1.9 %  | 1.5303378       | 13.9546          | 0.0895258        | 14.4666         | 91.997          | 20.39 ± 0.74     | 16.90          | 0.33           | 0.45 ± 0.02 |
| 15D01959            | 2.0 %  | 0.5797067       | 11.7093          | 0.0136583        | 10.8208         | 62.211          | 18.45 ± 0.47     | 26.64          | 0.25           | 0.40 ± 0.02 |
| 15D01961            | 2.1 %  | 0.4335803       | 13.0142          | 0.0000000        | 11.5226         | 62.173          | 17.32 ± 0.38     | 32.67          | 0.26           | 0.38 ± 0.02 |
| 15D01962            | 2.2 %  | 0.4203572       | 16.5205          | 0.0180281        | 14.7263         | 76.839          | 16.75 ± 0.29     | 38.22          | 0.34           | 0.38 ± 0.01 |
| 15D01963            | 2.3 %  | 0.3201782       | 16.5420          | 0.0320188        | 14.3163         | 72.490          | 16.26 ± 0.26     | 43.38          | 0.33           | 0.37 ± 0.01 |
| 15D01965            | 2.4 %  | 0.2760487       | 17.1644          | 0.0509636        | 14.8588         | 76.053          | 16.43 ± 0.22     | 48.24          | 0.34           | 0.37 ± 0.01 |
| 15D01966            | 2.5 %  | 0.2258956       | 16.2828          | 0.0347060        | 14.1466         | 70.666          | 16.04 ± 0.23     | 51.42          | 0.32           | 0.37 ± 0.01 |
| 15D01967            | 2.6 %  | ✓ 0.2076574     | 17.2446          | 0.0511608        | 14.8984         | 74.811          | 16.12 ± 0.20     | 54.93          | 0.34           | 0.37 ± 0.01 |
| 15D01969            | 2.7 %  | ✓ 0.1728335     | 16.6059          | 0.0217065        | 14.5233         | 73.019          | 16.14 ± 0.19     | 58.84          | 0.33           | 0.38 ± 0.01 |
| 15D01970            | 2.8 %  | ✓ 0.1598898     | 17.9289          | 0.0037311        | 15.7945         | 79.326          | 16.12 ± 0.17     | 62.66          | 0.36           | 0.38 ± 0.01 |
| 15D01971            | 2.9 %  | ✓ 0.1629107     | 19.2879          | 0.0045228        | 17.2706         | 85.044          | 15.81 ± 0.16     | 63.85          | 0.39           | 0.39 ± 0.01 |
| 15D01973            | 3.0 %  | ✓ 0.1826777     | 23.2185          | 0.0464462        | 20.7457         | 103.201         | 15.97 ± 0.13     | 65.65          | 0.47           | 0.38 ± 0.01 |
| 15D01974            | 3.2 %  | ✓ 0.1910979     | 27.3698          | 0.0517027        | 24.6668         | 122.705         | 15.97 ± 0.12     | 68.47          | 0.56           | 0.39 ± 0.01 |
| 15D01975            | 3.4 %  | ✓ 0.1202232     | 20.0240          | 0.0194802        | 17.7568         | 88.587          | 16.02 ± 0.14     | 71.37          | 0.41           | 0.38 ± 0.01 |
| 15D01977            | 3.6 %  | ✓ 0.1945268     | 31.6519          | 0.0638606        | 28.9615         | 144.476         | 16.02 ± 0.10     | 71.53          | 0.66           | 0.39 ± 0.01 |
| 15D01978            | 3.8 %  | ✓ 0.2040711     | 37.3266          | 0.0411058        | 34.4897         | 173.318         | 16.13 ± 0.09     | 74.18          | 0.79           | 0.40 ± 0.01 |
| 15D01979            | 4.0 %  | ✓ 0.2661915     | 49.4745          | 0.0644181        | 47.3032         | 235.886         | 16.01 ± 0.07     | 74.98          | 1.08           | 0.41 ± 0.01 |
| 15D01981            | 4.3 %  | ✓ 0.2548812     | 56.0979          | 0.0000000        | 54.9309         | 274.623         | 16.05 ± 0.07     | 78.46          | 1.25           | 0.42 ± 0.00 |
| 15D01982            | 4.6 %  | ✓ 0.1806729     | 48.4698          | 0.0000000        | 47.0641         | 236.714         | 16.15 ± 0.07     | 81.58          | 1.07           | 0.42 ± 0.01 |
| 15D01983            | 4.9 %  | ✓ 0.2336591     | 62.0901          | 0.0879814        | 63.4908         | 317.118         | 16.04 ± 0.06     | 82.11          | 1.45           | 0.44 ± 0.00 |
| 15D01985            | 5.2 %  | ✓ 0.2520218     | 72.8472          | 0.0354115        | 77.9502         | 389.061         | 16.02 ± 0.05     | 83.92          | 1.78           | 0.46 ± 0.00 |
| 15D01986            | 5.5 %  | ✓ 0.2926682     | 92.2221          | 0.0294549        | 104.1491        | 518.111         | 15.97 ± 0.04     | 85.68          | 2.38           | 0.49 ± 0.00 |
| 15D01987            | 5.8 %  | ✓ 0.2653023     | 98.2543          | 0.0806883        | 118.1265        | 587.171         | 15.96 ± 0.04     | 88.21          | 2.70           | 0.52 ± 0.00 |
| 15D01989            | 6.1 %  | 0.2237765       | 96.5756          | 0.0537151        | 122.6533        | 606.485         | 15.88 ± 0.04     | 90.15          | 2.80           | 0.55 ± 0.00 |
| 15D01990            | 6.5 %  | 0.1953419       | 95.0773          | 0.0473777        | 127.7747        | 629.306         | 15.81 ± 0.03     | 91.58          | 2.92           | 0.58 ± 0.00 |
| 15D01991            | 7.0 %  | 0.2160799       | 112.5102         | 0.0937807        | 161.6771        | 793.758         | 15.76 ± 0.03     | 92.54          | 3.69           | 0.62 ± 0.00 |
| 15D01993            | 7.6 %  | 0.2402176       | 148.3522         | 0.1105616        | 232.0763        | 1135.105        | 15.70 ± 0.03     | 94.10          | 5.30           | 0.67 ± 0.01 |
| 15D01994            | 8.4 %  | 0.2049595       | 164.6641         | 0.1176515        | 279.9734        | 1361.683        | 15.62 ± 0.03     | 95.72          | 6.39           | 0.73 ± 0.01 |
| 15D01995            | 9.4 %  | 0.2092609       | 196.2105         | 0.1030002        | 362.9353        | 1758.020        | 15.55 ± 0.02     | 96.58          | 8.28           | 0.80 ± 0.01 |
| 15D01997            | 10.5 % | 0.1957015       | 198.1173         | 0.1435327        | 394.2765        | 1899.507        | 15.47 ± 0.02     | 97.03          | 9.00           | 0.86 ± 0.01 |
| 15D01998            | 11.7 % | 0.1733511       | 188.5519         | 0.1488053        | 399.5446        | 1916.081        | 15.40 ± 0.02     | 97.38          | 9.12           | 0.91 ± 0.01 |
| 15D01999            | 13.1 % | 0.1510491       | 161.0915         | 0.2442725        | 353.5479        | 1687.555        | 15.33 ± 0.02     | 97.40          | 8.07           | 0.94 ± 0.01 |
| 15D02001            | 14.7 % | 0.1604162       | 154.0617         | 0.1757770        | 314.9793        | 1494.713        | 15.24 ± 0.02     | 96.91          | 7.19           | 0.88 ± 0.01 |
| 15D02002            | 16.5 % | 0.1675557       | 157.6272         | 0.2107543        | 260.7279        | 1225.381        | 15.09 ± 0.02     | 96.10          | 5.95           | 0.71 ± 0.01 |
| 15D02003            | 18.3 % | 0.1662025       | 169.8393         | 0.1872315        | 204.5475        | 948.313         | 14.89 ± 0.03     | 95.06          | 4.67           | 0.52 ± 0.00 |
| 15D02005            | 20.2 % | 0.1360655       | 134.3117         | 0.1202016        | 153.8124        | 707.469         | 14.77 ± 0.03     | 94.60          | 3.51           | 0.49 ± 0.00 |
| 15D02006            | 22.2 % | 0.1012813       | 144.5962         | 0.0633909        | 117.4541        | 536.900         | 14.68 ± 0.03     | 94.70          | 2.68           | 0.35 ± 0.00 |
| 15D02008            | 24.5 % | 0.0916462       | 173.7441         | 0.1065297        | 99.1960         | 447.658         | 14.50 ± 0.03     | 94.28          | 2.26           | 0.25 ± 0.00 |

Σ 9.7602949 3090.6324 2.7671537 4382.1562 21163.532

| Information on Analysis                                                                                                                                                                                                                                                   | Results                   | 40(r)/39(k) ± 2σ             | Age ± 2σ<br>(Ma)                                      | MSWD           | 39Ar(k)<br>(%,n)                           | K/Ca ± 2σ   |
|---------------------------------------------------------------------------------------------------------------------------------------------------------------------------------------------------------------------------------------------------------------------------|---------------------------|------------------------------|-------------------------------------------------------|----------------|--------------------------------------------|-------------|
| Sample = 154-4<br>Material = Groundmass<br>Location = Kerguelen Plateau<br>Analyst = Dan Miggins<br>Project = KERGUELEN   FALLOON (14-<br>Mass Discrimination Law = LIN<br>Irradiation = 14-OSU-06 (6C10-14)<br>J = 0.00178335 ± 0.00000432<br>FCT-NM = 28.201 ± 0.023 Ma | Age Plateau<br>Error Mean | 4.98715 ± 0.01006<br>± 0.20% | 16.01 ± 0.08<br>± 0.52%                               | 3.41<br>0%     | 16.02<br>16                                | 0.44 ± 0.02 |
|                                                                                                                                                                                                                                                                           |                           |                              | Full External Error ± 0.37<br>Analytical Error ± 0.03 | 1.73<br>1.8478 | 2σ Confidence Limit<br>Error Magnification |             |
|                                                                                                                                                                                                                                                                           | Total Fusion Age          | 4.82948 ± 0.00228<br>± 0.05% | 15.51 ± 0.08<br>± 0.48%                               |                | 38                                         | 0.61 ± 0.00 |
|                                                                                                                                                                                                                                                                           |                           |                              | Full External Error ± 0.36<br>Analytical Error ± 0.01 |                |                                            |             |



| Normal Isochron |         | 39(k)/36(a) ± 2σ |  | 40(a+r)/36(a) ± 2σ | r.i.   |
|-----------------|---------|------------------|--|--------------------|--------|
| 15D01958        | 1.9 %   | 9.45 ± 0.08      |  | 355.62 ± 2.60      | 0.8278 |
| 15D01959        | 2.0 %   | 18.67 ± 0.21     |  | 402.81 ± 3.61      | 0.7858 |
| 15D01961        | 2.1 %   | 26.58 ± 0.32     |  | 438.89 ± 4.55      | 0.8561 |
| 15D01962        | 2.2 %   | 35.03 ± 0.40     |  | 478.29 ± 4.92      | 0.8874 |
| 15D01963        | 2.3 %   | 44.71 ± 0.56     |  | 521.91 ± 6.06      | 0.9177 |
| 15D01965        | 2.4 %   | 53.83 ± 0.69     |  | 571.01 ± 6.69      | 0.9110 |
| 15D01966        | 2.5 %   | 62.62 ± 0.94     |  | 608.32 ± 8.57      | 0.9325 |
| 15D01967        | 2.6 % ✓ | 71.75 ± 1.06     |  | 655.76 ± 9.12      | 0.9361 |
| 15D01969        | 2.7 % ✓ | 84.03 ± 1.32     |  | 717.98 ± 10.69     | 0.9396 |
| 15D01970        | 2.8 % ✓ | 98.78 ± 1.65     |  | 791.63 ± 12.71     | 0.9556 |
| 15D01971        | 2.9 % ✓ | 106.01 ± 1.75    |  | 817.53 ± 13.09     | 0.9619 |
| 15D01973        | 3.0 % ✓ | 113.56 ± 1.66    |  | 860.43 ± 12.23     | 0.9664 |
| 15D01974        | 3.2 % ✓ | 129.08 ± 1.83    |  | 937.61 ± 12.95     | 0.9711 |
| 15D01975        | 3.4 % ✓ | 147.70 ± 2.92    |  | 1032.35 ± 19.98    | 0.9737 |
| 15D01977        | 3.6 % ✓ | 148.88 ± 2.18    |  | 1038.21 ± 14.92    | 0.9765 |
| 15D01978        | 3.8 % ✓ | 169.01 ± 2.27    |  | 1144.80 ± 15.07    | 0.9795 |
| 15D01979        | 4.0 % ✓ | 177.70 ± 2.18    |  | 1181.65 ± 14.30    | 0.9840 |
| 15D01981        | 4.3 % ✓ | 215.52 ± 2.86    |  | 1372.95 ± 18.01    | 0.9877 |
| 15D01982        | 4.6 % ✓ | 260.49 ± 4.07    |  | 1605.68 ± 24.86    | 0.9896 |
| 15D01983        | 4.9 % ✓ | 271.72 ± 3.76    |  | 1652.68 ± 22.69    | 0.9899 |
| 15D01985        | 5.2 % ✓ | 309.30 ± 3.87    |  | 1839.26 ± 22.82    | 0.9900 |
| 15D01986        | 5.5 % ✓ | 355.86 ± 4.34    |  | 2065.80 ± 24.97    | 0.9909 |
| 15D01987        | 5.8 % ✓ | 445.25 ± 5.10    |  | 2508.71 ± 28.47    | 0.9901 |
| 15D01989        | 6.1 %   | 548.11 ± 7.92    |  | 3005.73 ± 43.17    | 0.9938 |
| 15D01990        | 6.5 %   | 654.11 ± 9.94    |  | 3517.06 ± 53.19    | 0.9945 |
| 15D01991        | 7.0 %   | 748.23 ± 10.58   |  | 3968.95 ± 55.80    | 0.9941 |
| 15D01993        | 7.6 %   | 966.11 ± 13.18   |  | 5020.82 ± 68.10    | 0.9940 |
| 15D01994        | 8.4 %   | 1365.99 ± 22.22  |  | 6939.17 ± 112.46   | 0.9959 |
| 15D01995        | 9.4 %   | 1734.37 ± 28.05  |  | 8696.59 ± 140.08   | 0.9960 |
| 15D01997        | 10.5 %  | 2014.68 ± 33.12  |  | 10001.64 ± 163.78  | 0.9961 |
| 15D01998        | 11.7 %  | 2304.83 ± 41.55  |  | 11348.68 ± 203.92  | 0.9968 |
| 15D01999        | 13.1 %  | 2340.62 ± 44.93  |  | 11467.73 ± 219.50  | 0.9972 |
| 15D02001        | 14.7 %  | 1963.51 ± 36.34  |  | 9613.22 ± 177.39   | 0.9969 |
| 15D02002        | 16.5 %  | 1556.07 ± 25.80  |  | 7608.77 ± 125.67   | 0.9961 |
| 15D02003        | 18.3 %  | 1230.71 ± 22.04  |  | 6001.27 ± 107.09   | 0.9965 |
| 15D02005        | 20.2 %  | 1130.43 ± 21.97  |  | 5494.98 ± 106.49   | 0.9968 |
| 15D02006        | 22.2 %  | 1159.68 ± 26.93  |  | 5596.58 ± 129.67   | 0.9975 |
| 15D02008        | 24.5 %  | 1082.38 ± 28.27  |  | 5180.13 ± 135.03   | 0.9979 |

| Results         | 40(a)/36(a) ± 2σ      | 40(r)/39(k) ± 2σ           | Age ± 2σ (Ma)        | MSWD            |
|-----------------|-----------------------|----------------------------|----------------------|-----------------|
| Normal Isochron | 298.46 ± 4.64         | 4.97510 ± 0.02086          | 15.97 ± 0.10         | 3.19            |
| Error Chron     | ± 1.56%               | ± 0.42%                    | ± 0.64%              | 0%              |
|                 |                       | Full External Error ± 0.37 |                      |                 |
|                 |                       | Analytical Error ± 0.07    |                      |                 |
| Statistics      | 2σ Confidence Limit   | 1.76                       | Convergence          | 0.000048036931  |
|                 | Error Magnification   | 1.7860                     | Number of Iterations | 18              |
|                 | Number of Data Points | 16                         | Calculated Line      | Weighted York-2 |



| Inverse Isochron |         | 39(k)/40(a+r) ± 2σ    |  | 36(a)/40(a+r) ± 2σ      | r.i.   |
|------------------|---------|-----------------------|--|-------------------------|--------|
| 15D01958         | 1.9 %   | 0.0265826 ± 0.0001315 |  | 0.00281203 ± 0.00002058 | 0.0035 |
| 15D01959         | 2.0 %   | 0.0463390 ± 0.0003248 |  | 0.00248253 ± 0.00002226 | 0.0088 |
| 15D01961         | 2.1 %   | 0.0605512 ± 0.0003760 |  | 0.00227846 ± 0.00002361 | 0.0126 |
| 15D01962         | 2.2 %   | 0.0732453 ± 0.0003892 |  | 0.00209076 ± 0.00002152 | 0.0122 |
| 15D01963         | 2.3 %   | 0.0856732 ± 0.0004275 |  | 0.00191605 ± 0.00002225 | 0.0177 |
| 15D01965         | 2.4 %   | 0.0942665 ± 0.0004963 |  | 0.00175129 ± 0.00002053 | 0.0181 |
| 15D01966         | 2.5 %   | 0.1029455 ± 0.0005576 |  | 0.00164386 ± 0.00002316 | 0.0190 |
| 15D01967         | 2.6 % ✓ | 0.1094072 ± 0.0005677 |  | 0.00152494 ± 0.00002121 | 0.0211 |
| 15D01969         | 2.7 % ✓ | 0.1170376 ± 0.0006297 |  | 0.00139280 ± 0.00002074 | 0.0228 |
| 15D01970         | 2.8 % ✓ | 0.1247857 ± 0.0006140 |  | 0.00126322 ± 0.00002029 | 0.0219 |
| 15D01971         | 2.9 % ✓ | 0.1296748 ± 0.0005867 |  | 0.00122320 ± 0.00001959 | 0.0223 |
| 15D01973         | 3.0 % ✓ | 0.1319850 ± 0.0004965 |  | 0.00116220 ± 0.00001652 | 0.0211 |
| 15D01974         | 3.2 % ✓ | 0.1376692 ± 0.0004649 |  | 0.00106654 ± 0.00001473 | 0.0193 |
| 15D01975         | 3.4 % ✓ | 0.1430697 ± 0.0006450 |  | 0.00096866 ± 0.00001874 | 0.0202 |
| 15D01977         | 3.6 % ✓ | 0.1434028 ± 0.0004529 |  | 0.00096320 ± 0.00001384 | 0.0162 |
| 15D01978         | 3.8 % ✓ | 0.1476312 ± 0.0003990 |  | 0.00087351 ± 0.00001150 | 0.0151 |
| 15D01979         | 4.0 % ✓ | 0.1503857 ± 0.0003284 |  | 0.00084627 ± 0.00001024 | 0.0125 |
| 15D01981         | 4.3 % ✓ | 0.1569722 ± 0.0003261 |  | 0.00072836 ± 0.00000956 | 0.0098 |
| 15D01982         | 4.6 % ✓ | 0.1622324 ± 0.0003654 |  | 0.00062279 ± 0.00000964 | 0.0100 |
| 15D01983         | 4.9 % ✓ | 0.1644139 ± 0.0003225 |  | 0.00060508 ± 0.00000831 | 0.0079 |
| 15D01985         | 5.2 % ✓ | 0.1681652 ± 0.0002977 |  | 0.00054370 ± 0.00000675 | 0.0072 |
| 15D01986         | 5.5 % ✓ | 0.1722626 ± 0.0002828 |  | 0.00048407 ± 0.00000585 | 0.0054 |
| 15D01987         | 5.8 % ✓ | 0.1774823 ± 0.0002847 |  | 0.00039861 ± 0.00000452 | 0.0047 |
| 15D01989         | 6.1 %   | 0.1823540 ± 0.0002935 |  | 0.00033270 ± 0.00000478 | 0.0038 |
| 15D01990         | 6.5 %   | 0.1859815 ± 0.0002951 |  | 0.00028433 ± 0.00000430 | 0.0038 |
| 15D01991         | 7.0 %   | 0.1885207 ± 0.0002891 |  | 0.00025196 ± 0.00000354 | 0.0029 |
| 15D01993         | 7.6 %   | 0.1924205 ± 0.0002868 |  | 0.00019917 ± 0.00000270 | 0.0017 |
| 15D01994         | 8.4 %   | 0.1968527 ± 0.0002884 |  | 0.00014411 ± 0.00000234 | 0.0012 |
| 15D01995         | 9.4 %   | 0.1994308 ± 0.0002887 |  | 0.00011499 ± 0.00000185 | 0.0009 |
| 15D01997         | 10.5 %  | 0.2014352 ± 0.0002906 |  | 0.00009998 ± 0.00000164 | 0.0008 |
| 15D01998         | 11.7 %  | 0.2030922 ± 0.0002930 |  | 0.00008812 ± 0.00000158 | 0.0007 |
| 15D01999         | 13.1 %  | 0.2041045 ± 0.0002952 |  | 0.00008720 ± 0.00000167 | 0.0009 |
| 15D02001         | 14.7 %  | 0.2042514 ± 0.0002963 |  | 0.00010402 ± 0.00000192 | 0.0010 |
| 15D02002         | 16.5 %  | 0.2045095 ± 0.0003006 |  | 0.00013143 ± 0.00000217 | 0.0013 |
| 15D02003         | 18.3 %  | 0.2050755 ± 0.0003076 |  | 0.00016663 ± 0.00000297 | 0.0017 |
| 15D02005         | 20.2 %  | 0.2057205 ± 0.0003189 |  | 0.00018198 ± 0.00000353 | 0.0022 |
| 15D02006         | 22.2 %  | 0.2072127 ± 0.0003369 |  | 0.00017868 ± 0.00000414 | 0.0032 |
| 15D02008         | 24.5 %  | 0.2089482 ± 0.0003546 |  | 0.00019305 ± 0.00000503 | 0.0034 |

| Results                         | 40(a)/36(a) ± 2σ      |        | 40(r)/39(k) ± 2σ                                      | Age ± 2σ (Ma)        | MSWD       |
|---------------------------------|-----------------------|--------|-------------------------------------------------------|----------------------|------------|
| Inverse Isochron<br>Error Chron | 298.74 ± 4.68 ± 1.57% |        | 4.97432 ± 0.02104 ± 0.42%                             | 15.97 ± 0.10 ± 0.64% | 3.22<br>0% |
|                                 |                       |        | Full External Error ± 0.37<br>Analytical Error ± 0.07 |                      |            |
| Statistics                      | 2σ Confidence Limit   | 1.76   | Convergence                                           | 0.0003373051         |            |
|                                 | Error Magnification   | 1.7943 | Number of Iterations                                  | 2                    |            |
|                                 | Number of Data Points | 16     | Calculated Line                                       | Weighted York-2      |            |
|                                 | Spreading Factor      | 33.9%  |                                                       |                      |            |







| OSU Argon Geochronology Lab |        |                 |        |                 |      |                  |      |                  |         |                  |      |                 |      |                 |      |                 |      |                  |      |                  |         |                 |      |                  |      |                 |      |                 |      |                 |      |                 |      |
|-----------------------------|--------|-----------------|--------|-----------------|------|------------------|------|------------------|---------|------------------|------|-----------------|------|-----------------|------|-----------------|------|------------------|------|------------------|---------|-----------------|------|------------------|------|-----------------|------|-----------------|------|-----------------|------|-----------------|------|
| Degassing Patterns          |        | 36Ar(a)<br>[fA] | %1σ    | 36Ar(c)<br>[fA] | %1σ  | 36Ar(ca)<br>[fA] | %1σ  | 36Ar(cl)<br>[fA] | %1σ     | 37Ar(ca)<br>[fA] | %1σ  | 38Ar(a)<br>[fA] | %1σ  | 38Ar(c)<br>[fA] | %1σ  | 38Ar(k)<br>[fA] | %1σ  | 38Ar(ca)<br>[fA] | %1σ  | 38Ar(cl)<br>[fA] | %1σ     | 39Ar(k)<br>[fA] | %1σ  | 39Ar(ca)<br>[fA] | %1σ  | 40Ar(r)<br>[fA] | %1σ  | 40Ar(a)<br>[fA] | %1σ  | 40Ar(c)<br>[fA] | %1σ  | 40Ar(k)<br>[fA] | %1σ  |
| 15D01958                    | 1.9 %  | 1.5303378       | 0.37   | 0.0000000       | 0.00 | 0.0036840        | 1.84 | 0.0000123        | 41.94   | 13.9546          | 1.84 | 0.2860201       | 0.37 | 0.0000000       | 0.00 | 0.164629        | 0.25 | 0.0001940        | 1.84 | 0.0895258        | 41.95   | 14.4666         | 0.25 | 0.0093914        | 1.84 | 91.997          | 1.80 | 452.2148        | 0.37 | 0.0000000       | 0.00 | 0.0146112       | 0.25 |
| 15D01959                    | 2.0 %  | 0.5797067       | 0.45   | 0.0000000       | 0.00 | 0.0030912        | 2.15 | 0.0000019        | 281.34  | 11.7093          | 2.15 | 0.1083472       | 0.45 | 0.0000000       | 0.00 | 0.123141        | 0.35 | 0.0001628        | 2.15 | 0.0136583        | 281.34  | 10.8208         | 0.35 | 0.0078803        | 2.15 | 62.211          | 1.24 | 171.3033        | 0.45 | 0.0000000       | 0.00 | 0.0109290       | 0.35 |
| 15D01961                    | 2.1 %  | 0.4335803       | 0.52   | 0.0000000       | 0.00 | 0.0034358        | 1.98 | 0.0000000        | 0.00    | 13.0142          | 1.98 | 0.0810362       | 0.52 | 0.0000000       | 0.00 | 0.131128        | 0.31 | 0.0001809        | 1.98 | 0.0000000        | 0.00    | 11.5226         | 0.31 | 0.0087586        | 1.98 | 62.173          | 1.07 | 128.1230        | 0.52 | 0.0000000       | 0.00 | 0.0116379       | 0.31 |
| 15D01962                    | 2.2 %  | 0.4203572       | 0.51   | 0.0000000       | 0.00 | 0.0043614        | 1.59 | 0.0000025        | 215.54  | 16.5205          | 1.59 | 0.0785648       | 0.51 | 0.0000000       | 0.00 | 0.167585        | 0.26 | 0.0002296        | 1.59 | 0.0180281        | 215.54  | 14.7263         | 0.26 | 0.0111183        | 1.59 | 76.839          | 0.84 | 124.2156        | 0.51 | 0.0000000       | 0.00 | 0.0148735       | 0.26 |
| 15D01963                    | 2.3 %  | 0.3201782       | 0.58   | 0.0000000       | 0.00 | 0.0043671        | 1.53 | 0.0000044        | 115.93  | 16.5420          | 1.53 | 0.0598413       | 0.58 | 0.0000000       | 0.00 | 0.162919        | 0.24 | 0.0002299        | 1.53 | 0.0320188        | 115.93  | 14.3163         | 0.24 | 0.0111328        | 1.53 | 72.490          | 0.76 | 94.6126         | 0.58 | 0.0000000       | 0.00 | 0.0144594       | 0.24 |
| 15D01965                    | 2.4 %  | 0.2760487       | 0.58   | 0.0000000       | 0.00 | 0.0045314        | 1.48 | 0.0000070        | 80.91   | 17.1644          | 1.48 | 0.0515935       | 0.58 | 0.0000000       | 0.00 | 0.169093        | 0.26 | 0.0002386        | 1.48 | 0.0509636        | 80.92   | 14.8588         | 0.26 | 0.0115516        | 1.48 | 76.053          | 0.64 | 81.5724         | 0.58 | 0.0000000       | 0.00 | 0.0150074       | 0.26 |
| 15D01966                    | 2.5 %  | 0.2258956       | 0.70   | 0.0000000       | 0.00 | 0.0042987        | 1.51 | 0.0000048        | 111.63  | 16.2828          | 1.51 | 0.0422199       | 0.70 | 0.0000000       | 0.00 | 0.160988        | 0.26 | 0.0002263        | 1.51 | 0.0347060        | 111.64  | 14.1466         | 0.26 | 0.0109583        | 1.51 | 70.666          | 0.67 | 66.7522         | 0.70 | 0.0000000       | 0.00 | 0.0142880       | 0.26 |
| 15D01967                    | 2.6 %  | ✓ 0.2076574     | 0.69   | 0.0000000       | 0.00 | 0.0045526        | 1.47 | 0.0000071        | 74.77   | 17.2446          | 1.47 | 0.0388112       | 0.69 | 0.0000000       | 0.00 | 0.169544        | 0.25 | 0.0002397        | 1.47 | 0.0511608        | 74.78   | 14.8984         | 0.25 | 0.0116056        | 1.47 | 74.811          | 0.58 | 61.3628         | 0.69 | 0.0000000       | 0.00 | 0.0150474       | 0.25 |
| 15D01969                    | 2.7 %  | ✓ 0.1728335     | 0.74   | 0.0000000       | 0.00 | 0.0043839        | 1.50 | 0.0000030        | 188.03  | 16.6059          | 1.50 | 0.0323026       | 0.74 | 0.0000000       | 0.00 | 0.165275        | 0.26 | 0.0002308        | 1.50 | 0.0217065        | 188.04  | 14.5233         | 0.26 | 0.0111757        | 1.50 | 73.019          | 0.53 | 51.0723         | 0.74 | 0.0000000       | 0.00 | 0.0146685       | 0.26 |
| 15D01970                    | 2.8 %  | ✓ 0.1598898     | 0.80   | 0.0000000       | 0.00 | 0.0047332        | 1.41 | 0.0000005        | 1007.68 | 17.9289          | 1.41 | 0.0298834       | 0.80 | 0.0000000       | 0.00 | 0.179742        | 0.24 | 0.0002492        | 1.41 | 0.0037311        | 1007.68 | 15.7945         | 0.24 | 0.0120662        | 1.41 | 79.326          | 0.49 | 47.2474         | 0.80 | 0.0000000       | 0.00 | 0.0159525       | 0.24 |
| 15D01971                    | 2.9 %  | ✓ 0.1629107     | 0.80   | 0.0000000       | 0.00 | 0.0050920        | 1.33 | 0.0000006        | 832.28  | 19.2879          | 1.33 | 0.0304480       | 0.80 | 0.0000000       | 0.00 | 0.196539        | 0.22 | 0.0002681        | 1.33 | 0.0045228        | 832.28  | 17.2706         | 0.22 | 0.0129808        | 1.33 | 85.044          | 0.46 | 48.1401         | 0.80 | 0.0000000       | 0.00 | 0.0174433       | 0.22 |
| 15D01973                    | 3.0 %  | ✓ 0.1826777     | 0.71   | 0.0000000       | 0.00 | 0.0061297        | 1.10 | 0.0000064        | 82.29   | 23.2185          | 1.10 | 0.0341425       | 0.71 | 0.0000000       | 0.00 | 0.236086        | 0.18 | 0.0003227        | 1.10 | 0.0464462        | 82.29   | 20.7457         | 0.18 | 0.0156260        | 1.10 | 103.201         | 0.38 | 53.9813         | 0.71 | 0.0000000       | 0.00 | 0.0209531       | 0.18 |
| 15D01974                    | 3.2 %  | ✓ 0.1910979     | 0.69   | 0.0000000       | 0.00 | 0.0072256        | 0.95 | 0.0000071        | 71.44   | 27.3698          | 0.95 | 0.0357162       | 0.69 | 0.0000000       | 0.00 | 0.280709        | 0.16 | 0.0003804        | 0.95 | 0.0517027        | 71.44   | 24.6668         | 0.16 | 0.0184199        | 0.95 | 122.705         | 0.32 | 56.4694         | 0.69 | 0.0000000       | 0.00 | 0.0249135       | 0.16 |
| 15D01975                    | 3.4 %  | ✓ 0.1202232     | 0.97   | 0.0000000       | 0.00 | 0.0052863        | 1.27 | 0.0000027        | 199.40  | 20.0240          | 1.27 | 0.0224697       | 0.97 | 0.0000000       | 0.00 | 0.202072        | 0.22 | 0.0002783        | 1.27 | 0.0194802        | 199.40  | 17.7568         | 0.22 | 0.0134762        | 1.27 | 88.587          | 0.40 | 35.5260         | 0.97 | 0.0000000       | 0.00 | 0.0179343       | 0.22 |
| 15D01977                    | 3.6 %  | ✓ 0.1945268     | 0.72   | 0.0000000       | 0.00 | 0.0083561        | 0.86 | 0.0000088        | 59.88   | 31.6519          | 0.86 | 0.0363571       | 0.72 | 0.0000000       | 0.00 | 0.329581        | 0.15 | 0.0004400        | 0.86 | 0.0638606        | 59.88   | 28.9615         | 0.15 | 0.0213017        | 0.86 | 144.476         | 0.29 | 57.4827         | 0.72 | 0.0000000       | 0.00 | 0.0292511       | 0.15 |
| 15D01978                    | 3.8 %  | ✓ 0.2040711     | 0.66   | 0.0000000       | 0.00 | 0.0098542        | 0.73 | 0.0000057        | 95.45   | 37.3266          | 0.73 | 0.0381409       | 0.66 | 0.0000000       | 0.00 | 0.392493        | 0.13 | 0.0005188        | 0.73 | 0.0411058        | 95.46   | 34.4897         | 0.13 | 0.0251208        | 0.73 | 173.318         | 0.23 | 60.3030         | 0.66 | 0.0000000       | 0.00 | 0.0348346       | 0.13 |
| 15D01979                    | 4.0 %  | ✓ 0.2661915     | 0.60   | 0.0000000       | 0.00 | 0.0130613        | 0.62 | 0.0000089        | 58.33   | 49.4745          | 0.62 | 0.0497512       | 0.60 | 0.0000000       | 0.00 | 0.538310        | 0.11 | 0.0006877        | 0.62 | 0.0644181        | 58.34   | 47.3032         | 0.11 | 0.0332963        | 0.62 | 235.886         | 0.21 | 78.6596         | 0.60 | 0.0000000       | 0.00 | 0.0477762       | 0.11 |
| 15D01981                    | 4.3 %  | ✓ 0.2548812     | 0.66   | 0.0000000       | 0.00 | 0.0148099        | 0.56 | 0.0000000        | 0.00    | 56.0979          | 0.56 | 0.0476373       | 0.66 | 0.0000000       | 0.00 | 0.625113        | 0.10 | 0.0007798        | 0.56 | 0.0000000        | 0.00    | 54.9309         | 0.10 | 0.0377539        | 0.56 | 274.623         | 0.18 | 75.3174         | 0.66 | 0.0000000       | 0.00 | 0.0554802       | 0.10 |
| 15D01982                    | 4.6 %  | ✓ 0.1806729     | 0.77   | 0.0000000       | 0.00 | 0.0127960        | 0.61 | 0.0000000        | 0.00    | 48.4698          | 0.61 | 0.0337678       | 0.77 | 0.0000000       | 0.00 | 0.535589        | 0.11 | 0.0006737        | 0.61 | 0.0000000        | 0.00    | 47.0641         | 0.11 | 0.0326202        | 0.61 | 236.714         | 0.18 | 53.3888         | 0.77 | 0.0000000       | 0.00 | 0.0475347       | 0.11 |
| 15D01983                    | 4.9 %  | ✓ 0.2336591     | 0.69   | 0.0000000       | 0.00 | 0.0163918        | 0.53 | 0.0000122        | 44.13   | 62.0901          | 0.53 | 0.0436709       | 0.69 | 0.0000000       | 0.00 | 0.722525        | 0.10 | 0.0008631        | 0.53 | 0.0879814        | 44.14   | 63.4908         | 0.10 | 0.0417867        | 0.53 | 317.118         | 0.15 | 69.0463         | 0.69 | 0.0000000       | 0.00 | 0.0641257       | 0.10 |
| 15D01985                    | 5.2 %  | ✓ 0.2520218     | 0.62   | 0.0000000       | 0.00 | 0.0192317        | 0.45 | 0.0000049        | 107.46  | 72.8472          | 0.45 | 0.0471029       | 0.62 | 0.0000000       | 0.00 | 0.887074        | 0.09 | 0.0010126        | 0.45 | 0.0354115        | 107.46  | 77.9502         | 0.09 | 0.0490262        | 0.45 | 389.061         | 0.12 | 74.4725         | 0.62 | 0.0000000       | 0.00 | 0.0787297       | 0.09 |
| 15D01986                    | 5.5 %  | ✓ 0.2926682     | 0.60   | 0.0000000       | 0.00 | 0.0243466        | 0.43 | 0.0000041        | 129.37  | 92.2221          | 0.43 | 0.0546997       | 0.60 | 0.0000000       | 0.00 | 1.185216        | 0.08 | 0.0012819        | 0.43 | 0.0294549        | 129.37  | 104.1491        | 0.08 | 0.0620655        | 0.43 | 518.111         | 0.10 | 86.4835         | 0.60 | 0.0000000       | 0.00 | 0.1051906       | 0.08 |
| 15D01987                    | 5.8 %  | ✓ 0.2653023     | 0.57   | 0.0000000       | 0.00 | 0.0259391        | 0.41 | 0.0000112        | 46.88   | 98.2543          | 0.41 | 0.0495850       | 0.57 | 0.0000000       | 0.00 | 1.344280        | 0.08 | 0.0013657        | 0.41 | 0.0806883        | 46.89   | 118.1265        | 0.08 | 0.0661251        | 0.41 | 587.171         | 0.08 | 78.3968         | 0.57 | 0.0000000       | 0.00 | 0.1193078       | 0.08 |
| 15D01989                    | 6.1 %  | 0.2237765       | 0.72   | 0.0000000       | 0.00 | 0.0254960        | 0.41 | 0.0000074        | 72.80   | 96.5756          | 0.41 | 0.0418238       | 0.72 | 0.0000000       | 0.00 | 1.395794        | 0.08 | 0.0013424        | 0.41 | 0.0537151        | 72.81   | 122.6533        | 0.08 | 0.0649954        | 0.41 | 606.485         | 0.08 | 66.1260         | 0.72 | 0.0000000       | 0.00 | 0.1238798       | 0.08 |
| 15D01990                    | 6.5 %  | 0.1953419       | 0.76   | 0.0000000       | 0.00 | 0.0251004        | 0.43 | 0.0000066        | 80.76   | 95.0773          | 0.43 | 0.0365094       | 0.76 | 0.0000000       | 0.00 | 1.454076        | 0.08 | 0.0013216        | 0.43 | 0.0473777        | 80.76   | 127.7747        | 0.08 | 0.0639871        | 0.43 | 629.306         | 0.07 | 57.7235         | 0.76 | 0.0000000       | 0.00 | 0.1290525       | 0.08 |
| 15D01991                    | 7.0 %  | 0.2160799       | 0.70   | 0.0000000       | 0.00 | 0.0297027        | 0.39 | 0.0000130        | 41.04   | 112.5102         | 0.39 | 0.0403853       | 0.70 | 0.0000000       | 0.00 | 1.839886        | 0.08 | 0.0015639        | 0.39 | 0.0937807        | 41.05   | 161.6771        | 0.08 | 0.0757194        | 0.39 | 793.758         | 0.06 | 63.8516         | 0.70 | 0.0000000       | 0.00 | 0.1632939       | 0.08 |
| 15D01993                    | 7.6 %  | 0.2402176       | 0.68   | 0.0000000       | 0.00 | 0.0391650        | 0.37 | 0.0000153        | 35.16   | 148.3522         | 0.37 | 0.0448967       | 0.68 | 0.0000000       | 0.00 | 2.641028        | 0.07 | 0.0020621        | 0.37 | 0.1105616        | 35.17   | 232.0763        | 0.07 | 0.0998410        | 0.37 | 1135.105        | 0.04 | 70.9843         | 0.68 | 0.0000000       | 0.00 | 0.2343971       | 0.07 |
| 15D01994                    | 8.4 %  | 0.2049595       | 0.81   | 0.0000000       | 0.00 | 0.0434713        | 0.36 | 0.0000163        | 33.52   | 164.6641         | 0.36 | 0.0383069       | 0.81 | 0.0000000       | 0.00 | 3.186097        | 0.07 | 0.0022888        | 0.36 | 0.1176515        | 33.53   | 279.9734        | 0.07 | 0.1108189        | 0.36 | 1361.683        | 0.04 | 60.5655         | 0.81 | 0.0000000       | 0.00 | 0.2827731       | 0.07 |
| 15D01995                    | 9.4 %  | 0.2092609       | 0.81   | 0.0000000       | 0.00 | 0.0517996        | 0.35 | 0.0000143        | 37.28   | 196.2105         | 0.35 | 0.0391109       | 0.81 | 0.0000000       | 0.00 | 4.130204        | 0.07 | 0.0027273        | 0.35 | 0.1030002        | 37.29   | 362.9353        | 0.07 | 0.1320497        | 0.35 | 1758.020        | 0.03 | 61.8366         | 0.81 | 0.0000000       | 0.00 | 0.3665647       | 0.07 |
| 15D01997                    | 10.5 % | 0.1957015       | 0.82   | 0.0000000       | 0.00 | 0.0523030        | 0.35 | 0.0000199        | 26.67   | 198.1173         | 0.35 | 0.0365766       | 0.82 | 0.0000000       | 0.00 | 4.486866        | 0.07 | 0.0027538        | 0.35 | 0.1435327        | 26.68   | 394.2765        | 0.07 | 0.1333329        | 0.35 | 1899.507        | 0.03 | 57.8298         | 0.82 | 0.0000000       | 0.00 | 0.3982192       | 0.07 |
| 15D01998                    | 11.7 % | 0.1733511       | 0.90</ |                 |      |                  |      |                  |         |                  |      |                 |      |                 |      |                 |      |                  |      |                  |         |                 |      |                  |      |                 |      |                 |      |                 |      |                 |      |



| Additional<br>Parameters |        | 40Ar/39Ar  | 1σ       | 37Ar/39Ar | 1σ       | 36Ar/39Ar | 1σ       | Time<br>(days) | 37Ar<br>(decay) | 39Ar<br>(decay) | 40Ar<br>(moles) |
|--------------------------|--------|------------|----------|-----------|----------|-----------|----------|----------------|-----------------|-----------------|-----------------|
| 15D01958                 | 1.9 %  | 37.595225  | 0.092954 | 0.963983  | 0.017856 | 0.105971  | 0.000466 | 84.897         | 5.362112        | 1.00060010      | 2.612E-11       |
| 15D01959                 | 2.0 %  | 21.565420  | 0.075518 | 1.081318  | 0.023503 | 0.053820  | 0.000304 | 84.908         | 5.363215        | 1.00060017      | 1.121E-11       |
| 15D01961                 | 2.1 %  | 16.503405  | 0.051195 | 1.128590  | 0.022583 | 0.037898  | 0.000226 | 84.926         | 5.365202        | 1.00060030      | 9.135E-12       |
| 15D01962                 | 2.2 %  | 13.643467  | 0.036220 | 1.120992  | 0.018116 | 0.028819  | 0.000165 | 84.936         | 5.366232        | 1.00060037      | 9.651E-12       |
| 15D01963                 | 2.3 %  | 11.664200  | 0.029081 | 1.154571  | 0.017883 | 0.022652  | 0.000141 | 84.946         | 5.367263        | 1.00060044      | 8.022E-12       |
| 15D01965                 | 2.4 %  | 10.600986  | 0.027887 | 1.154269  | 0.017331 | 0.018869  | 0.000119 | 84.964         | 5.369177        | 1.00060057      | 7.567E-12       |
| 15D01966                 | 2.5 %  | 9.707369   | 0.026268 | 1.150115  | 0.017673 | 0.016260  | 0.000120 | 84.974         | 5.370209        | 1.00060064      | 6.597E-12       |
| 15D01967                 | 2.6 %  | ✓ 9.134063 | 0.023679 | 1.156580  | 0.017288 | 0.014233  | 0.000103 | 84.983         | 5.371166        | 1.00060070      | 6.537E-12       |
| 15D01969                 | 2.7 %  | ✓ 8.538703 | 0.022954 | 1.142515  | 0.017375 | 0.012193  | 0.000094 | 85.001         | 5.373082        | 1.00060083      | 5.957E-12       |
| 15D01970                 | 2.8 %  | ✓ 8.008629 | 0.019690 | 1.134266  | 0.016247 | 0.010415  | 0.000085 | 85.010         | 5.374040        | 1.00060089      | 6.076E-12       |
| 15D01971                 | 2.9 %  | ✓ 7.706815 | 0.017421 | 1.115970  | 0.015011 | 0.009720  | 0.000078 | 85.019         | 5.374999        | 1.00060095      | 6.394E-12       |
| 15D01973                 | 3.0 %  | ✓ 7.571924 | 0.014232 | 1.118355  | 0.012503 | 0.009095  | 0.000064 | 85.036         | 5.376842        | 1.00060108      | 7.546E-12       |
| 15D01974                 | 3.2 %  | ✓ 7.259380 | 0.012248 | 1.108751  | 0.010669 | 0.008034  | 0.000055 | 85.045         | 5.377801        | 1.00060114      | 8.602E-12       |
| 15D01975                 | 3.4 %  | ✓ 6.985308 | 0.015735 | 1.126828  | 0.014533 | 0.007063  | 0.000067 | 85.053         | 5.378686        | 1.00060120      | 5.958E-12       |
| 15D01977                 | 3.6 %  | ✓ 6.969249 | 0.010998 | 1.092092  | 0.009569 | 0.007000  | 0.000049 | 85.071         | 5.380531        | 1.00060132      | 9.695E-12       |
| 15D01978                 | 3.8 %  | ✓ 6.769715 | 0.009141 | 1.081467  | 0.008051 | 0.006198  | 0.000040 | 85.080         | 5.381491        | 1.00060139      | 1.122E-11       |
| 15D01979                 | 4.0 %  | ✓ 6.645900 | 0.007252 | 1.045167  | 0.006543 | 0.005900  | 0.000035 | 85.088         | 5.382376        | 1.00060145      | 1.510E-11       |
| 15D01981                 | 4.3 %  | ✓ 6.367190 | 0.006609 | 1.020544  | 0.005800 | 0.004906  | 0.000031 | 85.106         | 5.384222        | 1.00060157      | 1.680E-11       |
| 15D01982                 | 4.6 %  | ✓ 6.160737 | 0.006933 | 1.029155  | 0.006354 | 0.004108  | 0.000030 | 85.115         | 5.385183        | 1.00060163      | 1.393E-11       |
| 15D01983                 | 4.9 %  | ✓ 6.079221 | 0.005958 | 0.977296  | 0.005237 | 0.003936  | 0.000025 | 85.123         | 5.386069        | 1.00060169      | 1.854E-11       |
| 15D01985                 | 5.2 %  | ✓ 5.943806 | 0.005257 | 0.933947  | 0.004313 | 0.003478  | 0.000020 | 85.140         | 5.387916        | 1.00060181      | 2.225E-11       |
| 15D01986                 | 5.5 %  | ✓ 5.802644 | 0.004761 | 0.884954  | 0.003852 | 0.003042  | 0.000017 | 85.149         | 5.388877        | 1.00060188      | 2.903E-11       |
| 15D01987                 | 5.8 %  | ✓ 5.632220 | 0.004515 | 0.831306  | 0.003473 | 0.002464  | 0.000013 | 85.158         | 5.389764        | 1.00060194      | 3.195E-11       |
| 15D01989                 | 6.1 %  | 5.481946   | 0.004409 | 0.786970  | 0.003323 | 0.002031  | 0.000013 | 85.175         | 5.391613        | 1.00060206      | 3.229E-11       |
| 15D01990                 | 6.5 %  | 5.375198   | 0.004263 | 0.743729  | 0.003217 | 0.001724  | 0.000012 | 85.184         | 5.392574        | 1.00060212      | 3.298E-11       |
| 15D01991                 | 7.0 %  | 5.302982   | 0.004065 | 0.695569  | 0.002760 | 0.001520  | 0.000009 | 85.192         | 5.393462        | 1.00060218      | 4.117E-11       |
| 15D01993                 | 7.6 %  | 5.195726   | 0.003870 | 0.638964  | 0.002397 | 0.001203  | 0.000007 | 85.210         | 5.395312        | 1.00060230      | 5.790E-11       |
| 15D01994                 | 8.4 %  | 5.078941   | 0.003719 | 0.587909  | 0.002137 | 0.000887  | 0.000006 | 85.219         | 5.396274        | 1.00060237      | 6.828E-11       |
| 15D01995                 | 9.4 %  | 5.013457   | 0.003627 | 0.540425  | 0.001925 | 0.000719  | 0.000005 | 85.227         | 5.397162        | 1.00060243      | 8.737E-11       |
| 15D01997                 | 10.5 % | 4.963707   | 0.003580 | 0.502313  | 0.001791 | 0.000629  | 0.000004 | 85.244         | 5.399013        | 1.00060255      | 9.397E-11       |
| 15D01998                 | 11.7 % | 4.923317   | 0.003551 | 0.471767  | 0.001682 | 0.000558  | 0.000004 | 85.253         | 5.399902        | 1.00060261      | 9.445E-11       |
| 15D01999                 | 13.1 % | 4.898958   | 0.003542 | 0.455503  | 0.001671 | 0.000547  | 0.000004 | 85.262         | 5.400865        | 1.00060267      | 8.316E-11       |
| 15D02001                 | 14.7 % | 4.895327   | 0.003550 | 0.488956  | 0.001793 | 0.000638  | 0.000005 | 85.279         | 5.402718        | 1.00060279      | 7.404E-11       |
| 15D02002                 | 16.5 % | 4.888769   | 0.003592 | 0.604320  | 0.002229 | 0.000802  | 0.000005 | 85.288         | 5.403681        | 1.00060286      | 6.121E-11       |
| 15D02003                 | 18.3 % | 4.874540   | 0.003653 | 0.829853  | 0.003009 | 0.001031  | 0.000007 | 85.297         | 5.404571        | 1.00060292      | 4.789E-11       |
| 15D02005                 | 20.2 % | 4.859118   | 0.003764 | 0.872705  | 0.003338 | 0.001115  | 0.000009 | 85.315         | 5.406498        | 1.00060304      | 3.590E-11       |
| 15D02006                 | 22.2 % | 4.822974   | 0.003918 | 1.230068  | 0.004611 | 0.001186  | 0.000010 | 85.324         | 5.407463        | 1.00060311      | 2.721E-11       |
| 15D02008                 | 24.5 % | 4.781249   | 0.004052 | 1.749460  | 0.006416 | 0.001385  | 0.000012 | 85.341         | 5.409317        | 1.00060323      | 2.279E-11       |



| Procedure<br>Blanks |        | 36Ar<br>[fA] | 1σ        | 37Ar<br>[fA] | 1σ        | 38Ar<br>[fA] | 1σ        | 39Ar<br>[fA] | 1σ        | 40Ar<br>[fA] | 1σ        |
|---------------------|--------|--------------|-----------|--------------|-----------|--------------|-----------|--------------|-----------|--------------|-----------|
| 15D01958            | 1.9 %  | 0.0092012    | 0.0005732 | 0.0110357    | 0.0338245 | 0.0643890    | 0.0268936 | 0.0053763    | 0.0246853 | 2.6073124    | 0.0742115 |
| 15D01959            | 2.0 %  | 0.0091929    | 0.0005732 | 0.0101283    | 0.0338245 | 0.0753113    | 0.0268936 | 0.0041184    | 0.0246853 | 2.6057828    | 0.0742115 |
| 15D01961            | 2.1 %  | 0.0091780    | 0.0005732 | 0.0084950    | 0.0338245 | 0.0894364    | 0.0268936 | 0.0018542    | 0.0246853 | 2.6030296    | 0.0742115 |
| 15D01962            | 2.2 %  | 0.0091703    | 0.0005732 | 0.0076480    | 0.0338245 | 0.0943721    | 0.0268936 | 0.0006802    | 0.0246853 | 2.6016019    | 0.0742115 |
| 15D01963            | 2.3 %  | 0.0091626    | 0.0005732 | 0.0068011    | 0.0338245 | 0.0979359    | 0.0268936 | 0.0004939    | 0.0246853 | 2.6001743    | 0.0742115 |
| 15D01965            | 2.4 %  | 0.0091482    | 0.0005732 | 0.0052283    | 0.0338245 | 0.1015354    | 0.0268936 | 0.0026742    | 0.0246853 | 2.5975230    | 0.0742115 |
| 15D01966            | 2.5 %  | 0.0091405    | 0.0005732 | 0.0043813    | 0.0338245 | 0.1021578    | 0.0268936 | 0.0038482    | 0.0246853 | 2.5960954    | 0.0742115 |
| 15D01967            | 2.6 %  | 0.0091333    | 0.0005732 | 0.0035949    | 0.0338245 | 0.1020865    | 0.0268936 | 0.0049384    | 0.0246853 | 2.5947697    | 0.0742115 |
| 15D01969            | 2.7 %  | 0.0091190    | 0.0005732 | 0.0020221    | 0.0338245 | 0.1005256    | 0.0268936 | 0.0071188    | 0.0246853 | 2.5921184    | 0.0742115 |
| 15D01970            | 2.8 %  | 0.0091119    | 0.0005732 | 0.0012356    | 0.0338245 | 0.0992391    | 0.0268936 | 0.0082089    | 0.0246853 | 2.5907928    | 0.0742115 |
| 15D01971            | 2.9 %  | 0.0091047    | 0.0005732 | 0.0004492    | 0.0338245 | 0.0977370    | 0.0268936 | 0.0092991    | 0.0246853 | 2.5894671    | 0.0742115 |
| 15D01973            | 3.0 %  | 0.0090909    | 0.0005732 | 0.00010631   | 0.0338245 | 0.0945342    | 0.0268936 | 0.0113956    | 0.0246853 | 2.5869178    | 0.0742115 |
| 15D01974            | 3.2 %  | 0.0090837    | 0.0005732 | 0.0018496    | 0.0338245 | 0.0928374    | 0.0268936 | 0.0124858    | 0.0246853 | 2.5855921    | 0.0742115 |
| 15D01975            | 3.4 %  | 0.0090771    | 0.0005732 | 0.0025755    | 0.0338245 | 0.0913196    | 0.0268936 | 0.0134921    | 0.0246853 | 2.5843684    | 0.0742115 |
| 15D01977            | 3.6 %  | 0.0090633    | 0.0005732 | 0.0040879    | 0.0338245 | 0.0884734    | 0.0268936 | 0.0155886    | 0.0246853 | 2.5818191    | 0.0742115 |
| 15D01978            | 3.8 %  | 0.0090562    | 0.0005732 | 0.0048743    | 0.0338245 | 0.0872323    | 0.0268936 | 0.0166788    | 0.0246853 | 2.5804935    | 0.0742115 |
| 15D01979            | 4.0 %  | 0.0090496    | 0.0005732 | 0.0056002    | 0.0338245 | 0.0862634    | 0.0268936 | 0.0176851    | 0.0246853 | 2.5792698    | 0.0742115 |
| 15D01981            | 4.3 %  | 0.0090358    | 0.0005732 | 0.0071126    | 0.0338245 | 0.0848458    | 0.0268936 | 0.0197816    | 0.0246853 | 2.5767205    | 0.0742115 |
| 15D01982            | 4.6 %  | 0.0090286    | 0.0005732 | 0.0078990    | 0.0338245 | 0.0844407    | 0.0268936 | 0.0208717    | 0.0246853 | 2.5753948    | 0.0742115 |
| 15D01983            | 4.9 %  | 0.0090220    | 0.0005732 | 0.0086249    | 0.0338245 | 0.0842643    | 0.0268936 | 0.0218780    | 0.0246853 | 2.5741711    | 0.0742115 |
| 15D01985            | 5.2 %  | 0.0090082    | 0.0005732 | 0.0101373    | 0.0338245 | 0.0844511    | 0.0268936 | 0.0239745    | 0.0246853 | 2.5716218    | 0.0742115 |
| 15D01986            | 5.5 %  | 0.0090010    | 0.0005732 | 0.0109237    | 0.0338245 | 0.0847965    | 0.0268936 | 0.0250647    | 0.0246853 | 2.5702961    | 0.0742115 |
| 15D01987            | 5.8 %  | 0.0089944    | 0.0005732 | 0.0116497    | 0.0338245 | 0.0852260    | 0.0268936 | 0.0260710    | 0.0246853 | 2.5690725    | 0.0742115 |
| 15D01989            | 6.1 %  | 0.0089807    | 0.0005732 | 0.0131620    | 0.0338245 | 0.0862971    | 0.0268936 | 0.0281675    | 0.0246853 | 2.5665231    | 0.0742115 |
| 15D01990            | 6.5 %  | 0.0089735    | 0.0005732 | 0.0139484    | 0.0338245 | 0.0868413    | 0.0268936 | 0.0292577    | 0.0246853 | 2.5651975    | 0.0742115 |
| 15D01991            | 7.0 %  | 0.0089669    | 0.0005732 | 0.0146744    | 0.0338245 | 0.0872601    | 0.0268936 | 0.0302640    | 0.0246853 | 2.5639738    | 0.0742115 |
| 15D01993            | 7.6 %  | 0.0089531    | 0.0005732 | 0.0161867    | 0.0338245 | 0.0875991    | 0.0268936 | 0.0323605    | 0.0246853 | 2.5614245    | 0.0742115 |
| 15D01994            | 8.4 %  | 0.0089459    | 0.0005732 | 0.0169732    | 0.0338245 | 0.0873247    | 0.0268936 | 0.0334507    | 0.0246853 | 2.5600988    | 0.0742115 |
| 15D01995            | 9.4 %  | 0.0089393    | 0.0005732 | 0.0176991    | 0.0338245 | 0.0866860    | 0.0268936 | 0.0344570    | 0.0246853 | 2.5588751    | 0.0742115 |
| 15D01997            | 10.5 % | 0.0089255    | 0.0005732 | 0.0192115    | 0.0338245 | 0.0837806    | 0.0268936 | 0.0365535    | 0.0246853 | 2.5563258    | 0.0742115 |
| 15D01998            | 11.7 % | 0.0089189    | 0.0005732 | 0.0199374    | 0.0338245 | 0.0814324    | 0.0268936 | 0.0375598    | 0.0246853 | 2.5551021    | 0.0742115 |
| 15D01999            | 13.1 % | 0.0089117    | 0.0005732 | 0.0207238    | 0.0338245 | 0.0780309    | 0.0268936 | 0.0386500    | 0.0246853 | 2.5537765    | 0.0742115 |
| 15D02001            | 14.7 % | 0.0088980    | 0.0005732 | 0.0222362    | 0.0338245 | 0.0684728    | 0.0268936 | 0.0407464    | 0.0246853 | 2.5512271    | 0.0742115 |
| 15D02002            | 16.5 % | 0.0088908    | 0.0005732 | 0.0230226    | 0.0338245 | 0.0616447    | 0.0268936 | 0.0418366    | 0.0246853 | 2.5499015    | 0.0742115 |
| 15D02003            | 18.3 % | 0.0088842    | 0.0005732 | 0.0237485    | 0.0338245 | 0.0540301    | 0.0268936 | 0.0428429    | 0.0246853 | 2.5486778    | 0.0742115 |
| 15D02005            | 20.2 % | 0.0088699    | 0.0005732 | 0.0253214    | 0.0338245 | 0.0325497    | 0.0268936 | 0.0450233    | 0.0246853 | 2.5460265    | 0.0742115 |
| 15D02006            | 22.2 % | 0.0088627    | 0.0005732 | 0.0261078    | 0.0338245 | 0.0188935    | 0.0268936 | 0.0461135    | 0.0246853 | 2.5447008    | 0.0742115 |
| 15D02008            | 24.5 % | 0.0088489    | 0.0005732 | 0.0276202    | 0.0338245 | 0.0137331    | 0.0268936 | 0.0482099    | 0.0246853 | 2.5421515    | 0.0742115 |



| OSU Argon Geochronology Lab |        |           |           |        |                |         |        |        |                |           |           |        |                |          |        |        |                |          |       |        |                |      |    |    |  |
|-----------------------------|--------|-----------|-----------|--------|----------------|---------|--------|--------|----------------|-----------|-----------|--------|----------------|----------|--------|--------|----------------|----------|-------|--------|----------------|------|----|----|--|
| Intercept<br>Values         | 36Ar   |           |           |        |                | 37Ar    |        |        |                |           | 38Ar      |        |                |          |        | 39Ar   |                |          |       |        | 40Ar           |      |    |    |  |
|                             |        | [fA]      | 1σ        | r2     |                |         | [fA]   | 1σ     | r2             |           |           | [fA]   | 1σ             | r2       |        |        | [fA]           | 1σ       | r2    |        |                | [fA] | 1σ | r2 |  |
| 15D01958                    | 1.9 %  | 1.4520895 | 0.0030131 | 0.9024 | EXP 150 of 150 | 2.5412  | 0.0314 | 0.1169 | EXP 150 of 150 | 0.4690242 | 0.0254528 | 0.0499 | EXP 149 of 150 | 14.3689  | 0.0233 | 0.9305 | EXP 150 of 150 | 548.339  | 0.061 | 0.9991 | EXP 150 of 150 |      |    |    |  |
| 15D01959                    | 2.0 %  | 0.5573651 | 0.0017214 | 0.7758 | EXP 150 of 150 | 2.1310  | 0.0303 | 0.0957 | EXP 150 of 150 | 0.1668399 | 0.0267374 | 0.0003 | EXP 150 of 150 | 10.7485  | 0.0271 | 0.8420 | EXP 150 of 150 | 236.777  | 0.045 | 0.9960 | EXP 150 of 150 |      |    |    |  |
| 15D01961                    | 2.1 %  | 0.4202284 | 0.0016165 | 0.6660 | EXP 150 of 150 | 2.3704  | 0.0318 | 0.1233 | EXP 150 of 150 | 0.0802804 | 0.0260404 | 0.0187 | EXP 150 of 150 | 11.4486  | 0.0237 | 0.8854 | EXP 150 of 150 | 193.437  | 0.043 | 0.9937 | EXP 150 of 150 |      |    |    |  |
| 15D01962                    | 2.2 %  | 0.4086562 | 0.0015428 | 0.6796 | EXP 150 of 150 | 3.0116  | 0.0329 | 0.1911 | EXP 150 of 150 | 0.1666318 | 0.0273396 | 0.0000 | EXP 150 of 150 | 14.6332  | 0.0275 | 0.9123 | EXP 150 of 150 | 204.227  | 0.036 | 0.9964 | EXP 150 of 150 |      |    |    |  |
| 15D01963                    | 2.3 %  | 0.3144289 | 0.0013718 | 0.5585 | EXP 150 of 150 | 3.0158  | 0.0300 | 0.2764 | EXP 150 of 150 | 0.1537904 | 0.0248748 | 0.0002 | EXP 150 of 150 | 14.2273  | 0.0223 | 0.9398 | EXP 150 of 150 | 170.180  | 0.041 | 0.9909 | EXP 150 of 150 |      |    |    |  |
| 15D01965                    | 2.4 %  | 0.2730641 | 0.0011623 | 0.4857 | EXP 150 of 150 | 3.1300  | 0.0301 | 0.2763 | EXP 150 of 150 | 0.1668535 | 0.0305445 | 0.0163 | EXP 150 of 150 | 14.7686  | 0.0270 | 0.9214 | EXP 150 of 150 | 160.674  | 0.038 | 0.9909 | EXP 150 of 150 |      |    |    |  |
| 15D01966                    | 2.5 %  | 0.2256621 | 0.0012158 | 0.3974 | EXP 150 of 150 | 2.9692  | 0.0281 | 0.2111 | EXP 150 of 150 | 0.1329167 | 0.0271811 | 0.0002 | EXP 150 of 150 | 14.0620  | 0.0259 | 0.9229 | EXP 150 of 150 | 140.408  | 0.037 | 0.9847 | EXP 150 of 150 |      |    |    |  |
| 15D01967                    | 2.6 %  | 0.2087414 | 0.0010711 | 0.3553 | EXP 150 of 150 | 3.1451  | 0.0301 | 0.2481 | EXP 150 of 150 | 0.1543249 | 0.0264936 | 0.0126 | EXP 150 of 150 | 14.8102  | 0.0259 | 0.9303 | EXP 149 of 150 | 139.160  | 0.040 | 0.9816 | EXP 150 of 150 |      |    |    |  |
| 15D01969                    | 2.7 %  | 0.1758097 | 0.0009358 | 0.2032 | EXP 149 of 150 | 3.0289  | 0.0287 | 0.2444 | EXP 150 of 150 | 0.1161638 | 0.0299928 | 0.0020 | EXP 150 of 150 | 14.4395  | 0.0264 | 0.9217 | EXP 150 of 150 | 127.041  | 0.040 | 0.9755 | EXP 150 of 150 |      |    |    |  |
| 15D01970                    | 2.8 %  | 0.1639541 | 0.0009511 | 0.1148 | EXP 150 of 150 | 3.2706  | 0.0297 | 0.2340 | EXP 150 of 150 | 0.1116169 | 0.0255692 | 0.0101 | EXP 150 of 150 | 15.7038  | 0.0255 | 0.9335 | EXP 149 of 150 | 129.530  | 0.038 | 0.9786 | EXP 150 of 150 |      |    |    |  |
| 15D01971                    | 2.9 %  | 0.1671260 | 0.0009709 | 0.2581 | EXP 150 of 150 | 3.5188  | 0.0302 | 0.2044 | EXP 150 of 150 | 0.1310572 | 0.0256320 | 0.0061 | EXP 150 of 150 | 17.1715  | 0.0251 | 0.9505 | EXP 150 of 150 | 136.159  | 0.041 | 0.9807 | EXP 150 of 150 |      |    |    |  |
| 15D01973                    | 3.0 %  | 0.1866862 | 0.0009339 | 0.3479 | EXP 150 of 150 | 4.2360  | 0.0292 | 0.3376 | EXP 150 of 150 | 0.2183823 | 0.0264473 | 0.0005 | EXP 150 of 150 | 20.6269  | 0.0237 | 0.9675 | EXP 150 of 150 | 160.225  | 0.039 | 0.9913 | EXP 150 of 150 |      |    |    |  |
| 15D01974                    | 3.2 %  | 0.1956304 | 0.0009457 | 0.1823 | EXP 149 of 150 | 4.9931  | 0.0290 | 0.4608 | EXP 150 of 150 | 0.2709267 | 0.0245997 | 0.0220 | EXP 149 of 150 | 24.5244  | 0.0259 | 0.9737 | EXP 150 of 150 | 182.281  | 0.042 | 0.9931 | EXP 150 of 150 |      |    |    |  |
| 15D01975                    | 3.4 %  | 0.1271319 | 0.0008576 | 0.0252 | EXP 150 of 150 | 3.6536  | 0.0296 | 0.3007 | EXP 150 of 150 | 0.1498358 | 0.0273214 | 0.0093 | EXP 150 of 150 | 17.6589  | 0.0261 | 0.9468 | EXP 150 of 150 | 127.058  | 0.036 | 0.9789 | EXP 150 of 150 |      |    |    |  |
| 15D01977                    | 3.6 %  | 0.1999001 | 0.0010335 | 0.3570 | EXP 150 of 150 | 5.7733  | 0.0315 | 0.4831 | EXP 150 of 150 | 0.3362273 | 0.0264636 | 0.0218 | EXP 150 of 150 | 28.7948  | 0.0299 | 0.9750 | EXP 150 of 150 | 205.129  | 0.045 | 0.9950 | EXP 149 of 150 |      |    |    |  |
| 15D01978                    | 3.8 %  | 0.2102763 | 0.0009497 | 0.3349 | EXP 150 of 150 | 6.8072  | 0.0294 | 0.6338 | EXP 150 of 150 | 0.3789468 | 0.0278539 | 0.0187 | EXP 150 of 150 | 34.2891  | 0.0282 | 0.9836 | EXP 150 of 150 | 236.882  | 0.043 | 0.9970 | EXP 150 of 150 |      |    |    |  |
| 15D01979                    | 4.0 %  | 0.2717187 | 0.0011613 | 0.4897 | EXP 150 of 150 | 9.0203  | 0.0333 | 0.7003 | EXP 150 of 150 | 0.5584953 | 0.0255139 | 0.0541 | EXP 150 of 150 | 47.0217  | 0.0273 | 0.9920 | EXP 150 of 150 | 318.043  | 0.051 | 0.9980 | EXP 150 of 150 |      |    |    |  |
| 15D01981                    | 4.3 %  | 0.2627029 | 0.0012525 | 0.4226 | EXP 150 of 150 | 10.2251 | 0.0322 | 0.7522 | EXP 150 of 150 | 0.5627064 | 0.0263255 | 0.0046 | EXP 150 of 150 | 54.6024  | 0.0305 | 0.9927 | EXP 150 of 150 | 353.541  | 0.051 | 0.9985 | EXP 150 of 150 |      |    |    |  |
| 15D01982                    | 4.6 %  | 0.1910024 | 0.0010498 | 0.0318 | EXP 150 of 150 | 8.8349  | 0.0304 | 0.7337 | EXP 150 of 150 | 0.4482969 | 0.0271514 | 0.0046 | EXP 150 of 150 | 46.7868  | 0.0298 | 0.9905 | EXP 150 of 150 | 293.528  | 0.043 | 0.9983 | EXP 150 of 150 |      |    |    |  |
| 15D01983                    | 4.9 %  | 0.2442274 | 0.0012047 | 0.2988 | EXP 150 of 150 | 11.3142 | 0.0329 | 0.8010 | EXP 150 of 150 | 0.7597691 | 0.0272559 | 0.0819 | EXP 150 of 150 | 63.1083  | 0.0321 | 0.9940 | EXP 150 of 150 | 389.871  | 0.049 | 0.9989 | EXP 150 of 150 |      |    |    |  |
| 15D01985                    | 5.2 %  | 0.2641496 | 0.0011193 | 0.3492 | EXP 150 of 150 | 13.2699 | 0.0255 | 0.8843 | EXP 150 of 150 | 0.8736550 | 0.0261725 | 0.0314 | EXP 150 of 150 | 77.4755  | 0.0296 | 0.9966 | EXP 150 of 150 | 467.466  | 0.054 | 0.9991 | EXP 150 of 150 |      |    |    |  |
| 15D01986                    | 5.5 %  | 0.3071840 | 0.0012830 | 0.3910 | EXP 150 of 150 | 16.7943 | 0.0330 | 0.8929 | EXP 150 of 150 | 1.1694993 | 0.0262173 | 0.0582 | EXP 150 of 150 | 103.5043 | 0.0318 | 0.9978 | EXP 150 of 150 | 608.943  | 0.065 | 0.9993 | EXP 150 of 150 |      |    |    |  |
| 15D01987                    | 5.8 %  | 0.2829420 | 0.0010019 | 0.2458 | EXP 150 of 150 | 17.8899 | 0.0303 | 0.9137 | EXP 150 of 150 | 1.3716936 | 0.0257846 | 0.1786 | EXP 150 of 150 | 117.3887 | 0.0337 | 0.9981 | EXP 150 of 150 | 670.097  | 0.061 | 0.9995 | EXP 150 of 150 |      |    |    |  |
| 15D01989                    | 6.1 %  | 0.2434494 | 0.0012086 | 0.0682 | EXP 150 of 150 | 17.5799 | 0.0310 | 0.9005 | EXP 150 of 150 | 1.3871633 | 0.0275843 | 0.1436 | EXP 150 of 150 | 121.8846 | 0.0364 | 0.9980 | EXP 150 of 150 | 677.162  | 0.065 | 0.9995 | EXP 150 of 150 |      |    |    |  |
| 15D01990                    | 6.5 %  | 0.2163242 | 0.0011010 | 0.0183 | EXP 149 of 150 | 17.3051 | 0.0341 | 0.8884 | EXP 150 of 150 | 1.4326285 | 0.0263996 | 0.1088 | EXP 150 of 150 | 126.9701 | 0.0344 | 0.9983 | EXP 150 of 150 | 691.624  | 0.071 | 0.9994 | EXP 150 of 150 |      |    |    |  |
| 15D01991                    | 7.0 %  | 0.2401583 | 0.0011089 | 0.0245 | EXP 150 of 150 | 20.4729 | 0.0293 | 0.9438 | EXP 150 of 150 | 1.8629236 | 0.0266390 | 0.1695 | EXP 150 of 150 | 160.6471 | 0.0372 | 0.9988 | EXP 150 of 150 | 862.709  | 0.075 | 0.9996 | EXP 150 of 150 |      |    |    |  |
| 15D01993                    | 7.6 %  | 0.2717503 | 0.0011801 | 0.0085 | EXP 150 of 150 | 26.9824 | 0.0338 | 0.9526 | EXP 150 of 150 | 2.6749242 | 0.0270039 | 0.2579 | EXP 150 of 150 | 230.5779 | 0.0462 | 0.9991 | EXP 150 of 150 | 1212.222 | 0.080 | 0.9998 | EXP 150 of 150 |      |    |    |  |
| 15D01994                    | 8.4 %  | 0.2426314 | 0.0012686 | 0.2324 | EXP 150 of 150 | 29.9429 | 0.0302 | 0.9691 | EXP 150 of 150 | 3.2139685 | 0.0276355 | 0.2722 | EXP 150 of 150 | 278.1506 | 0.0453 | 0.9994 | EXP 150 of 150 | 1429.026 | 0.089 | 0.9998 | EXP 150 of 150 |      |    |    |  |
| 15D01995                    | 9.4 %  | 0.2545021 | 0.0012744 | 0.4328 | EXP 150 of 150 | 35.6710 | 0.0335 | 0.9724 | EXP 150 of 150 | 4.1333243 | 0.0258411 | 0.4516 | EXP 149 of 150 | 360.5519 | 0.0493 | 0.9996 | EXP 150 of 150 | 1827.816 | 0.103 | 0.9998 | EXP 150 of 150 |      |    |    |  |
| 15D01997                    | 10.5 % | 0.2422133 | 0.0011975 | 0.6006 | EXP 150 of 150 | 36.0067 | 0.0347 | 0.9721 | EXP 150 of 150 | 4.5258355 | 0.0254854 | 0.5217 | EXP 150 of 150 | 391.6762 | 0.0504 | 0.9996 | EXP 150 of 150 | 1965.706 | 0.107 | 0.9999 | EXP 150 of 150 |      |    |    |  |
| 15D01998                    | 11.7 % | 0.2188097 | 0.0011842 | 0.6351 | EXP 150 of 150 | 34.2642 | 0.0312 | 0.9742 | EXP 149 of 150 | 4.5883135 | 0.0296787 | 0.4364 | EXP 150 of 150 | 396.9020 | 0.0516 | 0.9996 | EXP 150 of 150 | 1975.707 | 0.103 | 0.9999 | EXP 150 of 150 |      |    |    |  |
| 15D01999                    | 13.1 % | 0.1910193 | 0.0010986 | 0.6751 | EXP 150 of 150 | 29.2725 | 0.0322 | 0.9639 | EXP 150 of 150 | 4.1647576 | 0.0274108 | 0.4893 | EXP 150 of 150 | 351.2110 | 0.0459 | 0.9996 | EXP 150 of 150 | 1739.893 | 0.104 | 0.9998 | EXP 150 of 150 |      |    |    |  |
| 15D02001                    | 14.7 % | 0.1980615 | 0.0011291 | 0.5490 | EXP 150 of 150 | 27.9879 | 0.0290 | 0.9676 | EXP 150 of 150 | 3.6750733 | 0.0267702 | 0.3727 | EXP 149 of 150 | 312.9107 | 0.0427 | 0.9996 | EXP 150 of 150 | 1549.252 | 0.092 | 0.9998 | EXP 150 of 150 |      |    |    |  |
| 15D02002                    | 16.5 % | 0.2056596 | 0.0010020 | 0.4822 | EXP 150 of 150 | 28.6308 | 0.0324 | 0.9610 | EXP 150 of 150 | 3.1083604 | 0.0275173 | 0.2450 | EXP 150 of 150 | 259.0437 | 0.0436 | 0.9994 | EXP 150 of 150 | 1281.234 | 0.079 | 0.9998 | EXP 150 of 150 |      |    |    |  |
| 15D02003                    | 18.3 % | 0.2074095 | 0.0011167 | 0.1941 | EXP 150 of 150 | 30.8429 | 0.0308 | 0.9691 | EXP 150 of 150 | 2.4615705 | 0.0268748 | 0.1892 | EXP 150 of 150 | 203.2671 | 0.0413 | 0.9990 | EXP 150 of 150 | 1002.940 | 0.070 | 0.9997 | EXP 150 of 150 |      |    |    |  |
| 15D02005                    | 20.2 % | 0.1702181 | 0.0009816 | 0.1717 |                |         |        |        |                |           |           |        |                |          |        |        |                |          |       |        |                |      |    |    |  |



15D01957.full.xls printed at 06-07-2015 (15:10)  
ArArCALC v2.6.2 -- Beta Version

| Sample Parameters |        | Sample | Material   | Location          | Analyst     | Temp | Standard Name    | Standard (in Ma) | %1σ    | Standard Reference  | Standard 40Ar/39Ar | %1σ   | J          | %1σ   | Air 40Ar/36Ar | %1σ   | MDF (lin)   | %1σ   | Volume Ratio | Sensitivity (mol/volt) | Day | Month | Year | Hour | Min | Resist | Irradiation | X-pos | Y-pos | Z/H-pos |
|-------------------|--------|--------|------------|-------------------|-------------|------|------------------|------------------|--------|---------------------|--------------------|-------|------------|-------|---------------|-------|-------------|-------|--------------|------------------------|-----|-------|------|------|-----|--------|-------------|-------|-------|---------|
| 15D01958          | 1.9 %  | 154-4  | Groundmass | Kerguelen Plateau | Dan Miggins | 1.9  | FCT-NM (6C10-14) | 28.201           | 0.082  | Kuiper et al (2008) | 8.81342            | 0.242 | 0.00178335 | 0.242 | 303.3         | 0.162 | 0.993562412 | 0.070 | 1            | 4.8E-14                | 21  | JAN   | 2015 | 9    | 47  | 1      | 14-OSU-06   | 0.00  | 0.00  | 38.83   |
| 15D01959          | 2.0 %  | 154-4  | Groundmass | Kerguelen Plateau | Dan Miggins | 2    | FCT-NM (6C10-14) | 28.201           | 0.082  | Kuiper et al (2008) | 8.81342            | 0.242 | 0.00178335 | 0.242 | 303.3         | 0.162 | 0.993562412 | 0.070 | 1            | 4.8E-14                | 21  | JAN   | 2015 | 10   | 2   | 1      | 14-OSU-06   | 0.00  | 0.00  | 38.83   |
| 15D01961          | 2.1 %  | 154-4  | Groundmass | Kerguelen Plateau | Dan Miggins | 2.1  | FCT-NM (6C10-14) | 28.201           | 0.082  | Kuiper et al (2008) | 8.81342            | 0.242 | 0.00178335 | 0.242 | 303.3         | 0.162 | 0.993562412 | 0.070 | 1            | 4.8E-14                | 21  | JAN   | 2015 | 10   | 29  | 1      | 14-OSU-06   | 0.00  | 0.00  | 38.83   |
| 15D01962          | 2.2 %  | 154-4  | Groundmass | Kerguelen Plateau | Dan Miggins | 2.2  | FCT-NM (6C10-14) | 28.201           | 0.082  | Kuiper et al (2008) | 8.81342            | 0.242 | 0.00178335 | 0.242 | 303.3         | 0.162 | 0.993562412 | 0.070 | 1            | 4.8E-14                | 21  | JAN   | 2015 | 10   | 43  | 1      | 14-OSU-06   | 0.00  | 0.00  | 38.83   |
| 15D01963          | 2.3 %  | 154-4  | Groundmass | Kerguelen Plateau | Dan Miggins | 2.3  | FCT-NM (6C10-14) | 28.201           | 0.082  | Kuiper et al (2008) | 8.81342            | 0.242 | 0.00178335 | 0.242 | 303.3         | 0.162 | 0.993562412 | 0.070 | 1            | 4.8E-14                | 21  | JAN   | 2015 | 10   | 57  | 1      | 14-OSU-06   | 0.00  | 0.00  | 38.83   |
| 15D01965          | 2.4 %  | 154-4  | Groundmass | Kerguelen Plateau | Dan Miggins | 2.4  | FCT-NM (6C10-14) | 28.201           | 0.082  | Kuiper et al (2008) | 8.81342            | 0.242 | 0.00178335 | 0.242 | 303.3         | 0.162 | 0.993562412 | 0.070 | 1            | 4.8E-14                | 21  | JAN   | 2015 | 11   | 23  | 1      | 14-OSU-06   | 0.00  | 0.00  | 38.83   |
| 15D01966          | 2.5 %  | 154-4  | Groundmass | Kerguelen Plateau | Dan Miggins | 2.5  | FCT-NM (6C10-14) | 28.201           | 0.082  | Kuiper et al (2008) | 8.81342            | 0.242 | 0.00178335 | 0.242 | 303.3         | 0.162 | 0.993562412 | 0.070 | 1            | 4.8E-14                | 21  | JAN   | 2015 | 11   | 37  | 1      | 14-OSU-06   | 0.00  | 0.00  | 38.83   |
| 15D01967          | 2.6 %  | 154-4  | Groundmass | Kerguelen Plateau | Dan Miggins | 2.6  | FCT-NM (6C10-14) | 28.201           | 0.082  | Kuiper et al (2008) | 8.81342            | 0.242 | 0.00178335 | 0.242 | 303.3         | 0.162 | 0.993562412 | 0.070 | 1            | 4.8E-14                | 21  | JAN   | 2015 | 11   | 50  | 1      | 14-OSU-06   | 0.00  | 0.00  | 38.83   |
| 15D01969          | 2.7 %  | 154-4  | Groundmass | Kerguelen Plateau | Dan Miggins | 2.7  | FCT-NM (6C10-14) | 28.201           | 0.082  | Kuiper et al (2008) | 8.81342            | 0.242 | 0.00178335 | 0.242 | 303.3         | 0.162 | 0.993562412 | 0.070 | 1            | 4.8E-14                | 21  | JAN   | 2015 | 12   | 16  | 1      | 14-OSU-06   | 0.00  | 0.00  | 38.83   |
| 15D01970          | 2.8 %  | 154-4  | Groundmass | Kerguelen Plateau | Dan Miggins | 2.8  | FCT-NM (6C10-14) | 28.201           | 0.082  | Kuiper et al (2008) | 8.81342            | 0.242 | 0.00178335 | 0.242 | 303.3         | 0.162 | 0.993562412 | 0.070 | 1            | 4.8E-14                | 21  | JAN   | 2015 | 12   | 29  | 1      | 14-OSU-06   | 0.00  | 0.00  | 38.83   |
| 15D01971          | 2.9 %  | 154-4  | Groundmass | Kerguelen Plateau | Dan Miggins | 2.9  | FCT-NM (6C10-14) | 28.201           | 0.082  | Kuiper et al (2008) | 8.81342            | 0.242 | 0.00178335 | 0.242 | 303.3         | 0.162 | 0.993562412 | 0.070 | 1            | 4.8E-14                | 21  | JAN   | 2015 | 12   | 42  | 1      | 14-OSU-06   | 0.00  | 0.00  | 38.83   |
| 15D01973          | 3.0 %  | 154-4  | Groundmass | Kerguelen Plateau | Dan Miggins | 3    | FCT-NM (6C10-14) | 28.201           | 0.082  | Kuiper et al (2008) | 8.81342            | 0.242 | 0.00178335 | 0.242 | 303.3         | 0.162 | 0.993562412 | 0.070 | 1            | 4.8E-14                | 21  | JAN   | 2015 | 13   | 7   | 1      | 14-OSU-06   | 0.00  | 0.00  | 38.83   |
| 15D01974          | 3.2 %  | 154-4  | Groundmass | Kerguelen Plateau | Dan Miggins | 3.2  | FCT-NM (6C10-14) | 28.201           | 0.082  | Kuiper et al (2008) | 8.81342            | 0.242 | 0.00178335 | 0.242 | 303.3         | 0.162 | 0.993562412 | 0.070 | 1            | 4.8E-14                | 21  | JAN   | 2015 | 13   | 20  | 1      | 14-OSU-06   | 0.00  | 0.00  | 38.83   |
| 15D01975          | 3.4 %  | 154-4  | Groundmass | Kerguelen Plateau | Dan Miggins | 3.4  | FCT-NM (6C10-14) | 28.201           | 0.082  | Kuiper et al (2008) | 8.81342            | 0.242 | 0.00178335 | 0.242 | 303.3         | 0.162 | 0.993562412 | 0.070 | 1            | 4.8E-14                | 21  | JAN   | 2015 | 13   | 32  | 1      | 14-OSU-06   | 0.00  | 0.00  | 38.83   |
| 15D01977          | 3.6 %  | 154-4  | Groundmass | Kerguelen Plateau | Dan Miggins | 3.6  | FCT-NM (6C10-14) | 28.201           | 0.082  | Kuiper et al (2008) | 8.81342            | 0.242 | 0.00178335 | 0.242 | 303.3         | 0.162 | 0.993562412 | 0.070 | 1            | 4.8E-14                | 21  | JAN   | 2015 | 13   | 57  | 1      | 14-OSU-06   | 0.00  | 0.00  | 38.83   |
| 15D01978          | 3.8 %  | 154-4  | Groundmass | Kerguelen Plateau | Dan Miggins | 3.8  | FCT-NM (6C10-14) | 28.201           | 0.082  | Kuiper et al (2008) | 8.81342            | 0.242 | 0.00178335 | 0.242 | 303.3         | 0.162 | 0.993562412 | 0.070 | 1            | 4.8E-14                | 21  | JAN   | 2015 | 14   | 10  | 1      | 14-OSU-06   | 0.00  | 0.00  | 38.83   |
| 15D01979          | 4.0 %  | 154-4  | Groundmass | Kerguelen Plateau | Dan Miggins | 4    | FCT-NM (6C10-14) | 28.201           | 0.082  | Kuiper et al (2008) | 8.81342            | 0.242 | 0.00178335 | 0.242 | 303.3         | 0.162 | 0.993562412 | 0.070 | 1            | 4.8E-14                | 21  | JAN   | 2015 | 14   | 22  | 1      | 14-OSU-06   | 0.00  | 0.00  | 38.83   |
| 15D01981          | 4.3 %  | 154-4  | Groundmass | Kerguelen Plateau | Dan Miggins | 4.3  | FCT-NM (6C10-14) | 28.201           | 0.082  | Kuiper et al (2008) | 8.81342            | 0.242 | 0.00178335 | 0.242 | 303.3         | 0.162 | 0.993562412 | 0.070 | 1            | 4.8E-14                | 21  | JAN   | 2015 | 14   | 47  | 1      | 14-OSU-06   | 0.00  | 0.00  | 38.83   |
| 15D01982          | 4.6 %  | 154-4  | Groundmass | Kerguelen Plateau | Dan Miggins | 4.6  | FCT-NM (6C10-14) | 28.201           | 0.082  | Kuiper et al (2008) | 8.81342            | 0.242 | 0.00178335 | 0.242 | 303.3         | 0.162 | 0.993562412 | 0.070 | 1            | 4.8E-14                | 21  | JAN   | 2015 | 15   | 0   | 1      | 14-OSU-06   | 0.00  | 0.00  | 38.83   |
| 15D01983          | 4.9 %  | 154-4  | Groundmass | Kerguelen Plateau | Dan Miggins | 4.9  | FCT-NM (6C10-14) | 28.201           | 0.082  | Kuiper et al (2008) | 8.81342            | 0.242 | 0.00178335 | 0.242 | 303.3         | 0.162 | 0.993562412 | 0.070 | 1            | 4.8E-14                | 21  | JAN   | 2015 | 15   | 12  | 1      | 14-OSU-06   | 0.00  | 0.00  | 38.83   |
| 15D01985          | 5.2 %  | 154-4  | Groundmass | Kerguelen Plateau | Dan Miggins | 5.2  | FCT-NM (6C10-14) | 28.201           | 0.082  | Kuiper et al (2008) | 8.81342            | 0.242 | 0.00178335 | 0.242 | 303.3         | 0.162 | 0.993562412 | 0.070 | 1            | 4.8E-14                | 21  | JAN   | 2015 | 15   | 37  | 1      | 14-OSU-06   | 0.00  | 0.00  | 38.83   |
| 15D01986          | 5.5 %  | 154-4  | Groundmass | Kerguelen Plateau | Dan Miggins | 5.5  | FCT-NM (6C10-14) | 28.201           | 0.082  | Kuiper et al (2008) | 8.81342            | 0.242 | 0.00178335 | 0.242 | 303.3         | 0.162 | 0.993562412 | 0.070 | 1            | 4.8E-14                | 21  | JAN   | 2015 | 15   | 50  | 1      | 14-OSU-06   | 0.00  | 0.00  | 38.83   |
| 15D01987          | 5.8 %  | 154-4  | Groundmass | Kerguelen Plateau | Dan Miggins | 5.8  | FCT-NM (6C10-14) | 28.201           | 0.0816 | Kuiper et al (2008) | 8.81342            | 0.242 | 0.00178335 | 0.242 | 303.3         | 0.162 | 0.993562412 | 0.070 | 1            | 4.8E-14                | 21  | JAN   | 2015 | 16   | 2   | 1      | 14-OSU-06   | 0.00  | 0.00  | 38.83   |
| 15D01989          | 6.1 %  | 154-4  | Groundmass | Kerguelen Plateau | Dan Miggins | 6.1  | FCT-NM (6C10-14) | 28.201           | 0.0816 | Kuiper et al (2008) | 8.81342            | 0.242 | 0.00178335 | 0.242 | 303.3         | 0.162 | 0.993562412 | 0.070 | 1            | 4.8E-14                | 21  | JAN   | 2015 | 16   | 27  | 1      | 14-OSU-06   | 0.00  | 0.00  | 38.83   |
| 15D01990          | 6.5 %  | 154-4  | Groundmass | Kerguelen Plateau | Dan Miggins | 6.5  | FCT-NM (6C10-14) | 28.201           | 0.0816 | Kuiper et al (2008) | 8.81342            | 0.242 | 0.00178335 | 0.242 | 303.3         | 0.162 | 0.993562412 | 0.070 | 1            | 4.8E-14                | 21  | JAN   | 2015 | 16   | 40  | 1      | 14-OSU-06   | 0.00  | 0.00  | 38.83   |
| 15D01991          | 7.0 %  | 154-4  | Groundmass | Kerguelen Plateau | Dan Miggins | 7    | FCT-NM (6C10-14) | 28.201           | 0.0816 | Kuiper et al (2008) | 8.81342            | 0.242 | 0.00178335 | 0.242 | 303.3         | 0.162 | 0.993562412 | 0.070 | 1            | 4.8E-14                | 21  | JAN   | 2015 | 16   | 52  | 1      | 14-OSU-06   | 0.00  | 0.00  | 38.83   |
| 15D01993          | 7.6 %  | 154-4  | Groundmass | Kerguelen Plateau | Dan Miggins | 7.6  | FCT-NM (6C10-14) | 28.201           | 0.0816 | Kuiper et al (2008) | 8.81342            | 0.242 | 0.00178335 | 0.242 | 303.3         | 0.162 | 0.993562412 | 0.070 | 1            | 4.8E-14                | 21  | JAN   | 2015 | 17   | 17  | 1      | 14-OSU-06   | 0.00  | 0.00  | 38.83   |
| 15D01994          | 8.4 %  | 154-4  | Groundmass | Kerguelen Plateau | Dan Miggins | 8.4  | FCT-NM (6C10-14) | 28.201           | 0.0816 | Kuiper et al (2008) | 8.81342            | 0.242 | 0.00178335 | 0.242 | 303.3         | 0.162 | 0.993562412 | 0.070 | 1            | 4.8E-14                | 21  | JAN   | 2015 | 17   | 30  | 1      | 14-OSU-06   | 0.00  | 0.00  | 38.83   |
| 15D01995          | 9.4 %  | 154-4  | Groundmass | Kerguelen Plateau | Dan Miggins | 9.4  | FCT-NM (6C10-14) | 28.201           | 0.0816 | Kuiper et al (2008) | 8.81342            | 0.242 | 0.00178335 | 0.242 | 303.3         | 0.162 | 0.993562412 | 0.070 | 1            | 4.8E-14                | 21  | JAN   | 2015 | 17   | 42  | 1      | 14-OSU-06   | 0.00  | 0.00  | 38.83   |
| 15D01997          | 10.5 % | 154-4  | Groundmass | Kerguelen Plateau | Dan Miggins | 10.5 | FCT-NM (6C10-14) | 28.201           | 0.0816 | Kuiper et al (2008) | 8.81342            | 0.242 | 0.00178335 | 0.242 | 303.3         | 0.162 | 0.993562412 | 0.070 | 1            | 4.8E-14                | 21  | JAN   | 2015 | 18   | 7   | 1      | 14-OSU-06   | 0.00  | 0.00  | 38.83   |
| 15D01998          | 11.7 % | 154-4  | Groundmass | Kerguelen Plateau | Dan Miggins | 11.7 | FCT-NM (6C10-14) | 28.201           | 0.0816 | Kuiper et al (2008) | 8.81342            | 0.242 | 0.00178335 | 0.242 | 303.3         | 0.162 | 0.993562412 | 0.070 | 1            | 4.8E-14                | 21  | JAN   | 2015 | 18   | 19  | 1      | 14-OSU-06   | 0.00  | 0.00  | 38.83   |
| 15D01999          | 13.1 % | 154-4  | Groundmass | Kerguelen Plateau | Dan Miggins | 13.1 | FCT-NM (6C10-14) | 28.201           | 0.0816 | Kuiper et al (2008) | 8.81342            | 0.242 | 0.00178335 | 0.242 | 303.3         | 0.162 | 0.993562412 | 0.070 | 1            | 4.8E-14                | 21  | JAN   | 2015 | 18   | 32  | 1      | 14-OSU-06   | 0.00  | 0.00  | 38.83   |
| 15D02001          | 14.7 % | 154-4  | Groundmass | Kerguelen Plateau | Dan Miggins | 14.7 | FCT-NM (6C10-14) | 28.201           | 0.0816 | Kuiper et al (2008) | 8.81342            | 0.242 | 0.00178335 | 0.242 | 303.3         | 0.162 | 0.993562412 | 0.070 | 1            | 4.8E-14                | 21  | JAN   | 2015 | 18   | 57  | 1      | 14-OSU-06   | 0.00  | 0.00  | 38.83   |
| 15D02002          | 16.5 % | 154-4  | Groundmass | Kerguelen Plateau | Dan Miggins | 16.5 | FCT-NM (6C10-14) | 28.201           | 0.0816 | Kuiper et al (2008) | 8.81342            | 0.242 | 0.00178335 | 0.242 | 303.3         | 0.162 | 0.993562412 | 0.070 | 1            | 4.8E-14                | 21  | JAN   | 2015 | 19   | 10  | 1      | 14-OSU-06   | 0.00  | 0.00  | 38.83   |
| 15D02003          | 18.3 % | 154-4  | Groundmass | Kerguelen Plateau | Dan Miggins | 18.3 | FCT-NM (6C10-14) | 28.201           | 0.0816 | Kuiper et al (2008) | 8.81342            | 0.242 | 0.00178335 | 0.242 | 303.3         | 0.162 | 0.993562412 | 0.070 | 1            | 4.8E-14                | 21  | JAN   | 2015 | 19   | 22  | 1      | 14-OSU-06   | 0.00  | 0.00  | 38.83   |
| 15D02005          | 20.2 % | 154-4  | Groundmass | Kerguelen Plateau | Dan Miggins | 20.2 | FCT-NM (6C10-14) | 28.201           | 0.0816 | Kuiper et al (2008) | 8.81342            | 0.242 | 0.00178335 | 0.242 | 303.3         | 0.162 | 0.993562412 | 0.070 | 1            | 4.8E-14                | 21  | JAN   | 2015 | 19   | 48  | 1      | 14-OSU-06   | 0.00  | 0.00  | 38.83   |
| 15D02006          | 22.2 % | 154-4  | Groundmass | Kerguelen Plateau | Dan Miggins | 22.2 | FCT-NM (6C10-14) | 28.201           | 0.0816 | Kuiper et al (2008) | 8.81342            | 0.242 | 0.00178335 | 0.242 | 303.3         | 0.162 | 0.993562412 | 0.070 | 1            | 4.8E-14                | 21  | JAN   | 2015 | 20   | 1   | 1      | 14-OSU-06   | 0.00  | 0.00  | 38.83   |
| 15D02008          | 24.5 % | 154-4  | Groundmass | Kerguelen Plateau | Dan Miggins | 24.5 | FCT-NM (6C10-14) | 28.201           | 0.0816 | Kuiper et al (2008) | 8.81342            | 0.242 | 0.00178335 | 0.242 | 303.3         | 0.162 | 0.993562412 | 0.070 | 1            | 4.8E-14                | 21  | JAN   | 2015 | 20   | 26  | 1      | 14-OSU-06   | 0.00  | 0.00  | 38.83   |



[illegible]







15D01957.AGE >>> 154-4 >>> KERGUELEN | FALLOON (14-PIL-01) PROJECT

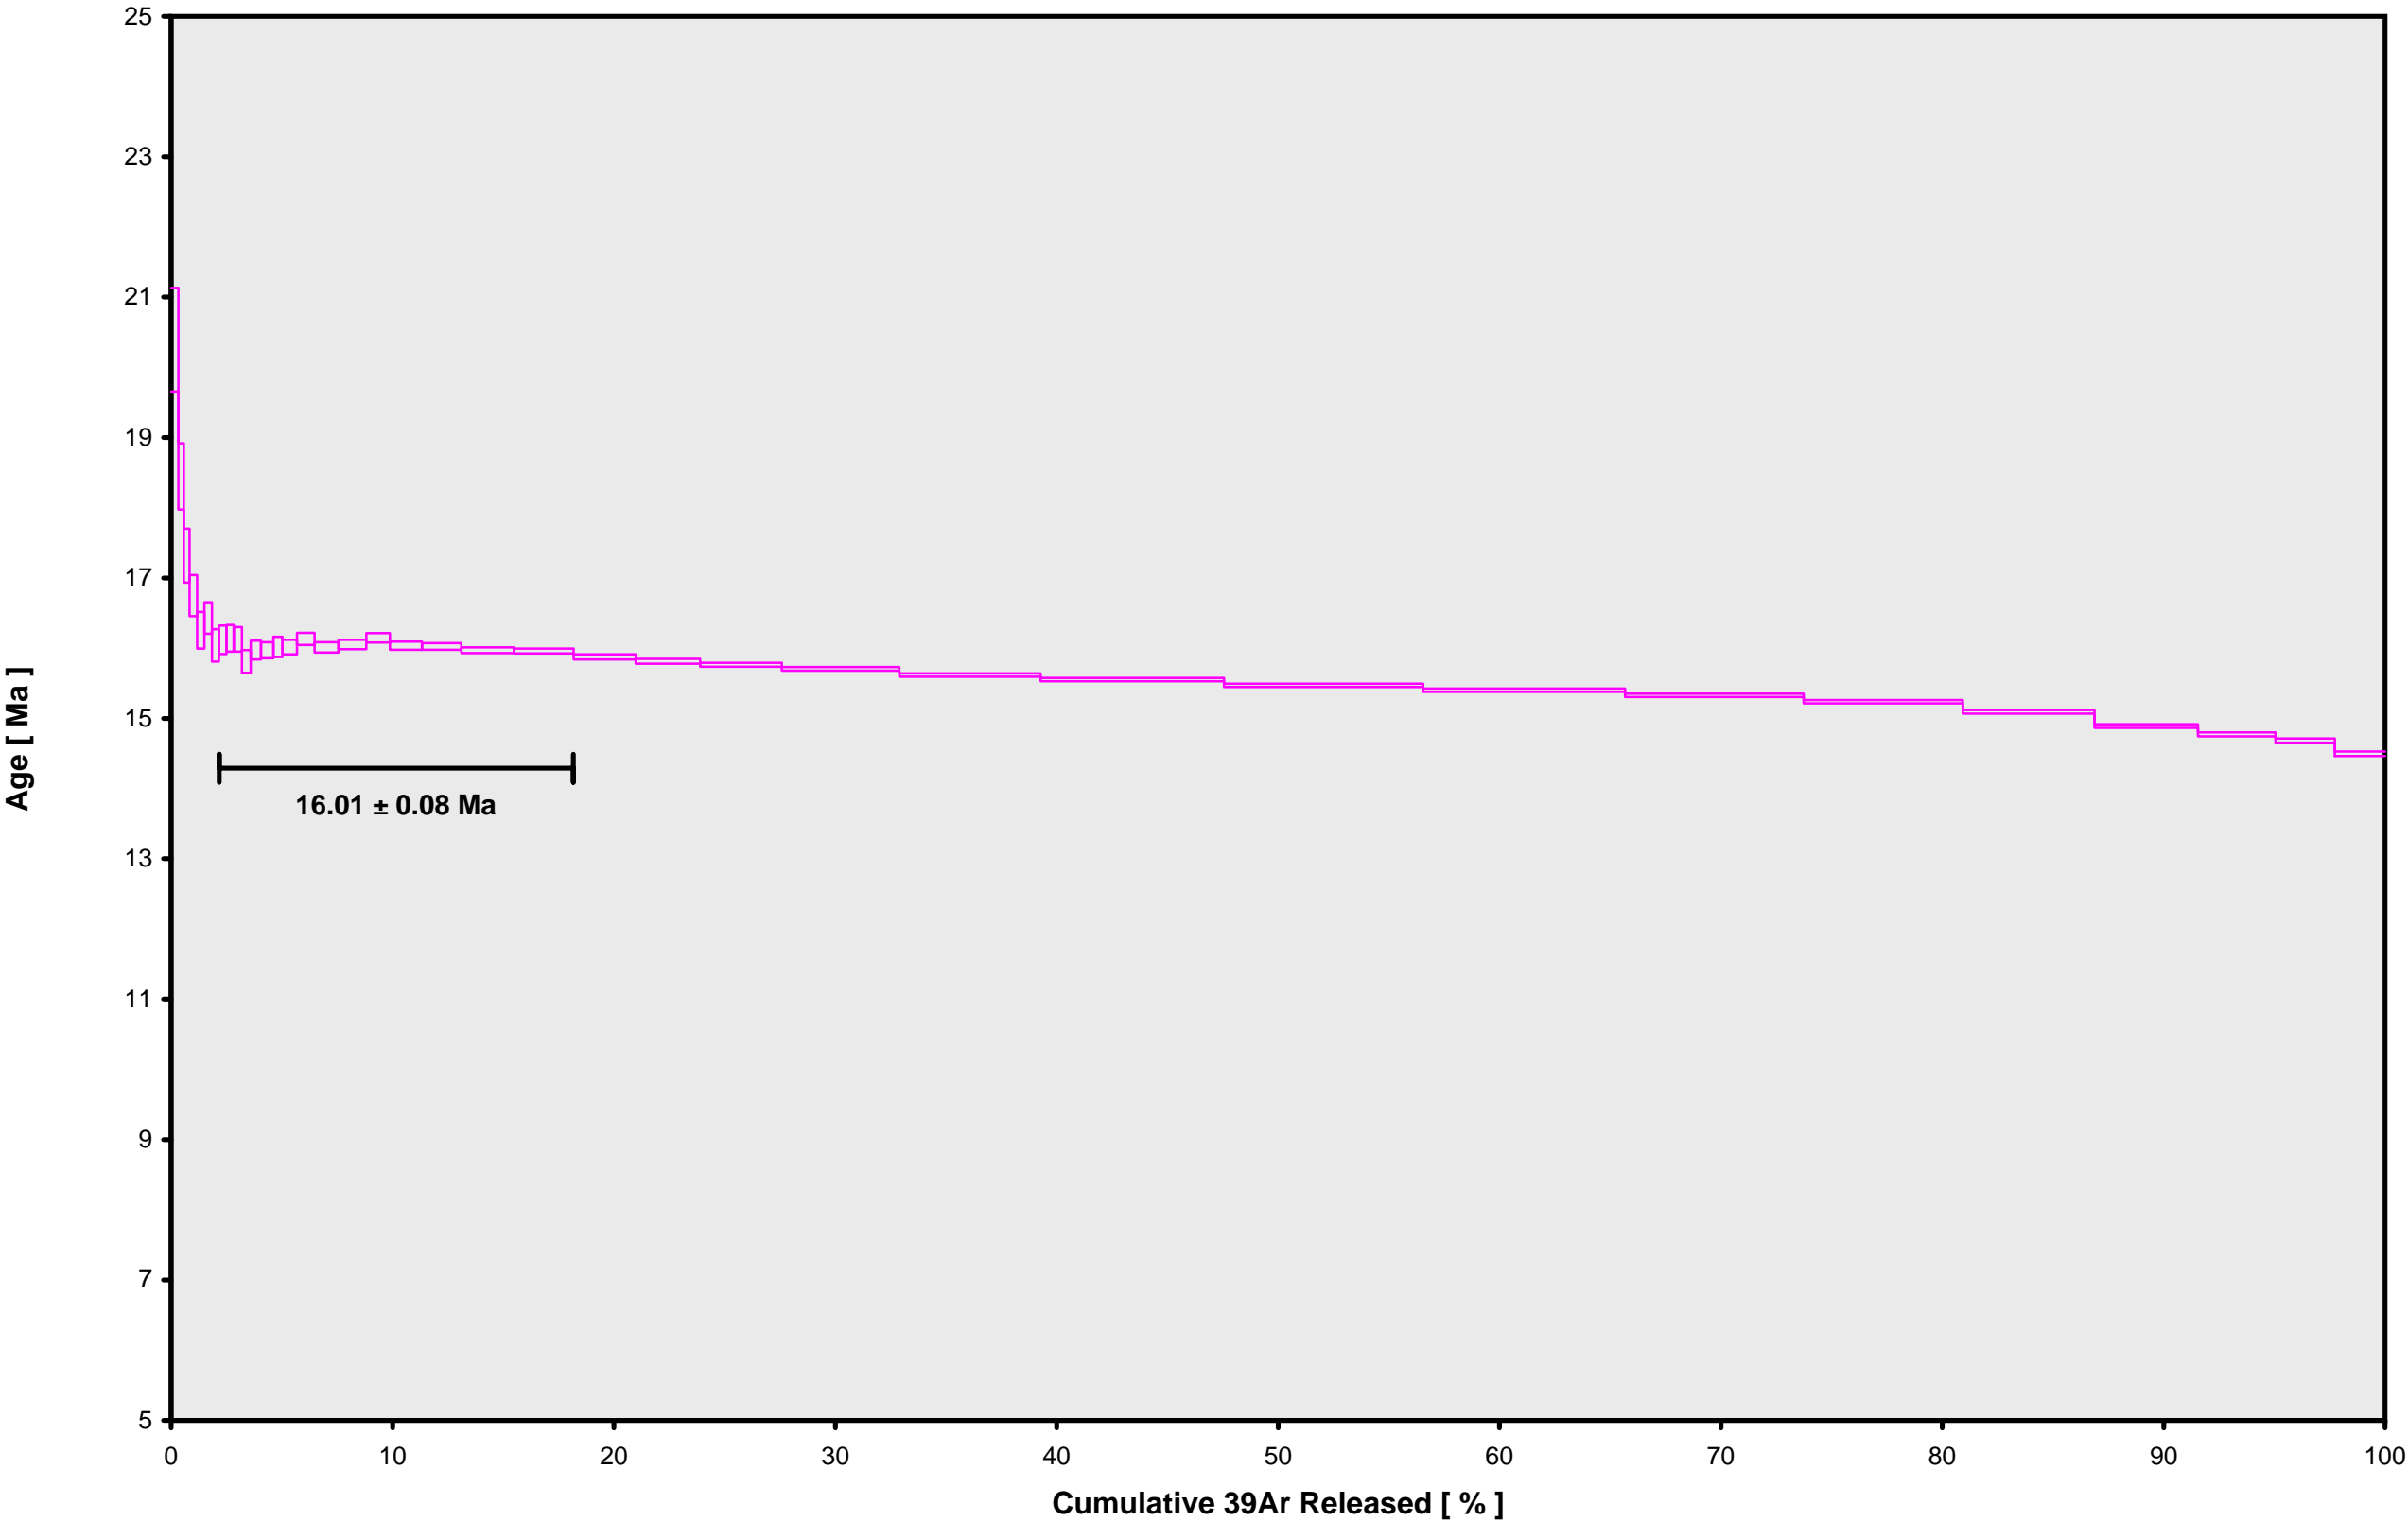

Ar-Ages in Ma

WEIGHTED PLATEAU

16.01 ± 0.08

TOTAL FUSION

15.51 ± 0.08

NORMAL ISOCHRON

15.97 ± 0.10

INVERSE ISOCHRON

15.97 ± 0.10

MSWD (PROBABILITY)

3.41 (0%)

Sample Info

Groundmass

Kerguelen Plateau

Dan Miggins

IRR = 14-OSU-06 (6C10-14)

J = 0.00178335 ± 0.00000432



15D01957.AGE >>> 154-4 >>> KERGUELEN | FALLOON (14-PIL-01) PROJECT

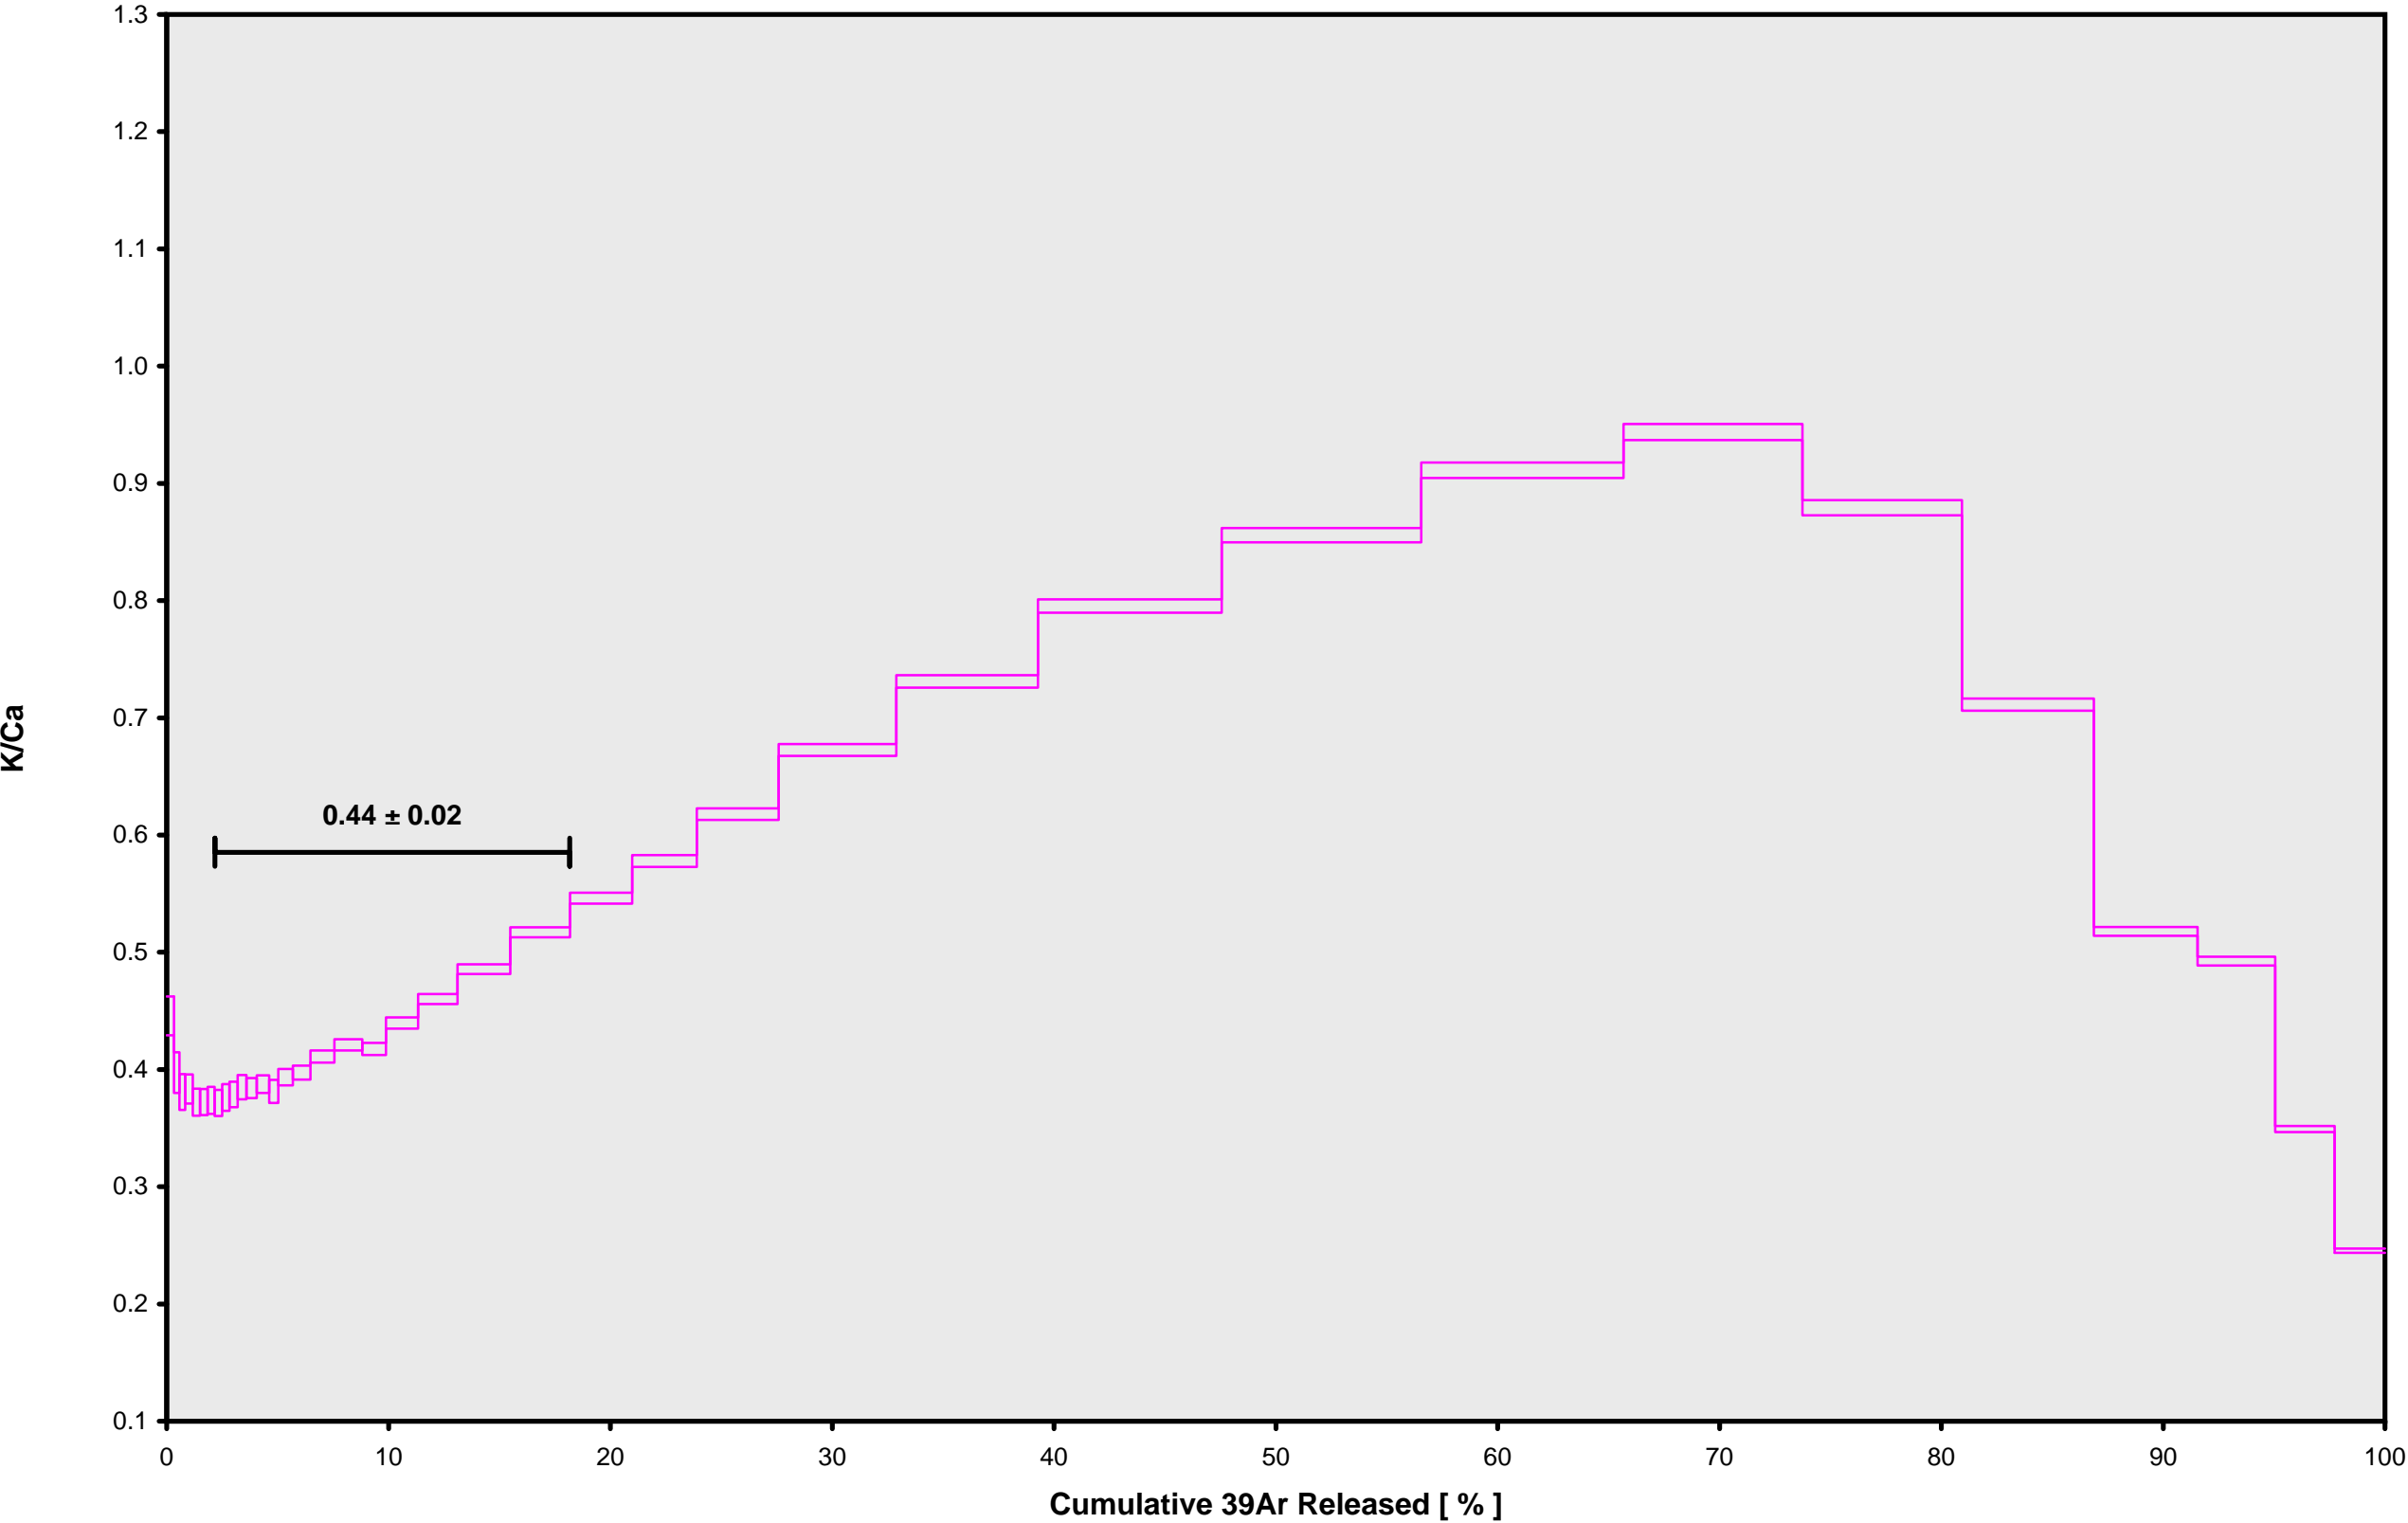

Ar-Ages in Ma

WEIGHTED PLATEAU  
16.01 ± 0.08  
TOTAL FUSION  
15.51 ± 0.08  
NORMAL ISOCHRON  
15.97 ± 0.10  
INVERSE ISOCHRON  
15.97 ± 0.10

Sample Info

Groundmass  
Kerguelen Plateau  
Dan Miggins  
  
IRR = 14-OSU-06 (6C10-14)  
J = 0.00178335 ± 0.00000432



15D01957.AGE >>> 154-4 >>> KERGUELEN | FALLOON (14-PIL-01) PROJECT

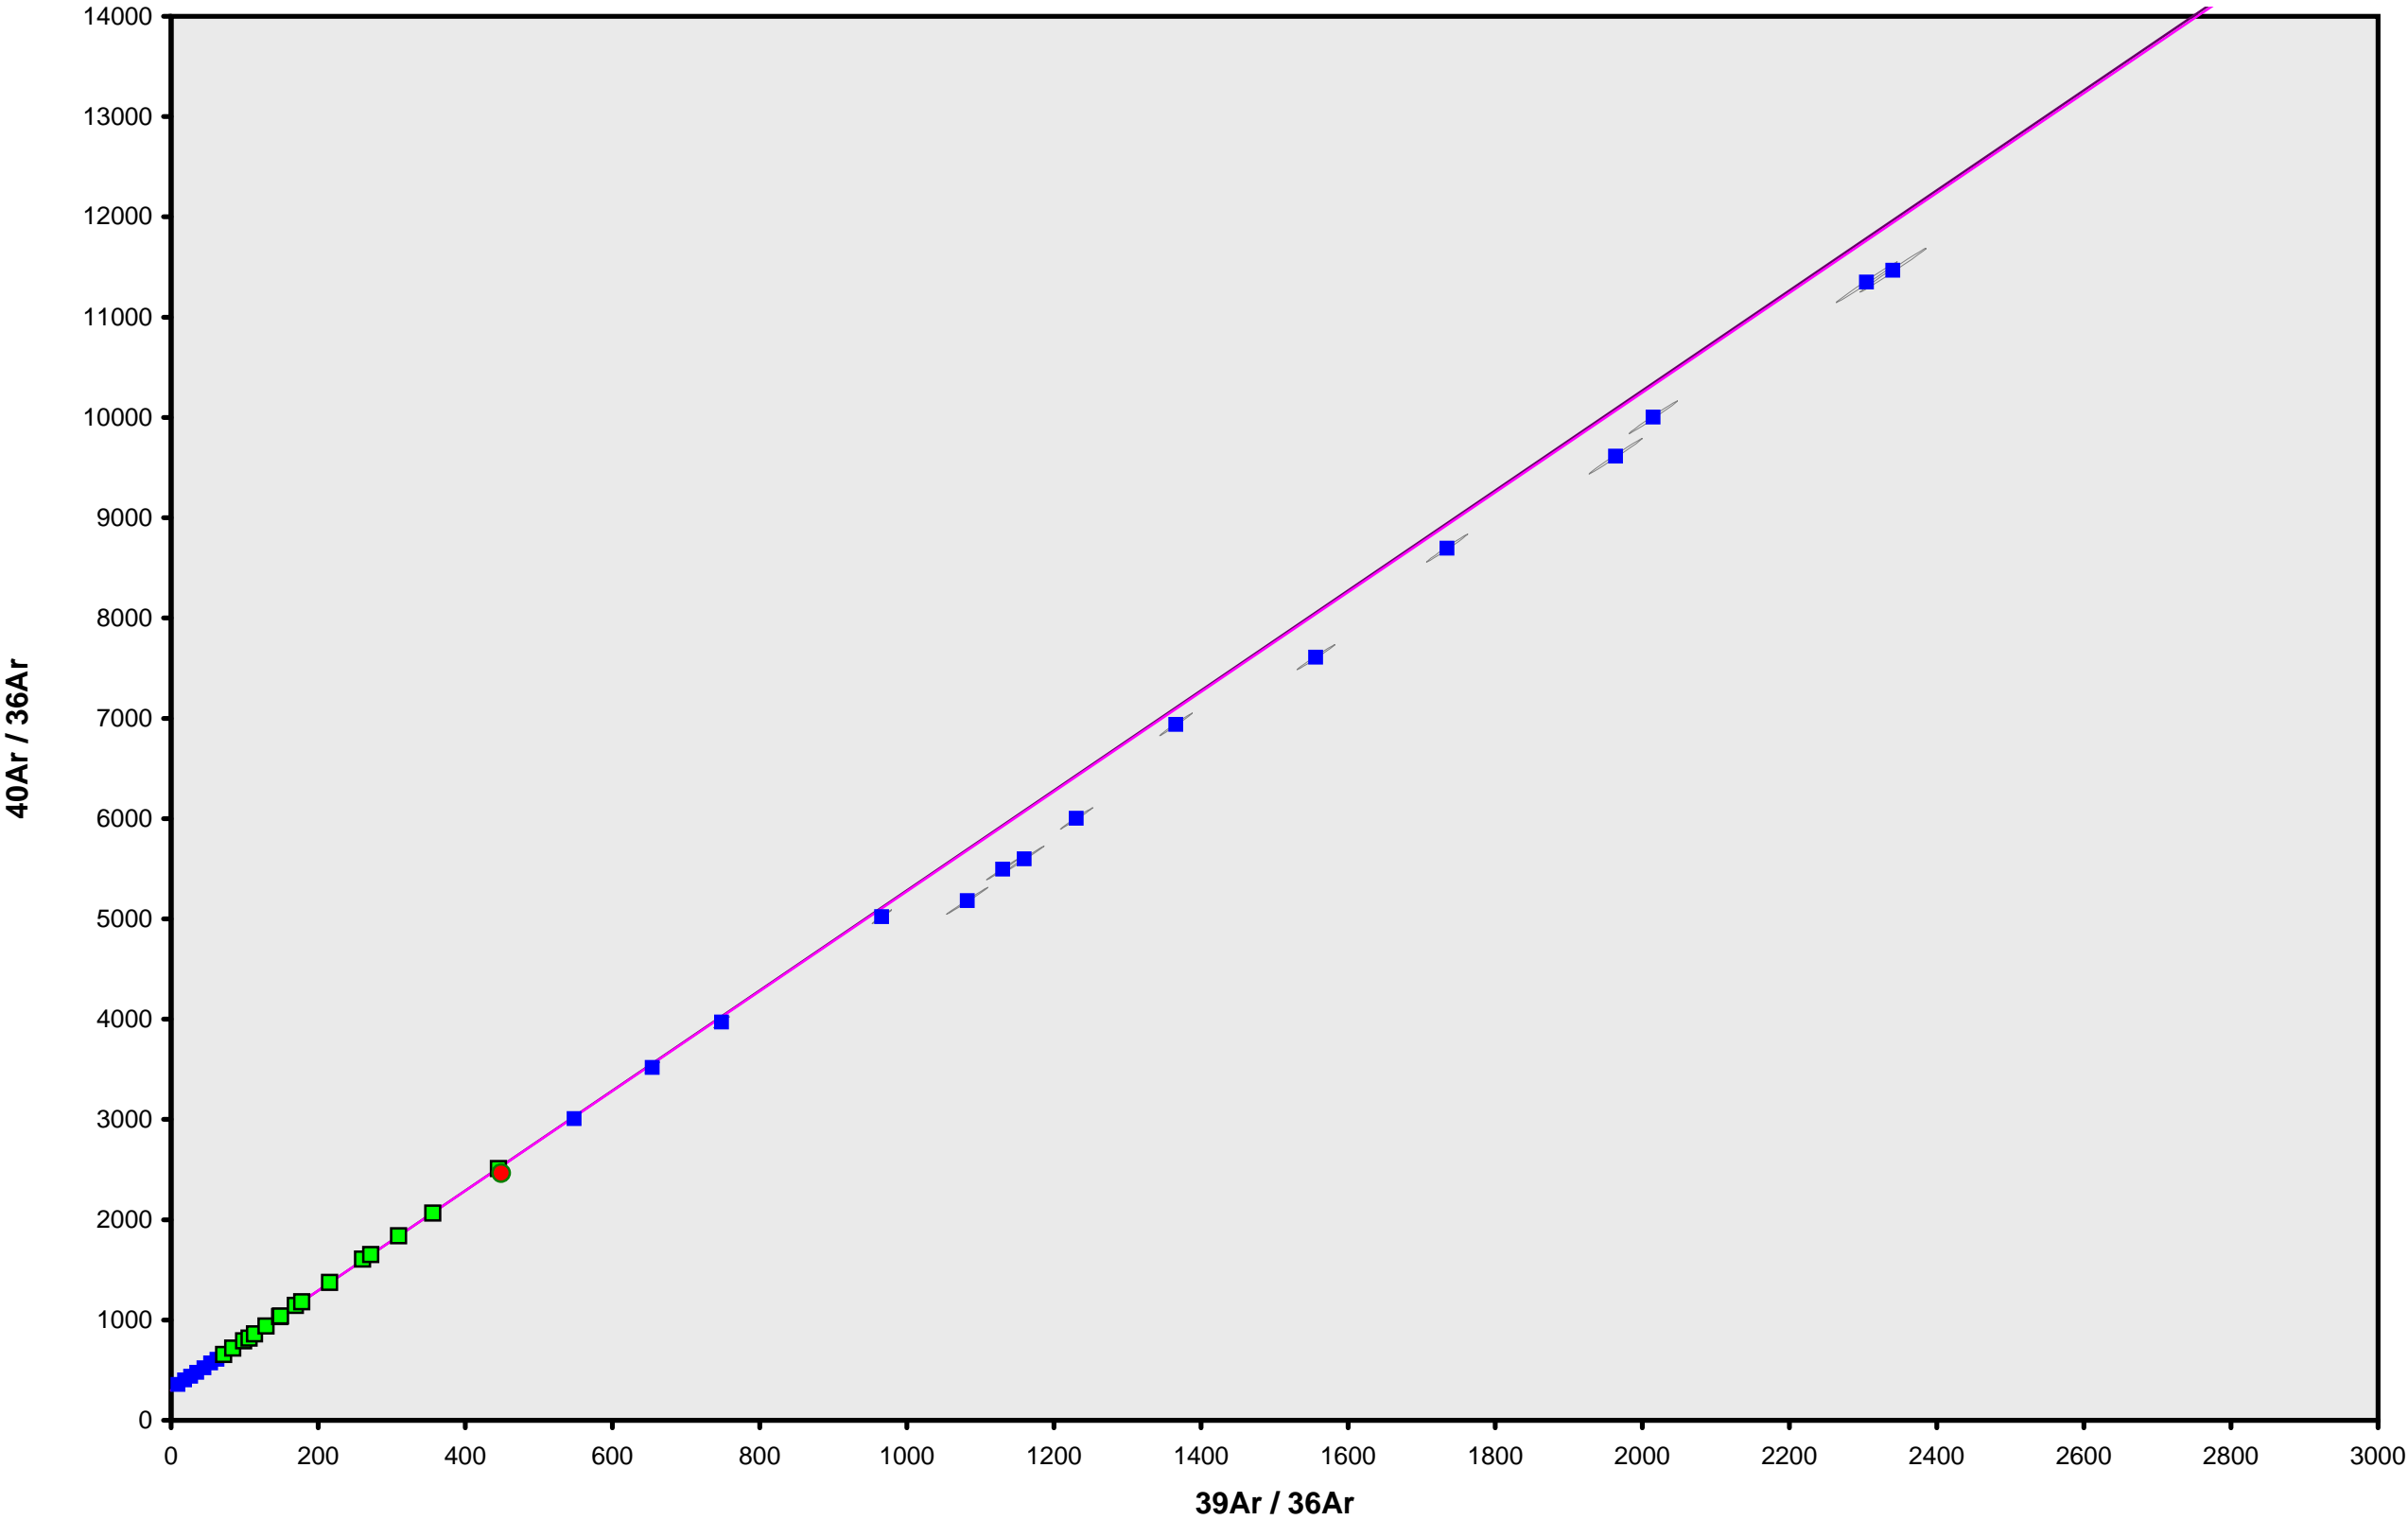

Ar-Ages in Ma

WEIGHTED PLATEAU

$16.01 \pm 0.08$

TOTAL FUSION

$15.51 \pm 0.08$

NORMAL ISOCHRON

$15.97 \pm 0.10$

INVERSE ISOCHRON

$15.97 \pm 0.10$

MSWD (PROBABILITY)

3.19 (0%)

40AR/36AR INTERCEPT

$298.5 \pm 4.6$

Sample Info

Groundmass

Kerguelen Plateau

Dan Miggins

IRR = 14-OSU-06 (6C10-14)

J =  $0.00178335 \pm 0.00000432$



15D01957.AGE >>> 154-4 >>> KERGUELEN | FALLOON (14-PIL-01) PROJECT

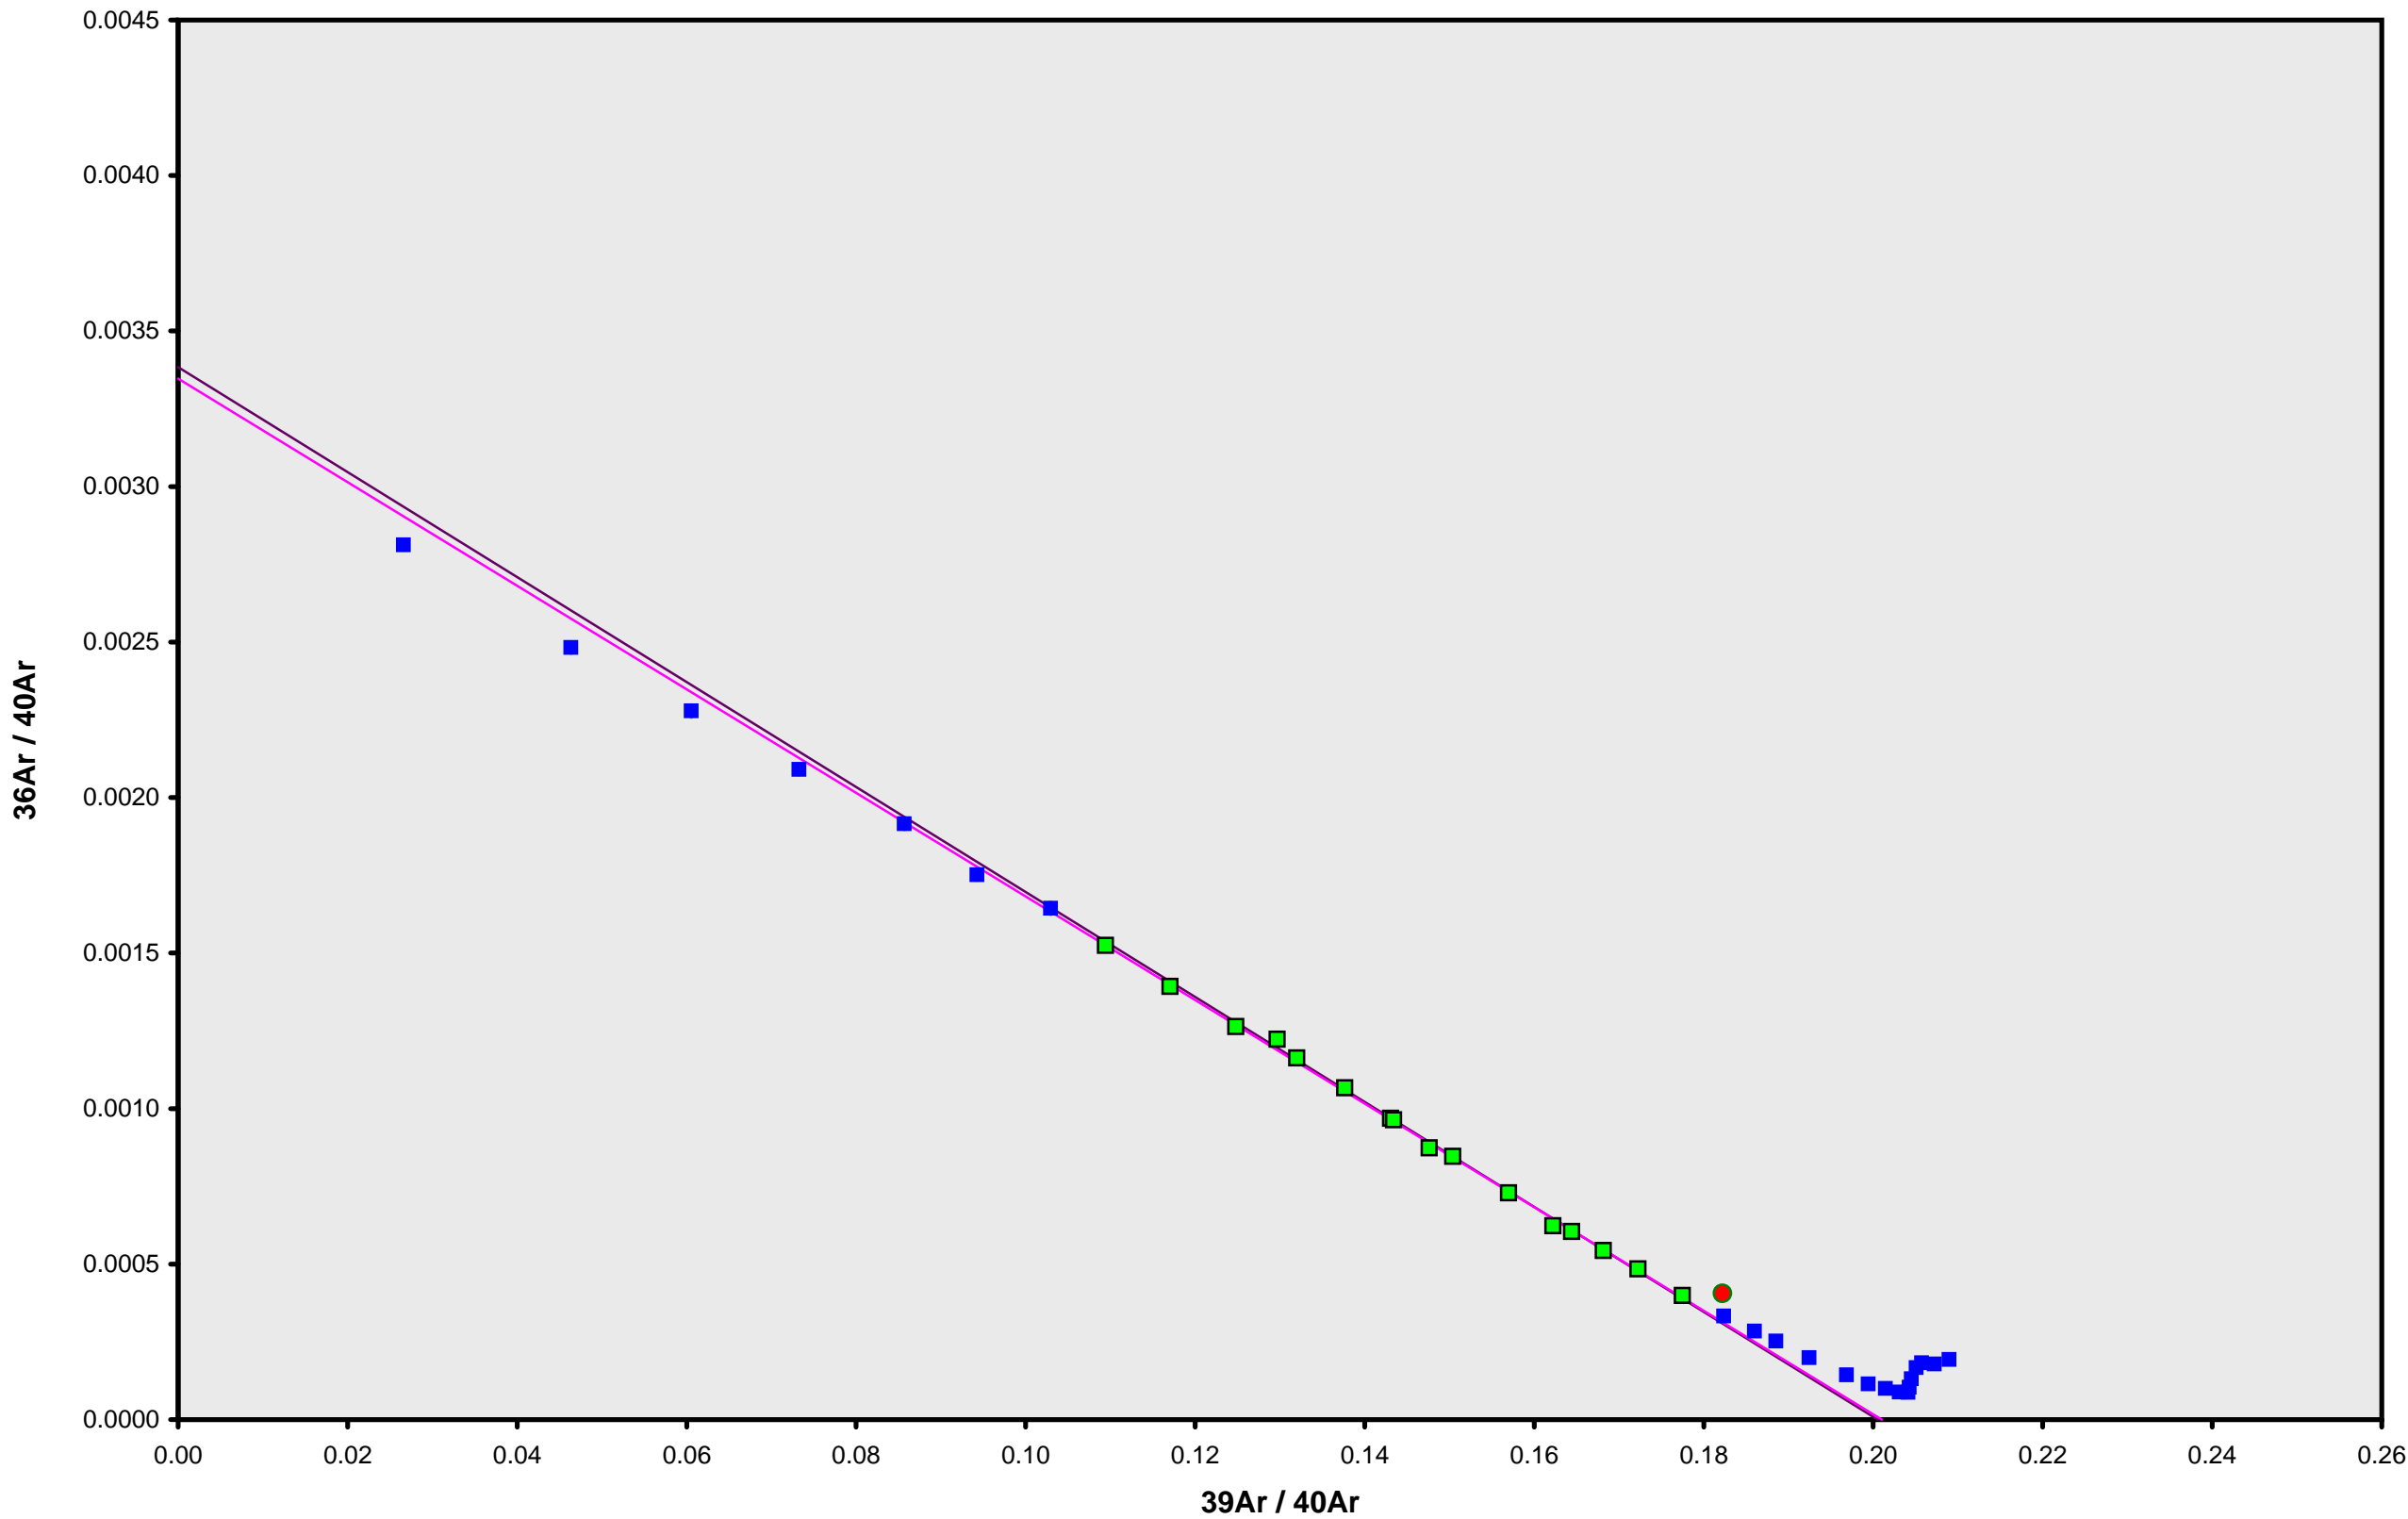

### Ar-Ages in Ma

#### WEIGHTED PLATEAU

16.01  $\pm$  0.08

#### TOTAL FUSION

15.51  $\pm$  0.08

#### NORMAL ISOCHRON

15.97  $\pm$  0.10

#### INVERSE ISOCHRON

15.97  $\pm$  0.10

#### MSWD (PROBABILITY)

3.22 (0%)

#### SPREADING FACTOR

33.9%

#### 40AR/36AR INTERCEPT

298.7  $\pm$  4.7

### Sample Info

Groundmass

Kerguelen Plateau

Dan Miggins

IRR = 14-OSU-06 (6C10-14)

J = 0.00178335  $\pm$  0.00000432



| Incremental Heating |        | 36Ar(a)<br>[fA] | 37Ar(ca)<br>[fA] | 38Ar(cl)<br>[fA] | 39Ar(k)<br>[fA] | 40Ar(r)<br>[fA] | Age ± 2σ<br>(ka) | 40Ar(r)<br>(%) | 39Ar(k)<br>(%) | K/Ca ± 2σ     |
|---------------------|--------|-----------------|------------------|------------------|-----------------|-----------------|------------------|----------------|----------------|---------------|
| 15D01905            | 1.9 %  | 1.0447192       | 35.0246          | 2.588763         | 76.4681         | 12.38774        | 518.7 ± 98.0     | 3.86           | 2.40           | 0.939 ± 0.014 |
| 15D01906            | 2.0 %  | 0.5654271       | 31.3959          | 1.773700         | 67.6173         | 12.08157        | 572.1 ± 71.3     | 6.74           | 2.13           | 0.926 ± 0.015 |
| 15D01908            | 2.1 %  | 0.3129370       | 22.8078          | 1.094287         | 48.8371         | 8.84565         | 580.0 ± 71.6     | 8.73           | 1.54           | 0.921 ± 0.019 |
| 15D01909            | 2.2 %  | ✓ 0.2966408     | 26.6468          | 1.010371         | 54.6199         | 9.12684         | 535.0 ± 61.5     | 9.42           | 1.72           | 0.881 ± 0.017 |
| 15D01910            | 2.3 %  | ✓ 0.1793496     | 18.2585          | 0.580026         | 38.0245         | 5.83222         | 491.1 ± 67.8     | 9.91           | 1.20           | 0.896 ± 0.024 |
| 15D01912            | 2.4 %  | ✓ 0.1790996     | 21.0962          | 0.534327         | 43.6875         | 6.94660         | 509.1 ± 66.5     | 11.59          | 1.37           | 0.890 ± 0.021 |
| 15D01913            | 2.5 %  | ✓ 0.1625273     | 21.5961          | 0.521498         | 43.5529         | 7.35778         | 540.9 ± 56.9     | 13.27          | 1.37           | 0.867 ± 0.020 |
| 15D01914            | 2.6 %  | ✓ 0.1701516     | 22.4346          | 0.491746         | 45.1690         | 7.69649         | 545.6 ± 61.6     | 13.26          | 1.42           | 0.866 ± 0.018 |
| 15D01916            | 2.7 %  | ✓ 0.1634510     | 25.6915          | 0.474709         | 51.7403         | 8.42503         | 521.4 ± 48.4     | 14.84          | 1.63           | 0.866 ± 0.017 |
| 15D01918            | 2.8 %  | ✓ 0.1375839     | 24.3099          | 0.367982         | 48.4108         | 7.62242         | 504.2 ± 51.9     | 15.77          | 1.52           | 0.856 ± 0.017 |
| 15D01919            | 2.9 %  | ✓ 0.0985139     | 19.6577          | 0.317333         | 39.3925         | 5.98670         | 486.6 ± 55.3     | 17.04          | 1.24           | 0.862 ± 0.021 |
| 15D01921            | 3.0 %  | ✓ 0.0942377     | 20.8684          | 0.275672         | 41.4056         | 6.16898         | 477.1 ± 50.4     | 18.11          | 1.30           | 0.853 ± 0.020 |
| 15D01922            | 3.2 %  | ✓ 0.1070198     | 24.5979          | 0.273985         | 48.5001         | 6.91171         | 456.3 ± 47.8     | 17.91          | 1.52           | 0.848 ± 0.017 |
| 15D01923            | 3.4 %  | ✓ 0.0988777     | 22.1528          | 0.230388         | 44.5820         | 6.46295         | 464.2 ± 48.7     | 18.09          | 1.40           | 0.865 ± 0.019 |
| 15D01925            | 3.6 %  | ✓ 0.1327866     | 36.9319          | 0.321492         | 73.0445         | 11.40988        | 500.2 ± 33.7     | 22.49          | 2.30           | 0.850 ± 0.012 |
| 15D01926            | 3.8 %  | ✓ 0.1022421     | 27.8770          | 0.247485         | 54.4798         | 8.72617         | 512.9 ± 40.0     | 22.38          | 1.71           | 0.840 ± 0.015 |
| 15D01927            | 4.0 %  | ✓ 0.1069430     | 31.4344          | 0.234495         | 62.9164         | 9.36139         | 476.4 ± 35.8     | 22.82          | 1.98           | 0.861 ± 0.014 |
| 15D01929            | 4.3 %  | ✓ 0.1479171     | 52.2867          | 0.403188         | 101.9903        | 16.05763        | 504.1 ± 24.8     | 26.82          | 3.21           | 0.839 ± 0.009 |
| 15D01930            | 4.6 %  | ✓ 0.1007716     | 40.7721          | 0.309739         | 77.7623         | 12.26475        | 505.0 ± 29.1     | 29.12          | 2.44           | 0.820 ± 0.011 |
| 15D01931            | 4.9 %  | ✓ 0.1241173     | 56.3715          | 0.360815         | 108.9602        | 16.64427        | 489.1 ± 23.0     | 31.15          | 3.42           | 0.831 ± 0.009 |
| 15D01933            | 5.2 %  | ✓ 0.1288195     | 63.0661          | 0.401168         | 120.4346        | 17.94388        | 477.1 ± 21.5     | 31.97          | 3.79           | 0.821 ± 0.008 |
| 15D01934            | 5.5 %  | ✓ 0.1004836     | 52.1588          | 0.337083         | 97.8645         | 14.41678        | 471.7 ± 22.8     | 32.61          | 3.08           | 0.807 ± 0.009 |
| 15D01935            | 5.8 %  | ✓ 0.1043605     | 56.9645          | 0.311037         | 105.2578        | 15.77902        | 480.0 ± 21.3     | 33.77          | 3.31           | 0.795 ± 0.008 |
| 15D01937            | 6.1 %  | ✓ 0.1001462     | 57.5269          | 0.355074         | 104.0495        | 15.12802        | 465.6 ± 21.8     | 33.75          | 3.27           | 0.778 ± 0.008 |
| 15D01938            | 6.5 %  | ✓ 0.1022173     | 62.2782          | 0.408621         | 110.4878        | 16.33762        | 473.5 ± 21.1     | 35.02          | 3.47           | 0.763 ± 0.008 |
| 15D01939            | 7.0 %  | ✓ 0.1032560     | 67.4343          | 0.328529         | 116.9918        | 17.21963        | 471.3 ± 19.4     | 35.99          | 3.68           | 0.746 ± 0.007 |
| 15D01941            | 7.6 %  | ✓ 0.1045439     | 74.7319          | 0.453753         | 126.2973        | 18.33685        | 464.9 ± 17.7     | 37.15          | 3.97           | 0.727 ± 0.007 |
| 15D01942            | 8.4 %  | 0.1231466       | 93.6498          | 0.513248         | 151.0158        | 20.84743        | 442.0 ± 16.3     | 36.33          | 4.75           | 0.693 ± 0.006 |
| 15D01943            | 9.4 %  | 0.1294786       | 104.5177         | 0.720314         | 157.9789        | 22.05110        | 447.0 ± 16.6     | 36.47          | 4.97           | 0.650 ± 0.005 |
| 15D01945            | 10.5 % | 0.1305802       | 104.3152         | 0.691989         | 142.1062        | 19.16685        | 431.9 ± 17.8     | 33.11          | 4.47           | 0.586 ± 0.005 |
| 15D01946            | 11.7 % | 0.1582505       | 133.9759         | 0.865156         | 149.3512        | 19.44038        | 416.8 ± 18.4     | 29.30          | 4.69           | 0.479 ± 0.004 |
| 15D01947            | 13.1 % | 0.1857335       | 154.9119         | 0.947440         | 145.6326        | 19.44282        | 427.5 ± 19.4     | 26.11          | 4.58           | 0.404 ± 0.003 |
| 15D01949            | 14.7 % | 0.1838474       | 128.8899         | 0.786122         | 119.5648        | 15.01326        | 402.1 ± 24.3     | 21.61          | 3.76           | 0.399 ± 0.003 |
| 15D01950            | 16.5 % | 0.1940844       | 156.9776         | 0.958218         | 113.0415        | 14.14594        | 400.7 ± 28.0     | 19.75          | 3.55           | 0.310 ± 0.002 |
| 15D01951            | 18.3 % | 0.1533133       | 131.7699         | 0.617259         | 74.2874         | 8.95199         | 385.9 ± 35.2     | 16.48          | 2.34           | 0.242 ± 0.002 |
| 15D01953            | 20.2 % | 0.1234406       | 112.7973         | 0.482515         | 54.7097         | 6.62067         | 387.5 ± 44.6     | 15.34          | 1.72           | 0.209 ± 0.002 |
| 15D01954            | 22.2 % | 0.1535234       | 143.6827         | 0.505035         | 53.1897         | 6.38867         | 384.6 ± 53.2     | 12.33          | 1.67           | 0.159 ± 0.001 |
| 15D01956            | 24.5 % | 0.2078496       | 220.6499         | 0.655029         | 68.0159         | 8.89048         | 418.5 ± 46.1     | 12.63          | 2.14           | 0.133 ± 0.001 |

Σ 6.8123890 2502.5108 22.749591 3181.4380 462.43816

| Information on Analysis                                                                                                                                                                                                                                                       | Results          | 40(r)/39(k) ± 2σ          | Age ± 2σ<br>(ka)                                                            | MSWD                         | 39Ar(k)<br>(%,n)                                          | K/Ca ± 2σ     |
|-------------------------------------------------------------------------------------------------------------------------------------------------------------------------------------------------------------------------------------------------------------------------------|------------------|---------------------------|-----------------------------------------------------------------------------|------------------------------|-----------------------------------------------------------|---------------|
| Sample = 1180180-2<br>Material = Groundmass<br>Location = Kerguelen Plateau<br>Analyst = Dan Miggins<br>Project = KERGUELEN   FALLOON (14-<br>Mass Discrimination Law = LIN<br>Irradiation = 14-OSU-06 (6C11-14)<br>J = 0.00177095 ± 0.00000427<br>FCT-NM = 28.201 ± 0.023 Ma | Age Plateau      | 0.15052 ± 0.00238 ± 1.58% | 482.0 ± 8.0 ± 1.65%<br>Full External Error ± 13.5<br>Analytical Error ± 7.6 | 1.57<br>4%<br>1.59<br>1.2523 | 55.31<br>24<br>2σ Confidence Limit<br>Error Magnification | 0.803 ± 0.020 |
|                                                                                                                                                                                                                                                                               | Total Fusion Age | 0.14536 ± 0.00175 ± 1.21% | 465.4 ± 6.0 ± 1.30%<br>Full External Error ± 12.1<br>Analytical Error ± 5.6 |                              | 38                                                        | 0.547 ± 0.001 |



| Normal Isochron |        | 39(k)/36(a) ± 2σ |                 | 40(a+r)/36(a) ± 2σ | r.i.   |
|-----------------|--------|------------------|-----------------|--------------------|--------|
| 15D01905        | 1.9 %  |                  | 73.19 ± 0.57    | 307.36 ± 2.33      | 0.9684 |
| 15D01906        | 2.0 %  |                  | 119.59 ± 1.09   | 316.87 ± 2.85      | 0.9680 |
| 15D01908        | 2.1 %  |                  | 156.06 ± 1.83   | 323.77 ± 3.81      | 0.9636 |
| 15D01909        | 2.2 %  | ✓                | 184.13 ± 2.18   | 326.27 ± 3.89      | 0.9641 |
| 15D01910        | 2.3 %  | ✓                | 212.01 ± 3.12   | 328.02 ± 4.94      | 0.9522 |
| 15D01912        | 2.4 %  | ✓                | 243.93 ± 4.07   | 334.29 ± 5.69      | 0.9641 |
| 15D01913        | 2.5 %  | ✓                | 267.97 ± 4.15   | 340.77 ± 5.42      | 0.9540 |
| 15D01914        | 2.6 %  | ✓                | 265.46 ± 4.45   | 340.73 ± 5.83      | 0.9630 |
| 15D01916        | 2.7 %  | ✓                | 316.55 ± 4.92   | 347.04 ± 5.55      | 0.9568 |
| 15D01918        | 2.8 %  | ✓                | 351.86 ± 6.53   | 350.90 ± 6.68      | 0.9603 |
| 15D01919        | 2.9 %  | ✓                | 399.87 ± 8.83   | 356.27 ± 8.17      | 0.9515 |
| 15D01921        | 3.0 %  | ✓                | 439.37 ± 9.64   | 360.96 ± 8.26      | 0.9486 |
| 15D01922        | 3.2 %  | ✓                | 453.19 ± 9.86   | 360.08 ± 8.10      | 0.9583 |
| 15D01923        | 3.4 %  | ✓                | 450.88 ± 9.86   | 360.86 ± 8.20      | 0.9523 |
| 15D01925        | 3.6 %  | ✓                | 550.09 ± 10.30  | 381.43 ± 7.32      | 0.9658 |
| 15D01926        | 3.8 %  | ✓                | 532.85 ± 11.31  | 380.85 ± 8.37      | 0.9572 |
| 15D01927        | 4.0 %  | ✓                | 588.32 ± 12.41  | 383.04 ± 8.34      | 0.9611 |
| 15D01929        | 4.3 %  | ✓                | 689.51 ± 11.93  | 404.06 ± 7.14      | 0.9707 |
| 15D01930        | 4.6 %  | ✓                | 771.67 ± 17.31  | 417.21 ± 9.62      | 0.9672 |
| 15D01931        | 4.9 %  | ✓                | 877.88 ± 17.90  | 429.60 ± 8.94      | 0.9740 |
| 15D01933        | 5.2 %  | ✓                | 934.91 ± 19.09  | 434.79 ± 9.04      | 0.9766 |
| 15D01934        | 5.5 %  | ✓                | 973.93 ± 21.56  | 438.97 ± 9.97      | 0.9691 |
| 15D01935        | 5.8 %  | ✓                | 1008.60 ± 21.66 | 446.70 ± 9.83      | 0.9709 |
| 15D01937        | 6.1 %  | ✓                | 1038.98 ± 23.48 | 446.56 ± 10.34     | 0.9711 |
| 15D01938        | 6.5 %  | ✓                | 1080.91 ± 24.74 | 455.33 ± 10.64     | 0.9743 |
| 15D01939        | 7.0 %  | ✓                | 1133.03 ± 24.88 | 462.27 ± 10.38     | 0.9731 |
| 15D01941        | 7.6 %  | ✓                | 1208.08 ± 25.80 | 470.90 ± 10.27     | 0.9734 |
| 15D01942        | 8.4 %  |                  | 1226.31 ± 24.70 | 464.79 ± 9.53      | 0.9770 |
| 15D01943        | 9.4 %  |                  | 1220.12 ± 25.07 | 465.81 ± 9.72      | 0.9797 |
| 15D01945        | 10.5 % |                  | 1088.27 ± 21.28 | 442.28 ± 8.81      | 0.9759 |
| 15D01946        | 11.7 % |                  | 943.76 ± 16.75  | 418.35 ± 7.55      | 0.9766 |
| 15D01947        | 13.1 % |                  | 784.09 ± 12.19  | 400.18 ± 6.32      | 0.9749 |
| 15D01949        | 14.7 % |                  | 650.35 ± 10.51  | 377.16 ± 6.20      | 0.9734 |
| 15D01950        | 16.5 % |                  | 582.43 ± 9.81   | 368.39 ± 6.29      | 0.9768 |
| 15D01951        | 18.3 % |                  | 484.55 ± 8.41   | 353.89 ± 6.30      | 0.9649 |
| 15D01953        | 20.2 % |                  | 443.21 ± 8.85   | 349.13 ± 7.19      | 0.9591 |
| 15D01954        | 22.2 % |                  | 346.46 ± 6.54   | 337.11 ± 6.51      | 0.9662 |
| 15D01956        | 24.5 % |                  | 327.24 ± 5.10   | 338.27 ± 5.35      | 0.9706 |

| Results         | 40(a)/36(a) ± 2σ                                                    | 40(r)/39(k) ± 2σ          | Age ± 2σ (ka)                                                                 | MSWD                                   |
|-----------------|---------------------------------------------------------------------|---------------------------|-------------------------------------------------------------------------------|----------------------------------------|
| Normal Isochron | 300.18 ± 2.30 ± 0.77%                                               | 0.14399 ± 0.00370 ± 2.57% | 461.1 ± 12.0 ± 2.61%<br>Full External Error ± 15.9<br>Analytical Error ± 11.8 | 0.85<br>66%                            |
| Statistics      | 2σ Confidence Limit<br>Error Magnification<br>Number of Data Points | 1.60<br>1.0000<br>24      | Convergence<br>Number of Iterations<br>Calculated Line                        | 0.000000965793<br>5<br>Weighted York-2 |



| Inverse Isochron |        | 39(k)/40(a+r) ± 2σ |                       | 36(a)/40(a+r) ± 2σ      | r.i.   |
|------------------|--------|--------------------|-----------------------|-------------------------|--------|
| 15D01905         | 1.9 %  |                    | 0.2381426 ± 0.0004607 | 0.00325354 ± 0.00002465 | 0.0398 |
| 15D01906         | 2.0 %  |                    | 0.3774021 ± 0.0008646 | 0.00315590 ± 0.00002840 | 0.0866 |
| 15D01908         | 2.1 %  |                    | 0.4820157 ± 0.0015254 | 0.00308864 ± 0.00003631 | 0.1481 |
| 15D01909         | 2.2 %  | ✓                  | 0.5643478 ± 0.0017978 | 0.00306497 ± 0.00003654 | 0.1584 |
| 15D01910         | 2.3 %  | ✓                  | 0.6463458 ± 0.0029869 | 0.00304861 ± 0.00004596 | 0.2296 |
| 15D01912         | 2.4 %  | ✓                  | 0.7296997 ± 0.0033051 | 0.00299145 ± 0.00005088 | 0.1996 |
| 15D01913         | 2.5 %  | ✓                  | 0.7863722 ± 0.0037614 | 0.00293452 ± 0.00004670 | 0.2369 |
| 15D01914         | 2.6 %  | ✓                  | 0.7790935 ± 0.0036039 | 0.00293485 ± 0.00005026 | 0.2090 |
| 15D01916         | 2.7 %  | ✓                  | 0.9121292 ± 0.0042454 | 0.00288147 ± 0.00004605 | 0.2357 |
| 15D01918         | 2.8 %  | ✓                  | 1.0027399 ± 0.0053367 | 0.00284980 ± 0.00005428 | 0.2327 |
| 15D01919         | 2.9 %  | ✓                  | 1.1223708 ± 0.0079272 | 0.00280686 ± 0.00006438 | 0.2731 |
| 15D01921         | 3.0 %  | ✓                  | 1.2172305 ± 0.0088152 | 0.00277038 ± 0.00006338 | 0.2857 |
| 15D01922         | 3.2 %  | ✓                  | 1.2585649 ± 0.0080945 | 0.00277713 ± 0.00006244 | 0.2543 |
| 15D01923         | 3.4 %  | ✓                  | 1.2494499 ± 0.0086731 | 0.00277113 ± 0.00006300 | 0.2752 |
| 15D01925         | 3.6 %  | ✓                  | 1.4421895 ± 0.0071852 | 0.00262174 ± 0.00005034 | 0.2250 |
| 15D01926         | 3.8 %  | ✓                  | 1.3991165 ± 0.0089061 | 0.00262572 ± 0.00005773 | 0.2614 |
| 15D01927         | 4.0 %  | ✓                  | 1.5359300 ± 0.0092390 | 0.00261072 ± 0.00005684 | 0.2497 |
| 15D01929         | 4.3 %  | ✓                  | 1.7064606 ± 0.0072476 | 0.00247489 ± 0.00004372 | 0.2041 |
| 15D01930         | 4.6 %  | ✓                  | 1.8496011 ± 0.0108353 | 0.00239688 ± 0.00005526 | 0.2317 |
| 15D01931         | 4.9 %  | ✓                  | 2.0434795 ± 0.0096370 | 0.00232774 ± 0.00004842 | 0.2000 |
| 15D01933         | 5.2 %  | ✓                  | 2.1502317 ± 0.0096180 | 0.00229994 ± 0.00004781 | 0.1889 |
| 15D01934         | 5.5 %  | ✓                  | 2.2186610 ± 0.0124391 | 0.00227804 ± 0.00005175 | 0.2250 |
| 15D01935         | 5.8 %  | ✓                  | 2.2579000 ± 0.0119061 | 0.00223865 ± 0.00004924 | 0.2172 |
| 15D01937         | 6.1 %  | ✓                  | 2.3266253 ± 0.0128652 | 0.00223934 ± 0.00005186 | 0.2187 |
| 15D01938         | 6.5 %  | ✓                  | 2.3738942 ± 0.0125039 | 0.00219620 ± 0.00005134 | 0.2051 |
| 15D01939         | 7.0 %  | ✓                  | 2.4510239 ± 0.0126897 | 0.00216326 ± 0.00004857 | 0.2091 |
| 15D01941         | 7.6 %  | ✓                  | 2.5654751 ± 0.0128149 | 0.00212360 ± 0.00004633 | 0.2063 |
| 15D01942         | 8.4 %  |                    | 2.6384183 ± 0.0115468 | 0.00215151 ± 0.00004411 | 0.1879 |
| 15D01943         | 9.4 %  |                    | 2.6193584 ± 0.0109520 | 0.00214681 ± 0.00004478 | 0.1740 |
| 15D01945         | 10.5 % |                    | 2.4605734 ± 0.0107022 | 0.00226100 ± 0.00004502 | 0.1910 |
| 15D01946         | 11.7 % |                    | 2.2559444 ± 0.0087634 | 0.00239037 ± 0.00004312 | 0.1822 |
| 15D01947         | 13.1 % |                    | 1.9593483 ± 0.0069040 | 0.00249887 ± 0.00003948 | 0.1807 |
| 15D01949         | 14.7 % |                    | 1.7243220 ± 0.0065041 | 0.00265138 ± 0.00004360 | 0.1889 |
| 15D01950         | 16.5 % |                    | 1.5810465 ± 0.0057843 | 0.00271455 ± 0.00004637 | 0.1736 |
| 15D01951         | 18.3 % |                    | 1.3692004 ± 0.0064136 | 0.00282574 ± 0.00005033 | 0.2256 |
| 15D01953         | 20.2 % |                    | 1.2694452 ± 0.0074050 | 0.00286423 ± 0.00005897 | 0.2477 |
| 15D01954         | 22.2 % |                    | 1.0277236 ± 0.0051159 | 0.00296636 ± 0.00005726 | 0.2162 |
| 15D01956         | 24.5 % |                    | 0.9673706 ± 0.0036887 | 0.00295619 ± 0.00004677 | 0.1848 |

| Results          | 40(a)/36(a) ± 2σ      | 40(r)/39(k) ± 2σ          | Age ± 2σ (ka)              | MSWD            |
|------------------|-----------------------|---------------------------|----------------------------|-----------------|
| Inverse Isochron | 300.23 ± 2.31 ± 0.77% | 0.14404 ± 0.00370 ± 2.57% | 461.2 ± 12.0 ± 2.61%       | 0.86 66%        |
|                  |                       |                           | Full External Error ± 15.9 |                 |
|                  |                       |                           | Analytical Error ± 11.8    |                 |
| Statistics       | 2σ Confidence Limit   | 1.60                      | Convergence                | 0.0037051201    |
|                  | Error Magnification   | 1.0000                    | Number of Iterations       | 3               |
|                  | Number of Data Points | 24                        | Calculated Line            | Weighted York-2 |
|                  | Spreading Factor      | 28.8%                     |                            |                 |







| OSU Argon Geochronology Lab |        |                 |      |                 |      |                  |      |                  |       |                  |      |                 |      |                 |      |                 |      |                  |      |                  |       |                 |      |                  |      |                 |      |                 |      |                 |      |                 |      |
|-----------------------------|--------|-----------------|------|-----------------|------|------------------|------|------------------|-------|------------------|------|-----------------|------|-----------------|------|-----------------|------|------------------|------|------------------|-------|-----------------|------|------------------|------|-----------------|------|-----------------|------|-----------------|------|-----------------|------|
| Degassing Patterns          |        | 36Ar(a)<br>[fA] | %1σ  | 36Ar(c)<br>[fA] | %1σ  | 36Ar(ca)<br>[fA] | %1σ  | 36Ar(cl)<br>[fA] | %1σ   | 37Ar(ca)<br>[fA] | %1σ  | 38Ar(a)<br>[fA] | %1σ  | 38Ar(c)<br>[fA] | %1σ  | 38Ar(k)<br>[fA] | %1σ  | 38Ar(ca)<br>[fA] | %1σ  | 38Ar(cl)<br>[fA] | %1σ   | 39Ar(k)<br>[fA] | %1σ  | 39Ar(ca)<br>[fA] | %1σ  | 40Ar(r)<br>[fA] | %1σ  | 40Ar(a)<br>[fA] | %1σ  | 40Ar(c)<br>[fA] | %1σ  | 40Ar(k)<br>[fA] | %1σ  |
| 15D01905                    | 1.9 %  | 1.0447192       | 0.38 | 0.0000000       | 0.00 | 0.0092465        | 0.76 | 0.0003549        | 1.76  | 35.0246          | 0.76 | 0.1952580       | 0.38 | 0.0000000       | 0.00 | 0.870207        | 0.09 | 0.0004868        | 0.76 | 2.588763         | 1.99  | 76.4681         | 0.09 | 0.0235716        | 0.76 | 12.38774        | 9.45 | 308.7145        | 0.38 | 0.0000000       | 0.00 | 0.0772328       | 0.09 |
| 15D01906                    | 2.0 %  | 0.5654271       | 0.44 | 0.0000000       | 0.00 | 0.0082885        | 0.81 | 0.0002432        | 2.35  | 31.3959          | 0.81 | 0.1056783       | 0.44 | 0.0000000       | 0.00 | 0.769485        | 0.09 | 0.0004364        | 0.81 | 1.773700         | 2.53  | 67.6173         | 0.09 | 0.0211294        | 0.81 | 12.08157        | 6.23 | 167.0837        | 0.44 | 0.0000000       | 0.00 | 0.0682935       | 0.09 |
| 15D01908                    | 2.1 %  | 0.3129370       | 0.58 | 0.0000000       | 0.00 | 0.0060213        | 1.05 | 0.0001501        | 3.44  | 22.8078          | 1.05 | 0.0584879       | 0.58 | 0.0000000       | 0.00 | 0.555766        | 0.11 | 0.0003170        | 1.05 | 1.094287         | 3.56  | 48.8371         | 0.11 | 0.0153496        | 1.05 | 8.84565         | 6.17 | 92.4729         | 0.58 | 0.0000000       | 0.00 | 0.0493255       | 0.11 |
| 15D01909                    | 2.2 %  | ✓ 0.2966408     | 0.58 | 0.0000000       | 0.00 | 0.0070348        | 0.95 | 0.0001386        | 3.76  | 26.6468          | 0.95 | 0.0554422       | 0.58 | 0.0000000       | 0.00 | 0.621575        | 0.10 | 0.0003704        | 0.95 | 1.010371         | 3.87  | 54.6199         | 0.10 | 0.0179333        | 0.95 | 9.12684         | 5.75 | 87.6573         | 0.58 | 0.0000000       | 0.00 | 0.0551661       | 0.10 |
| 15D01910                    | 2.3 %  | ✓ 0.1793496     | 0.73 | 0.0000000       | 0.00 | 0.0048202        | 1.33 | 0.0000796        | 6.90  | 18.2585          | 1.33 | 0.0335204       | 0.73 | 0.0000000       | 0.00 | 0.432719        | 0.12 | 0.0002538        | 1.33 | 0.580026         | 6.96  | 38.0245         | 0.12 | 0.0122879        | 1.33 | 5.83222         | 6.91 | 52.9978         | 0.73 | 0.0000000       | 0.00 | 0.0384048       | 0.12 |
| 15D01912                    | 2.4 %  | ✓ 0.1790996     | 0.83 | 0.0000000       | 0.00 | 0.0055694        | 1.16 | 0.0000733        | 7.33  | 21.0962          | 1.16 | 0.0334737       | 0.83 | 0.0000000       | 0.00 | 0.497164        | 0.11 | 0.0002932        | 1.16 | 0.534327         | 7.39  | 43.6875         | 0.11 | 0.0141977        | 1.16 | 6.94660         | 6.53 | 52.9239         | 0.83 | 0.0000000       | 0.00 | 0.0441244       | 0.11 |
| 15D01913                    | 2.5 %  | ✓ 0.1625273     | 0.77 | 0.0000000       | 0.00 | 0.0057014        | 1.14 | 0.0000716        | 7.46  | 21.5961          | 1.14 | 0.0303763       | 0.77 | 0.0000000       | 0.00 | 0.495632        | 0.11 | 0.0003002        | 1.14 | 0.521498         | 7.51  | 43.5529         | 0.11 | 0.0145342        | 1.14 | 7.35778         | 5.25 | 48.0268         | 0.77 | 0.0000000       | 0.00 | 0.0439884       | 0.11 |
| 15D01914                    | 2.6 %  | ✓ 0.1701516     | 0.83 | 0.0000000       | 0.00 | 0.0059227        | 1.06 | 0.0000675        | 8.14  | 22.4346          | 1.06 | 0.0318013       | 0.83 | 0.0000000       | 0.00 | 0.514023        | 0.11 | 0.0003118        | 1.06 | 0.491746         | 8.19  | 45.1690         | 0.11 | 0.0150985        | 1.06 | 7.69649         | 5.65 | 50.2798         | 0.83 | 0.0000000       | 0.00 | 0.0456206       | 0.11 |
| 15D01916                    | 2.7 %  | ✓ 0.1634510     | 0.77 | 0.0000000       | 0.00 | 0.0067826        | 0.96 | 0.0000652        | 8.60  | 25.6915          | 0.96 | 0.0305490       | 0.77 | 0.0000000       | 0.00 | 0.588805        | 0.10 | 0.0003571        | 0.96 | 0.474709         | 8.65  | 51.7403         | 0.10 | 0.0172904        | 0.96 | 8.42503         | 4.64 | 48.2998         | 0.77 | 0.0000000       | 0.00 | 0.0522577       | 0.10 |
| 15D01918                    | 2.8 %  | ✓ 0.1375839     | 0.92 | 0.0000000       | 0.00 | 0.0064178        | 1.01 | 0.0000505        | 10.22 | 24.3099          | 1.01 | 0.0257144       | 0.92 | 0.0000000       | 0.00 | 0.550914        | 0.11 | 0.0003379        | 1.01 | 0.367982         | 10.26 | 48.4108         | 0.11 | 0.0163605        | 1.01 | 7.62242         | 5.15 | 40.6561         | 0.92 | 0.0000000       | 0.00 | 0.0488949       | 0.11 |
| 15D01919                    | 2.9 %  | ✓ 0.0985139     | 1.10 | 0.0000000       | 0.00 | 0.0051896        | 1.22 | 0.0000436        | 12.07 | 19.6577          | 1.22 | 0.0184123       | 1.10 | 0.0000000       | 0.00 | 0.448287        | 0.12 | 0.0002732        | 1.22 | 0.317333         | 12.11 | 39.3925         | 0.12 | 0.0132296        | 1.22 | 5.98670         | 5.68 | 29.1109         | 1.10 | 0.0000000       | 0.00 | 0.0397864       | 0.12 |
| 15D01921                    | 3.0 %  | ✓ 0.0942377     | 1.09 | 0.0000000       | 0.00 | 0.0055093        | 1.16 | 0.0000379        | 13.68 | 20.8684          | 1.16 | 0.0176130       | 1.09 | 0.0000000       | 0.00 | 0.471195        | 0.11 | 0.0002901        | 1.16 | 0.275672         | 13.71 | 41.4056         | 0.11 | 0.0140444        | 1.16 | 6.16898         | 5.28 | 27.8472         | 1.09 | 0.0000000       | 0.00 | 0.0418196       | 0.11 |
| 15D01922                    | 3.2 %  | ✓ 0.1070198     | 1.08 | 0.0000000       | 0.00 | 0.0064938        | 1.00 | 0.0000376        | 14.07 | 24.5979          | 1.00 | 0.0200020       | 1.08 | 0.0000000       | 0.00 | 0.551931        | 0.11 | 0.0003419        | 1.00 | 0.273985         | 14.10 | 48.5001         | 0.11 | 0.0165544        | 1.00 | 6.91171         | 5.23 | 31.6244         | 1.08 | 0.0000000       | 0.00 | 0.0489851       | 0.11 |
| 15D01923                    | 3.4 %  | ✓ 0.0988777     | 1.09 | 0.0000000       | 0.00 | 0.0058483        | 1.10 | 0.0000316        | 17.00 | 22.1528          | 1.10 | 0.0184802       | 1.09 | 0.0000000       | 0.00 | 0.507343        | 0.11 | 0.0003079        | 1.10 | 0.230388         | 17.03 | 44.5820         | 0.11 | 0.0149089        | 1.10 | 6.46295         | 5.24 | 29.2184         | 1.09 | 0.0000000       | 0.00 | 0.0450278       | 0.11 |
| 15D01925                    | 3.6 %  | ✓ 0.1327866     | 0.93 | 0.0000000       | 0.00 | 0.0097500        | 0.70 | 0.0000442        | 12.13 | 36.9319          | 0.70 | 0.0248178       | 0.93 | 0.0000000       | 0.00 | 0.831246        | 0.09 | 0.0005134        | 0.70 | 0.321492         | 12.17 | 73.0445         | 0.09 | 0.0248552        | 0.70 | 11.40988        | 3.37 | 39.2384         | 0.93 | 0.0000000       | 0.00 | 0.0737749       | 0.09 |
| 15D01926                    | 3.8 %  | ✓ 0.1022421     | 1.06 | 0.0000000       | 0.00 | 0.0073595        | 0.87 | 0.0000340        | 15.37 | 27.8770          | 0.87 | 0.0191090       | 1.06 | 0.0000000       | 0.00 | 0.619980        | 0.10 | 0.0003875        | 0.87 | 0.247485         | 15.39 | 54.4798         | 0.10 | 0.0187612        | 0.87 | 8.72617         | 3.90 | 30.2125         | 1.06 | 0.0000000       | 0.00 | 0.0550246       | 0.10 |
| 15D01927                    | 4.0 %  | ✓ 0.1069430     | 1.05 | 0.0000000       | 0.00 | 0.0082987        | 0.81 | 0.0000322        | 16.01 | 31.4344          | 0.81 | 0.0199876       | 1.05 | 0.0000000       | 0.00 | 0.715988        | 0.09 | 0.0004369        | 0.81 | 0.234495         | 16.04 | 62.9164         | 0.09 | 0.0211554        | 0.81 | 9.36139         | 3.76 | 31.6017         | 1.05 | 0.0000000       | 0.00 | 0.0635455       | 0.09 |
| 15D01929                    | 4.3 %  | ✓ 0.1479171     | 0.86 | 0.0000000       | 0.00 | 0.0138037        | 0.54 | 0.0000554        | 9.73  | 52.2867          | 0.54 | 0.0276457       | 0.86 | 0.0000000       | 0.00 | 1.160649        | 0.08 | 0.0007268        | 0.54 | 0.403188         | 9.77  | 101.9903        | 0.08 | 0.0351890        | 0.54 | 16.05763        | 2.46 | 43.7095         | 0.86 | 0.0000000       | 0.00 | 0.1030102       | 0.08 |
| 15D01930                    | 4.6 %  | ✓ 0.1007716     | 1.12 | 0.0000000       | 0.00 | 0.0107638        | 0.66 | 0.0000426        | 12.60 | 40.7721          | 0.66 | 0.0188342       | 1.12 | 0.0000000       | 0.00 | 0.884935        | 0.09 | 0.0005667        | 0.66 | 0.309739         | 12.63 | 77.7623         | 0.09 | 0.0274396        | 0.66 | 12.26475        | 2.88 | 29.7780         | 1.12 | 0.0000000       | 0.00 | 0.0785400       | 0.09 |
| 15D01931                    | 4.9 %  | ✓ 0.1241173     | 1.02 | 0.0000000       | 0.00 | 0.0148821        | 0.51 | 0.0000496        | 11.10 | 56.3715          | 0.51 | 0.0231975       | 1.02 | 0.0000000       | 0.00 | 1.239967        | 0.08 | 0.0007836        | 0.51 | 0.360815         | 11.14 | 108.9602        | 0.08 | 0.0379380        | 0.51 | 16.64427        | 2.35 | 36.6767         | 1.02 | 0.0000000       | 0.00 | 0.1100498       | 0.08 |
| 15D01933                    | 5.2 %  | ✓ 0.1288195     | 1.02 | 0.0000000       | 0.00 | 0.0166495        | 0.49 | 0.0000552        | 10.18 | 63.0661          | 0.49 | 0.0240764       | 1.02 | 0.0000000       | 0.00 | 1.370545        | 0.08 | 0.0008766        | 0.49 | 0.401168         | 10.22 | 120.4346        | 0.08 | 0.0424435        | 0.49 | 17.94388        | 2.26 | 38.0662         | 1.02 | 0.0000000       | 0.00 | 0.1216389       | 0.08 |
| 15D01934                    | 5.5 %  | ✓ 0.1004836     | 1.10 | 0.0000000       | 0.00 | 0.0137699        | 0.56 | 0.0000464        | 11.78 | 52.1588          | 0.56 | 0.0187804       | 1.10 | 0.0000000       | 0.00 | 1.113697        | 0.08 | 0.0007250        | 0.56 | 0.337083         | 11.81 | 97.8645         | 0.08 | 0.0351029        | 0.56 | 14.41678        | 2.42 | 29.6929         | 1.10 | 0.0000000       | 0.00 | 0.0988431       | 0.08 |
| 15D01935                    | 5.8 %  | ✓ 0.1043605     | 1.07 | 0.0000000       | 0.00 | 0.0150386        | 0.53 | 0.0000428        | 12.32 | 56.9645          | 0.53 | 0.0195050       | 1.07 | 0.0000000       | 0.00 | 1.197834        | 0.08 | 0.0007918        | 0.53 | 0.311037         | 12.35 | 105.2578        | 0.08 | 0.0383371        | 0.53 | 15.77902        | 2.22 | 30.8385         | 1.07 | 0.0000000       | 0.00 | 0.1063104       | 0.08 |
| 15D01937                    | 6.1 %  | ✓ 0.1001462     | 1.13 | 0.0000000       | 0.00 | 0.0151871        | 0.52 | 0.0000488        | 11.10 | 57.5269          | 0.52 | 0.0187173       | 1.13 | 0.0000000       | 0.00 | 1.184083        | 0.08 | 0.0007996        | 0.52 | 0.355074         | 11.14 | 104.0495        | 0.08 | 0.0387156        | 0.52 | 15.12802        | 2.34 | 29.5932         | 1.13 | 0.0000000       | 0.00 | 0.1050900       | 0.08 |
| 15D01938                    | 6.5 %  | ✓ 0.1022173     | 1.14 | 0.0000000       | 0.00 | 0.0164414        | 0.51 | 0.0000562        | 9.78  | 62.2782          | 0.51 | 0.0191044       | 1.14 | 0.0000000       | 0.00 | 1.257351        | 0.08 | 0.0008657        | 0.51 | 0.408621         | 9.83  | 110.4878        | 0.08 | 0.0419132        | 0.51 | 16.33762        | 2.23 | 30.2052         | 1.14 | 0.0000000       | 0.00 | 0.1115926       | 0.08 |
| 15D01939                    | 7.0 %  | ✓ 0.1032560     | 1.10 | 0.0000000       | 0.00 | 0.0178027        | 0.49 | 0.0000452        | 11.66 | 67.4343          | 0.49 | 0.0192986       | 1.10 | 0.0000000       | 0.00 | 1.331366        | 0.08 | 0.0009373        | 0.49 | 0.328529         | 11.70 | 116.9918        | 0.08 | 0.0453833        | 0.49 | 17.21963        | 2.06 | 30.5122         | 1.10 | 0.0000000       | 0.00 | 0.1181617       | 0.08 |
| 15D01941                    | 7.6 %  | ✓ 0.1045439     | 1.06 | 0.0000000       | 0.00 | 0.0197292        | 0.45 | 0.0000624        | 8.30  | 74.7319          | 0.45 | 0.0195393       | 1.06 | 0.0000000       | 0.00 | 1.437263        | 0.08 | 0.0010388        | 0.45 | 0.453753         | 8.35  | 126.2973        | 0.08 | 0.0502946        | 0.45 | 18.33685        | 1.90 | 30.8927         | 1.06 | 0.0000000       | 0.00 | 0.1275602       | 0.08 |
| 15D01942                    | 8.4 %  | 0.1231466       | 1.00 | 0.0000000       | 0.00 | 0.0247236        | 0.42 | 0.0000706        | 7.45  | 93.6498          | 0.42 | 0.0230161       | 1.00 | 0.0000000       | 0.00 | 1.718560        | 0.08 | 0.0013017        | 0.42 | 0.513248         | 7.51  | 151.0158        | 0.08 | 0.0630263        | 0.42 | 20.84743        | 1.84 | 36.3898         | 1.00 | 0.0000000       | 0.00 | 0.1525260       | 0.08 |
| 15D01943                    | 9.4 %  | 0.1294786       | 1.02 | 0.0000000       | 0.00 | 0.0275927        | 0.39 | 0.0000992        | 5.39  | 104.5177         | 0.39 | 0.0241996       | 1.02 | 0.0000000       | 0.00 | 1.797799        | 0.08 | 0.0014528        | 0.39 | 0.720314         | 5.47  | 157.9789        | 0.08 | 0.0703404        | 0.39 | 22.05110        | 1.86 | 38.2609         | 1.02 | 0.0000000       | 0.00 | 0.1595586       | 0.08 |
| 15D01945                    | 10.5 % | 0.1305802       | 0.97 | 0.0000000       | 0.00 | 0.0275392        | 0.40 | 0.0000953        | 5.60  | 104.3152         | 0.40 | 0.0244054       | 0.97 | 0.0000000       | 0.00 | 1.617169        | 0.08 | 0.0014500        | 0.40 | 0.691989         | 5.67  | 142.1062        | 0.08 | 0.0702041        | 0.40 | 19.16685        | 2.06 | 38.5864         | 0.97 | 0.0000000       | 0.00 | 0.1435273       | 0.08 |
| 15D01946                    | 11.7 % | 0.1582505       | 0.88 | 0.0000000       | 0.00 | 0.0353696        |      |                  |       |                  |      |                 |      |                 |      |                 |      |                  |      |                  |       |                 |      |                  |      |                 |      |                 |      |                 |      |                 |      |



| Additional<br>Parameters |         | 40Ar/39Ar | 1σ       | 37Ar/39Ar | 1σ       | 36Ar/39Ar | 1σ       | Time<br>(days) | 37Ar<br>(decay) | 39Ar<br>(decay) | 40Ar<br>(moles) |
|--------------------------|---------|-----------|----------|-----------|----------|-----------|----------|----------------|-----------------|-----------------|-----------------|
| 15D01905                 | 1.9 %   | 4.198881  | 0.004060 | 0.457888  | 0.003484 | 0.013783  | 0.000053 | 84.422         | 5.312039        | 1.00059674      | 1.542E-11       |
| 15D01906                 | 2.0 %   | 2.649876  | 0.003034 | 0.464172  | 0.003789 | 0.008486  | 0.000038 | 84.433         | 5.313132        | 1.00059682      | 8.603E-12       |
| 15D01908                 | 2.1 %   | 2.074979  | 0.003282 | 0.466871  | 0.004929 | 0.006532  | 0.000038 | 84.451         | 5.315100        | 1.00059695      | 4.866E-12       |
| 15D01909                 | 2.2 % ✓ | 1.772385  | 0.002822 | 0.487699  | 0.004675 | 0.005561  | 0.000032 | 84.461         | 5.316121        | 1.00059702      | 4.648E-12       |
| 15D01910                 | 2.3 % ✓ | 1.547669  | 0.003574 | 0.480021  | 0.006387 | 0.004844  | 0.000035 | 84.470         | 5.317069        | 1.00059708      | 2.826E-12       |
| 15D01912                 | 2.4 % ✓ | 1.370991  | 0.003103 | 0.482732  | 0.005608 | 0.004227  | 0.000034 | 84.489         | 5.319038        | 1.00059721      | 2.876E-12       |
| 15D01913                 | 2.5 % ✓ | 1.272248  | 0.003041 | 0.495693  | 0.005683 | 0.003863  | 0.000029 | 84.498         | 5.319987        | 1.00059728      | 2.661E-12       |
| 15D01914                 | 2.6 % ✓ | 1.284124  | 0.002968 | 0.496515  | 0.005294 | 0.003898  | 0.000032 | 84.508         | 5.321009        | 1.00059735      | 2.785E-12       |
| 15D01916                 | 2.7 % ✓ | 1.096979  | 0.002551 | 0.496381  | 0.004772 | 0.003290  | 0.000025 | 84.526         | 5.322907        | 1.00059747      | 2.725E-12       |
| 15D01918                 | 2.8 % ✓ | 0.997940  | 0.002653 | 0.501989  | 0.005123 | 0.002975  | 0.000026 | 84.549         | 5.325317        | 1.00059764      | 2.320E-12       |
| 15D01919                 | 2.9 % ✓ | 0.891682  | 0.003146 | 0.498853  | 0.006136 | 0.002633  | 0.000028 | 84.558         | 5.326266        | 1.00059770      | 1.687E-12       |
| 15D01921                 | 3.0 % ✓ | 0.822268  | 0.002974 | 0.503829  | 0.005869 | 0.002409  | 0.000025 | 84.575         | 5.328093        | 1.00059782      | 1.635E-12       |
| 15D01922                 | 3.2 % ✓ | 0.795294  | 0.002555 | 0.506999  | 0.005093 | 0.002340  | 0.000024 | 84.584         | 5.329043        | 1.00059789      | 1.852E-12       |
| 15D01923                 | 3.4 % ✓ | 0.801094  | 0.002777 | 0.496734  | 0.005477 | 0.002349  | 0.000024 | 84.592         | 5.329920        | 1.00059794      | 1.715E-12       |
| 15D01925                 | 3.6 % ✓ | 0.694164  | 0.001727 | 0.505436  | 0.003559 | 0.001951  | 0.000017 | 84.610         | 5.331748        | 1.00059807      | 2.435E-12       |
| 15D01926                 | 3.8 % ✓ | 0.715500  | 0.002274 | 0.511519  | 0.004472 | 0.002012  | 0.000020 | 84.619         | 5.332699        | 1.00059813      | 1.872E-12       |
| 15D01927                 | 4.0 % ✓ | 0.651862  | 0.001958 | 0.499454  | 0.004076 | 0.001832  | 0.000018 | 84.627         | 5.333577        | 1.00059819      | 1.969E-12       |
| 15D01929                 | 4.3 % ✓ | 0.586816  | 0.001244 | 0.512487  | 0.002825 | 0.001586  | 0.000013 | 84.644         | 5.335406        | 1.00059831      | 2.874E-12       |
| 15D01930                 | 4.6 % ✓ | 0.541476  | 0.001583 | 0.524132  | 0.003475 | 0.001434  | 0.000015 | 84.653         | 5.336358        | 1.00059838      | 2.022E-12       |
| 15D01931                 | 4.9 % ✓ | 0.490201  | 0.001154 | 0.517178  | 0.002694 | 0.001276  | 0.000012 | 84.662         | 5.337236        | 1.00059843      | 2.565E-12       |
| 15D01933                 | 5.2 % ✓ | 0.465912  | 0.001040 | 0.523470  | 0.002582 | 0.001208  | 0.000011 | 84.679         | 5.339067        | 1.00059856      | 2.694E-12       |
| 15D01934                 | 5.5 % ✓ | 0.451570  | 0.001263 | 0.532779  | 0.002992 | 0.001168  | 0.000011 | 84.688         | 5.339946        | 1.00059862      | 2.122E-12       |
| 15D01935                 | 5.8 % ✓ | 0.443738  | 0.001167 | 0.540994  | 0.002887 | 0.001134  | 0.000011 | 84.697         | 5.340898        | 1.00059868      | 2.243E-12       |
| 15D01937                 | 6.1 % ✓ | 0.430657  | 0.001188 | 0.552675  | 0.002886 | 0.001109  | 0.000011 | 84.714         | 5.342730        | 1.00059880      | 2.152E-12       |
| 15D01938                 | 6.5 % ✓ | 0.422099  | 0.001109 | 0.563452  | 0.002883 | 0.001074  | 0.000011 | 84.722         | 5.343609        | 1.00059886      | 2.239E-12       |
| 15D01939                 | 7.0 % ✓ | 0.408844  | 0.001056 | 0.576179  | 0.002838 | 0.001035  | 0.000010 | 84.731         | 5.344562        | 1.00059892      | 2.297E-12       |
| 15D01941                 | 7.6 % ✓ | 0.390646  | 0.000973 | 0.591479  | 0.002690 | 0.000984  | 0.000009 | 84.749         | 5.346395        | 1.00059905      | 2.369E-12       |
| 15D01942                 | 8.4 %   | 0.379866  | 0.000829 | 0.619874  | 0.002649 | 0.000979  | 0.000008 | 84.757         | 5.347275        | 1.00059911      | 2.755E-12       |
| 15D01943                 | 9.4 %   | 0.382613  | 0.000798 | 0.661299  | 0.002645 | 0.000994  | 0.000008 | 84.766         | 5.348229        | 1.00059917      | 2.903E-12       |
| 15D01945                 | 10.5 %  | 0.407218  | 0.000884 | 0.733702  | 0.002971 | 0.001113  | 0.000009 | 84.783         | 5.350063        | 1.00059929      | 2.779E-12       |
| 15D01946                 | 11.7 %  | 0.444015  | 0.000861 | 0.896512  | 0.003361 | 0.001296  | 0.000009 | 84.792         | 5.350944        | 1.00059935      | 3.185E-12       |
| 15D01947                 | 13.1 %  | 0.511018  | 0.000899 | 1.062956  | 0.003843 | 0.001556  | 0.000010 | 84.801         | 5.351898        | 1.00059942      | 3.575E-12       |
| 15D01949                 | 14.7 %  | 0.580527  | 0.001093 | 1.077210  | 0.004089 | 0.001822  | 0.000012 | 84.818         | 5.353734        | 1.00059954      | 3.334E-12       |
| 15D01950                 | 16.5 %  | 0.632911  | 0.001156 | 1.387376  | 0.005045 | 0.002083  | 0.000014 | 84.826         | 5.354615        | 1.00059960      | 3.437E-12       |
| 15D01951                 | 18.3 %  | 0.730491  | 0.001709 | 1.771670  | 0.006717 | 0.002530  | 0.000018 | 84.835         | 5.355570        | 1.00059966      | 2.608E-12       |
| 15D01953                 | 20.2 %  | 0.787663  | 0.002294 | 2.058884  | 0.008256 | 0.002798  | 0.000022 | 84.853         | 5.357407        | 1.00059978      | 2.071E-12       |
| 15D01954                 | 22.2 %  | 0.972267  | 0.002417 | 2.696424  | 0.010118 | 0.003594  | 0.000027 | 84.862         | 5.358362        | 1.00059985      | 2.487E-12       |
| 15D01956                 | 24.5 %  | 1.032486  | 0.001966 | 3.237027  | 0.011403 | 0.003905  | 0.000024 | 84.880         | 5.360274        | 1.00059997      | 3.378E-12       |



| Procedure<br>Blanks |        | 36Ar<br>[fA] | 1σ        | 37Ar<br>[fA] | 1σ        | 38Ar<br>[fA] | 1σ        | 39Ar<br>[fA] | 1σ        | 40Ar<br>[fA] | 1σ        |
|---------------------|--------|--------------|-----------|--------------|-----------|--------------|-----------|--------------|-----------|--------------|-----------|
| 15D01905            | 1.9 %  | 0.0106039    | 0.0005961 | 0.0335125    | 0.0300595 | 0.0499483    | 0.0271597 | 0.0152760    | 0.0249970 | 2.8689848    | 0.1135415 |
| 15D01906            | 2.0 %  | 0.0105167    | 0.0005961 | 0.0336999    | 0.0300595 | 0.0524023    | 0.0271597 | 0.0129417    | 0.0249970 | 2.8505289    | 0.1135415 |
| 15D01908            | 2.1 %  | 0.0103665    | 0.0005961 | 0.0339014    | 0.0300595 | 0.0565949    | 0.0271597 | 0.0090524    | 0.0249970 | 2.8188165    | 0.1135415 |
| 15D01909            | 2.2 %  | 0.0102920    | 0.0005961 | 0.0339372    | 0.0300595 | 0.0586550    | 0.0271597 | 0.0071940    | 0.0249970 | 2.8031363    | 0.1135415 |
| 15D01910            | 2.3 %  | 0.0102250    | 0.0005961 | 0.0339285    | 0.0300595 | 0.0604985    | 0.0271597 | 0.0055650    | 0.0249970 | 2.7890429    | 0.1135415 |
| 15D01912            | 2.4 %  | 0.0100922    | 0.0005961 | 0.0337812    | 0.0300595 | 0.0641131    | 0.0271597 | 0.0024794    | 0.0249970 | 2.7612082    | 0.1135415 |
| 15D01913            | 2.5 %  | 0.0100314    | 0.0005961 | 0.0336481    | 0.0300595 | 0.0657505    | 0.0271597 | 0.0011371    | 0.0249970 | 2.7484979    | 0.1135415 |
| 15D01914            | 2.6 %  | 0.0099681    | 0.0005961 | 0.0334596    | 0.0300595 | 0.0674388    | 0.0271597 | 0.0002043    | 0.0249970 | 2.7353124    | 0.1135415 |
| 15D01916            | 2.7 %  | 0.0098568    | 0.0005961 | 0.0329850    | 0.0300595 | 0.0703683    | 0.0271597 | 0.0024090    | 0.0249970 | 2.7122083    | 0.1135415 |
| 15D01918            | 2.8 %  | 0.0097272    | 0.0005961 | 0.0321497    | 0.0300595 | 0.0737006    | 0.0271597 | 0.0046705    | 0.0249970 | 2.6854730    | 0.1135415 |
| 15D01919            | 2.9 %  | 0.0096797    | 0.0005961 | 0.0317492    | 0.0300595 | 0.0748948    | 0.0271597 | 0.0053967    | 0.0249970 | 2.6757361    | 0.1135415 |
| 15D01921            | 3.0 %  | 0.0095941    | 0.0005961 | 0.0308652    | 0.0300595 | 0.0770030    | 0.0271597 | 0.0065312    | 0.0249970 | 2.6582747    | 0.1135415 |
| 15D01922            | 3.2 %  | 0.0095525    | 0.0005961 | 0.0303464    | 0.0300595 | 0.0780015    | 0.0271597 | 0.0069851    | 0.0249970 | 2.6498518    | 0.1135415 |
| 15D01923            | 3.4 %  | 0.0095159    | 0.0005961 | 0.0298317    | 0.0300595 | 0.0788636    | 0.0271597 | 0.0073213    | 0.0249970 | 2.6424757    | 0.1135415 |
| 15D01925            | 3.6 %  | 0.0094451    | 0.0005961 | 0.0286487    | 0.0300595 | 0.0804764    | 0.0271597 | 0.0077669    | 0.0249970 | 2.6283389    | 0.1135415 |
| 15D01926            | 3.8 %  | 0.0094113    | 0.0005961 | 0.0279745    | 0.0300595 | 0.0812172    | 0.0271597 | 0.0078625    | 0.0249970 | 2.6216447    | 0.1135415 |
| 15D01927            | 4.0 %  | 0.0093818    | 0.0005961 | 0.0273162    | 0.0300595 | 0.0818415    | 0.0271597 | 0.0078680    | 0.0249970 | 2.6158644    | 0.1135415 |
| 15D01929            | 4.3 %  | 0.0093260    | 0.0005961 | 0.0258342    | 0.0300595 | 0.0829589    | 0.0271597 | 0.0076246    | 0.0249970 | 2.6050522    | 0.1135415 |
| 15D01930            | 4.6 %  | 0.0092999    | 0.0005961 | 0.0250044    | 0.0300595 | 0.0834420    | 0.0271597 | 0.0073619    | 0.0249970 | 2.6000868    | 0.1135415 |
| 15D01931            | 4.9 %  | 0.0092776    | 0.0005961 | 0.0242026    | 0.0300595 | 0.0838285    | 0.0271597 | 0.0070367    | 0.0249970 | 2.5959023    | 0.1135415 |
| 15D01933            | 5.2 %  | 0.0092367    | 0.0005961 | 0.0224215    | 0.0300595 | 0.0844505    | 0.0271597 | 0.0061044    | 0.0249970 | 2.5884146    | 0.1135415 |
| 15D01934            | 5.5 %  | 0.0092197    | 0.0005961 | 0.0215135    | 0.0300595 | 0.0846610    | 0.0271597 | 0.0055345    | 0.0249970 | 2.5854110    | 0.1135415 |
| 15D01935            | 5.8 %  | 0.0092032    | 0.0005961 | 0.0204909    | 0.0300595 | 0.0848246    | 0.0271597 | 0.0048275    | 0.0249970 | 2.5825893    | 0.1135415 |
| 15D01937            | 6.1 %  | 0.0091772    | 0.0005961 | 0.0184108    | 0.0300595 | 0.0849511    | 0.0271597 | 0.0032061    | 0.0249970 | 2.5784263    | 0.1135415 |
| 15D01938            | 6.5 %  | 0.0091674    | 0.0005961 | 0.0173592    | 0.0300595 | 0.0849238    | 0.0271597 | 0.0023055    | 0.0249970 | 2.5770185    | 0.1135415 |
| 15D01939            | 7.0 %  | 0.0091587    | 0.0005961 | 0.0161811    | 0.0300595 | 0.0848299    | 0.0271597 | 0.0012403    | 0.0249970 | 2.5759256    | 0.1135415 |
| 15D01941            | 7.6 %  | 0.0091476    | 0.0005961 | 0.0138020    | 0.0300595 | 0.0844609    | 0.0271597 | 0.0010701    | 0.0249970 | 2.5750871    | 0.1135415 |
| 15D01942            | 8.4 %  | 0.0091449    | 0.0005961 | 0.0126069    | 0.0300595 | 0.0841958    | 0.0271597 | 0.0023014    | 0.0249970 | 2.5752751    | 0.1135415 |
| 15D01943            | 9.4 %  | 0.0091440    | 0.0005961 | 0.0112733    | 0.0300595 | 0.0838442    | 0.0271597 | 0.0037249    | 0.0249970 | 2.5759110    | 0.1135415 |
| 15D01945            | 10.5 % | 0.0091478    | 0.0005961 | 0.0085951    | 0.0300595 | 0.0829797    | 0.0271597 | 0.0067242    | 0.0249970 | 2.5783971    | 0.1135415 |
| 15D01946            | 11.7 % | 0.0091523    | 0.0005961 | 0.0072564    | 0.0300595 | 0.0824768    | 0.0271597 | 0.0082863    | 0.0249970 | 2.5801809    | 0.1135415 |
| 15D01947            | 13.1 % | 0.0091591    | 0.0005961 | 0.0057674    | 0.0300595 | 0.0818676    | 0.0271597 | 0.0100680    | 0.0249970 | 2.5825456    | 0.1135415 |
| 15D01949            | 14.7 % | 0.0091778    | 0.0005961 | 0.0027901    | 0.0300595 | 0.0805077    | 0.0271597 | 0.0137563    | 0.0249970 | 2.5883563    | 0.1135415 |
| 15D01950            | 16.5 % | 0.0091895    | 0.0005961 | 0.0013079    | 0.0300595 | 0.0797669    | 0.0271597 | 0.0156491    | 0.0249970 | 2.5917359    | 0.1135415 |
| 15D01951            | 18.3 % | 0.0092040    | 0.0005961 | 0.0003366    | 0.0300595 | 0.0789000    | 0.0271597 | 0.0177891    | 0.0249970 | 2.5958293    | 0.1135415 |
| 15D01953            | 20.2 % | 0.0092377    | 0.0005961 | 0.0036129    | 0.0300595 | 0.0770447    | 0.0271597 | 0.0221664    | 0.0249970 | 2.6049647    | 0.1135415 |
| 15D01954            | 22.2 % | 0.0092581    | 0.0005961 | 0.0053757    | 0.0300595 | 0.0759820    | 0.0271597 | 0.0245788    | 0.0249970 | 2.6103720    | 0.1135415 |
| 15D01956            | 24.5 % | 0.0093051    | 0.0005961 | 0.0090225    | 0.0300595 | 0.0736557    | 0.0271597 | 0.0296829    | 0.0249970 | 2.6225350    | 0.1135415 |



| OSU Argon Geochronology Lab |        |           |           |        |                |         |        |        |                |          |          |        |                |          |        |        |                |           |         |        |                |      |    |    |  |
|-----------------------------|--------|-----------|-----------|--------|----------------|---------|--------|--------|----------------|----------|----------|--------|----------------|----------|--------|--------|----------------|-----------|---------|--------|----------------|------|----|----|--|
| Intercept<br>Values         | 36Ar   |           |           |        |                | 37Ar    |        |        |                |          | 38Ar     |        |                |          |        | 39Ar   |                |           |         |        | 40Ar           |      |    |    |  |
|                             |        | [fA]      | 1σ        | r2     |                |         | [fA]   | 1σ     | r2             |          |          | [fA]   | 1σ             | r2       |        |        | [fA]           | 1σ        | r2      |        |                | [fA] | 1σ | r2 |  |
| 15D01905                    | 1.9 %  | 1.0023073 | 0.0021823 | 0.9001 | EXP 150 of 150 | 6.4999  | 0.0325 | 0.5185 | EXP 150 of 150 | 3.557767 | 0.026776 | 0.4138 | EXP 150 of 150 | 75.9707  | 0.0329 | 0.9957 | EXP 150 of 150 | 324.93682 | 0.04656 | 0.9980 | EXP 150 of 150 |      |    |    |  |
| 15D01906                    | 2.0 %  | 0.5503875 | 0.0016402 | 0.7908 | EXP 150 of 150 | 5.8290  | 0.0310 | 0.5042 | EXP 150 of 150 | 2.562827 | 0.026191 | 0.2819 | EXP 150 of 150 | 67.1772  | 0.0325 | 0.9946 | EXP 150 of 150 | 182.57983 | 0.03879 | 0.9902 | EXP 150 of 150 |      |    |    |  |
| 15D01908                    | 2.1 %  | 0.3105226 | 0.0013133 | 0.5143 | EXP 150 of 150 | 4.2424  | 0.0295 | 0.2921 | EXP 150 of 150 | 1.630287 | 0.023267 | 0.1896 | EXP 150 of 150 | 48.5190  | 0.0294 | 0.9917 | EXP 150 of 150 | 104.46704 | 0.03630 | 0.6731 | EXP 150 of 150 |      |    |    |  |
| 15D01909                    | 2.2 %  | 0.2960623 | 0.0012544 | 0.5072 | EXP 150 of 150 | 4.9498  | 0.0323 | 0.4318 | EXP 150 of 150 | 1.607399 | 0.023985 | 0.2311 | EXP 150 of 150 | 54.2620  | 0.0311 | 0.9924 | EXP 150 of 150 | 99.91033  | 0.03555 | 0.4648 | EXP 150 of 150 |      |    |    |  |
| 15D01910                    | 2.3 %  | 0.1835316 | 0.0009380 | 0.2872 | EXP 150 of 150 | 3.4017  | 0.0312 | 0.1847 | EXP 150 of 150 | 0.972562 | 0.028160 | 0.0221 | EXP 150 of 150 | 37.7757  | 0.0241 | 0.9905 | EXP 150 of 150 | 61.82029  | 0.03202 | 0.9454 | EXP 150 of 150 |      |    |    |  |
| 15D01912                    | 2.4 %  | 0.1838625 | 0.0011483 | 0.2286 | EXP 150 of 150 | 3.9235  | 0.0310 | 0.2417 | EXP 150 of 150 | 0.987445 | 0.027025 | 0.0143 | EXP 150 of 150 | 43.3978  | 0.0294 | 0.9894 | EXP 150 of 150 | 62.84158  | 0.03098 | 0.9297 | EXP 150 of 150 |      |    |    |  |
| 15D01913                    | 2.5 %  | 0.1683361 | 0.0008915 | 0.1944 | EXP 150 of 150 | 4.0149  | 0.0316 | 0.3964 | EXP 150 of 150 | 0.968581 | 0.026651 | 0.0752 | EXP 150 of 150 | 43.2631  | 0.0268 | 0.9914 | EXP 149 of 150 | 58.33038  | 0.03182 | 0.9473 | EXP 150 of 150 |      |    |    |  |
| 15D01914                    | 2.6 %  | 0.1756487 | 0.0010823 | 0.1347 | EXP 150 of 150 | 4.1685  | 0.0290 | 0.4445 | EXP 150 of 150 | 0.957096 | 0.028295 | 0.1074 | EXP 150 of 150 | 44.8670  | 0.0286 | 0.9908 | EXP 150 of 150 | 60.91771  | 0.03311 | 0.9303 | EXP 150 of 150 |      |    |    |  |
| 15D01916                    | 2.7 %  | 0.1700413 | 0.0009060 | 0.2167 | EXP 150 of 150 | 4.7666  | 0.0302 | 0.4410 | EXP 150 of 150 | 1.009977 | 0.029402 | 0.0654 | EXP 150 of 150 | 51.3923  | 0.0283 | 0.9931 | EXP 150 of 150 | 59.64630  | 0.03588 | 0.9176 | EXP 150 of 150 |      |    |    |  |
| 15D01918                    | 2.8 %  | 0.1452241 | 0.0009483 | 0.1101 | EXP 150 of 150 | 4.5092  | 0.0309 | 0.5101 | EXP 150 of 150 | 0.859096 | 0.025044 | 0.0651 | EXP 150 of 150 | 48.0829  | 0.0311 | 0.9908 | EXP 150 of 150 | 51.14651  | 0.03050 | 0.9595 | EXP 150 of 150 |      |    |    |  |
| 15D01919                    | 2.9 %  | 0.1072652 | 0.0007689 | 0.0089 | EXP 150 of 150 | 3.6514  | 0.0304 | 0.3903 | EXP 150 of 150 | 0.699324 | 0.026123 | 0.0538 | EXP 150 of 150 | 39.1240  | 0.0279 | 0.9881 | EXP 150 of 150 | 37.91028  | 0.02841 | 0.9825 | EXP 150 of 150 |      |    |    |  |
| 15D01921                    | 3.0 %  | 0.1034525 | 0.0007058 | 0.0280 | EXP 150 of 150 | 3.8721  | 0.0305 | 0.3131 | EXP 150 of 150 | 0.677932 | 0.025309 | 0.0277 | EXP 150 of 150 | 41.1226  | 0.0265 | 0.9906 | EXP 150 of 150 | 36.81050  | 0.02962 | 0.9807 | EXP 150 of 150 |      |    |    |  |
| 15D01922                    | 3.2 %  | 0.1163598 | 0.0008531 | 0.0570 | EXP 150 of 150 | 4.5572  | 0.0305 | 0.4560 | EXP 150 of 150 | 0.757376 | 0.026516 | 0.0207 | EXP 150 of 150 | 48.1695  | 0.0299 | 0.9912 | EXP 150 of 150 | 41.34162  | 0.02893 | 0.9769 | EXP 148 of 150 |      |    |    |  |
| 15D01923                    | 3.4 %  | 0.1080519 | 0.0007608 | 0.0328 | EXP 150 of 150 | 4.1061  | 0.0304 | 0.3276 | EXP 150 of 150 | 0.667927 | 0.027422 | 0.0117 | EXP 150 of 150 | 44.2769  | 0.0272 | 0.9913 | EXP 150 of 150 | 38.46764  | 0.03171 | 0.9769 | EXP 150 of 150 |      |    |    |  |
| 15D01925                    | 3.6 %  | 0.1435579 | 0.0009143 | 0.1071 | EXP 150 of 150 | 6.8220  | 0.0295 | 0.6534 | EXP 150 of 150 | 1.082443 | 0.027072 | 0.0273 | EXP 149 of 150 | 72.5492  | 0.0335 | 0.9953 | EXP 150 of 150 | 53.49073  | 0.03141 | 0.9533 | EXP 149 of 150 |      |    |    |  |
| 15D01926                    | 3.8 %  | 0.1125356 | 0.0007616 | 0.0007 | EXP 150 of 150 | 5.1548  | 0.0285 | 0.5332 | EXP 150 of 150 | 0.794338 | 0.025783 | 0.0347 | EXP 150 of 150 | 54.1085  | 0.0285 | 0.9936 | EXP 150 of 150 | 41.72324  | 0.03244 | 0.9718 | EXP 150 of 150 |      |    |    |  |
| 15D01927                    | 4.0 %  | 0.1178095 | 0.0008082 | 0.0467 | EXP 150 of 150 | 5.8075  | 0.0308 | 0.4957 | EXP 149 of 150 | 0.876580 | 0.025083 | 0.0163 | EXP 150 of 150 | 62.4883  | 0.0292 | 0.9949 | EXP 150 of 150 | 43.75593  | 0.02998 | 0.9744 | EXP 150 of 150 |      |    |    |  |
| 15D01929                    | 4.3 %  | 0.1614942 | 0.0009338 | 0.1034 | EXP 150 of 150 | 9.6370  | 0.0298 | 0.7903 | EXP 150 of 150 | 1.488775 | 0.027259 | 0.1265 | EXP 150 of 150 | 101.3023 | 0.0360 | 0.9971 | EXP 150 of 150 | 62.64080  | 0.02933 | 0.9369 | EXP 150 of 150 |      |    |    |  |
| 15D01930                    | 4.6 %  | 0.1142512 | 0.0008165 | 0.0020 | EXP 150 of 150 | 7.5182  | 0.0307 | 0.7192 | EXP 150 of 150 | 1.115020 | 0.027117 | 0.0654 | EXP 150 of 150 | 77.2369  | 0.0307 | 0.9964 | EXP 150 of 150 | 44.83789  | 0.03181 | 0.9698 | EXP 150 of 150 |      |    |    |  |
| 15D01931                    | 4.9 %  | 0.1400683 | 0.0009467 | 0.0505 | EXP 150 of 150 | 10.3826 | 0.0289 | 0.8168 | EXP 150 of 150 | 1.520040 | 0.028448 | 0.0932 | EXP 150 of 150 | 108.2267 | 0.0357 | 0.9976 | EXP 150 of 150 | 56.17467  | 0.03359 | 0.9527 | EXP 150 of 150 |      |    |    |  |
| 15D01933                    | 5.2 %  | 0.1461180 | 0.0009975 | 0.1035 | EXP 150 of 150 | 11.6071 | 0.0300 | 0.8350 | EXP 150 of 150 | 1.689111 | 0.029420 | 0.1225 | EXP 150 of 150 | 119.6260 | 0.0329 | 0.9983 | EXP 150 of 150 | 58.87535  | 0.03088 | 0.9513 | EXP 148 of 150 |      |    |    |  |
| 15D01934                    | 5.5 %  | 0.1167312 | 0.0007911 | 0.0253 | EXP 150 of 150 | 9.6010  | 0.0313 | 0.7565 | EXP 150 of 150 | 1.366717 | 0.027991 | 0.1038 | EXP 150 of 150 | 97.2074  | 0.0356 | 0.9970 | EXP 150 of 150 | 46.91622  | 0.03354 | 0.9669 | EXP 150 of 150 |      |    |    |  |
| 15D01935                    | 5.8 %  | 0.1215514 | 0.0007953 | 0.0001 | EXP 150 of 150 | 10.4807 | 0.0319 | 0.7541 | EXP 150 of 150 | 1.424677 | 0.026053 | 0.0639 | EXP 149 of 150 | 104.5528 | 0.0335 | 0.9977 | EXP 150 of 150 | 49.43569  | 0.02950 | 0.9735 | EXP 150 of 150 |      |    |    |  |
| 15D01937                    | 6.1 %  | 0.1177067 | 0.0008142 | 0.0207 | EXP 150 of 150 | 10.5783 | 0.0303 | 0.7712 | EXP 150 of 150 | 1.453679 | 0.027561 | 0.0894 | EXP 150 of 150 | 103.3550 | 0.0310 | 0.9980 | EXP 150 of 150 | 47.52871  | 0.03448 | 0.9636 | EXP 150 of 150 |      |    |    |  |
| 15D01938                    | 6.5 %  | 0.1208318 | 0.0008561 | 0.0028 | EXP 150 of 150 | 11.4475 | 0.0330 | 0.7948 | EXP 150 of 150 | 1.579337 | 0.028270 | 0.1063 | EXP 150 of 150 | 109.7522 | 0.0307 | 0.9982 | EXP 150 of 150 | 49.36049  | 0.02928 | 0.9735 | EXP 150 of 150 |      |    |    |  |
| 15D01939                    | 7.0 %  | 0.1230701 | 0.0008093 | 0.0001 | EXP 149 of 150 | 12.3905 | 0.0337 | 0.8025 | EXP 150 of 150 | 1.573695 | 0.026034 | 0.0312 | EXP 150 of 150 | 116.2151 | 0.0342 | 0.9980 | EXP 150 of 150 | 50.55822  | 0.03201 | 0.9676 | EXP 150 of 150 |      |    |    |  |
| 15D01941                    | 7.6 %  | 0.1260988 | 0.0007831 | 0.0159 | EXP 150 of 150 | 13.7225 | 0.0305 | 0.8572 | EXP 150 of 150 | 1.802550 | 0.024882 | 0.2039 | EXP 150 of 150 | 125.4625 | 0.0365 | 0.9981 | EXP 150 of 150 | 52.06875  | 0.02834 | 0.9720 | EXP 149 of 150 |      |    |    |  |
| 15D01942                    | 8.4 %  | 0.1482994 | 0.0009045 | 0.1922 | EXP 150 of 150 | 17.1888 | 0.0357 | 0.8793 | EXP 150 of 150 | 2.142916 | 0.025556 | 0.0628 | EXP 150 of 150 | 150.0216 | 0.0340 | 0.9988 | EXP 150 of 150 | 60.12380  | 0.03153 | 0.9536 | EXP 150 of 150 |      |    |    |  |
| 15D01943                    | 9.4 %  | 0.1569799 | 0.0009994 | 0.0803 | EXP 150 of 150 | 19.1773 | 0.0312 | 0.9246 | EXP 150 of 150 | 2.427208 | 0.025936 | 0.2366 | EXP 150 of 150 | 156.9444 | 0.0377 | 0.9987 | EXP 150 of 150 | 63.21477  | 0.03137 | 0.9498 | EXP 150 of 150 |      |    |    |  |
| 15D01945                    | 10.5 % | 0.1579659 | 0.0009339 | 0.1251 | EXP 150 of 150 | 19.1309 | 0.0333 | 0.9137 | EXP 150 of 150 | 2.222005 | 0.025940 | 0.1879 | EXP 150 of 150 | 141.1859 | 0.0370 | 0.9984 | EXP 150 of 150 | 60.63535  | 0.03129 | 0.9502 | EXP 150 of 150 |      |    |    |  |
| 15D01946                    | 11.7 % | 0.1913852 | 0.0010344 | 0.2397 | EXP 150 of 150 | 24.5627 | 0.0317 | 0.9497 | EXP 150 of 150 | 2.480348 | 0.029367 | 0.2140 | EXP 150 of 150 | 148.4015 | 0.0360 | 0.9987 | EXP 150 of 150 | 69.11796  | 0.03424 | 0.8972 | EXP 150 of 150 |      |    |    |  |
| 15D01947                    | 13.1 % | 0.2224522 | 0.0010269 | 0.2894 | EXP 150 of 150 | 28.3933 | 0.0292 | 0.9669 | EXP 150 of 150 | 2.525768 | 0.029106 | 0.2265 | EXP 150 of 150 | 144.7247 | 0.0370 | 0.9985 | EXP 150 of 150 | 77.26269  | 0.03283 | 0.8016 | EXP 150 of 150 |      |    |    |  |
| 15D01949                    | 14.7 % | 0.2142143 | 0.0010932 | 0.3869 | EXP 150 of 150 | 23.6138 | 0.0321 | 0.9439 | EXP 150 of 150 | 2.074342 | 0.028306 | 0.0664 | EXP 149 of 150 | 118.8261 | 0.0356 | 0.9979 | EXP 150 of 150 | 72.24142  | 0.03559 | 0.7993 | EXP 150 of 150 |      |    |    |  |
| 15D01950                    | 16.5 % | 0.2308519 | 0.0012389 | 0.3385 | EXP 150 of 150 | 28.7528 | 0.0313 | 0.9642 | EXP 150 of 150 | 2.173958 | 0.026765 | 0.2820 | EXP 149 of 150 | 112.3691 | 0.0337 | 0.9979 | EXP 150 of 150 | 74.40186  | 0.03238 | 0.7874 | EXP 150 of 150 |      |    |    |  |
| 15D01951                    | 18.3 % | 0.1862130 | 0.0009520 | 0.2476 | EXP 150 of 150 | 24.1299 | 0.0317 | 0.9493 | EXP 150 of 150 | 1.395033 | 0.026529 | 0.1025 | EXP 150 of 150 | 73.8722  | 0.0306 | 0.9961 | EXP 150 of 150 | 57.07719  | 0.03213 | 0.9441 | EXP 150 of 150 |      |    |    |  |
|                             |        |           |           |        |                |         |        |        |                |          |          |        |                |          |        |        |                |           |         |        |                |      |    |    |  |







[illegible]



| Irradiation<br>Constants | 40/36(a) |       | %1σ | 40/36(c) |    | %1σ    | 38/36(a) |       | %1σ | 38/36(c) |   | %1σ       | 39/37(ca) |          | %1σ | 38/37(ca) |   | %1σ     | 36/37(ca) |   | %1σ | 40/39(k) |      | %1σ | 38/39(k) |   | %1σ | 36/38(cl) |   | %1σ | K/Ca | %1σ | K/Cl | %1σ | Ca/Cl | %1σ |
|--------------------------|----------|-------|-----|----------|----|--------|----------|-------|-----|----------|---|-----------|-----------|----------|-----|-----------|---|---------|-----------|---|-----|----------|------|-----|----------|---|-----|-----------|---|-----|------|-----|------|-----|-------|-----|
|                          |          |       |     |          |    |        |          |       |     |          |   |           |           |          |     |           |   |         |           |   |     |          |      |     |          |   |     |           |   |     |      |     |      |     |       |     |
| 15D01905                 | 1.9 %    | 295.5 | 0   | 0.018    | 35 | 0.1869 | 0        | 1.493 | 3   | 0.000673 | 0 | 0.0000139 | 0         | 0.000264 | 0   | 0.00101   | 0 | 0.01138 | 0         | 0 | 0   | 0        | 0.43 | 0   | 0        | 0 | 0   | 0         | 0 | 0   | 0    | 0   | 0    | 0   | 0     | 0   |
| 15D01906                 | 2.0 %    | 295.5 | 0   | 0.018    | 35 | 0.1869 | 0        | 1.493 | 3   | 0.000673 | 0 | 0.0000139 | 0         | 0.000264 | 0   | 0.00101   | 0 | 0.01138 | 0         | 0 | 0   | 0        | 0.43 | 0   | 0        | 0 | 0   | 0         | 0 | 0   | 0    | 0   | 0    | 0   | 0     | 0   |
| 15D01908                 | 2.1 %    | 295.5 | 0   | 0.018    | 35 | 0.1869 | 0        | 1.493 | 3   | 0.000673 | 0 | 0.0000139 | 0         | 0.000264 | 0   | 0.00101   | 0 | 0.01138 | 0         | 0 | 0   | 0        | 0.43 | 0   | 0        | 0 | 0   | 0         | 0 | 0   | 0    | 0   | 0    | 0   | 0     | 0   |
| 15D01909                 | 2.2 %    | 295.5 | 0   | 0.018    | 35 | 0.1869 | 0        | 1.493 | 3   | 0.000673 | 0 | 0.0000139 | 0         | 0.000264 | 0   | 0.00101   | 0 | 0.01138 | 0         | 0 | 0   | 0        | 0.43 | 0   | 0        | 0 | 0   | 0         | 0 | 0   | 0    | 0   | 0    | 0   | 0     | 0   |
| 15D01910                 | 2.3 %    | 295.5 | 0   | 0.018    | 35 | 0.1869 | 0        | 1.493 | 3   | 0.000673 | 0 | 0.0000139 | 0         | 0.000264 | 0   | 0.00101   | 0 | 0.01138 | 0         | 0 | 0   | 0        | 0.43 | 0   | 0        | 0 | 0   | 0         | 0 | 0   | 0    | 0   | 0    | 0   | 0     | 0   |
| 15D01912                 | 2.4 %    | 295.5 | 0   | 0.018    | 35 | 0.1869 | 0        | 1.493 | 3   | 0.000673 | 0 | 0.0000139 | 0         | 0.000264 | 0   | 0.00101   | 0 | 0.01138 | 0         | 0 | 0   | 0        | 0.43 | 0   | 0        | 0 | 0   | 0         | 0 | 0   | 0    | 0   | 0    | 0   | 0     | 0   |
| 15D01913                 | 2.5 %    | 295.5 | 0   | 0.018    | 35 | 0.1869 | 0        | 1.493 | 3   | 0.000673 | 0 | 0.0000139 | 0         | 0.000264 | 0   | 0.00101   | 0 | 0.01138 | 0         | 0 | 0   | 0        | 0.43 | 0   | 0        | 0 | 0   | 0         | 0 | 0   | 0    | 0   | 0    | 0   | 0     | 0   |
| 15D01914                 | 2.6 %    | 295.5 | 0   | 0.018    | 35 | 0.1869 | 0        | 1.493 | 3   | 0.000673 | 0 | 0.0000139 | 0         | 0.000264 | 0   | 0.00101   | 0 | 0.01138 | 0         | 0 | 0   | 0        | 0.43 | 0   | 0        | 0 | 0   | 0         | 0 | 0   | 0    | 0   | 0    | 0   | 0     | 0   |
| 15D01916                 | 2.7 %    | 295.5 | 0   | 0.018    | 35 | 0.1869 | 0        | 1.493 | 3   | 0.000673 | 0 | 0.0000139 | 0         | 0.000264 | 0   | 0.00101   | 0 | 0.01138 | 0         | 0 | 0   | 0        | 0.43 | 0   | 0        | 0 | 0   | 0         | 0 | 0   | 0    | 0   | 0    | 0   | 0     | 0   |
| 15D01918                 | 2.8 %    | 295.5 | 0   | 0.018    | 35 | 0.1869 | 0        | 1.493 | 3   | 0.000673 | 0 | 0.0000139 | 0         | 0.000264 | 0   | 0.00101   | 0 | 0.01138 | 0         | 0 | 0   | 0        | 0.43 | 0   | 0        | 0 | 0   | 0         | 0 | 0   | 0    | 0   | 0    | 0   | 0     | 0   |
| 15D01919                 | 2.9 %    | 295.5 | 0   | 0.018    | 35 | 0.1869 | 0        | 1.493 | 3   | 0.000673 | 0 | 0.0000139 | 0         | 0.000264 | 0   | 0.00101   | 0 | 0.01138 | 0         | 0 | 0   | 0        | 0.43 | 0   | 0        | 0 | 0   | 0         | 0 | 0   | 0    | 0   | 0    | 0   | 0     | 0   |
| 15D01921                 | 3.0 %    | 295.5 | 0   | 0.018    | 35 | 0.1869 | 0        | 1.493 | 3   | 0.000673 | 0 | 0.0000139 | 0         | 0.000264 | 0   | 0.00101   | 0 | 0.01138 | 0         | 0 | 0   | 0        | 0.43 | 0   | 0        | 0 | 0   | 0         | 0 | 0   | 0    | 0   | 0    | 0   | 0     | 0   |
| 15D01922                 | 3.2 %    | 295.5 | 0   | 0.018    | 35 | 0.1869 | 0        | 1.493 | 3   | 0.000673 | 0 | 0.0000139 | 0         | 0.000264 | 0   | 0.00101   | 0 | 0.01138 | 0         | 0 | 0   | 0        | 0.43 | 0   | 0        | 0 | 0   | 0         | 0 | 0   | 0    | 0   | 0    | 0   | 0     | 0   |
| 15D01923                 | 3.4 %    | 295.5 | 0   | 0.018    | 35 | 0.1869 | 0        | 1.493 | 3   | 0.000673 | 0 | 0.0000139 | 0         | 0.000264 | 0   | 0.00101   | 0 | 0.01138 | 0         | 0 | 0   | 0        | 0.43 | 0   | 0        | 0 | 0   | 0         | 0 | 0   | 0    | 0   | 0    | 0   | 0     | 0   |
| 15D01925                 | 3.6 %    | 295.5 | 0   | 0.018    | 35 | 0.1869 | 0        | 1.493 | 3   | 0.000673 | 0 | 0.0000139 | 0         | 0.000264 | 0   | 0.00101   | 0 | 0.01138 | 0         | 0 | 0   | 0        | 0.43 | 0   | 0        | 0 | 0   | 0         | 0 | 0   | 0    | 0   | 0    | 0   | 0     | 0   |
| 15D01926                 | 3.8 %    | 295.5 | 0   | 0.018    | 35 | 0.1869 | 0        | 1.493 | 3   | 0.000673 | 0 | 0.0000139 | 0         | 0.000264 | 0   | 0.00101   | 0 | 0.01138 | 0         | 0 | 0   | 0        | 0.43 | 0   | 0        | 0 | 0   | 0         | 0 | 0   | 0    | 0   | 0    | 0   | 0     | 0   |
| 15D01927                 | 4.0 %    | 295.5 | 0   | 0.018    | 35 | 0.1869 | 0        | 1.493 | 3   | 0.000673 | 0 | 0.0000139 | 0         | 0.000264 | 0   | 0.00101   | 0 | 0.01138 | 0         | 0 | 0   | 0        | 0.43 | 0   | 0        | 0 | 0   | 0         | 0 | 0   | 0    | 0   | 0    | 0   | 0     | 0   |
| 15D01929                 | 4.3 %    | 295.5 | 0   | 0.018    | 35 | 0.1869 | 0        | 1.493 | 3   | 0.000673 | 0 | 0.0000139 | 0         | 0.000264 | 0   | 0.00101   | 0 | 0.01138 | 0         | 0 | 0   | 0        | 0.43 | 0   | 0        | 0 | 0   | 0         | 0 | 0   | 0    | 0   | 0    | 0   | 0     | 0   |
| 15D01930                 | 4.6 %    | 295.5 | 0   | 0.018    | 35 | 0.1869 | 0        | 1.493 | 3   | 0.000673 | 0 | 0.0000139 | 0         | 0.000264 | 0   | 0.00101   | 0 | 0.01138 | 0         | 0 | 0   | 0        | 0.43 | 0   | 0        | 0 | 0   | 0         | 0 | 0   | 0    | 0   | 0    | 0   | 0     | 0   |
| 15D01931                 | 4.9 %    | 295.5 | 0   | 0.018    | 35 | 0.1869 | 0        | 1.493 | 3   | 0.000673 | 0 | 0.0000139 | 0         | 0.000264 | 0   | 0.00101   | 0 | 0.01138 | 0         | 0 | 0   | 0        | 0.43 | 0   | 0        | 0 | 0   | 0         | 0 | 0   | 0    | 0   | 0    | 0   | 0     | 0   |
| 15D01933                 | 5.2 %    | 295.5 | 0   | 0.018    | 35 | 0.1869 | 0        | 1.493 | 3   | 0.000673 | 0 | 0.0000139 | 0         | 0.000264 | 0   | 0.00101   | 0 | 0.01138 | 0         | 0 | 0   | 0        | 0.43 | 0   | 0        | 0 | 0   | 0         | 0 | 0   | 0    | 0   | 0    | 0   | 0     | 0   |
| 15D01934                 | 5.5 %    | 295.5 | 0   | 0.018    | 35 | 0.1869 | 0        | 1.493 | 3   | 0.000673 | 0 | 0.0000139 | 0         | 0.000264 | 0   | 0.00101   | 0 | 0.01138 | 0         | 0 | 0   | 0        | 0.43 | 0   | 0        | 0 | 0   | 0         | 0 | 0   | 0    | 0   | 0    | 0   | 0     | 0   |
| 15D01935                 | 5.8 %    | 295.5 | 0   | 0.018    | 35 | 0.1869 | 0        | 1.493 | 3   | 0.000673 | 0 | 0.0000139 | 0         | 0.000264 | 0   | 0.00101   | 0 | 0.01138 | 0         | 0 | 0   | 0        | 0.43 | 0   | 0        | 0 | 0   | 0         | 0 | 0   | 0    | 0   | 0    | 0   | 0     | 0   |
| 15D01937                 | 6.1 %    | 295.5 | 0   | 0.018    | 35 | 0.1869 | 0        | 1.493 | 3   | 0.000673 | 0 | 0.0000139 | 0         | 0.000264 | 0   | 0.00101   | 0 | 0.01138 | 0         | 0 | 0   | 0        | 0.43 | 0   | 0        | 0 | 0   | 0         | 0 | 0   | 0    | 0   | 0    | 0   | 0     | 0   |
| 15D01938                 | 6.5 %    | 295.5 | 0   | 0.018    | 35 | 0.1869 | 0        | 1.493 | 3   | 0.000673 | 0 | 0.0000139 | 0         | 0.000264 | 0   | 0.00101   | 0 | 0.01138 | 0         | 0 | 0   | 0        | 0.43 | 0   | 0        | 0 | 0   | 0         | 0 | 0   | 0    | 0   | 0    | 0   | 0     | 0   |
| 15D01939                 | 7.0 %    | 295.5 | 0   | 0.018    | 35 | 0.1869 | 0        | 1.493 | 3   | 0.000673 | 0 | 0.0000139 | 0         | 0.000264 | 0   | 0.00101   | 0 | 0.01138 | 0         | 0 | 0   | 0        | 0.43 | 0   | 0        | 0 | 0   | 0         | 0 | 0   | 0    | 0   | 0    | 0   | 0     | 0   |
| 15D01941                 | 7.6 %    | 295.5 | 0   | 0.018    | 35 | 0.1869 | 0        | 1.493 | 3   | 0.000673 | 0 | 0.0000139 | 0         | 0.000264 | 0   | 0.00101   | 0 | 0.01138 | 0         | 0 | 0   | 0        | 0.43 | 0   | 0        | 0 | 0   | 0         | 0 | 0   | 0    | 0   | 0    | 0   | 0     | 0   |
| 15D01942                 | 8.4 %    | 295.5 | 0   | 0.018    | 35 | 0.1869 | 0        | 1.493 | 3   | 0.000673 | 0 | 0.0000139 | 0         | 0.000264 | 0   | 0.00101   | 0 | 0.01138 | 0         | 0 | 0   | 0        | 0.43 | 0   | 0        | 0 | 0   | 0         | 0 | 0   | 0    | 0   | 0    | 0   | 0     | 0   |
| 15D01943                 | 9.4 %    | 295.5 | 0   | 0.018    | 35 | 0.1869 | 0        | 1.493 | 3   | 0.000673 | 0 | 0.0000139 | 0         | 0.000264 | 0   | 0.00101   | 0 | 0.01138 | 0         | 0 | 0   | 0        | 0.43 | 0   | 0        | 0 | 0   | 0         | 0 | 0   | 0    | 0   | 0    | 0   | 0     | 0   |
| 15D01945                 | 10.5 %   | 295.5 | 0   | 0.018    | 35 | 0.1869 | 0        | 1.493 | 3   | 0.000673 | 0 | 0.0000139 | 0         | 0.000264 | 0   | 0.00101   | 0 | 0.01138 | 0         | 0 | 0   | 0        | 0.43 | 0   | 0        | 0 | 0   | 0         | 0 | 0   | 0    | 0   | 0    | 0   | 0     | 0   |
| 15D01946                 | 11.7 %   | 295.5 | 0   | 0.018    | 35 | 0.1869 | 0        | 1.493 | 3   | 0.000673 | 0 | 0.0000139 | 0         | 0.000264 | 0   | 0.00101   | 0 | 0.01138 | 0         | 0 | 0   | 0        | 0.43 | 0   | 0        | 0 | 0   | 0         | 0 | 0   | 0    | 0   | 0    | 0   | 0     | 0   |
| 15D01947                 | 13.1 %   | 295.5 | 0   | 0.018    | 35 | 0.1869 | 0        | 1.493 | 3   | 0.000673 | 0 | 0.0000139 | 0         | 0.000264 | 0   | 0.00101   | 0 | 0.01138 | 0         | 0 | 0   | 0        | 0.43 | 0   | 0        | 0 | 0   | 0         | 0 | 0   | 0    | 0   | 0    | 0   | 0     | 0   |
| 15D01949                 | 14.7 %   | 295.5 | 0   | 0.018    | 35 | 0.1869 | 0        | 1.493 | 3   | 0.000673 | 0 | 0.0000139 | 0         | 0.000264 | 0   | 0.00101   | 0 | 0.01138 | 0         | 0 | 0   | 0        | 0.43 | 0   | 0        | 0 | 0   | 0         | 0 | 0   | 0    | 0   | 0    | 0   | 0     | 0   |
| 15D01950                 | 16.5 %   | 295.5 | 0   | 0.018    | 35 | 0.1869 | 0        | 1.493 | 3   | 0.000673 | 0 | 0.0000139 | 0         | 0.000264 | 0   | 0.00101   | 0 | 0.01138 | 0         | 0 | 0   | 0        | 0.43 | 0   | 0        | 0 | 0   | 0         | 0 | 0   | 0    | 0   | 0    | 0   | 0     | 0   |
| 15D01951                 | 18.3 %   | 295.5 | 0   | 0.018    | 35 | 0.1869 | 0        | 1.493 | 3   | 0.000673 | 0 | 0.0000139 | 0         | 0.000264 | 0   | 0.00101   | 0 | 0.01138 | 0         | 0 | 0   | 0        | 0.43 | 0   | 0        | 0 | 0   | 0         | 0 | 0   | 0    | 0   | 0    | 0   | 0     | 0   |
| 15D01953                 | 20.2 %   | 295.5 | 0   | 0.018    | 35 | 0.1869 | 0        | 1.493 | 3   | 0.000673 | 0 | 0.0000139 | 0         | 0.000264 | 0   | 0.00101   | 0 | 0.01138 | 0         | 0 | 0   | 0        | 0.43 | 0   | 0        | 0 | 0   | 0         | 0 | 0   | 0    | 0   | 0    | 0   | 0     | 0   |
| 15D01954                 | 22.2 %   | 295.5 | 0   | 0.018    | 35 | 0.1869 | 0        | 1.493 | 3   | 0.000673 | 0 | 0.0000139 | 0         | 0.000264 | 0   | 0.00101   | 0 | 0.01138 | 0         | 0 | 0   | 0        | 0.43 | 0   | 0        | 0 | 0   | 0         | 0 | 0   | 0    | 0   | 0    | 0   | 0     | 0   |
| 15D01956                 | 24.5 %   | 295.5 | 0   | 0.018    | 35 | 0.1869 | 0        | 1.493 | 3   | 0.000673 | 0 | 0.0000139 | 0         | 0.000264 | 0   | 0.00101   | 0 | 0.01138 | 0         | 0 | 0   | 0        | 0.43 | 0   | 0        | 0 | 0   | 0         | 0 | 0   | 0    | 0   | 0    | 0   | 0     | 0   |



15D01904.AGE >>> 1180180-2 >>> KERGUELEN | FALLOON (14-PIL-01) PROJECT

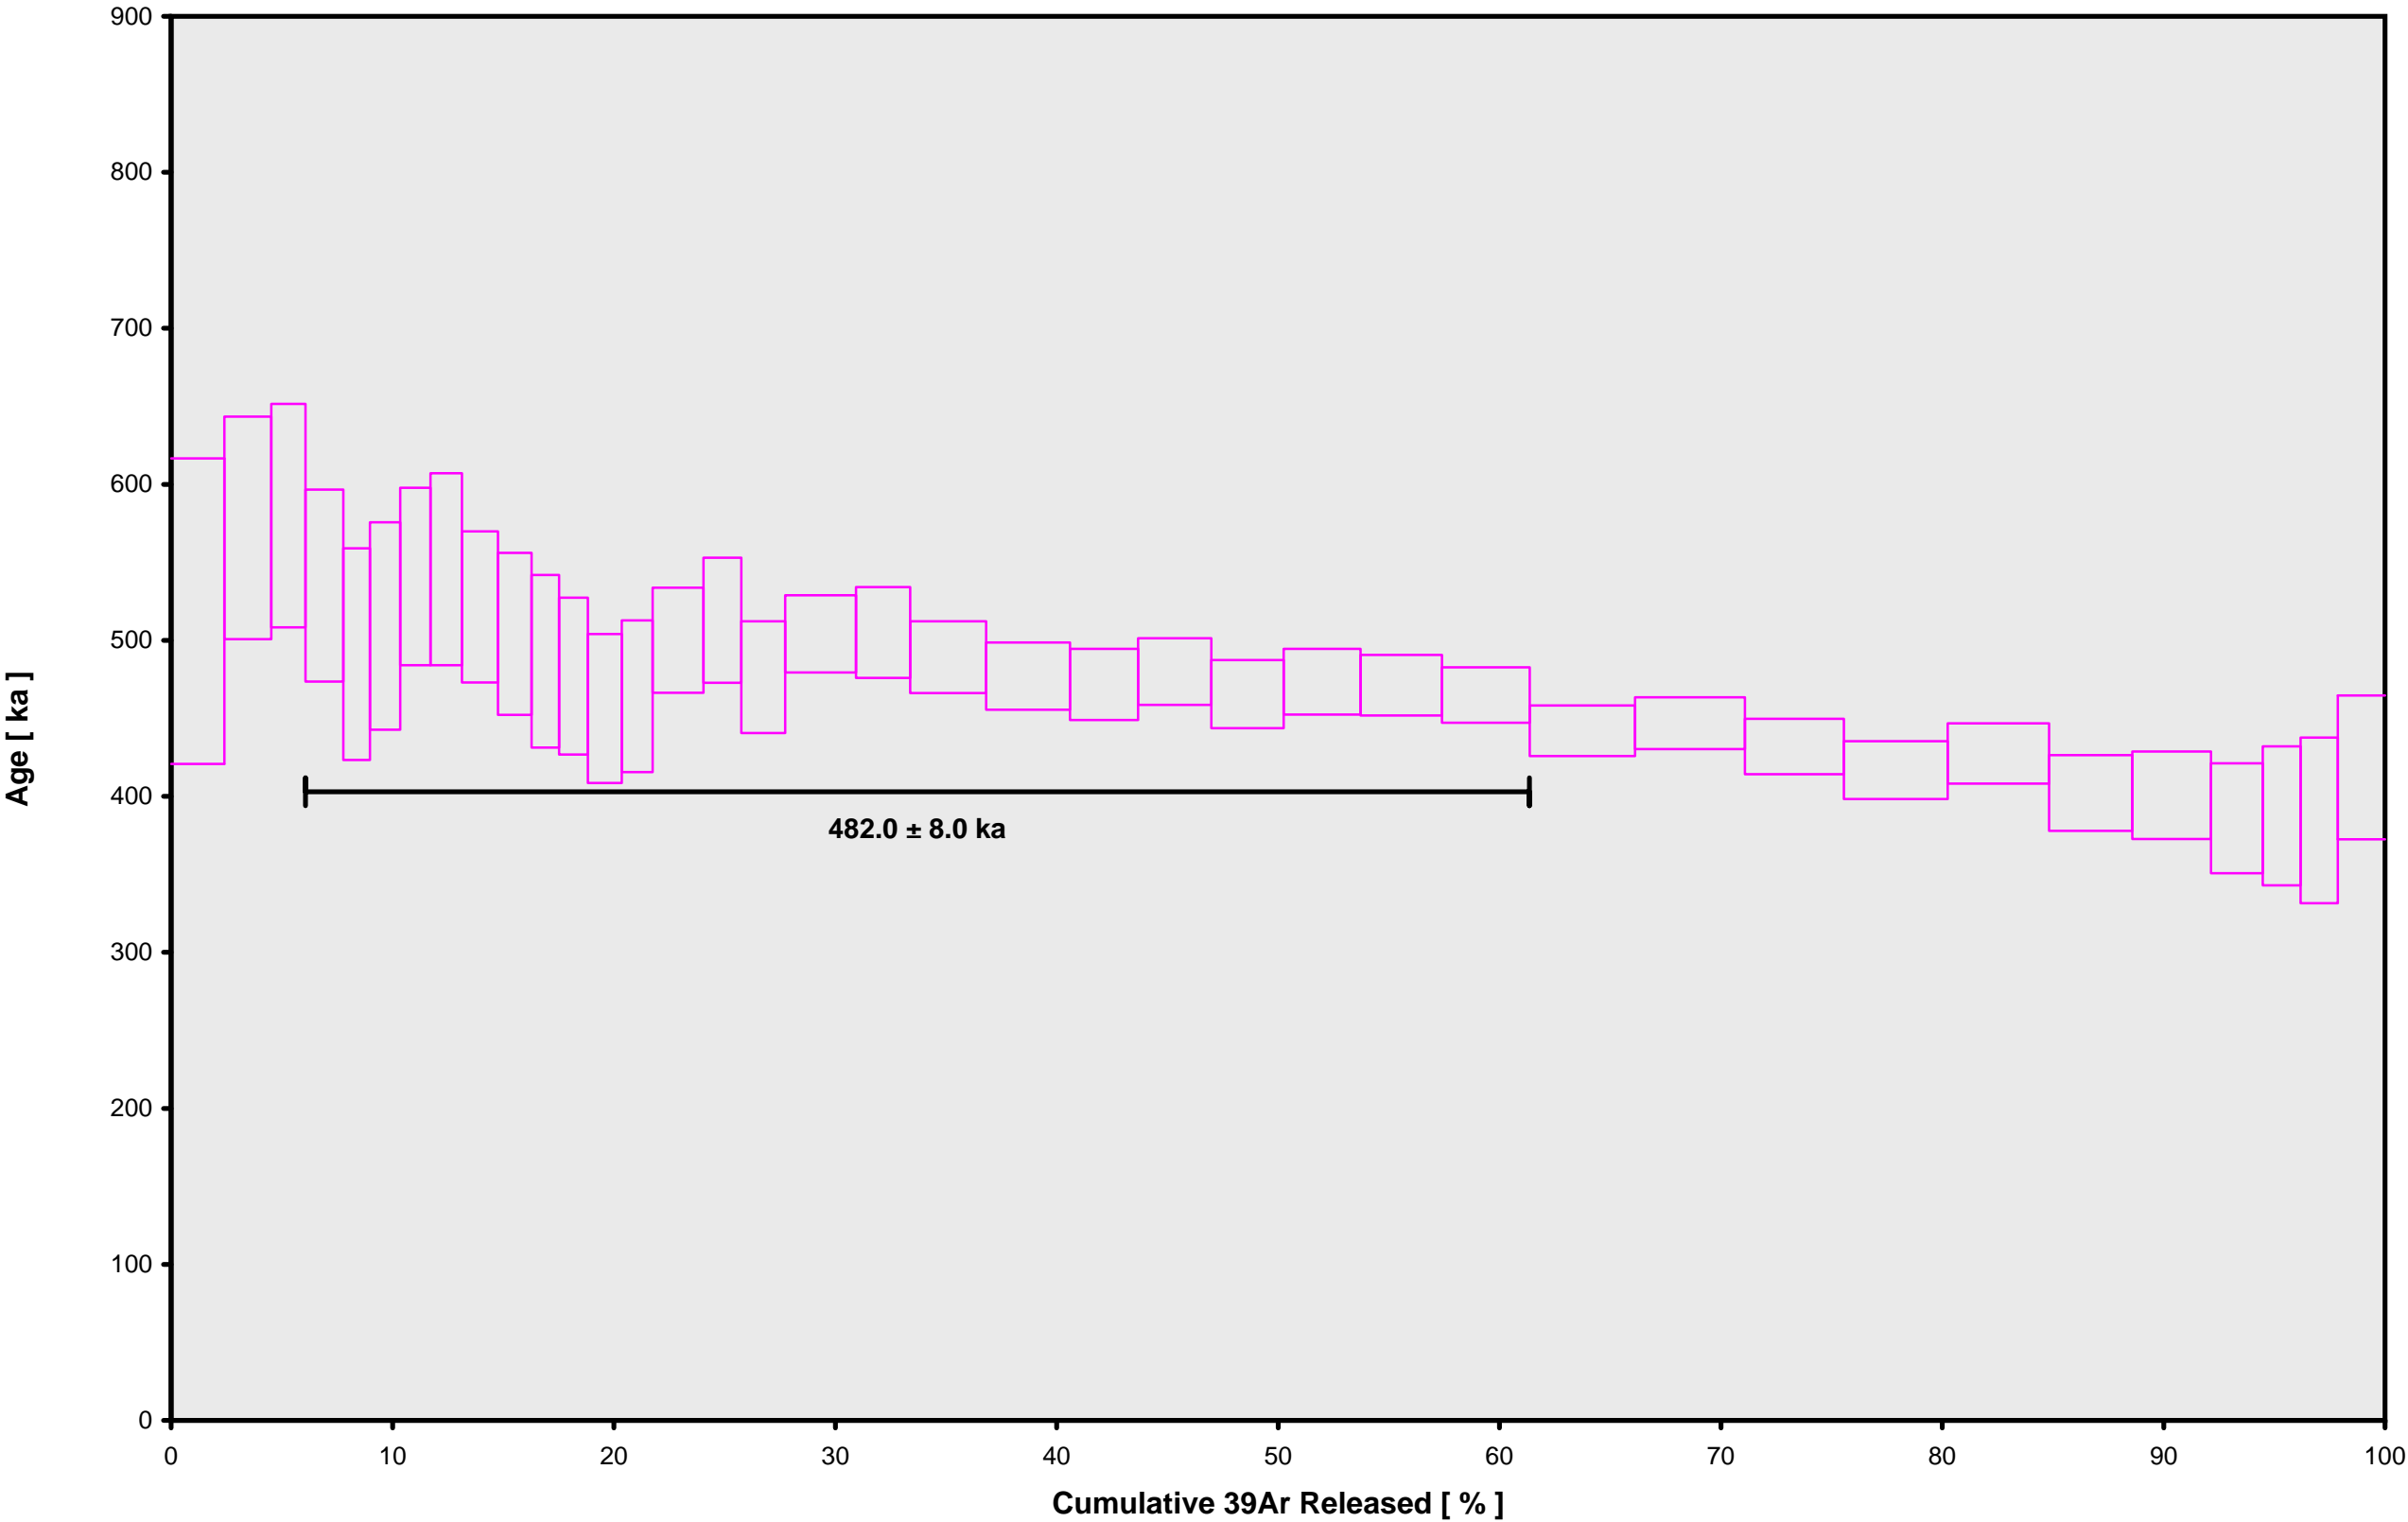

Ar-Ages in ka

WEIGHTED PLATEAU

482.0 ± 8.0

TOTAL FUSION

465.4 ± 6.0

NORMAL ISOCHRON

461.1 ± 12.0

INVERSE ISOCHRON

461.2 ± 12.0

MSWD (PROBABILITY)

1.57 (4%)

Sample Info

Groundmass

Kerguelen Plateau

Dan Miggins

IRR = 14-OSU-06 (6C11-14)

J = 0.00177095 ± 0.00000427



15D01904.AGE >>> 1180180-2 >>> KERGUELEN | FALLOON (14-PIL-01) PROJECT

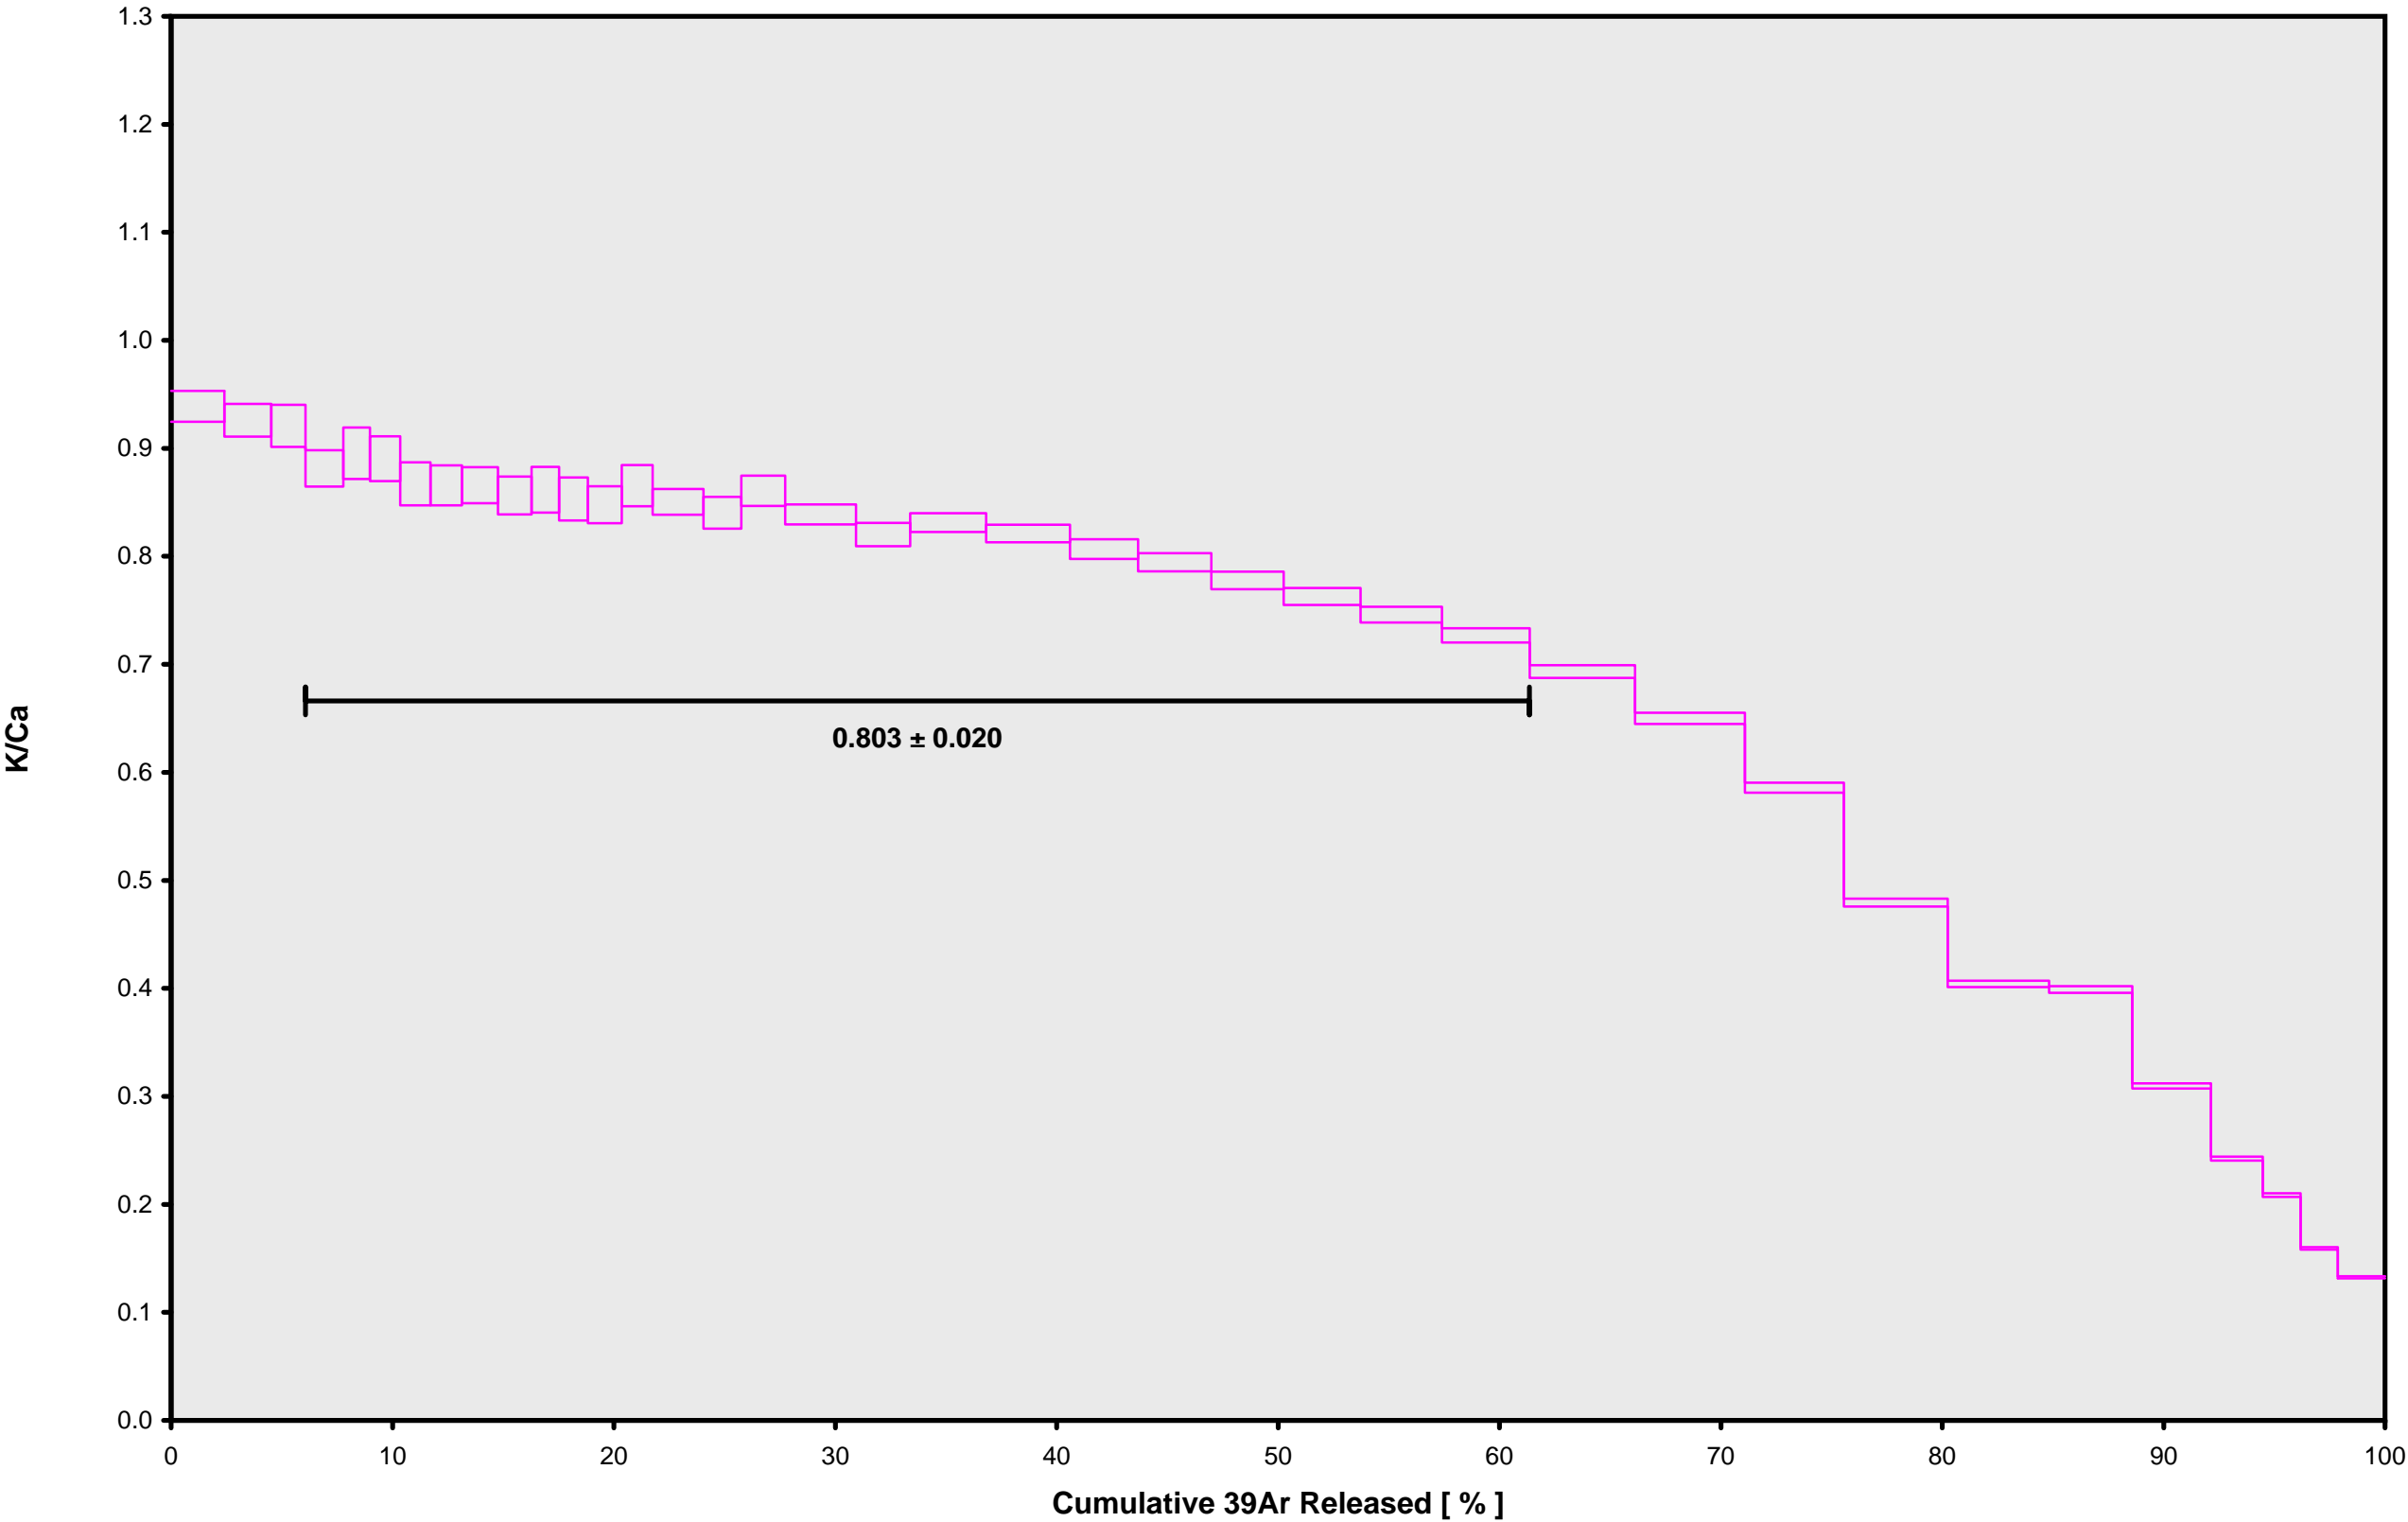



15D01904.AGE >>> 1180180-2 >>> KERGUELEN | FALLOON (14-PIL-01) PROJECT

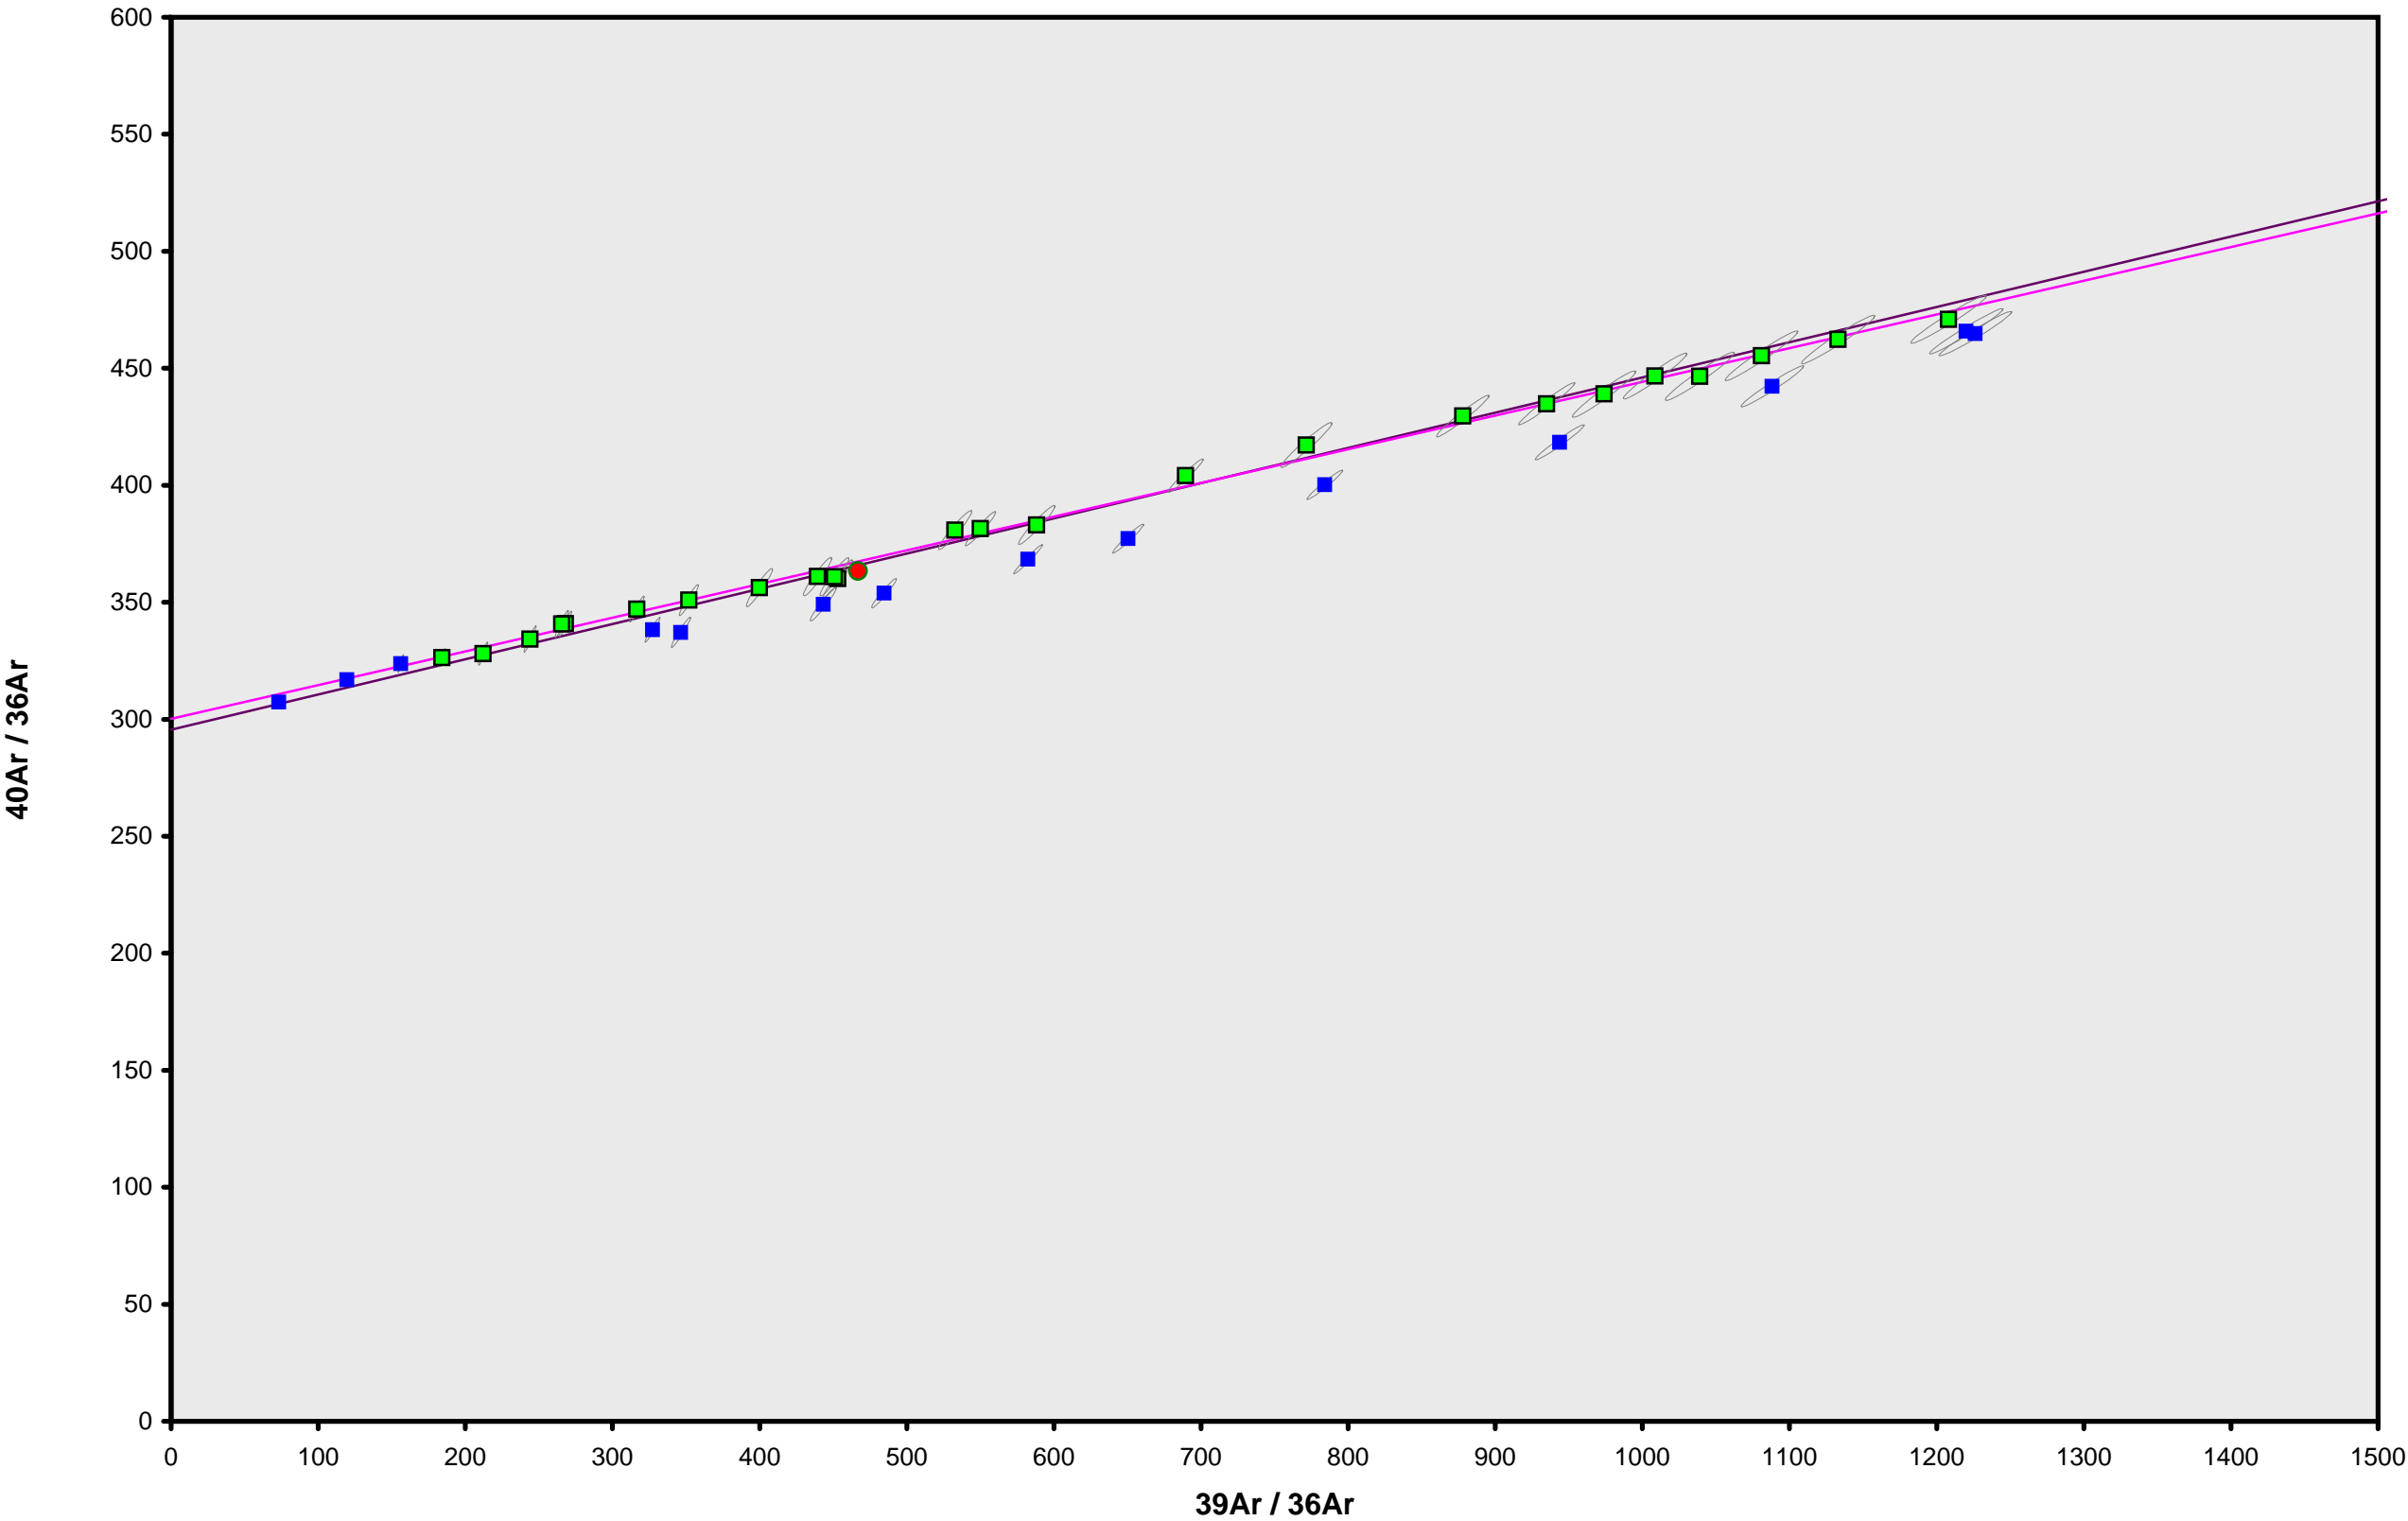

Ar-Ages in ka

WEIGHTED PLATEAU

$482.0 \pm 8.0$

TOTAL FUSION

$465.4 \pm 6.0$

NORMAL ISOCHRON

$461.1 \pm 12.0$

INVERSE ISOCHRON

$461.2 \pm 12.0$

MSWD (PROBABILITY)

0.85 (66%)

40AR/36AR INTERCEPT

$300.2 \pm 2.3$

Sample Info

Groundmass

Kerguelen Plateau

Dan Miggins

IRR = 14-OSU-06 (6C11-14)

J =  $0.00177095 \pm 0.00000427$



15D01904.AGE >>> 1180180-2 >>> KERGUELEN | FALLOON (14-PIL-01) PROJECT

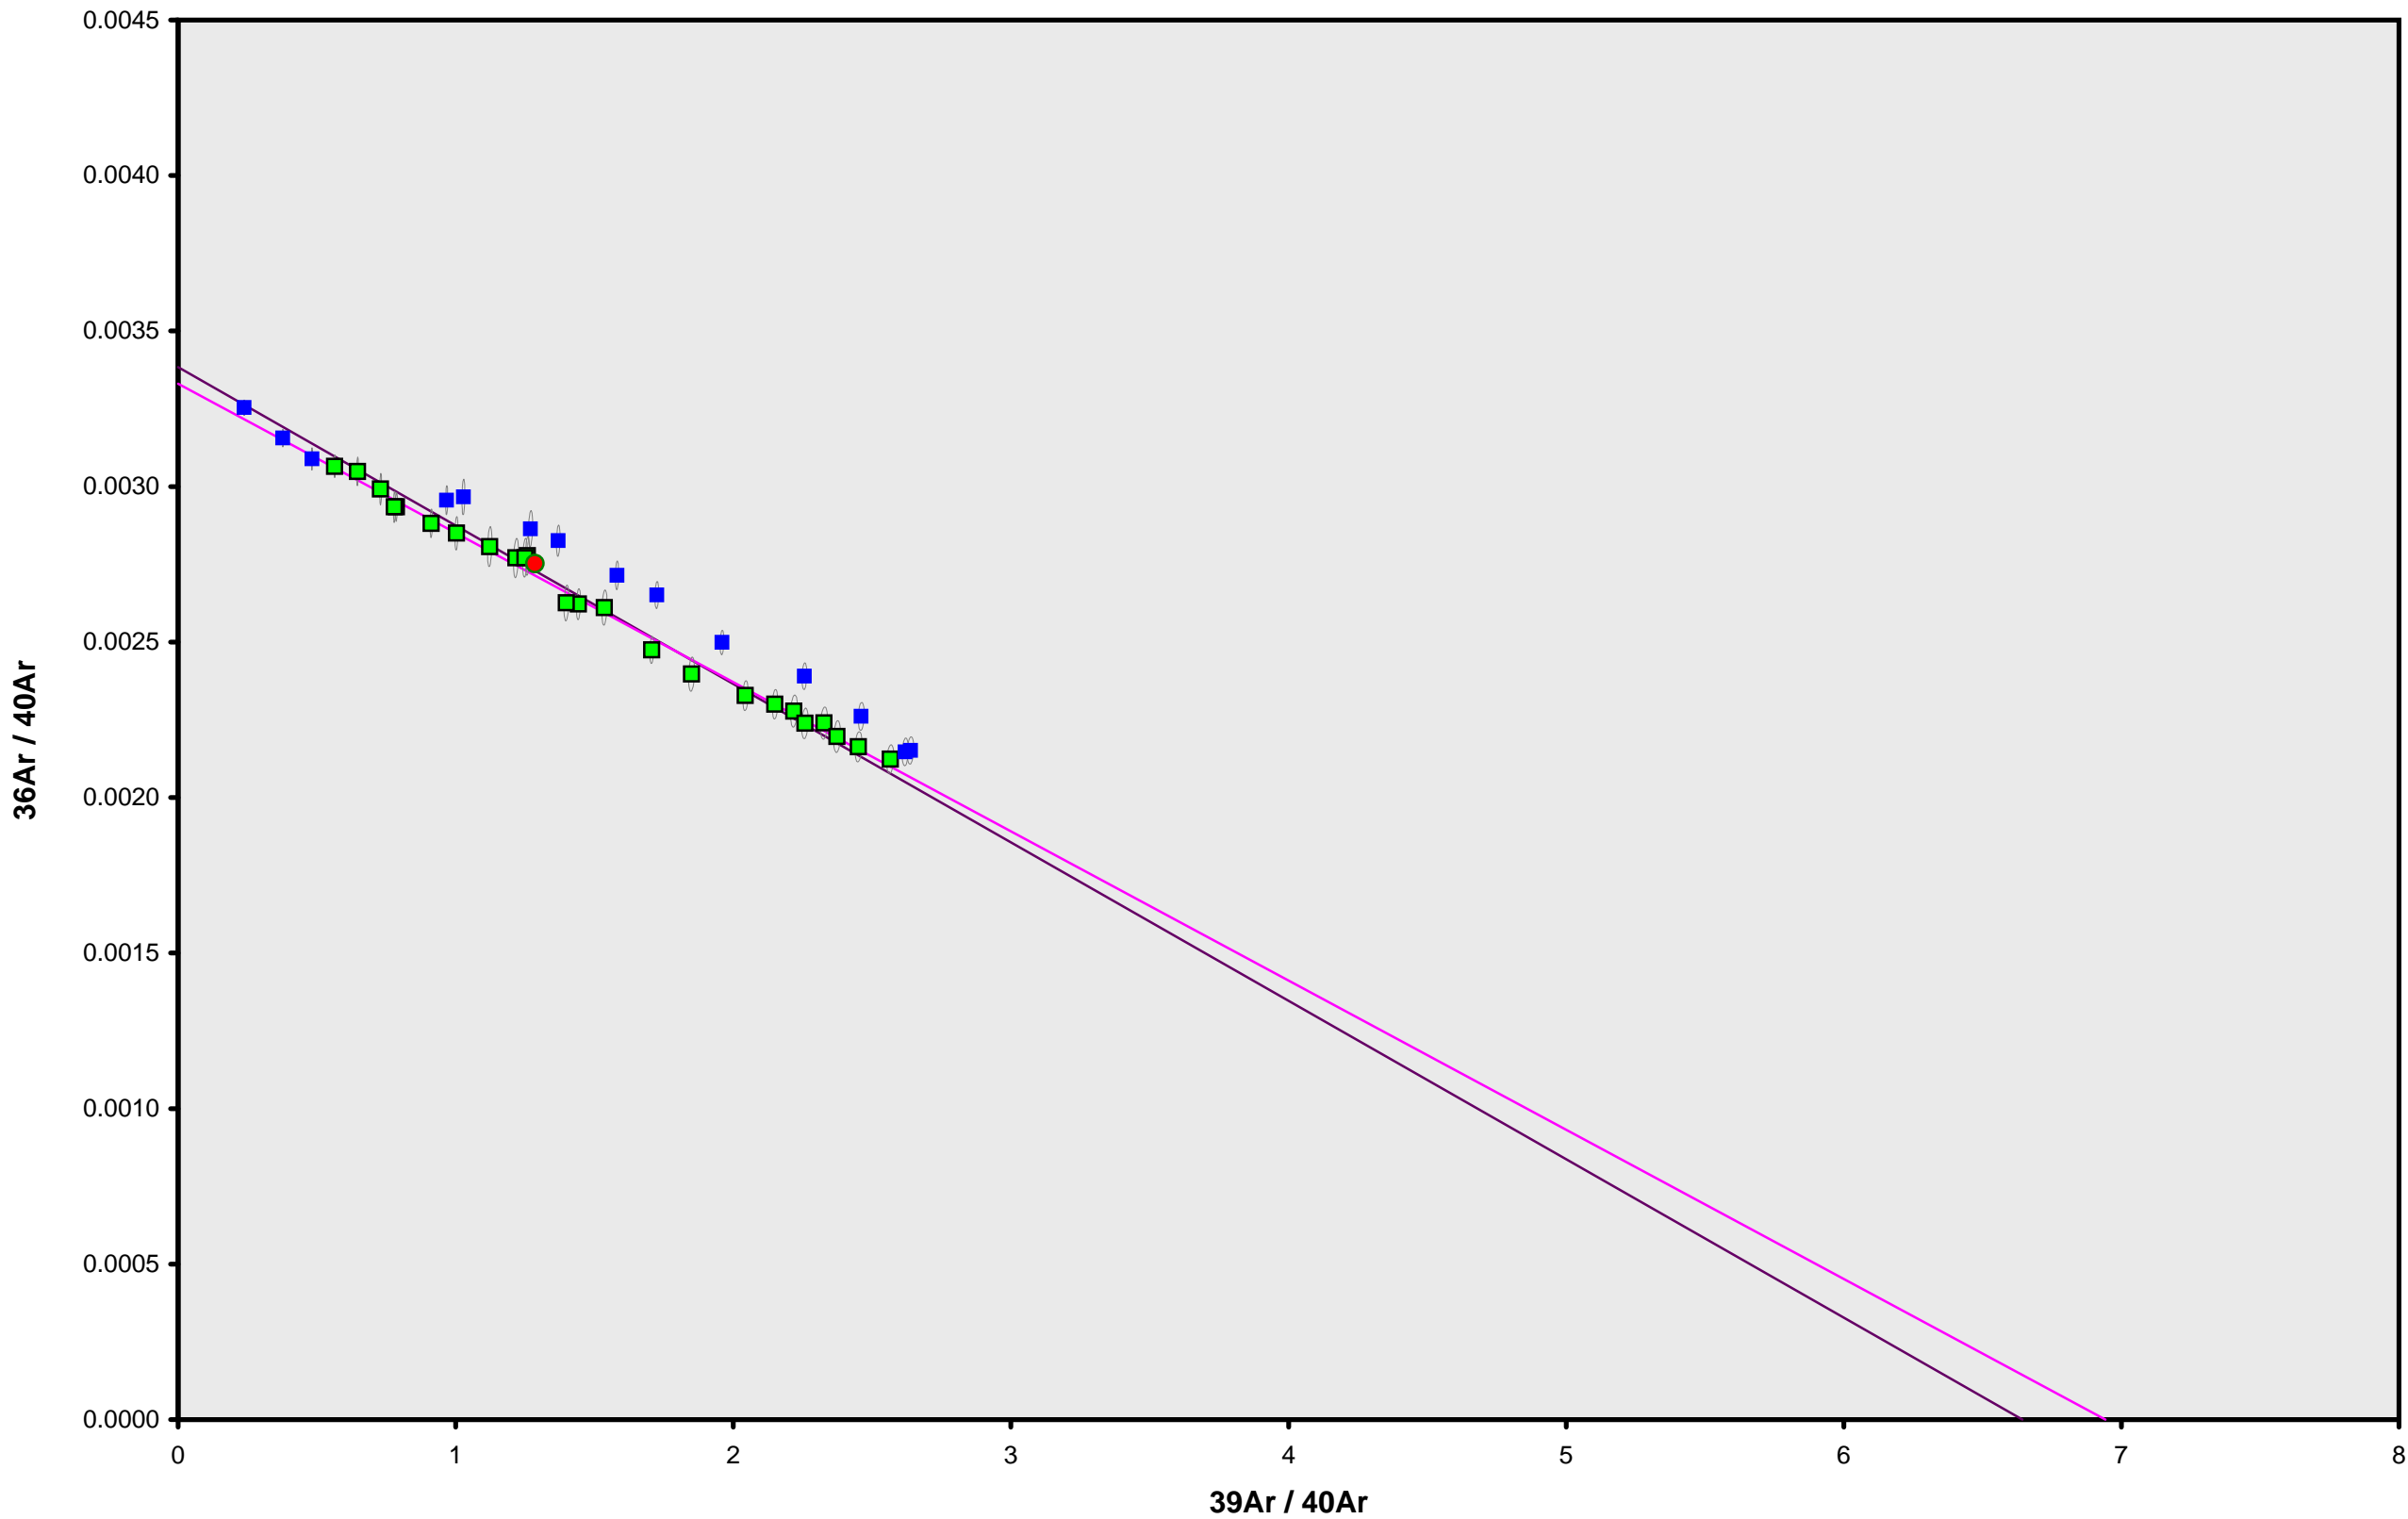

**Ar-Ages in ka**

**WEIGHTED PLATEAU**  
482.0 ± 8.0

**TOTAL FUSION**  
465.4 ± 6.0

**NORMAL ISOCHRON**  
461.1 ± 12.0

**INVERSE ISOCHRON**  
461.2 ± 12.0

**MSWD (PROBABILITY)**  
0.86 (66%)

**SPREADING FACTOR**  
28.8%

**40AR/36AR INTERCEPT**  
300.2 ± 2.3

**Sample Info**

Groundmass  
Kerguelen Plateau  
Dan Miggins

IRR = 14-OSU-06 (6C11-14)  
J = 0.00177095 ± 0.00000427



| Incremental Heating |        | 36Ar(a)<br>[fA] | 37Ar(ca)<br>[fA] | 38Ar(cl)<br>[fA] | 39Ar(k)<br>[fA] | 40Ar(r)<br>[fA] | Age ± 2σ<br>(Ma) | 40Ar(r)<br>(%) | 39Ar(k)<br>(%) | K/Ca ± 2σ     |
|---------------------|--------|-----------------|------------------|------------------|-----------------|-----------------|------------------|----------------|----------------|---------------|
| 15D01853            | 1.9 %  | 0.3973188       | 12.4968          | 0.975693         | 47.4565         | 343.3211        | 22.88 ± 0.09     | 74.51          | 3.89           | 1.633 ± 0.058 |
| 15D01854            | 2.0 %  | ✓ 0.2882016     | 13.3313          | 0.844936         | 44.5781         | 318.6650        | 22.61 ± 0.09     | 78.90          | 3.66           | 1.438 ± 0.048 |
| 15D01856            | 2.1 %  | ✓ 0.1978878     | 12.1537          | 0.699894         | 37.0988         | 264.5070        | 22.55 ± 0.09     | 81.89          | 3.04           | 1.313 ± 0.049 |
| 15D01857            | 2.2 %  | ✓ 0.1142561     | 7.5558           | 0.445527         | 23.5127         | 167.1418        | 22.48 ± 0.12     | 83.18          | 1.93           | 1.338 ± 0.082 |
| 15D01858            | 2.3 %  | ✓ 0.1219907     | 10.6715          | 0.599809         | 27.1343         | 193.4296        | 22.54 ± 0.11     | 84.28          | 2.23           | 1.093 ± 0.048 |
| 15D01860            | 2.4 %  | ✓ 0.1322589     | 14.2548          | 0.612989         | 32.1551         | 229.5627        | 22.58 ± 0.09     | 85.44          | 2.64           | 0.970 ± 0.032 |
| 15D01861            | 2.5 %  | ✓ 0.1060300     | 13.7931          | 0.509398         | 27.8384         | 197.0286        | 22.38 ± 0.10     | 86.27          | 2.28           | 0.868 ± 0.028 |
| 15D01862            | 2.6 %  | ✓ 0.0992375     | 14.8697          | 0.508693         | 27.6970         | 196.8079        | 22.47 ± 0.10     | 87.02          | 2.27           | 0.801 ± 0.025 |
| 15D01864            | 2.7 %  | ✓ 0.0711196     | 11.2764          | 0.361592         | 20.9025         | 148.5006        | 22.47 ± 0.13     | 87.59          | 1.71           | 0.797 ± 0.032 |
| 15D01865            | 2.8 %  | ✓ 0.0874467     | 17.4678          | 0.484346         | 26.7135         | 188.8622        | 22.36 ± 0.10     | 87.95          | 2.19           | 0.658 ± 0.017 |
| 15D01866            | 2.9 %  | ✓ 0.0616576     | 13.1979          | 0.409177         | 20.1191         | 141.2822        | 22.21 ± 0.13     | 88.57          | 1.65           | 0.656 ± 0.022 |
| 15D01868            | 3.0 %  | ✓ 0.0640833     | 16.0510          | 0.406047         | 21.3199         | 150.1111        | 22.27 ± 0.12     | 88.79          | 1.75           | 0.571 ± 0.017 |
| 15D01869            | 3.2 %  | ✓ 0.0773281     | 23.7799          | 0.482897         | 27.5707         | 194.3699        | 22.30 ± 0.09     | 89.47          | 2.26           | 0.499 ± 0.010 |
| 15D01870            | 3.4 %  | ✓ 0.0749275     | 27.4993          | 0.381729         | 28.7696         | 202.6965        | 22.28 ± 0.09     | 90.14          | 2.36           | 0.450 ± 0.008 |
| 15D01872            | 3.6 %  | ✓ 0.0789727     | 34.4106          | 0.442750         | 31.4229         | 220.6457        | 22.21 ± 0.09     | 90.42          | 2.58           | 0.393 ± 0.006 |
| 15D01873            | 3.8 %  | ✓ 0.0508509     | 22.4057          | 0.316497         | 20.8721         | 146.5738        | 22.21 ± 0.12     | 90.69          | 1.71           | 0.401 ± 0.009 |
| 15D01874            | 4.0 %  | ✓ 0.0568277     | 31.1684          | 0.334861         | 25.1170         | 175.5702        | 22.11 ± 0.10     | 91.26          | 2.06           | 0.347 ± 0.006 |
| 15D01876            | 4.3 %  | 0.0739505       | 53.8111          | 0.400082         | 35.8609         | 248.7340        | 21.94 ± 0.08     | 91.91          | 2.94           | 0.287 ± 0.003 |
| 15D01877            | 4.6 %  | 0.0519500       | 37.8527          | 0.348547         | 25.1258         | 174.5140        | 21.97 ± 0.10     | 91.90          | 2.06           | 0.285 ± 0.004 |
| 15D01878            | 4.9 %  | 0.0749850       | 81.4303          | 0.415041         | 42.8868         | 295.9029        | 21.82 ± 0.07     | 93.02          | 3.52           | 0.226 ± 0.002 |
| 15D01880            | 5.2 %  | 0.0665489       | 80.8760          | 0.359616         | 39.1178         | 267.4889        | 21.63 ± 0.07     | 93.14          | 3.21           | 0.208 ± 0.002 |
| 15D01881            | 5.5 %  | 0.0482431       | 63.2422          | 0.254760         | 29.0063         | 198.1519        | 21.61 ± 0.09     | 93.28          | 2.38           | 0.197 ± 0.002 |
| 15D01882            | 5.8 %  | 0.0624926       | 104.8632         | 0.337256         | 41.4070         | 279.9479        | 21.39 ± 0.07     | 93.80          | 3.40           | 0.170 ± 0.001 |
| 15D01884            | 6.1 %  | 0.0585240       | 113.4551         | 0.326480         | 40.4916         | 270.5591        | 21.14 ± 0.07     | 93.98          | 3.32           | 0.153 ± 0.001 |
| 15D01885            | 6.5 %  | 0.0468189       | 99.1728          | 0.254088         | 33.3479         | 220.0776        | 20.88 ± 0.08     | 94.07          | 2.74           | 0.145 ± 0.001 |
| 15D01886            | 7.0 %  | 0.0470120       | 119.5953         | 0.234197         | 36.0958         | 237.2200        | 20.79 ± 0.07     | 94.45          | 2.96           | 0.130 ± 0.001 |
| 15D01888            | 7.6 %  | 0.0523912       | 157.2168         | 0.276994         | 42.7855         | 278.4527        | 20.59 ± 0.07     | 94.72          | 3.51           | 0.117 ± 0.001 |
| 15D01889            | 8.4 %  | 0.0605513       | 206.9285         | 0.282001         | 50.7810         | 325.1432        | 20.26 ± 0.06     | 94.77          | 4.17           | 0.106 ± 0.001 |
| 15D01890            | 9.4 %  | 0.0639581       | 258.6648         | 0.377272         | 56.2163         | 357.7510        | 20.14 ± 0.06     | 94.97          | 4.61           | 0.093 ± 0.001 |
| 15D01892            | 10.5 % | 0.0645097       | 287.8211         | 0.408310         | 55.7765         | 347.7203        | 19.73 ± 0.06     | 94.79          | 4.58           | 0.083 ± 0.001 |
| 15D01893            | 11.7 % | 0.0583588       | 278.5866         | 0.319597         | 47.9706         | 296.1618        | 19.54 ± 0.06     | 94.48          | 3.94           | 0.074 ± 0.001 |
| 15D01894            | 13.1 % | 0.0515115       | 272.0221         | 0.303092         | 42.7521         | 257.7079        | 19.08 ± 0.07     | 94.41          | 3.51           | 0.068 ± 0.000 |
| 15D01896            | 14.7 % | 0.0475017       | 246.4882         | 0.308583         | 35.8259         | 209.4827        | 18.51 ± 0.07     | 93.70          | 2.94           | 0.062 ± 0.000 |
| 15D01897            | 16.5 % | 0.0436479       | 200.7592         | 0.222424         | 26.9452         | 150.5190        | 17.69 ± 0.09     | 92.09          | 2.21           | 0.058 ± 0.000 |
| 15D01898            | 18.3 % | 0.0397150       | 165.5275         | 0.150672         | 18.9798         | 100.4409        | 16.76 ± 0.12     | 89.52          | 1.56           | 0.049 ± 0.000 |
| 15D01900            | 20.2 % | 0.0396244       | 168.1492         | 0.136786         | 13.3606         | 64.8476         | 15.38 ± 0.16     | 84.69          | 1.10           | 0.034 ± 0.000 |
| 15D01901            | 22.2 % | 0.0408632       | 195.5229         | 0.028002         | 8.6382          | 40.6890         | 14.93 ± 0.26     | 77.10          | 0.71           | 0.019 ± 0.000 |
| 15D01903            | 24.5 % | 0.0417607       | 225.5422         | 0.000000         | 5.1899          | 25.0566         | 15.30 ± 0.45     | 66.99          | 0.43           | 0.010 ± 0.000 |

Σ 3.2153139 3713.9117 14.560633 1218.8397 8125.6450

| Information on Analysis                                                                                                                                                                                                                                                   | Results                   | 40(r)/39(k) ± 2σ             | Age ± 2σ<br>(Ma)                                      | MSWD           | 39Ar(k)<br>(%,n)                           | K/Ca ± 2σ     |
|---------------------------------------------------------------------------------------------------------------------------------------------------------------------------------------------------------------------------------------------------------------------------|---------------------------|------------------------------|-------------------------------------------------------|----------------|--------------------------------------------|---------------|
| Sample = 203-1<br>Material = Groundmass<br>Location = Kerguelen Plateau<br>Analyst = Dan Miggins<br>Project = KERGUELEN   FALLOON (14-<br>Mass Discrimination Law = LIN<br>Irradiation = 14-OSU-06 (6C12-14)<br>J = 0.00175976 ± 0.00000421<br>FCT-NM = 28.201 ± 0.023 Ma | Age Plateau<br>Error Mean | 7.07772 ± 0.02529<br>± 0.36% | 22.38 ± 0.13<br>± 0.59%                               | 9.76<br>0%     | 36.33<br>16                                | 0.447 ± 0.078 |
|                                                                                                                                                                                                                                                                           |                           |                              | Full External Error ± 0.52<br>Analytical Error ± 0.08 | 1.73<br>3.1248 | 2σ Confidence Limit<br>Error Magnification |               |
|                                                                                                                                                                                                                                                                           | Total Fusion Age          | 6.66671 ± 0.00455<br>± 0.07% | 21.09 ± 0.10<br>± 0.48%                               |                | 38                                         | 0.141 ± 0.000 |
|                                                                                                                                                                                                                                                                           |                           |                              | Full External Error ± 0.49<br>Analytical Error ± 0.01 |                |                                            |               |



| Normal Isochron |        | 39(k)/36(a) ± 2σ |                | 40(a+r)/36(a) ± 2σ | r.i.   |
|-----------------|--------|------------------|----------------|--------------------|--------|
| 15D01853        | 1.9 %  |                  | 119.44 ± 1.25  | 1159.59 ± 11.87    | 0.9774 |
| 15D01854        | 2.0 %  | ✓                | 154.68 ± 1.91  | 1401.20 ± 17.05    | 0.9826 |
| 15D01856        | 2.1 %  | ✓                | 187.47 ± 2.64  | 1632.15 ± 22.67    | 0.9834 |
| 15D01857        | 2.2 %  | ✓                | 205.79 ± 3.93  | 1758.37 ± 33.09    | 0.9819 |
| 15D01858        | 2.3 %  | ✓                | 222.43 ± 4.21  | 1881.11 ± 35.20    | 0.9861 |
| 15D01860        | 2.4 %  | ✓                | 243.12 ± 4.07  | 2031.21 ± 33.56    | 0.9849 |
| 15D01861        | 2.5 %  | ✓                | 262.55 ± 5.49  | 2153.73 ± 44.59    | 0.9881 |
| 15D01862        | 2.6 %  | ✓                | 279.10 ± 5.80  | 2278.70 ± 46.80    | 0.9870 |
| 15D01864        | 2.7 %  | ✓                | 293.91 ± 8.32  | 2383.54 ± 66.93    | 0.9897 |
| 15D01865        | 2.8 %  | ✓                | 305.48 ± 6.92  | 2455.24 ± 55.20    | 0.9900 |
| 15D01866        | 2.9 %  | ✓                | 326.30 ± 10.16 | 2586.90 ± 79.96    | 0.9908 |
| 15D01868        | 3.0 %  | ✓                | 332.69 ± 9.66  | 2637.94 ± 76.03    | 0.9907 |
| 15D01869        | 3.2 %  | ✓                | 356.54 ± 8.47  | 2809.07 ± 66.26    | 0.9914 |
| 15D01870        | 3.4 %  | ✓                | 383.97 ± 10.15 | 3000.74 ± 78.93    | 0.9934 |
| 15D01872        | 3.6 %  | ✓                | 397.90 ± 9.95  | 3089.45 ± 76.85    | 0.9934 |
| 15D01873        | 3.8 %  | ✓                | 410.46 ± 13.96 | 3177.92 ± 107.46   | 0.9928 |
| 15D01874        | 4.0 %  | ✓                | 441.99 ± 14.40 | 3385.02 ± 109.79   | 0.9946 |
| 15D01876        | 4.3 %  |                  | 484.93 ± 13.63 | 3659.02 ± 102.51   | 0.9957 |
| 15D01877        | 4.6 %  |                  | 483.65 ± 16.53 | 3654.77 ± 124.45   | 0.9951 |
| 15D01878        | 4.9 %  |                  | 571.94 ± 14.73 | 4241.66 ± 108.87   | 0.9957 |
| 15D01880        | 5.2 %  |                  | 587.80 ± 17.81 | 4314.93 ± 130.36   | 0.9967 |
| 15D01881        | 5.5 %  |                  | 601.25 ± 21.92 | 4402.86 ± 160.05   | 0.9964 |
| 15D01882        | 5.8 %  |                  | 662.59 ± 21.37 | 4775.20 ± 153.69   | 0.9973 |
| 15D01884        | 6.1 %  |                  | 691.88 ± 23.62 | 4918.54 ± 167.55   | 0.9973 |
| 15D01885        | 6.5 %  |                  | 712.27 ± 27.66 | 4996.11 ± 193.62   | 0.9974 |
| 15D01886        | 7.0 %  |                  | 767.80 ± 29.62 | 5341.45 ± 205.68   | 0.9977 |
| 15D01888        | 7.6 %  |                  | 816.66 ± 32.56 | 5610.38 ± 223.33   | 0.9982 |
| 15D01889        | 8.4 %  |                  | 838.64 ± 31.21 | 5665.21 ± 210.55   | 0.9984 |
| 15D01890        | 9.4 %  |                  | 878.96 ± 33.47 | 5889.02 ± 223.95   | 0.9985 |
| 15D01892        | 10.5 % |                  | 864.62 ± 31.30 | 5685.70 ± 205.54   | 0.9984 |
| 15D01893        | 11.7 % |                  | 821.99 ± 30.60 | 5370.34 ± 199.58   | 0.9981 |
| 15D01894        | 13.1 % |                  | 829.95 ± 36.17 | 5298.42 ± 230.61   | 0.9985 |
| 15D01896        | 14.7 % |                  | 754.20 ± 33.75 | 4705.50 ± 210.27   | 0.9982 |
| 15D01897        | 16.5 % |                  | 617.33 ± 29.20 | 3743.98 ± 176.82   | 0.9976 |
| 15D01898        | 18.3 % |                  | 477.90 ± 22.52 | 2824.54 ± 132.70   | 0.9954 |
| 15D01900        | 20.2 % |                  | 337.18 ± 16.05 | 1932.06 ± 91.49    | 0.9915 |
| 15D01901        | 22.2 % |                  | 211.39 ± 10.38 | 1291.24 ± 62.69    | 0.9821 |
| 15D01903        | 24.5 % |                  | 124.28 ± 6.51  | 895.51 ± 45.35     | 0.9566 |

| Results                        | 40(a)/36(a) ± 2σ                                                    | 40(r)/39(k) ± 2σ          | Age ± 2σ (Ma)                                          | MSWD                                    |
|--------------------------------|---------------------------------------------------------------------|---------------------------|--------------------------------------------------------|-----------------------------------------|
| Normal Isochron<br>Error Chron | 332.24 ± 10.37 ± 3.12%                                              | 6.94161 ± 0.04007 ± 0.58% | 21.96 ± 0.16 ± 0.74%                                   | 2.16<br>1%                              |
|                                |                                                                     |                           | Full External Error ± 0.52<br>Analytical Error ± 0.13  |                                         |
| Statistics                     | 2σ Confidence Limit<br>Error Magnification<br>Number of Data Points | 1.76<br>1.4690<br>16      | Convergence<br>Number of Iterations<br>Calculated Line | 0.000067967287<br>79<br>Weighted York-2 |



| Inverse Isochron |        | 39(k)/40(a+r) ± 2σ |                       | 36(a)/40(a+r) ± 2σ      | r.i.   |
|------------------|--------|--------------------|-----------------------|-------------------------|--------|
| 15D01853         | 1.9 %  |                    | 0.1030031 ± 0.0002274 | 0.00086237 ± 0.00000883 | 0.0102 |
| 15D01854         | 2.0 %  | ✓                  | 0.1103886 ± 0.0002532 | 0.00071367 ± 0.00000869 | 0.0107 |
| 15D01856         | 2.1 %  | ✓                  | 0.1148631 ± 0.0002940 | 0.00061269 ± 0.00000851 | 0.0126 |
| 15D01857         | 2.2 %  | ✓                  | 0.1170341 ± 0.0004236 | 0.00056871 ± 0.00001070 | 0.0156 |
| 15D01858         | 2.3 %  | ✓                  | 0.1182437 ± 0.0003723 | 0.00053160 ± 0.00000995 | 0.0138 |
| 15D01860         | 2.4 %  | ✓                  | 0.1196934 ± 0.0003474 | 0.00049232 ± 0.00000813 | 0.0132 |
| 15D01861         | 2.5 %  | ✓                  | 0.1219056 ± 0.0003926 | 0.00046431 ± 0.00000961 | 0.0129 |
| 15D01862         | 2.6 %  | ✓                  | 0.1224813 ± 0.0004095 | 0.00043885 ± 0.00000901 | 0.0123 |
| 15D01864         | 2.7 %  | ✓                  | 0.1233068 ± 0.0005001 | 0.00041954 ± 0.00001178 | 0.0136 |
| 15D01865         | 2.8 %  | ✓                  | 0.1244207 ± 0.0003971 | 0.00040729 ± 0.00000916 | 0.0134 |
| 15D01866         | 2.9 %  | ✓                  | 0.1261369 ± 0.0005319 | 0.00038656 ± 0.00001195 | 0.0127 |
| 15D01868         | 3.0 %  | ✓                  | 0.1261178 ± 0.0004989 | 0.00037908 ± 0.00001093 | 0.0134 |
| 15D01869         | 3.2 %  | ✓                  | 0.1269249 ± 0.0003944 | 0.00035599 ± 0.00000840 | 0.0130 |
| 15D01870         | 3.4 %  | ✓                  | 0.1279572 ± 0.0003890 | 0.00033325 ± 0.00000877 | 0.0106 |
| 15D01872         | 3.6 %  | ✓                  | 0.1287917 ± 0.0003689 | 0.00032368 ± 0.00000805 | 0.0104 |
| 15D01873         | 3.8 %  | ✓                  | 0.1291588 ± 0.0005274 | 0.00031467 ± 0.00001064 | 0.0119 |
| 15D01874         | 4.0 %  | ✓                  | 0.1305713 ± 0.0004403 | 0.00029542 ± 0.00000958 | 0.0108 |
| 15D01876         | 4.3 %  |                    | 0.1325302 ± 0.0003458 | 0.00027330 ± 0.00000766 | 0.0083 |
| 15D01877         | 4.6 %  |                    | 0.1323349 ± 0.0004459 | 0.00027361 ± 0.00000932 | 0.0102 |
| 15D01878         | 4.9 %  |                    | 0.1348384 ± 0.0003226 | 0.00023576 ± 0.00000605 | 0.0076 |
| 15D01880         | 5.2 %  |                    | 0.1362256 ± 0.0003335 | 0.00023175 ± 0.00000700 | 0.0073 |
| 15D01881         | 5.5 %  |                    | 0.1365595 ± 0.0004246 | 0.00022712 ± 0.00000826 | 0.0087 |
| 15D01882         | 5.8 %  |                    | 0.1387566 ± 0.0003291 | 0.00020942 ± 0.00000674 | 0.0067 |
| 15D01884         | 6.1 %  |                    | 0.1406676 ± 0.0003500 | 0.00020331 ± 0.00000693 | 0.0067 |
| 15D01885         | 6.5 %  |                    | 0.1425658 ± 0.0003981 | 0.00020016 ± 0.00000776 | 0.0076 |
| 15D01886         | 7.0 %  |                    | 0.1437439 ± 0.0003768 | 0.00018722 ± 0.00000721 | 0.0072 |
| 15D01888         | 7.6 %  |                    | 0.1455615 ± 0.0003487 | 0.00017824 ± 0.00000710 | 0.0060 |
| 15D01889         | 8.4 %  |                    | 0.1480341 ± 0.0003151 | 0.00017652 ± 0.00000656 | 0.0052 |
| 15D01890         | 9.4 %  |                    | 0.1492532 ± 0.0003103 | 0.00016981 ± 0.00000646 | 0.0042 |
| 15D01892         | 10.5 % |                    | 0.1520695 ± 0.0003099 | 0.00017588 ± 0.00000636 | 0.0049 |
| 15D01893         | 11.7 % |                    | 0.1530618 ± 0.0003529 | 0.00018621 ± 0.00000692 | 0.0056 |
| 15D01894         | 13.1 % |                    | 0.1566415 ± 0.0003738 | 0.00018874 ± 0.00000821 | 0.0057 |
| 15D01896         | 14.7 % |                    | 0.1602807 ± 0.0004259 | 0.00021252 ± 0.00000950 | 0.0074 |
| 15D01897         | 16.5 % |                    | 0.1648862 ± 0.0005421 | 0.00026710 ± 0.00001261 | 0.0104 |
| 15D01898         | 18.3 % |                    | 0.1691960 ± 0.0007609 | 0.00035404 ± 0.00001663 | 0.0164 |
| 15D01900         | 20.2 % |                    | 0.1745196 ± 0.0010788 | 0.00051758 ± 0.00002451 | 0.0244 |
| 15D01901         | 22.2 % |                    | 0.1637132 ± 0.0015155 | 0.00077445 ± 0.00003760 | 0.0328 |
| 15D01903         | 24.5 % |                    | 0.1387802 ± 0.0021184 | 0.00111669 ± 0.00005656 | 0.0373 |

| Results                         | 40(a)/36(a) ± 2σ       |        | 40(r)/39(k) ± 2σ          | Age ± 2σ (Ma)                                         | MSWD            |
|---------------------------------|------------------------|--------|---------------------------|-------------------------------------------------------|-----------------|
| Inverse Isochron<br>Error Chron | 331.73 ± 10.46 ± 3.15% |        | 6.94437 ± 0.04041 ± 0.58% | 21.96 ± 0.16 ± 0.75%                                  | 2.17 1%         |
|                                 |                        |        |                           | Full External Error ± 0.52<br>Analytical Error ± 0.13 |                 |
| Statistics                      | 2σ Confidence Limit    | 1.76   | Convergence               |                                                       | 0.0000082644    |
|                                 | Error Magnification    | 1.4725 | Number of Iterations      |                                                       | 3               |
|                                 | Number of Data Points  | 16     | Calculated Line           |                                                       | Weighted York-2 |
|                                 | Spreading Factor       | 14.0%  |                           |                                                       |                 |



| OSU Argon Geochronology Lab |        |           |       |           |       |           |       |           |       |           |       |                  |               |             |             |           |
|-----------------------------|--------|-----------|-------|-----------|-------|-----------|-------|-----------|-------|-----------|-------|------------------|---------------|-------------|-------------|-----------|
| Relative Abundances         |        | 36Ar [fA] | %1σ   | 37Ar [fA] | %1σ   | 38Ar [fA] | %1σ   | 39Ar [fA] | %1σ   | 40Ar [fA] | %1σ   | 40(r)/39(k) ± 2σ | Age ± 2σ (Ma) | 40Ar(r) (%) | 39Ar(k) (%) | K/Ca ± 2σ |
| 15D01853                    | 1.9 %  |           |       |           |       |           |       |           |       |           |       |                  |               |             |             |           |
| 15D01854                    | 2.0 %  | ✓         |       |           |       |           |       |           |       |           |       |                  |               |             |             |           |
| 15D01856                    | 2.1 %  | ✓         |       |           |       |           |       |           |       |           |       |                  |               |             |             |           |
| 15D01857                    | 2.2 %  | ✓         |       |           |       |           |       |           |       |           |       |                  |               |             |             |           |
| 15D01858                    | 2.3 %  | ✓         |       |           |       |           |       |           |       |           |       |                  |               |             |             |           |
| 15D01860                    | 2.4 %  | ✓         |       |           |       |           |       |           |       |           |       |                  |               |             |             |           |
| 15D01861                    | 2.5 %  | ✓         |       |           |       |           |       |           |       |           |       |                  |               |             |             |           |
| 15D01862                    | 2.6 %  | ✓         |       |           |       |           |       |           |       |           |       |                  |               |             |             |           |
| 15D01864                    | 2.7 %  | ✓         |       |           |       |           |       |           |       |           |       |                  |               |             |             |           |
| 15D01865                    | 2.8 %  | ✓         |       |           |       |           |       |           |       |           |       |                  |               |             |             |           |
| 15D01866                    | 2.9 %  | ✓         |       |           |       |           |       |           |       |           |       |                  |               |             |             |           |
| 15D01868                    | 3.0 %  | ✓         |       |           |       |           |       |           |       |           |       |                  |               |             |             |           |
| 15D01869                    | 3.2 %  | ✓         |       |           |       |           |       |           |       |           |       |                  |               |             |             |           |
| 15D01870                    | 3.4 %  | ✓         |       |           |       |           |       |           |       |           |       |                  |               |             |             |           |
| 15D01872                    | 3.6 %  | ✓         |       |           |       |           |       |           |       |           |       |                  |               |             |             |           |
| 15D01873                    | 3.8 %  | ✓         |       |           |       |           |       |           |       |           |       |                  |               |             |             |           |
| 15D01874                    | 4.0 %  | ✓         |       |           |       |           |       |           |       |           |       |                  |               |             |             |           |
| 15D01876                    | 4.3 %  |           |       |           |       |           |       |           |       |           |       |                  |               |             |             |           |
| 15D01877                    | 4.6 %  |           |       |           |       |           |       |           |       |           |       |                  |               |             |             |           |
| 15D01878                    | 4.9 %  |           |       |           |       |           |       |           |       |           |       |                  |               |             |             |           |
| 15D01880                    | 5.2 %  |           |       |           |       |           |       |           |       |           |       |                  |               |             |             |           |
| 15D01881                    | 5.5 %  |           |       |           |       |           |       |           |       |           |       |                  |               |             |             |           |
| 15D01882                    | 5.8 %  |           |       |           |       |           |       |           |       |           |       |                  |               |             |             |           |
| 15D01884                    | 6.1 %  |           |       |           |       |           |       |           |       |           |       |                  |               |             |             |           |
| 15D01885                    | 6.5 %  |           |       |           |       |           |       |           |       |           |       |                  |               |             |             |           |
| 15D01886                    | 7.0 %  |           |       |           |       |           |       |           |       |           |       |                  |               |             |             |           |
| 15D01888                    | 7.6 %  |           |       |           |       |           |       |           |       |           |       |                  |               |             |             |           |
| 15D01889                    | 8.4 %  |           |       |           |       |           |       |           |       |           |       |                  |               |             |             |           |
| 15D01890                    | 9.4 %  |           |       |           |       |           |       |           |       |           |       |                  |               |             |             |           |
| 15D01892                    | 10.5 % |           |       |           |       |           |       |           |       |           |       |                  |               |             |             |           |
| 15D01893                    | 11.7 % |           |       |           |       |           |       |           |       |           |       |                  |               |             |             |           |
| 15D01894                    | 13.1 % |           |       |           |       |           |       |           |       |           |       |                  |               |             |             |           |
| 15D01896                    | 14.7 % |           |       |           |       |           |       |           |       |           |       |                  |               |             |             |           |
| 15D01897                    | 16.5 % |           |       |           |       |           |       |           |       |           |       |                  |               |             |             |           |
| 15D01898                    | 18.3 % |           |       |           |       |           |       |           |       |           |       |                  |               |             |             |           |
| 15D01900                    | 20.2 % |           |       |           |       |           |       |           |       |           |       |                  |               |             |             |           |
| 15D01901                    | 22.2 % |           |       |           |       |           |       |           |       |           |       |                  |               |             |             |           |
| 15D01903                    | 24.5 % |           |       |           |       |           |       |           |       |           |       |                  |               |             |             |           |
| Σ                           |        | 4.1977755 | 0.158 | 3713.9117 | 0.081 | 29.050451 | 0.881 | 1221.3392 | 0.022 | 9077.0013 | 0.007 |                  |               |             |             |           |

| Information on Analysis and Constants Used in Calculations |                                                                 | Results          |                           |                      |        |                     |               |  |
|------------------------------------------------------------|-----------------------------------------------------------------|------------------|---------------------------|----------------------|--------|---------------------|---------------|--|
|                                                            |                                                                 | 40(a)/36(a) ± 2σ | 40(r)/39(k) ± 2σ          | Age ± 2σ (Ma)        | MSWD   | 39Ar(k) (% ,n)      | K/Ca ± 2σ     |  |
| Sample = 203-1                                             | Age Equations = Min et al. (2000)                               |                  |                           |                      |        |                     |               |  |
| Material = Groundmass                                      | Negative Intensities = Allowed                                  |                  |                           |                      |        |                     |               |  |
| Location = Kerguelen Plateau                               | Decay Constant 40K = 5.530 ± 0.048 E-10 1/a                     |                  | 7.07772 ± 0.02529 ± 0.36% | 22.38 ± 0.13 ± 0.59% | 9.76   | 36.33               | 0.447 ± 0.078 |  |
| Analyst = Dan Miggins                                      | Decay Constant 39Ar = 2.940 ± 0.016 E-07 1/h                    |                  |                           |                      | 0%     | 16                  |               |  |
| Project = KERQUELEN   FALLOON (14-PIL-01)                  | Decay Constant 37Ar = 8.230 ± 0.012 E-04 1/h                    |                  |                           |                      | 1.73   | 2σ Confidence Limit |               |  |
| Mass Discrimination Law = LIN                              | Decay Constant 36Cl = 2.257 ± 0.015 E-06 1/a                    |                  |                           |                      | 3.1248 | Error Magnification |               |  |
| Irradiation = 14-OSU-06 (6C12-14)                          | Decay Constant 40K(EC,β <sup>+</sup> ) = 0.580 ± 0.009 E-10 1/a |                  |                           |                      |        |                     |               |  |
| J = 0.00175976 ± 0.00000421                                | Decay Constant 40K(β <sup>-</sup> ) = 4.950 ± 0.043 E-10 1/a    |                  |                           |                      |        |                     |               |  |
| FCT-NM = 28.201 ± 0.023 Ma                                 | Atmospheric Ratio 40/36(a) = 295.50                             |                  |                           |                      |        |                     |               |  |
| IGSN = Undefined                                           | Atmospheric Ratio 38/36(a) = 0.1869                             |                  |                           |                      |        |                     |               |  |
| Preferred Age = Undefined                                  | Production Ratio 39/37(ca) = 0.000673                           |                  |                           |                      |        |                     |               |  |
| Classification = Undefined                                 | Production Ratio 38/37(ca) = 0.000014                           |                  |                           |                      |        |                     |               |  |
| Experiment Type = Incremental Heating                      | Production Ratio 36/37(ca) = 0.000264                           |                  |                           |                      |        |                     |               |  |
| Extraction Method = Undefined                              | Production Ratio 40/39(k) = 0.001010                            |                  |                           |                      |        |                     |               |  |
| Heating = 77 sec                                           | Production Ratio 38/39(k) = 0.011380                            |                  |                           |                      |        |                     |               |  |
| Isolation = 6.00 min                                       | Production Ratio 36/38(cl) = 262.80 ± 1.71                      |                  |                           |                      |        |                     |               |  |
| Instrument = ARGUS-VI-D                                    | Scaling Ratio K/Ca = 0.430                                      |                  |                           |                      |        |                     |               |  |
| Lithology = Undefined                                      | Abundance Ratio 40K/K = 1.1700 ± 0.0100 E-04                    |                  |                           |                      |        |                     |               |  |
| Lat-Lon = Undefined - Undefined                            | Atomic Weight K = 39.0983 ± 0.0001 g                            |                  |                           |                      |        |                     |               |  |
| Collector Calibrations = 40Ar 36Ar                         |                                                                 |                  |                           |                      |        |                     |               |  |
|                                                            |                                                                 |                  |                           |                      |        |                     |               |  |
|                                                            |                                                                 |                  |                           |                      |        |                     |               |  |
|                                                            |                                                                 |                  |                           |                      |        |                     |               |  |
|                                                            |                                                                 |                  |                           |                      |        |                     |               |  |
|                                                            |                                                                 |                  |                           |                      |        |                     |               |  |
|                                                            |                                                                 |                  |                           |                      |        |                     |               |  |
|                                                            |                                                                 |                  |                           |                      |        |                     |               |  |
|                                                            |                                                                 |                  |                           |                      |        |                     |               |  |
|                                                            |                                                                 |                  |                           |                      |        |                     |               |  |
|                                                            |                                                                 |                  |                           |                      |        |                     |               |  |
|                                                            |                                                                 |                  |                           |                      |        |                     |               |  |
|                                                            |                                                                 |                  |                           |                      |        |                     |               |  |
|                                                            |                                                                 |                  |                           |                      |        |                     |               |  |
|                                                            |                                                                 |                  |                           |                      |        |                     |               |  |
|                                                            |                                                                 |                  |                           |                      |        |                     |               |  |
|                                                            |                                                                 |                  |                           |                      |        |                     |               |  |
|                                                            |                                                                 |                  |                           |                      |        |                     |               |  |
|                                                            |                                                                 |                  |                           |                      |        |                     |               |  |
|                                                            |                                                                 |                  |                           |                      |        |                     |               |  |
|                                                            |                                                                 |                  |                           |                      |        |                     |               |  |
|                                                            |                                                                 |                  |                           |                      |        |                     |               |  |
|                                                            |                                                                 |                  |                           |                      |        |                     |               |  |
|                                                            |                                                                 |                  |                           |                      |        |                     |               |  |
|                                                            |                                                                 |                  |                           |                      |        |                     |               |  |
|                                                            |                                                                 |                  |                           |                      |        |                     |               |  |
|                                                            |                                                                 |                  |                           |                      |        |                     |               |  |
|                                                            |                                                                 |                  |                           |                      |        |                     |               |  |
|                                                            |                                                                 |                  |                           |                      |        |                     |               |  |
|                                                            |                                                                 |                  |                           |                      |        |                     |               |  |
|                                                            |                                                                 |                  |                           |                      |        |                     |               |  |
|                                                            |                                                                 |                  |                           |                      |        |                     |               |  |
|                                                            |                                                                 |                  |                           |                      |        |                     |               |  |
|                                                            |                                                                 |                  |                           |                      |        |                     |               |  |
|                                                            |                                                                 |                  |                           |                      |        |                     |               |  |
|                                                            |                                                                 |                  |                           |                      |        |                     |               |  |
|                                                            |                                                                 |                  |                           |                      |        |                     |               |  |
|                                                            |                                                                 |                  |                           |                      |        |                     |               |  |
|                                                            |                                                                 |                  |                           |                      |        |                     |               |  |
|                                                            |                                                                 |                  |                           |                      |        |                     |               |  |
|                                                            |                                                                 |                  |                           |                      |        |                     |               |  |
|                                                            |                                                                 |                  |                           |                      |        |                     |               |  |
|                                                            |                                                                 |                  |                           |                      |        |                     |               |  |
|                                                            |                                                                 |                  |                           |                      |        |                     |               |  |
|                                                            |                                                                 |                  |                           |                      |        |                     |               |  |
|                                                            |                                                                 |                  |                           |                      |        |                     |               |  |
|                                                            |                                                                 |                  |                           |                      |        |                     |               |  |
|                                                            |                                                                 |                  |                           |                      |        |                     |               |  |
|                                                            |                                                                 |                  |                           |                      |        |                     |               |  |
|                                                            |                                                                 |                  |                           |                      |        |                     |               |  |
|                                                            |                                                                 |                  |                           |                      |        |                     |               |  |
|                                                            |                                                                 |                  |                           |                      |        |                     |               |  |
|                                                            |                                                                 |                  |                           |                      |        |                     |               |  |
|                                                            |                                                                 |                  |                           |                      |        |                     |               |  |
|                                                            |                                                                 |                  |                           |                      |        |                     |               |  |
|                                                            |                                                                 |                  |                           |                      |        |                     |               |  |
|                                                            |                                                                 |                  |                           |                      |        |                     |               |  |
|                                                            |                                                                 |                  |                           |                      |        |                     |               |  |
|                                                            |                                                                 |                  |                           |                      |        |                     |               |  |
|                                                            |                                                                 |                  |                           |                      |        |                     |               |  |
|                                                            |                                                                 |                  |                           |                      |        |                     |               |  |
|                                                            |                                                                 |                  |                           |                      |        |                     |               |  |
|                                                            |                                                                 |                  |                           |                      |        |                     |               |  |
|                                                            |                                                                 |                  |                           |                      |        |                     |               |  |
|                                                            |                                                                 |                  |                           |                      |        |                     |               |  |
|                                                            |                                                                 |                  |                           |                      |        |                     |               |  |
|                                                            |                                                                 |                  |                           |                      |        |                     |               |  |
|                                                            |                                                                 |                  |                           |                      |        |                     |               |  |
|                                                            |                                                                 |                  |                           |                      |        |                     |               |  |
|                                                            |                                                                 |                  |                           |                      |        |                     |               |  |
|                                                            |                                                                 |                  |                           |                      |        |                     |               |  |
|                                                            |                                                                 |                  |                           |                      |        |                     |               |  |
|                                                            |                                                                 |                  |                           |                      |        |                     |               |  |
|                                                            |                                                                 |                  |                           |                      |        |                     |               |  |
|                                                            |                                                                 |                  |                           |                      |        |                     |               |  |
|                                                            |                                                                 |                  |                           |                      |        |                     |               |  |
|                                                            |                                                                 |                  |                           |                      |        |                     |               |  |
|                                                            |                                                                 |                  |                           |                      |        |                     |               |  |
|                                                            |                                                                 |                  |                           |                      |        |                     |               |  |
|                                                            |                                                                 |                  |                           |                      |        |                     |               |  |
|                                                            |                                                                 |                  |                           |                      |        |                     |               |  |
|                                                            |                                                                 |                  |                           |                      |        |                     |               |  |
|                                                            |                                                                 |                  |                           |                      |        |                     |               |  |
|                                                            |                                                                 |                  |                           |                      |        |                     |               |  |
|                                                            |                                                                 |                  |                           |                      |        |                     |               |  |
|                                                            |                                                                 |                  |                           |                      |        |                     |               |  |
|                                                            |                                                                 |                  |                           |                      |        |                     |               |  |
|                                                            |                                                                 |                  |                           |                      |        |                     |               |  |
|                                                            |                                                                 |                  |                           |                      |        |                     |               |  |
|                                                            |                                                                 |                  |                           |                      |        |                     |               |  |
|                                                            |                                                                 |                  |                           |                      |        |                     |               |  |
|                                                            |                                                                 |                  |                           |                      |        |                     |               |  |
|                                                            |                                                                 |                  |                           |                      |        |                     |               |  |
|                                                            |                                                                 |                  |                           |                      |        |                     |               |  |
|                                                            |                                                                 |                  |                           |                      |        |                     |               |  |
|                                                            |                                                                 |                  |                           |                      |        |                     |               |  |
|                                                            |                                                                 |                  |                           |                      |        |                     |               |  |
|                                                            |                                                                 |                  |                           |                      |        |                     |               |  |
|                                                            |                                                                 |                  |                           |                      |        |                     |               |  |
|                                                            |                                                                 |                  |                           |                      |        |                     |               |  |
|                                                            |                                                                 |                  |                           |                      |        |                     |               |  |
|                                                            |                                                                 |                  |                           |                      |        |                     |               |  |
|                                                            |                                                                 |                  |                           |                      |        |                     |               |  |
|                                                            |                                                                 |                  |                           |                      |        |                     |               |  |
|                                                            |                                                                 |                  |                           |                      |        |                     |               |  |
|                                                            |                                                                 |                  |                           |                      |        |                     |               |  |
|                                                            |                                                                 |                  |                           |                      |        |                     |               |  |
|                                                            |                                                                 |                  |                           |                      |        |                     |               |  |
|                                                            |                                                                 |                  |                           |                      |        |                     |               |  |
|                                                            |                                                                 |                  |                           |                      |        |                     |               |  |
|                                                            |                                                                 |                  |                           |                      |        |                     |               |  |
|                                                            |                                                                 |                  |                           |                      |        |                     |               |  |
| </                                                         |                                                                 |                  |                           |                      |        |                     |               |  |



| OSU Argon Geochronology Lab |        |                 |      |                 |      |                  |      |                  |       |                  |      |                 |      |                 |      |                 |      |                  |      |                  |       |                 |      |                  |      |                 |      |                 |      |                 |      |                 |      |
|-----------------------------|--------|-----------------|------|-----------------|------|------------------|------|------------------|-------|------------------|------|-----------------|------|-----------------|------|-----------------|------|------------------|------|------------------|-------|-----------------|------|------------------|------|-----------------|------|-----------------|------|-----------------|------|-----------------|------|
| Degassing Patterns          |        | 36Ar(a)<br>[fA] | %1σ  | 36Ar(c)<br>[fA] | %1σ  | 36Ar(ca)<br>[fA] | %1σ  | 36Ar(cl)<br>[fA] | %1σ   | 37Ar(ca)<br>[fA] | %1σ  | 38Ar(a)<br>[fA] | %1σ  | 38Ar(c)<br>[fA] | %1σ  | 38Ar(k)<br>[fA] | %1σ  | 38Ar(ca)<br>[fA] | %1σ  | 38Ar(cl)<br>[fA] | %1σ   | 39Ar(k)<br>[fA] | %1σ  | 39Ar(ca)<br>[fA] | %1σ  | 40Ar(r)<br>[fA] | %1σ  | 40Ar(a)<br>[fA] | %1σ  | 40Ar(c)<br>[fA] | %1σ  | 40Ar(k)<br>[fA] | %1σ  |
| 15D01853                    | 1.9 %  | 0.3973188       | 0.51 | 0.0000000       | 0.00 | 0.0032992        | 1.77 | 0.0001330        | 4.35  | 12.4968          | 1.77 | 0.0742589       | 0.51 | 0.0000000       | 0.00 | 0.540055        | 0.11 | 0.0001737        | 1.77 | 0.975693         | 4.45  | 47.4565         | 0.11 | 0.0084103        | 1.77 | 343.3211        | 0.18 | 117.40772       | 0.51 | 0.0000000       | 0.00 | 0.0479310       | 0.11 |
| 15D01854                    | 2.0 %  | ✓ 0.2882016     | 0.61 | 0.0000000       | 0.00 | 0.0035195        | 1.68 | 0.0001152        | 4.94  | 13.3313          | 1.68 | 0.0538649       | 0.61 | 0.0000000       | 0.00 | 0.507298        | 0.11 | 0.0001853        | 1.68 | 0.844936         | 5.02  | 44.5781         | 0.11 | 0.0089719        | 1.68 | 318.6650        | 0.17 | 85.16357        | 0.61 | 0.0000000       | 0.00 | 0.0450238       | 0.11 |
| 15D01856                    | 2.1 %  | ✓ 0.1978878     | 0.69 | 0.0000000       | 0.00 | 0.0032086        | 1.86 | 0.0000954        | 5.92  | 12.1537          | 1.86 | 0.0369852       | 0.69 | 0.0000000       | 0.00 | 0.422184        | 0.12 | 0.0001689        | 1.86 | 0.699894         | 5.99  | 37.0988         | 0.12 | 0.0081794        | 1.86 | 264.5070        | 0.16 | 58.47585        | 0.69 | 0.0000000       | 0.00 | 0.0374698       | 0.12 |
| 15D01857                    | 2.2 %  | ✓ 0.1142561     | 0.94 | 0.0000000       | 0.00 | 0.0019947        | 3.07 | 0.0000608        | 8.98  | 7.5558           | 3.07 | 0.0213545       | 0.94 | 0.0000000       | 0.00 | 0.267574        | 0.17 | 0.0001050        | 3.07 | 0.445527         | 9.03  | 23.5127         | 0.17 | 0.0050850        | 3.07 | 167.1418        | 0.20 | 33.76268        | 0.94 | 0.0000000       | 0.00 | 0.0237478       | 0.17 |
| 15D01858                    | 2.3 %  | ✓ 0.1219907     | 0.93 | 0.0000000       | 0.00 | 0.0028173        | 2.18 | 0.0000818        | 7.02  | 10.6715          | 2.18 | 0.0228001       | 0.93 | 0.0000000       | 0.00 | 0.308788        | 0.15 | 0.0001483        | 2.18 | 0.599809         | 7.08  | 27.1343         | 0.15 | 0.0071819        | 2.18 | 193.4296        | 0.18 | 36.04826        | 0.93 | 0.0000000       | 0.00 | 0.0274056       | 0.15 |
| 15D01860                    | 2.4 %  | ✓ 0.1322589     | 0.83 | 0.0000000       | 0.00 | 0.0037633        | 1.62 | 0.0000836        | 6.64  | 14.2548          | 1.62 | 0.0247192       | 0.83 | 0.0000000       | 0.00 | 0.365925        | 0.14 | 0.0001981        | 1.62 | 0.612989         | 6.70  | 32.1551         | 0.14 | 0.0095935        | 1.62 | 229.5627        | 0.15 | 39.08250        | 0.83 | 0.0000000       | 0.00 | 0.0324766       | 0.14 |
| 15D01861                    | 2.5 %  | ✓ 0.1060300     | 1.03 | 0.0000000       | 0.00 | 0.0036414        | 1.63 | 0.0000695        | 8.19  | 13.7931          | 1.63 | 0.0198170       | 1.03 | 0.0000000       | 0.00 | 0.316801        | 0.15 | 0.0001917        | 1.63 | 0.509398         | 8.24  | 27.8384         | 0.15 | 0.0092828        | 1.63 | 197.0286        | 0.17 | 31.33188        | 1.03 | 0.0000000       | 0.00 | 0.0281168       | 0.15 |
| 15D01862                    | 2.6 %  | ✓ 0.0992375     | 1.03 | 0.0000000       | 0.00 | 0.0039256        | 1.57 | 0.0000694        | 8.50  | 14.8697          | 1.57 | 0.0185475       | 1.03 | 0.0000000       | 0.00 | 0.315192        | 0.16 | 0.0002067        | 1.57 | 0.508693         | 8.55  | 27.6970         | 0.16 | 0.0100073        | 1.57 | 196.8079        | 0.16 | 29.32469        | 1.03 | 0.0000000       | 0.00 | 0.0279740       | 0.16 |
| 15D01864                    | 2.7 %  | ✓ 0.0711196     | 1.40 | 0.0000000       | 0.00 | 0.0029770        | 1.97 | 0.0000494        | 11.15 | 11.2764          | 1.97 | 0.0132922       | 1.40 | 0.0000000       | 0.00 | 0.237871        | 0.19 | 0.0001567        | 1.97 | 0.361592         | 11.18 | 20.9025         | 0.19 | 0.0075890        | 1.97 | 148.5006        | 0.21 | 21.01583        | 1.40 | 0.0000000       | 0.00 | 0.0211115       | 0.19 |
| 15D01865                    | 2.8 %  | ✓ 0.0874467     | 1.12 | 0.0000000       | 0.00 | 0.0046115        | 1.29 | 0.0000661        | 8.68  | 17.4678          | 1.29 | 0.0163438       | 1.12 | 0.0000000       | 0.00 | 0.303999        | 0.15 | 0.0002428        | 1.29 | 0.484346         | 8.73  | 26.7135         | 0.15 | 0.0117558        | 1.29 | 188.8622        | 0.16 | 25.84049        | 1.12 | 0.0000000       | 0.00 | 0.0269806       | 0.15 |
| 15D01866                    | 2.9 %  | ✓ 0.0616576     | 1.54 | 0.0000000       | 0.00 | 0.0034842        | 1.68 | 0.0000559        | 10.35 | 13.1979          | 1.68 | 0.0115238       | 1.54 | 0.0000000       | 0.00 | 0.228955        | 0.20 | 0.0001835        | 1.68 | 0.409177         | 10.39 | 20.1191         | 0.20 | 0.0088822        | 1.68 | 141.2822        | 0.21 | 18.21983        | 1.54 | 0.0000000       | 0.00 | 0.0203203       | 0.20 |
| 15D01868                    | 3.0 %  | ✓ 0.0640833     | 1.44 | 0.0000000       | 0.00 | 0.0042375        | 1.49 | 0.0000554        | 9.77  | 16.0510          | 1.49 | 0.0119772       | 1.44 | 0.0000000       | 0.00 | 0.242621        | 0.19 | 0.0002231        | 1.49 | 0.406047         | 9.82  | 21.3199         | 0.19 | 0.0108023        | 1.49 | 150.1111        | 0.19 | 18.93661        | 1.44 | 0.0000000       | 0.00 | 0.0215331       | 0.19 |
| 15D01869                    | 3.2 %  | ✓ 0.0773281     | 1.18 | 0.0000000       | 0.00 | 0.0062779        | 1.00 | 0.0000659        | 8.64  | 23.7799          | 1.00 | 0.0144526       | 1.18 | 0.0000000       | 0.00 | 0.313754        | 0.15 | 0.0003305        | 1.00 | 0.482897         | 8.68  | 27.5707         | 0.15 | 0.0160039        | 1.00 | 194.3699        | 0.15 | 22.85046        | 1.18 | 0.0000000       | 0.00 | 0.0278464       | 0.15 |
| 15D01870                    | 3.4 %  | ✓ 0.0749275     | 1.31 | 0.0000000       | 0.00 | 0.0072598        | 0.87 | 0.0000521        | 10.96 | 27.4993          | 0.87 | 0.0140039       | 1.31 | 0.0000000       | 0.00 | 0.327398        | 0.14 | 0.0003822        | 0.87 | 0.381729         | 11.00 | 28.7696         | 0.14 | 0.0185070        | 0.87 | 202.6965        | 0.15 | 22.14107        | 1.31 | 0.0000000       | 0.00 | 0.0290573       | 0.14 |
| 15D01872                    | 3.6 %  | ✓ 0.0789727     | 1.24 | 0.0000000       | 0.00 | 0.0090844        | 0.72 | 0.0000605        | 9.53  | 34.4106          | 0.72 | 0.0147600       | 1.24 | 0.0000000       | 0.00 | 0.357592        | 0.14 | 0.0004783        | 0.72 | 0.442750         | 9.58  | 31.4229         | 0.14 | 0.0231583        | 0.72 | 220.6457        | 0.14 | 23.33644        | 1.24 | 0.0000000       | 0.00 | 0.0317371       | 0.14 |
| 15D01873                    | 3.8 %  | ✓ 0.0508509     | 1.69 | 0.0000000       | 0.00 | 0.0059151        | 1.06 | 0.0000432        | 13.54 | 22.4057          | 1.06 | 0.0095040       | 1.69 | 0.0000000       | 0.00 | 0.237524        | 0.19 | 0.0003114        | 1.06 | 0.316497         | 13.57 | 20.8721         | 0.19 | 0.0150791        | 1.06 | 146.5738        | 0.19 | 15.02644        | 1.69 | 0.0000000       | 0.00 | 0.0210808       | 0.19 |
| 15D01874                    | 4.0 %  | ✓ 0.0568277     | 1.62 | 0.0000000       | 0.00 | 0.0082285        | 0.82 | 0.0000458        | 12.09 | 31.1684          | 0.82 | 0.0106211       | 1.62 | 0.0000000       | 0.00 | 0.285832        | 0.16 | 0.0004332        | 0.82 | 0.334861         | 12.12 | 25.1170         | 0.16 | 0.0209763        | 0.82 | 175.5702        | 0.17 | 16.79257        | 1.62 | 0.0000000       | 0.00 | 0.0253682       | 0.16 |
| 15D01876                    | 4.3 %  | 0.0739505       | 1.40 | 0.0000000       | 0.00 | 0.0142061        | 0.53 | 0.0000547        | 9.82  | 53.8111          | 0.53 | 0.0138213       | 1.40 | 0.0000000       | 0.00 | 0.408097        | 0.12 | 0.0007480        | 0.53 | 0.400082         | 9.86  | 35.8609         | 0.12 | 0.0362148        | 0.53 | 248.7340        | 0.13 | 21.85237        | 1.40 | 0.0000000       | 0.00 | 0.0362195       | 0.12 |
| 15D01877                    | 4.6 %  | 0.0519500       | 1.70 | 0.0000000       | 0.00 | 0.0099931        | 0.68 | 0.0000476        | 11.71 | 37.8527          | 0.68 | 0.0097095       | 1.70 | 0.0000000       | 0.00 | 0.285932        | 0.16 | 0.0005262        | 0.68 | 0.348547         | 11.74 | 25.1258         | 0.16 | 0.0254749        | 0.68 | 174.5140        | 0.16 | 15.35122        | 1.70 | 0.0000000       | 0.00 | 0.0253771       | 0.16 |
| 15D01878                    | 4.9 %  | 0.0749850       | 1.28 | 0.0000000       | 0.00 | 0.0214976        | 0.43 | 0.0000567        | 10.08 | 81.4303          | 0.43 | 0.0140147       | 1.28 | 0.0000000       | 0.00 | 0.488052        | 0.11 | 0.0011319        | 0.43 | 0.415041         | 10.13 | 42.8868         | 0.11 | 0.0548026        | 0.43 | 295.9029        | 0.10 | 22.15807        | 1.28 | 0.0000000       | 0.00 | 0.0433157       | 0.11 |
| 15D01880                    | 5.2 %  | 0.0665489       | 1.51 | 0.0000000       | 0.00 | 0.0213513        | 0.43 | 0.0000492        | 11.68 | 80.8760          | 0.43 | 0.0124380       | 1.51 | 0.0000000       | 0.00 | 0.445160        | 0.12 | 0.0011242        | 0.43 | 0.359616         | 11.71 | 39.1178         | 0.12 | 0.0544296        | 0.43 | 267.4889        | 0.12 | 19.66521        | 1.51 | 0.0000000       | 0.00 | 0.0395089       | 0.12 |
| 15D01881                    | 5.5 %  | 0.0482431       | 1.82 | 0.0000000       | 0.00 | 0.0166959        | 0.47 | 0.0000348        | 16.23 | 63.2422          | 0.47 | 0.0090166       | 1.82 | 0.0000000       | 0.00 | 0.330092        | 0.15 | 0.0008791        | 0.47 | 0.254760         | 16.25 | 29.0063         | 0.15 | 0.0425620        | 0.47 | 198.1519        | 0.14 | 14.25583        | 1.82 | 0.0000000       | 0.00 | 0.0292964       | 0.15 |
| 15D01882                    | 5.8 %  | 0.0624926       | 1.61 | 0.0000000       | 0.00 | 0.0276839        | 0.38 | 0.0000461        | 12.12 | 104.8632         | 0.38 | 0.0116799       | 1.61 | 0.0000000       | 0.00 | 0.471211        | 0.11 | 0.0014576        | 0.38 | 0.337256         | 12.16 | 41.4070         | 0.11 | 0.0705729        | 0.38 | 279.9479        | 0.11 | 18.46656        | 1.61 | 0.0000000       | 0.00 | 0.0418210       | 0.11 |
| 15D01884                    | 6.1 %  | 0.0585240       | 1.70 | 0.0000000       | 0.00 | 0.0299521        | 0.38 | 0.0000447        | 12.26 | 113.4551         | 0.38 | 0.0109381       | 1.70 | 0.0000000       | 0.00 | 0.460794        | 0.12 | 0.0015770        | 0.38 | 0.326480         | 12.30 | 40.4916         | 0.12 | 0.0763553        | 0.38 | 270.5591        | 0.12 | 17.29384        | 1.70 | 0.0000000       | 0.00 | 0.0408965       | 0.12 |
| 15D01885                    | 6.5 %  | 0.0468189       | 1.94 | 0.0000000       | 0.00 | 0.0261816        | 0.40 | 0.0000348        | 16.10 | 99.1728          | 0.40 | 0.0087505       | 1.94 | 0.0000000       | 0.00 | 0.379499        | 0.13 | 0.0013785        | 0.40 | 0.254088         | 16.13 | 33.3479         | 0.13 | 0.0667433        | 0.40 | 220.0776        | 0.13 | 13.83499        | 1.94 | 0.0000000       | 0.00 | 0.0336814       | 0.13 |
| 15D01886                    | 7.0 %  | 0.0470120       | 1.92 | 0.0000000       | 0.00 | 0.0315732        | 0.38 | 0.0000320        | 18.51 | 119.5953         | 0.38 | 0.0087865       | 1.92 | 0.0000000       | 0.00 | 0.410771        | 0.12 | 0.0016624        | 0.38 | 0.234197         | 18.53 | 36.0958         | 0.12 | 0.0804877        | 0.38 | 237.2200        | 0.12 | 13.89204        | 1.92 | 0.0000000       | 0.00 | 0.0364568       | 0.12 |
| 15D01888                    | 7.6 %  | 0.0523912       | 1.99 | 0.0000000       | 0.00 | 0.0415052        | 0.35 | 0.0000379        | 14.58 | 157.2168         | 0.35 | 0.0097919       | 1.99 | 0.0000000       | 0.00 | 0.486899        | 0.11 | 0.0021853        | 0.35 | 0.276994         | 14.61 | 42.7855         | 0.11 | 0.1058069        | 0.35 | 278.4527        | 0.12 | 15.48159        | 1.99 | 0.0000000       | 0.00 | 0.0432134       | 0.11 |
| 15D01889                    | 8.4 %  | 0.0605513       | 1.86 | 0.0000000       | 0.00 | 0.0546291        | 0.34 | 0.0000386        | 14.74 | 206.9285         | 0.34 | 0.0113170       | 1.86 | 0.0000000       | 0.00 | 0.577888        | 0.10 | 0.0028763        | 0.34 | 0.282001         | 14.77 | 50.7810         | 0.10 | 0.1392629        | 0.34 | 325.1432        | 0.11 | 17.89292        | 1.86 | 0.0000000       | 0.00 | 0.0512889       | 0.10 |
| 15D01890                    | 9.4 %  | 0.0639581       | 1.90 | 0.0000000       | 0.00 | 0.0682875        | 0.33 | 0.0000516        | 10.98 | 258.6648         | 0.33 | 0.0119538       | 1.90 | 0.0000000       | 0.00 | 0.639742        | 0.10 | 0.0035954        | 0.33 | 0.377272         | 11.01 | 56.2163         | 0.10 | 0.1740814        | 0.33 | 357.7510        | 0.10 | 18.89962        | 1.90 | 0.0000000       | 0.00 | 0.0567785       | 0.10 |
| 15D01892                    | 10.5 % | 0.0645097       | 1.81 | 0.0000000       | 0.00 | 0.0759848        | 0.33 | 0.0000559        | 10.65 | 287.8211         | 0.33 | 0.0120569       | 1.81 | 0.0000000       | 0.00 | 0.634737        | 0.10 | 0.0040007        | 0.33 | 0.408310         | 10.69 | 55.7765         | 0.10 | 0.1937036        | 0.33 | 347.7203        | 0.10 | 19.06261        | 1.81 | 0.0000000       | 0.00 | 0.0563343       | 0.10 |
| 15D01893                    | 11.7 % | 0.0583588       | 1.86 | 0.0000000       |      |                  |      |                  |       |                  |      |                 |      |                 |      |                 |      |                  |      |                  |       |                 |      |                  |      |                 |      |                 |      |                 |      |                 |      |



| Additional<br>Parameters |        |   | 40Ar/39Ar | 1σ       | 37Ar/39Ar | 1σ       | 36Ar/39Ar | 1σ       | Time<br>(days) | 37Ar<br>(decay) | 39Ar<br>(decay) | 40Ar<br>(moles) |
|--------------------------|--------|---|-----------|----------|-----------|----------|-----------|----------|----------------|-----------------|-----------------|-----------------|
| 15D01853                 | 1.9 %  |   | 9.707740  | 0.010715 | 0.263285  | 0.004680 | 0.008443  | 0.000044 | 83.951         | 5.262866        | 1.00059342      | 2.212E-11       |
| 15D01854                 | 2.0 %  | ✓ | 9.058096  | 0.010387 | 0.298994  | 0.005020 | 0.006545  | 0.000040 | 83.960         | 5.263733        | 1.00059348      | 1.939E-11       |
| 15D01856                 | 2.1 %  | ✓ | 8.705108  | 0.011140 | 0.327530  | 0.006107 | 0.005422  | 0.000038 | 83.977         | 5.265538        | 1.00059360      | 1.550E-11       |
| 15D01857                 | 2.2 %  | ✓ | 8.543684  | 0.015459 | 0.321279  | 0.009890 | 0.004946  | 0.000046 | 83.986         | 5.266477        | 1.00059366      | 9.645E-12       |
| 15D01858                 | 2.3 %  | ✓ | 8.455884  | 0.013309 | 0.393182  | 0.008575 | 0.004601  | 0.000043 | 83.994         | 5.267344        | 1.00059372      | 1.102E-11       |
| 15D01860                 | 2.4 %  | ✓ | 8.353195  | 0.012119 | 0.443183  | 0.007228 | 0.004232  | 0.000034 | 84.012         | 5.269151        | 1.00059385      | 1.290E-11       |
| 15D01861                 | 2.5 %  | ✓ | 8.201341  | 0.013200 | 0.495305  | 0.008124 | 0.003941  | 0.000040 | 84.021         | 5.270090        | 1.00059391      | 1.096E-11       |
| 15D01862                 | 2.6 %  | ✓ | 8.162572  | 0.013641 | 0.536676  | 0.008470 | 0.003726  | 0.000037 | 84.029         | 5.270958        | 1.00059397      | 1.086E-11       |
| 15D01864                 | 2.7 %  | ✓ | 8.107920  | 0.016437 | 0.539280  | 0.010699 | 0.003546  | 0.000048 | 84.047         | 5.272766        | 1.00059409      | 8.138E-12       |
| 15D01865                 | 2.8 %  | ✓ | 8.034720  | 0.012817 | 0.653608  | 0.008495 | 0.003447  | 0.000037 | 84.055         | 5.273634        | 1.00059415      | 1.031E-11       |
| 15D01866                 | 2.9 %  | ✓ | 7.925406  | 0.016704 | 0.655697  | 0.011084 | 0.003239  | 0.000048 | 84.064         | 5.274574        | 1.00059421      | 7.657E-12       |
| 15D01868                 | 3.0 %  | ✓ | 7.926088  | 0.015670 | 0.752484  | 0.011285 | 0.003206  | 0.000044 | 84.081         | 5.276383        | 1.00059434      | 8.115E-12       |
| 15D01869                 | 3.2 %  | ✓ | 7.875115  | 0.012229 | 0.862008  | 0.008697 | 0.003033  | 0.000033 | 84.090         | 5.277252        | 1.00059439      | 1.043E-11       |
| 15D01870                 | 3.4 %  | ✓ | 7.811101  | 0.011865 | 0.955233  | 0.008402 | 0.002857  | 0.000034 | 84.099         | 5.278193        | 1.00059446      | 1.079E-11       |
| 15D01872                 | 3.6 %  | ✓ | 7.759767  | 0.011105 | 1.094275  | 0.008027 | 0.002802  | 0.000031 | 84.116         | 5.280003        | 1.00059458      | 1.171E-11       |
| 15D01873                 | 3.8 %  | ✓ | 7.737828  | 0.015789 | 1.072703  | 0.011520 | 0.002720  | 0.000041 | 84.124         | 5.280872        | 1.00059464      | 7.758E-12       |
| 15D01874                 | 4.0 %  | ✓ | 7.653271  | 0.012893 | 1.239890  | 0.010344 | 0.002590  | 0.000037 | 84.133         | 5.281814        | 1.00059470      | 9.235E-12       |
| 15D01876                 | 4.3 %  |   | 7.538845  | 0.009826 | 1.499037  | 0.008123 | 0.002457  | 0.000029 | 84.150         | 5.283553        | 1.00059482      | 1.299E-11       |
| 15D01877                 | 4.6 %  |   | 7.549938  | 0.012708 | 1.505000  | 0.010582 | 0.002465  | 0.000035 | 84.159         | 5.284495        | 1.00059488      | 9.115E-12       |
| 15D01878                 | 4.9 %  |   | 7.407830  | 0.008852 | 1.896302  | 0.008354 | 0.002248  | 0.000022 | 84.167         | 5.285365        | 1.00059494      | 1.527E-11       |
| 15D01880                 | 5.2 %  |   | 7.331570  | 0.008963 | 2.064629  | 0.009116 | 0.002245  | 0.000026 | 84.185         | 5.287178        | 1.00059507      | 1.379E-11       |
| 15D01881                 | 5.5 %  |   | 7.313094  | 0.011353 | 2.177097  | 0.010815 | 0.002237  | 0.000030 | 84.194         | 5.288121        | 1.00059513      | 1.020E-11       |
| 15D01882                 | 5.8 %  |   | 7.195613  | 0.008521 | 2.528193  | 0.010073 | 0.002175  | 0.000024 | 84.202         | 5.288991        | 1.00059519      | 1.433E-11       |
| 15D01884                 | 6.1 %  |   | 7.096585  | 0.008813 | 2.796668  | 0.011121 | 0.002182  | 0.000025 | 84.219         | 5.290805        | 1.00059531      | 1.382E-11       |
| 15D01885                 | 6.5 %  |   | 7.001305  | 0.009758 | 2.967944  | 0.012462 | 0.002186  | 0.000027 | 84.228         | 5.291749        | 1.00059538      | 1.123E-11       |
| 15D01886                 | 7.0 %  |   | 6.942346  | 0.009080 | 3.305902  | 0.013225 | 0.002173  | 0.000025 | 84.237         | 5.292620        | 1.00059543      | 1.206E-11       |
| 15D01888                 | 7.6 %  |   | 6.854007  | 0.008192 | 3.665469  | 0.013623 | 0.002190  | 0.000024 | 84.254         | 5.294435        | 1.00059556      | 1.411E-11       |
| 15D01889                 | 8.4 %  |   | 6.737733  | 0.007152 | 4.063772  | 0.014397 | 0.002263  | 0.000022 | 84.263         | 5.295307        | 1.00059562      | 1.647E-11       |
| 15D01890                 | 9.4 %  |   | 6.680346  | 0.006925 | 4.587036  | 0.016008 | 0.002346  | 0.000021 | 84.272         | 5.296251        | 1.00059568      | 1.808E-11       |
| 15D01892                 | 10.5 % |   | 6.554188  | 0.006656 | 5.142399  | 0.017796 | 0.002511  | 0.000020 | 84.289         | 5.298067        | 1.00059580      | 1.761E-11       |
| 15D01893                 | 11.7 % |   | 6.508880  | 0.007477 | 5.784833  | 0.020214 | 0.002740  | 0.000022 | 84.297         | 5.298940        | 1.00059586      | 1.505E-11       |
| 15D01894                 | 13.1 % |   | 6.357790  | 0.007557 | 6.335649  | 0.022188 | 0.002873  | 0.000026 | 84.306         | 5.299885        | 1.00059592      | 1.310E-11       |
| 15D01896                 | 14.7 % |   | 6.211304  | 0.008219 | 6.848465  | 0.024455 | 0.003129  | 0.000029 | 84.324         | 5.301702        | 1.00059605      | 1.073E-11       |
| 15D01897                 | 16.5 % |   | 6.035533  | 0.009878 | 7.413472  | 0.027761 | 0.003570  | 0.000038 | 84.332         | 5.302575        | 1.00059611      | 7.845E-12       |
| 15D01898                 | 18.3 % |   | 5.876824  | 0.013149 | 8.670336  | 0.034973 | 0.004370  | 0.000049 | 84.341         | 5.303521        | 1.00059617      | 5.385E-12       |
| 15D01900                 | 20.2 % |   | 5.682891  | 0.017444 | 12.479724 | 0.055728 | 0.006237  | 0.000071 | 84.371         | 5.306650        | 1.00059638      | 3.675E-12       |
| 15D01901                 | 22.2 % |   | 6.017587  | 0.027505 | 22.295106 | 0.119875 | 0.010546  | 0.000119 | 84.380         | 5.307596        | 1.00059644      | 2.533E-12       |
| 15D01903                 | 24.5 % |   | 7.001865  | 0.052107 | 42.222603 | 0.326083 | 0.018965  | 0.000234 | 84.398         | 5.309489        | 1.00059657      | 1.795E-12       |



| Procedure<br>Blanks |        | 36Ar<br>[fA] | 1σ        | 37Ar<br>[fA] | 1σ        | 38Ar<br>[fA] | 1σ        | 39Ar<br>[fA] | 1σ        | 40Ar<br>[fA] | 1σ        |
|---------------------|--------|--------------|-----------|--------------|-----------|--------------|-----------|--------------|-----------|--------------|-----------|
| 15D01853            | 1.9 %  | 0.0137696    | 0.0004587 | 0.0354421    | 0.0299253 | 0.0590368    | 0.0308425 | 0.0217349    | 0.0248880 | 3.8481158    | 0.0964149 |
| 15D01854            | 2.0 %  | 0.0132713    | 0.0004587 | 0.0213024    | 0.0299253 | 0.0613817    | 0.0308425 | 0.0207215    | 0.0248880 | 3.7245041    | 0.0964149 |
| 15D01856            | 2.1 %  | 0.0124107    | 0.0004587 | 0.0010699    | 0.0299253 | 0.0659770    | 0.0308425 | 0.0183345    | 0.0248880 | 3.5051314    | 0.0964149 |
| 15D01857            | 2.2 %  | 0.0120480    | 0.0004587 | 0.0093650    | 0.0299253 | 0.0682117    | 0.0308425 | 0.0169877    | 0.0248880 | 3.4094438    | 0.0964149 |
| 15D01858            | 2.3 %  | 0.0117590    | 0.0004587 | 0.0152519    | 0.0299253 | 0.0701805    | 0.0308425 | 0.0157039    | 0.0248880 | 3.3311300    | 0.0964149 |
| 15D01860            | 2.4 %  | 0.0112815    | 0.0004587 | 0.0228021    | 0.0299253 | 0.0739922    | 0.0308425 | 0.0129703    | 0.0248880 | 3.1955041    | 0.0964149 |
| 15D01861            | 2.5 %  | 0.0110913    | 0.0004587 | 0.0245857    | 0.0299253 | 0.0758194    | 0.0308425 | 0.0115493    | 0.0248880 | 3.1379851    | 0.0964149 |
| 15D01862            | 2.6 %  | 0.0109463    | 0.0004587 | 0.0251455    | 0.0299253 | 0.0774121    | 0.0308425 | 0.0102557    | 0.0248880 | 3.0918155    | 0.0964149 |
| 15D01864            | 2.7 %  | 0.0107243    | 0.0004587 | 0.0235731    | 0.0299253 | 0.0804402    | 0.0308425 | 0.0076646    | 0.0248880 | 3.0141844    | 0.0964149 |
| 15D01865            | 2.8 %  | 0.0106502    | 0.0004587 | 0.0217724    | 0.0299253 | 0.0817546    | 0.0308425 | 0.0064906    | 0.0248880 | 2.9845931    | 0.0964149 |
| 15D01866            | 2.9 %  | 0.0105894    | 0.0004587 | 0.0192422    | 0.0299253 | 0.0830766    | 0.0308425 | 0.0052829    | 0.0248880 | 2.9572890    | 0.0964149 |
| 15D01868            | 3.0 %  | 0.0105180    | 0.0004587 | 0.0131764    | 0.0299253 | 0.0853212    | 0.0308425 | 0.0031787    | 0.0248880 | 2.9163656    | 0.0964149 |
| 15D01869            | 3.2 %  | 0.0105002    | 0.0004587 | 0.0099149    | 0.0299253 | 0.0862594    | 0.0308425 | 0.0022826    | 0.0248880 | 2.9011394    | 0.0964149 |
| 15D01870            | 3.4 %  | 0.0104896    | 0.0004587 | 0.0062655    | 0.0299253 | 0.0871740    | 0.0308425 | 0.0014019    | 0.0248880 | 2.8872084    | 0.0964149 |
| 15D01872            | 3.6 %  | 0.0104866    | 0.0004587 | 0.0007346    | 0.0299253 | 0.0886350    | 0.0308425 | 0.0000156    | 0.0248880 | 2.8661699    | 0.0964149 |
| 15D01873            | 3.8 %  | 0.0104896    | 0.0004587 | 0.0039384    | 0.0299253 | 0.0891971    | 0.0308425 | 0.0005638    | 0.0248880 | 2.8580266    | 0.0964149 |
| 15D01874            | 4.0 %  | 0.0104939    | 0.0004587 | 0.0072015    | 0.0299253 | 0.0897042    | 0.0308425 | 0.0010603    | 0.0248880 | 2.8501604    | 0.0964149 |
| 15D01876            | 4.3 %  | 0.0104994    | 0.0004587 | 0.0124534    | 0.0299253 | 0.0903621    | 0.0308425 | 0.0017161    | 0.0248880 | 2.8371677    | 0.0964149 |
| 15D01877            | 4.6 %  | 0.0104988    | 0.0004587 | 0.0147883    | 0.0299253 | 0.0905676    | 0.0308425 | 0.0019358    | 0.0248880 | 2.8304493    | 0.0964149 |
| 15D01878            | 4.9 %  | 0.0104947    | 0.0004587 | 0.0165825    | 0.0299253 | 0.0906634    | 0.0308425 | 0.0020592    | 0.0248880 | 2.8241900    | 0.0964149 |
| 15D01880            | 5.2 %  | 0.0104727    | 0.0004587 | 0.0191206    | 0.0299253 | 0.0905729    | 0.0308425 | 0.0020948    | 0.0248880 | 2.8103670    | 0.0964149 |
| 15D01881            | 5.5 %  | 0.0104532    | 0.0004587 | 0.0197755    | 0.0299253 | 0.0903711    | 0.0308425 | 0.0020104    | 0.0248880 | 2.8025308    | 0.0964149 |
| 15D01882            | 5.8 %  | 0.0104299    | 0.0004587 | 0.0199750    | 0.0299253 | 0.0900907    | 0.0308425 | 0.0018809    | 0.0248880 | 2.7948191    | 0.0964149 |
| 15D01884            | 6.1 %  | 0.0103654    | 0.0004587 | 0.0191871    | 0.0299253 | 0.0892167    | 0.0308425 | 0.0014935    | 0.0248880 | 2.7772249    | 0.0964149 |
| 15D01885            | 6.5 %  | 0.0103238    | 0.0004587 | 0.0181811    | 0.0299253 | 0.0886074    | 0.0308425 | 0.0012540    | 0.0248880 | 2.7673234    | 0.0964149 |
| 15D01886            | 7.0 %  | 0.0102811    | 0.0004587 | 0.0169319    | 0.0299253 | 0.0879509    | 0.0308425 | 0.0010267    | 0.0248880 | 2.7578207    | 0.0964149 |
| 15D01888            | 7.6 %  | 0.0101818    | 0.0004587 | 0.0135180    | 0.0299253 | 0.0862933    | 0.0308425 | 0.0005928    | 0.0248880 | 2.7374013    | 0.0964149 |
| 15D01889            | 8.4 %  | 0.0101309    | 0.0004587 | 0.0115926    | 0.0299253 | 0.0853585    | 0.0308425 | 0.0004337    | 0.0248880 | 2.7276153    | 0.0964149 |
| 15D01890            | 9.4 %  | 0.0100751    | 0.0004587 | 0.0093879    | 0.0299253 | 0.0842440    | 0.0308425 | 0.0003221    | 0.0248880 | 2.7173193    | 0.0964149 |
| 15D01892            | 10.5 % | 0.0099715    | 0.0004587 | 0.0051181    | 0.0299253 | 0.0818028    | 0.0308425 | 0.0003630    | 0.0248880 | 2.6994854    | 0.0964149 |
| 15D01893            | 11.7 % | 0.0099267    | 0.0004587 | 0.0032223    | 0.0299253 | 0.0804919    | 0.0308425 | 0.0005415    | 0.0248880 | 2.6924272    | 0.0964149 |
| 15D01894            | 13.1 % | 0.0098843    | 0.0004587 | 0.0014185    | 0.0299253 | 0.0789699    | 0.0308425 | 0.0008821    | 0.0248880 | 2.6863684    | 0.0964149 |
| 15D01896            | 14.7 % | 0.0098296    | 0.0004587 | 0.0008671    | 0.0299253 | 0.0757452    | 0.0308425 | 0.0020640    | 0.0248880 | 2.6809951    | 0.0964149 |
| 15D01897            | 16.5 % | 0.0098203    | 0.0004587 | 0.0011799    | 0.0299253 | 0.0740582    | 0.0308425 | 0.0029256    | 0.0248880 | 2.6821979    | 0.0964149 |
| 15D01898            | 18.3 % | 0.0098263    | 0.0004587 | 0.0007610    | 0.0299253 | 0.0721287    | 0.0308425 | 0.0041114    | 0.0248880 | 2.6869506    | 0.0964149 |
| 15D01900            | 20.2 % | 0.0100056    | 0.0004587 | 0.0083093    | 0.0299253 | 0.0649919    | 0.0308425 | 0.0103076    | 0.0248880 | 2.7360028    | 0.0964149 |
| 15D01901            | 22.2 % | 0.0101218    | 0.0004587 | 0.0140677    | 0.0299253 | 0.0626061    | 0.0308425 | 0.0129998    | 0.0248880 | 2.7635360    | 0.0964149 |
| 15D01903            | 24.5 % | 0.0104655    | 0.0004587 | 0.0310454    | 0.0299253 | 0.0575167    | 0.0308425 | 0.0197578    | 0.0248880 | 2.8411146    | 0.0964149 |



| OSU Argon Geochronology Lab |        |           |           |        |                |      |         |        |        |                |      |          |          |        |                |      |         |        |        |                |      |          |        |        |                |
|-----------------------------|--------|-----------|-----------|--------|----------------|------|---------|--------|--------|----------------|------|----------|----------|--------|----------------|------|---------|--------|--------|----------------|------|----------|--------|--------|----------------|
| Intercept<br>Values         | 36Ar   |           |           |        |                | 37Ar |         |        |        |                | 38Ar |          |          |        |                | 39Ar |         |        |        |                | 40Ar |          |        |        |                |
|                             |        | [fA]      | 1σ        | r2     |                |      | [fA]    | 1σ     | r2     |                |      | [fA]     | 1σ       | r2     |                |      | [fA]    | 1σ     | r2     |                |      | [fA]     | 1σ     | r2     |                |
| 15D01853                    | 1.9 %  | 0.3907196 | 0.0014799 | 0.3458 | EXP 150 of 150 |      | 2.3642  | 0.0275 | 0.1495 | EXP 150 of 150 |      | 1.510694 | 0.026845 | 0.1569 | EXP 150 of 150 |      | 47.1105 | 0.0294 | 0.9908 | EXP 150 of 150 |      | 465.8994 | 0.0538 | 0.9988 | EXP 150 of 150 |
| 15D01854                    | 2.0 %  | 0.2877751 | 0.0013567 | 0.2096 | EXP 150 of 150 |      | 2.5052  | 0.0278 | 0.1678 | EXP 150 of 150 |      | 1.326818 | 0.026089 | 0.0536 | EXP 150 of 150 |      | 44.2538 | 0.0291 | 0.9898 | EXP 150 of 150 |      | 408.7152 | 0.0529 | 0.9984 | EXP 150 of 150 |
| 15D01856                    | 2.1 %  | 0.2016536 | 0.0010668 | 0.0002 | EXP 150 of 150 |      | 2.2626  | 0.0287 | 0.1905 | EXP 150 of 150 |      | 1.078348 | 0.026019 | 0.0424 | EXP 150 of 150 |      | 36.8286 | 0.0280 | 0.9865 | EXP 150 of 150 |      | 327.4189 | 0.0488 | 0.9977 | EXP 150 of 150 |
| 15D01857                    | 2.2 %  | 0.1214518 | 0.0008367 | 0.0798 | EXP 150 of 150 |      | 1.3977  | 0.0309 | 0.0427 | EXP 150 of 150 |      | 0.656903 | 0.024301 | 0.0306 | EXP 149 of 150 |      | 23.3359 | 0.0274 | 0.9683 | EXP 150 of 150 |      | 204.8934 | 0.0379 | 0.9932 | EXP 150 of 150 |
| 15D01858                    | 2.3 %  | 0.1292315 | 0.0009022 | 0.0650 | EXP 150 of 150 |      | 1.9717  | 0.0305 | 0.2126 | EXP 149 of 150 |      | 0.849385 | 0.027320 | 0.0918 | EXP 150 of 150 |      | 26.9356 | 0.0260 | 0.9782 | EXP 150 of 150 |      | 233.4711 | 0.0379 | 0.9959 | EXP 150 of 150 |
| 15D01860                    | 2.4 %  | 0.1393038 | 0.0008338 | 0.0282 | EXP 150 of 150 |      | 2.6304  | 0.0299 | 0.0822 | EXP 149 of 150 |      | 0.916929 | 0.025055 | 0.0434 | EXP 150 of 150 |      | 31.9263 | 0.0294 | 0.9801 | EXP 150 of 150 |      | 272.6163 | 0.0466 | 0.9966 | EXP 150 of 150 |
| 15D01861                    | 2.5 %  | 0.1143146 | 0.0008695 | 0.0537 | EXP 150 of 150 |      | 2.5422  | 0.0282 | 0.2521 | EXP 149 of 150 |      | 0.759506 | 0.026884 | 0.0163 | EXP 150 of 150 |      | 27.6410 | 0.0286 | 0.9749 | EXP 150 of 150 |      | 232.1582 | 0.0439 | 0.9948 | EXP 150 of 150 |
| 15D01862                    | 2.6 %  | 0.1080478 | 0.0007871 | 0.1061 | EXP 150 of 150 |      | 2.7416  | 0.0302 | 0.1879 | EXP 150 of 150 |      | 0.754391 | 0.029095 | 0.0215 | EXP 150 of 150 |      | 27.5026 | 0.0310 | 0.9705 | EXP 150 of 150 |      | 229.8780 | 0.0394 | 0.9957 | EXP 150 of 150 |
| 15D01864                    | 2.7 %  | 0.0804666 | 0.0007897 | 0.2490 | EXP 150 of 150 |      | 2.0738  | 0.0278 | 0.1253 | EXP 150 of 150 |      | 0.524589 | 0.024894 | 0.0030 | EXP 150 of 150 |      | 20.7559 | 0.0278 | 0.9571 | EXP 150 of 150 |      | 173.0206 | 0.0429 | 0.9856 | EXP 150 of 150 |
| 15D01865                    | 2.8 %  | 0.0973031 | 0.0007571 | 0.1602 | EXP 150 of 150 |      | 3.2267  | 0.0275 | 0.3084 | EXP 150 of 150 |      | 0.712825 | 0.027404 | 0.0415 | EXP 149 of 150 |      | 26.5314 | 0.0256 | 0.9785 | EXP 150 of 150 |      | 218.3082 | 0.0430 | 0.9942 | EXP 150 of 150 |
| 15D01866                    | 2.9 %  | 0.0719149 | 0.0007450 | 0.2972 | EXP 150 of 150 |      | 2.4347  | 0.0272 | 0.3155 | EXP 149 of 150 |      | 0.558406 | 0.027943 | 0.0706 | EXP 150 of 150 |      | 19.9816 | 0.0282 | 0.9539 | EXP 150 of 150 |      | 162.9209 | 0.0357 | 0.9865 | EXP 150 of 150 |
| 15D01868                    | 3.0 %  | 0.0748332 | 0.0007088 | 0.2439 | EXP 150 of 150 |      | 2.9703  | 0.0314 | 0.3315 | EXP 149 of 150 |      | 0.567048 | 0.023847 | 0.0532 | EXP 150 of 150 |      | 21.1780 | 0.0272 | 0.9607 | EXP 150 of 150 |      | 172.4532 | 0.0412 | 0.9879 | EXP 150 of 150 |
| 15D01869                    | 3.2 %  | 0.0892028 | 0.0006824 | 0.2545 | EXP 150 of 150 |      | 4.4094  | 0.0292 | 0.4069 | EXP 150 of 150 |      | 0.714740 | 0.026880 | 0.0768 | EXP 150 of 150 |      | 27.3910 | 0.0253 | 0.9804 | EXP 150 of 150 |      | 220.7503 | 0.0447 | 0.9943 | EXP 150 of 150 |
| 15D01870                    | 3.4 %  | 0.0878448 | 0.0007688 | 0.2926 | EXP 150 of 150 |      | 5.1034  | 0.0283 | 0.4732 | EXP 150 of 150 |      | 0.627034 | 0.027211 | 0.0003 | EXP 150 of 150 |      | 28.5849 | 0.0263 | 0.9803 | EXP 150 of 150 |      | 228.3758 | 0.0386 | 0.9962 | EXP 150 of 150 |
| 15D01872                    | 3.6 %  | 0.0933708 | 0.0007598 | 0.1427 | EXP 150 of 150 |      | 6.3923  | 0.0284 | 0.6418 | EXP 150 of 150 |      | 0.716457 | 0.027700 | 0.0180 | EXP 150 of 150 |      | 31.2256 | 0.0268 | 0.9832 | EXP 150 of 150 |      | 247.5550 | 0.0422 | 0.9966 | EXP 150 of 150 |
| 15D01873                    | 3.8 %  | 0.0639249 | 0.0006430 | 0.3234 | EXP 150 of 150 |      | 4.1650  | 0.0293 | 0.3478 | EXP 150 of 150 |      | 0.467389 | 0.028808 | 0.0121 | EXP 150 of 150 |      | 20.7413 | 0.0280 | 0.9576 | EXP 150 of 150 |      | 164.9264 | 0.0389 | 0.9856 | EXP 150 of 150 |
| 15D01874                    | 4.0 %  | 0.0717293 | 0.0007089 | 0.2768 | EXP 150 of 150 |      | 5.7946  | 0.0318 | 0.5275 | EXP 150 of 150 |      | 0.533919 | 0.025209 | 0.0052 | EXP 150 of 150 |      | 24.9629 | 0.0257 | 0.9754 | EXP 150 of 150 |      | 195.7704 | 0.0409 | 0.9925 | EXP 150 of 150 |
| 15D01876                    | 4.3 %  | 0.0934717 | 0.0008198 | 0.1469 | EXP 150 of 150 |      | 10.0009 | 0.0293 | 0.7577 | EXP 150 of 150 |      | 0.721805 | 0.023190 | 0.0097 | EXP 149 of 150 |      | 35.6472 | 0.0269 | 0.9869 | EXP 150 of 150 |      | 274.2083 | 0.0422 | 0.9976 | EXP 149 of 150 |
| 15D01877                    | 4.6 %  | 0.0688078 | 0.0006681 | 0.3022 | EXP 150 of 150 |      | 7.0398  | 0.0302 | 0.6545 | EXP 150 of 150 |      | 0.545855 | 0.025693 | 0.0695 | EXP 150 of 150 |      | 24.9769 | 0.0256 | 0.9746 | EXP 150 of 150 |      | 193.2463 | 0.0364 | 0.9938 | EXP 150 of 150 |
| 15D01878                    | 4.9 %  | 0.1013004 | 0.0007265 | 0.2973 | EXP 150 of 150 |      | 15.1265 | 0.0300 | 0.8907 | EXP 150 of 150 |      | 0.815767 | 0.027197 | 0.0120 | EXP 149 of 150 |      | 42.6427 | 0.0295 | 0.9890 | EXP 150 of 150 |      | 321.8083 | 0.0499 | 0.9978 | EXP 150 of 150 |
| 15D01880                    | 5.2 %  | 0.0931987 | 0.0007842 | 0.1510 | EXP 150 of 150 |      | 15.0211 | 0.0297 | 0.8894 | EXP 150 of 150 |      | 0.717241 | 0.027477 | 0.0114 | EXP 150 of 150 |      | 38.8997 | 0.0263 | 0.9894 | EXP 150 of 150 |      | 290.7983 | 0.0422 | 0.9980 | EXP 150 of 150 |
| 15D01881                    | 5.5 %  | 0.0715682 | 0.0006561 | 0.3822 | EXP 148 of 150 |      | 11.7487 | 0.0282 | 0.8485 | EXP 150 of 150 |      | 0.496728 | 0.026603 | 0.0005 | EXP 150 of 150 |      | 28.8472 | 0.0278 | 0.9782 | EXP 150 of 150 |      | 215.8271 | 0.0422 | 0.9945 | EXP 150 of 150 |
| 15D01882                    | 5.8 %  | 0.0952941 | 0.0007811 | 0.2458 | EXP 150 of 150 |      | 19.4647 | 0.0275 | 0.9365 | EXP 150 of 150 |      | 0.720948 | 0.025811 | 0.0091 | EXP 150 of 150 |      | 41.1887 | 0.0266 | 0.9903 | EXP 150 of 150 |      | 302.0766 | 0.0454 | 0.9978 | EXP 150 of 150 |
| 15D01884                    | 6.1 %  | 0.0936288 | 0.0007716 | 0.1874 | EXP 150 of 150 |      | 21.0499 | 0.0309 | 0.9356 | EXP 150 of 150 |      | 0.700288 | 0.024503 | 0.0262 | EXP 150 of 150 |      | 40.2851 | 0.0292 | 0.9876 | EXP 150 of 150 |      | 291.4674 | 0.0490 | 0.9972 | EXP 150 of 150 |
| 15D01885                    | 6.5 %  | 0.0790214 | 0.0006824 | 0.2270 | EXP 150 of 150 |      | 18.3982 | 0.0319 | 0.9156 | EXP 150 of 150 |      | 0.546830 | 0.025959 | 0.0132 | EXP 150 of 150 |      | 33.1817 | 0.0274 | 0.9844 | EXP 150 of 150 |      | 237.3606 | 0.0438 | 0.9956 | EXP 150 of 150 |
| 15D01886                    | 7.0 %  | 0.0842291 | 0.0006728 | 0.3096 | EXP 150 of 150 |      | 22.1782 | 0.0345 | 0.9338 | EXP 149 of 150 |      | 0.559037 | 0.029573 | 0.0043 | EXP 150 of 150 |      | 35.9237 | 0.0268 | 0.9872 | EXP 150 of 150 |      | 254.6010 | 0.0460 | 0.9961 | EXP 150 of 150 |
| 15D01888                    | 7.6 %  | 0.0985372 | 0.0008142 | 0.2213 | EXP 150 of 150 |      | 29.1362 | 0.0324 | 0.9632 | EXP 150 of 150 |      | 0.679599 | 0.025115 | 0.0238 | EXP 150 of 150 |      | 42.5912 | 0.0286 | 0.9894 | EXP 150 of 150 |      | 297.5280 | 0.0552 | 0.9966 | EXP 150 of 150 |
| 15D01889                    | 8.4 %  | 0.1185070 | 0.0008804 | 0.1671 | EXP 150 of 150 |      | 38.3365 | 0.0316 | 0.9798 | EXP 150 of 150 |      | 0.777483 | 0.026902 | 0.0009 | EXP 150 of 150 |      | 50.5638 | 0.0272 | 0.9931 | EXP 150 of 150 |      | 346.7640 | 0.0535 | 0.9979 | EXP 150 of 150 |
| 15D01890                    | 9.4 %  | 0.1345151 | 0.0009566 | 0.1702 | EXP 150 of 150 |      | 47.9077 | 0.0358 | 0.9824 | EXP 150 of 150 |      | 0.935040 | 0.026554 | 0.0739 | EXP 150 of 150 |      | 55.9954 | 0.0307 | 0.9930 | EXP 150 of 150 |      | 380.4667 | 0.0508 | 0.9985 | EXP 150 of 150 |
| 15D01892                    | 10.5 % | 0.1421744 | 0.0008841 | 0.1218 | EXP 150 of 150 |      | 53.2842 | 0.0369 | 0.9857 | EXP 150 of 150 |      | 0.963681 | 0.029561 | 0.0818 | EXP 150 of 150 |      | 55.5782 | 0.0277 | 0.9943 | EXP 150 of 150 |      | 370.5534 | 0.0531 | 0.9982 | EXP 150 of 150 |
| 15D01893                    | 11.7 % | 0.1340395 | 0.0008006 | 0.0746 | EXP 150 of 150 |      | 51.5644 | 0.0339 | 0.9871 | EXP 150 of 150 |      | 0.788470 | 0.026055 | 0.0239 | EXP 150 of 150 |      | 47.8210 | 0.0316 | 0.9897 | EXP 150 of 150 |      | 317.0147 | 0.0493 | 0.9975 | EXP 150 of 150 |
| 15D01894                    | 13.1 % | 0.1259242 | 0.0008556 | 0.1284 | EXP 149 of 150 |      | 50.3386 | 0.0320 | 0.9876 | EXP 150 of 150 |      | 0.713722 | 0.029600 | 0.0257 | EXP 150 of 150 |      | 42.6350 | 0.0280 | 0.9903 | EXP 150 of 150 |      | 276.4141 | 0.0429 | 0.9970 | EXP 150 of 150 |
| 15D01896                    | 14.7 % | 0.1157580 | 0.0008029 | 0.1533 | EXP 150 of 150 |      | 45.5957 | 0.0336 | 0.9836 | EXP 149 of 150 |      | 0.643471 | 0.030139 | 0.0188 | EXP 150 of 150 |      | 35.7415 | 0.0266 | 0.9868 | EXP 149 of 150 |      | 226.8550 | 0.0405 | 0.9947 | EXP 150 of 150 |
| 15D01897                    | 16.5 % | 0.1007573 | 0.0007914 | 0.2066 | EXP 150 of 150 |      | 37.1301 | 0.0343 | 0.9736 | EXP 150 of 150 |      | 0.459007 | 0.029034 | 0.0029 | EXP 150 of 150 |      | 26.8934 | 0.0259 | 0.9778 | EXP 150 of 150 |      | 166.5785 | 0.0392 | 0.9754 | EXP 150 of 150 |
| 15D01898                    | 18.3 % | 0.0883060 | 0.0006951 | 0.2838 | EXP 150 of 150 |      | 30.6088 | 0.0294 | 0.9720 | EXP 150 of 150 |      | 0.299417 | 0.029143 | 0.0000 | EXP 150 of 150 |      | 18.9615 | 0.0263 | 0.9550 | EXP 150 of 150 |      | 115.1932 | 0.0403 |        |                |







[illegible]



| Irradiation<br>Constants | 40/36(a) |       | %1σ | 40/36(c) |    | %1σ    | 38/36(a) |       | %1σ | 38/36(c) |   | %1σ       | 39/37(ca) |          | %1σ | 38/37(ca) |   | %1σ     | 36/37(ca) |   | %1σ | 40/39(k) |      | %1σ | 38/39(k) |   | %1σ | 36/38(cl) |   | %1σ | K/Ca | %1σ | K/Cl | %1σ | Ca/Cl | %1σ |
|--------------------------|----------|-------|-----|----------|----|--------|----------|-------|-----|----------|---|-----------|-----------|----------|-----|-----------|---|---------|-----------|---|-----|----------|------|-----|----------|---|-----|-----------|---|-----|------|-----|------|-----|-------|-----|
|                          |          |       |     |          |    |        |          |       |     |          |   |           |           |          |     |           |   |         |           |   |     |          |      |     |          |   |     |           |   |     |      |     |      |     |       |     |
| 15D01853                 | 1.9 %    | 295.5 | 0   | 0.018    | 35 | 0.1869 | 0        | 1.493 | 3   | 0.000673 | 0 | 0.0000139 | 0         | 0.000264 | 0   | 0.00101   | 0 | 0.01138 | 0         | 0 | 0   | 0        | 0.43 | 0   | 0        | 0 | 0   | 0         | 0 | 0   | 0    | 0   | 0    | 0   | 0     | 0   |
| 15D01854                 | 2.0 %    | 295.5 | 0   | 0.018    | 35 | 0.1869 | 0        | 1.493 | 3   | 0.000673 | 0 | 0.0000139 | 0         | 0.000264 | 0   | 0.00101   | 0 | 0.01138 | 0         | 0 | 0   | 0        | 0.43 | 0   | 0        | 0 | 0   | 0         | 0 | 0   | 0    | 0   | 0    | 0   | 0     | 0   |
| 15D01856                 | 2.1 %    | 295.5 | 0   | 0.018    | 35 | 0.1869 | 0        | 1.493 | 3   | 0.000673 | 0 | 0.0000139 | 0         | 0.000264 | 0   | 0.00101   | 0 | 0.01138 | 0         | 0 | 0   | 0        | 0.43 | 0   | 0        | 0 | 0   | 0         | 0 | 0   | 0    | 0   | 0    | 0   | 0     | 0   |
| 15D01857                 | 2.2 %    | 295.5 | 0   | 0.018    | 35 | 0.1869 | 0        | 1.493 | 3   | 0.000673 | 0 | 0.0000139 | 0         | 0.000264 | 0   | 0.00101   | 0 | 0.01138 | 0         | 0 | 0   | 0        | 0.43 | 0   | 0        | 0 | 0   | 0         | 0 | 0   | 0    | 0   | 0    | 0   | 0     | 0   |
| 15D01858                 | 2.3 %    | 295.5 | 0   | 0.018    | 35 | 0.1869 | 0        | 1.493 | 3   | 0.000673 | 0 | 0.0000139 | 0         | 0.000264 | 0   | 0.00101   | 0 | 0.01138 | 0         | 0 | 0   | 0        | 0.43 | 0   | 0        | 0 | 0   | 0         | 0 | 0   | 0    | 0   | 0    | 0   | 0     | 0   |
| 15D01860                 | 2.4 %    | 295.5 | 0   | 0.018    | 35 | 0.1869 | 0        | 1.493 | 3   | 0.000673 | 0 | 0.0000139 | 0         | 0.000264 | 0   | 0.00101   | 0 | 0.01138 | 0         | 0 | 0   | 0        | 0.43 | 0   | 0        | 0 | 0   | 0         | 0 | 0   | 0    | 0   | 0    | 0   | 0     | 0   |
| 15D01861                 | 2.5 %    | 295.5 | 0   | 0.018    | 35 | 0.1869 | 0        | 1.493 | 3   | 0.000673 | 0 | 0.0000139 | 0         | 0.000264 | 0   | 0.00101   | 0 | 0.01138 | 0         | 0 | 0   | 0        | 0.43 | 0   | 0        | 0 | 0   | 0         | 0 | 0   | 0    | 0   | 0    | 0   | 0     | 0   |
| 15D01862                 | 2.6 %    | 295.5 | 0   | 0.018    | 35 | 0.1869 | 0        | 1.493 | 3   | 0.000673 | 0 | 0.0000139 | 0         | 0.000264 | 0   | 0.00101   | 0 | 0.01138 | 0         | 0 | 0   | 0        | 0.43 | 0   | 0        | 0 | 0   | 0         | 0 | 0   | 0    | 0   | 0    | 0   | 0     | 0   |
| 15D01864                 | 2.7 %    | 295.5 | 0   | 0.018    | 35 | 0.1869 | 0        | 1.493 | 3   | 0.000673 | 0 | 0.0000139 | 0         | 0.000264 | 0   | 0.00101   | 0 | 0.01138 | 0         | 0 | 0   | 0        | 0.43 | 0   | 0        | 0 | 0   | 0         | 0 | 0   | 0    | 0   | 0    | 0   | 0     | 0   |
| 15D01865                 | 2.8 %    | 295.5 | 0   | 0.018    | 35 | 0.1869 | 0        | 1.493 | 3   | 0.000673 | 0 | 0.0000139 | 0         | 0.000264 | 0   | 0.00101   | 0 | 0.01138 | 0         | 0 | 0   | 0        | 0.43 | 0   | 0        | 0 | 0   | 0         | 0 | 0   | 0    | 0   | 0    | 0   | 0     | 0   |
| 15D01866                 | 2.9 %    | 295.5 | 0   | 0.018    | 35 | 0.1869 | 0        | 1.493 | 3   | 0.000673 | 0 | 0.0000139 | 0         | 0.000264 | 0   | 0.00101   | 0 | 0.01138 | 0         | 0 | 0   | 0        | 0.43 | 0   | 0        | 0 | 0   | 0         | 0 | 0   | 0    | 0   | 0    | 0   | 0     | 0   |
| 15D01868                 | 3.0 %    | 295.5 | 0   | 0.018    | 35 | 0.1869 | 0        | 1.493 | 3   | 0.000673 | 0 | 0.0000139 | 0         | 0.000264 | 0   | 0.00101   | 0 | 0.01138 | 0         | 0 | 0   | 0        | 0.43 | 0   | 0        | 0 | 0   | 0         | 0 | 0   | 0    | 0   | 0    | 0   | 0     | 0   |
| 15D01869                 | 3.2 %    | 295.5 | 0   | 0.018    | 35 | 0.1869 | 0        | 1.493 | 3   | 0.000673 | 0 | 0.0000139 | 0         | 0.000264 | 0   | 0.00101   | 0 | 0.01138 | 0         | 0 | 0   | 0        | 0.43 | 0   | 0        | 0 | 0   | 0         | 0 | 0   | 0    | 0   | 0    | 0   | 0     | 0   |
| 15D01870                 | 3.4 %    | 295.5 | 0   | 0.018    | 35 | 0.1869 | 0        | 1.493 | 3   | 0.000673 | 0 | 0.0000139 | 0         | 0.000264 | 0   | 0.00101   | 0 | 0.01138 | 0         | 0 | 0   | 0        | 0.43 | 0   | 0        | 0 | 0   | 0         | 0 | 0   | 0    | 0   | 0    | 0   | 0     | 0   |
| 15D01872                 | 3.6 %    | 295.5 | 0   | 0.018    | 35 | 0.1869 | 0        | 1.493 | 3   | 0.000673 | 0 | 0.0000139 | 0         | 0.000264 | 0   | 0.00101   | 0 | 0.01138 | 0         | 0 | 0   | 0        | 0.43 | 0   | 0        | 0 | 0   | 0         | 0 | 0   | 0    | 0   | 0    | 0   | 0     | 0   |
| 15D01873                 | 3.8 %    | 295.5 | 0   | 0.018    | 35 | 0.1869 | 0        | 1.493 | 3   | 0.000673 | 0 | 0.0000139 | 0         | 0.000264 | 0   | 0.00101   | 0 | 0.01138 | 0         | 0 | 0   | 0        | 0.43 | 0   | 0        | 0 | 0   | 0         | 0 | 0   | 0    | 0   | 0    | 0   | 0     | 0   |
| 15D01874                 | 4.0 %    | 295.5 | 0   | 0.018    | 35 | 0.1869 | 0        | 1.493 | 3   | 0.000673 | 0 | 0.0000139 | 0         | 0.000264 | 0   | 0.00101   | 0 | 0.01138 | 0         | 0 | 0   | 0        | 0.43 | 0   | 0        | 0 | 0   | 0         | 0 | 0   | 0    | 0   | 0    | 0   | 0     | 0   |
| 15D01876                 | 4.3 %    | 295.5 | 0   | 0.018    | 35 | 0.1869 | 0        | 1.493 | 3   | 0.000673 | 0 | 0.0000139 | 0         | 0.000264 | 0   | 0.00101   | 0 | 0.01138 | 0         | 0 | 0   | 0        | 0.43 | 0   | 0        | 0 | 0   | 0         | 0 | 0   | 0    | 0   | 0    | 0   | 0     | 0   |
| 15D01877                 | 4.6 %    | 295.5 | 0   | 0.018    | 35 | 0.1869 | 0        | 1.493 | 3   | 0.000673 | 0 | 0.0000139 | 0         | 0.000264 | 0   | 0.00101   | 0 | 0.01138 | 0         | 0 | 0   | 0        | 0.43 | 0   | 0        | 0 | 0   | 0         | 0 | 0   | 0    | 0   | 0    | 0   | 0     | 0   |
| 15D01878                 | 4.9 %    | 295.5 | 0   | 0.018    | 35 | 0.1869 | 0        | 1.493 | 3   | 0.000673 | 0 | 0.0000139 | 0         | 0.000264 | 0   | 0.00101   | 0 | 0.01138 | 0         | 0 | 0   | 0        | 0.43 | 0   | 0        | 0 | 0   | 0         | 0 | 0   | 0    | 0   | 0    | 0   | 0     | 0   |
| 15D01880                 | 5.2 %    | 295.5 | 0   | 0.018    | 35 | 0.1869 | 0        | 1.493 | 3   | 0.000673 | 0 | 0.0000139 | 0         | 0.000264 | 0   | 0.00101   | 0 | 0.01138 | 0         | 0 | 0   | 0        | 0.43 | 0   | 0        | 0 | 0   | 0         | 0 | 0   | 0    | 0   | 0    | 0   | 0     | 0   |
| 15D01881                 | 5.5 %    | 295.5 | 0   | 0.018    | 35 | 0.1869 | 0        | 1.493 | 3   | 0.000673 | 0 | 0.0000139 | 0         | 0.000264 | 0   | 0.00101   | 0 | 0.01138 | 0         | 0 | 0   | 0        | 0.43 | 0   | 0        | 0 | 0   | 0         | 0 | 0   | 0    | 0   | 0    | 0   | 0     | 0   |
| 15D01882                 | 5.8 %    | 295.5 | 0   | 0.018    | 35 | 0.1869 | 0        | 1.493 | 3   | 0.000673 | 0 | 0.0000139 | 0         | 0.000264 | 0   | 0.00101   | 0 | 0.01138 | 0         | 0 | 0   | 0        | 0.43 | 0   | 0        | 0 | 0   | 0         | 0 | 0   | 0    | 0   | 0    | 0   | 0     | 0   |
| 15D01884                 | 6.1 %    | 295.5 | 0   | 0.018    | 35 | 0.1869 | 0        | 1.493 | 3   | 0.000673 | 0 | 0.0000139 | 0         | 0.000264 | 0   | 0.00101   | 0 | 0.01138 | 0         | 0 | 0   | 0        | 0.43 | 0   | 0        | 0 | 0   | 0         | 0 | 0   | 0    | 0   | 0    | 0   | 0     | 0   |
| 15D01885                 | 6.5 %    | 295.5 | 0   | 0.018    | 35 | 0.1869 | 0        | 1.493 | 3   | 0.000673 | 0 | 0.0000139 | 0         | 0.000264 | 0   | 0.00101   | 0 | 0.01138 | 0         | 0 | 0   | 0        | 0.43 | 0   | 0        | 0 | 0   | 0         | 0 | 0   | 0    | 0   | 0    | 0   | 0     | 0   |
| 15D01886                 | 7.0 %    | 295.5 | 0   | 0.018    | 35 | 0.1869 | 0        | 1.493 | 3   | 0.000673 | 0 | 0.0000139 | 0         | 0.000264 | 0   | 0.00101   | 0 | 0.01138 | 0         | 0 | 0   | 0        | 0.43 | 0   | 0        | 0 | 0   | 0         | 0 | 0   | 0    | 0   | 0    | 0   | 0     | 0   |
| 15D01888                 | 7.6 %    | 295.5 | 0   | 0.018    | 35 | 0.1869 | 0        | 1.493 | 3   | 0.000673 | 0 | 0.0000139 | 0         | 0.000264 | 0   | 0.00101   | 0 | 0.01138 | 0         | 0 | 0   | 0        | 0.43 | 0   | 0        | 0 | 0   | 0         | 0 | 0   | 0    | 0   | 0    | 0   | 0     | 0   |
| 15D01889                 | 8.4 %    | 295.5 | 0   | 0.018    | 35 | 0.1869 | 0        | 1.493 | 3   | 0.000673 | 0 | 0.0000139 | 0         | 0.000264 | 0   | 0.00101   | 0 | 0.01138 | 0         | 0 | 0   | 0        | 0.43 | 0   | 0        | 0 | 0   | 0         | 0 | 0   | 0    | 0   | 0    | 0   | 0     | 0   |
| 15D01890                 | 9.4 %    | 295.5 | 0   | 0.018    | 35 | 0.1869 | 0        | 1.493 | 3   | 0.000673 | 0 | 0.0000139 | 0         | 0.000264 | 0   | 0.00101   | 0 | 0.01138 | 0         | 0 | 0   | 0        | 0.43 | 0   | 0        | 0 | 0   | 0         | 0 | 0   | 0    | 0   | 0    | 0   | 0     | 0   |
| 15D01892                 | 10.5 %   | 295.5 | 0   | 0.018    | 35 | 0.1869 | 0        | 1.493 | 3   | 0.000673 | 0 | 0.0000139 | 0         | 0.000264 | 0   | 0.00101   | 0 | 0.01138 | 0         | 0 | 0   | 0        | 0.43 | 0   | 0        | 0 | 0   | 0         | 0 | 0   | 0    | 0   | 0    | 0   | 0     | 0   |
| 15D01893                 | 11.7 %   | 295.5 | 0   | 0.018    | 35 | 0.1869 | 0        | 1.493 | 3   | 0.000673 | 0 | 0.0000139 | 0         | 0.000264 | 0   | 0.00101   | 0 | 0.01138 | 0         | 0 | 0   | 0        | 0.43 | 0   | 0        | 0 | 0   | 0         | 0 | 0   | 0    | 0   | 0    | 0   | 0     | 0   |
| 15D01894                 | 13.1 %   | 295.5 | 0   | 0.018    | 35 | 0.1869 | 0        | 1.493 | 3   | 0.000673 | 0 | 0.0000139 | 0         | 0.000264 | 0   | 0.00101   | 0 | 0.01138 | 0         | 0 | 0   | 0        | 0.43 | 0   | 0        | 0 | 0   | 0         | 0 | 0   | 0    | 0   | 0    | 0   | 0     | 0   |
| 15D01896                 | 14.7 %   | 295.5 | 0   | 0.018    | 35 | 0.1869 | 0        | 1.493 | 3   | 0.000673 | 0 | 0.0000139 | 0         | 0.000264 | 0   | 0.00101   | 0 | 0.01138 | 0         | 0 | 0   | 0        | 0.43 | 0   | 0        | 0 | 0   | 0         | 0 | 0   | 0    | 0   | 0    | 0   | 0     | 0   |
| 15D01897                 | 16.5 %   | 295.5 | 0   | 0.018    | 35 | 0.1869 | 0        | 1.493 | 3   | 0.000673 | 0 | 0.0000139 | 0         | 0.000264 | 0   | 0.00101   | 0 | 0.01138 | 0         | 0 | 0   | 0        | 0.43 | 0   | 0        | 0 | 0   | 0         | 0 | 0   | 0    | 0   | 0    | 0   | 0     | 0   |
| 15D01898                 | 18.3 %   | 295.5 | 0   | 0.018    | 35 | 0.1869 | 0        | 1.493 | 3   | 0.000673 | 0 | 0.0000139 | 0         | 0.000264 | 0   | 0.00101   | 0 | 0.01138 | 0         | 0 | 0   | 0        | 0.43 | 0   | 0        | 0 | 0   | 0         | 0 | 0   | 0    | 0   | 0    | 0   | 0     | 0   |
| 15D01900                 | 20.2 %   | 295.5 | 0   | 0.018    | 35 | 0.1869 | 0        | 1.493 | 3   | 0.000673 | 0 | 0.0000139 | 0         | 0.000264 | 0   | 0.00101   | 0 | 0.01138 | 0         | 0 | 0   | 0        | 0.43 | 0   | 0        | 0 | 0   | 0         | 0 | 0   | 0    | 0   | 0    | 0   | 0     | 0   |
| 15D01901                 | 22.2 %   | 295.5 | 0   | 0.018    | 35 | 0.1869 | 0        | 1.493 | 3   | 0.000673 | 0 | 0.0000139 | 0         | 0.000264 | 0   | 0.00101   | 0 | 0.01138 | 0         | 0 | 0   | 0        | 0.43 | 0   | 0        | 0 | 0   | 0         | 0 | 0   | 0    | 0   | 0    | 0   | 0     | 0   |
| 15D01903                 | 24.5 %   | 295.5 | 0   | 0.018    | 35 | 0.1869 | 0        | 1.493 | 3   | 0.000673 | 0 | 0.0000139 | 0         | 0.000264 | 0   | 0.00101   | 0 | 0.01138 | 0         | 0 | 0   | 0        | 0.43 | 0   | 0        | 0 | 0   | 0         | 0 | 0   | 0    | 0   | 0    | 0   | 0     | 0   |



15D01852.AGE >>> 203-1 >>> KERGUELEN | FALLOON (14-PIL-01) PROJECT

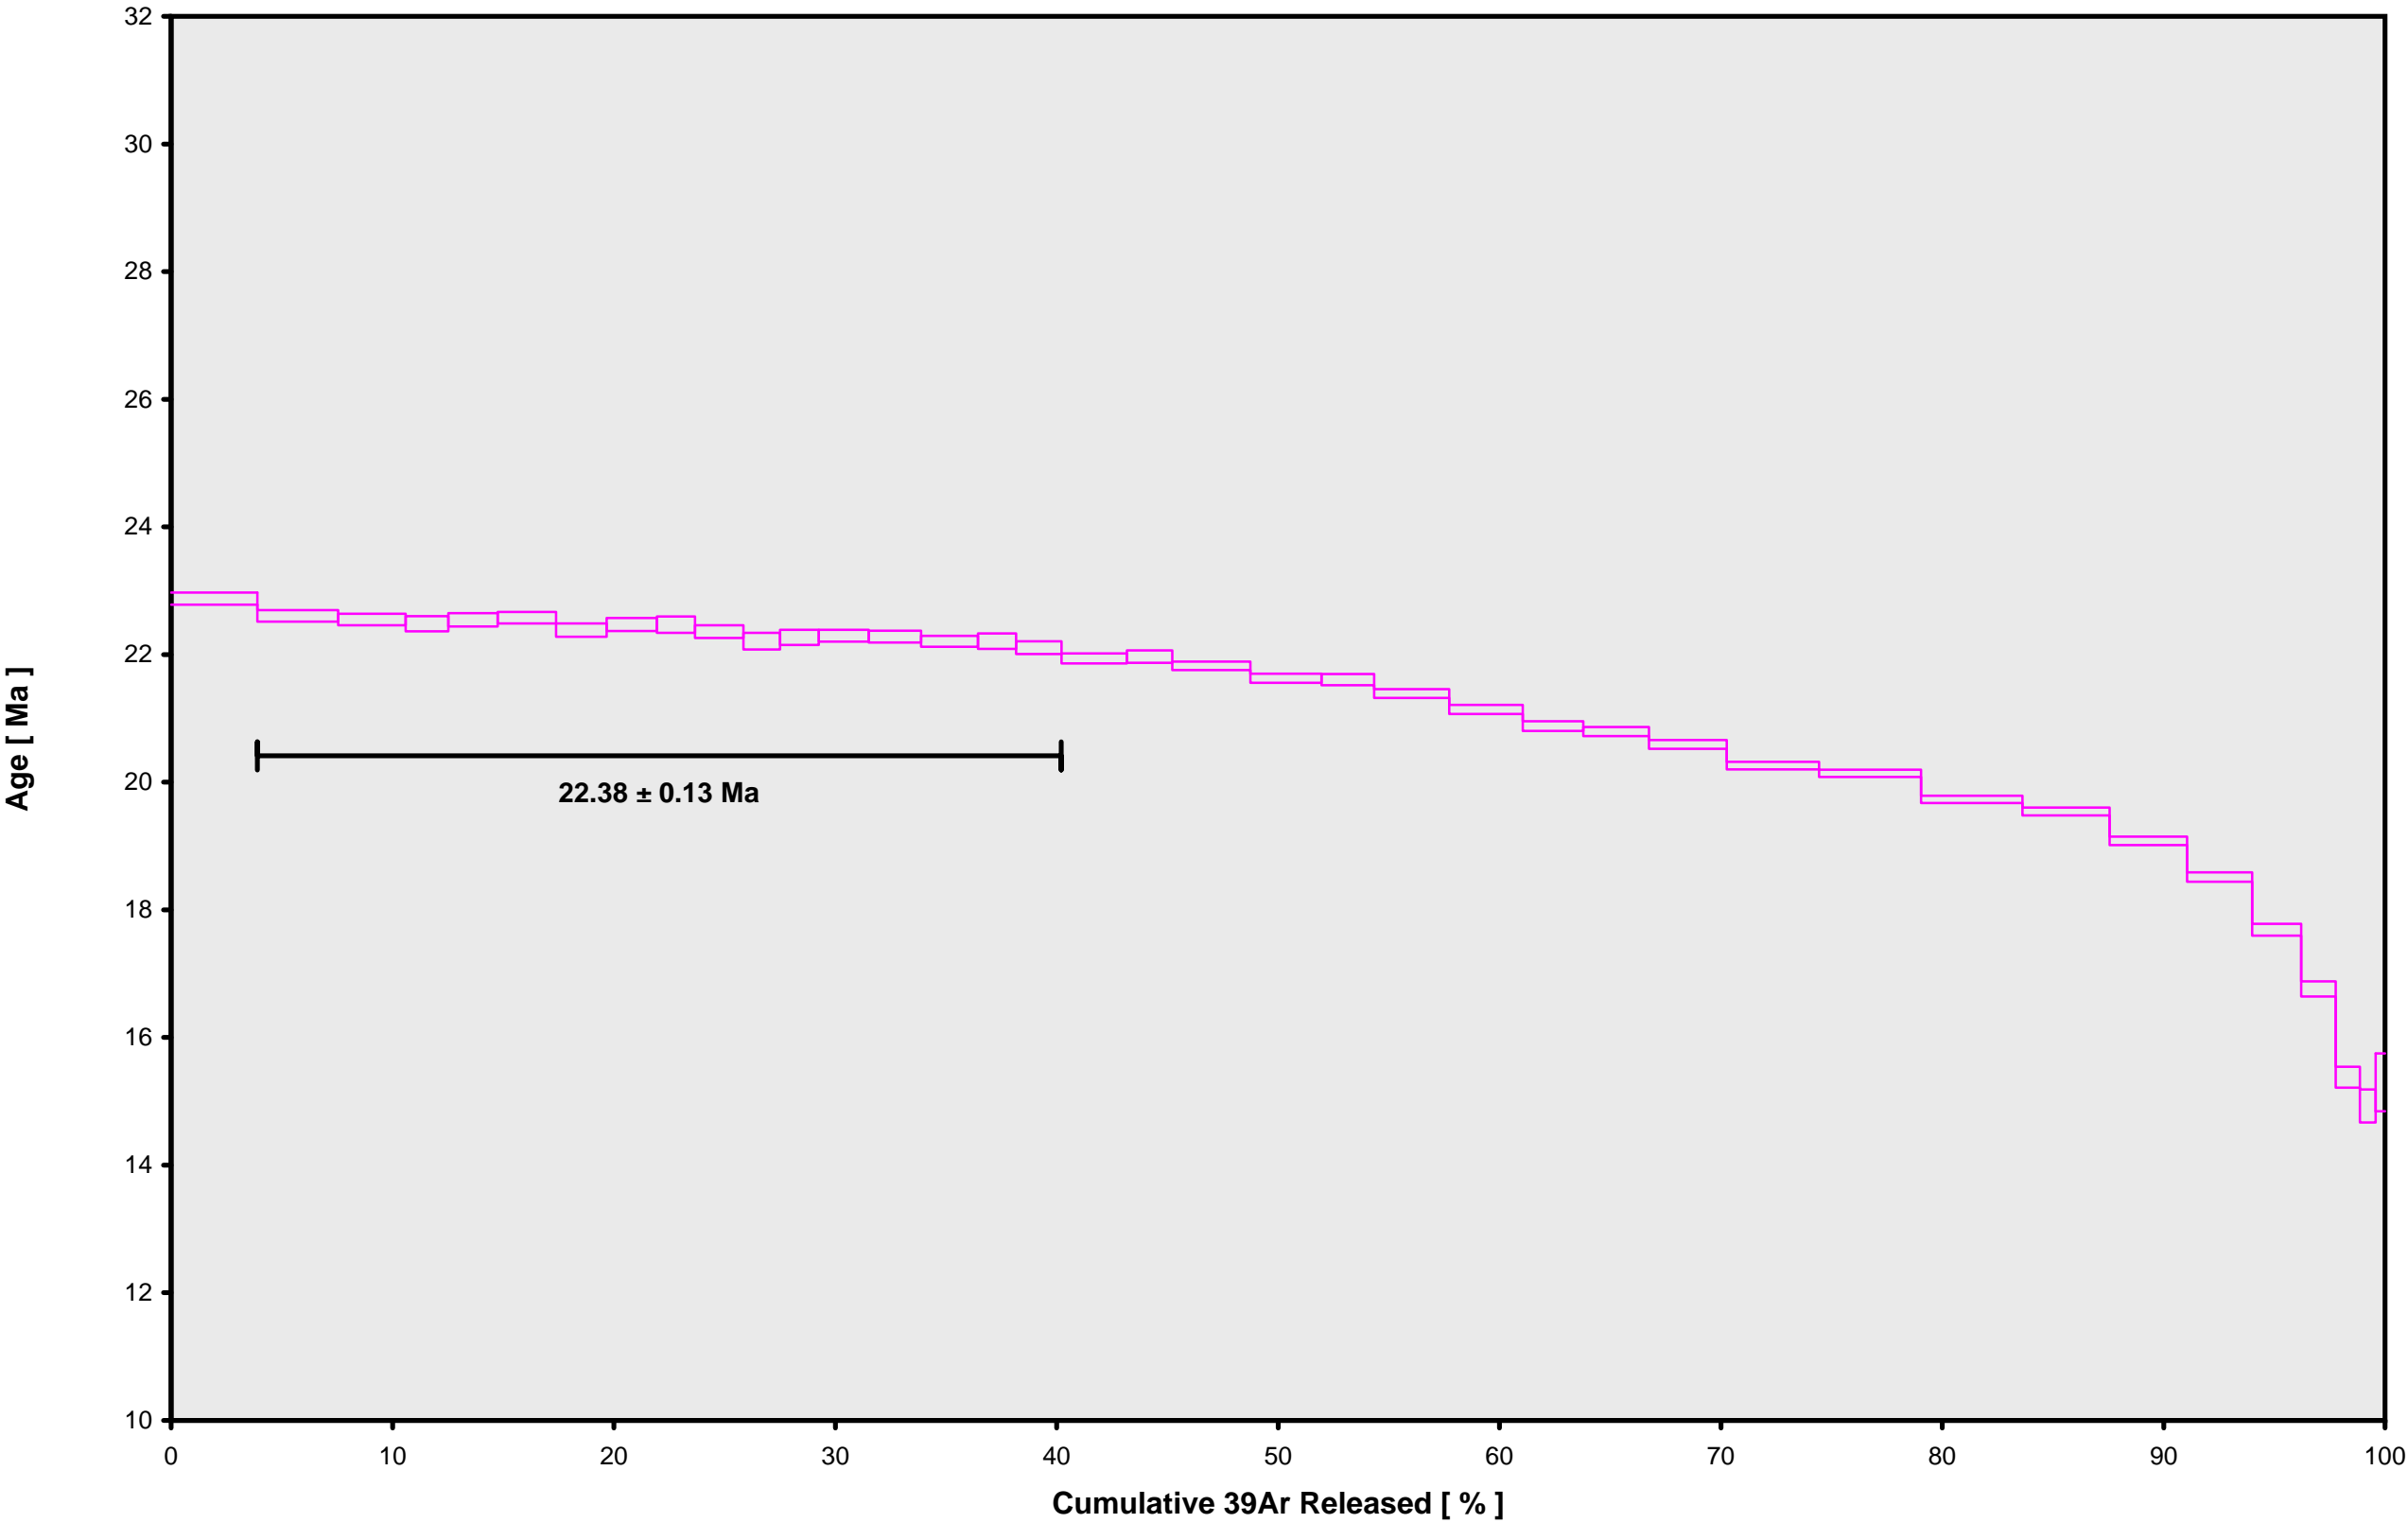

Ar-Ages in Ma

WEIGHTED PLATEAU

22.38 ± 0.13

TOTAL FUSION

21.09 ± 0.10

NORMAL ISOCHRON

21.96 ± 0.16

INVERSE ISOCHRON

21.96 ± 0.16

MSWD (PROBABILITY)

9.76 (0%)

Sample Info

Groundmass

Kerguelen Plateau

Dan Miggins

IRR = 14-OSU-06 (6C12-14)

J = 0.00175976 ± 0.00000421



15D01852.AGE >>> 203-1 >>> KERGUELEN | FALLOON (14-PIL-01) PROJECT

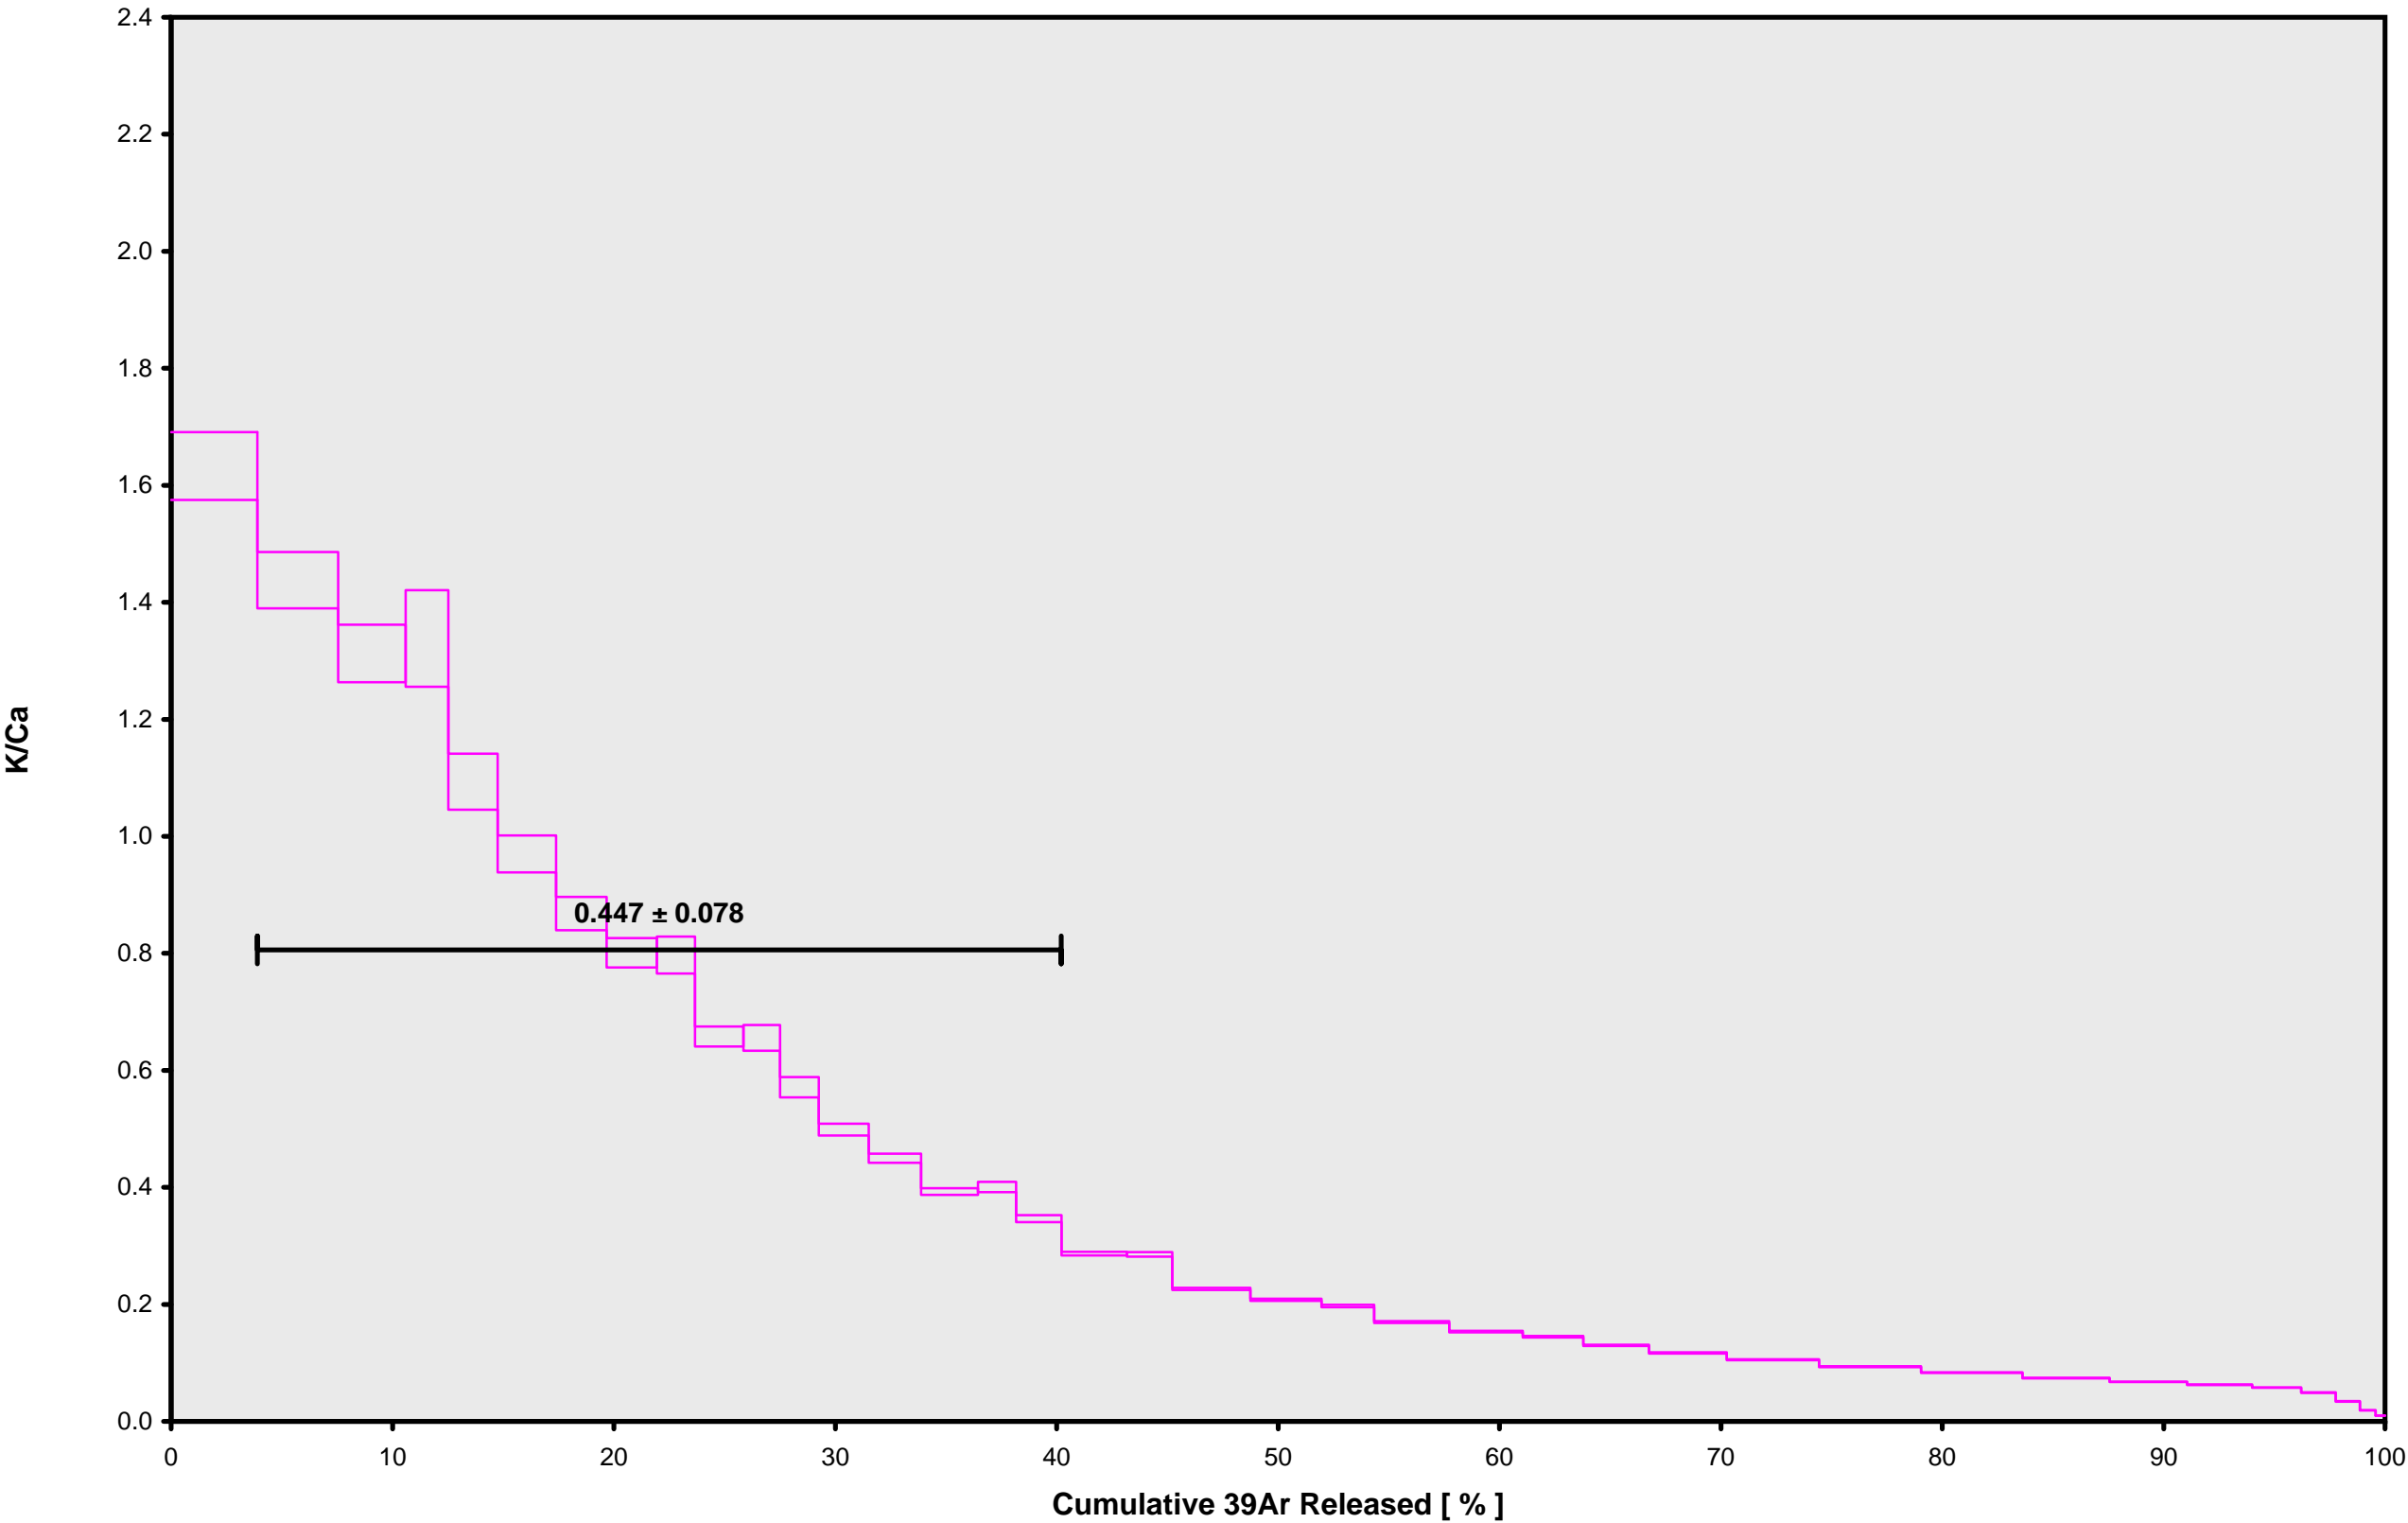

**Ar-Ages in Ma**

**WEIGHTED PLATEAU**

22.38 ± 0.13

**TOTAL FUSION**

21.09 ± 0.10

**NORMAL ISOCHRON**

21.96 ± 0.16

**INVERSE ISOCHRON**

21.96 ± 0.16

**Sample Info**

Groundmass

Kerguelen Plateau

Dan Miggins

IRR = 14-OSU-06 (6C12-14)

J = 0.00175976 ± 0.00000421



15D01852.AGE >>> 203-1 >>> KERGUELEN | FALLOON (14-PIL-01) PROJECT

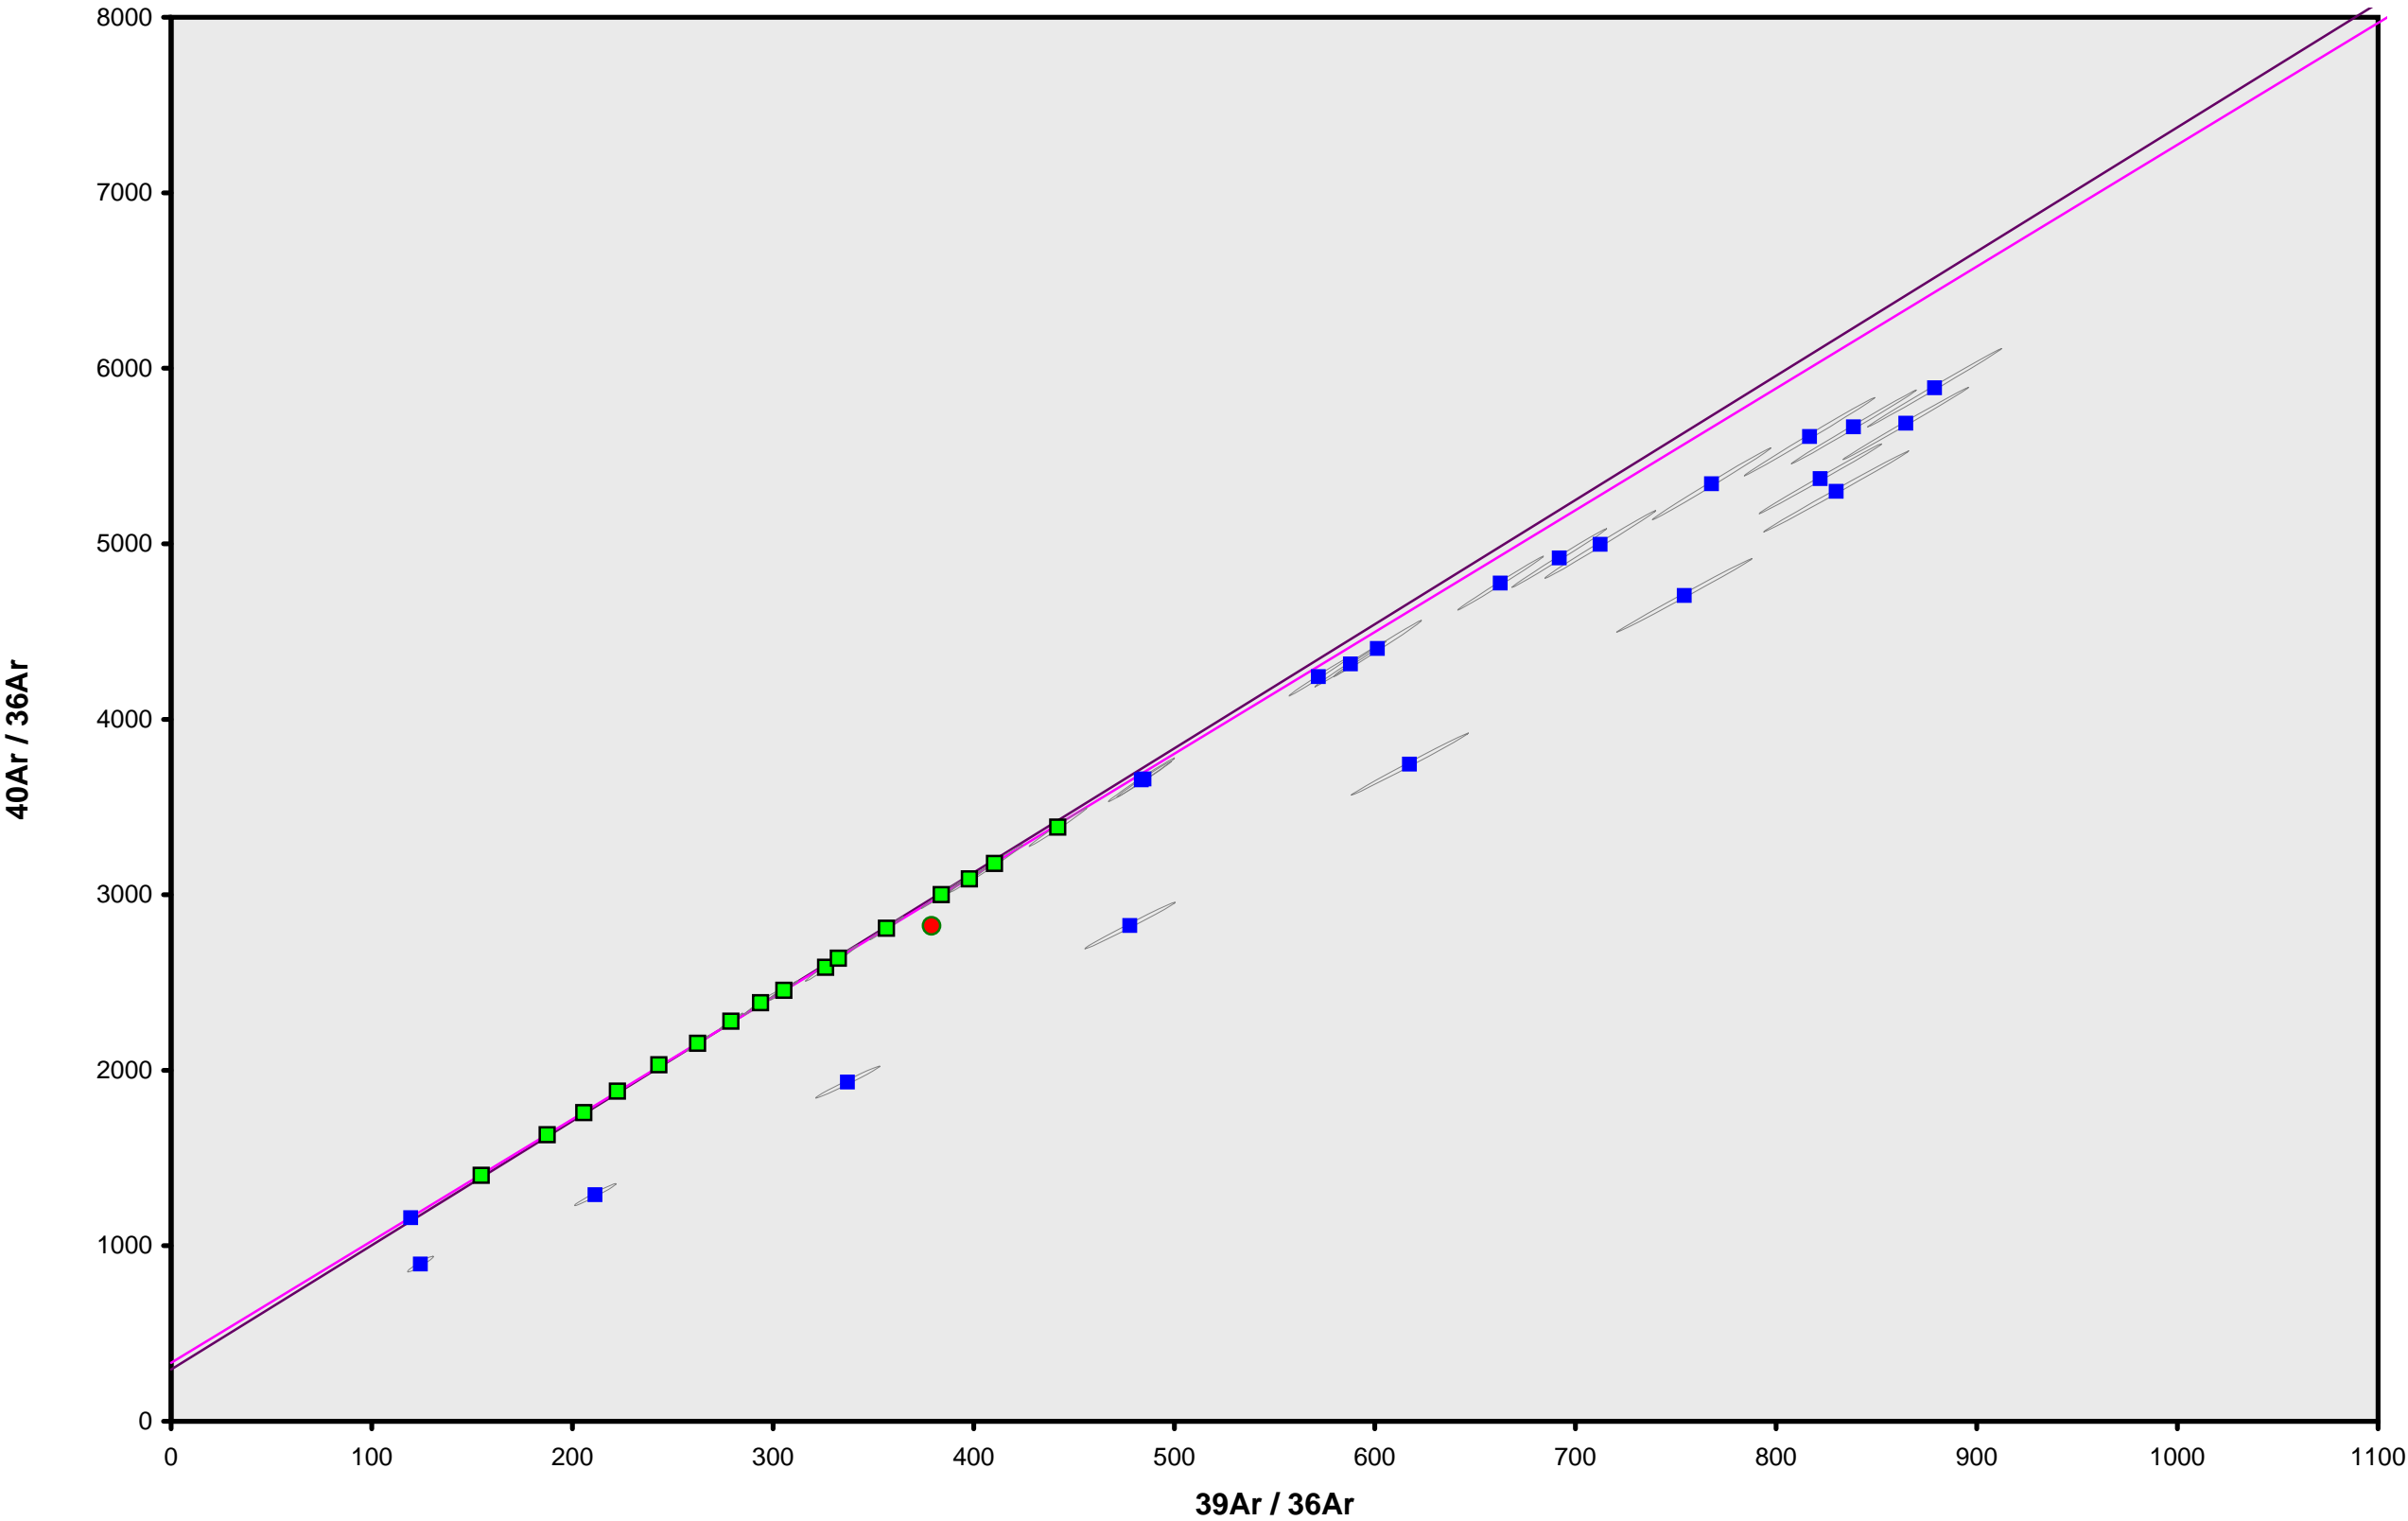

Ar-Ages in Ma

WEIGHTED PLATEAU

$22.38 \pm 0.13$

TOTAL FUSION

$21.09 \pm 0.10$

NORMAL ISOCHRON

$21.96 \pm 0.16$

INVERSE ISOCHRON

$21.96 \pm 0.16$

MSWD (PROBABILITY)

2.16 (1%)

40AR/36AR INTERCEPT

$332.2 \pm 10.4$

Sample Info

Groundmass

Kerguelen Plateau

Dan Miggins

IRR = 14-OSU-06 (6C12-14)

J =  $0.00175976 \pm 0.00000421$



15D01852.AGE >>> 203-1 >>> KERGUELEN | FALLOON (14-PIL-01) PROJECT

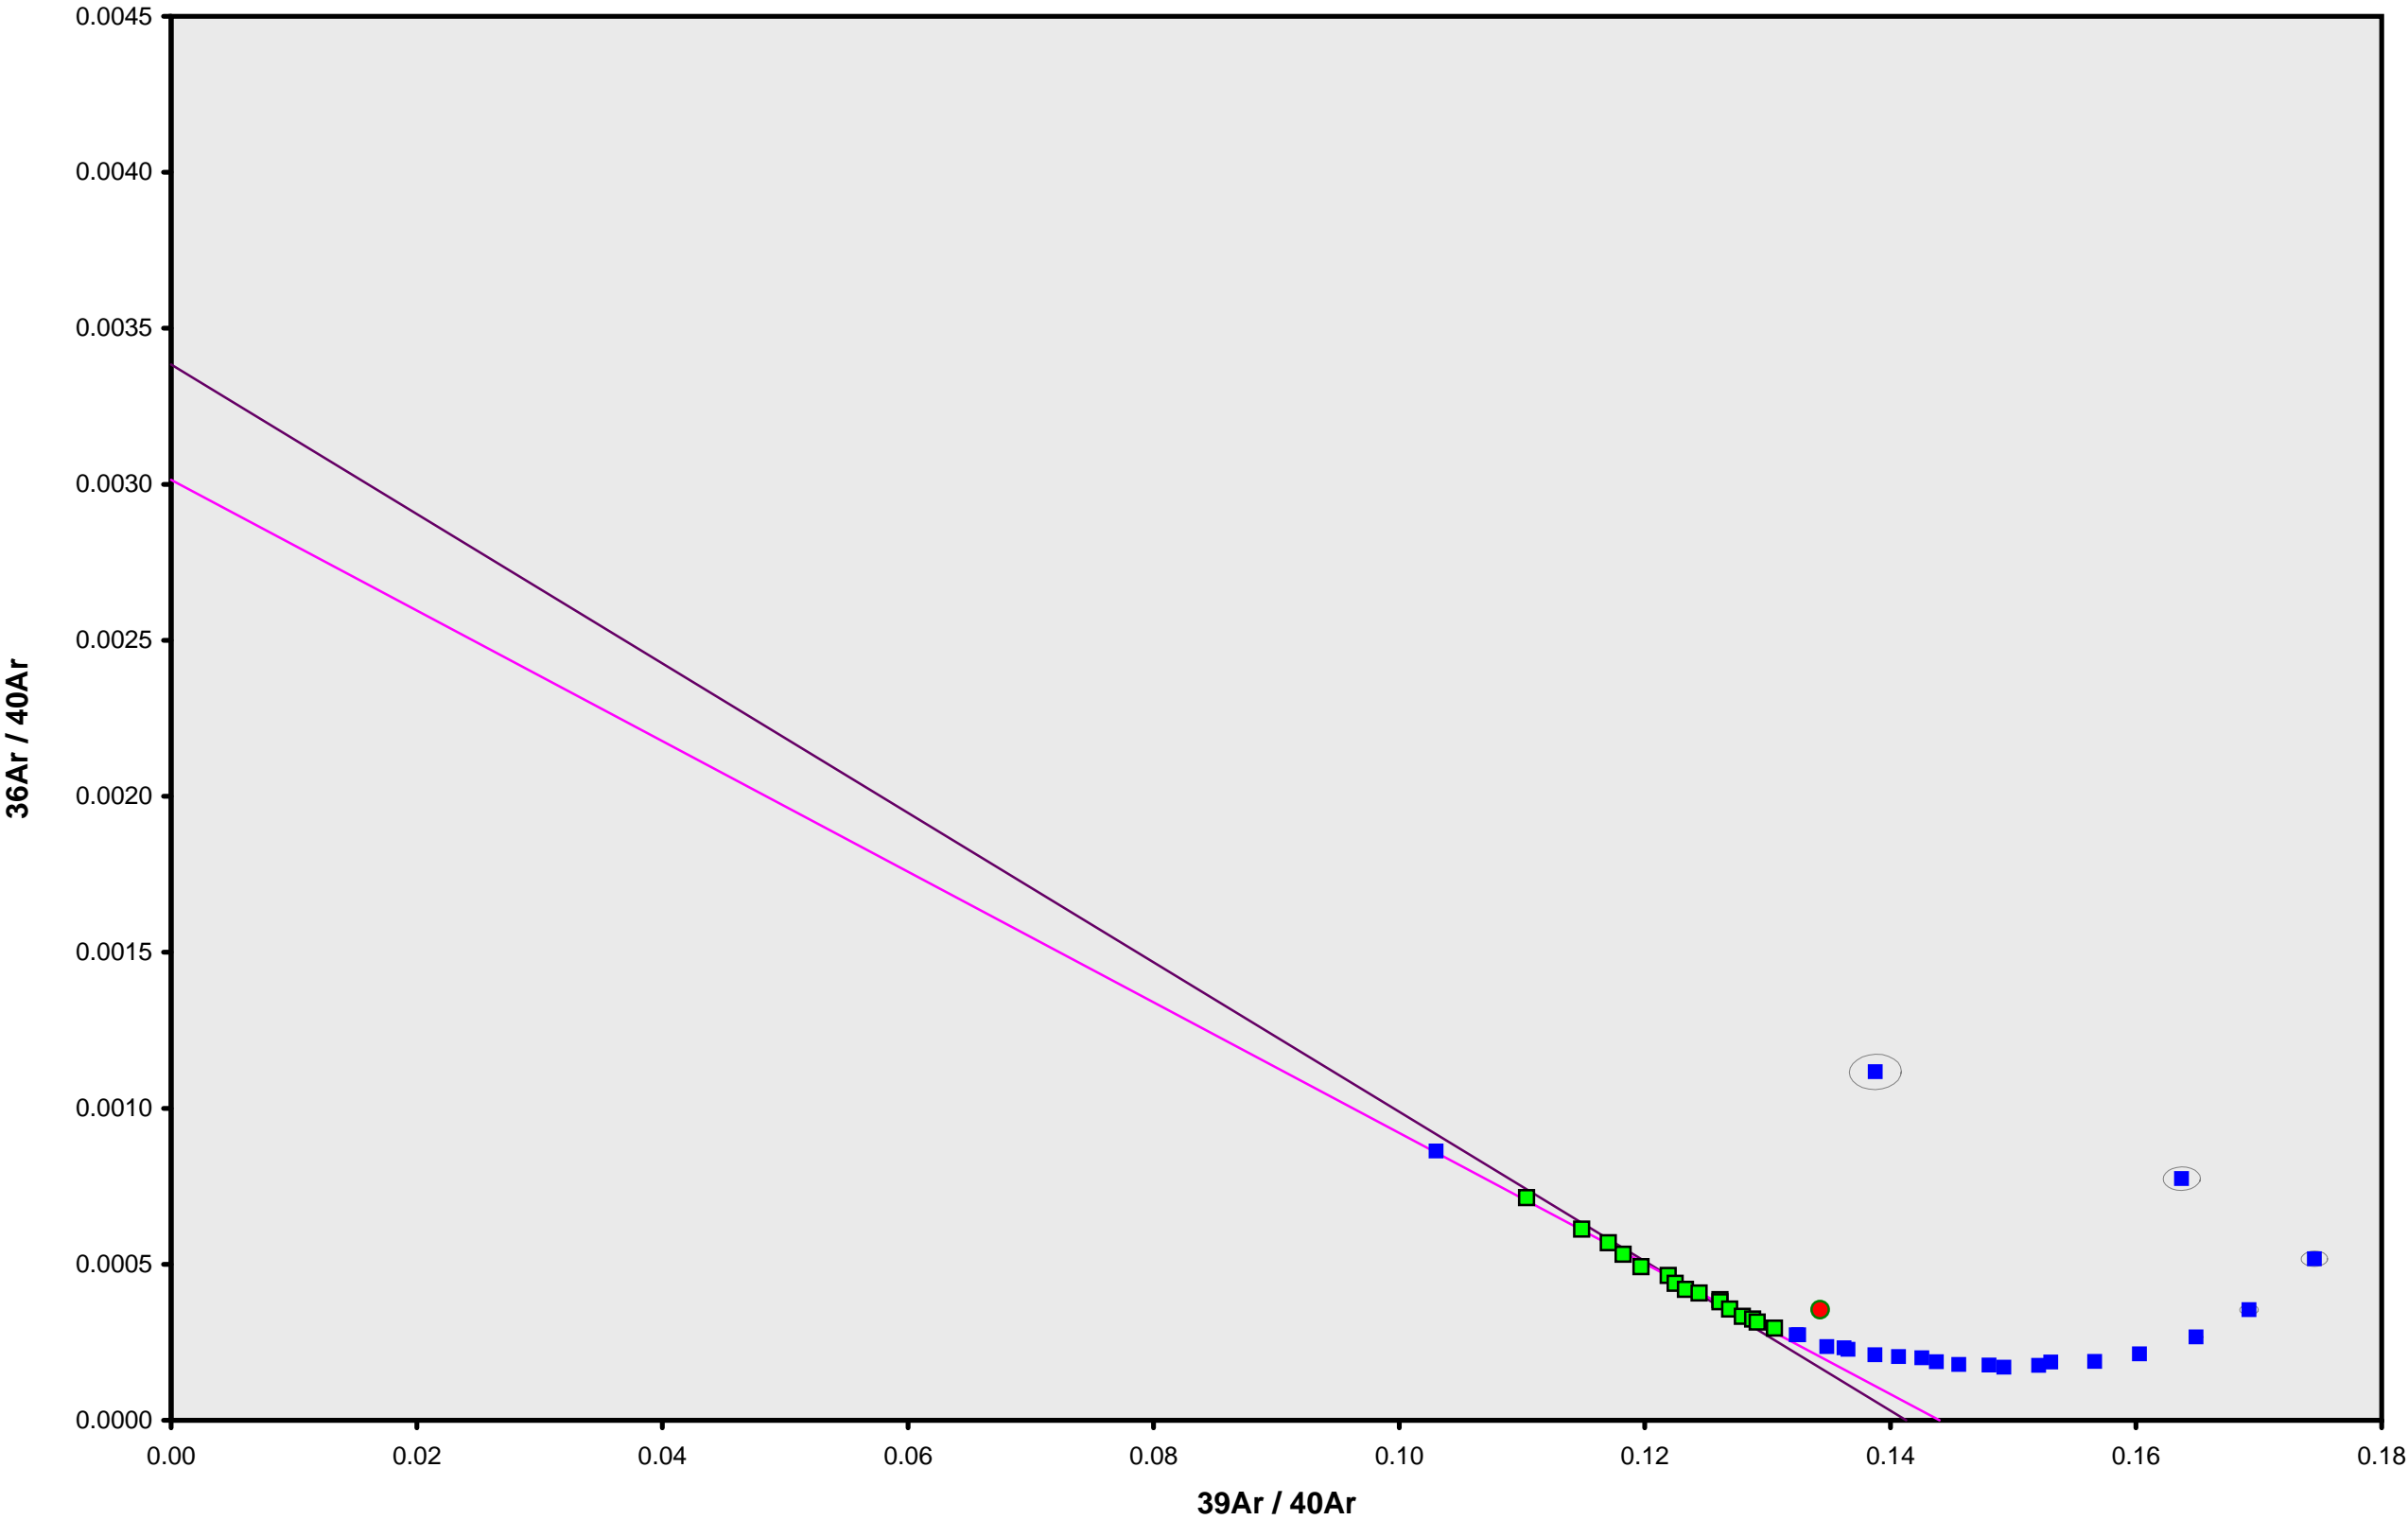

Ar-Ages in Ma

WEIGHTED PLATEAU

22.38 ± 0.13

TOTAL FUSION

21.09 ± 0.10

NORMAL ISOCHRON

21.96 ± 0.16

INVERSE ISOCHRON

21.96 ± 0.16

MSWD (PROBABILITY)

2.17 (1%)

SPREADING FACTOR

14.0%

40AR/36AR INTERCEPT

331.7 ± 10.5

Sample Info

Groundmass

Kerguelen Plateau

Dan Miggins

IRR = 14-OSU-06 (6C12-14)

J = 0.00175976 ± 0.00000421



| Incremental Heating |        |   | 36Ar(a)<br>[fA] | 37Ar(ca)<br>[fA] | 38Ar(cl)<br>[fA] | 39Ar(k)<br>[fA] | 40Ar(r)<br>[fA] | Age ± 2σ<br>(Ma) | 40Ar(r)<br>(%) | 39Ar(k)<br>(%) | K/Ca ± 2σ     |
|---------------------|--------|---|-----------------|------------------|------------------|-----------------|-----------------|------------------|----------------|----------------|---------------|
| 15D00233            | 1.9 %  | ✓ | 0.1966552       | 26.1815          | 1.799595         | 87.2699         | 533.340         | 19.02 ± 0.05     | 90.16          | 4.06           | 1.433 ± 0.024 |
| 15D00234            | 2.0 %  | ✓ | 0.1848087       | 26.6795          | 1.852725         | 90.7241         | 554.165         | 19.01 ± 0.04     | 91.02          | 4.22           | 1.462 ± 0.024 |
| 15D00236            | 2.1 %  | ✓ | 0.1840160       | 27.0988          | 1.852322         | 91.2445         | 556.151         | 18.97 ± 0.04     | 91.08          | 4.25           | 1.448 ± 0.023 |
| 15D00237            | 2.2 %  | ✓ | 0.1751084       | 25.2043          | 1.810166         | 85.8549         | 522.462         | 18.94 ± 0.05     | 90.97          | 4.00           | 1.465 ± 0.025 |
| 15D00238            | 2.3 %  | ✓ | 0.1682995       | 24.8142          | 1.775506         | 83.6653         | 508.554         | 18.92 ± 0.05     | 91.08          | 3.90           | 1.450 ± 0.025 |
| 15D00240            | 2.4 %  | ✓ | 0.1914996       | 27.8689          | 2.000254         | 94.8928         | 576.257         | 18.90 ± 0.04     | 91.04          | 4.42           | 1.464 ± 0.023 |
| 15D00241            | 2.5 %  | ✓ | 0.1669399       | 25.1155          | 1.772798         | 83.7748         | 507.997         | 18.87 ± 0.05     | 91.13          | 3.90           | 1.434 ± 0.025 |
| 15D00242            | 2.6 %  | ✓ | 0.1747694       | 26.4680          | 1.869955         | 88.4972         | 534.022         | 18.78 ± 0.04     | 91.17          | 4.12           | 1.438 ± 0.023 |
| 15D00244            | 2.7 %  | ✓ | 0.1690682       | 26.4063          | 1.849347         | 87.4981         | 526.230         | 18.72 ± 0.05     | 91.32          | 4.07           | 1.425 ± 0.024 |
| 15D00245            | 2.8 %  | ✓ | 0.1628180       | 25.3518          | 1.823089         | 83.7270         | 500.731         | 18.62 ± 0.05     | 91.22          | 3.90           | 1.420 ± 0.024 |
| 15D00246            | 2.9 %  | ✓ | 0.1595041       | 25.1840          | 1.786305         | 82.1417         | 488.617         | 18.52 ± 0.05     | 91.19          | 3.83           | 1.403 ± 0.024 |
| 15D00248            | 3.0 %  | ✓ | 0.1764699       | 28.9535          | 1.979503         | 92.3788         | 542.365         | 18.28 ± 0.04     | 91.21          | 4.30           | 1.372 ± 0.021 |
| 15D00249            | 3.2 %  | ✓ | 0.2339470       | 40.0723          | 2.823194         | 127.6496        | 731.044         | 17.83 ± 0.04     | 91.35          | 5.94           | 1.370 ± 0.016 |
| 15D00250            | 3.4 %  | ✓ | 0.1915651       | 33.3603          | 2.306419         | 104.1639        | 593.288         | 17.73 ± 0.04     | 91.27          | 4.85           | 1.343 ± 0.018 |
| 15D00252            | 3.6 %  | ✓ | 0.1961103       | 36.0802          | 2.458232         | 109.8512        | 618.047         | 17.52 ± 0.04     | 91.41          | 5.12           | 1.309 ± 0.017 |
| 15D00253            | 3.8 %  | ✓ | 0.1169329       | 21.4289          | 1.473143         | 65.6796         | 372.143         | 17.64 ± 0.05     | 91.49          | 3.06           | 1.318 ± 0.026 |
| 15D00254            | 4.0 %  | ✓ | 0.1531240       | 29.0487          | 2.008392         | 87.4520         | 481.794         | 17.16 ± 0.04     | 91.40          | 4.07           | 1.295 ± 0.019 |
| 15D00256            | 4.3 %  | ✓ | 0.1120989       | 22.4908          | 1.477913         | 66.0491         | 359.341         | 16.94 ± 0.05     | 91.54          | 3.08           | 1.263 ± 0.024 |
| 15D00257            | 4.6 %  | ✓ | 0.1317846       | 28.2456          | 1.895761         | 81.8838         | 416.056         | 15.83 ± 0.04     | 91.42          | 3.81           | 1.247 ± 0.019 |
| 15D00258            | 4.9 %  | ✓ | 0.1043900       | 23.3696          | 1.562276         | 67.5011         | 330.275         | 15.24 ± 0.05     | 91.44          | 3.14           | 1.242 ± 0.023 |
| 15D00260            | 5.2 %  | ✓ | 0.0868937       | 21.6147          | 1.401777         | 61.0305         | 275.689         | 14.08 ± 0.05     | 91.46          | 2.84           | 1.214 ± 0.024 |
| 15D00261            | 5.5 %  | ✓ | 0.0707448       | 19.7853          | 1.243924         | 55.1853         | 221.939         | 12.54 ± 0.05     | 91.37          | 2.57           | 1.199 ± 0.025 |
| 15D00262            | 5.8 %  | ✓ | 0.0529733       | 16.8793          | 1.015606         | 45.7320         | 166.951         | 11.39 ± 0.05     | 91.40          | 2.13           | 1.165 ± 0.030 |
| 15D00264            | 6.1 %  | ✓ | 0.0388363       | 14.3667          | 0.824680         | 38.6505         | 124.429         | 10.05 ± 0.06     | 91.53          | 1.80           | 1.157 ± 0.033 |
| 15D00265            | 6.5 %  | ✓ | 0.0281897       | 11.4308          | 0.597314         | 29.7047         | 85.040          | 8.94 ± 0.07      | 91.05          | 1.38           | 1.117 ± 0.040 |
| 15D00266            | 7.0 %  | ✓ | 0.0237820       | 14.1638          | 0.641624         | 36.4308         | 73.220          | 6.28 ± 0.06      | 91.20          | 1.70           | 1.106 ± 0.032 |
| 15D00268            | 7.6 %  | ✓ | 0.0141913       | 8.1561           | 0.368550         | 20.1279         | 43.609          | 6.77 ± 0.11      | 91.19          | 0.94           | 1.061 ± 0.054 |
| 15D00269            | 8.4 %  | ✓ | 0.0126019       | 12.7179          | 0.344006         | 26.4446         | 34.936          | 4.13 ± 0.08      | 90.31          | 1.23           | 0.894 ± 0.029 |
| 15D00270            | 9.4 %  | ✓ | 0.0077423       | 13.4945          | 0.221878         | 17.5436         | 21.694          | 3.86 ± 0.12      | 90.39          | 0.82           | 0.559 ± 0.018 |
| 15D00272            | 10.5 % | ✓ | 0.0062852       | 25.4063          | 0.111211         | 14.5652         | 12.639          | 2.71 ± 0.13      | 87.10          | 0.68           | 0.247 ± 0.004 |
| 15D00273            | 11.7 % | ✓ | 0.0067859       | 52.3039          | 0.120435         | 12.7307         | 8.134           | 2.00 ± 0.16      | 80.12          | 0.59           | 0.105 ± 0.001 |
| 15D00274            | 13.1 % | ✓ | 0.0068307       | 68.2659          | 0.084528         | 8.3817          | 4.263           | 1.59 ± 0.24      | 67.77          | 0.39           | 0.053 ± 0.001 |
| 15D00276            | 14.7 % | ✓ | 0.0069729       | 114.2937         | 0.097687         | 6.2319          | 2.968           | 1.49 ± 0.35      | 58.95          | 0.29           | 0.023 ± 0.000 |
| 15D00277            | 16.5 % | ✓ | 0.0099672       | 162.4325         | 0.034473         | 4.3081          | 2.047           | 1.49 ± 0.52      | 40.97          | 0.20           | 0.011 ± 0.000 |
| 15D00278            | 18.3 % | ✓ | 0.0078112       | 140.3645         | 0.075634         | 2.3221          | 1.234           | 1.66 ± 0.93      | 34.82          | 0.11           | 0.007 ± 0.000 |
| 15D00280            | 20.2 % | ✓ | 0.0113127       | 236.1813         | 0.067382         | 2.4064          | 1.289           | 1.68 ± 0.95      | 27.82          | 0.11           | 0.004 ± 0.000 |
| 15D00281            | 22.2 % | ✓ | 0.0094149       | 188.6925         | 0.015211         | 1.7557          | 1.249           | 2.23 ± 1.21      | 30.98          | 0.08           | 0.004 ± 0.000 |
| 15D00283            | 24.5 % | ✓ | 0.0136150       | 307.2412         | 0.128210         | 2.0390          | 1.663           | 2.55 ± 1.22      | 29.24          | 0.09           | 0.003 ± 0.000 |

Σ 3.7648609 1977.2136 45.571026 2147.4902 11335.872

| Information on Analysis                                                                                                                                                                                                                                                                 | Results                   | 40(r)/39(k) ± 2σ             | Age ± 2σ<br>(Ma)                                      | MSWD         | 39Ar(k)<br>(%,n)                           | K/Ca ± 2σ     |
|-----------------------------------------------------------------------------------------------------------------------------------------------------------------------------------------------------------------------------------------------------------------------------------------|---------------------------|------------------------------|-------------------------------------------------------|--------------|--------------------------------------------|---------------|
| Sample = CAPTAINS SAMPLE<br>Material = Groundmass<br>Location = Kerguelen Plateau<br>Analyst = Anthony Koppers<br>Project = KERGUELEN   FALLOON (14-<br>Mass Discrimination Law = LIN<br>Irradiation = 14-OSU-06 (6C15-14)<br>J = 0.00173028 ± 0.00000443<br>FCT-NM = 28.201 ± 0.023 Ma | Age Plateau<br>Error Mean | 5.27240 ± 0.40315<br>± 7.65% | 16.42 ± 1.25<br>± 7.63%                               | > 100<br>0%  | 100.00<br>38                               | 0.007 ± 0.007 |
|                                                                                                                                                                                                                                                                                         |                           |                              | Full External Error ± 1.31<br>Analytical Error ± 1.25 | 1.46<br>> 10 | 2σ Confidence Limit<br>Error Magnification |               |
|                                                                                                                                                                                                                                                                                         | Total Fusion Age          | 5.27866 ± 0.00300<br>± 0.06% | 16.44 ± 0.08<br>± 0.51%                               |              | 38                                         | 0.467 ± 0.001 |
|                                                                                                                                                                                                                                                                                         |                           |                              | Full External Error ± 0.38<br>Analytical Error ± 0.01 |              |                                            |               |



| Normal Isochron |        |   | 39(k)/36(a) ± 2σ | 40(a+r)/36(a) ± 2σ | r.i.   |
|-----------------|--------|---|------------------|--------------------|--------|
| 15D00233        | 1.9 %  | ✓ | 443.77 ± 7.29    | 3007.56 ± 49.15    | 0.9945 |
| 15D00234        | 2.0 %  | ✓ | 490.91 ± 8.09    | 3294.08 ± 53.99    | 0.9944 |
| 15D00236        | 2.1 %  | ✓ | 495.85 ± 8.13    | 3317.79 ± 54.13    | 0.9946 |
| 15D00237        | 2.2 %  | ✓ | 490.30 ± 8.52    | 3279.15 ± 56.70    | 0.9949 |
| 15D00238        | 2.3 %  | ✓ | 497.12 ± 8.96    | 3317.22 ± 59.54    | 0.9953 |
| 15D00240        | 2.4 %  | ✓ | 495.52 ± 7.89    | 3304.68 ± 52.37    | 0.9945 |
| 15D00241        | 2.5 %  | ✓ | 501.83 ± 9.57    | 3338.50 ± 63.46    | 0.9958 |
| 15D00242        | 2.6 %  | ✓ | 506.37 ± 8.70    | 3351.08 ± 57.35    | 0.9950 |
| 15D00244        | 2.7 %  | ✓ | 517.53 ± 9.11    | 3408.03 ± 59.74    | 0.9951 |
| 15D00245        | 2.8 %  | ✓ | 514.24 ± 8.96    | 3370.90 ± 58.45    | 0.9949 |
| 15D00246        | 2.9 %  | ✓ | 514.98 ± 10.26   | 3358.85 ± 66.65    | 0.9958 |
| 15D00248        | 3.0 %  | ✓ | 523.48 ± 8.62    | 3368.91 ± 55.17    | 0.9945 |
| 15D00249        | 3.2 %  | ✓ | 545.63 ± 8.06    | 3420.33 ± 50.25    | 0.9944 |
| 15D00250        | 3.4 %  | ✓ | 543.75 ± 8.87    | 3392.56 ± 55.11    | 0.9949 |
| 15D00252        | 3.6 %  | ✓ | 560.15 ± 9.16    | 3447.03 ± 56.11    | 0.9950 |
| 15D00253        | 3.8 %  | ✓ | 561.69 ± 13.38   | 3478.04 ± 82.61    | 0.9967 |
| 15D00254        | 4.0 %  | ✓ | 571.12 ± 11.34   | 3441.93 ± 68.13    | 0.9963 |
| 15D00256        | 4.3 %  | ✓ | 589.20 ± 14.32   | 3501.07 ± 84.88    | 0.9968 |
| 15D00257        | 4.6 %  | ✓ | 621.35 ± 13.77   | 3452.59 ± 76.28    | 0.9968 |
| 15D00258        | 4.9 %  | ✓ | 646.62 ± 16.41   | 3459.36 ± 87.57    | 0.9971 |
| 15D00260        | 5.2 %  | ✓ | 702.36 ± 21.05   | 3468.22 ± 103.76   | 0.9978 |
| 15D00261        | 5.5 %  | ✓ | 780.06 ± 25.94   | 3432.68 ± 113.96   | 0.9977 |
| 15D00262        | 5.8 %  | ✓ | 863.30 ± 36.53   | 3447.10 ± 145.72   | 0.9983 |
| 15D00264        | 6.1 %  | ✓ | 995.21 ± 57.88   | 3499.44 ± 203.40   | 0.9988 |
| 15D00265        | 6.5 %  | ✓ | 1053.74 ± 79.79  | 3312.19 ± 250.75   | 0.9989 |
| 15D00266        | 7.0 %  | ✓ | 1531.86 ± 134.03 | 3374.28 ± 295.23   | 0.9992 |
| 15D00268        | 7.6 %  | ✓ | 1418.33 ± 211.25 | 3368.44 ± 501.74   | 0.9992 |
| 15D00269        | 8.4 %  | ✓ | 2098.46 ± 334.61 | 3067.76 ± 489.34   | 0.9993 |
| 15D00270        | 9.4 %  | ✓ | 2265.94 ± 601.15 | 3097.47 ± 822.05   | 0.9994 |
| 15D00272        | 10.5 % | ✓ | 2317.37 ± 732.59 | 2306.40 ± 729.72   | 0.9989 |
| 15D00273        | 11.7 % | ✓ | 1876.05 ± 577.67 | 1494.14 ± 460.95   | 0.9977 |
| 15D00274        | 13.1 % | ✓ | 1227.07 ± 375.56 | 919.56 ± 282.90    | 0.9940 |
| 15D00276        | 14.7 % | ✓ | 893.74 ± 287.59  | 721.12 ± 233.66    | 0.9916 |
| 15D00277        | 16.5 % | ✓ | 432.22 ± 101.80  | 500.91 ± 119.44    | 0.9831 |
| 15D00278        | 18.3 % | ✓ | 297.28 ± 85.54   | 453.54 ± 132.23    | 0.9746 |
| 15D00280        | 20.2 % | ✓ | 212.72 ± 45.26   | 409.46 ± 88.01     | 0.9694 |
| 15D00281        | 22.2 % | ✓ | 186.49 ± 44.03   | 428.20 ± 101.87    | 0.9634 |
| 15D00283        | 24.5 % | ✓ | 149.76 ± 29.18   | 417.68 ± 81.36     | 0.9663 |

| Results                        | 40(a)/36(a) ± 2σ                                                    | 40(r)/39(k) ± 2σ            | Age ± 2σ (Ma)                                                                     | MSWD                                   |
|--------------------------------|---------------------------------------------------------------------|-----------------------------|-----------------------------------------------------------------------------------|----------------------------------------|
| Normal Isochron<br>Error Chron | 14059.41 ± 4207.51 ± 29.93%                                         | 20.67215 ± 7.99997 ± 38.70% | 65.87 ± 25.96 ± 39.42%<br>Full External Error ± 26.01<br>Analytical Error ± 25.96 | > 100<br>0%                            |
| Statistics                     | 2σ Confidence Limit<br>Error Magnification<br>Number of Data Points | 1.47<br>> 10<br>38          | Convergence<br>Number of Iterations<br>Calculated Line                            | 0.000060187242<br>9<br>Weighted York-2 |



| Inverse Isochron |        |   | 39(k)/40(a+r) ± 2σ    | 36(a)/40(a+r) ± 2σ      | r.i.   |
|------------------|--------|---|-----------------------|-------------------------|--------|
| 15D00233         | 1.9 %  | ✓ | 0.1475520 ± 0.0002533 | 0.00033250 ± 0.00000543 | 0.0056 |
| 15D00234         | 2.0 %  | ✓ | 0.1490272 ± 0.0002586 | 0.00030357 ± 0.00000498 | 0.0051 |
| 15D00236         | 2.1 %  | ✓ | 0.1494520 ± 0.0002550 | 0.00030141 ± 0.00000492 | 0.0052 |
| 15D00237         | 2.2 %  | ✓ | 0.1495193 ± 0.0002627 | 0.00030496 ± 0.00000527 | 0.0055 |
| 15D00238         | 2.3 %  | ✓ | 0.1498608 ± 0.0002626 | 0.00030146 ± 0.00000541 | 0.0056 |
| 15D00240         | 2.4 %  | ✓ | 0.1499463 ± 0.0002497 | 0.00030260 ± 0.00000480 | 0.0050 |
| 15D00241         | 2.5 %  | ✓ | 0.1503150 ± 0.0002631 | 0.00029954 ± 0.00000569 | 0.0052 |
| 15D00242         | 2.6 %  | ✓ | 0.1511052 ± 0.0002596 | 0.00029841 ± 0.00000511 | 0.0056 |
| 15D00244         | 2.7 %  | ✓ | 0.1518564 ± 0.0002656 | 0.00029342 ± 0.00000514 | 0.0051 |
| 15D00245         | 2.8 %  | ✓ | 0.1525518 ± 0.0002683 | 0.00029666 ± 0.00000514 | 0.0060 |
| 15D00246         | 2.9 %  | ✓ | 0.1533208 ± 0.0002783 | 0.00029772 ± 0.00000591 | 0.0051 |
| 15D00248         | 3.0 %  | ✓ | 0.1553860 ± 0.0002684 | 0.00029683 ± 0.00000486 | 0.0055 |
| 15D00249         | 3.2 %  | ✓ | 0.1595270 ± 0.0002496 | 0.00029237 ± 0.00000430 | 0.0041 |
| 15D00250         | 3.4 %  | ✓ | 0.1602780 ± 0.0002640 | 0.00029476 ± 0.00000479 | 0.0051 |
| 15D00252         | 3.6 %  | ✓ | 0.1625024 ± 0.0002658 | 0.00029011 ± 0.00000472 | 0.0046 |
| 15D00253         | 3.8 %  | ✓ | 0.1614953 ± 0.0003139 | 0.00028752 ± 0.00000683 | 0.0065 |
| 15D00254         | 4.0 %  | ✓ | 0.1659297 ± 0.0002835 | 0.00029053 ± 0.00000575 | 0.0056 |
| 15D00256         | 4.3 %  | ✓ | 0.1682923 ± 0.0003258 | 0.00028563 ± 0.00000693 | 0.0067 |
| 15D00257         | 4.6 %  | ✓ | 0.1799651 ± 0.0003190 | 0.00028964 ± 0.00000640 | 0.0062 |
| 15D00258         | 4.9 %  | ✓ | 0.1869201 ± 0.0003579 | 0.00028907 ± 0.00000732 | 0.0075 |
| 15D00260         | 5.2 %  | ✓ | 0.2025127 ± 0.0004045 | 0.00028833 ± 0.00000863 | 0.0086 |
| 15D00261         | 5.5 %  | ✓ | 0.2272454 ± 0.0005091 | 0.00029132 ± 0.00000967 | 0.0102 |
| 15D00262         | 5.8 %  | ✓ | 0.2504436 ± 0.0006182 | 0.00029010 ± 0.00001226 | 0.0124 |
| 15D00264         | 6.1 %  | ✓ | 0.2843924 ± 0.0008178 | 0.00028576 ± 0.00001661 | 0.0137 |
| 15D00265         | 6.5 %  | ✓ | 0.3181404 ± 0.0011260 | 0.00030192 ± 0.00002286 | 0.0182 |
| 15D00266         | 7.0 %  | ✓ | 0.4539828 ± 0.0016106 | 0.00029636 ± 0.00002593 | 0.0210 |
| 15D00268         | 7.6 %  | ✓ | 0.4210636 ± 0.0024592 | 0.00029687 ± 0.00004422 | 0.0207 |
| 15D00269         | 8.4 %  | ✓ | 0.6840370 ± 0.0041740 | 0.00032597 ± 0.00005200 | 0.0283 |
| 15D00270         | 9.4 %  | ✓ | 0.7315451 ± 0.0069147 | 0.00032284 ± 0.00008568 | 0.0279 |
| 15D00272         | 10.5 % | ✓ | 1.0047566 ± 0.0150069 | 0.00043358 ± 0.00013718 | 0.0411 |
| 15D00273         | 11.7 % | ✓ | 1.2556009 ± 0.0261226 | 0.00066928 ± 0.00020647 | 0.0618 |
| 15D00274         | 13.1 % | ✓ | 1.3344090 ± 0.0448618 | 0.00108748 ± 0.00033456 | 0.1015 |
| 15D00276         | 14.7 % | ✓ | 1.2393730 ± 0.0520017 | 0.00138673 ± 0.00044934 | 0.1181 |
| 15D00277         | 16.5 % | ✓ | 0.8628796 ± 0.0376317 | 0.00199637 ± 0.00047604 | 0.1580 |
| 15D00278         | 18.3 % | ✓ | 0.6554701 ± 0.0428447 | 0.00220488 ± 0.00064283 | 0.1702 |
| 15D00280         | 20.2 % | ✓ | 0.5195081 ± 0.0275044 | 0.00244226 ± 0.00052493 | 0.1638 |
| 15D00281         | 22.2 % | ✓ | 0.4355156 ± 0.0279482 | 0.00233538 ± 0.00055559 | 0.1631 |
| 15D00283         | 24.5 % | ✓ | 0.3585663 ± 0.0181279 | 0.00239420 ± 0.00046636 | 0.1287 |

| Results                         | 40(a)/36(a) ± 2σ                                                                        | 40(r)/39(k) ± 2σ              | Age ± 2σ (Ma)                                          | MSWD                                 |
|---------------------------------|-----------------------------------------------------------------------------------------|-------------------------------|--------------------------------------------------------|--------------------------------------|
| Inverse Isochron<br>Error Chron | 3344.02 ± 286.75<br>± 8.58%                                                             | 0.02748 ± 0.00913<br>± 33.22% | 0.09 ± 0.03<br>± 33.22%                                | 16.89<br>0%                          |
|                                 |                                                                                         |                               | Full External Error ± 0.03<br>Analytical Error ± 0.03  |                                      |
| Statistics                      | 2σ Confidence Limit<br>Error Magnification<br>Number of Data Points<br>Spreading Factor | 1.47<br>4.1097<br>38<br>3.3%  | Convergence<br>Number of Iterations<br>Calculated Line | 0.0047624624<br>5<br>Weighted York-2 |



| OSU Argon Geochronology Lab |        |           |           |           |           |           |           |           |           |           |           |                  |                   |              |             |           |               |
|-----------------------------|--------|-----------|-----------|-----------|-----------|-----------|-----------|-----------|-----------|-----------|-----------|------------------|-------------------|--------------|-------------|-----------|---------------|
| Relative Abundances         |        | 36Ar [fA] | %1σ       | 37Ar [fA] | %1σ       | 38Ar [fA] | %1σ       | 39Ar [fA] | %1σ       | 40Ar [fA] | %1σ       | 40(r)/39(k) ± 2σ | Age ± 2σ (Ma)     | 40Ar(r) (%)  | 39Ar(k) (%) | K/Ca ± 2σ |               |
| 15D00233                    | 1.9 %  | ✓         | 0.2037626 | 0.788     | 26.1815   | 0.842     | 2.829845  | 1.398     | 87.2875   | 0.083     | 591.540   | 0.020            | 6.11139 ± 0.01516 | 19.02 ± 0.05 | 90.16       | 4.06      | 1.433 ± 0.024 |
| 15D00234                    | 2.0 %  | ✓         | 0.1920533 | 0.788     | 26.6795   | 0.822     | 2.920077  | 1.358     | 90.7420   | 0.085     | 608.867   | 0.019            | 6.10824 ± 0.01452 | 19.01 ± 0.04 | 91.02       | 4.22      | 1.462 ± 0.024 |
| 15D00236                    | 2.1 %  | ✓         | 0.1913714 | 0.784     | 27.0988   | 0.801     | 2.925454  | 1.407     | 91.2628   | 0.083     | 610.620   | 0.019            | 6.09517 ± 0.01427 | 18.97 ± 0.04 | 91.08       | 4.25      | 1.448 ± 0.023 |
| 15D00237                    | 2.2 %  | ✓         | 0.1819591 | 0.831     | 25.2043   | 0.858     | 2.820273  | 1.366     | 85.8719   | 0.085     | 574.293   | 0.020            | 6.08540 ± 0.01497 | 18.94 ± 0.05 | 90.97       | 4.00      | 1.465 ± 0.025 |
| 15D00238                    | 2.3 %  | ✓         | 0.1750434 | 0.862     | 24.8142   | 0.854     | 2.759417  | 1.465     | 83.6820   | 0.085     | 558.371   | 0.021            | 6.07844 ± 0.01512 | 18.92 ± 0.05 | 91.08       | 3.90      | 1.450 ± 0.025 |
| 15D00240                    | 2.4 %  | ✓         | 0.1990744 | 0.761     | 27.8689   | 0.767     | 3.116313  | 1.224     | 94.9116   | 0.081     | 632.941   | 0.018            | 6.07272 ± 0.01388 | 18.90 ± 0.04 | 91.04       | 4.42      | 1.464 ± 0.023 |
| 15D00241                    | 2.5 %  | ✓         | 0.1737631 | 0.912     | 25.1155   | 0.877     | 2.757705  | 1.376     | 83.7917   | 0.085     | 557.413   | 0.021            | 6.06384 ± 0.01546 | 18.87 ± 0.05 | 91.13       | 3.90      | 1.434 ± 0.025 |
| 15D00242                    | 2.6 %  | ✓         | 0.1819603 | 0.821     | 26.4680   | 0.799     | 2.910086  | 1.284     | 88.5150   | 0.083     | 585.756   | 0.020            | 6.03433 ± 0.01444 | 18.78 ± 0.04 | 91.17       | 4.12      | 1.438 ± 0.023 |
| 15D00244                    | 2.7 %  | ✓         | 0.1762406 | 0.840     | 26.4063   | 0.824     | 2.877041  | 1.379     | 87.5158   | 0.085     | 576.278   | 0.020            | 6.01419 ± 0.01456 | 18.72 ± 0.05 | 91.32       | 4.07      | 1.425 ± 0.024 |
| 15D00245                    | 2.8 %  | ✓         | 0.1697091 | 0.831     | 25.3518   | 0.843     | 2.806686  | 1.435     | 83.7441   | 0.085     | 548.928   | 0.021            | 5.98051 ± 0.01453 | 18.62 ± 0.05 | 91.22       | 3.90      | 1.420 ± 0.024 |
| 15D00246                    | 2.9 %  | ✓         | 0.1663470 | 0.950     | 25.1840   | 0.847     | 2.751238  | 1.440     | 82.1586   | 0.088     | 535.833   | 0.021            | 5.94847 ± 0.01573 | 18.52 ± 0.05 | 91.19       | 3.83      | 1.403 ± 0.024 |
| 15D00248                    | 3.0 %  | ✓         | 0.1843290 | 0.783     | 28.9535   | 0.760     | 3.064157  | 1.272     | 92.3982   | 0.084     | 594.605   | 0.020            | 5.87110 ± 0.01376 | 18.28 ± 0.04 | 91.21       | 4.30      | 1.372 ± 0.021 |
| 15D00249                    | 3.2 %  | ✓         | 0.2448333 | 0.701     | 40.0723   | 0.581     | 4.320128  | 0.949     | 127.6766  | 0.077     | 800.304   | 0.015            | 5.72696 ± 0.01201 | 17.83 ± 0.04 | 91.35       | 5.94      | 1.370 ± 0.016 |
| 15D00250                    | 3.4 %  | ✓         | 0.2006232 | 0.775     | 33.3603   | 0.678     | 3.528071  | 1.123     | 104.1864  | 0.080     | 650.001   | 0.019            | 5.69571 ± 0.01291 | 17.73 ± 0.04 | 91.27       | 4.85      | 1.343 ± 0.018 |
| 15D00252                    | 3.6 %  | ✓         | 0.2059031 | 0.774     | 36.0802   | 0.628     | 3.745494  | 1.075     | 109.8755  | 0.080     | 676.108   | 0.018            | 5.62622 ± 0.01262 | 17.52 ± 0.04 | 91.41       | 5.12      | 1.309 ± 0.017 |
| 15D00253                    | 3.8 %  | ✓         | 0.1227505 | 1.130     | 21.4289   | 0.991     | 2.242730  | 1.752     | 65.6940   | 0.093     | 406.763   | 0.027            | 5.66604 ± 0.01671 | 17.64 ± 0.05 | 91.49       | 3.06      | 1.318 ± 0.026 |
| 15D00254                    | 4.0 %  | ✓         | 0.1610116 | 0.940     | 29.0487   | 0.743     | 3.032619  | 1.261     | 87.4716   | 0.083     | 527.131   | 0.022            | 5.50924 ± 0.01395 | 17.16 ± 0.04 | 91.40       | 4.07      | 1.295 ± 0.019 |
| 15D00256                    | 4.3 %  | ✓         | 0.1181975 | 1.148     | 22.4908   | 0.956     | 2.250816  | 1.792     | 66.0643   | 0.093     | 392.533   | 0.028            | 5.44052 ± 0.01614 | 16.94 ± 0.05 | 91.54       | 3.08      | 1.263 ± 0.024 |
| 15D00257                    | 4.6 %  | ✓         | 0.1394479 | 1.043     | 28.2456   | 0.773     | 2.852622  | 1.435     | 81.9028   | 0.085     | 455.081   | 0.025            | 5.08105 ± 0.01388 | 15.83 ± 0.04 | 91.42       | 3.81      | 1.247 ± 0.019 |
| 15D00258                    | 4.9 %  | ✓         | 0.1107298 | 1.192     | 23.3696   | 0.918     | 2.350274  | 1.673     | 67.5168   | 0.091     | 361.191   | 0.030            | 4.89289 ± 0.01494 | 15.24 ± 0.05 | 91.44       | 3.14      | 1.242 ± 0.023 |
| 15D00260                    | 5.2 %  | ✓         | 0.0927527 | 1.400     | 21.6147   | 0.985     | 2.112845  | 1.889     | 61.0451   | 0.093     | 301.428   | 0.036            | 4.51724 ± 0.01555 | 14.08 ± 0.05 | 91.46       | 2.84      | 1.214 ± 0.024 |
| 15D00261                    | 5.5 %  | ✓         | 0.0761037 | 1.541     | 19.7853   | 1.028     | 1.885430  | 2.055     | 55.1986   | 0.103     | 242.900   | 0.044            | 4.02171 ± 0.01554 | 12.54 ± 0.05 | 91.37       | 2.57      | 1.199 ± 0.025 |
| 15D00262                    | 5.8 %  | ✓         | 0.0575402 | 1.943     | 16.8793   | 1.262     | 1.546172  | 2.622     | 45.7434   | 0.109     | 182.650   | 0.057            | 3.65062 ± 0.01714 | 11.39 ± 0.05 | 91.40       | 2.13      | 1.165 ± 0.030 |
| 15D00264                    | 6.1 %  | ✓         | 0.0427191 | 2.638     | 14.3667   | 1.425     | 1.271981  | 3.068     | 38.6601   | 0.122     | 135.944   | 0.076            | 3.21935 ± 0.01970 | 10.05 ± 0.06 | 91.53       | 1.80      | 1.157 ± 0.033 |
| 15D00265                    | 6.5 %  | ✓         | 0.0312726 | 3.406     | 11.4308   | 1.768     | 0.940780  | 4.155     | 29.7124   | 0.138     | 93.400    | 0.110            | 2.86284 ± 0.02369 | 8.94 ± 0.07  | 91.05       | 1.38      | 1.117 ± 0.040 |
| 15D00266                    | 7.0 %  | ✓         | 0.0275912 | 3.764     | 14.1638   | 1.428     | 1.060848  | 3.805     | 36.4404   | 0.123     | 80.284    | 0.128            | 2.00982 ± 0.01846 | 6.28 ± 0.06  | 91.20       | 1.70      | 1.106 ± 0.032 |
| 15D00268                    | 7.6 %  | ✓         | 0.0163847 | 6.439     | 8.1561    | 2.542     | 0.600371  | 6.456     | 20.1333   | 0.200     | 47.823    | 0.212            | 2.16659 ± 0.03376 | 6.77 ± 0.11  | 91.19       | 0.94      | 1.061 ± 0.054 |
| 15D00269                    | 8.4 %  | ✓         | 0.0159970 | 6.270     | 12.7179   | 1.635     | 0.647478  | 6.068     | 26.4532   | 0.155     | 38.686    | 0.262            | 1.32109 ± 0.02408 | 4.13 ± 0.08  | 90.31       | 1.23      | 0.894 ± 0.029 |
| 15D00270                    | 9.4 %  | ✓         | 0.0113291 | 9.050     | 13.4945   | 1.576     | 0.423159  | 9.884     | 17.5527   | 0.220     | 23.999    | 0.418            | 1.23656 ± 0.03684 | 3.86 ± 0.12  | 90.39       | 0.82      | 0.559 ± 0.018 |
| 15D00272                    | 10.5 % | ✓         | 0.0130046 | 7.626     | 25.4063   | 0.831     | 0.278491  | 14.661    | 14.5823   | 0.267     | 14.511    | 0.696            | 0.86775 ± 0.04288 | 2.71 ± 0.13  | 87.10       | 0.68      | 0.247 ± 0.004 |
| 15D00273                    | 11.7 % | ✓         | 0.0206073 | 5.058     | 52.3039   | 0.489     | 0.267306  | 15.926    | 12.7659   | 0.300     | 10.152    | 0.994            | 0.63892 ± 0.05116 | 2.00 ± 0.16  | 80.12       | 0.59      | 0.105 ± 0.001 |
| 15D00274                    | 13.1 % | ✓         | 0.0248621 | 4.192     | 68.2659   | 0.417     | 0.182138  | 21.728    | 8.4276    | 0.447     | 6.290     | 1.618            | 0.50858 ± 0.07771 | 1.59 ± 0.24  | 67.77       | 0.39      | 0.053 ± 0.001 |
| 15D00276                    | 14.7 % | ✓         | 0.0371571 | 3.004     | 114.2937  | 0.338     | 0.171498  | 22.294    | 6.3088    | 0.615     | 5.035     | 2.001            | 0.47623 ± 0.11128 | 1.49 ± 0.35  | 58.95       | 0.29      | 0.023 ± 0.000 |
| 15D00277                    | 16.5 % | ✓         | 0.0528531 | 2.201     | 162.4325  | 0.313     | 0.087619  | 47.003    | 4.4174    | 0.784     | 4.997     | 2.025            | 0.47524 ± 0.16755 | 1.49 ± 0.52  | 40.97       | 0.20      | 0.011 ± 0.000 |
| 15D00278                    | 18.3 % | ✓         | 0.0448757 | 2.474     | 140.3645  | 0.324     | 0.105471  | 37.329    | 2.4166    | 1.541     | 3.545     | 2.846            | 0.53161 ± 0.29769 | 1.66 ± 0.93  | 34.82       | 0.11      | 0.007 ± 0.000 |
| 15D00280                    | 20.2 % | ✓         | 0.0736719 | 1.597     | 236.1813  | 0.299     | 0.100164  | 38.639    | 2.5653    | 1.437     | 4.634     | 2.158            | 0.53572 ± 0.30452 | 1.68 ± 0.95  | 27.82       | 0.11      | 0.004 ± 0.000 |
| 15D00281                    | 22.2 % | ✓         | 0.0592314 | 1.831     | 188.6925  | 0.306     | 0.039574  | 102.384   | 1.8827    | 1.881     | 4.033     | 2.494            | 0.71156 ± 0.38705 | 2.23 ± 1.21  | 30.98       | 0.08      | 0.004 ± 0.000 |
| 15D00283                    | 24.5 % | ✓         | 0.0947407 | 1.353     | 307.2412  | 0.293     | 0.158230  | 25.300    | 2.2458    | 1.629     | 5.689     | 1.779            | 0.81578 ± 0.39179 | 2.55 ± 1.22  | 29.24       | 0.09      | 0.003 ± 0.000 |
| Σ                           |        |           | 4.2918046 | 0.191     | 1977.2136 | 0.098     | 70.740600 | 0.346     | 2148.8209 | 0.018     | 12450.557 | 0.005            |                   |              |             |           |               |

| Information on Analysis and Constants Used in Calculations |                                                                 | Results                     |                             |                             |              |                      |               |  |
|------------------------------------------------------------|-----------------------------------------------------------------|-----------------------------|-----------------------------|-----------------------------|--------------|----------------------|---------------|--|
|                                                            |                                                                 | 40(a)/36(a) ± 2σ            | 40(r)/39(k) ± 2σ            | Age ± 2σ (Ma)               | MSWD         | 39Ar(k) (%.n)        | K/Ca ± 2σ     |  |
| Sample = CAPTAINS SAMPLE                                   | Age Equations = Min et al. (2000)                               |                             |                             |                             |              |                      |               |  |
| Material = Groundmass                                      | Negative Intensities = Allowed                                  |                             |                             |                             |              |                      |               |  |
| Location = Kerguelen Plateau                               | Decay Constant 40K = 5.530 ± 0.048 E-10 1/a                     |                             | 5.27240 ± 0.40315 ± 7.65%   | 16.42 ± 1.25 ± 7.63%        | > 100        | 100.00               | 0.007 ± 0.007 |  |
| Analyst = Anthony Koppers                                  | Decay Constant 39Ar = 2.940 ± 0.016 E-07 1/h                    |                             |                             | Full External Error ± 1.31  | 0%           | 38                   |               |  |
| Project = KERGUELEN   FALLOON (14-PIL-01)                  | Decay Constant 37Ar = 8.230 ± 0.012 E-04 1/h                    |                             |                             | Analytical Error ± 1.25     | 1.46         | 2σ Confidence Limit  |               |  |
| Mass Discrimination Law = LIN                              | Decay Constant 36Cl = 2.257 ± 0.015 E-06 1/a                    |                             |                             |                             | > 10         | Error Magnification  |               |  |
| Irradiation = 14-OSU-06 (6C15-14)                          | Decay Constant 40K(EC,β <sup>+</sup> ) = 0.580 ± 0.009 E-10 1/a |                             |                             |                             |              |                      |               |  |
| J = 0.00173028 ± 0.00000443                                | Decay Constant 40K(β <sup>-</sup> ) = 4.950 ± 0.043 E-10 1/a    |                             |                             |                             |              |                      |               |  |
| FCT-NM = 28.201 ± 0.023 Ma                                 | Atmospheric Ratio 40/36(a) = 295.50                             |                             | 5.27866 ± 0.00300 ± 0.06%   | 16.44 ± 0.08 ± 0.51%        |              | 38                   | 0.467 ± 0.001 |  |
| IGSN = Undefined                                           | Atmospheric Ratio 38/36(a) = 0.1869                             |                             |                             | Full External Error ± 0.38  |              |                      |               |  |
| Preferred Age = Undefined                                  | Production Ratio 39/37(ca) = 0.000673                           |                             |                             | Analytical Error ± 0.01     |              |                      |               |  |
| Classification = Undefined                                 | Production Ratio 38/37(ca) = 0.000014                           | 14059.41 ± 4207.51 ± 29.93% | 20.67215 ± 7.99997 ± 38.70% | 65.87 ± 25.96 ± 39.42%      | > 100        | 100.00               |               |  |
| Experiment Type = Incremental Heating                      | Production Ratio 36/37(ca) = 0.000264                           |                             |                             | Full External Error ± 26.01 | 0%           | 38                   |               |  |
| Extraction Method = Undefined                              | Production Ratio 40/39(k) = 0.001010                            |                             |                             | Analytical Error ± 25.96    | 1.47         | 2σ Confidence Limit  |               |  |
| Heating = 77 sec                                           | Production Ratio 38/39(k) = 0.011380                            |                             |                             |                             | > 10         | Error Magnification  |               |  |
| Isolation = 6.00 min                                       | Production Ratio 36/38(cl) = 262.80 ± 1.71                      |                             |                             |                             | 9            | Number of Iterations |               |  |
| Instrument = ARGUS-VI-D                                    | Scaling Ratio K/Ca = 0.430                                      |                             |                             |                             | 0.0000601872 | Convergence          |               |  |
| Lithology = Undefined                                      | Abundance Ratio 40K/K = 1.1700 ± 0.0100 E-04                    |                             |                             |                             |              |                      |               |  |
| Lat-Lon = Undefined - Undefined                            | Atomic Weight K = 39.0983 ± 0.0001 g                            | 3344.02 ± 286.75 ± 8.58%    | 0.02748 ± 0.00913 ± 33.22%  | 0.09 ± 0.03 ± 33.22%        | 16.89        | 100.00               |               |  |
| Collector Calibrations = 40Ar 36Ar                         |                                                                 |                             |                             | Full External Error ± 0.03  | 0%           | 38                   |               |  |
|                                                            |                                                                 |                             |                             |                             | 1.47         | 2σ Confidence Limit  |               |  |
|                                                            |                                                                 |                             |                             |                             |              |                      |               |  |
|                                                            |                                                                 |                             |                             |                             |              |                      |               |  |
|                                                            |                                                                 |                             |                             |                             |              |                      |               |  |
|                                                            |                                                                 |                             |                             |                             |              |                      |               |  |
|                                                            |                                                                 |                             |                             |                             |              |                      |               |  |
|                                                            |                                                                 |                             |                             |                             |              |                      |               |  |
|                                                            |                                                                 |                             |                             |                             |              |                      |               |  |
|                                                            |                                                                 |                             |                             |                             |              |                      |               |  |
|                                                            |                                                                 |                             |                             |                             |              |                      |               |  |
|                                                            |                                                                 |                             |                             |                             |              |                      |               |  |
|                                                            |                                                                 |                             |                             |                             |              |                      |               |  |
|                                                            |                                                                 |                             |                             |                             |              |                      |               |  |
|                                                            |                                                                 |                             |                             |                             |              |                      |               |  |
|                                                            |                                                                 |                             |                             |                             |              |                      |               |  |
|                                                            |                                                                 |                             |                             |                             |              |                      |               |  |
|                                                            |                                                                 |                             |                             |                             |              |                      |               |  |
|                                                            |                                                                 |                             |                             |                             |              |                      |               |  |
|                                                            |                                                                 |                             |                             |                             |              |                      |               |  |
|                                                            |                                                                 |                             |                             |                             |              |                      |               |  |
|                                                            |                                                                 |                             |                             |                             |              |                      |               |  |
|                                                            |                                                                 |                             |                             |                             |              |                      |               |  |
|                                                            |                                                                 |                             |                             |                             |              |                      |               |  |
|                                                            |                                                                 |                             |                             |                             |              |                      |               |  |
|                                                            |                                                                 |                             |                             |                             |              |                      |               |  |
|                                                            |                                                                 |                             |                             |                             |              |                      |               |  |
|                                                            |                                                                 |                             |                             |                             |              |                      |               |  |
|                                                            |                                                                 |                             |                             |                             |              |                      |               |  |
|                                                            |                                                                 |                             |                             |                             |              |                      |               |  |
|                                                            |                                                                 |                             |                             |                             |              |                      |               |  |
|                                                            |                                                                 |                             |                             |                             |              |                      |               |  |
|                                                            |                                                                 |                             |                             |                             |              |                      |               |  |
|                                                            |                                                                 |                             |                             |                             |              |                      |               |  |
|                                                            |                                                                 |                             |                             |                             |              |                      |               |  |
|                                                            |                                                                 |                             |                             |                             |              |                      |               |  |
|                                                            |                                                                 |                             |                             |                             |              |                      |               |  |
|                                                            |                                                                 |                             |                             |                             |              |                      |               |  |
|                                                            |                                                                 |                             |                             |                             |              |                      |               |  |
|                                                            |                                                                 |                             |                             |                             |              |                      |               |  |
|                                                            |                                                                 |                             |                             |                             |              |                      |               |  |
|                                                            |                                                                 |                             |                             |                             |              |                      |               |  |
|                                                            |                                                                 |                             |                             |                             |              |                      |               |  |
|                                                            |                                                                 |                             |                             |                             |              |                      |               |  |
|                                                            |                                                                 |                             |                             |                             |              |                      |               |  |
|                                                            |                                                                 |                             |                             |                             |              |                      |               |  |
|                                                            |                                                                 |                             |                             |                             |              |                      |               |  |
|                                                            |                                                                 |                             |                             |                             |              |                      |               |  |
|                                                            |                                                                 |                             |                             |                             |              |                      |               |  |
|                                                            |                                                                 |                             |                             |                             |              |                      |               |  |
|                                                            |                                                                 |                             |                             |                             |              |                      |               |  |
|                                                            |                                                                 |                             |                             |                             |              |                      |               |  |
|                                                            |                                                                 |                             |                             |                             |              |                      |               |  |
|                                                            |                                                                 |                             |                             |                             |              |                      |               |  |
|                                                            |                                                                 |                             |                             |                             |              |                      |               |  |
|                                                            |                                                                 |                             |                             |                             |              |                      |               |  |
|                                                            |                                                                 |                             |                             |                             |              |                      |               |  |
|                                                            |                                                                 |                             |                             |                             |              |                      |               |  |
|                                                            |                                                                 |                             |                             |                             |              |                      |               |  |
|                                                            |                                                                 |                             |                             |                             |              |                      |               |  |
|                                                            |                                                                 |                             |                             |                             |              |                      |               |  |
|                                                            |                                                                 |                             |                             |                             |              |                      |               |  |
|                                                            |                                                                 |                             |                             |                             |              |                      |               |  |
|                                                            |                                                                 |                             |                             |                             |              |                      |               |  |
|                                                            |                                                                 |                             |                             |                             |              |                      |               |  |
|                                                            |                                                                 |                             |                             |                             |              |                      |               |  |
|                                                            |                                                                 |                             |                             |                             |              |                      |               |  |
|                                                            |                                                                 |                             |                             |                             |              |                      |               |  |
|                                                            |                                                                 |                             |                             |                             |              |                      |               |  |
|                                                            |                                                                 |                             |                             |                             |              |                      |               |  |
|                                                            |                                                                 |                             |                             |                             |              |                      |               |  |
|                                                            |                                                                 |                             |                             |                             |              |                      |               |  |
|                                                            |                                                                 |                             |                             |                             |              |                      |               |  |
|                                                            |                                                                 |                             |                             |                             |              |                      |               |  |
|                                                            |                                                                 |                             |                             |                             |              |                      |               |  |
|                                                            |                                                                 |                             |                             |                             |              |                      |               |  |
|                                                            |                                                                 |                             |                             |                             |              |                      |               |  |
|                                                            |                                                                 |                             |                             |                             |              |                      |               |  |
|                                                            |                                                                 |                             |                             |                             |              |                      |               |  |
|                                                            |                                                                 |                             |                             |                             |              |                      |               |  |
|                                                            |                                                                 |                             |                             |                             |              |                      |               |  |
|                                                            |                                                                 |                             |                             |                             |              |                      |               |  |
|                                                            |                                                                 |                             |                             |                             |              |                      |               |  |
|                                                            |                                                                 |                             |                             |                             |              |                      |               |  |
|                                                            |                                                                 |                             |                             |                             |              |                      |               |  |
|                                                            |                                                                 |                             |                             |                             |              |                      |               |  |
|                                                            |                                                                 |                             |                             |                             |              |                      |               |  |
|                                                            |                                                                 |                             |                             |                             |              |                      |               |  |
|                                                            |                                                                 |                             |                             |                             |              |                      |               |  |
|                                                            |                                                                 |                             |                             |                             |              |                      |               |  |
|                                                            |                                                                 |                             |                             |                             |              |                      |               |  |
|                                                            |                                                                 |                             |                             |                             |              |                      |               |  |
|                                                            |                                                                 |                             |                             |                             |              |                      |               |  |
|                                                            |                                                                 |                             |                             |                             |              |                      |               |  |
|                                                            |                                                                 |                             |                             |                             |              |                      |               |  |
|                                                            |                                                                 |                             |                             |                             |              |                      |               |  |
|                                                            |                                                                 |                             |                             |                             |              |                      |               |  |
|                                                            |                                                                 |                             |                             |                             |              |                      |               |  |
|                                                            |                                                                 |                             |                             |                             |              |                      |               |  |
|                                                            |                                                                 |                             |                             |                             |              |                      |               |  |
|                                                            |                                                                 |                             |                             |                             |              |                      |               |  |
|                                                            |                                                                 |                             |                             |                             |              |                      |               |  |
|                                                            |                                                                 |                             |                             |                             |              |                      |               |  |
|                                                            |                                                                 |                             |                             |                             |              |                      |               |  |
|                                                            |                                                                 |                             |                             |                             |              |                      |               |  |
|                                                            |                                                                 |                             |                             |                             |              |                      |               |  |
|                                                            |                                                                 |                             |                             |                             |              |                      |               |  |
|                                                            |                                                                 |                             |                             |                             |              |                      |               |  |
|                                                            |                                                                 |                             |                             |                             |              |                      |               |  |
|                                                            |                                                                 |                             |                             |                             |              |                      |               |  |
|                                                            |                                                                 |                             |                             |                             |              |                      |               |  |
|                                                            |                                                                 |                             |                             |                             |              |                      |               |  |
|                                                            |                                                                 |                             |                             |                             |              |                      |               |  |
|                                                            |                                                                 |                             |                             |                             |              |                      |               |  |



| OSU Argon Geochronology Lab |                 |   |           |                 |           |      |                  |      |           |                  |         |      |                  |      |           |                 |          |      |                 |      |          |                 |          |      |                  |      |         |                  |         |      |                 |      |           |                  |  |     |                 |  |     |                 |  |     |                 |  |     |                 |  |     |
|-----------------------------|-----------------|---|-----------|-----------------|-----------|------|------------------|------|-----------|------------------|---------|------|------------------|------|-----------|-----------------|----------|------|-----------------|------|----------|-----------------|----------|------|------------------|------|---------|------------------|---------|------|-----------------|------|-----------|------------------|--|-----|-----------------|--|-----|-----------------|--|-----|-----------------|--|-----|-----------------|--|-----|
| Degassing<br>Patterns       | 36Ar(a)<br>[fA] |   | %1σ       | 36Ar(c)<br>[fA] |           | %1σ  | 36Ar(ca)<br>[fA] |      | %1σ       | 36Ar(cl)<br>[fA] |         | %1σ  | 37Ar(ca)<br>[fA] |      | %1σ       | 38Ar(a)<br>[fA] |          | %1σ  | 38Ar(c)<br>[fA] |      | %1σ      | 38Ar(k)<br>[fA] |          | %1σ  | 38Ar(ca)<br>[fA] |      | %1σ     | 38Ar(cl)<br>[fA] |         | %1σ  | 39Ar(k)<br>[fA] |      | %1σ       | 39Ar(ca)<br>[fA] |  | %1σ | 40Ar(r)<br>[fA] |  | %1σ | 40Ar(a)<br>[fA] |  | %1σ | 40Ar(c)<br>[fA] |  | %1σ | 40Ar(k)<br>[fA] |  | %1σ |
|                             |                 |   |           |                 |           |      |                  |      |           |                  |         |      |                  |      |           |                 |          |      |                 |      |          |                 |          |      |                  |      |         |                  |         |      |                 |      |           |                  |  |     |                 |  |     |                 |  |     |                 |  |     |                 |  |     |
| 15D00233                    | 1.9 %           | ✓ | 0.1966552 | 0.82            | 0.0000000 | 0.00 | 0.0069119        | 0.84 | 0.0001954 | 2.38             | 26.1815 | 0.84 | 0.0367549        | 0.82 | 0.0000000 | 0.00            | 0.993131 | 0.08 | 0.0003639       | 0.84 | 1.799595 | 2.55            | 87.2699  | 0.08 | 0.0176202        | 0.84 | 533.340 | 0.09             | 58.1116 | 0.82 | 0.0000000       | 0.00 | 0.0881426 | 0.08             |  |     |                 |  |     |                 |  |     |                 |  |     |                 |  |     |
| 15D00234                    | 2.0 %           | ✓ | 0.1848087 | 0.82            | 0.0000000 | 0.00 | 0.0070434        | 0.82 | 0.0002012 | 2.33             | 26.6795 | 0.82 | 0.0345407        | 0.82 | 0.0000000 | 0.00            | 1.032440 | 0.08 | 0.0003708       | 0.82 | 1.852725 | 2.50            | 90.7241  | 0.08 | 0.0179553        | 0.82 | 554.165 | 0.08             | 54.6110 | 0.82 | 0.0000000       | 0.00 | 0.0916313 | 0.08             |  |     |                 |  |     |                 |  |     |                 |  |     |                 |  |     |
| 15D00236                    | 2.1 %           | ✓ | 0.1840160 | 0.82            | 0.0000000 | 0.00 | 0.0071541        | 0.80 | 0.0002013 | 2.40             | 27.0988 | 0.80 | 0.0343926        | 0.82 | 0.0000000 | 0.00            | 1.038363 | 0.08 | 0.0003767       | 0.80 | 1.852322 | 2.57            | 91.2445  | 0.08 | 0.0182375        | 0.80 | 556.151 | 0.08             | 54.3767 | 0.82 | 0.0000000       | 0.00 | 0.0921570 | 0.08             |  |     |                 |  |     |                 |  |     |                 |  |     |                 |  |     |
| 15D00237                    | 2.2 %           | ✓ | 0.1751084 | 0.86            | 0.0000000 | 0.00 | 0.0066539        | 0.86 | 0.0001967 | 2.32             | 25.2043 | 0.86 | 0.0327278        | 0.86 | 0.0000000 | 0.00            | 0.977029 | 0.09 | 0.0003503       | 0.86 | 1.810166 | 2.50            | 85.8549  | 0.09 | 0.0169625        | 0.86 | 522.462 | 0.09             | 51.7445 | 0.86 | 0.0000000       | 0.00 | 0.0867135 | 0.09             |  |     |                 |  |     |                 |  |     |                 |  |     |                 |  |     |
| 15D00238                    | 2.3 %           | ✓ | 0.1682995 | 0.90            | 0.0000000 | 0.00 | 0.0065509        | 0.85 | 0.0001930 | 2.46             | 24.8142 | 0.85 | 0.0314552        | 0.90 | 0.0000000 | 0.00            | 0.952111 | 0.09 | 0.0003449       | 0.85 | 1.775506 | 2.62            | 83.6653  | 0.09 | 0.0166999        | 0.85 | 508.554 | 0.09             | 49.7325 | 0.90 | 0.0000000       | 0.00 | 0.0845019 | 0.09             |  |     |                 |  |     |                 |  |     |                 |  |     |                 |  |     |
| 15D00240                    | 2.4 %           | ✓ | 0.1914996 | 0.79            | 0.0000000 | 0.00 | 0.0073574        | 0.77 | 0.0002174 | 2.12             | 27.8689 | 0.77 | 0.0357913        | 0.79 | 0.0000000 | 0.00            | 1.079880 | 0.08 | 0.0003874       | 0.77 | 2.000254 | 2.31            | 94.8928  | 0.08 | 0.0187557        | 0.77 | 576.257 | 0.08             | 56.5881 | 0.79 | 0.0000000       | 0.00 | 0.0958417 | 0.08             |  |     |                 |  |     |                 |  |     |                 |  |     |                 |  |     |
| 15D00241                    | 2.5 %           | ✓ | 0.1669399 | 0.95            | 0.0000000 | 0.00 | 0.0066305        | 0.88 | 0.0001927 | 2.33             | 25.1155 | 0.88 | 0.0312011        | 0.95 | 0.0000000 | 0.00            | 0.953357 | 0.08 | 0.0003491       | 0.88 | 1.772798 | 2.50            | 83.7748  | 0.08 | 0.0169028        | 0.88 | 507.997 | 0.10             | 49.3307 | 0.95 | 0.0000000       | 0.00 | 0.0846125 | 0.08             |  |     |                 |  |     |                 |  |     |                 |  |     |                 |  |     |
| 15D00242                    | 2.6 %           | ✓ | 0.1747694 | 0.86            | 0.0000000 | 0.00 | 0.0069876        | 0.80 | 0.0002033 | 2.20             | 26.4680 | 0.80 | 0.0326644        | 0.86 | 0.0000000 | 0.00            | 1.007098 | 0.08 | 0.0003679       | 0.80 | 1.869955 | 2.38            | 88.4972  | 0.08 | 0.0178130        | 0.80 | 534.022 | 0.09             | 51.6444 | 0.86 | 0.0000000       | 0.00 | 0.0893822 | 0.08             |  |     |                 |  |     |                 |  |     |                 |  |     |                 |  |     |
| 15D00244                    | 2.7 %           | ✓ | 0.1690682 | 0.88            | 0.0000000 | 0.00 | 0.0069713        | 0.82 | 0.0002011 | 2.33             | 26.4063 | 0.82 | 0.0315989        | 0.88 | 0.0000000 | 0.00            | 0.995728 | 0.09 | 0.0003670       | 0.82 | 1.849347 | 2.51            | 87.4981  | 0.09 | 0.0177714        | 0.82 | 526.230 | 0.09             | 49.9597 | 0.88 | 0.0000000       | 0.00 | 0.0883731 | 0.09             |  |     |                 |  |     |                 |  |     |                 |  |     |                 |  |     |
| 15D00245                    | 2.8 %           | ✓ | 0.1628180 | 0.87            | 0.0000000 | 0.00 | 0.0066929        | 0.84 | 0.0001983 | 2.39             | 25.3518 | 0.84 | 0.0304307        | 0.87 | 0.0000000 | 0.00            | 0.952814 | 0.09 | 0.0003524       | 0.84 | 1.823089 | 2.56            | 83.7270  | 0.09 | 0.0170618        | 0.84 | 500.731 | 0.09             | 48.1127 | 0.87 | 0.0000000       | 0.00 | 0.0845643 | 0.09             |  |     |                 |  |     |                 |  |     |                 |  |     |                 |  |     |
| 15D00246                    | 2.9 %           | ✓ | 0.1595041 | 0.99            | 0.0000000 | 0.00 | 0.0066486        | 0.85 | 0.0001943 | 2.40             | 25.1840 | 0.85 | 0.0298113        | 0.99 | 0.0000000 | 0.00            | 0.934772 | 0.09 | 0.0003501       | 0.85 | 1.786305 | 2.57            | 82.1417  | 0.09 | 0.0169488        | 0.85 | 488.617 | 0.10             | 47.1335 | 0.99 | 0.0000000       | 0.00 | 0.0829631 | 0.09             |  |     |                 |  |     |                 |  |     |                 |  |     |                 |  |     |
| 15D00248                    | 3.0 %           | ✓ | 0.1764699 | 0.82            | 0.0000000 | 0.00 | 0.0076437        | 0.76 | 0.0002154 | 2.17             | 28.9535 | 0.76 | 0.0329822        | 0.82 | 0.0000000 | 0.00            | 1.051270 | 0.08 | 0.0004025       | 0.76 | 1.979503 | 2.36            | 92.3788  | 0.08 | 0.0194857        | 0.76 | 542.365 | 0.08             | 52.1468 | 0.82 | 0.0000000       | 0.00 | 0.0933025 | 0.08             |  |     |                 |  |     |                 |  |     |                 |  |     |                 |  |     |
| 15D00249                    | 3.2 %           | ✓ | 0.2339470 | 0.73            | 0.0000000 | 0.00 | 0.0105791        | 0.58 | 0.0003072 | 1.72             | 40.0723 | 0.58 | 0.0437247        | 0.73 | 0.0000000 | 0.00            | 1.452653 | 0.08 | 0.0005570       | 0.58 | 2.823194 | 1.95            | 127.6496 | 0.08 | 0.0269686        | 0.58 | 731.044 | 0.07             | 69.1313 | 0.73 | 0.0000000       | 0.00 | 0.1289261 | 0.08             |  |     |                 |  |     |                 |  |     |                 |  |     |                 |  |     |
| 15D00250                    | 3.4 %           | ✓ | 0.1915651 | 0.81            | 0.0000000 | 0.00 | 0.0088071        | 0.68 | 0.0002510 | 1.95             | 33.3603 | 0.68 | 0.0358035        | 0.81 | 0.0000000 | 0.00            | 1.185385 | 0.08 | 0.0004637       | 0.68 | 2.306419 | 2.15            | 104.1639 | 0.08 | 0.0224515        | 0.68 | 593.288 | 0.08             | 56.6075 | 0.81 | 0.0000000       | 0.00 | 0.1052056 | 0.08             |  |     |                 |  |     |                 |  |     |                 |  |     |                 |  |     |
| 15D00252                    | 3.6 %           | ✓ | 0.1961103 | 0.81            | 0.0000000 | 0.00 | 0.0095252        | 0.63 | 0.0002676 | 1.88             | 36.0802 | 0.63 | 0.0366530        | 0.81 | 0.0000000 | 0.00            | 1.250107 | 0.08 | 0.0005015       | 0.63 | 2.458232 | 2.09            | 109.8512 | 0.08 | 0.0242819        | 0.63 | 618.047 | 0.08             | 57.9506 | 0.81 | 0.0000000       | 0.00 | 0.1109497 | 0.08             |  |     |                 |  |     |                 |  |     |                 |  |     |                 |  |     |
| 15D00253                    | 3.8 %           | ✓ | 0.1169329 | 1.19            | 0.0000000 | 0.00 | 0.0056572        | 0.99 | 0.0001604 | 2.82             | 21.4289 | 0.99 | 0.0218548        | 1.19 | 0.0000000 | 0.00            | 0.747434 | 0.09 | 0.0002979       | 0.99 | 1.473143 | 2.97            | 65.6796  | 0.09 | 0.0144216        | 0.99 | 372.143 | 0.11             | 34.5537 | 1.19 | 0.0000000       | 0.00 | 0.0663364 | 0.09             |  |     |                 |  |     |                 |  |     |                 |  |     |                 |  |     |
| 15D00254                    | 4.0 %           | ✓ | 0.1531240 | 0.99            | 0.0000000 | 0.00 | 0.0076688        | 0.74 | 0.0002187 | 2.11             | 29.0487 | 0.74 | 0.0286189        | 0.99 | 0.0000000 | 0.00            | 0.995204 | 0.08 | 0.0004038       | 0.74 | 2.008392 | 2.31            | 87.4520  | 0.08 | 0.0195497        | 0.74 | 481.794 | 0.10             | 45.2482 | 0.99 | 0.0000000       | 0.00 | 0.0883265 | 0.08             |  |     |                 |  |     |                 |  |     |                 |  |     |                 |  |     |
| 15D00256                    | 4.3 %           | ✓ | 0.1120989 | 1.21            | 0.0000000 | 0.00 | 0.0059376        | 0.96 | 0.0001610 | 2.88             | 22.4908 | 0.96 | 0.0209513        | 1.21 | 0.0000000 | 0.00            | 0.751639 | 0.09 | 0.0003126       | 0.96 | 1.477913 | 3.02            | 66.0491  | 0.09 | 0.0151363        | 0.96 | 359.341 | 0.12             | 33.1252 | 1.21 | 0.0000000       | 0.00 | 0.0667096 | 0.09             |  |     |                 |  |     |                 |  |     |                 |  |     |                 |  |     |
| 15D00257                    | 4.6 %           | ✓ | 0.1317846 | 1.10            | 0.0000000 | 0.00 | 0.0074568        | 0.77 | 0.0002065 | 2.35             | 28.2456 | 0.77 | 0.0246305        | 1.10 | 0.0000000 | 0.00            | 0.931837 | 0.09 | 0.0003926       | 0.77 | 1.895761 | 2.52            | 81.8838  | 0.09 | 0.0190093        | 0.77 | 416.056 | 0.11             | 38.9423 | 1.10 | 0.0000000       | 0.00 | 0.0827026 | 0.09             |  |     |                 |  |     |                 |  |     |                 |  |     |                 |  |     |
| 15D00258                    | 4.9 %           | ✓ | 0.1043900 | 1.27            | 0.0000000 | 0.00 | 0.0061696        | 0.92 | 0.0001702 | 2.68             | 23.3696 | 0.92 | 0.0195105        | 1.27 | 0.0000000 | 0.00            | 0.768162 | 0.09 | 0.0003248       | 0.92 | 1.562276 | 2.83            | 67.5011  | 0.09 | 0.0157277        | 0.92 | 330.275 | 0.12             | 30.8473 | 1.27 | 0.0000000       | 0.00 | 0.0681761 | 0.09             |  |     |                 |  |     |                 |  |     |                 |  |     |                 |  |     |
| 15D00260                    | 5.2 %           | ✓ | 0.0868937 | 1.50            | 0.0000000 | 0.00 | 0.0057063        | 0.99 | 0.0001528 | 2.99             | 21.6147 | 0.99 | 0.0162404        | 1.50 | 0.0000000 | 0.00            | 0.694528 | 0.09 | 0.0003004       | 0.99 | 1.401777 | 3.13            | 61.0305  | 0.09 | 0.0145467        | 0.99 | 275.689 | 0.14             | 25.6771 | 1.50 | 0.0000000       | 0.00 | 0.0616409 | 0.09             |  |     |                 |  |     |                 |  |     |                 |  |     |                 |  |     |
| 15D00261                    | 5.5 %           | ✓ | 0.0707448 | 1.66            | 0.0000000 | 0.00 | 0.0052233        | 1.03 | 0.0001356 | 3.25             | 19.7853 | 1.03 | 0.0132222        | 1.66 | 0.0000000 | 0.00            | 0.628008 | 0.10 | 0.0002750       | 1.03 | 1.243924 | 3.38            | 55.1853  | 0.10 | 0.0133155        | 1.03 | 221.939 | 0.16             | 20.9051 | 1.66 | 0.0000000       | 0.00 | 0.0557371 | 0.10             |  |     |                 |  |     |                 |  |     |                 |  |     |                 |  |     |
| 15D00262                    | 5.8 %           | ✓ | 0.0529733 | 2.11            | 0.0000000 | 0.00 | 0.0044561        | 1.26 | 0.0001107 | 4.10             | 16.8793 | 1.26 | 0.0099007        | 2.11 | 0.0000000 | 0.00            | 0.520431 | 0.11 | 0.0002346       | 1.26 | 1.015606 | 4.20            | 45.7320  | 0.11 | 0.0113598        | 1.26 | 166.951 | 0.21             | 15.6536 | 2.11 | 0.0000000       | 0.00 | 0.0461894 | 0.11             |  |     |                 |  |     |                 |  |     |                 |  |     |                 |  |     |
| </                          |                 |   |           |                 |           |      |                  |      |           |                  |         |      |                  |      |           |                 |          |      |                 |      |          |                 |          |      |                  |      |         |                  |         |      |                 |      |           |                  |  |     |                 |  |     |                 |  |     |                 |  |     |                 |  |     |



| Additional<br>Parameters |        |   | 40Ar/39Ar | 1σ       | 37Ar/39Ar  | 1σ       | 36Ar/39Ar | 1σ       | Time<br>(days) | 37Ar<br>(decay) | 39Ar<br>(decay) | 40Ar<br>(moles) |
|--------------------------|--------|---|-----------|----------|------------|----------|-----------|----------|----------------|-----------------|-----------------|-----------------|
| 15D00233                 | 1.9 %  | ✓ | 6.776915  | 0.005816 | 0.299946   | 0.002538 | 0.002334  | 0.000018 | 66.877         | 3.756261        | 1.00047288      | 2.839E-11       |
| 15D00234                 | 2.0 %  | ✓ | 6.709868  | 0.005821 | 0.294015   | 0.002430 | 0.002116  | 0.000017 | 66.885         | 3.756880        | 1.00047294      | 2.923E-11       |
| 15D00236                 | 2.1 %  | ✓ | 6.690786  | 0.005707 | 0.296932   | 0.002392 | 0.002097  | 0.000017 | 66.903         | 3.758168        | 1.00047306      | 2.931E-11       |
| 15D00237                 | 2.2 %  | ✓ | 6.687789  | 0.005874 | 0.293510   | 0.002532 | 0.002119  | 0.000018 | 66.912         | 3.758838        | 1.00047312      | 2.757E-11       |
| 15D00238                 | 2.3 %  | ✓ | 6.672538  | 0.005844 | 0.296530   | 0.002546 | 0.002092  | 0.000018 | 66.920         | 3.759457        | 1.00047318      | 2.680E-11       |
| 15D00240                 | 2.4 %  | ✓ | 6.668748  | 0.005552 | 0.293630   | 0.002265 | 0.002097  | 0.000016 | 66.938         | 3.760747        | 1.00047330      | 3.038E-11       |
| 15D00241                 | 2.5 %  | ✓ | 6.652362  | 0.005821 | 0.299738   | 0.002641 | 0.002074  | 0.000019 | 66.946         | 3.761366        | 1.00047336      | 2.676E-11       |
| 15D00242                 | 2.6 %  | ✓ | 6.617584  | 0.005684 | 0.299023   | 0.002402 | 0.002056  | 0.000017 | 66.955         | 3.762036        | 1.00047343      | 2.812E-11       |
| 15D00244                 | 2.7 %  | ✓ | 6.584840  | 0.005758 | 0.301731   | 0.002499 | 0.002014  | 0.000017 | 66.972         | 3.763327        | 1.00047355      | 2.766E-11       |
| 15D00245                 | 2.8 %  | ✓ | 6.554824  | 0.005764 | 0.302730   | 0.002566 | 0.002027  | 0.000017 | 66.981         | 3.763946        | 1.00047361      | 2.635E-11       |
| 15D00246                 | 2.9 %  | ✓ | 6.521939  | 0.005917 | 0.306529   | 0.002609 | 0.002025  | 0.000019 | 66.989         | 3.764566        | 1.00047367      | 2.572E-11       |
| 15D00248                 | 3.0 %  | ✓ | 6.435239  | 0.005556 | 0.313356   | 0.002395 | 0.001995  | 0.000016 | 67.006         | 3.765857        | 1.00047379      | 2.854E-11       |
| 15D00249                 | 3.2 %  | ✓ | 6.268215  | 0.004903 | 0.313858   | 0.001840 | 0.001918  | 0.000014 | 67.015         | 3.766528        | 1.00047385      | 3.841E-11       |
| 15D00250                 | 3.4 %  | ✓ | 6.238824  | 0.005136 | 0.320198   | 0.002186 | 0.001926  | 0.000015 | 67.024         | 3.767149        | 1.00047391      | 3.120E-11       |
| 15D00252                 | 3.6 %  | ✓ | 6.153405  | 0.005031 | 0.328373   | 0.002080 | 0.001874  | 0.000015 | 67.041         | 3.768441        | 1.00047404      | 3.245E-11       |
| 15D00253                 | 3.8 %  | ✓ | 6.191783  | 0.006016 | 0.326192   | 0.003246 | 0.001869  | 0.000021 | 67.049         | 3.769061        | 1.00047409      | 1.952E-11       |
| 15D00254                 | 4.0 %  | ✓ | 6.026310  | 0.005147 | 0.332093   | 0.002484 | 0.001841  | 0.000017 | 67.058         | 3.769733        | 1.00047416      | 2.530E-11       |
| 15D00256                 | 4.3 %  | ✓ | 5.941691  | 0.005750 | 0.340439   | 0.003268 | 0.001789  | 0.000021 | 67.076         | 3.771026        | 1.00047428      | 1.884E-11       |
| 15D00257                 | 4.6 %  | ✓ | 5.556353  | 0.004923 | 0.344867   | 0.002683 | 0.001703  | 0.000018 | 67.084         | 3.771647        | 1.00047434      | 2.184E-11       |
| 15D00258                 | 4.9 %  | ✓ | 5.349644  | 0.005121 | 0.346130   | 0.003194 | 0.001640  | 0.000020 | 67.093         | 3.772319        | 1.00047440      | 1.734E-11       |
| 15D00260                 | 5.2 %  | ✓ | 4.937795  | 0.004930 | 0.354077   | 0.003504 | 0.001519  | 0.000021 | 67.110         | 3.773561        | 1.00047452      | 1.447E-11       |
| 15D00261                 | 5.5 %  | ✓ | 4.400477  | 0.004928 | 0.358438   | 0.003705 | 0.001379  | 0.000021 | 67.119         | 3.774234        | 1.00047458      | 1.166E-11       |
| 15D00262                 | 5.8 %  | ✓ | 3.992933  | 0.004927 | 0.369000   | 0.004673 | 0.001258  | 0.000024 | 67.127         | 3.774856        | 1.00047464      | 8.767E-12       |
| 15D00264                 | 6.1 %  | ✓ | 3.516399  | 0.005054 | 0.371614   | 0.005313 | 0.001105  | 0.000029 | 67.144         | 3.776150        | 1.00047477      | 6.525E-12       |
| 15D00265                 | 6.5 %  | ✓ | 3.143463  | 0.005561 | 0.384717   | 0.006822 | 0.001053  | 0.000036 | 67.153         | 3.776824        | 1.00047483      | 4.483E-12       |
| 15D00266                 | 7.0 %  | ✓ | 2.203160  | 0.003907 | 0.388685   | 0.005569 | 0.000757  | 0.000029 | 67.162         | 3.777445        | 1.00047489      | 3.854E-12       |
| 15D00268                 | 7.6 %  | ✓ | 2.375300  | 0.006934 | 0.405106   | 0.010331 | 0.000814  | 0.000052 | 67.179         | 3.778741        | 1.00047501      | 2.295E-12       |
| 15D00269                 | 8.4 %  | ✓ | 1.462446  | 0.004459 | 0.480770   | 0.007894 | 0.000605  | 0.000038 | 67.188         | 3.779363        | 1.00047507      | 1.857E-12       |
| 15D00270                 | 9.4 %  | ✓ | 1.367272  | 0.006457 | 0.768800   | 0.012231 | 0.000645  | 0.000058 | 67.197         | 3.780037        | 1.00047513      | 1.152E-12       |
| 15D00272                 | 10.5 % | ✓ | 0.995108  | 0.007424 | 1.742271   | 0.015206 | 0.000892  | 0.000068 | 67.214         | 3.781333        | 1.00047526      | 6.965E-13       |
| 15D00273                 | 11.7 % | ✓ | 0.795243  | 0.008261 | 4.097160   | 0.023509 | 0.001614  | 0.000082 | 67.222         | 3.781956        | 1.00047531      | 4.873E-13       |
| 15D00274                 | 13.1 % | ✓ | 0.746315  | 0.012525 | 8.100226   | 0.049479 | 0.002950  | 0.000124 | 67.231         | 3.782578        | 1.00047537      | 3.019E-13       |
| 15D00276                 | 14.7 % | ✓ | 0.798020  | 0.016705 | 18.116470  | 0.127037 | 0.005890  | 0.000181 | 67.248         | 3.783876        | 1.00047550      | 2.417E-13       |
| 15D00277                 | 16.5 % | ✓ | 1.131216  | 0.024566 | 36.771312  | 0.310450 | 0.011965  | 0.000280 | 67.257         | 3.784551        | 1.00047556      | 2.399E-13       |
| 15D00278                 | 18.3 % | ✓ | 1.466956  | 0.047474 | 58.083580  | 0.914542 | 0.018570  | 0.000541 | 67.265         | 3.785174        | 1.00047562      | 1.702E-13       |
| 15D00280                 | 20.2 % | ✓ | 1.806578  | 0.046833 | 92.066137  | 1.351130 | 0.028718  | 0.000617 | 67.283         | 3.786472        | 1.00047574      | 2.225E-13       |
| 15D00281                 | 22.2 % | ✓ | 2.142198  | 0.066920 | 100.222367 | 1.910411 | 0.031460  | 0.000826 | 67.291         | 3.787095        | 1.00047580      | 1.936E-13       |
| 15D00283                 | 24.5 % | ✓ | 2.533027  | 0.061113 | 136.806397 | 2.264934 | 0.042186  | 0.000893 | 67.308         | 3.788394        | 1.00047592      | 2.731E-13       |



| Procedure<br>Blanks |        | 36Ar<br>[fA] | 1σ        | 37Ar<br>[fA] | 1σ        | 38Ar<br>[fA] | 1σ        | 39Ar<br>[fA] | 1σ        | 40Ar<br>[fA] | 1σ        |
|---------------------|--------|--------------|-----------|--------------|-----------|--------------|-----------|--------------|-----------|--------------|-----------|
| 15D00233            | 1.9 %  | 0.0289735    | 0.0007927 | 0.0622914    | 0.0437177 | 0.0721636    | 0.0287274 | 0.0097224    | 0.0253133 | 8.8306695    | 0.0968199 |
| 15D00234            | 2.0 %  | 0.0288273    | 0.0007927 | 0.0609016    | 0.0437177 | 0.0718102    | 0.0287274 | 0.0087978    | 0.0253133 | 8.8025163    | 0.0968199 |
| 15D00236            | 2.1 %  | 0.0286071    | 0.0007927 | 0.0580061    | 0.0437177 | 0.0710740    | 0.0287274 | 0.0068716    | 0.0253133 | 8.7523981    | 0.0968199 |
| 15D00237            | 2.2 %  | 0.0285319    | 0.0007927 | 0.0565005    | 0.0437177 | 0.0706911    | 0.0287274 | 0.0058700    | 0.0253133 | 8.7303586    | 0.0968199 |
| 15D00238            | 2.3 %  | 0.0284831    | 0.0007927 | 0.0551107    | 0.0437177 | 0.0703377    | 0.0287274 | 0.0049454    | 0.0253133 | 8.7121498    | 0.0968199 |
| 15D00240            | 2.4 %  | 0.0284350    | 0.0007927 | 0.0522153    | 0.0437177 | 0.0696015    | 0.0287274 | 0.0030192    | 0.0253133 | 8.6799178    | 0.0968199 |
| 15D00241            | 2.5 %  | 0.0284335    | 0.0007927 | 0.0508255    | 0.0437177 | 0.0692481    | 0.0287274 | 0.0020947    | 0.0253133 | 8.6667960    | 0.0968199 |
| 15D00242            | 2.6 %  | 0.0284446    | 0.0007927 | 0.0493199    | 0.0437177 | 0.0688653    | 0.0287274 | 0.0010930    | 0.0253133 | 8.6540301    | 0.0968199 |
| 15D00244            | 2.7 %  | 0.0284954    | 0.0007927 | 0.0464245    | 0.0437177 | 0.0681290    | 0.0287274 | 0.0008331    | 0.0253133 | 8.6329963    | 0.0968199 |
| 15D00245            | 2.8 %  | 0.0285299    | 0.0007927 | 0.0450347    | 0.0437177 | 0.0677756    | 0.0287274 | 0.0017577    | 0.0253133 | 8.6242328    | 0.0968199 |
| 15D00246            | 2.9 %  | 0.0285689    | 0.0007927 | 0.0436449    | 0.0437177 | 0.0674222    | 0.0287274 | 0.0026823    | 0.0253133 | 8.6161534    | 0.0968199 |
| 15D00248            | 3.0 %  | 0.0286589    | 0.0007927 | 0.0407494    | 0.0437177 | 0.0666860    | 0.0287274 | 0.0046085    | 0.0253133 | 8.6010042    | 0.0968199 |
| 15D00249            | 3.2 %  | 0.0287072    | 0.0007927 | 0.0392438    | 0.0437177 | 0.0663032    | 0.0287274 | 0.0056101    | 0.0253133 | 8.5937747    | 0.0968199 |
| 15D00250            | 3.4 %  | 0.0287512    | 0.0007927 | 0.0378540    | 0.0437177 | 0.0659498    | 0.0287274 | 0.0065347    | 0.0253133 | 8.5873606    | 0.0968199 |
| 15D00252            | 3.6 %  | 0.0288363    | 0.0007927 | 0.0349586    | 0.0437177 | 0.0652135    | 0.0287274 | 0.0084609    | 0.0253133 | 8.5744509    | 0.0968199 |
| 15D00253            | 3.8 %  | 0.0288723    | 0.0007927 | 0.0335688    | 0.0437177 | 0.0648602    | 0.0287274 | 0.0093854    | 0.0253133 | 8.5683346    | 0.0968199 |
| 15D00254            | 4.0 %  | 0.0289064    | 0.0007927 | 0.0320632    | 0.0437177 | 0.0644773    | 0.0287274 | 0.0103870    | 0.0253133 | 8.5616848    | 0.0968199 |
| 15D00256            | 4.3 %  | 0.0289555    | 0.0007927 | 0.0291678    | 0.0437177 | 0.0637411    | 0.0287274 | 0.0123132    | 0.0253133 | 8.5486536    | 0.0968199 |
| 15D00257            | 4.6 %  | 0.0289702    | 0.0007927 | 0.0277780    | 0.0437177 | 0.0633877    | 0.0287274 | 0.0132378    | 0.0253133 | 8.5422308    | 0.0968199 |
| 15D00258            | 4.9 %  | 0.0289791    | 0.0007927 | 0.0262723    | 0.0437177 | 0.0630048    | 0.0287274 | 0.0142394    | 0.0253133 | 8.5351301    | 0.0968199 |
| 15D00260            | 5.2 %  | 0.0289757    | 0.0007927 | 0.0234927    | 0.0437177 | 0.0622981    | 0.0287274 | 0.0160886    | 0.0253133 | 8.5216404    | 0.0968199 |
| 15D00261            | 5.5 %  | 0.0289628    | 0.0007927 | 0.0219871    | 0.0437177 | 0.0619152    | 0.0287274 | 0.0170902    | 0.0253133 | 8.5141611    | 0.0968199 |
| 15D00262            | 5.8 %  | 0.0289441    | 0.0007927 | 0.0205973    | 0.0437177 | 0.0615618    | 0.0287274 | 0.0180148    | 0.0253133 | 8.5071880    | 0.0968199 |
| 15D00264            | 6.1 %  | 0.0288848    | 0.0007927 | 0.0177019    | 0.0437177 | 0.0608256    | 0.0287274 | 0.0199409    | 0.0253133 | 8.4926345    | 0.0968199 |
| 15D00265            | 6.5 %  | 0.0288439    | 0.0007927 | 0.0161963    | 0.0437177 | 0.0604428    | 0.0287274 | 0.0209426    | 0.0253133 | 8.4851828    | 0.0968199 |
| 15D00266            | 7.0 %  | 0.0288006    | 0.0007927 | 0.0148065    | 0.0437177 | 0.0600894    | 0.0287274 | 0.0218671    | 0.0253133 | 8.4784717    | 0.0968199 |
| 15D00268            | 7.6 %  | 0.0286959    | 0.0007927 | 0.0119111    | 0.0437177 | 0.0593531    | 0.0287274 | 0.0237933    | 0.0253133 | 8.4653725    | 0.0968199 |
| 15D00269            | 8.4 %  | 0.0286402    | 0.0007927 | 0.0105213    | 0.0437177 | 0.0589997    | 0.0287274 | 0.0247179    | 0.0253133 | 8.4597067    | 0.0968199 |
| 15D00270            | 9.4 %  | 0.0285771    | 0.0007927 | 0.0090156    | 0.0437177 | 0.0586169    | 0.0287274 | 0.0257195    | 0.0253133 | 8.4541916    | 0.0968199 |
| 15D00272            | 10.5 % | 0.0284521    | 0.0007927 | 0.0061202    | 0.0437177 | 0.0578807    | 0.0287274 | 0.0276457    | 0.0253133 | 8.4459651    | 0.0968199 |
| 15D00273            | 11.7 % | 0.0283927    | 0.0007927 | 0.0047304    | 0.0437177 | 0.0575273    | 0.0287274 | 0.0285703    | 0.0253133 | 8.4434164    | 0.0968199 |
| 15D00274            | 13.1 % | 0.0283354    | 0.0007927 | 0.0033406    | 0.0437177 | 0.0571739    | 0.0287274 | 0.0294948    | 0.0253133 | 8.4419758    | 0.0968199 |
| 15D00276            | 14.7 % | 0.0282283    | 0.0007927 | 0.0004452    | 0.0437177 | 0.0564377    | 0.0287274 | 0.0314210    | 0.0253133 | 8.4432405    | 0.0968199 |
| 15D00277            | 16.5 % | 0.0281828    | 0.0007927 | 0.0010604    | 0.0437177 | 0.0560548    | 0.0287274 | 0.0324227    | 0.0253133 | 8.4465915    | 0.0968199 |
| 15D00278            | 18.3 % | 0.0281492    | 0.0007927 | 0.0024502    | 0.0437177 | 0.0557014    | 0.0287274 | 0.0333472    | 0.0253133 | 8.4515904    | 0.0968199 |
| 15D00280            | 20.2 % | 0.0281131    | 0.0007927 | 0.0053456    | 0.0437177 | 0.0549652    | 0.0287274 | 0.0352734    | 0.0253133 | 8.4687803    | 0.0968199 |
| 15D00281            | 22.2 % | 0.0281159    | 0.0007927 | 0.0067354    | 0.0437177 | 0.0546118    | 0.0287274 | 0.0361980    | 0.0253133 | 8.4807331    | 0.0968199 |
| 15D00283            | 24.5 % | 0.0281747    | 0.0007927 | 0.0096309    | 0.0437177 | 0.0538756    | 0.0287274 | 0.0381242    | 0.0253133 | 8.5146133    | 0.0968199 |



| OSU Argon Geochronology Lab |        |            |           |        |                |         |        |        |                |          |          |        |                |          |        |        |                |         |       |        |                |      |    |    |  |
|-----------------------------|--------|------------|-----------|--------|----------------|---------|--------|--------|----------------|----------|----------|--------|----------------|----------|--------|--------|----------------|---------|-------|--------|----------------|------|----|----|--|
| Intercept<br>Values         | 36Ar   |            |           |        |                | 37Ar    |        |        |                |          | 38Ar     |        |                |          |        | 39Ar   |                |         |       |        | 40Ar           |      |    |    |  |
|                             |        | [fA]       | 1σ        | r2     |                |         | [fA]   | 1σ     | r2             |          |          | [fA]   | 1σ             | r2       |        |        | [fA]           | 1σ      | r2    |        |                | [fA] | 1σ | r2 |  |
| 15D00233                    | 1.9 %  | 0.2201036  | 0.0011333 | 0.0464 | EXP 150 of 150 | 6.8981  | 0.0320 | 0.6135 | EXP 150 of 150 | 2.721294 | 0.026159 | 0.2852 | EXP 150 of 150 | 86.6766  | 0.0308 | 0.9971 | EXP 150 of 150 | 602.139 | 0.062 | 0.9993 | EXP 150 of 150 |      |    |    |  |
| 15D00234                    | 2.0 %  | 0.2089740  | 0.0010341 | 0.0209 | EXP 149 of 150 | 7.0256  | 0.0312 | 0.5852 | EXP 150 of 150 | 2.810719 | 0.026264 | 0.3248 | EXP 150 of 150 | 90.1083  | 0.0352 | 0.9964 | EXP 150 of 150 | 619.489 | 0.058 | 0.9994 | EXP 150 of 150 |      |    |    |  |
| 15D00236                    | 2.1 %  | 0.2081142  | 0.0010179 | 0.0176 | EXP 149 of 150 | 7.1297  | 0.0299 | 0.6692 | EXP 150 of 150 | 2.816763 | 0.028431 | 0.1893 | EXP 150 of 150 | 90.6273  | 0.0324 | 0.9970 | EXP 150 of 150 | 621.197 | 0.059 | 0.9994 | EXP 150 of 150 |      |    |    |  |
| 15D00237                    | 2.2 %  | 0.1992102  | 0.0010487 | 0.0591 | EXP 150 of 150 | 6.6327  | 0.0304 | 0.5908 | EXP 150 of 150 | 2.713318 | 0.024631 | 0.3974 | EXP 150 of 150 | 85.2746  | 0.0338 | 0.9963 | EXP 150 of 150 | 584.740 | 0.061 | 0.9993 | EXP 150 of 150 |      |    |    |  |
| 15D00238                    | 2.3 %  | 0.1926744  | 0.0010540 | 0.0074 | EXP 149 of 150 | 6.5284  | 0.0285 | 0.6119 | EXP 150 of 150 | 2.653598 | 0.027450 | 0.2887 | EXP 150 of 150 | 83.1006  | 0.0317 | 0.9967 | EXP 150 of 150 | 568.752 | 0.062 | 0.9992 | EXP 150 of 150 |      |    |    |  |
| 15D00240                    | 2.4 %  | 0.2151675  | 0.0010269 | 0.0839 | EXP 150 of 150 | 7.3199  | 0.0278 | 0.6504 | EXP 150 of 150 | 3.006640 | 0.023936 | 0.3862 | EXP 150 of 150 | 94.2548  | 0.0303 | 0.9976 | EXP 150 of 150 | 643.513 | 0.055 | 0.9996 | EXP 150 of 150 |      |    |    |  |
| 15D00241                    | 2.5 %  | 0.1914239  | 0.0011498 | 0.0102 | EXP 150 of 150 | 6.5994  | 0.0322 | 0.5387 | EXP 150 of 150 | 2.652997 | 0.023719 | 0.3120 | EXP 150 of 150 | 83.2124  | 0.0316 | 0.9966 | EXP 150 of 150 | 567.745 | 0.060 | 0.9993 | EXP 150 of 150 |      |    |    |  |
| 15D00242                    | 2.6 %  | 0.1991241  | 0.0010250 | 0.0087 | EXP 150 of 150 | 6.9493  | 0.0272 | 0.6169 | EXP 150 of 150 | 2.803801 | 0.022789 | 0.3053 | EXP 150 of 150 | 87.9042  | 0.0315 | 0.9970 | EXP 150 of 150 | 596.160 | 0.064 | 0.9992 | EXP 150 of 150 |      |    |    |  |
| 15D00244                    | 2.7 %  | 0.1938097  | 0.0010159 | 0.0000 | EXP 150 of 150 | 6.9280  | 0.0303 | 0.5629 | EXP 150 of 150 | 2.771918 | 0.026301 | 0.1900 | EXP 150 of 150 | 86.9139  | 0.0343 | 0.9964 | EXP 150 of 150 | 586.633 | 0.055 | 0.9994 | EXP 150 of 150 |      |    |    |  |
| 15D00245                    | 2.8 %  | 0.1877177  | 0.0009341 | 0.0132 | EXP 150 of 150 | 6.6507  | 0.0290 | 0.6293 | EXP 150 of 150 | 2.702821 | 0.027217 | 0.3198 | EXP 150 of 150 | 83.1690  | 0.0322 | 0.9965 | EXP 150 of 150 | 559.193 | 0.062 | 0.9992 | EXP 150 of 150 |      |    |    |  |
| 15D00246                    | 2.9 %  | 0.1846030  | 0.0011541 | 0.0023 | EXP 150 of 150 | 6.6045  | 0.0287 | 0.6150 | EXP 150 of 150 | 2.648439 | 0.026241 | 0.3390 | EXP 150 of 150 | 81.5954  | 0.0361 | 0.9954 | EXP 150 of 150 | 546.051 | 0.057 | 0.9993 | EXP 150 of 150 |      |    |    |  |
| 15D00248                    | 3.0 %  | 0.2015602  | 0.0009553 | 0.0594 | EXP 150 of 150 | 7.5811  | 0.0302 | 0.6614 | EXP 150 of 150 | 2.958071 | 0.025253 | 0.2729 | EXP 150 of 150 | 91.7664  | 0.0350 | 0.9966 | EXP 150 of 150 | 604.983 | 0.061 | 0.9993 | EXP 150 of 150 |      |    |    |  |
| 15D00249                    | 3.2 %  | 0.2583618  | 0.0012072 | 0.0359 | EXP 150 of 150 | 10.4734 | 0.0298 | 0.7736 | EXP 150 of 150 | 4.198275 | 0.027898 | 0.3815 | EXP 150 of 150 | 126.8027 | 0.0319 | 0.9985 | EXP 150 of 150 | 811.290 | 0.066 | 0.9996 | EXP 150 of 150 |      |    |    |  |
| 15D00250                    | 3.4 %  | 0.2169365  | 0.0010738 | 0.0482 | EXP 150 of 150 | 8.7229  | 0.0307 | 0.7127 | EXP 150 of 150 | 3.416756 | 0.026063 | 0.4031 | EXP 150 of 150 | 103.4752 | 0.0325 | 0.9977 | EXP 150 of 150 | 660.531 | 0.066 | 0.9994 | EXP 150 of 150 |      |    |    |  |
| 15D00252                    | 3.6 %  | 0.22219741 | 0.0011165 | 0.0302 | EXP 150 of 150 | 9.4248  | 0.0293 | 0.7671 | EXP 150 of 150 | 3.632119 | 0.026956 | 0.3497 | EXP 150 of 150 | 109.1271 | 0.0343 | 0.9977 | EXP 150 of 150 | 686.704 | 0.062 | 0.9995 | EXP 150 of 150 |      |    |    |  |
| 15D00253                    | 3.8 %  | 0.1440127  | 0.0009651 | 0.0400 | EXP 150 of 150 | 5.6095  | 0.0298 | 0.4482 | EXP 150 of 150 | 2.149032 | 0.025884 | 0.1699 | EXP 150 of 150 | 65.2509  | 0.0315 | 0.9945 | EXP 150 of 150 | 416.547 | 0.053 | 0.9987 | EXP 150 of 150 |      |    |    |  |
| 15D00254                    | 4.0 %  | 0.1799359  | 0.0010789 | 0.0043 | EXP 150 of 150 | 7.5894  | 0.0280 | 0.6892 | EXP 150 of 150 | 2.929147 | 0.024117 | 0.3642 | EXP 150 of 150 | 86.8794  | 0.0291 | 0.9974 | EXP 150 of 150 | 537.268 | 0.056 | 0.9992 | EXP 150 of 150 |      |    |    |  |
| 15D00256                    | 4.3 %  | 0.1398251  | 0.0009320 | 0.0435 | EXP 150 of 150 | 5.8784  | 0.0306 | 0.5213 | EXP 150 of 150 | 2.158133 | 0.027380 | 0.1636 | EXP 150 of 150 | 65.6215  | 0.0311 | 0.9947 | EXP 150 of 150 | 402.255 | 0.049 | 0.9988 | EXP 150 of 150 |      |    |    |  |
| 15D00257                    | 4.6 %  | 0.1597728  | 0.0010306 | 0.0036 | EXP 150 of 150 | 7.3724  | 0.0296 | 0.6508 | EXP 150 of 150 | 2.752554 | 0.028161 | 0.2029 | EXP 150 of 150 | 81.3518  | 0.0307 | 0.9967 | EXP 150 of 150 | 464.983 | 0.052 | 0.9991 | EXP 150 of 150 |      |    |    |  |
| 15D00258                    | 4.9 %  | 0.1328441  | 0.0008912 | 0.0225 | EXP 150 of 150 | 6.1020  | 0.0301 | 0.5295 | EXP 150 of 150 | 2.257048 | 0.025889 | 0.1803 | EXP 150 of 150 | 67.0659  | 0.0298 | 0.9954 | EXP 150 of 150 | 370.806 | 0.048 | 0.9985 | EXP 150 of 150 |      |    |    |  |
| 15D00260                    | 5.2 %  | 0.1159781  | 0.0008810 | 0.0173 | EXP 150 of 150 | 5.6411  | 0.0299 | 0.4650 | EXP 150 of 150 | 2.023379 | 0.026812 | 0.1317 | EXP 150 of 150 | 60.6406  | 0.0277 | 0.9951 | EXP 150 of 150 | 310.851 | 0.047 | 0.9978 | EXP 150 of 150 |      |    |    |  |
| 15D00261                    | 5.5 %  | 0.1003483  | 0.0007260 | 0.0843 | EXP 150 of 150 | 5.1632  | 0.0259 | 0.5460 | EXP 150 of 150 | 1.799271 | 0.025126 | 0.1762 | EXP 150 of 150 | 54.8354  | 0.0332 | 0.9917 | EXP 150 of 150 | 252.140 | 0.042 | 0.9965 | EXP 150 of 150 |      |    |    |  |
| 15D00262                    | 5.8 %  | 0.0829170  | 0.0006619 | 0.1796 | EXP 149 of 150 | 4.4060  | 0.0315 | 0.3367 | EXP 150 of 150 | 1.464729 | 0.027780 | 0.1329 | EXP 150 of 150 | 45.4463  | 0.0288 | 0.9907 | EXP 150 of 150 | 191.703 | 0.038 | 0.9924 | EXP 149 of 150 |      |    |    |  |
| 15D00264                    | 6.1 %  | 0.0689554  | 0.0006851 | 0.2232 | EXP 150 of 150 | 3.7490  | 0.0283 | 0.3322 | EXP 150 of 150 | 1.194799 | 0.025600 | 0.0815 | EXP 150 of 150 | 38.4137  | 0.0291 | 0.9866 | EXP 150 of 150 | 144.843 | 0.035 | 0.9787 | EXP 150 of 150 |      |    |    |  |
| 15D00265                    | 6.5 %  | 0.0581777  | 0.0005984 | 0.2158 | EXP 150 of 150 | 2.9845  | 0.0278 | 0.2977 | EXP 150 of 150 | 0.868240 | 0.025730 | 0.0466 | EXP 150 of 150 | 29.5286  | 0.0245 | 0.9834 | EXP 150 of 150 | 102.164 | 0.036 | 0.4391 | EXP 150 of 150 |      |    |    |  |
| 15D00266                    | 7.0 %  | 0.0546813  | 0.0005574 | 0.3929 | EXP 150 of 150 | 3.6922  | 0.0271 | 0.3210 | EXP 149 of 150 | 0.987118 | 0.027573 | 0.0225 | EXP 150 of 150 | 36.2112  | 0.0267 | 0.9872 | EXP 150 of 150 | 89.002  | 0.034 | 0.4300 | EXP 150 of 150 |      |    |    |  |
| 15D00268                    | 7.6 %  | 0.0440648  | 0.0005881 | 0.3460 | EXP 150 of 150 | 2.1288  | 0.0308 | 0.0503 | EXP 150 of 150 | 0.533298 | 0.025257 | 0.0175 | EXP 150 of 150 | 20.0184  | 0.0278 | 0.9536 | EXP 150 of 150 | 56.431  | 0.031 | 0.9642 | EXP 150 of 150 |      |    |    |  |
| 15D00269                    | 8.4 %  | 0.0436454  | 0.0005017 | 0.4252 | EXP 149 of 150 | 3.3108  | 0.0302 | 0.2708 | EXP 150 of 150 | 0.580153 | 0.026042 | 0.0018 | EXP 150 of 150 | 26.2957  | 0.0263 | 0.9757 | EXP 150 of 150 | 47.262  | 0.031 | 0.9769 | EXP 150 of 150 |      |    |    |  |
| 15D00270                    | 9.4 %  | 0.0392038  | 0.0005412 | 0.4420 | EXP 150 of 150 | 3.5102  | 0.0321 | 0.3366 | EXP 150 of 150 | 0.359101 | 0.029651 | 0.0031 | EXP 150 of 150 | 17.4575  | 0.0262 | 0.9445 | EXP 150 of 150 | 32.525  | 0.027 | 0.9900 | EXP 150 of 150 |      |    |    |  |
| 15D00272                    | 10.5 % | 0.0406505  | 0.0004826 | 0.4339 | EXP 150 of 150 | 6.5956  | 0.0271 | 0.5600 | EXP 148 of 150 | 0.217029 | 0.028269 | 0.0086 | EXP 150 of 150 | 14.5095  | 0.0275 | 0.9161 | EXP 149 of 150 | 23.000  | 0.030 | 0.9906 | EXP 150 of 150 |      |    |    |  |
| 15D00273                    | 11.7 % | 0.0477224  | 0.0005665 | 0.2687 | EXP 150 of 150 | 13.5682 | 0.0316 | 0.8430 | EXP 150 of 150 | 0.206342 | 0.030669 | 0.0009 | EXP 150 of 150 | 12.7065  | 0.0270 | 0.8912 | EXP 150 of 150 | 18.626  | 0.030 | 0.9921 | EXP 150 of 150 |      |    |    |  |
| 15D00274                    | 13.1 % | 0.0516561  | 0.0005645 | 0.2585 | EXP 149 of 150 | 17.7031 | 0.0315 | 0.9092 | EXP 150 of 150 | 0.122622 | 0.026474 | 0.0005 | EXP 150 of 150 | 8.3991   | 0.0269 | 0.7753 | EXP 150 of 150 | 14.750  | 0.032 | 0.9916 | EXP 150 of 150 |      |    |    |  |
| 15D00276                    | 14.7 % | 0.0630818  | 0.0006728 | 0.1174 | EXP 150 of 150 | 29.6241 | 0.0314 | 0.9654 | EXP 150 of 150 | 0.112856 | 0.024477 | 0.0131 | EXP 150 of 150 | 6.2968   | 0.0287 | 0.6165 | EXP 150 of 150 | 13.493  | 0.029 | 0.9933 | EXP 150 of 150 |      |    |    |  |
| 15D00277                    | 16.5 % | 0.0777592  | 0.0007309 | 0.0172 | EXP 150 of 150 | 42.0921 | 0.0326 | 0.9813 | EXP 150 of 150 | 0.030438 | 0.028766 | 0.0110 | EXP 150 of 150 | 4.4194   | 0.0231 | 0.4117 | EXP 150 of 150 | 13.459  | 0.030 | 0.9925 | EXP 150 of 150 |      |    |    |  |
| 15D00278                    | 18.3 % | 0.0702428  | 0.0006595 | 0.0655 | EXP 150 of 150 | 36.3660 | 0.0348 | 0.9715 | EXP 150 of 150 | 0.048413 | 0.026177 | 0.0051 | EXP 150 of 150 | 2.4333   | 0.0269 | 0.0752 | EXP 149 of 150 | 12.007  | 0.029 | 0.9931 | EXP 150 of 150 |      |    |    |  |
| 15D00280                    | 20.2 % | 0.0972176  | 0.0007336 | 0.0011 | EXP 150 of 150 | 61.1682 | 0.0329 | 0.9910 | EXP 150 of 150 | 0.043911 | 0.025186 | 0.0    |                |          |        |        |                |         |       |        |                |      |    |    |  |







[illegible]



| Irradiation<br>Constants |        | 40/36(a) |   | 40/36(c) |    | 38/36(a) |   | 38/36(c) |   | 39/37(ca) |   | 38/37(ca) |   | 36/37(ca) |   | 40/39(k) |   | 38/39(k) |   | 36/38(cl) |   | K/Ca |   | K/Cl |   | Ca/Cl |   |
|--------------------------|--------|----------|---|----------|----|----------|---|----------|---|-----------|---|-----------|---|-----------|---|----------|---|----------|---|-----------|---|------|---|------|---|-------|---|
|                          |        | %1σ      | 0 | %1σ      | 0  | %1σ      | 0 | %1σ      | 0 | %1σ       | 0 | %1σ       | 0 | %1σ       | 0 | %1σ      | 0 | %1σ      | 0 | %1σ       | 0 | %1σ  | 0 | %1σ  | 0 | %1σ   | 0 |
| 15D00233                 | 1.9 %  | 295.5    | 0 | 0.018    | 35 | 0.1869   | 0 | 1.493    | 3 | 0.000673  | 0 | 0.0000139 | 0 | 0.000264  | 0 | 0.00101  | 0 | 0.01138  | 0 | 0         | 0 | 0.43 | 0 | 0    | 0 | 0     | 0 |
| 15D00234                 | 2.0 %  | 295.5    | 0 | 0.018    | 35 | 0.1869   | 0 | 1.493    | 3 | 0.000673  | 0 | 0.0000139 | 0 | 0.000264  | 0 | 0.00101  | 0 | 0.01138  | 0 | 0         | 0 | 0.43 | 0 | 0    | 0 | 0     | 0 |
| 15D00236                 | 2.1 %  | 295.5    | 0 | 0.018    | 35 | 0.1869   | 0 | 1.493    | 3 | 0.000673  | 0 | 0.0000139 | 0 | 0.000264  | 0 | 0.00101  | 0 | 0.01138  | 0 | 0         | 0 | 0.43 | 0 | 0    | 0 | 0     | 0 |
| 15D00237                 | 2.2 %  | 295.5    | 0 | 0.018    | 35 | 0.1869   | 0 | 1.493    | 3 | 0.000673  | 0 | 0.0000139 | 0 | 0.000264  | 0 | 0.00101  | 0 | 0.01138  | 0 | 0         | 0 | 0.43 | 0 | 0    | 0 | 0     | 0 |
| 15D00238                 | 2.3 %  | 295.5    | 0 | 0.018    | 35 | 0.1869   | 0 | 1.493    | 3 | 0.000673  | 0 | 0.0000139 | 0 | 0.000264  | 0 | 0.00101  | 0 | 0.01138  | 0 | 0         | 0 | 0.43 | 0 | 0    | 0 | 0     | 0 |
| 15D00240                 | 2.4 %  | 295.5    | 0 | 0.018    | 35 | 0.1869   | 0 | 1.493    | 3 | 0.000673  | 0 | 0.0000139 | 0 | 0.000264  | 0 | 0.00101  | 0 | 0.01138  | 0 | 0         | 0 | 0.43 | 0 | 0    | 0 | 0     | 0 |
| 15D00241                 | 2.5 %  | 295.5    | 0 | 0.018    | 35 | 0.1869   | 0 | 1.493    | 3 | 0.000673  | 0 | 0.0000139 | 0 | 0.000264  | 0 | 0.00101  | 0 | 0.01138  | 0 | 0         | 0 | 0.43 | 0 | 0    | 0 | 0     | 0 |
| 15D00242                 | 2.6 %  | 295.5    | 0 | 0.018    | 35 | 0.1869   | 0 | 1.493    | 3 | 0.000673  | 0 | 0.0000139 | 0 | 0.000264  | 0 | 0.00101  | 0 | 0.01138  | 0 | 0         | 0 | 0.43 | 0 | 0    | 0 | 0     | 0 |
| 15D00244                 | 2.7 %  | 295.5    | 0 | 0.018    | 35 | 0.1869   | 0 | 1.493    | 3 | 0.000673  | 0 | 0.0000139 | 0 | 0.000264  | 0 | 0.00101  | 0 | 0.01138  | 0 | 0         | 0 | 0.43 | 0 | 0    | 0 | 0     | 0 |
| 15D00245                 | 2.8 %  | 295.5    | 0 | 0.018    | 35 | 0.1869   | 0 | 1.493    | 3 | 0.000673  | 0 | 0.0000139 | 0 | 0.000264  | 0 | 0.00101  | 0 | 0.01138  | 0 | 0         | 0 | 0.43 | 0 | 0    | 0 | 0     | 0 |
| 15D00246                 | 2.9 %  | 295.5    | 0 | 0.018    | 35 | 0.1869   | 0 | 1.493    | 3 | 0.000673  | 0 | 0.0000139 | 0 | 0.000264  | 0 | 0.00101  | 0 | 0.01138  | 0 | 0         | 0 | 0.43 | 0 | 0    | 0 | 0     | 0 |
| 15D00248                 | 3.0 %  | 295.5    | 0 | 0.018    | 35 | 0.1869   | 0 | 1.493    | 3 | 0.000673  | 0 | 0.0000139 | 0 | 0.000264  | 0 | 0.00101  | 0 | 0.01138  | 0 | 0         | 0 | 0.43 | 0 | 0    | 0 | 0     | 0 |
| 15D00249                 | 3.2 %  | 295.5    | 0 | 0.018    | 35 | 0.1869   | 0 | 1.493    | 3 | 0.000673  | 0 | 0.0000139 | 0 | 0.000264  | 0 | 0.00101  | 0 | 0.01138  | 0 | 0         | 0 | 0.43 | 0 | 0    | 0 | 0     | 0 |
| 15D00250                 | 3.4 %  | 295.5    | 0 | 0.018    | 35 | 0.1869   | 0 | 1.493    | 3 | 0.000673  | 0 | 0.0000139 | 0 | 0.000264  | 0 | 0.00101  | 0 | 0.01138  | 0 | 0         | 0 | 0.43 | 0 | 0    | 0 | 0     | 0 |
| 15D00252                 | 3.6 %  | 295.5    | 0 | 0.018    | 35 | 0.1869   | 0 | 1.493    | 3 | 0.000673  | 0 | 0.0000139 | 0 | 0.000264  | 0 | 0.00101  | 0 | 0.01138  | 0 | 0         | 0 | 0.43 | 0 | 0    | 0 | 0     | 0 |
| 15D00253                 | 3.8 %  | 295.5    | 0 | 0.018    | 35 | 0.1869   | 0 | 1.493    | 3 | 0.000673  | 0 | 0.0000139 | 0 | 0.000264  | 0 | 0.00101  | 0 | 0.01138  | 0 | 0         | 0 | 0.43 | 0 | 0    | 0 | 0     | 0 |
| 15D00254                 | 4.0 %  | 295.5    | 0 | 0.018    | 35 | 0.1869   | 0 | 1.493    | 3 | 0.000673  | 0 | 0.0000139 | 0 | 0.000264  | 0 | 0.00101  | 0 | 0.01138  | 0 | 0         | 0 | 0.43 | 0 | 0    | 0 | 0     | 0 |
| 15D00256                 | 4.3 %  | 295.5    | 0 | 0.018    | 35 | 0.1869   | 0 | 1.493    | 3 | 0.000673  | 0 | 0.0000139 | 0 | 0.000264  | 0 | 0.00101  | 0 | 0.01138  | 0 | 0         | 0 | 0.43 | 0 | 0    | 0 | 0     | 0 |
| 15D00257                 | 4.6 %  | 295.5    | 0 | 0.018    | 35 | 0.1869   | 0 | 1.493    | 3 | 0.000673  | 0 | 0.0000139 | 0 | 0.000264  | 0 | 0.00101  | 0 | 0.01138  | 0 | 0         | 0 | 0.43 | 0 | 0    | 0 | 0     | 0 |
| 15D00258                 | 4.9 %  | 295.5    | 0 | 0.018    | 35 | 0.1869   | 0 | 1.493    | 3 | 0.000673  | 0 | 0.0000139 | 0 | 0.000264  | 0 | 0.00101  | 0 | 0.01138  | 0 | 0         | 0 | 0.43 | 0 | 0    | 0 | 0     | 0 |
| 15D00260                 | 5.2 %  | 295.5    | 0 | 0.018    | 35 | 0.1869   | 0 | 1.493    | 3 | 0.000673  | 0 | 0.0000139 | 0 | 0.000264  | 0 | 0.00101  | 0 | 0.01138  | 0 | 0         | 0 | 0.43 | 0 | 0    | 0 | 0     | 0 |
| 15D00261                 | 5.5 %  | 295.5    | 0 | 0.018    | 35 | 0.1869   | 0 | 1.493    | 3 | 0.000673  | 0 | 0.0000139 | 0 | 0.000264  | 0 | 0.00101  | 0 | 0.01138  | 0 | 0         | 0 | 0.43 | 0 | 0    | 0 | 0     | 0 |
| 15D00262                 | 5.8 %  | 295.5    | 0 | 0.018    | 35 | 0.1869   | 0 | 1.493    | 3 | 0.000673  | 0 | 0.0000139 | 0 | 0.000264  | 0 | 0.00101  | 0 | 0.01138  | 0 | 0         | 0 | 0.43 | 0 | 0    | 0 | 0     | 0 |
| 15D00264                 | 6.1 %  | 295.5    | 0 | 0.018    | 35 | 0.1869   | 0 | 1.493    | 3 | 0.000673  | 0 | 0.0000139 | 0 | 0.000264  | 0 | 0.00101  | 0 | 0.01138  | 0 | 0         | 0 | 0.43 | 0 | 0    | 0 | 0     | 0 |
| 15D00265                 | 6.5 %  | 295.5    | 0 | 0.018    | 35 | 0.1869   | 0 | 1.493    | 3 | 0.000673  | 0 | 0.0000139 | 0 | 0.000264  | 0 | 0.00101  | 0 | 0.01138  | 0 | 0         | 0 | 0.43 | 0 | 0    | 0 | 0     | 0 |
| 15D00266                 | 7.0 %  | 295.5    | 0 | 0.018    | 35 | 0.1869   | 0 | 1.493    | 3 | 0.000673  | 0 | 0.0000139 | 0 | 0.000264  | 0 | 0.00101  | 0 | 0.01138  | 0 | 0         | 0 | 0.43 | 0 | 0    | 0 | 0     | 0 |
| 15D00268                 | 7.6 %  | 295.5    | 0 | 0.018    | 35 | 0.1869   | 0 | 1.493    | 3 | 0.000673  | 0 | 0.0000139 | 0 | 0.000264  | 0 | 0.00101  | 0 | 0.01138  | 0 | 0         | 0 | 0.43 | 0 | 0    | 0 | 0     | 0 |
| 15D00269                 | 8.4 %  | 295.5    | 0 | 0.018    | 35 | 0.1869   | 0 | 1.493    | 3 | 0.000673  | 0 | 0.0000139 | 0 | 0.000264  | 0 | 0.00101  | 0 | 0.01138  | 0 | 0         | 0 | 0.43 | 0 | 0    | 0 | 0     | 0 |
| 15D00270                 | 9.4 %  | 295.5    | 0 | 0.018    | 35 | 0.1869   | 0 | 1.493    | 3 | 0.000673  | 0 | 0.0000139 | 0 | 0.000264  | 0 | 0.00101  | 0 | 0.01138  | 0 | 0         | 0 | 0.43 | 0 | 0    | 0 | 0     | 0 |
| 15D00272                 | 10.5 % | 295.5    | 0 | 0.018    | 35 | 0.1869   | 0 | 1.493    | 3 | 0.000673  | 0 | 0.0000139 | 0 | 0.000264  | 0 | 0.00101  | 0 | 0.01138  | 0 | 0         | 0 | 0.43 | 0 | 0    | 0 | 0     | 0 |
| 15D00273                 | 11.7 % | 295.5    | 0 | 0.018    | 35 | 0.1869   | 0 | 1.493    | 3 | 0.000673  | 0 | 0.0000139 | 0 | 0.000264  | 0 | 0.00101  | 0 | 0.01138  | 0 | 0         | 0 | 0.43 | 0 | 0    | 0 | 0     | 0 |
| 15D00274                 | 13.1 % | 295.5    | 0 | 0.018    | 35 | 0.1869   | 0 | 1.493    | 3 | 0.000673  | 0 | 0.0000139 | 0 | 0.000264  | 0 | 0.00101  | 0 | 0.01138  | 0 | 0         | 0 | 0.43 | 0 | 0    | 0 | 0     | 0 |
| 15D00276                 | 14.7 % | 295.5    | 0 | 0.018    | 35 | 0.1869   | 0 | 1.493    | 3 | 0.000673  | 0 | 0.0000139 | 0 | 0.000264  | 0 | 0.00101  | 0 | 0.01138  | 0 | 0         | 0 | 0.43 | 0 | 0    | 0 | 0     | 0 |
| 15D00277                 | 16.5 % | 295.5    | 0 | 0.018    | 35 | 0.1869   | 0 | 1.493    | 3 | 0.000673  | 0 | 0.0000139 | 0 | 0.000264  | 0 | 0.00101  | 0 | 0.01138  | 0 | 0         | 0 | 0.43 | 0 | 0    | 0 | 0     | 0 |
| 15D00278                 | 18.3 % | 295.5    | 0 | 0.018    | 35 | 0.1869   | 0 | 1.493    | 3 | 0.000673  | 0 | 0.0000139 | 0 | 0.000264  | 0 | 0.00101  | 0 | 0.01138  | 0 | 0         | 0 | 0.43 | 0 | 0    | 0 | 0     | 0 |
| 15D00280                 | 20.2 % | 295.5    | 0 | 0.018    | 35 | 0.1869   | 0 | 1.493    | 3 | 0.000673  | 0 | 0.0000139 | 0 | 0.000264  | 0 | 0.00101  | 0 | 0.01138  | 0 | 0         | 0 | 0.43 | 0 | 0    | 0 | 0     | 0 |
| 15D00281                 | 22.2 % | 295.5    | 0 | 0.018    | 35 | 0.1869   | 0 | 1.493    | 3 | 0.000673  | 0 | 0.0000139 | 0 | 0.000264  | 0 | 0.00101  | 0 | 0.01138  | 0 | 0         | 0 | 0.43 | 0 | 0    | 0 | 0     | 0 |
| 15D00283                 | 24.5 % | 295.5    | 0 | 0.018    | 35 | 0.1869   | 0 | 1.493    | 3 | 0.000673  | 0 | 0.0000139 | 0 | 0.000264  | 0 | 0.00101  | 0 | 0.01138  | 0 | 0         | 0 | 0.43 | 0 | 0    | 0 | 0     | 0 |



15D00232.AGE >>> CAPTAINS SAMPLE >>> KERGUELEN | FALLOON (14-PIL-01) PROJECT

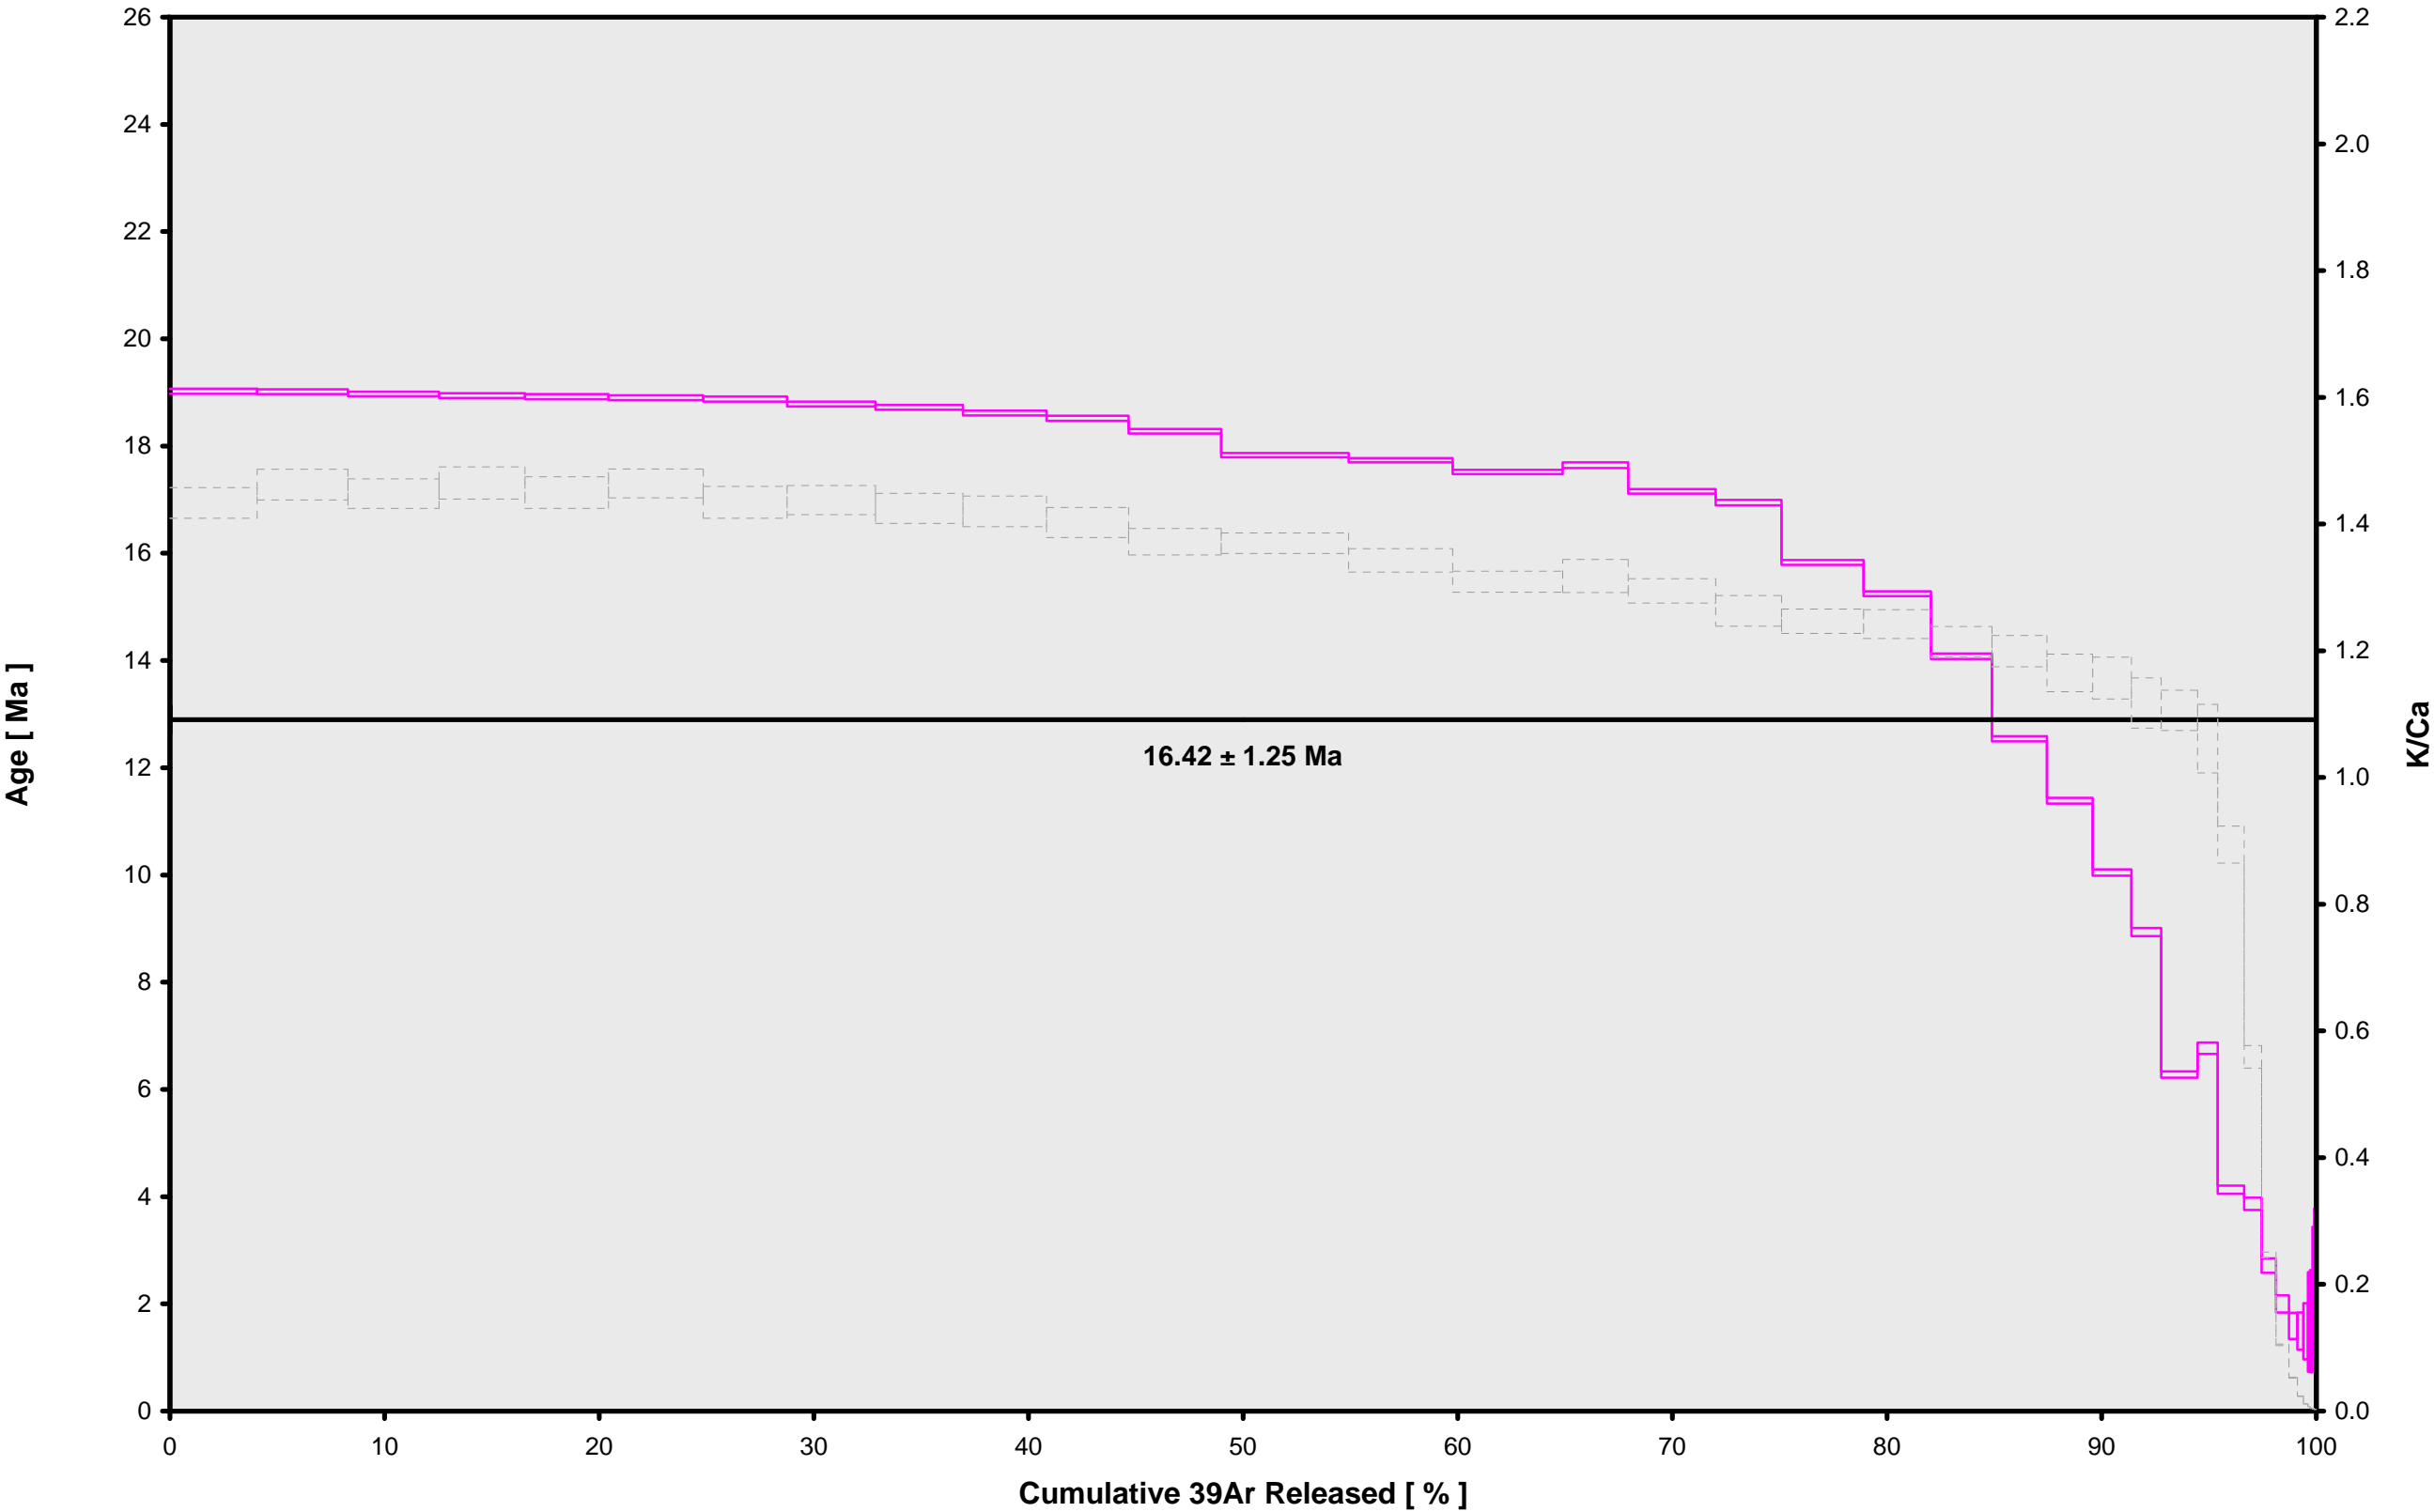

**Ar-Ages in Ma**

**WEIGHTED PLATEAU**

16.42 ± 1.25

**TOTAL FUSION**

16.44 ± 0.08

**NORMAL ISOCHRON**

-65.87 ± 25.96 (NEG)

**INVERSE ISOCHRON**

0.09 ± 0.03

**MSWD (PROBABILITY)**

> 100 (0%)

**Sample Info**

Groundmass

Kerguelen Plateau

Anthony Koppers

IRR = 14-OSU-06 (6C15-14)

J = 0.00173028 ± 0.00000443



15D00232.AGE >>> CAPTAINS SAMPLE >>> KERGUELEN | FALLOON (14-PIL-01) PROJECT

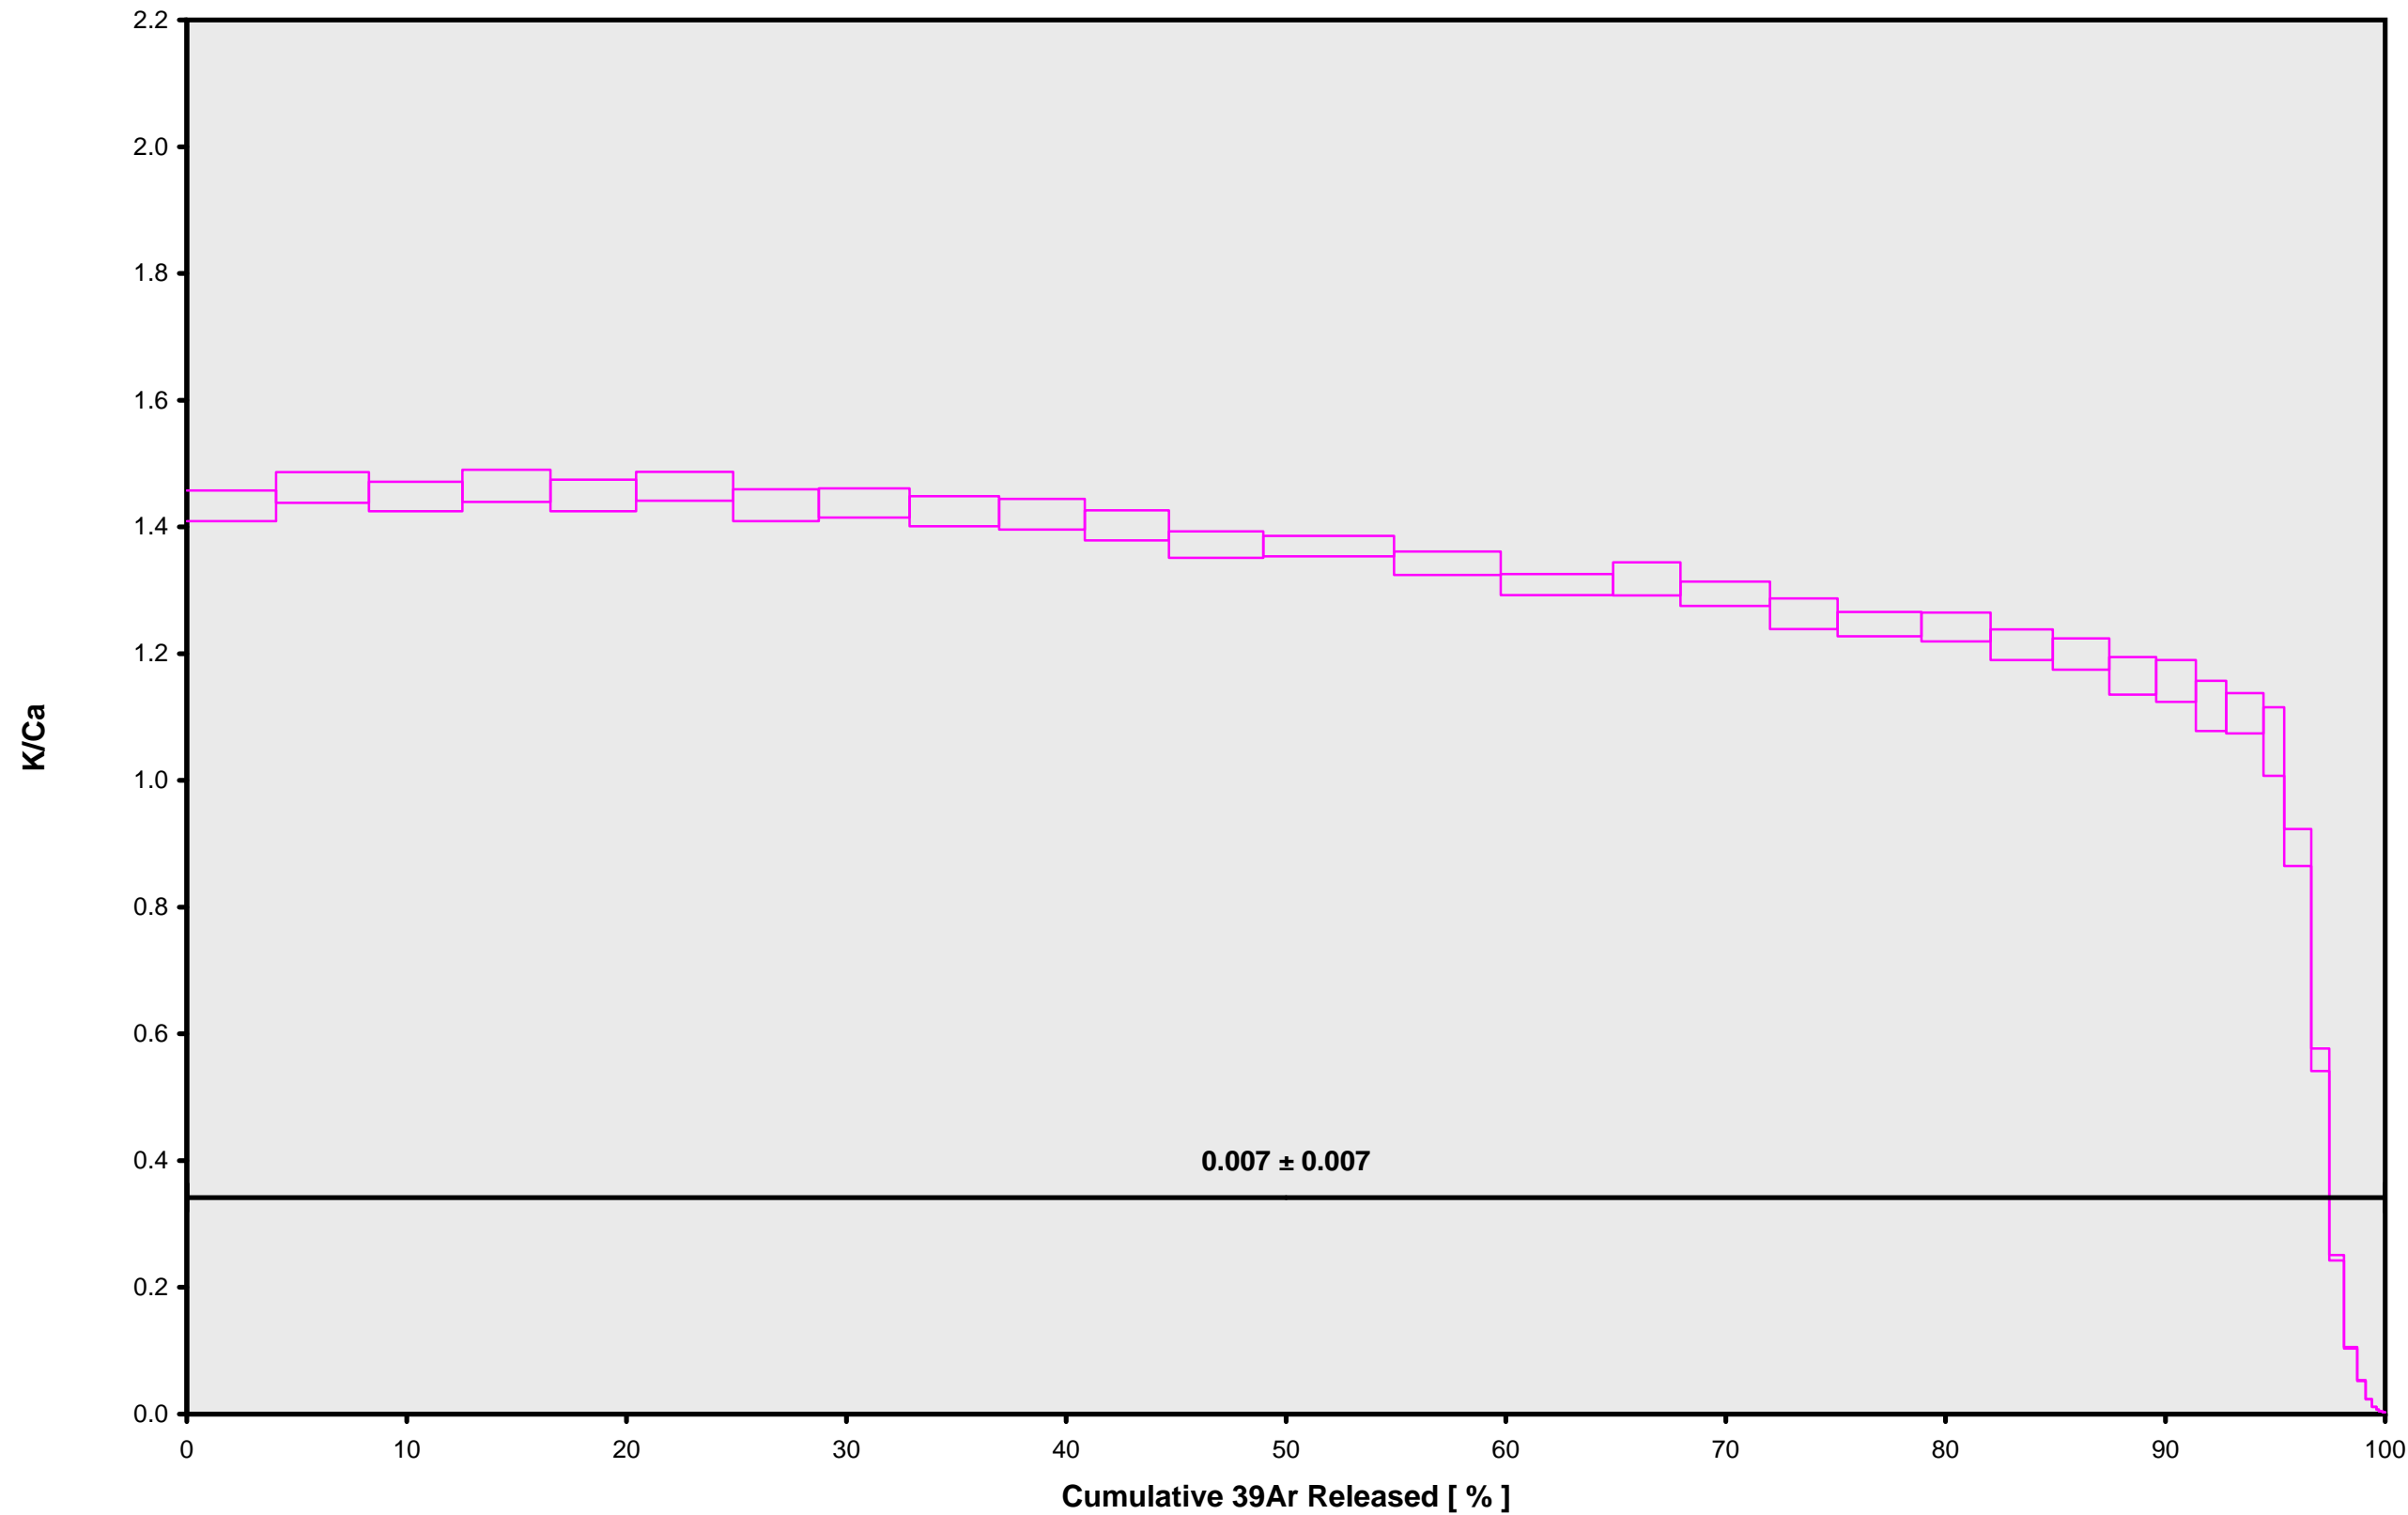

**Ar-Ages in Ma**

**WEIGHTED PLATEAU**  
 $16.42 \pm 1.25$

**TOTAL FUSION**  
 $16.44 \pm 0.08$

**NORMAL ISOCHRON**  
 $-65.87 \pm 25.96$  (NEG)

**INVERSE ISOCHRON**  
 $0.09 \pm 0.03$

**Sample Info**

Groundmass  
Kerguelen Plateau  
Anthony Koppers

IRR = 14-OSU-06 (6C15-14)  
J =  $0.00173028 \pm 0.00000443$



15D00232.AGE >>> CAPTAINS SAMPLE >>> KERGUELEN | FALLOON (14-PIL-01) PROJECT

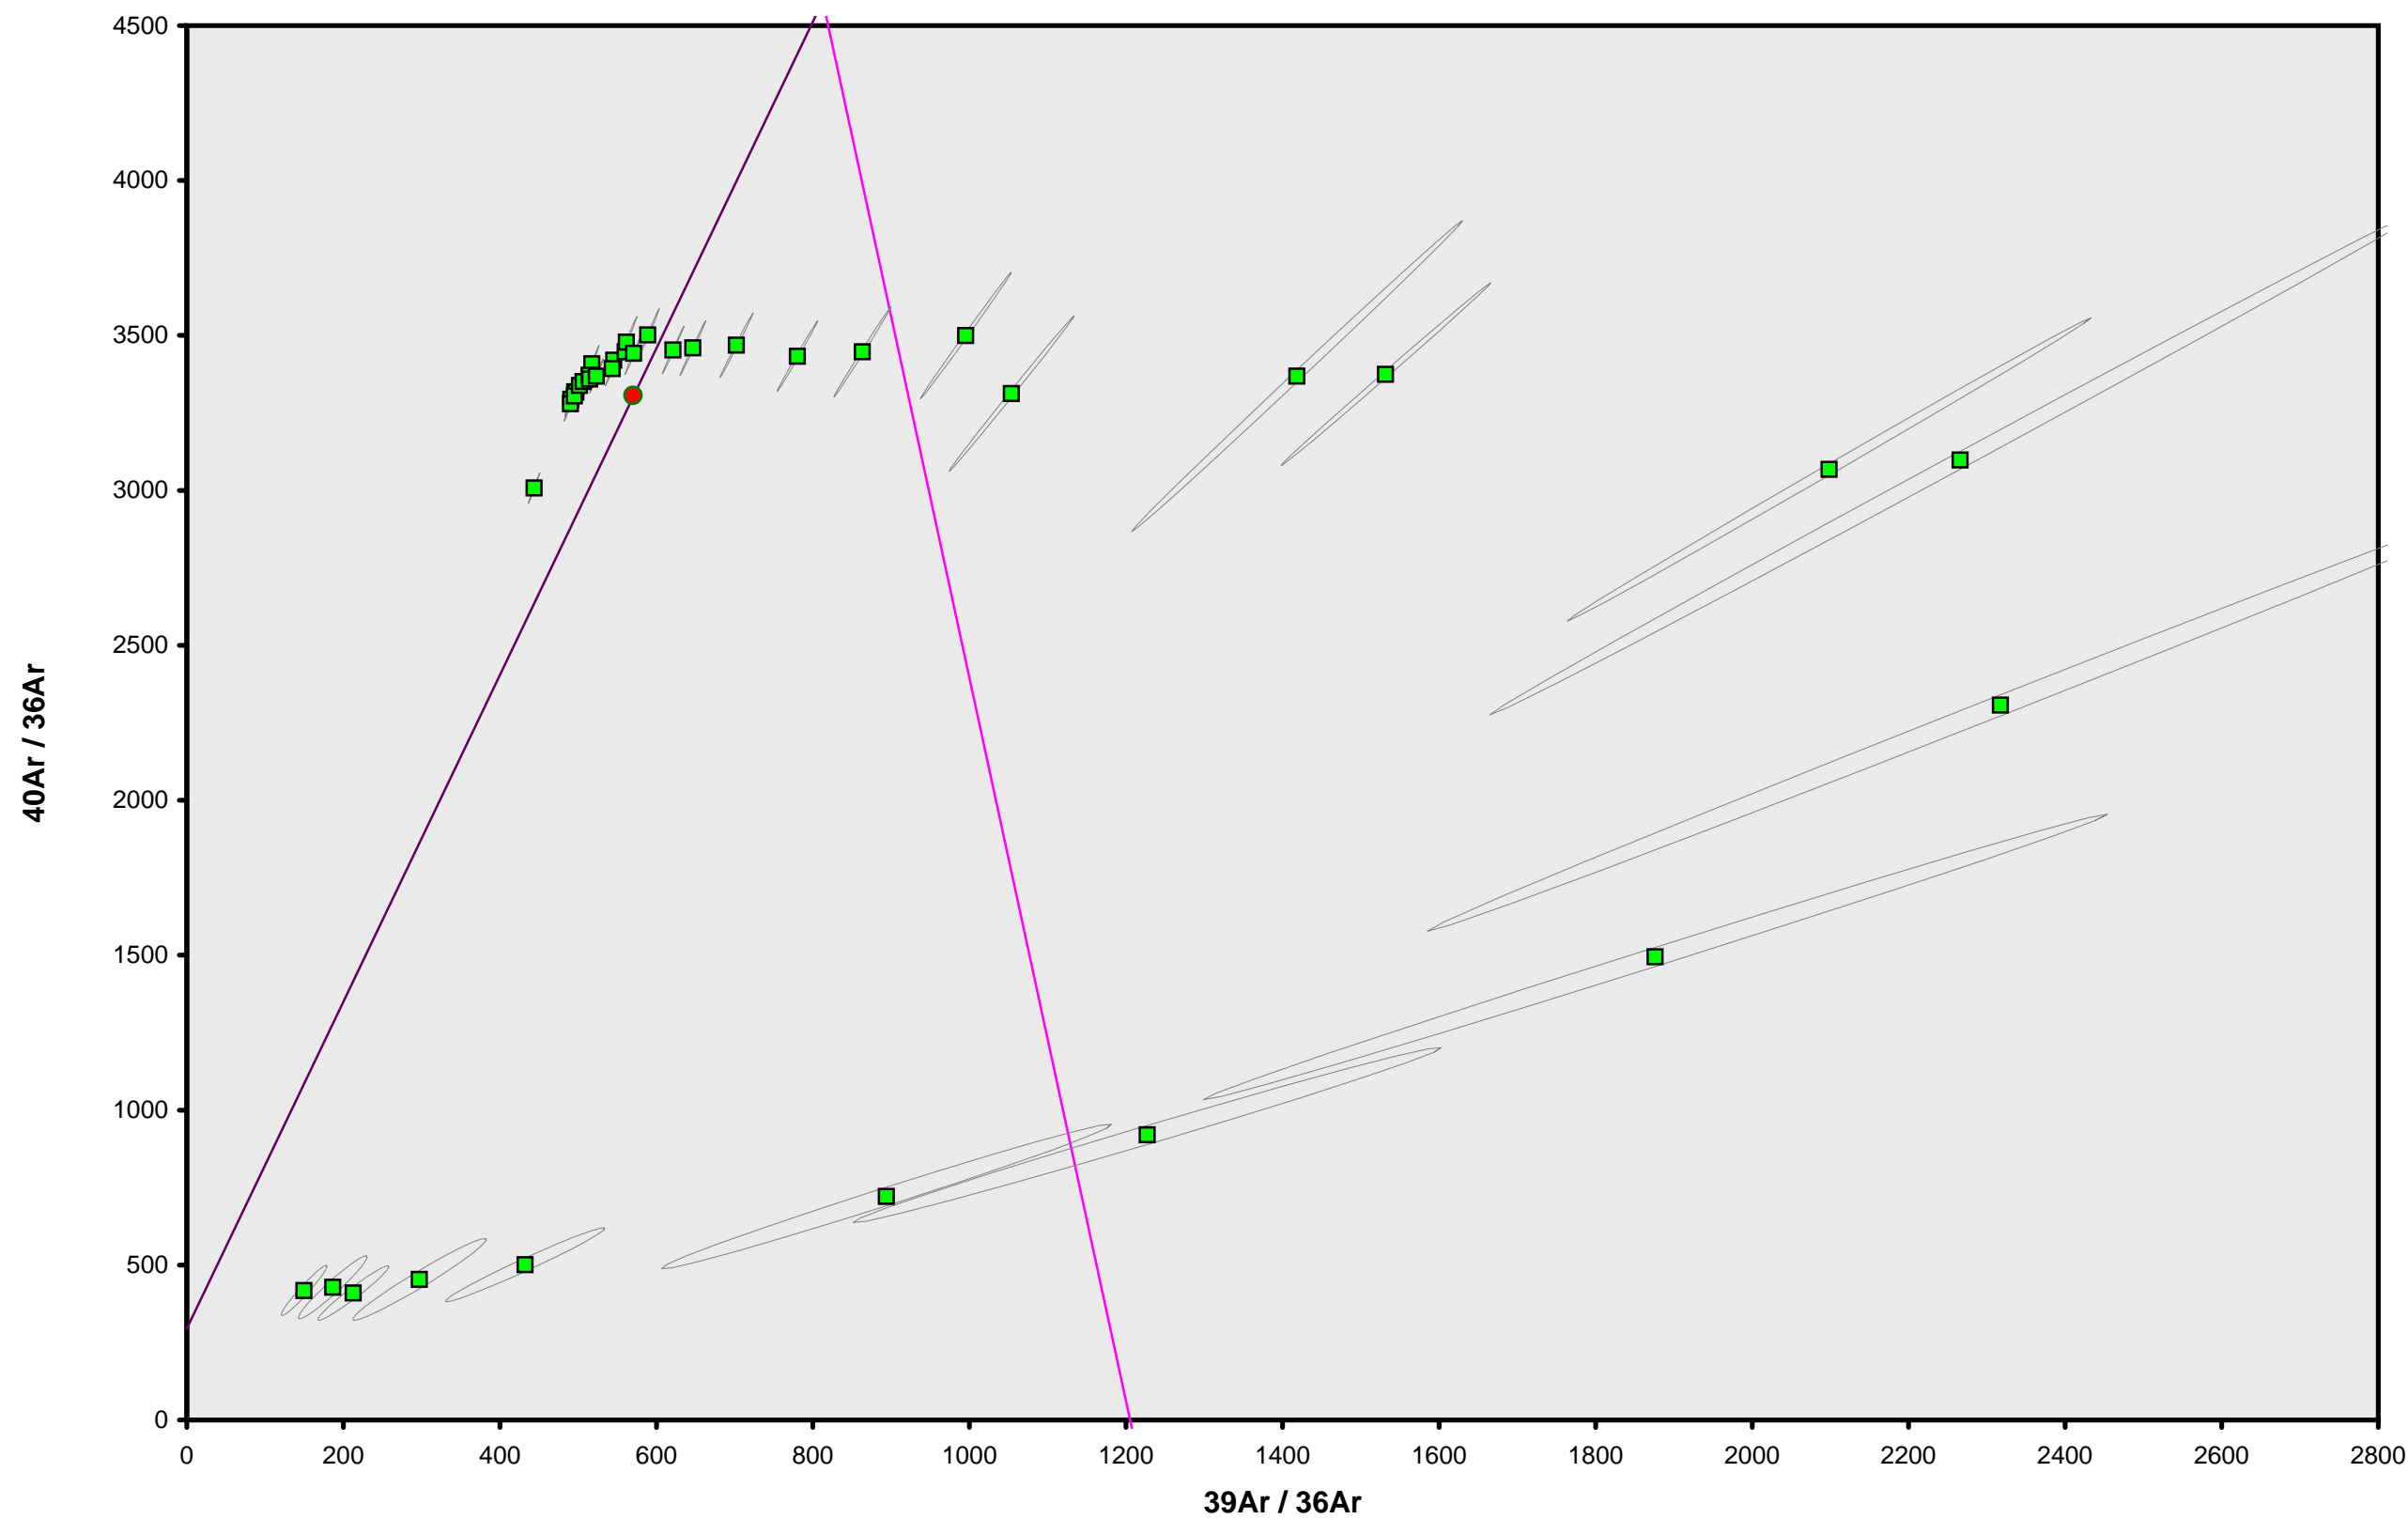

**Ar-Ages in Ma**

**WEIGHTED PLATEAU**  
 $16.42 \pm 1.25$

**TOTAL FUSION**  
 $16.44 \pm 0.08$

**NORMAL ISOCHRON**  
 $-65.87 \pm 25.96$  (NEG)

**INVERSE ISOCHRON**  
 $0.09 \pm 0.03$

**MSWD (PROBABILITY)**  
> 100 (0%)

**40AR/36AR INTERCEPT**  
 $14059.4 \pm 4207.5$

**Sample Info**

Groundmass  
Kerguelen Plateau  
Anthony Koppers

IRR = 14-OSU-06 (6C15-14)  
J =  $0.00173028 \pm 0.00000443$



15D00232.AGE >>> CAPTAINS SAMPLE >>> KERGUELEN | FALLOON (14-PIL-01) PROJECT

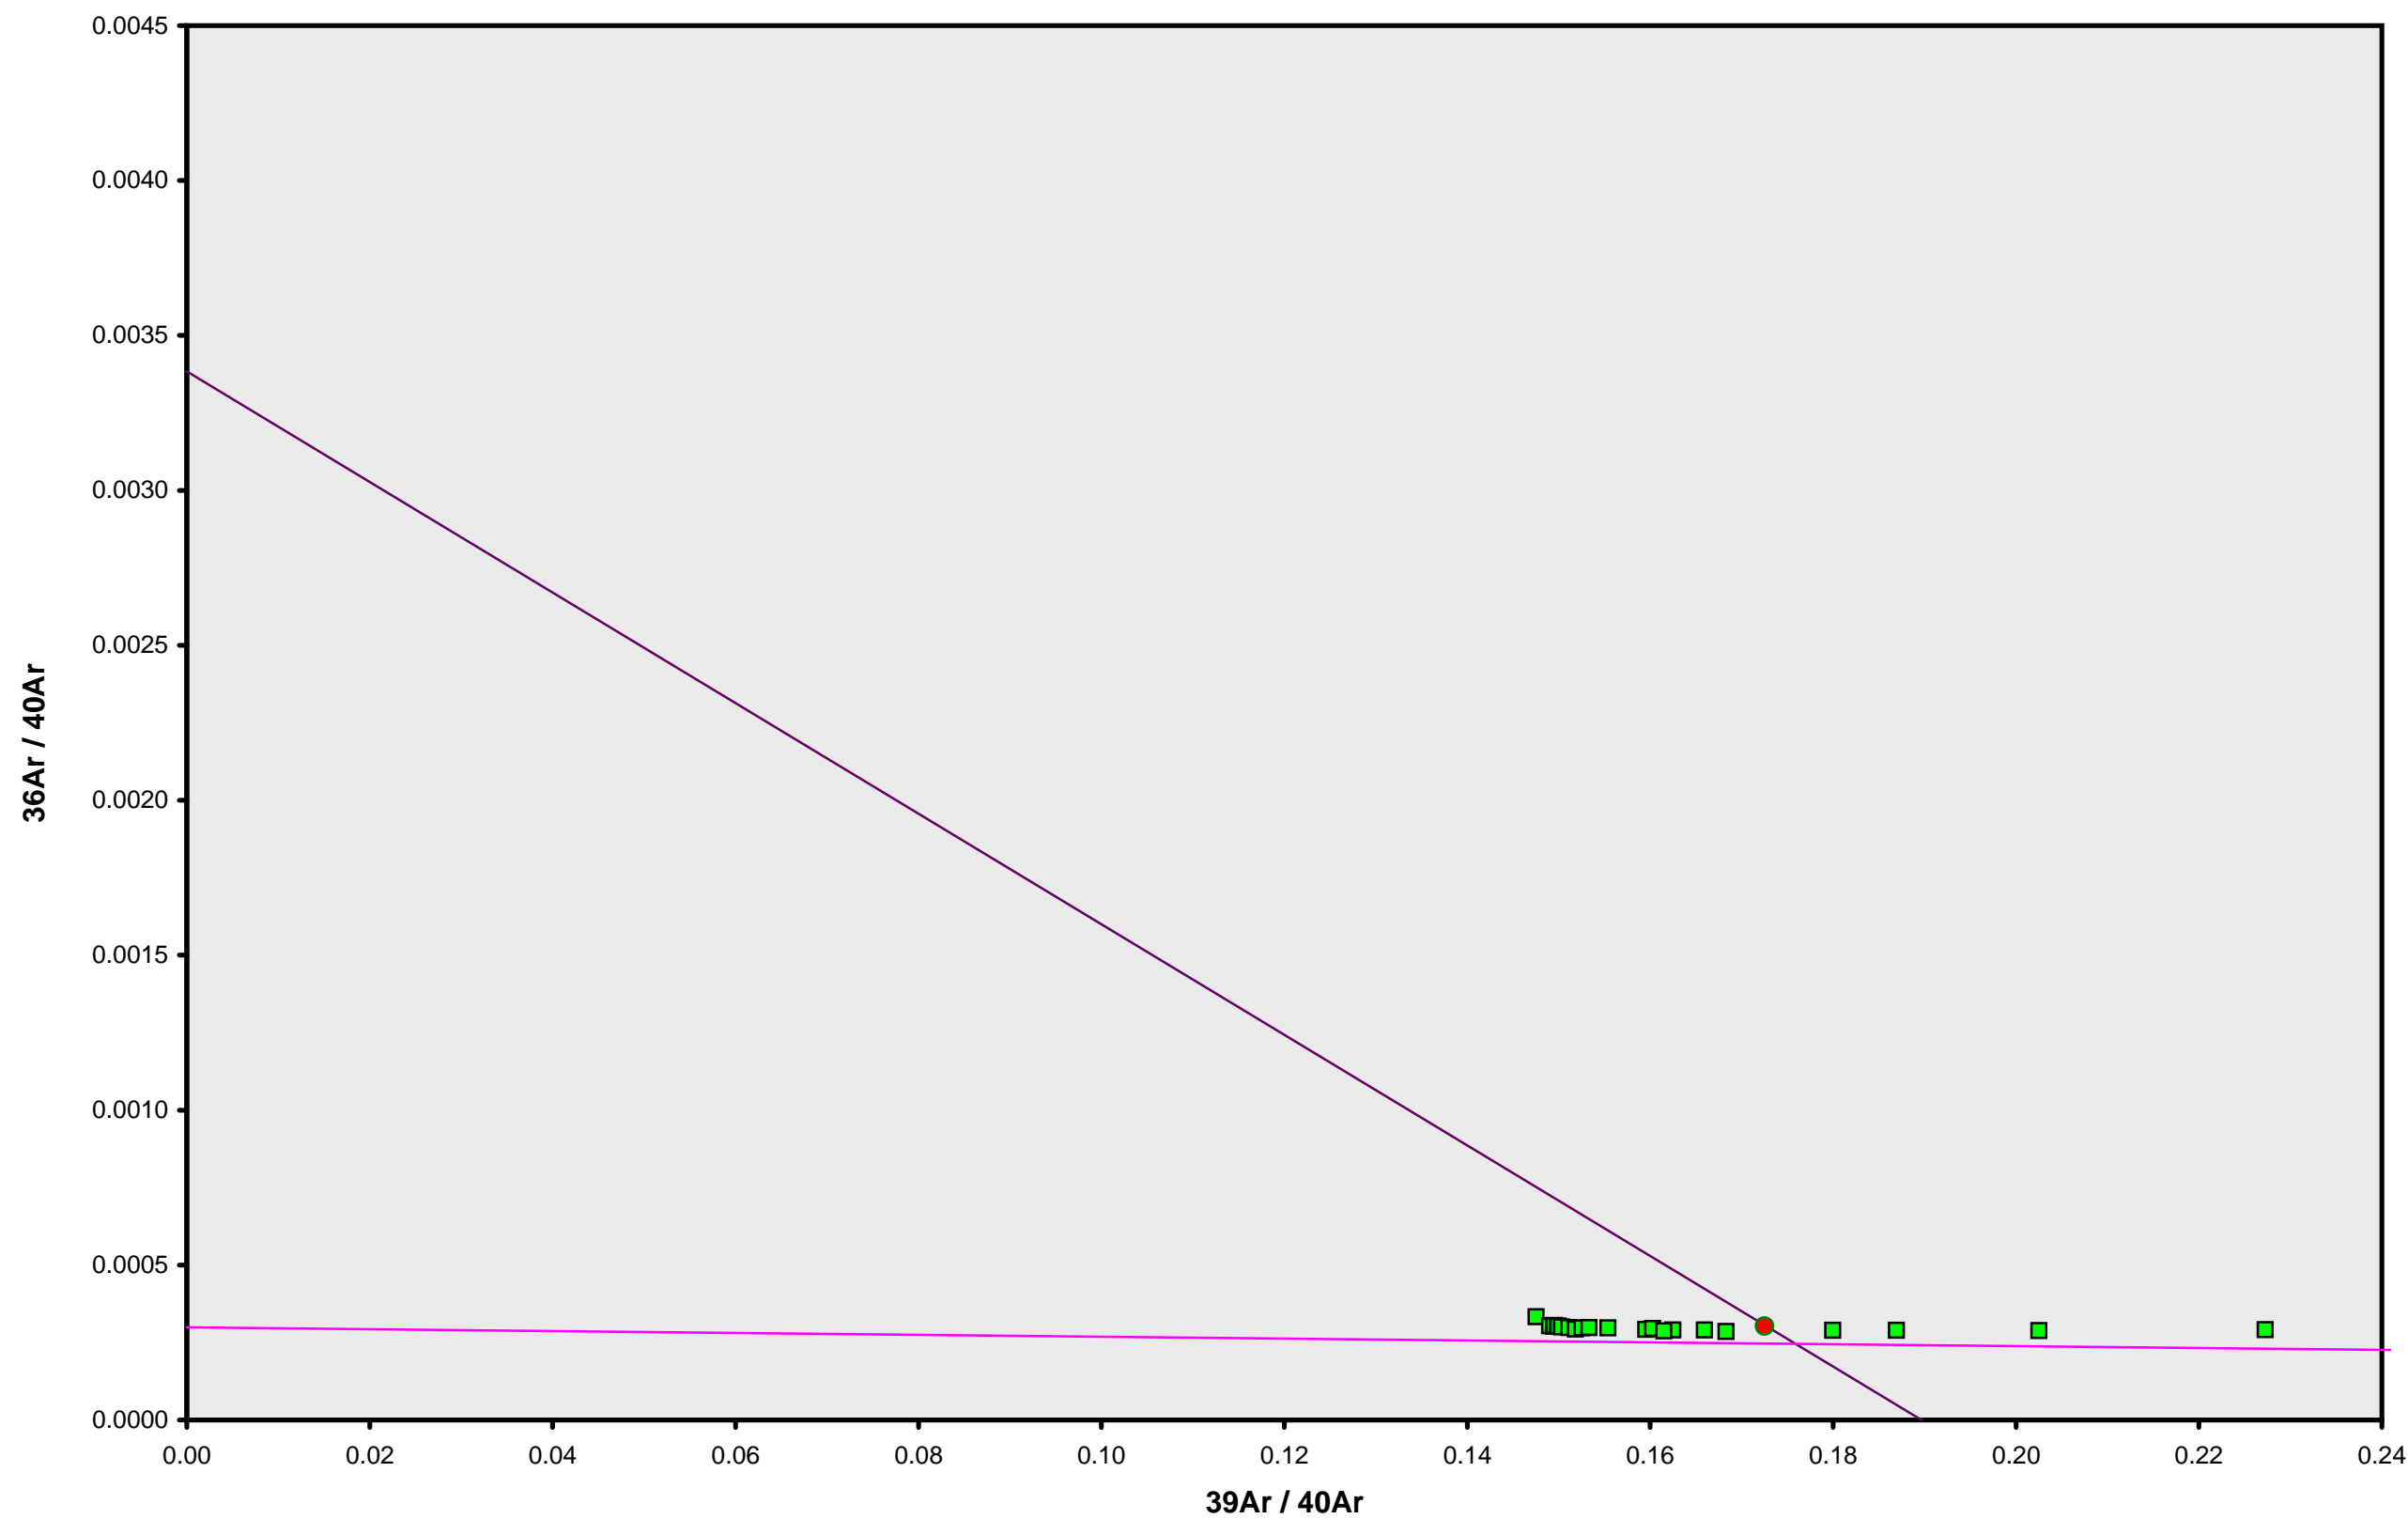

**Ar-Ages in Ma**

**WEIGHTED PLATEAU**  
16.42 ± 1.25

**TOTAL FUSION**  
16.44 ± 0.08

**NORMAL ISOCHRON**  
-65.87 ± 25.96 (NEG)

**INVERSE ISOCHRON**  
0.09 ± 0.03

**MSWD (PROBABILITY)**  
16.89 (0%)

**SPREADING FACTOR**  
3.3%

**40AR/36AR INTERCEPT**  
3344.0 ± 286.7

**Sample Info**

Groundmass  
Kerguelen Plateau  
Anthony Koppers

IRR = 14-OSU-06 (6C15-14)  
J = 0.00173028 ± 0.00000443



| Incremental Heating |        | 36Ar(a)<br>[fA] | 37Ar(ca)<br>[fA] | 38Ar(cl)<br>[fA] | 39Ar(k)<br>[fA] | 40Ar(r)<br>[fA] | Age ± 2σ<br>(Ma) | 40Ar(r)<br>(%) | 39Ar(k)<br>(%) | K/Ca ± 2σ       |
|---------------------|--------|-----------------|------------------|------------------|-----------------|-----------------|------------------|----------------|----------------|-----------------|
| 15D00181            | 1.9 %  | 0.9517120       | 3.1388           | 0.0537856        | 3.54623         | 30.35789        | 26.79 ± 2.07     | 9.74           | 3.25           | 0.4858 ± 0.0516 |
| 15D00182            | 2.0 %  | 0.3732153       | 2.4664           | 0.0638513        | 3.43962         | 25.87284        | 23.56 ± 1.26     | 19.00          | 3.15           | 0.5997 ± 0.0809 |
| 15D00184            | 2.1 %  | 0.1676683       | 2.3391           | 0.0652009        | 3.25286         | 22.69130        | 21.86 ± 1.03     | 31.41          | 2.98           | 0.5980 ± 0.0874 |
| 15D00185            | 2.2 %  | 0.0927967       | 2.4028           | 0.0924533        | 2.87086         | 18.98295        | 20.73 ± 1.08     | 40.91          | 2.63           | 0.5138 ± 0.0748 |
| 15D00186            | 2.3 %  | 0.0585860       | 2.2566           | 0.0251615        | 2.89839         | 19.32870        | 20.91 ± 1.02     | 52.75          | 2.66           | 0.5523 ± 0.0846 |
| 15D00188            | 2.4 %  | 0.0456026       | 2.4274           | 0.0144699        | 3.35028         | 20.78012        | 19.45 ± 0.83     | 60.66          | 3.07           | 0.5935 ± 0.0823 |
| 15D00189            | 2.5 %  | 0.0325224       | 1.9746           | 0.0378026        | 2.67315         | 16.83193        | 19.75 ± 1.05     | 63.65          | 2.45           | 0.5821 ± 0.0981 |
| 15D00190            | 2.6 %  | 0.0239594       | 1.8800           | 0.0236481        | 2.63778         | 16.18340        | 19.24 ± 1.02     | 69.56          | 2.42           | 0.6033 ± 0.1074 |
| 15D00192            | 2.7 %  | 0.0201067       | 2.5006           | 0.0384755        | 3.35918         | 20.67622        | 19.30 ± 0.81     | 77.67          | 3.08           | 0.5776 ± 0.0766 |
| 15D00193            | 2.8 %  | 0.0155606       | 1.8059           | 0.0032652        | 2.56136         | 15.87063        | 19.43 ± 1.05     | 77.53          | 2.35           | 0.6099 ± 0.1147 |
| 15D00194            | 2.9 %  | ✓ 0.0147324     | 2.0294           | 0.0443775        | 2.81618         | 16.54452        | 18.43 ± 0.94     | 79.16          | 2.58           | 0.5967 ± 0.1003 |
| 15D00196            | 3.0 %  | ✓ 0.0134036     | 1.9889           | 0.0000779        | 3.06154         | 18.43252        | 18.89 ± 0.89     | 82.30          | 2.81           | 0.6619 ± 0.1151 |
| 15D00197            | 3.2 %  | ✓ 0.0117256     | 2.0255           | 0.0708454        | 2.78107         | 15.56822        | 17.57 ± 0.91     | 81.78          | 2.55           | 0.5904 ± 0.0978 |
| 15D00198            | 3.4 %  | ✓ 0.0116713     | 2.3414           | 0.0000000        | 3.19439         | 18.01243        | 17.69 ± 0.82     | 83.92          | 2.93           | 0.5866 ± 0.0842 |
| 15D00200            | 3.6 %  | ✓ 0.0113737     | 2.3924           | 0.0110270        | 3.45898         | 19.72243        | 17.89 ± 0.75     | 85.43          | 3.17           | 0.6217 ± 0.0912 |
| 15D00201            | 3.8 %  | ✓ 0.0103375     | 2.5006           | 0.0454184        | 3.12834         | 17.23444        | 17.29 ± 0.83     | 84.93          | 2.87           | 0.5379 ± 0.0737 |
| 15D00202            | 4.0 %  | ✓ 0.0101866     | 2.5683           | 0.0126998        | 3.29977         | 18.82214        | 17.90 ± 0.77     | 86.20          | 3.02           | 0.5525 ± 0.0750 |
| 15D00204            | 4.3 %  | ✓ 0.0115843     | 3.0681           | 0.0894970        | 4.04705         | 23.76594        | 18.42 ± 0.65     | 87.40          | 3.71           | 0.5672 ± 0.0621 |
| 15D00205            | 4.6 %  | ✓ 0.0087941     | 2.8182           | 0.0524126        | 3.72286         | 21.54347        | 18.16 ± 0.69     | 89.22          | 3.41           | 0.5680 ± 0.0667 |
| 15D00206            | 4.9 %  | ✓ 0.0098284     | 2.7873           | 0.0565910        | 3.60083         | 21.25571        | 18.52 ± 0.72     | 87.97          | 3.30           | 0.5555 ± 0.0685 |
| 15D00208            | 5.2 %  | ✓ 0.0102386     | 3.3372           | 0.1247526        | 4.16542         | 23.71778        | 17.87 ± 0.63     | 88.67          | 3.82           | 0.5367 ± 0.0521 |
| 15D00209            | 5.5 %  | ✓ 0.0081227     | 2.6965           | 0.0472384        | 3.44221         | 19.91676        | 18.15 ± 0.75     | 89.23          | 3.16           | 0.5489 ± 0.0687 |
| 15D00210            | 5.8 %  | ✓ 0.0098002     | 2.8271           | 0.0450731        | 3.40152         | 19.59324        | 18.07 ± 0.77     | 87.11          | 3.12           | 0.5174 ± 0.0615 |
| 15D00212            | 6.1 %  | ✓ 0.0074703     | 2.7534           | 0.0439482        | 3.42007         | 20.08611        | 18.42 ± 0.76     | 90.08          | 3.13           | 0.5341 ± 0.0654 |
| 15D00213            | 6.5 %  | ✓ 0.0079569     | 2.8938           | 0.1083482        | 3.14410         | 18.32500        | 18.29 ± 0.83     | 88.61          | 2.88           | 0.4672 ± 0.0562 |
| 15D00214            | 7.0 %  | ✓ 0.0087564     | 3.6158           | 0.0593239        | 3.28034         | 19.01697        | 18.19 ± 0.78     | 88.01          | 3.01           | 0.3901 ± 0.0375 |
| 15D00216            | 7.6 %  | ✓ 0.0118886     | 5.1353           | 0.0834672        | 3.20897         | 18.38838        | 17.98 ± 0.82     | 83.95          | 2.94           | 0.2687 ± 0.0185 |
| 15D00217            | 8.4 %  | ✓ 0.0095433     | 9.4589           | 0.0756690        | 3.22642         | 18.04747        | 17.55 ± 0.78     | 86.47          | 2.96           | 0.1467 ± 0.0062 |
| 15D00218            | 9.4 %  | 0.0101873       | 24.8187          | 0.1203284        | 3.15592         | 16.66144        | 16.57 ± 0.80     | 84.68          | 2.89           | 0.0547 ± 0.0015 |
| 15D00220            | 10.5 % | 0.0099327       | 50.7460          | 0.0564790        | 2.81220         | 13.58830        | 15.17 ± 0.90     | 82.22          | 2.58           | 0.0238 ± 0.0006 |
| 15D00221            | 11.7 % | 0.0128099       | 108.1217         | 0.0614637        | 2.67319         | 9.56247         | 11.24 ± 0.94     | 71.63          | 2.45           | 0.0106 ± 0.0003 |
| 15D00222            | 13.1 % | 0.0139003       | 224.0217         | 0.1059599        | 2.55211         | 7.80068         | 9.61 ± 1.03      | 65.49          | 2.34           | 0.0049 ± 0.0001 |
| 15D00224            | 14.7 % | 0.0161315       | 328.7379         | 0.0307772        | 2.00371         | 5.34007         | 8.38 ± 1.35      | 52.83          | 1.84           | 0.0026 ± 0.0001 |
| 15D00225            | 16.5 % | 0.0220345       | 504.7757         | 0.0466438        | 1.76282         | 5.35185         | 9.55 ± 1.78      | 45.11          | 1.62           | 0.0015 ± 0.0001 |
| 15D00226            | 18.3 % | 0.0146491       | 501.9579         | 0.0431198        | 1.06267         | 4.37832         | 12.94 ± 2.95     | 50.28          | 0.97           | 0.0009 ± 0.0001 |
| 15D00228            | 20.2 % | 0.0190710       | 519.7331         | 0.0766507        | 0.82147         | 2.86140         | 10.95 ± 3.75     | 33.67          | 0.75           | 0.0007 ± 0.0001 |
| 15D00229            | 22.2 % | 0.0163536       | 509.5321         | 0.0707920        | 0.70958         | 2.65703         | 11.77 ± 4.36     | 35.47          | 0.65           | 0.0006 ± 0.0001 |
| 15D00231            | 24.5 % | 0.0189526       | 463.5103         | 0.0326437        | 0.54965         | 1.33469         | 7.64 ± 5.51      | 19.24          | 0.50           | 0.0005 ± 0.0001 |

Σ 2.1231671 3316.3857 2.0337393 109.09310 625.10578

| Information on Analysis                                                                                                                                                                                                                                                           | Results          | 40(r)/39(k) ± 2σ          | Age ± 2σ<br>(Ma)                                                              | MSWD                          | 39Ar(k)<br>(%,n)                                          | K/Ca ± 2σ       |
|-----------------------------------------------------------------------------------------------------------------------------------------------------------------------------------------------------------------------------------------------------------------------------------|------------------|---------------------------|-------------------------------------------------------------------------------|-------------------------------|-----------------------------------------------------------|-----------------|
| Sample = 1180010-2<br>Material = Groundmass<br>Location = Kerguelen Plateau<br>Analyst = Anthony Koppers<br>Project = KERGUELEN   FALLOON (14-<br>Mass Discrimination Law = LIN<br>Irradiation = 14-OSU-06 (6C14-14)<br>J = 0.00174370 ± 0.00000450<br>FCT-NM = 28.201 ± 0.023 Ma | Age Plateau      | 5.76063 ± 0.05817 ± 1.01% | 18.07 ± 0.20 ± 1.13%<br>Full External Error ± 0.46<br>Analytical Error ± 0.18 | 0.96<br>50%<br>1.69<br>1.0000 | 55.37<br>18<br>2σ Confidence Limit<br>Error Magnification | 0.1998 ± 0.0589 |
|                                                                                                                                                                                                                                                                                   | Total Fusion Age | 5.73002 ± 0.05459 ± 0.95% | 17.98 ± 0.19 ± 1.08%<br>Full External Error ± 0.45<br>Analytical Error ± 0.17 |                               | 38                                                        | 0.0141 ± 0.0001 |



| Normal Isochron |        | 39(k)/36(a) ± 2σ |                 | 40(a+r)/36(a) ± 2σ | r.i.   |
|-----------------|--------|------------------|-----------------|--------------------|--------|
| 15D00181        | 1.9 %  |                  | 3.73 ± 0.08     | 327.40 ± 2.65      | 0.3709 |
| 15D00182        | 2.0 %  |                  | 9.22 ± 0.21     | 364.82 ± 4.22      | 0.4808 |
| 15D00184        | 2.1 %  |                  | 19.40 ± 0.55    | 430.83 ± 8.28      | 0.6595 |
| 15D00185        | 2.2 %  |                  | 30.94 ± 1.23    | 500.07 ± 15.44     | 0.7588 |
| 15D00186        | 2.3 %  |                  | 49.47 ± 2.58    | 625.42 ± 28.91     | 0.8741 |
| 15D00188        | 2.4 %  |                  | 73.47 ± 4.34    | 751.18 ± 41.75     | 0.9293 |
| 15D00189        | 2.5 %  |                  | 82.19 ± 6.77    | 813.05 ± 63.56     | 0.9396 |
| 15D00190        | 2.6 %  |                  | 110.09 ± 11.46  | 970.95 ± 97.99     | 0.9618 |
| 15D00192        | 2.7 %  |                  | 167.07 ± 20.49  | 1323.82 ± 160.17   | 0.9822 |
| 15D00193        | 2.8 %  |                  | 164.61 ± 25.71  | 1315.42 ± 202.52   | 0.9816 |
| 15D00194        | 2.9 %  | ✓                | 191.16 ± 31.14  | 1418.50 ± 228.36   | 0.9847 |
| 15D00196        | 3.0 %  | ✓                | 228.41 ± 41.88  | 1670.69 ± 303.89   | 0.9895 |
| 15D00197        | 3.2 %  | ✓                | 237.18 ± 46.78  | 1623.21 ± 317.92   | 0.9899 |
| 15D00198        | 3.4 %  | ✓                | 273.70 ± 56.43  | 1838.81 ± 377.43   | 0.9933 |
| 15D00200        | 3.6 %  | ✓                | 304.12 ± 63.42  | 2029.53 ± 421.57   | 0.9943 |
| 15D00201        | 3.8 %  | ✓                | 302.62 ± 68.06  | 1962.67 ± 439.29   | 0.9932 |
| 15D00202        | 4.0 %  | ✓                | 323.93 ± 74.30  | 2143.23 ± 489.95   | 0.9950 |
| 15D00204        | 4.3 %  | ✓                | 349.36 ± 71.81  | 2347.07 ± 480.91   | 0.9955 |
| 15D00205        | 4.6 %  | ✓                | 423.34 ± 111.45 | 2745.26 ± 721.25   | 0.9969 |
| 15D00206        | 4.9 %  | ✓                | 366.37 ± 85.69  | 2458.18 ± 573.08   | 0.9955 |
| 15D00208        | 5.2 %  | ✓                | 406.84 ± 94.05  | 2612.01 ± 602.41   | 0.9966 |
| 15D00209        | 5.5 %  | ✓                | 423.78 ± 121.40 | 2747.48 ± 785.41   | 0.9968 |
| 15D00210        | 5.8 %  | ✓                | 347.09 ± 84.58  | 2294.77 ± 557.63   | 0.9958 |
| 15D00212        | 6.1 %  | ✓                | 457.82 ± 144.42 | 2984.28 ± 939.71   | 0.9974 |
| 15D00213        | 6.5 %  | ✓                | 395.14 ± 115.80 | 2598.55 ± 759.41   | 0.9961 |
| 15D00214        | 7.0 %  | ✓                | 374.62 ± 98.89  | 2467.28 ± 649.53   | 0.9959 |
| 15D00216        | 7.6 %  | ✓                | 269.92 ± 53.97  | 1842.23 ± 366.32   | 0.9923 |
| 15D00217        | 8.4 %  | ✓                | 338.08 ± 80.09  | 2186.62 ± 516.16   | 0.9947 |
| 15D00218        | 9.4 %  |                  | 309.79 ± 70.23  | 1931.01 ± 435.83   | 0.9935 |
| 15D00220        | 10.5 % |                  | 283.12 ± 68.78  | 1663.53 ± 402.49   | 0.9933 |
| 15D00221        | 11.7 % |                  | 208.68 ± 40.41  | 1041.99 ± 200.28   | 0.9863 |
| 15D00222        | 13.1 % |                  | 183.60 ± 35.20  | 856.69 ± 163.08    | 0.9846 |
| 15D00224        | 14.7 % |                  | 124.21 ± 21.70  | 626.53 ± 107.75    | 0.9708 |
| 15D00225        | 16.5 % |                  | 80.00 ± 12.20   | 538.38 ± 79.74     | 0.9583 |
| 15D00226        | 18.3 % |                  | 72.54 ± 16.41   | 594.38 ± 128.25    | 0.9423 |
| 15D00228        | 20.2 % |                  | 43.07 ± 8.06    | 445.54 ± 74.05     | 0.8694 |
| 15D00229        | 22.2 % |                  | 43.39 ± 9.41    | 457.97 ± 88.86     | 0.8774 |
| 15D00231        | 24.5 % |                  | 29.00 ± 6.13    | 365.92 ± 61.45     | 0.7703 |

| Results                           | 40(a)/36(a) ± 2σ                                                    | 40(r)/39(k) ± 2σ          | Age ± 2σ (Ma)                                          | MSWD                                     |
|-----------------------------------|---------------------------------------------------------------------|---------------------------|--------------------------------------------------------|------------------------------------------|
| Normal Isochron<br>No Convergence | 346.64 ± 93.17 ± 26.88%                                             | 5.57317 ± 0.29580 ± 5.31% | 17.49 ± 0.93 ± 5.31%                                   | 0.94<br>52%                              |
|                                   |                                                                     |                           | Full External Error ± 1.01<br>Analytical Error ± 0.92  |                                          |
| Statistics                        | 2σ Confidence Limit<br>Error Magnification<br>Number of Data Points | 1.71<br>1.0000<br>18      | Convergence<br>Number of Iterations<br>Calculated Line | 0.000742501568<br>100<br>Weighted York-2 |



| Inverse Isochron |        | 39(k)/40(a+r) ± 2σ |                       | 36(a)/40(a+r) ± 2σ      | r.i.   |
|------------------|--------|--------------------|-----------------------|-------------------------|--------|
| 15D00181         | 1.9 %  |                    | 0.0113811 ± 0.0002287 | 0.00305438 ± 0.00002472 | 0.0033 |
| 15D00182         | 2.0 %  |                    | 0.0252620 ± 0.0005148 | 0.00274105 ± 0.00003171 | 0.0194 |
| 15D00184         | 2.1 %  |                    | 0.0450302 ± 0.0009633 | 0.00232108 ± 0.00004463 | 0.0217 |
| 15D00185         | 2.2 %  |                    | 0.0618662 ± 0.0016044 | 0.00199974 ± 0.00006173 | 0.0258 |
| 15D00186         | 2.3 %  |                    | 0.0791026 ± 0.0020026 | 0.00159893 ± 0.00007391 | 0.0274 |
| 15D00188         | 2.4 %  |                    | 0.0978021 ± 0.0021360 | 0.00133124 ± 0.00007399 | 0.0300 |
| 15D00189         | 2.5 %  |                    | 0.1010939 ± 0.0028517 | 0.00122994 ± 0.00009615 | 0.0276 |
| 15D00190         | 2.6 %  |                    | 0.1133873 ± 0.0032314 | 0.00102992 ± 0.00010394 | 0.0271 |
| 15D00192         | 2.7 %  |                    | 0.1262006 ± 0.0029076 | 0.00075539 ± 0.00009139 | 0.0220 |
| 15D00193         | 2.8 %  |                    | 0.1251348 ± 0.0037289 | 0.00076021 ± 0.00011704 | 0.0221 |
| 15D00194         | 2.9 %  | ✓                  | 0.1347587 ± 0.0038284 | 0.00070497 ± 0.00011349 | 0.0209 |
| 15D00196         | 3.0 %  | ✓                  | 0.1367168 ± 0.0036187 | 0.00059855 ± 0.00010887 | 0.0176 |
| 15D00197         | 3.2 %  | ✓                  | 0.1461174 ± 0.0040888 | 0.00061606 ± 0.00012066 | 0.0214 |
| 15D00198         | 3.4 %  | ✓                  | 0.1488441 ± 0.0035341 | 0.00054383 ± 0.00011162 | 0.0186 |
| 15D00200         | 3.6 %  | ✓                  | 0.1498474 ± 0.0033178 | 0.00049272 ± 0.00010235 | 0.0169 |
| 15D00201         | 3.8 %  | ✓                  | 0.1541876 ± 0.0040470 | 0.00050951 ± 0.00011404 | 0.0175 |
| 15D00202         | 4.0 %  | ✓                  | 0.1511417 ± 0.0034585 | 0.00046659 ± 0.00010666 | 0.0170 |
| 15D00204         | 4.3 %  | ✓                  | 0.1488482 ± 0.0029033 | 0.00042606 ± 0.00008730 | 0.0141 |
| 15D00205         | 4.6 %  | ✓                  | 0.1542060 ± 0.0031953 | 0.00036426 ± 0.00009570 | 0.0135 |
| 15D00206         | 4.9 %  | ✓                  | 0.1490409 ± 0.0033168 | 0.00040681 ± 0.00009484 | 0.0139 |
| 15D00208         | 5.2 %  | ✓                  | 0.1557558 ± 0.0029886 | 0.00038285 ± 0.00008830 | 0.0133 |
| 15D00209         | 5.5 %  | ✓                  | 0.1542416 ± 0.0035082 | 0.00036397 ± 0.00010405 | 0.0129 |
| 15D00210         | 5.8 %  | ✓                  | 0.1512512 ± 0.0033848 | 0.00043577 ± 0.00010589 | 0.0154 |
| 15D00212         | 6.1 %  | ✓                  | 0.1534102 ± 0.0035141 | 0.00033509 ± 0.00010552 | 0.0116 |
| 15D00213         | 6.5 %  | ✓                  | 0.1520632 ± 0.0039407 | 0.00038483 ± 0.00011246 | 0.0131 |
| 15D00214         | 7.0 %  | ✓                  | 0.1518362 ± 0.0036112 | 0.00040531 ± 0.00010670 | 0.0145 |
| 15D00216         | 7.6 %  | ✓                  | 0.1465186 ± 0.0036246 | 0.00054282 ± 0.00010794 | 0.0182 |
| 15D00217         | 8.4 %  | ✓                  | 0.1546144 ± 0.0037568 | 0.00045733 ± 0.00010795 | 0.0169 |
| 15D00218         | 9.4 %  |                    | 0.1604290 ± 0.0041473 | 0.00051786 ± 0.00011688 | 0.0188 |
| 15D00220         | 10.5 % |                    | 0.1701950 ± 0.0047707 | 0.00060113 ± 0.00014544 | 0.0228 |
| 15D00221         | 11.7 % |                    | 0.2002717 ± 0.0063943 | 0.00095970 ± 0.00018447 | 0.0376 |
| 15D00222         | 13.1 % |                    | 0.2143147 ± 0.0071960 | 0.00116729 ± 0.00022221 | 0.0468 |
| 15D00224         | 14.7 % |                    | 0.1982509 ± 0.0083208 | 0.00159608 ± 0.00027448 | 0.0564 |
| 15D00225         | 16.5 % |                    | 0.1485979 ± 0.0064783 | 0.00185741 ± 0.00027509 | 0.0459 |
| 15D00226         | 18.3 % |                    | 0.1220464 ± 0.0092459 | 0.00168243 ± 0.00036303 | 0.0343 |
| 15D00228         | 20.2 % |                    | 0.0966793 ± 0.0089462 | 0.00224447 ± 0.00037306 | 0.0379 |
| 15D00229         | 22.2 % |                    | 0.0947437 ± 0.0098595 | 0.00218353 ± 0.00042369 | 0.0366 |
| 15D00231         | 24.5 % |                    | 0.0792560 ± 0.0106828 | 0.00273282 ± 0.00045896 | 0.0388 |

| Results          | 40(a)/36(a) ± 2σ        |        | 40(r)/39(k) ± 2σ           | Age ± 2σ (Ma)        | MSWD |
|------------------|-------------------------|--------|----------------------------|----------------------|------|
| Inverse Isochron | 353.42 ± 97.28 ± 27.53% |        | 5.58661 ± 0.27586 ± 4.94%  | 17.53 ± 0.87 ± 4.94% | 0.91 |
|                  |                         |        | Full External Error ± 0.95 |                      | 55%  |
|                  |                         |        | Analytical Error ± 0.86    |                      |      |
| Statistics       | 2σ Confidence Limit     | 1.71   | Convergence                | 0.0003049146         |      |
|                  | Error Magnification     | 1.0000 | Number of Iterations       | 5                    |      |
|                  | Number of Data Points   | 18     | Calculated Line            | Weighted York-2      |      |
|                  | Spreading Factor        | 11.7%  |                            |                      |      |



| OSU Argon Geochronology Lab |        |             |        |           |       |           |         |           |       |           |       |                   |               |             |             |                 |
|-----------------------------|--------|-------------|--------|-----------|-------|-----------|---------|-----------|-------|-----------|-------|-------------------|---------------|-------------|-------------|-----------------|
| Relative Abundances         |        | 36Ar [fA]   | %1σ    | 37Ar [fA] | %1σ   | 38Ar [fA] | %1σ     | 39Ar [fA] | %1σ   | 40Ar [fA] | %1σ   | 40(r)/39(k) ± 2σ  | Age ± 2σ (Ma) | 40Ar(r) (%) | 39Ar(k) (%) | K/Ca ± 2σ       |
| 15D00181                    | 1.9 %  | 0.9525464   | 0.403  | 3.1388    | 5.219 | 0.2720603 | 15.445  | 3.54834   | 1.003 | 311.5924  | 0.037 | 8.56062 ± 0.66498 | 26.79 ± 2.07  | 9.74        | 3.25        | 0.4858 ± 0.0516 |
| 15D00182                    | 2.0 %  | 0.3738733   | 0.567  | 2.4664    | 6.669 | 0.1727824 | 23.386  | 3.44128   | 1.013 | 136.1614  | 0.107 | 7.52200 ± 0.40406 | 23.56 ± 1.26  | 19.00       | 3.15        | 0.5997 ± 0.0809 |
| 15D00184                    | 2.1 %  | 0.1682928   | 0.946  | 2.3391    | 7.231 | 0.1335882 | 31.696  | 3.25443   | 1.059 | 72.2406   | 0.149 | 6.97580 ± 0.33159 | 21.86 ± 1.03  | 31.41       | 2.98        | 0.5980 ± 0.0874 |
| 15D00185                    | 2.2 %  | 0.0934410   | 1.515  | 2.4028    | 7.170 | 0.1425008 | 29.024  | 2.87248   | 1.276 | 46.4073   | 0.227 | 6.61228 ± 0.34490 | 20.73 ± 1.08  | 40.91       | 2.63        | 0.5138 ± 0.0748 |
| 15D00186                    | 2.3 %  | 0.0591845   | 2.269  | 2.2566    | 7.557 | 0.0691262 | 59.807  | 2.89991   | 1.233 | 36.6438   | 0.283 | 6.66878 ± 0.32754 | 20.91 ± 1.02  | 52.75       | 2.66        | 0.5523 ± 0.0846 |
| 15D00188                    | 2.4 %  | 0.0462450   | 2.723  | 2.4274    | 6.854 | 0.0611530 | 65.248  | 3.35191   | 1.049 | 34.2591   | 0.302 | 6.20251 ± 0.26486 | 19.45 ± 0.83  | 60.66       | 3.07        | 0.5935 ± 0.0823 |
| 15D00189                    | 2.5 %  | 0.0330477   | 3.825  | 1.9746    | 8.313 | 0.0743290 | 57.196  | 2.67448   | 1.355 | 26.4450   | 0.390 | 6.29666 ± 0.33660 | 19.75 ± 1.05  | 63.65       | 2.45        | 0.5821 ± 0.0981 |
| 15D00190                    | 2.6 %  | 0.0244583   | 4.921  | 1.8800    | 8.800 | 0.0581701 | 74.157  | 2.63904   | 1.354 | 23.2661   | 0.442 | 6.13525 ± 0.32637 | 19.24 ± 1.02  | 69.56       | 2.42        | 0.6033 ± 0.1074 |
| 15D00192                    | 2.7 %  | 0.0207710   | 5.840  | 2.5006    | 6.542 | 0.0804957 | 50.771  | 3.36086   | 1.083 | 26.6212   | 0.392 | 6.15514 ± 0.25931 | 19.30 ± 0.81  | 77.67       | 3.08        | 0.5776 ± 0.0766 |
| 15D00193                    | 2.8 %  | 0.0160377   | 7.448  | 1.8059    | 9.299 | 0.0353468 | 118.787 | 2.56257   | 1.402 | 20.4714   | 0.503 | 6.19618 ± 0.33577 | 19.43 ± 1.05  | 77.53       | 2.35        | 0.6099 ± 0.1147 |
| 15D00194                    | 2.9 %  | ✓ 0.0152730 | 7.745  | 2.0294    | 8.297 | 0.0792073 | 52.134  | 2.81755   | 1.333 | 20.9008   | 0.489 | 5.87481 ± 0.30252 | 18.43 ± 0.94  | 79.16       | 2.58        | 0.5967 ± 0.1003 |
| 15D00196                    | 3.0 %  | ✓ 0.0139287 | 8.735  | 1.9889    | 8.604 | 0.0374510 | 110.693 | 3.06288   | 1.240 | 22.3964   | 0.460 | 6.02067 ± 0.28651 | 18.89 ± 0.89  | 82.30       | 2.81        | 0.6619 ± 0.1151 |
| 15D00197                    | 3.2 %  | ✓ 0.0122680 | 9.339  | 2.0255    | 8.185 | 0.1047137 | 42.198  | 2.78244   | 1.289 | 19.0360   | 0.542 | 5.59792 ± 0.29278 | 17.57 ± 0.91  | 81.78       | 2.55        | 0.5904 ± 0.0978 |
| 15D00198                    | 3.4 %  | ✓ 0.0122894 | 9.730  | 2.3414    | 7.097 | 0.0260382 | 159.660 | 3.19596   | 1.087 | 21.4645   | 0.476 | 5.63877 ± 0.26104 | 17.69 ± 0.82  | 83.92       | 2.93        | 0.5866 ± 0.0842 |
| 15D00200                    | 3.6 %  | ✓ 0.0120065 | 9.822  | 2.3924    | 7.262 | 0.0525492 | 82.074  | 3.46059   | 1.015 | 23.0869   | 0.441 | 5.70180 ± 0.23987 | 17.89 ± 0.75  | 85.43       | 3.17        | 0.6217 ± 0.0912 |
| 15D00201                    | 3.8 %  | ✓ 0.0110026 | 10.496 | 2.5006    | 6.745 | 0.0829857 | 51.104  | 3.13002   | 1.210 | 20.2923   | 0.507 | 5.50913 ± 0.26416 | 17.29 ± 0.83  | 84.93       | 2.87        | 0.5379 ± 0.0737 |
| 15D00202                    | 4.0 %  | ✓ 0.0108660 | 10.698 | 2.5683    | 6.711 | 0.0521908 | 77.310  | 3.30150   | 1.042 | 21.8356   | 0.472 | 5.70408 ± 0.24790 | 17.90 ± 0.77  | 86.20       | 3.02        | 0.5525 ± 0.0750 |
| 15D00204                    | 4.3 %  | ✓ 0.0124039 | 9.555  | 3.0681    | 5.401 | 0.1377602 | 29.754  | 4.04911   | 0.899 | 27.1932   | 0.376 | 5.87242 ± 0.20909 | 18.42 ± 0.65  | 87.40       | 3.71        | 0.5672 ± 0.0621 |
| 15D00205                    | 4.6 %  | ✓ 0.0095438 | 12.089 | 2.8182    | 5.799 | 0.0964616 | 42.291  | 3.72476   | 0.943 | 24.1459   | 0.429 | 5.78680 ± 0.22047 | 18.16 ± 0.69  | 89.22       | 3.41        | 0.5680 ± 0.0667 |
| 15D00206                    | 4.9 %  | ✓ 0.0105704 | 10.823 | 2.7873    | 6.080 | 0.0994441 | 40.417  | 3.60270   | 1.028 | 24.1636   | 0.425 | 5.90300 ± 0.23087 | 18.52 ± 0.72  | 87.97       | 3.30        | 0.5555 ± 0.0685 |
| 15D00208                    | 5.2 %  | ✓ 0.0111331 | 10.592 | 3.3372    | 4.773 | 0.1741151 | 23.385  | 4.16767   | 0.879 | 26.7475   | 0.384 | 5.69397 ± 0.20121 | 17.87 ± 0.63  | 88.67       | 3.82        | 0.5367 ± 0.0521 |
| 15D00209                    | 5.5 %  | ✓ 0.0088397 | 13.118 | 2.6965    | 6.167 | 0.0879664 | 46.843  | 3.44403   | 1.040 | 22.3205   | 0.459 | 5.78603 ± 0.24028 | 18.15 ± 0.75  | 89.23       | 3.16        | 0.5489 ± 0.0687 |
| 15D00210                    | 5.8 %  | ✓ 0.0105514 | 11.269 | 2.8271    | 5.857 | 0.0856533 | 46.679  | 3.40342   | 1.020 | 22.4926   | 0.458 | 5.76014 ± 0.24544 | 18.07 ± 0.77  | 87.11       | 3.12        | 0.5174 ± 0.0615 |
| 15D00212                    | 6.1 %  | ✓ 0.0082020 | 14.324 | 2.7534    | 6.036 | 0.0843030 | 48.647  | 3.42192   | 1.049 | 22.2971   | 0.458 | 5.87302 ± 0.24503 | 18.42 ± 0.76  | 90.08       | 3.13        | 0.5341 ± 0.0654 |
| 15D00213                    | 6.5 %  | ✓ 0.0087326 | 13.296 | 2.8938    | 5.892 | 0.1456554 | 28.779  | 3.14605   | 1.196 | 20.6794   | 0.498 | 5.82838 ± 0.26728 | 18.29 ± 0.83  | 88.61       | 2.88        | 0.4672 ± 0.0562 |
| 15D00214                    | 7.0 %  | ✓ 0.0097174 | 11.844 | 3.6158    | 4.687 | 0.0983410 | 42.004  | 3.28278   | 1.089 | 21.6078   | 0.477 | 5.79725 ± 0.25092 | 18.19 ± 0.78  | 88.01       | 3.01        | 0.3901 ± 0.0375 |
| 15D00216                    | 7.6 %  | ✓ 0.0132534 | 8.902  | 5.1353    | 3.246 | 0.1222786 | 34.093  | 3.21243   | 1.142 | 21.9047   | 0.473 | 5.73030 ± 0.26193 | 17.98 ± 0.82  | 83.95       | 2.94        | 0.2687 ± 0.0185 |
| 15D00217                    | 8.4 %  | ✓ 0.0120487 | 9.333  | 9.4589    | 1.799 | 0.1143007 | 36.006  | 3.23278   | 1.108 | 20.8708   | 0.493 | 5.59366 ± 0.24898 | 17.55 ± 0.78  | 86.47       | 2.96        | 0.1467 ± 0.0062 |
| 15D00218                    | 9.4 %  | 0.0167525   | 6.849  | 24.8187   | 0.722 | 0.1584918 | 25.710  | 3.17263   | 1.176 | 19.6750   | 0.523 | 5.27942 ± 0.25706 | 16.57 ± 0.80  | 84.68       | 2.89        | 0.0547 ± 0.0015 |
| 15D00220                    | 10.5 % | 0.0233358   | 5.136  | 50.7460   | 0.444 | 0.0910437 | 46.212  | 2.84636   | 1.241 | 16.5263   | 0.621 | 4.83190 ± 0.28926 | 15.17 ± 0.90  | 82.22       | 2.58        | 0.0238 ± 0.0006 |
| 15D00221                    | 11.7 % | 0.0413607   | 2.959  | 108.1217  | 0.329 | 0.0957816 | 44.422  | 2.74595   | 1.367 | 13.3505   | 0.759 | 3.57718 ± 0.29910 | 11.24 ± 0.94  | 71.63       | 2.45        | 0.0106 ± 0.0003 |
| 15D00222                    | 13.1 % | 0.0730535   | 1.788  | 224.0217  | 0.296 | 0.1407148 | 28.503  | 2.70287   | 1.359 | 11.9108   | 0.864 | 3.05657 ± 0.32764 | 9.61 ± 1.03   | 65.49       | 2.34        | 0.0049 ± 0.0001 |
| 15D00224                    | 14.7 % | 0.1029216   | 1.316  | 328.7379  | 0.289 | 0.0611639 | 67.358  | 2.22495   | 1.657 | 10.1089   | 1.009 | 2.66509 ± 0.43019 | 8.38 ± 1.35   | 52.83       | 1.84        | 0.0026 ± 0.0001 |
| 15D00225                    | 16.5 % | 0.1553004   | 1.014  | 504.7757  | 0.286 | 0.0778394 | 51.824  | 2.10254   | 1.678 | 11.8648   | 0.861 | 3.03595 ± 0.56870 | 9.55 ± 1.78   | 45.11       | 1.62        | 0.0015 ± 0.0001 |
| 15D00226                    | 18.3 % | 0.1471707   | 1.036  | 501.9579  | 0.286 | 0.0649281 | 64.179  | 1.40049   | 2.729 | 8.7082    | 1.183 | 4.12010 ± 0.94276 | 12.94 ± 2.95  | 50.28       | 0.97        | 0.0009 ± 0.0001 |
| 15D00228                    | 20.2 % | 0.1562889   | 0.971  | 519.7331  | 0.286 | 0.0967877 | 43.382  | 1.17125   | 3.132 | 8.4977    | 1.207 | 3.48326 ± 1.19663 | 10.95 ± 3.75  | 33.67       | 0.75        | 0.0007 ± 0.0001 |
| 15D00229                    | 22.2 % | 0.1508778   | 1.010  | 509.5321  | 0.286 | 0.0890061 | 46.698  | 1.05250   | 3.385 | 7.4902    | 1.359 | 3.74449 ± 1.39132 | 11.77 ± 4.36  | 35.47       | 0.65        | 0.0006 ± 0.0001 |
| 15D00231                    | 24.5 % | 0.1413229   | 1.080  | 463.5103  | 0.287 | 0.0488838 | 83.932  | 0.86160   | 4.193 | 6.9357    | 1.481 | 2.42823 ± 1.75462 | 7.64 ± 5.51   | 19.24       | 0.50        | 0.0005 ± 0.0001 |
| Σ                           |        | 2.9989131   | 0.293  | 3316.3857 | 0.107 | 3.7056087 | 6.894   | 111.32503 | 0.200 | 1252.6118 | 0.051 |                   |               |             |             |                 |

| Information on Analysis and Constants Used in Calculations |                                                                 | Results          |                           |                            |              |                           |                 |  |
|------------------------------------------------------------|-----------------------------------------------------------------|------------------|---------------------------|----------------------------|--------------|---------------------------|-----------------|--|
|                                                            |                                                                 | 40(a)/36(a) ± 2σ | 40(r)/39(k) ± 2σ          | Age ± 2σ (Ma)              | MSWD         | 39Ar(k) (% <sub>n</sub> ) | K/Ca ± 2σ       |  |
| Sample = 1180010-2                                         | Age Equations = Min et al. (2000)                               |                  | 5.76063 ± 0.05817 ± 1.01% | 18.07 ± 0.20 ± 1.13%       | 0.96         | 55.37                     | 0.1998 ± 0.0589 |  |
| Material = Groundmass                                      | Negative Intensities = Allowed                                  |                  |                           |                            | 50%          | 18                        |                 |  |
| Location = Kerguelen Plateau                               | Decay Constant 40K = 5.530 ± 0.048 E-10 1/a                     |                  |                           | Full External Error ± 0.46 | 1.69         | 2σ Confidence Limit       |                 |  |
| Analyst = Anthony Koppers                                  | Decay Constant 39Ar = 2.940 ± 0.016 E-07 1/h                    |                  |                           | Analytical Error ± 0.18    | 1.0000       | Error Magnification       |                 |  |
| Project = KERGUELEN   FALLOON (14-PIL-01)                  | Decay Constant 37Ar = 8.230 ± 0.012 E-04 1/h                    |                  |                           |                            |              |                           |                 |  |
| Mass Discrimination Law = LIN                              | Decay Constant 36Cl = 2.257 ± 0.015 E-06 1/a                    |                  |                           |                            |              |                           |                 |  |
| Irradiation = 14-OSU-06 (6C14-14)                          | Decay Constant 40K(EC,β <sup>+</sup> ) = 0.580 ± 0.009 E-10 1/a |                  | 5.73002 ± 0.05459 ± 0.95% | 17.98 ± 0.19 ± 1.08%       |              | 38                        | 0.0141 ± 0.0001 |  |
| J = 0.00174370 ± 0.00000450                                | Decay Constant 40K(β <sup>-</sup> ) = 4.950 ± 0.043 E-10 1/a    |                  |                           | Full External Error ± 0.45 |              |                           |                 |  |
| FCT-NM = 28.201 ± 0.023 Ma                                 | Atmospheric Ratio 40/36(a) = 295.50                             |                  |                           | Analytical Error ± 0.17    |              |                           |                 |  |
| IGSN = Undefined                                           | Atmospheric Ratio 38/36(a) = 0.1869                             |                  |                           |                            |              |                           |                 |  |
| Preferred Age = Undefined                                  | Production Ratio 39/37(ca) = 0.000673                           | 346.64 ± 93.17   | 5.57317 ± 0.29580 ± 5.31% | 17.49 ± 0.93 ± 5.31%       | 0.94         | 55.37                     |                 |  |
| Classification = Undefined                                 | Production Ratio 38/37(ca) = 0.000014                           | ± 26.88%         |                           |                            | 52%          | 18                        |                 |  |
| Experiment Type = Incremental Heating                      | Production Ratio 36/37(ca) = 0.000264                           |                  |                           | Full External Error ± 1.01 | 1.71         | 2σ Confidence Limit       |                 |  |
| Extraction Method = Undefined                              | Production Ratio 40/39(k) = 0.001010                            |                  |                           | Analytical Error ± 0.92    | 1.0000       | Error Magnification       |                 |  |
| Heating = 77 sec                                           | Production Ratio 38/39(k) = 0.011380                            |                  |                           |                            | 100          | Number of Iterations      |                 |  |
| Isolation = 6.00 min                                       | Production Ratio 36/38(cl) = 262.80 ± 1.71                      |                  |                           |                            | 0.0007425016 | Convergence               |                 |  |
| Instrument = ARGUS-VI-D                                    | Scaling Ratio K/Ca = 0.430                                      |                  |                           |                            |              |                           |                 |  |
| Lithology = Undefined                                      | Abundance Ratio 40K/K = 1.1700 ± 0.0100 E-04                    | 353.42 ± 97.28   | 5.58661 ± 0.27586 ± 4.94% | 17.53 ± 0.87 ± 4.94%       | 0.91         | 55.37                     |                 |  |
| Lat-Lon = Undefined - Undefined                            | Atomic Weight K = 39.0983 ± 0.0001 g                            | ± 27.53%         |                           |                            | 55%          | 18                        |                 |  |
| Collector Calibrations = 40Ar 36Ar                         |                                                                 |                  |                           | Full External Error ± 0.95 | 1.71         | 2σ Confidence Limit       |                 |  |
| 15D00180.full.xls printed at 06-07-2015 (15:03)            |                                                                 |                  |                           |                            |              |                           |                 |  |
| ArArCALC v2.6.2 -- Beta Version                            |                                                                 |                  |                           |                            |              |                           |                 |  |



| OSU Argon Geochronology Lab |        |                 |       |                 |      |                  |      |                  |         |                  |      |                 |       |                 |      |                 |      |                  |      |                  |         |                 |      |                  |      |                 |      |                 |       |                 |      |                 |      |
|-----------------------------|--------|-----------------|-------|-----------------|------|------------------|------|------------------|---------|------------------|------|-----------------|-------|-----------------|------|-----------------|------|------------------|------|------------------|---------|-----------------|------|------------------|------|-----------------|------|-----------------|-------|-----------------|------|-----------------|------|
| Degassing Patterns          |        | 36Ar(a)<br>[fA] | %1σ   | 36Ar(c)<br>[fA] | %1σ  | 36Ar(ca)<br>[fA] | %1σ  | 36Ar(cl)<br>[fA] | %1σ     | 37Ar(ca)<br>[fA] | %1σ  | 38Ar(a)<br>[fA] | %1σ   | 38Ar(c)<br>[fA] | %1σ  | 38Ar(k)<br>[fA] | %1σ  | 38Ar(ca)<br>[fA] | %1σ  | 38Ar(cl)<br>[fA] | %1σ     | 39Ar(k)<br>[fA] | %1σ  | 39Ar(ca)<br>[fA] | %1σ  | 40Ar(r)<br>[fA] | %1σ  | 40Ar(a)<br>[fA] | %1σ   | 40Ar(c)<br>[fA] | %1σ  | 40Ar(k)<br>[fA] | %1σ  |
| 15D00181                    | 1.9 %  | 0.9517120       | 0.40  | 0.0000000       | 0.00 | 0.0008286        | 5.22 | 0.0000058        | 78.15   | 3.1388           | 5.22 | 0.1778750       | 0.40  | 0.0000000       | 0.00 | 0.0403561       | 1.00 | 0.0000436        | 5.22 | 0.0537856        | 78.15   | 3.54623         | 1.00 | 0.0021124        | 5.22 | 30.35789        | 3.75 | 281.23089       | 0.40  | 0.0000000       | 0.00 | 0.0035817       | 1.00 |
| 15D00182                    | 2.0 %  | 0.3732153       | 0.57  | 0.0000000       | 0.00 | 0.0006511        | 6.67 | 0.0000069        | 63.30   | 2.4664           | 6.67 | 0.0697539       | 0.57  | 0.0000000       | 0.00 | 0.0391429       | 1.01 | 0.0000343        | 6.67 | 0.0638513        | 63.30   | 3.43962         | 1.01 | 0.0016599        | 6.67 | 25.87284        | 2.49 | 110.28512       | 0.57  | 0.0000000       | 0.00 | 0.0034740       | 1.01 |
| 15D00184                    | 2.1 %  | 0.1676683       | 0.95  | 0.0000000       | 0.00 | 0.0006175        | 7.23 | 0.0000070        | 64.95   | 2.3391           | 7.23 | 0.0313372       | 0.95  | 0.0000000       | 0.00 | 0.0370175       | 1.06 | 0.0000325        | 7.23 | 0.0652009        | 64.96   | 3.25286         | 1.06 | 0.0015742        | 7.23 | 22.69130        | 2.13 | 49.54598        | 0.95  | 0.0000000       | 0.00 | 0.0032854       | 1.06 |
| 15D00185                    | 2.2 %  | 0.0927967       | 1.53  | 0.0000000       | 0.00 | 0.0006343        | 7.17 | 0.0000100        | 44.75   | 2.4028           | 7.17 | 0.0173437       | 1.53  | 0.0000000       | 0.00 | 0.0326704       | 1.28 | 0.0000334        | 7.17 | 0.0924533        | 44.76   | 2.87086         | 1.28 | 0.0016171        | 7.17 | 18.98295        | 2.27 | 27.42142        | 1.53  | 0.0000000       | 0.00 | 0.0028996       | 1.28 |
| 15D00186                    | 2.3 %  | 0.0585860       | 2.29  | 0.0000000       | 0.00 | 0.0005958        | 7.56 | 0.0000027        | 164.33  | 2.2566           | 7.56 | 0.0109497       | 2.29  | 0.0000000       | 0.00 | 0.0329836       | 1.23 | 0.0000314        | 7.56 | 0.0251615        | 164.33  | 2.89839         | 1.23 | 0.0015187        | 7.56 | 19.32870        | 2.12 | 17.31217        | 2.29  | 0.0000000       | 0.00 | 0.0029274       | 1.23 |
| 15D00188                    | 2.4 %  | 0.0456026       | 2.76  | 0.0000000       | 0.00 | 0.0006408        | 6.85 | 0.0000016        | 275.78  | 2.4274           | 6.85 | 0.0085231       | 2.76  | 0.0000000       | 0.00 | 0.0381262       | 1.05 | 0.0000337        | 6.85 | 0.0144699        | 275.78  | 3.35028         | 1.05 | 0.0016336        | 6.85 | 20.78012        | 1.86 | 13.47557        | 2.76  | 0.0000000       | 0.00 | 0.0033838       | 1.05 |
| 15D00189                    | 2.5 %  | 0.0325224       | 3.89  | 0.0000000       | 0.00 | 0.0005213        | 8.31 | 0.0000041        | 112.47  | 1.9746           | 8.31 | 0.0060784       | 3.89  | 0.0000000       | 0.00 | 0.0304205       | 1.36 | 0.0000274        | 8.31 | 0.0378026        | 112.48  | 2.67315         | 1.36 | 0.0013289        | 8.31 | 16.83193        | 2.30 | 9.61035         | 3.89  | 0.0000000       | 0.00 | 0.0026999       | 1.36 |
| 15D00190                    | 2.6 %  | 0.0239594       | 5.03  | 0.0000000       | 0.00 | 0.0004963        | 8.80 | 0.0000026        | 182.43  | 1.8800           | 8.80 | 0.0044780       | 5.03  | 0.0000000       | 0.00 | 0.0300179       | 1.35 | 0.0000261        | 8.80 | 0.0236481        | 182.43  | 2.63778         | 1.35 | 0.0012652        | 8.80 | 16.18340        | 2.29 | 7.08000         | 5.03  | 0.0000000       | 0.00 | 0.0026642       | 1.35 |
| 15D00192                    | 2.7 %  | 0.0201067       | 6.04  | 0.0000000       | 0.00 | 0.0006602        | 6.54 | 0.0000042        | 106.23  | 2.5006           | 6.54 | 0.0037579       | 6.04  | 0.0000000       | 0.00 | 0.0382274       | 1.08 | 0.0000348        | 6.54 | 0.0384755        | 106.24  | 3.35918         | 1.08 | 0.0016829        | 6.54 | 20.67622        | 1.81 | 5.94154         | 6.04  | 0.0000000       | 0.00 | 0.0033928       | 1.08 |
| 15D00193                    | 2.8 %  | 0.0155606       | 7.68  | 0.0000000       | 0.00 | 0.0004768        | 9.30 | 0.0000004        | 1286.02 | 1.8059           | 9.30 | 0.0029083       | 7.68  | 0.0000000       | 0.00 | 0.0291482       | 1.40 | 0.0000251        | 9.30 | 0.0032652        | 1286.02 | 2.56136         | 1.40 | 0.0012154        | 9.30 | 15.87063        | 2.32 | 4.59815         | 7.68  | 0.0000000       | 0.00 | 0.0025870       | 1.40 |
| 15D00194                    | 2.9 %  | ✓ 0.0147324     | 8.03  | 0.0000000       | 0.00 | 0.0005358        | 8.30 | 0.0000048        | 93.06   | 2.0294           | 8.30 | 0.0027535       | 8.03  | 0.0000000       | 0.00 | 0.0320482       | 1.33 | 0.0000282        | 8.30 | 0.0443775        | 93.07   | 2.81618         | 1.33 | 0.0013658        | 8.30 | 16.54452        | 2.20 | 4.35343         | 8.03  | 0.0000000       | 0.00 | 0.0028443       | 1.33 |
| 15D00196                    | 3.0 %  | ✓ 0.0134036     | 9.08  | 0.0000000       | 0.00 | 0.0005251        | 8.60 | 0.0000000        | #####   | 1.9889           | 8.60 | 0.0025051       | 9.08  | 0.0000000       | 0.00 | 0.0348403       | 1.24 | 0.0000276        | 8.60 | 0.0000779        | #####   | 3.06154         | 1.24 | 0.0013385        | 8.60 | 18.43252        | 2.03 | 3.96075         | 9.08  | 0.0000000       | 0.00 | 0.0030922       | 1.24 |
| 15D00197                    | 3.2 %  | ✓ 0.0117256     | 9.78  | 0.0000000       | 0.00 | 0.0005347        | 8.18 | 0.0000077        | 62.38   | 2.0255           | 8.18 | 0.0021915       | 9.78  | 0.0000000       | 0.00 | 0.0316486       | 1.29 | 0.0000282        | 8.18 | 0.0708454        | 62.39   | 2.78107         | 1.29 | 0.0013632        | 8.18 | 15.56822        | 2.27 | 3.46492         | 9.78  | 0.0000000       | 0.00 | 0.0028089       | 1.29 |
| 15D00198                    | 3.4 %  | ✓ 0.0116713     | 10.25 | 0.0000000       | 0.00 | 0.0006181        | 7.10 | 0.0000000        | 0.00    | 2.3414           | 7.10 | 0.0021814       | 10.25 | 0.0000000       | 0.00 | 0.0363521       | 1.09 | 0.0000325        | 7.10 | 0.0000000        | 0.00    | 3.19439         | 1.09 | 0.0015758        | 7.10 | 18.01243        | 2.04 | 3.44887         | 10.25 | 0.0000000       | 0.00 | 0.0032263       | 1.09 |
| 15D00200                    | 3.6 %  | ✓ 0.0113737     | 10.38 | 0.0000000       | 0.00 | 0.0006316        | 7.26 | 0.0000012        | 391.15  | 2.3924           | 7.26 | 0.0021257       | 10.38 | 0.0000000       | 0.00 | 0.0393632       | 1.02 | 0.0000333        | 7.26 | 0.0110270        | 391.16  | 3.45898         | 1.02 | 0.0016101        | 7.26 | 19.72243        | 1.84 | 3.36093         | 10.38 | 0.0000000       | 0.00 | 0.0034936       | 1.02 |
| 15D00201                    | 3.8 %  | ✓ 0.0103375     | 11.18 | 0.0000000       | 0.00 | 0.0006602        | 6.74 | 0.0000049        | 93.39   | 2.5006           | 6.74 | 0.0019321       | 11.18 | 0.0000000       | 0.00 | 0.0356005       | 1.21 | 0.0000348        | 6.74 | 0.0454184        | 93.39   | 3.12834         | 1.21 | 0.0016829        | 6.74 | 17.23444        | 2.07 | 3.05474         | 11.18 | 0.0000000       | 0.00 | 0.0031596       | 1.21 |
| 15D00202                    | 4.0 %  | ✓ 0.0101866     | 11.42 | 0.0000000       | 0.00 | 0.0006780        | 6.71 | 0.0000014        | 317.74  | 2.5683           | 6.71 | 0.0019039       | 11.42 | 0.0000000       | 0.00 | 0.0375514       | 1.04 | 0.0000357        | 6.71 | 0.0126998        | 317.74  | 3.29977         | 1.04 | 0.0017285        | 6.71 | 18.82214        | 1.91 | 3.01015         | 11.42 | 0.0000000       | 0.00 | 0.0033328       | 1.04 |
| 15D00204                    | 4.3 %  | ✓ 0.0115843     | 10.24 | 0.0000000       | 0.00 | 0.0008100        | 5.40 | 0.0000097        | 45.81   | 3.0681           | 5.40 | 0.0021651       | 10.24 | 0.0000000       | 0.00 | 0.0460554       | 0.90 | 0.0000426        | 5.40 | 0.0894970        | 45.82   | 4.04705         | 0.90 | 0.0020648        | 5.40 | 23.76594        | 1.54 | 3.42315         | 10.24 | 0.0000000       | 0.00 | 0.0040875       | 0.90 |
| 15D00205                    | 4.6 %  | ✓ 0.0087941     | 13.13 | 0.0000000       | 0.00 | 0.0007440        | 5.80 | 0.0000057        | 77.85   | 2.8182           | 5.80 | 0.0016436       | 13.13 | 0.0000000       | 0.00 | 0.0423662       | 0.94 | 0.0000392        | 5.80 | 0.0524126        | 77.85   | 3.72286         | 0.94 | 0.0018967        | 5.80 | 21.54347        | 1.66 | 2.59866         | 13.13 | 0.0000000       | 0.00 | 0.0037601       | 0.94 |
| 15D00206                    | 4.9 %  | ✓ 0.0098284     | 11.65 | 0.0000000       | 0.00 | 0.0007359        | 6.08 | 0.0000061        | 71.03   | 2.7873           | 6.08 | 0.0018369       | 11.65 | 0.0000000       | 0.00 | 0.0409774       | 1.03 | 0.0000387        | 6.08 | 0.0565910        | 71.04   | 3.60083         | 1.03 | 0.0018759        | 6.08 | 21.25571        | 1.66 | 2.90430         | 11.65 | 0.0000000       | 0.00 | 0.0036368       | 1.03 |
| 15D00208                    | 5.2 %  | ✓ 0.0102386     | 11.53 | 0.0000000       | 0.00 | 0.0008810        | 4.77 | 0.0000135        | 32.65   | 3.3372           | 4.77 | 0.0019136       | 11.53 | 0.0000000       | 0.00 | 0.0474025       | 0.88 | 0.0000464        | 4.77 | 0.1247526        | 32.67   | 4.16542         | 0.88 | 0.0022459        | 4.77 | 23.71778        | 1.53 | 3.02551         | 11.53 | 0.0000000       | 0.00 | 0.0042071       | 0.88 |
| 15D00209                    | 5.5 %  | ✓ 0.0081227     | 14.29 | 0.0000000       | 0.00 | 0.0007119        | 6.17 | 0.0000051        | 87.24   | 2.6965           | 6.17 | 0.0015181       | 14.29 | 0.0000000       | 0.00 | 0.0391724       | 1.04 | 0.0000375        | 6.17 | 0.0472384        | 87.25   | 3.44221         | 1.04 | 0.0018147        | 6.17 | 19.91676        | 1.80 | 2.40027         | 14.29 | 0.0000000       | 0.00 | 0.0034766       | 1.04 |
| 15D00210                    | 5.8 %  | ✓ 0.0098002     | 12.14 | 0.0000000       | 0.00 | 0.0007464        | 5.86 | 0.0000049        | 88.72   | 2.8271           | 5.86 | 0.0018317       | 12.14 | 0.0000000       | 0.00 | 0.0387093       | 1.02 | 0.0000393        | 5.86 | 0.0450731        | 88.72   | 3.40152         | 1.02 | 0.0019027        | 5.86 | 19.59324        | 1.87 | 2.89596         | 12.14 | 0.0000000       | 0.00 | 0.0034355       | 1.02 |
| 15D00212                    | 6.1 %  | ✓ 0.0074703     | 15.74 | 0.0000000       | 0.00 | 0.0007269        | 6.04 | 0.0000048        | 93.33   | 2.7534           | 6.04 | 0.0013962       | 15.74 | 0.0000000       | 0.00 | 0.0389204       | 1.05 | 0.0000383        | 6.04 | 0.0439482        | 93.33   | 3.42007         | 1.05 | 0.0018531        | 6.04 | 20.08611        | 1.80 | 2.20749         | 15.74 | 0.0000000       | 0.00 | 0.0034543       | 1.05 |
| 15D00213                    | 6.5 %  | ✓ 0.0079569     | 14.60 | 0.0000000       | 0.00 | 0.0007640        | 5.89 | 0.0000117        | 38.70   | 2.8938           | 5.89 | 0.0014871       | 14.60 | 0.0000000       | 0.00 | 0.0357798       | 1.20 | 0.0000402        | 5.89 | 0.1083482        | 38.71   | 3.14410         | 1.20 | 0.0019476        | 5.89 | 18.32500        | 1.96 | 2.35125         | 14.60 | 0.0000000       | 0.00 | 0.0031755       | 1.20 |
| 15D00214                    | 7.0 %  | ✓ 0.0087564     | 13.15 | 0.0000000       | 0.00 | 0.0009546        | 4.69 | 0.0000064        | 69.64   | 3.6158           | 4.69 | 0.0016366       | 13.15 | 0.0000000       | 0.00 | 0.0373303       | 1.09 | 0.0000503        | 4.69 | 0.0593239        | 69.65   | 3.28034         | 1.09 | 0.0024334        | 4.69 | 19.01697        | 1.87 | 2.58752         | 13.15 | 0.0000000       | 0.00 | 0.0033131       | 1.09 |
| 15D00216                    | 7.6 %  | ✓ 0.0118886     | 9.93  | 0.0000000       | 0.00 | 0.0013557        | 3.25 | 0.0000090        | 49.96   | 5.1353           | 3.25 | 0.0022220       | 9.93  | 0.0000000       | 0.00 | 0.0365181       | 1.14 | 0.0000714        | 3.25 | 0.0834672        | 49.97   | 3.20897         | 1.14 | 0.0034561        | 3.25 | 18.38838        | 1.98 | 3.51308         | 9.93  | 0.0000000       | 0.00 | 0.0032411       | 1.14 |
| 15D00217                    | 8.4 %  | ✓ 0.0095433     | 11.79 | 0.0000000       | 0.00 | 0.0024972        | 1.80 | 0.0000082        | 54.40   | 9.4589           | 1.80 | 0.0017836       | 11.79 | 0.0000000       | 0.00 | 0.0367166       | 1.11 | 0.0001315        | 1.80 | 0.0756690        | 54.41   | 3.22642         | 1.11 | 0.0063659        | 1.80 | 18.04747        | 1.93 | 2.82004         | 11.79 | 0.0000000       | 0.00 | 0.0032587       | 1.11 |
| 15D00218                    | 9.4 %  | 0.0101873       | 11.27 | 0.0000000       | 0.00 | 0.0065521        | 0.72 | 0.0000130        | 33.88   | 24.8187          | 0.72 | 0.0019040       | 11.27 | 0.0000000       | 0.00 | 0.0359144       | 1.18 | 0.0003450        | 0.72 | 0.1203284        | 33.89   | 3.15592         | 1.18 | 0.0167030        | 0.72 | 16.66144        | 2.13 | 3.01035         | 11.27 | 0.0000000       | 0.00 | 0.0031875       | 1.18 |
| 15D00220                    | 10.5 % | 0.0099327       | 12.08 | 0.0000000       | 0.00 | 0.0133970        | 0.44 | 0.0000061        | 74.50   | 50.7460          | 0.44 | 0.0018564       | 12.08 | 0.0000000       | 0.00 | 0.0320029       | 1.26 | 0.0007054        | 0.44 | 0.0564790        | 74.51   | 2.81220         | 1.26 | 0.0341521        | 0.44 | 13.58830        | 2.72 | 2.93512         | 12.08 | 0.0000000       | 0.00 |                 |      |



| Additional<br>Parameters |        | 40Ar/39Ar  | 1σ       | 37Ar/39Ar  | 1σ        | 36Ar/39Ar | 1σ       | Time<br>(days) | 37Ar<br>(decay) | 39Ar<br>(decay) | 40Ar<br>(moles) |
|--------------------------|--------|------------|----------|------------|-----------|-----------|----------|----------------|-----------------|-----------------|-----------------|
| 15D00181                 | 1.9 %  | 87.813569  | 0.881757 | 0.884588   | 0.047009  | 0.268449  | 0.002902 | 66.428         | 3.723124        | 1.00046971      | 1.496E-11       |
| 15D00182                 | 2.0 %  | 39.567051  | 0.402940 | 0.716699   | 0.048346  | 0.108644  | 0.001261 | 66.437         | 3.723737        | 1.00046977      | 6.536E-12       |
| 15D00184                 | 2.1 %  | 22.197581  | 0.237304 | 0.718746   | 0.052530  | 0.051712  | 0.000734 | 66.454         | 3.725014        | 1.00046989      | 3.468E-12       |
| 15D00185                 | 2.2 %  | 16.155827  | 0.209368 | 0.836478   | 0.060918  | 0.032530  | 0.000644 | 66.463         | 3.725679        | 1.00046996      | 2.228E-12       |
| 15D00186                 | 2.3 %  | 12.636201  | 0.159870 | 0.778178   | 0.059582  | 0.020409  | 0.000527 | 66.472         | 3.726292        | 1.00047002      | 1.759E-12       |
| 15D00188                 | 2.4 %  | 10.220757  | 0.111558 | 0.724175   | 0.050214  | 0.013797  | 0.000403 | 66.489         | 3.727570        | 1.00047014      | 1.644E-12       |
| 15D00189                 | 2.5 %  | 9.887890   | 0.139396 | 0.738325   | 0.062184  | 0.012357  | 0.000501 | 66.497         | 3.728183        | 1.00047020      | 1.269E-12       |
| 15D00190                 | 2.6 %  | 8.816107   | 0.125568 | 0.712381   | 0.063428  | 0.009268  | 0.000473 | 66.506         | 3.728848        | 1.00047026      | 1.117E-12       |
| 15D00192                 | 2.7 %  | 7.920933   | 0.091207 | 0.744036   | 0.049339  | 0.006180  | 0.000367 | 66.523         | 3.730076        | 1.00047038      | 1.278E-12       |
| 15D00193                 | 2.8 %  | 7.988600   | 0.118974 | 0.704713   | 0.066270  | 0.006258  | 0.000474 | 66.532         | 3.730741        | 1.00047044      | 9.826E-13       |
| 15D00194                 | 2.9 %  | ✓ 7.418081 | 0.105323 | 0.720283   | 0.060525  | 0.005421  | 0.000426 | 66.540         | 3.731355        | 1.00047050      | 1.003E-12       |
| 15D00196                 | 3.0 %  | ✓ 7.312200 | 0.096732 | 0.649364   | 0.056446  | 0.004548  | 0.000401 | 66.558         | 3.732635        | 1.00047062      | 1.075E-12       |
| 15D00197                 | 3.2 %  | ✓ 6.841471 | 0.095681 | 0.727960   | 0.060318  | 0.004409  | 0.000416 | 66.567         | 3.733301        | 1.00047069      | 9.137E-13       |
| 15D00198                 | 3.4 %  | ✓ 6.716137 | 0.079697 | 0.732617   | 0.052599  | 0.003845  | 0.000376 | 66.575         | 3.733915        | 1.00047075      | 1.030E-12       |
| 15D00200                 | 3.6 %  | ✓ 6.671359 | 0.073825 | 0.691334   | 0.050695  | 0.003469  | 0.000343 | 66.592         | 3.735196        | 1.00047087      | 1.108E-12       |
| 15D00201                 | 3.8 %  | ✓ 6.483127 | 0.085040 | 0.798918   | 0.054744  | 0.003515  | 0.000371 | 66.601         | 3.735811        | 1.00047093      | 9.740E-13       |
| 15D00202                 | 4.0 %  | ✓ 6.613855 | 0.075636 | 0.777930   | 0.052835  | 0.003291  | 0.000354 | 66.610         | 3.736477        | 1.00047099      | 1.048E-12       |
| 15D00204                 | 4.3 %  | ✓ 6.715838 | 0.065466 | 0.757710   | 0.041489  | 0.003063  | 0.000294 | 66.627         | 3.737759        | 1.00047111      | 1.305E-12       |
| 15D00205                 | 4.6 %  | ✓ 6.482539 | 0.067133 | 0.756616   | 0.044452  | 0.002562  | 0.000311 | 66.635         | 3.738374        | 1.00047117      | 1.159E-12       |
| 15D00206                 | 4.9 %  | ✓ 6.707084 | 0.074595 | 0.773678   | 0.047704  | 0.002934  | 0.000319 | 66.644         | 3.738989        | 1.00047123      | 1.160E-12       |
| 15D00208                 | 5.2 %  | ✓ 6.417858 | 0.061542 | 0.800729   | 0.038860  | 0.002671  | 0.000284 | 66.661         | 3.740272        | 1.00047135      | 1.284E-12       |
| 15D00209                 | 5.5 %  | ✓ 6.480928 | 0.073670 | 0.782948   | 0.048968  | 0.002567  | 0.000338 | 66.670         | 3.740939        | 1.00047142      | 1.071E-12       |
| 15D00210                 | 5.8 %  | ✓ 6.608831 | 0.073912 | 0.830677   | 0.049384  | 0.003100  | 0.000351 | 66.678         | 3.741555        | 1.00047148      | 1.080E-12       |
| 15D00212                 | 6.1 %  | ✓ 6.515950 | 0.074592 | 0.804647   | 0.049298  | 0.002397  | 0.000344 | 66.696         | 3.742838        | 1.00047160      | 1.070E-12       |
| 15D00213                 | 6.5 %  | ✓ 6.573151 | 0.085123 | 0.919836   | 0.055304  | 0.002776  | 0.000371 | 66.704         | 3.743454        | 1.00047166      | 9.926E-13       |
| 15D00214                 | 7.0 %  | ✓ 6.582173 | 0.078224 | 1.101442   | 0.052994  | 0.002960  | 0.000352 | 66.713         | 3.744121        | 1.00047172      | 1.037E-12       |
| 15D00216                 | 7.6 %  | ✓ 6.818739 | 0.084261 | 1.598578   | 0.055003  | 0.004126  | 0.000370 | 66.731         | 3.745406        | 1.00047184      | 1.051E-12       |
| 15D00217                 | 8.4 %  | ✓ 6.455974 | 0.078303 | 2.925945   | 0.061816  | 0.003727  | 0.000350 | 66.739         | 3.746022        | 1.00047190      | 1.002E-12       |
| 15D00218                 | 9.4 %  | 6.201476   | 0.079803 | 7.822747   | 0.107905  | 0.005280  | 0.000367 | 66.748         | 3.746690        | 1.00047197      | 9.444E-13       |
| 15D00220                 | 10.5 % | 5.806113   | 0.080588 | 17.828419  | 0.235001  | 0.008198  | 0.000433 | 66.765         | 3.747924        | 1.00047208      | 7.933E-13       |
| 15D00221                 | 11.7 % | 4.861883   | 0.076024 | 39.374946  | 0.553555  | 0.015062  | 0.000491 | 66.774         | 3.748592        | 1.00047215      | 6.408E-13       |
| 15D00222                 | 13.1 % | 4.406717   | 0.070965 | 82.882758  | 1.152579  | 0.027028  | 0.000607 | 66.782         | 3.749209        | 1.00047221      | 5.717E-13       |
| 15D00224                 | 14.7 % | 4.543454   | 0.088135 | 147.750871 | 2.484896  | 0.046258  | 0.000979 | 66.799         | 3.750495        | 1.00047233      | 4.852E-13       |
| 15D00225                 | 16.5 % | 5.643098   | 0.106443 | 240.079145 | 4.087578  | 0.073863  | 0.001448 | 66.808         | 3.751164        | 1.00047239      | 5.695E-13       |
| 15D00226                 | 18.3 % | 6.217963   | 0.184975 | 358.415716 | 9.836410  | 0.105085  | 0.003068 | 66.817         | 3.751781        | 1.00047245      | 4.180E-13       |
| 15D00228                 | 20.2 % | 7.255234   | 0.243481 | 443.741014 | 13.953816 | 0.133437  | 0.004375 | 66.834         | 3.753068        | 1.00047257      | 4.079E-13       |
| 15D00229                 | 22.2 % | 7.116610   | 0.259586 | 484.116260 | 16.444788 | 0.143352  | 0.005063 | 66.842         | 3.753686        | 1.00047263      | 3.595E-13       |
| 15D00231                 | 24.5 % | 8.049860   | 0.357964 | 537.966463 | 22.609745 | 0.164024  | 0.007102 | 66.860         | 3.754973        | 1.00047276      | 3.329E-13       |



| Procedure<br>Blanks |        | 36Ar<br>[fA] | 1σ        | 37Ar<br>[fA] | 1σ        | 38Ar<br>[fA] | 1σ        | 39Ar<br>[fA] | 1σ        | 40Ar<br>[fA] | 1σ        |
|---------------------|--------|--------------|-----------|--------------|-----------|--------------|-----------|--------------|-----------|--------------|-----------|
| 15D00181            | 1.9 %  | 0.0375698    | 0.0009554 | 0.0038612    | 0.0332442 | 0.0586526    | 0.0312086 | 0.0487989    | 0.0252248 | 10.6973592   | 0.0985150 |
| 15D00182            | 2.0 %  | 0.0368966    | 0.0009554 | 0.0117081    | 0.0332442 | 0.0569521    | 0.0312086 | 0.0422295    | 0.0252248 | 10.5651400   | 0.0985150 |
| 15D00184            | 2.1 %  | 0.0356966    | 0.0009554 | 0.0245258    | 0.0332442 | 0.0528234    | 0.0312086 | 0.0310415    | 0.0252248 | 10.3230364   | 0.0985150 |
| 15D00185            | 2.2 %  | 0.0351702    | 0.0009554 | 0.0295008    | 0.0332442 | 0.0504926    | 0.0312086 | 0.0264418    | 0.0252248 | 10.2133057   | 0.0985150 |
| 15D00186            | 2.3 %  | 0.0347372    | 0.0009554 | 0.0331805    | 0.0332442 | 0.0483019    | 0.0312086 | 0.0228672    | 0.0252248 | 10.1208757   | 0.0985150 |
| 15D00188            | 2.4 %  | 0.0339806    | 0.0009554 | 0.0383666    | 0.0332442 | 0.0438192    | 0.0312086 | 0.0172864    | 0.0252248 | 9.9528551    | 0.0985150 |
| 15D00189            | 2.5 %  | 0.0336792    | 0.0009554 | 0.0398160    | 0.0332442 | 0.0417930    | 0.0312086 | 0.0154109    | 0.0252248 | 9.8827456    | 0.0985150 |
| 15D00190            | 2.6 %  | 0.0333921    | 0.0009554 | 0.0407323    | 0.0332442 | 0.0397479    | 0.0312086 | 0.0139001    | 0.0252248 | 9.8136325    | 0.0985150 |
| 15D00192            | 2.7 %  | 0.0329556    | 0.0009554 | 0.0409091    | 0.0332442 | 0.0365180    | 0.0312086 | 0.0123626    | 0.0252248 | 9.7025366    | 0.0985150 |
| 15D00193            | 2.8 %  | 0.0327624    | 0.0009554 | 0.0403271    | 0.0332442 | 0.0351297    | 0.0312086 | 0.0121161    | 0.0252248 | 9.6501595    | 0.0985150 |
| 15D00194            | 2.9 %  | 0.0326068    | 0.0009554 | 0.0394498    | 0.0332442 | 0.0341077    | 0.0312086 | 0.0122002    | 0.0252248 | 9.6060263    | 0.0985150 |
| 15D00196            | 3.0 %  | 0.0323402    | 0.0009554 | 0.0368174    | 0.0332442 | 0.0328657    | 0.0312086 | 0.0131739    | 0.0252248 | 9.5252023    | 0.0985150 |
| 15D00197            | 3.2 %  | 0.0322263    | 0.0009554 | 0.0351412    | 0.0332442 | 0.0327300    | 0.0312086 | 0.0140236    | 0.0252248 | 9.4881871    | 0.0985150 |
| 15D00198            | 3.4 %  | 0.0321328    | 0.0009554 | 0.0334769    | 0.0332442 | 0.0329308    | 0.0312086 | 0.0149680    | 0.0252248 | 9.4565474    | 0.0985150 |
| 15D00200            | 3.6 %  | 0.0319642    | 0.0009554 | 0.0298467    | 0.0332442 | 0.0343830    | 0.0312086 | 0.0172876    | 0.0252248 | 9.3970053    | 0.0985150 |
| 15D00201            | 3.8 %  | 0.0318920    | 0.0009554 | 0.0281124    | 0.0332442 | 0.0355810    | 0.0312086 | 0.0185063    | 0.0252248 | 9.3708823    | 0.0985150 |
| 15D00202            | 4.0 %  | 0.0318173    | 0.0009554 | 0.0262991    | 0.0332442 | 0.0372430    | 0.0312086 | 0.0198586    | 0.0252248 | 9.3439805    | 0.0985150 |
| 15D00204            | 4.3 %  | 0.0316776    | 0.0009554 | 0.0231603    | 0.0332442 | 0.0414727    | 0.0312086 | 0.0224282    | 0.0252248 | 9.2953383    | 0.0985150 |
| 15D00205            | 4.6 %  | 0.0316097    | 0.0009554 | 0.0218828    | 0.0332442 | 0.0439632    | 0.0312086 | 0.0235923    | 0.0252248 | 9.2730376    | 0.0985150 |
| 15D00206            | 4.9 %  | 0.0315398    | 0.0009554 | 0.0207917    | 0.0332442 | 0.0467321    | 0.0312086 | 0.0246783    | 0.0252248 | 9.2512069    | 0.0985150 |
| 15D00208            | 5.2 %  | 0.0313839    | 0.0009554 | 0.0192225    | 0.0332442 | 0.0533098    | 0.0312086 | 0.0265921    | 0.0252248 | 9.2067268    | 0.0985150 |
| 15D00209            | 5.5 %  | 0.0312960    | 0.0009554 | 0.0188321    | 0.0332442 | 0.0571060    | 0.0312086 | 0.0273508    | 0.0252248 | 9.1839298    | 0.0985150 |
| 15D00210            | 5.8 %  | 0.0312100    | 0.0009554 | 0.0187558    | 0.0332442 | 0.0607984    | 0.0312086 | 0.0278791    | 0.0252248 | 9.1630116    | 0.0985150 |
| 15D00212            | 6.1 %  | 0.0310153    | 0.0009554 | 0.0195343    | 0.0332442 | 0.0689261    | 0.0312086 | 0.0283695    | 0.0252248 | 9.1197514    | 0.0985150 |
| 15D00213            | 6.5 %  | 0.0309145    | 0.0009554 | 0.0203803    | 0.0332442 | 0.0729595    | 0.0312086 | 0.0282775    | 0.0252248 | 9.0991749    | 0.0985150 |
| 15D00214            | 7.0 %  | 0.0308001    | 0.0009554 | 0.0216544    | 0.0332442 | 0.0773620    | 0.0312086 | 0.0279147    | 0.0252248 | 9.0770972    | 0.0985150 |
| 15D00216            | 7.6 %  | 0.0305675    | 0.0009554 | 0.0251664    | 0.0332442 | 0.0857163    | 0.0312086 | 0.0263869    | 0.0252248 | 9.0356611    | 0.0985150 |
| 15D00217            | 8.4 %  | 0.0304513    | 0.0009554 | 0.0273494    | 0.0332442 | 0.0895678    | 0.0312086 | 0.0252404    | 0.0252248 | 9.0165018    | 0.0985150 |
| 15D00218            | 9.4 %  | 0.0303235    | 0.0009554 | 0.0300741    | 0.0332442 | 0.0935401    | 0.0312086 | 0.0236796    | 0.0252248 | 8.9965157    | 0.0985150 |
| 15D00220            | 10.5 % | 0.0300869    | 0.0009554 | 0.0360597    | 0.0332442 | 0.1000809    | 0.0312086 | 0.0198910    | 0.0252248 | 8.9625104    | 0.0985150 |
| 15D00221            | 11.7 % | 0.0299614    | 0.0009554 | 0.0397969    | 0.0332442 | 0.1030494    | 0.0312086 | 0.0173308    | 0.0252248 | 8.9461667    | 0.0985150 |
| 15D00222            | 13.1 % | 0.0298495    | 0.0009554 | 0.0435370    | 0.0332442 | 0.1053369    | 0.0312086 | 0.0146426    | 0.0252248 | 8.9327311    | 0.0985150 |
| 15D00224            | 14.7 % | 0.0296359    | 0.0009554 | 0.0521503    | 0.0332442 | 0.1083878    | 0.0312086 | 0.0080219    | 0.0252248 | 8.9111186    | 0.0985150 |
| 15D00225            | 16.5 % | 0.0295400    | 0.0009554 | 0.0570205    | 0.0332442 | 0.1088786    | 0.0312086 | 0.0040282    | 0.0252248 | 8.9040511    | 0.0985150 |
| 15D00226            | 18.3 % | 0.0294638    | 0.0009554 | 0.0617202    | 0.0332442 | 0.1085512    | 0.0312086 | 0.0000054    | 0.0252248 | 8.9005705    | 0.0985150 |
| 15D00228            | 20.2 % | 0.0293539    | 0.0009554 | 0.0720209    | 0.0332442 | 0.1050854    | 0.0312086 | 0.0094093    | 0.0252248 | 8.9044453    | 0.0985150 |
| 15D00229            | 22.2 % | 0.0293301    | 0.0009554 | 0.0771467    | 0.0332442 | 0.1019000    | 0.0312086 | 0.0144204    | 0.0252248 | 8.9125321    | 0.0985150 |
| 15D00231            | 24.5 % | 0.0293563    | 0.0009554 | 0.0880163    | 0.0332442 | 0.0915766    | 0.0312086 | 0.0258644    | 0.0252248 | 8.9448973    | 0.0985150 |



| OSU Argon Geochronology Lab |        |           |           |        |                |      |          |        |        |                |      |           |           |        |                |      |         |         |        |                |      |           |         |        |                |
|-----------------------------|--------|-----------|-----------|--------|----------------|------|----------|--------|--------|----------------|------|-----------|-----------|--------|----------------|------|---------|---------|--------|----------------|------|-----------|---------|--------|----------------|
| Intercept<br>Values         | 36Ar   |           |           |        |                | 37Ar |          |        |        |                | 38Ar |           |           |        |                | 39Ar |         |         |        |                | 40Ar |           |         |        |                |
|                             |        | [fA]      | 1σ        | r2     |                |      | [fA]     | 1σ     | r2     |                |      | [fA]      | 1σ        | r2     |                |      | [fA]    | 1σ      | r2     |                |      | [fA]      | 1σ      | r2     |                |
| 15D00181                    | 1.9 %  | 0.9314940 | 0.0021395 | 0.8369 | EXP 150 of 150 |      | 0.8307   | 0.0274 | 0.0757 | EXP 150 of 150 |      | 0.2099038 | 0.0273209 | 0.0011 | EXP 150 of 150 |      | 3.57267 | 0.02466 | 0.0987 | EXP 150 of 150 |      | 323.22480 | 0.05824 | 0.9922 | EXP 150 of 150 |
| 15D00182                    | 2.0 %  | 0.3877607 | 0.0013708 | 0.4478 | EXP 150 of 150 |      | 0.6613   | 0.0277 | 0.0045 | EXP 150 of 150 |      | 0.1136050 | 0.0248383 | 0.0003 | EXP 150 of 150 |      | 3.45979 | 0.02358 | 0.0717 | EXP 150 of 150 |      | 147.13520 | 0.10750 | 0.7920 | EXP 150 of 150 |
| 15D00184                    | 2.1 %  | 0.1936323 | 0.0010355 | 0.0045 | EXP 150 of 150 |      | 0.6404   | 0.0296 | 0.0092 | EXP 150 of 150 |      | 0.0790443 | 0.0278024 | 0.0016 | EXP 150 of 150 |      | 3.26304 | 0.02300 | 0.1276 | EXP 150 of 150 |      | 82.78039  | 0.04477 | 0.9879 | EXP 150 of 150 |
| 15D00185                    | 2.2 %  | 0.1228606 | 0.0008786 | 0.2858 | EXP 150 of 150 |      | 0.6620   | 0.0308 | 0.0334 | EXP 150 of 150 |      | 0.0901729 | 0.0263223 | 0.0036 | EXP 150 of 150 |      | 2.87911 | 0.02616 | 0.1316 | EXP 150 of 150 |      | 56.75984  | 0.03828 | 0.9941 | EXP 150 of 150 |
| 15D00186                    | 2.3 %  | 0.0902793 | 0.0008001 | 0.4937 | EXP 150 of 150 |      | 0.6271   | 0.0301 | 0.0108 | EXP 150 of 150 |      | 0.0199340 | 0.0262957 | 0.0078 | EXP 150 of 150 |      | 2.90278 | 0.02492 | 0.1206 | EXP 149 of 150 |      | 46.87464  | 0.03317 | 0.9958 | EXP 150 of 150 |
| 15D00188                    | 2.4 %  | 0.0773796 | 0.0006781 | 0.5006 | EXP 150 of 150 |      | 0.6770   | 0.0284 | 0.0328 | EXP 150 of 150 |      | 0.0165461 | 0.0240288 | 0.0114 | EXP 150 of 150 |      | 3.34609 | 0.02403 | 0.2814 | EXP 150 of 150 |      | 44.31474  | 0.03236 | 0.9951 | EXP 150 of 150 |
| 15D00189                    | 2.5 %  | 0.0646931 | 0.0006933 | 0.5304 | EXP 150 of 150 |      | 0.5592   | 0.0275 | 0.0173 | EXP 150 of 150 |      | 0.0315787 | 0.0280557 | 0.0000 | EXP 150 of 150 |      | 2.67145 | 0.02559 | 0.0981 | EXP 150 of 150 |      | 36.40709  | 0.03169 | 0.9957 | EXP 150 of 150 |
| 15D00190                    | 2.6 %  | 0.0563451 | 0.0005948 | 0.6044 | EXP 150 of 150 |      | 0.5352   | 0.0280 | 0.0093 | EXP 150 of 150 |      | 0.0176730 | 0.0289691 | 0.0014 | EXP 150 of 150 |      | 2.63474 | 0.02490 | 0.2257 | EXP 150 of 150 |      | 33.14952  | 0.03022 | 0.9961 | EXP 150 of 150 |
| 15D00192                    | 2.7 %  | 0.0524483 | 0.0006128 | 0.6393 | EXP 150 of 150 |      | 0.6984   | 0.0272 | 0.0254 | EXP 149 of 150 |      | 0.0429409 | 0.0255635 | 0.0060 | EXP 150 of 150 |      | 3.35005 | 0.02578 | 0.1555 | EXP 150 of 150 |      | 36.40358  | 0.03510 | 0.9935 | EXP 150 of 150 |
| 15D00193                    | 2.8 %  | 0.0478131 | 0.0005814 | 0.6279 | EXP 150 of 150 |      | 0.5150   | 0.0290 | 0.0003 | EXP 149 of 150 |      | 0.0002381 | 0.0272738 | 0.0014 | EXP 149 of 150 |      | 2.55702 | 0.02516 | 0.0216 | EXP 150 of 150 |      | 30.18296  | 0.03131 | 0.9952 | EXP 150 of 150 |
| 15D00194                    | 2.9 %  | 0.0469398 | 0.0005603 | 0.5953 | EXP 150 of 150 |      | 0.5728   | 0.0292 | 0.0451 | EXP 150 of 150 |      | 0.0440794 | 0.0262213 | 0.0022 | EXP 150 of 150 |      | 2.81032 | 0.02741 | 0.1861 | EXP 150 of 150 |      | 30.56955  | 0.02799 | 0.9960 | EXP 149 of 150 |
| 15D00196                    | 3.0 %  | 0.0454117 | 0.0006212 | 0.6128 | EXP 150 of 150 |      | 0.5594   | 0.0302 | 0.0001 | EXP 150 of 150 |      | 0.0041029 | 0.0264688 | 0.0029 | EXP 150 of 150 |      | 3.05493 | 0.02797 | 0.2219 | EXP 150 of 150 |      | 31.98878  | 0.03119 | 0.9941 | EXP 150 of 150 |
| 15D00197                    | 3.2 %  | 0.0437393 | 0.0004886 | 0.6281 | EXP 150 of 150 |      | 0.5672   | 0.0281 | 0.0260 | EXP 150 of 150 |      | 0.0706350 | 0.0304717 | 0.0482 | EXP 150 of 150 |      | 2.77727 | 0.02509 | 0.2547 | EXP 150 of 150 |      | 28.58127  | 0.03145 | 0.9944 | EXP 150 of 150 |
| 15D00198                    | 3.4 %  | 0.0436659 | 0.0005847 | 0.5399 | EXP 150 of 150 |      | 0.6484   | 0.0282 | 0.0107 | EXP 150 of 150 |      | 0.0072279 | 0.0266472 | 0.0118 | EXP 150 of 150 |      | 3.18889 | 0.02343 | 0.3057 | EXP 150 of 150 |      | 30.98549  | 0.02832 | 0.9951 | EXP 150 of 150 |
| 15D00200                    | 3.6 %  | 0.0432318 | 0.0005547 | 0.5589 | EXP 150 of 150 |      | 0.6580   | 0.0312 | 0.0008 | EXP 150 of 150 |      | 0.0174895 | 0.0289577 | 0.0035 | EXP 150 of 150 |      | 3.45402 | 0.02397 | 0.2731 | EXP 150 of 150 |      | 32.55315  | 0.02686 | 0.9951 | EXP 150 of 150 |
| 15D00201                    | 3.8 %  | 0.0422175 | 0.0005076 | 0.5681 | EXP 150 of 150 |      | 0.6846   | 0.0292 | 0.0589 | EXP 149 of 150 |      | 0.0463359 | 0.0279012 | 0.0007 | EXP 150 of 150 |      | 3.12695 | 0.02781 | 0.2899 | EXP 150 of 150 |      | 29.72412  | 0.03051 | 0.9939 | EXP 150 of 150 |
| 15D00202                    | 4.0 %  | 0.0420146 | 0.0005228 | 0.6016 | EXP 150 of 150 |      | 0.7004   | 0.0306 | 0.0144 | EXP 150 of 150 |      | 0.0142757 | 0.0247458 | 0.0074 | EXP 150 of 150 |      | 3.29859 | 0.02291 | 0.2617 | EXP 149 of 150 |      | 31.24513  | 0.03118 | 0.9935 | EXP 150 of 150 |
| 15D00204                    | 4.3 %  | 0.0433182 | 0.0005656 | 0.5752 | EXP 150 of 150 |      | 0.8281   | 0.0279 | 0.0166 | EXP 149 of 150 |      | 0.0945133 | 0.0257505 | 0.0084 | EXP 150 of 150 |      | 4.04362 | 0.02577 | 0.3133 | EXP 150 of 150 |      | 36.57013  | 0.02831 | 0.9934 | EXP 150 of 150 |
| 15D00205                    | 4.6 %  | 0.0405662 | 0.0005059 | 0.6268 | EXP 150 of 150 |      | 0.7612   | 0.0270 | 0.0153 | EXP 149 of 150 |      | 0.0512560 | 0.0254486 | 0.0015 | EXP 150 of 150 |      | 3.72266 | 0.02394 | 0.4121 | EXP 150 of 150 |      | 33.49139  | 0.03281 | 0.9917 | EXP 150 of 150 |
| 15D00206                    | 4.9 %  | 0.0414596 | 0.0004857 | 0.6082 | EXP 150 of 150 |      | 0.7519   | 0.0294 | 0.0226 | EXP 150 of 150 |      | 0.0514312 | 0.0244959 | 0.0019 | EXP 150 of 150 |      | 3.60254 | 0.02663 | 0.2203 | EXP 150 of 150 |      | 33.48736  | 0.03027 | 0.9927 | EXP 150 of 150 |
| 15D00208                    | 5.2 %  | 0.0418319 | 0.0005549 | 0.5367 | EXP 150 of 150 |      | 0.8942   | 0.0252 | 0.0147 | EXP 150 of 150 |      | 0.1185628 | 0.0253250 | 0.0014 | EXP 149 of 150 |      | 4.16552 | 0.02604 | 0.4613 | EXP 149 of 150 |      | 36.03449  | 0.03013 | 0.9919 | EXP 150 of 150 |
| 15D00209                    | 5.5 %  | 0.0395917 | 0.0005176 | 0.5632 | EXP 150 of 150 |      | 0.7257   | 0.0281 | 0.0058 | EXP 150 of 150 |      | 0.0297274 | 0.0260860 | 0.0028 | EXP 150 of 150 |      | 3.44763 | 0.02497 | 0.2961 | EXP 149 of 150 |      | 31.57142  | 0.02895 | 0.9932 | EXP 150 of 150 |
| 15D00210                    | 5.8 %  | 0.0411121 | 0.0005732 | 0.5038 | EXP 150 of 150 |      | 0.7598   | 0.0278 | 0.0106 | EXP 150 of 150 |      | 0.0237517 | 0.0241598 | 0.0065 | EXP 150 of 150 |      | 3.40783 | 0.02340 | 0.2732 | EXP 148 of 150 |      | 31.72315  | 0.03093 | 0.9920 | EXP 150 of 150 |
| 15D00212                    | 6.1 %  | 0.0387126 | 0.0005473 | 0.4976 | EXP 150 of 150 |      | 0.7410   | 0.0281 | 0.0072 | EXP 150 of 150 |      | 0.0142911 | 0.0257854 | 0.0045 | EXP 150 of 150 |      | 3.42669 | 0.02509 | 0.3466 | EXP 150 of 150 |      | 31.48372  | 0.02775 | 0.9933 | EXP 150 of 150 |
| 15D00213                    | 6.5 %  | 0.0391096 | 0.0005208 | 0.5515 | EXP 150 of 150 |      | 0.7785   | 0.0298 | 0.0118 | EXP 150 of 150 |      | 0.0708199 | 0.0271684 | 0.0180 | EXP 150 of 150 |      | 3.15263 | 0.02747 | 0.1895 | EXP 150 of 150 |      | 29.84066  | 0.03070 | 0.9924 | EXP 150 of 150 |
| 15D00214                    | 7.0 %  | 0.0399195 | 0.0005003 | 0.6118 | EXP 150 of 150 |      | 0.9687   | 0.0293 | 0.0349 | EXP 149 of 150 |      | 0.0197124 | 0.0262411 | 0.0057 | EXP 150 of 150 |      | 3.28805 | 0.02487 | 0.2487 | EXP 150 of 150 |      | 30.74974  | 0.03099 | 0.9918 | EXP 150 of 150 |
| 15D00216                    | 7.6 %  | 0.0430052 | 0.0005556 | 0.4984 | EXP 150 of 150 |      | 1.3698   | 0.0280 | 0.1615 | EXP 150 of 150 |      | 0.0349874 | 0.0268233 | 0.0005 | EXP 150 of 150 |      | 3.21666 | 0.02618 | 0.2089 | EXP 150 of 150 |      | 31.00609  | 0.03282 | 0.9903 | EXP 150 of 150 |
| 15D00217                    | 8.4 %  | 0.0417584 | 0.0004435 | 0.5535 | EXP 150 of 150 |      | 2.5037   | 0.0288 | 0.1612 | EXP 150 of 150 |      | 0.0232608 | 0.0260077 | 0.0047 | EXP 150 of 150 |      | 3.23573 | 0.02500 | 0.2027 | EXP 150 of 150 |      | 29.94991  | 0.03038 | 0.9921 | EXP 150 of 150 |
| 15D00218                    | 9.4 %  | 0.0460450 | 0.0004911 | 0.5677 | EXP 149 of 150 |      | 6.5264   | 0.0274 | 0.6894 | EXP 150 of 150 |      | 0.0629104 | 0.0253761 | 0.0078 | EXP 150 of 150 |      | 3.17443 | 0.02703 | 0.1847 | EXP 150 of 150 |      | 28.73053  | 0.03103 | 0.9924 | EXP 150 of 150 |
| 15D00220                    | 10.5 % | 0.0519865 | 0.0005868 | 0.4352 | EXP 150 of 150 |      | 13.3146  | 0.0308 | 0.8502 | EXP 149 of 150 |      | 0.0102098 | 0.0274011 | 0.0038 | EXP 150 of 150 |      | 2.84662 | 0.02431 | 0.1320 | EXP 149 of 150 |      | 25.53837  | 0.02999 | 0.9929 | EXP 150 of 150 |
| 15D00221                    | 11.7 % | 0.0687767 | 0.0006223 | 0.1448 | EXP 150 of 150 |      | 28.3266  | 0.0332 | 0.9595 | EXP 150 of 150 |      | 0.0085014 | 0.0281074 | 0.0045 | EXP 150 of 150 |      | 2.74434 | 0.02738 | 0.2063 | EXP 150 of 150 |      | 22.33673  | 0.02515 | 0.9957 | EXP 150 of 150 |
| 15D00222                    | 13.1 % | 0.0984071 | 0.0007340 | 0.1443 | EXP 149 of 150 |      | 58.6424  | 0.0380 | 0.9870 | EXP 150 of 150 |      | 0.0335656 | 0.0243603 | 0.0096 | EXP 150 of 150 |      | 2.69887 | 0.02627 | 0.1761 | EXP 150 of 150 |      | 20.87928  | 0.03097 | 0.9941 | EXP 150 of 150 |
| 15D00224                    | 14.7 % | 0.1262235 | 0.0007798 | 0.0007 | EXP 150 of 150 |      | 86.0129  | 0.0347 | 0.9950 | EXP 150 of 150 |      | 0.0480117 | 0.0260752 | 0.0283 | EXP 150 of 150 |      | 2.21762 | 0.02649 | 0.1185 | EXP 150 of 150 |      | 19.05040  | 0.02755 | 0.9956 | EXP 150 of 150 |
| 15D00225                    | 16.5 % | 0.1752828 | 0.0010315 | 0.1543 | EXP 150 of 150 |      | 132.0258 | 0.0386 | 0.9973 | EXP 150 of 150 |      | 0.0320418 | 0.0247311 | 0.0174 | EXP 150 of 150 |      | 2.09206 | 0.02428 | 0.0745 | EXP 149 of 150 |      | 2         |         |        |                |



15D00180.full.xls printed at 06-07-2015 (15:03)  
ArArCALC v2.6.2 -- Beta Version

| Sample Parameters |        | Sample    | Material   | Location          | Analyst         | Temp | Standard Name    | Standard (in Ma) | %1σ   | Standard Reference  | Standard 40Ar/39Ar | %1σ   | J          | %1σ   | Air 40Ar/36Ar | %1σ   | MDF (lin)   | %1σ   | Volume Ratio | Sensitivity (mol/volt) | Day | Month | Year | Hour | Min | Resist | Irradiation | X-pos | Y-pos | Z/H-pos |
|-------------------|--------|-----------|------------|-------------------|-----------------|------|------------------|------------------|-------|---------------------|--------------------|-------|------------|-------|---------------|-------|-------------|-------|--------------|------------------------|-----|-------|------|------|-----|--------|-------------|-------|-------|---------|
| 15D00181          | 1.9 %  | 1180010-2 | Groundmass | Kerguelen Plateau | Anthony Koppers | 1.9  | FCT-NM (6C14-14) | 28.201           | 0.082 | Kuiper et al (2008) | 9.01382            | 0.258 | 0.00174370 | 0.258 | 303.304       | 0.156 | 0.993559196 | 0.070 | 1            | 4.8E-14                | 2   | JAN   | 2015 | 22   | 32  | 1      | 14-OSU-06   | 0.00  | 0.00  | 46.86   |
| 15D00182          | 2.0 %  | 1180010-2 | Groundmass | Kerguelen Plateau | Anthony Koppers | 2    | FCT-NM (6C14-14) | 28.201           | 0.082 | Kuiper et al (2008) | 9.01382            | 0.258 | 0.00174370 | 0.258 | 303.304       | 0.156 | 0.993559196 | 0.070 | 1            | 4.8E-14                | 2   | JAN   | 2015 | 22   | 44  | 1      | 14-OSU-06   | 0.00  | 0.00  | 46.86   |
| 15D00184          | 2.1 %  | 1180010-2 | Groundmass | Kerguelen Plateau | Anthony Koppers | 2.1  | FCT-NM (6C14-14) | 28.201           | 0.082 | Kuiper et al (2008) | 9.01382            | 0.258 | 0.00174370 | 0.258 | 303.304       | 0.156 | 0.993559196 | 0.070 | 1            | 4.8E-14                | 2   | JAN   | 2015 | 23   | 9   | 1      | 14-OSU-06   | 0.00  | 0.00  | 46.86   |
| 15D00185          | 2.2 %  | 1180010-2 | Groundmass | Kerguelen Plateau | Anthony Koppers | 2.2  | FCT-NM (6C14-14) | 28.201           | 0.082 | Kuiper et al (2008) | 9.01382            | 0.258 | 0.00174370 | 0.258 | 303.304       | 0.156 | 0.993559196 | 0.070 | 1            | 4.8E-14                | 2   | JAN   | 2015 | 23   | 22  | 1      | 14-OSU-06   | 0.00  | 0.00  | 46.86   |
| 15D00186          | 2.3 %  | 1180010-2 | Groundmass | Kerguelen Plateau | Anthony Koppers | 2.3  | FCT-NM (6C14-14) | 28.201           | 0.082 | Kuiper et al (2008) | 9.01382            | 0.258 | 0.00174370 | 0.258 | 303.304       | 0.156 | 0.993559196 | 0.070 | 1            | 4.8E-14                | 2   | JAN   | 2015 | 23   | 34  | 1      | 14-OSU-06   | 0.00  | 0.00  | 46.86   |
| 15D00188          | 2.4 %  | 1180010-2 | Groundmass | Kerguelen Plateau | Anthony Koppers | 2.4  | FCT-NM (6C14-14) | 28.201           | 0.082 | Kuiper et al (2008) | 9.01382            | 0.258 | 0.00174370 | 0.258 | 303.304       | 0.156 | 0.993559196 | 0.070 | 1            | 4.8E-14                | 2   | JAN   | 2015 | 23   | 59  | 1      | 14-OSU-06   | 0.00  | 0.00  | 46.86   |
| 15D00189          | 2.5 %  | 1180010-2 | Groundmass | Kerguelen Plateau | Anthony Koppers | 2.5  | FCT-NM (6C14-14) | 28.201           | 0.082 | Kuiper et al (2008) | 9.01382            | 0.258 | 0.00174370 | 0.258 | 303.304       | 0.156 | 0.993559196 | 0.070 | 1            | 4.8E-14                | 3   | JAN   | 2015 | 0    | 11  | 1      | 14-OSU-06   | 0.00  | 0.00  | 46.86   |
| 15D00190          | 2.6 %  | 1180010-2 | Groundmass | Kerguelen Plateau | Anthony Koppers | 2.6  | FCT-NM (6C14-14) | 28.201           | 0.082 | Kuiper et al (2008) | 9.01382            | 0.258 | 0.00174370 | 0.258 | 303.304       | 0.156 | 0.993559196 | 0.070 | 1            | 4.8E-14                | 3   | JAN   | 2015 | 0    | 24  | 1      | 14-OSU-06   | 0.00  | 0.00  | 46.86   |
| 15D00192          | 2.7 %  | 1180010-2 | Groundmass | Kerguelen Plateau | Anthony Koppers | 2.7  | FCT-NM (6C14-14) | 28.201           | 0.082 | Kuiper et al (2008) | 9.01382            | 0.258 | 0.00174370 | 0.258 | 303.304       | 0.156 | 0.993559196 | 0.070 | 1            | 4.8E-14                | 3   | JAN   | 2015 | 0    | 48  | 1      | 14-OSU-06   | 0.00  | 0.00  | 46.86   |
| 15D00193          | 2.8 %  | 1180010-2 | Groundmass | Kerguelen Plateau | Anthony Koppers | 2.8  | FCT-NM (6C14-14) | 28.201           | 0.082 | Kuiper et al (2008) | 9.01382            | 0.258 | 0.00174370 | 0.258 | 303.304       | 0.156 | 0.993559196 | 0.070 | 1            | 4.8E-14                | 3   | JAN   | 2015 | 1    | 1   | 1      | 14-OSU-06   | 0.00  | 0.00  | 46.86   |
| 15D00194          | 2.9 %  | 1180010-2 | Groundmass | Kerguelen Plateau | Anthony Koppers | 2.9  | FCT-NM (6C14-14) | 28.201           | 0.082 | Kuiper et al (2008) | 9.01382            | 0.258 | 0.00174370 | 0.258 | 303.304       | 0.156 | 0.993559196 | 0.070 | 1            | 4.8E-14                | 3   | JAN   | 2015 | 1    | 13  | 1      | 14-OSU-06   | 0.00  | 0.00  | 46.86   |
| 15D00196          | 3.0 %  | 1180010-2 | Groundmass | Kerguelen Plateau | Anthony Koppers | 3    | FCT-NM (6C14-14) | 28.201           | 0.082 | Kuiper et al (2008) | 9.01382            | 0.258 | 0.00174370 | 0.258 | 303.304       | 0.156 | 0.993559196 | 0.070 | 1            | 4.8E-14                | 3   | JAN   | 2015 | 1    | 38  | 1      | 14-OSU-06   | 0.00  | 0.00  | 46.86   |
| 15D00197          | 3.2 %  | 1180010-2 | Groundmass | Kerguelen Plateau | Anthony Koppers | 3.2  | FCT-NM (6C14-14) | 28.201           | 0.082 | Kuiper et al (2008) | 9.01382            | 0.258 | 0.00174370 | 0.258 | 303.304       | 0.156 | 0.993559196 | 0.070 | 1            | 4.8E-14                | 3   | JAN   | 2015 | 1    | 51  | 1      | 14-OSU-06   | 0.00  | 0.00  | 46.86   |
| 15D00198          | 3.4 %  | 1180010-2 | Groundmass | Kerguelen Plateau | Anthony Koppers | 3.4  | FCT-NM (6C14-14) | 28.201           | 0.082 | Kuiper et al (2008) | 9.01382            | 0.258 | 0.00174370 | 0.258 | 303.304       | 0.156 | 0.993559196 | 0.070 | 1            | 4.8E-14                | 3   | JAN   | 2015 | 2    | 3   | 1      | 14-OSU-06   | 0.00  | 0.00  | 46.86   |
| 15D00200          | 3.6 %  | 1180010-2 | Groundmass | Kerguelen Plateau | Anthony Koppers | 3.6  | FCT-NM (6C14-14) | 28.201           | 0.082 | Kuiper et al (2008) | 9.01382            | 0.258 | 0.00174370 | 0.258 | 303.304       | 0.156 | 0.993559196 | 0.070 | 1            | 4.8E-14                | 3   | JAN   | 2015 | 2    | 28  | 1      | 14-OSU-06   | 0.00  | 0.00  | 46.86   |
| 15D00201          | 3.8 %  | 1180010-2 | Groundmass | Kerguelen Plateau | Anthony Koppers | 3.8  | FCT-NM (6C14-14) | 28.201           | 0.082 | Kuiper et al (2008) | 9.01382            | 0.258 | 0.00174370 | 0.258 | 303.304       | 0.156 | 0.993559196 | 0.070 | 1            | 4.8E-14                | 3   | JAN   | 2015 | 2    | 40  | 1      | 14-OSU-06   | 0.00  | 0.00  | 46.86   |
| 15D00202          | 4.0 %  | 1180010-2 | Groundmass | Kerguelen Plateau | Anthony Koppers | 4    | FCT-NM (6C14-14) | 28.201           | 0.082 | Kuiper et al (2008) | 9.01382            | 0.258 | 0.00174370 | 0.258 | 303.304       | 0.156 | 0.993559196 | 0.070 | 1            | 4.8E-14                | 3   | JAN   | 2015 | 2    | 53  | 1      | 14-OSU-06   | 0.00  | 0.00  | 46.86   |
| 15D00204          | 4.3 %  | 1180010-2 | Groundmass | Kerguelen Plateau | Anthony Koppers | 4.3  | FCT-NM (6C14-14) | 28.201           | 0.082 | Kuiper et al (2008) | 9.01382            | 0.258 | 0.00174370 | 0.258 | 303.304       | 0.156 | 0.993559196 | 0.070 | 1            | 4.8E-14                | 3   | JAN   | 2015 | 3    | 18  | 1      | 14-OSU-06   | 0.00  | 0.00  | 46.86   |
| 15D00205          | 4.6 %  | 1180010-2 | Groundmass | Kerguelen Plateau | Anthony Koppers | 4.6  | FCT-NM (6C14-14) | 28.201           | 0.082 | Kuiper et al (2008) | 9.01382            | 0.258 | 0.00174370 | 0.258 | 303.304       | 0.156 | 0.993559196 | 0.070 | 1            | 4.8E-14                | 3   | JAN   | 2015 | 3    | 30  | 1      | 14-OSU-06   | 0.00  | 0.00  | 46.86   |
| 15D00206          | 4.9 %  | 1180010-2 | Groundmass | Kerguelen Plateau | Anthony Koppers | 4.9  | FCT-NM (6C14-14) | 28.201           | 0.082 | Kuiper et al (2008) | 9.01382            | 0.258 | 0.00174370 | 0.258 | 303.304       | 0.156 | 0.993559196 | 0.070 | 1            | 4.8E-14                | 3   | JAN   | 2015 | 3    | 42  | 1      | 14-OSU-06   | 0.00  | 0.00  | 46.86   |
| 15D00208          | 5.2 %  | 1180010-2 | Groundmass | Kerguelen Plateau | Anthony Koppers | 5.2  | FCT-NM (6C14-14) | 28.201           | 0.082 | Kuiper et al (2008) | 9.01382            | 0.258 | 0.00174370 | 0.258 | 303.304       | 0.156 | 0.993559196 | 0.070 | 1            | 4.8E-14                | 3   | JAN   | 2015 | 4    | 7   | 1      | 14-OSU-06   | 0.00  | 0.00  | 46.86   |
| 15D00209          | 5.5 %  | 1180010-2 | Groundmass | Kerguelen Plateau | Anthony Koppers | 5.5  | FCT-NM (6C14-14) | 28.201           | 0.082 | Kuiper et al (2008) | 9.01382            | 0.258 | 0.00174370 | 0.258 | 303.304       | 0.156 | 0.993559196 | 0.070 | 1            | 4.8E-14                | 3   | JAN   | 2015 | 4    | 20  | 1      | 14-OSU-06   | 0.00  | 0.00  | 46.86   |
| 15D00210          | 5.8 %  | 1180010-2 | Groundmass | Kerguelen Plateau | Anthony Koppers | 5.8  | FCT-NM (6C14-14) | 28.201           | 0.082 | Kuiper et al (2008) | 9.01382            | 0.258 | 0.00174370 | 0.258 | 303.304       | 0.156 | 0.993559196 | 0.070 | 1            | 4.8E-14                | 3   | JAN   | 2015 | 4    | 32  | 1      | 14-OSU-06   | 0.00  | 0.00  | 46.86   |
| 15D00212          | 6.1 %  | 1180010-2 | Groundmass | Kerguelen Plateau | Anthony Koppers | 6.1  | FCT-NM (6C14-14) | 28.201           | 0.082 | Kuiper et al (2008) | 9.01382            | 0.258 | 0.00174370 | 0.258 | 303.304       | 0.156 | 0.993559196 | 0.070 | 1            | 4.8E-14                | 3   | JAN   | 2015 | 4    | 57  | 1      | 14-OSU-06   | 0.00  | 0.00  | 46.86   |
| 15D00213          | 6.5 %  | 1180010-2 | Groundmass | Kerguelen Plateau | Anthony Koppers | 6.5  | FCT-NM (6C14-14) | 28.201           | 0.082 | Kuiper et al (2008) | 9.01382            | 0.258 | 0.00174370 | 0.258 | 303.304       | 0.156 | 0.993559196 | 0.070 | 1            | 4.8E-14                | 3   | JAN   | 2015 | 5    | 9   | 1      | 14-OSU-06   | 0.00  | 0.00  | 46.86   |
| 15D00214          | 7.0 %  | 1180010-2 | Groundmass | Kerguelen Plateau | Anthony Koppers | 7    | FCT-NM (6C14-14) | 28.201           | 0.082 | Kuiper et al (2008) | 9.01382            | 0.258 | 0.00174370 | 0.258 | 303.304       | 0.156 | 0.993559196 | 0.070 | 1            | 4.8E-14                | 3   | JAN   | 2015 | 5    | 22  | 1      | 14-OSU-06   | 0.00  | 0.00  | 46.86   |
| 15D00216          | 7.6 %  | 1180010-2 | Groundmass | Kerguelen Plateau | Anthony Koppers | 7.6  | FCT-NM (6C14-14) | 28.201           | 0.082 | Kuiper et al (2008) | 9.01382            | 0.258 | 0.00174370 | 0.258 | 303.304       | 0.156 | 0.993559196 | 0.070 | 1            | 4.8E-14                | 3   | JAN   | 2015 | 5    | 47  | 1      | 14-OSU-06   | 0.00  | 0.00  | 46.86   |
| 15D00217          | 8.4 %  | 1180010-2 | Groundmass | Kerguelen Plateau | Anthony Koppers | 8.4  | FCT-NM (6C14-14) | 28.201           | 0.082 | Kuiper et al (2008) | 9.01382            | 0.258 | 0.00174370 | 0.258 | 303.304       | 0.156 | 0.993559196 | 0.070 | 1            | 4.8E-14                | 3   | JAN   | 2015 | 5    | 59  | 1      | 14-OSU-06   | 0.00  | 0.00  | 46.86   |
| 15D00218          | 9.4 %  | 1180010-2 | Groundmass | Kerguelen Plateau | Anthony Koppers | 9.4  | FCT-NM (6C14-14) | 28.201           | 0.082 | Kuiper et al (2008) | 9.01382            | 0.258 | 0.00174370 | 0.258 | 303.304       | 0.156 | 0.993559196 | 0.070 | 1            | 4.8E-14                | 3   | JAN   | 2015 | 6    | 12  | 1      | 14-OSU-06   | 0.00  | 0.00  | 46.86   |
| 15D00220          | 10.5 % | 1180010-2 | Groundmass | Kerguelen Plateau | Anthony Koppers | 10.5 | FCT-NM (6C14-14) | 28.201           | 0.082 | Kuiper et al (2008) | 9.01382            | 0.258 | 0.00174370 | 0.258 | 303.304       | 0.156 | 0.993559196 | 0.070 | 1            | 4.8E-14                | 3   | JAN   | 2015 | 6    | 36  | 1      | 14-OSU-06   | 0.00  | 0.00  | 46.86   |
| 15D00221          | 11.7 % | 1180010-2 | Groundmass | Kerguelen Plateau | Anthony Koppers | 11.7 | FCT-NM (6C14-14) | 28.201           | 0.082 | Kuiper et al (2008) | 9.01382            | 0.258 | 0.00174370 | 0.258 | 303.304       | 0.156 | 0.993559196 | 0.070 | 1            | 4.8E-14                | 3   | JAN   | 2015 | 6    | 49  | 1      | 14-OSU-06   | 0.00  | 0.00  | 46.86   |
| 15D00222          | 13.1 % | 1180010-2 | Groundmass | Kerguelen Plateau | Anthony Koppers | 13.1 | FCT-NM (6C14-14) | 28.201           | 0.082 | Kuiper et al (2008) | 9.01382            | 0.258 | 0.00174370 | 0.258 | 303.304       | 0.156 | 0.993559196 | 0.070 | 1            | 4.8E-14                | 3   | JAN   | 2015 | 7    | 1   | 1      | 14-OSU-06   | 0.00  | 0.00  | 46.86   |
| 15D00224          | 14.7 % | 1180010-2 | Groundmass | Kerguelen Plateau | Anthony Koppers | 14.7 | FCT-NM (6C14-14) | 28.201           | 0.082 | Kuiper et al (2008) | 9.01382            | 0.258 | 0.00174370 | 0.258 | 303.304       | 0.156 | 0.993559196 | 0.070 | 1            | 4.8E-14                | 3   | JAN   | 2015 | 7    | 26  | 1      | 14-OSU-06   | 0.00  | 0.00  | 46.86   |
| 15D00225          | 16.5 % | 1180010-2 | Groundmass | Kerguelen Plateau | Anthony Koppers | 16.5 | FCT-NM (6C14-14) | 28.201           | 0.082 | Kuiper et al (2008) | 9.01382            | 0.258 | 0.00174370 | 0.258 | 303.304       | 0.156 | 0.993559196 | 0.070 | 1            | 4.8E-14                | 3   | JAN   | 2015 | 7    | 39  | 1      | 14-OSU-06   | 0.00  | 0.00  | 46.86   |
| 15D00226          | 18.3 % | 1180010-2 | Groundmass | Kerguelen Plateau | Anthony Koppers | 18.3 | FCT-NM (6C14-14) | 28.201           | 0.082 | Kuiper et al (2008) | 9.01382            | 0.258 | 0.00174370 | 0.258 | 303.304       | 0.156 | 0.993559196 | 0.070 | 1            | 4.8E-14                | 3   | JAN   | 2015 | 7    | 51  | 1      | 14-OSU-06   | 0.00  | 0.00  | 46.86   |
| 15D00228          | 20.2 % | 1180010-2 | Groundmass | Kerguelen Plateau | Anthony Koppers | 20.2 | FCT-NM (6C14-14) | 28.201           | 0.082 | Kuiper et al (2008) | 9.01382            | 0.258 | 0.00174370 | 0.258 | 303.304       | 0.156 | 0.993559196 | 0.070 | 1            | 4.8E-14                | 3   | JAN   | 2015 | 8    | 16  | 1      | 14-OSU-06   | 0.00  | 0.00  | 46.86   |
| 15D00229          | 22.2 % | 1180010-2 | Groundmass | Kerguelen Plateau | Anthony Koppers | 22.2 | FCT-NM (6C14-14) | 28.201           | 0.082 | Kuiper et al (2008) | 9.01382            | 0.258 | 0.00174370 | 0.258 | 303.304       | 0.156 | 0.993559196 | 0.070 | 1            | 4.8E-14                | 3   | JAN   | 2015 | 8    | 28  | 1      | 14-OSU-06   | 0.00  | 0.00  | 46.86   |
| 15D00231          | 24.5 % | 1180010-2 | Groundmass | Kerguelen Plateau | Anthony Koppers | 24.5 | FCT-NM (6C14-14) | 28.201           | 0.082 | Kuiper et al (2008) | 9.01382            | 0.258 | 0.00174370 | 0.258 | 303.304       | 0.156 | 0.993559196 | 0.070 | 1            | 4.8E-14                | 3   | JAN   | 2015 | 8    | 53  | 1      | 14-OSU-06   | 0.00  | 0.00  | 46.86   |



[illegible]



| Irradiation<br>Constants | 40/36(a) |       | %1σ | 40/36(c) |    | %1σ    | 38/36(a) |       | %1σ | 38/36(c) |   | %1σ       | 39/37(ca) |          | %1σ | 38/37(ca) |   | %1σ     | 36/37(ca) |   | %1σ | 40/39(k) |   | %1σ | 38/39(k) |   | %1σ | 36/38(cl) |   | %1σ | K/Ca | %1σ | K/Cl | %1σ | Ca/Cl | %1σ |
|--------------------------|----------|-------|-----|----------|----|--------|----------|-------|-----|----------|---|-----------|-----------|----------|-----|-----------|---|---------|-----------|---|-----|----------|---|-----|----------|---|-----|-----------|---|-----|------|-----|------|-----|-------|-----|
|                          |          |       |     |          |    |        |          |       |     |          |   |           |           |          |     |           |   |         |           |   |     |          |   |     |          |   |     |           |   |     |      |     |      |     |       |     |
| 15D00181                 | 1.9 %    | 295.5 | 0   | 0.018    | 35 | 0.1869 | 0        | 1.493 | 3   | 0.000673 | 0 | 0.0000139 | 0         | 0.000264 | 0   | 0.00101   | 0 | 0.01138 | 0         | 0 | 0   | 0.43     | 0 | 0   | 0        | 0 | 0   | 0         | 0 | 0   | 0    | 0   | 0    | 0   | 0     | 0   |
| 15D00182                 | 2.0 %    | 295.5 | 0   | 0.018    | 35 | 0.1869 | 0        | 1.493 | 3   | 0.000673 | 0 | 0.0000139 | 0         | 0.000264 | 0   | 0.00101   | 0 | 0.01138 | 0         | 0 | 0   | 0.43     | 0 | 0   | 0        | 0 | 0   | 0         | 0 | 0   | 0    | 0   | 0    | 0   | 0     | 0   |
| 15D00184                 | 2.1 %    | 295.5 | 0   | 0.018    | 35 | 0.1869 | 0        | 1.493 | 3   | 0.000673 | 0 | 0.0000139 | 0         | 0.000264 | 0   | 0.00101   | 0 | 0.01138 | 0         | 0 | 0   | 0.43     | 0 | 0   | 0        | 0 | 0   | 0         | 0 | 0   | 0    | 0   | 0    | 0   | 0     | 0   |
| 15D00185                 | 2.2 %    | 295.5 | 0   | 0.018    | 35 | 0.1869 | 0        | 1.493 | 3   | 0.000673 | 0 | 0.0000139 | 0         | 0.000264 | 0   | 0.00101   | 0 | 0.01138 | 0         | 0 | 0   | 0.43     | 0 | 0   | 0        | 0 | 0   | 0         | 0 | 0   | 0    | 0   | 0    | 0   | 0     | 0   |
| 15D00186                 | 2.3 %    | 295.5 | 0   | 0.018    | 35 | 0.1869 | 0        | 1.493 | 3   | 0.000673 | 0 | 0.0000139 | 0         | 0.000264 | 0   | 0.00101   | 0 | 0.01138 | 0         | 0 | 0   | 0.43     | 0 | 0   | 0        | 0 | 0   | 0         | 0 | 0   | 0    | 0   | 0    | 0   | 0     | 0   |
| 15D00188                 | 2.4 %    | 295.5 | 0   | 0.018    | 35 | 0.1869 | 0        | 1.493 | 3   | 0.000673 | 0 | 0.0000139 | 0         | 0.000264 | 0   | 0.00101   | 0 | 0.01138 | 0         | 0 | 0   | 0.43     | 0 | 0   | 0        | 0 | 0   | 0         | 0 | 0   | 0    | 0   | 0    | 0   | 0     | 0   |
| 15D00189                 | 2.5 %    | 295.5 | 0   | 0.018    | 35 | 0.1869 | 0        | 1.493 | 3   | 0.000673 | 0 | 0.0000139 | 0         | 0.000264 | 0   | 0.00101   | 0 | 0.01138 | 0         | 0 | 0   | 0.43     | 0 | 0   | 0        | 0 | 0   | 0         | 0 | 0   | 0    | 0   | 0    | 0   | 0     | 0   |
| 15D00190                 | 2.6 %    | 295.5 | 0   | 0.018    | 35 | 0.1869 | 0        | 1.493 | 3   | 0.000673 | 0 | 0.0000139 | 0         | 0.000264 | 0   | 0.00101   | 0 | 0.01138 | 0         | 0 | 0   | 0.43     | 0 | 0   | 0        | 0 | 0   | 0         | 0 | 0   | 0    | 0   | 0    | 0   | 0     | 0   |
| 15D00192                 | 2.7 %    | 295.5 | 0   | 0.018    | 35 | 0.1869 | 0        | 1.493 | 3   | 0.000673 | 0 | 0.0000139 | 0         | 0.000264 | 0   | 0.00101   | 0 | 0.01138 | 0         | 0 | 0   | 0.43     | 0 | 0   | 0        | 0 | 0   | 0         | 0 | 0   | 0    | 0   | 0    | 0   | 0     | 0   |
| 15D00193                 | 2.8 %    | 295.5 | 0   | 0.018    | 35 | 0.1869 | 0        | 1.493 | 3   | 0.000673 | 0 | 0.0000139 | 0         | 0.000264 | 0   | 0.00101   | 0 | 0.01138 | 0         | 0 | 0   | 0.43     | 0 | 0   | 0        | 0 | 0   | 0         | 0 | 0   | 0    | 0   | 0    | 0   | 0     | 0   |
| 15D00194                 | 2.9 %    | 295.5 | 0   | 0.018    | 35 | 0.1869 | 0        | 1.493 | 3   | 0.000673 | 0 | 0.0000139 | 0         | 0.000264 | 0   | 0.00101   | 0 | 0.01138 | 0         | 0 | 0   | 0.43     | 0 | 0   | 0        | 0 | 0   | 0         | 0 | 0   | 0    | 0   | 0    | 0   | 0     | 0   |
| 15D00196                 | 3.0 %    | 295.5 | 0   | 0.018    | 35 | 0.1869 | 0        | 1.493 | 3   | 0.000673 | 0 | 0.0000139 | 0         | 0.000264 | 0   | 0.00101   | 0 | 0.01138 | 0         | 0 | 0   | 0.43     | 0 | 0   | 0        | 0 | 0   | 0         | 0 | 0   | 0    | 0   | 0    | 0   | 0     | 0   |
| 15D00197                 | 3.2 %    | 295.5 | 0   | 0.018    | 35 | 0.1869 | 0        | 1.493 | 3   | 0.000673 | 0 | 0.0000139 | 0         | 0.000264 | 0   | 0.00101   | 0 | 0.01138 | 0         | 0 | 0   | 0.43     | 0 | 0   | 0        | 0 | 0   | 0         | 0 | 0   | 0    | 0   | 0    | 0   | 0     | 0   |
| 15D00198                 | 3.4 %    | 295.5 | 0   | 0.018    | 35 | 0.1869 | 0        | 1.493 | 3   | 0.000673 | 0 | 0.0000139 | 0         | 0.000264 | 0   | 0.00101   | 0 | 0.01138 | 0         | 0 | 0   | 0.43     | 0 | 0   | 0        | 0 | 0   | 0         | 0 | 0   | 0    | 0   | 0    | 0   | 0     | 0   |
| 15D00200                 | 3.6 %    | 295.5 | 0   | 0.018    | 35 | 0.1869 | 0        | 1.493 | 3   | 0.000673 | 0 | 0.0000139 | 0         | 0.000264 | 0   | 0.00101   | 0 | 0.01138 | 0         | 0 | 0   | 0.43     | 0 | 0   | 0        | 0 | 0   | 0         | 0 | 0   | 0    | 0   | 0    | 0   | 0     | 0   |
| 15D00201                 | 3.8 %    | 295.5 | 0   | 0.018    | 35 | 0.1869 | 0        | 1.493 | 3   | 0.000673 | 0 | 0.0000139 | 0         | 0.000264 | 0   | 0.00101   | 0 | 0.01138 | 0         | 0 | 0   | 0.43     | 0 | 0   | 0        | 0 | 0   | 0         | 0 | 0   | 0    | 0   | 0    | 0   | 0     | 0   |
| 15D00202                 | 4.0 %    | 295.5 | 0   | 0.018    | 35 | 0.1869 | 0        | 1.493 | 3   | 0.000673 | 0 | 0.0000139 | 0         | 0.000264 | 0   | 0.00101   | 0 | 0.01138 | 0         | 0 | 0   | 0.43     | 0 | 0   | 0        | 0 | 0   | 0         | 0 | 0   | 0    | 0   | 0    | 0   | 0     | 0   |
| 15D00204                 | 4.3 %    | 295.5 | 0   | 0.018    | 35 | 0.1869 | 0        | 1.493 | 3   | 0.000673 | 0 | 0.0000139 | 0         | 0.000264 | 0   | 0.00101   | 0 | 0.01138 | 0         | 0 | 0   | 0.43     | 0 | 0   | 0        | 0 | 0   | 0         | 0 | 0   | 0    | 0   | 0    | 0   | 0     | 0   |
| 15D00205                 | 4.6 %    | 295.5 | 0   | 0.018    | 35 | 0.1869 | 0        | 1.493 | 3   | 0.000673 | 0 | 0.0000139 | 0         | 0.000264 | 0   | 0.00101   | 0 | 0.01138 | 0         | 0 | 0   | 0.43     | 0 | 0   | 0        | 0 | 0   | 0         | 0 | 0   | 0    | 0   | 0    | 0   | 0     | 0   |
| 15D00206                 | 4.9 %    | 295.5 | 0   | 0.018    | 35 | 0.1869 | 0        | 1.493 | 3   | 0.000673 | 0 | 0.0000139 | 0         | 0.000264 | 0   | 0.00101   | 0 | 0.01138 | 0         | 0 | 0   | 0.43     | 0 | 0   | 0        | 0 | 0   | 0         | 0 | 0   | 0    | 0   | 0    | 0   | 0     | 0   |
| 15D00208                 | 5.2 %    | 295.5 | 0   | 0.018    | 35 | 0.1869 | 0        | 1.493 | 3   | 0.000673 | 0 | 0.0000139 | 0         | 0.000264 | 0   | 0.00101   | 0 | 0.01138 | 0         | 0 | 0   | 0.43     | 0 | 0   | 0        | 0 | 0   | 0         | 0 | 0   | 0    | 0   | 0    | 0   | 0     | 0   |
| 15D00209                 | 5.5 %    | 295.5 | 0   | 0.018    | 35 | 0.1869 | 0        | 1.493 | 3   | 0.000673 | 0 | 0.0000139 | 0         | 0.000264 | 0   | 0.00101   | 0 | 0.01138 | 0         | 0 | 0   | 0.43     | 0 | 0   | 0        | 0 | 0   | 0         | 0 | 0   | 0    | 0   | 0    | 0   | 0     | 0   |
| 15D00210                 | 5.8 %    | 295.5 | 0   | 0.018    | 35 | 0.1869 | 0        | 1.493 | 3   | 0.000673 | 0 | 0.0000139 | 0         | 0.000264 | 0   | 0.00101   | 0 | 0.01138 | 0         | 0 | 0   | 0.43     | 0 | 0   | 0        | 0 | 0   | 0         | 0 | 0   | 0    | 0   | 0    | 0   | 0     | 0   |
| 15D00212                 | 6.1 %    | 295.5 | 0   | 0.018    | 35 | 0.1869 | 0        | 1.493 | 3   | 0.000673 | 0 | 0.0000139 | 0         | 0.000264 | 0   | 0.00101   | 0 | 0.01138 | 0         | 0 | 0   | 0.43     | 0 | 0   | 0        | 0 | 0   | 0         | 0 | 0   | 0    | 0   | 0    | 0   | 0     | 0   |
| 15D00213                 | 6.5 %    | 295.5 | 0   | 0.018    | 35 | 0.1869 | 0        | 1.493 | 3   | 0.000673 | 0 | 0.0000139 | 0         | 0.000264 | 0   | 0.00101   | 0 | 0.01138 | 0         | 0 | 0   | 0.43     | 0 | 0   | 0        | 0 | 0   | 0         | 0 | 0   | 0    | 0   | 0    | 0   | 0     | 0   |
| 15D00214                 | 7.0 %    | 295.5 | 0   | 0.018    | 35 | 0.1869 | 0        | 1.493 | 3   | 0.000673 | 0 | 0.0000139 | 0         | 0.000264 | 0   | 0.00101   | 0 | 0.01138 | 0         | 0 | 0   | 0.43     | 0 | 0   | 0        | 0 | 0   | 0         | 0 | 0   | 0    | 0   | 0    | 0   | 0     | 0   |
| 15D00216                 | 7.6 %    | 295.5 | 0   | 0.018    | 35 | 0.1869 | 0        | 1.493 | 3   | 0.000673 | 0 | 0.0000139 | 0         | 0.000264 | 0   | 0.00101   | 0 | 0.01138 | 0         | 0 | 0   | 0.43     | 0 | 0   | 0        | 0 | 0   | 0         | 0 | 0   | 0    | 0   | 0    | 0   | 0     | 0   |
| 15D00217                 | 8.4 %    | 295.5 | 0   | 0.018    | 35 | 0.1869 | 0        | 1.493 | 3   | 0.000673 | 0 | 0.0000139 | 0         | 0.000264 | 0   | 0.00101   | 0 | 0.01138 | 0         | 0 | 0   | 0.43     | 0 | 0   | 0        | 0 | 0   | 0         | 0 | 0   | 0    | 0   | 0    | 0   | 0     | 0   |
| 15D00218                 | 9.4 %    | 295.5 | 0   | 0.018    | 35 | 0.1869 | 0        | 1.493 | 3   | 0.000673 | 0 | 0.0000139 | 0         | 0.000264 | 0   | 0.00101   | 0 | 0.01138 | 0         | 0 | 0   | 0.43     | 0 | 0   | 0        | 0 | 0   | 0         | 0 | 0   | 0    | 0   | 0    | 0   | 0     | 0   |
| 15D00220                 | 10.5 %   | 295.5 | 0   | 0.018    | 35 | 0.1869 | 0        | 1.493 | 3   | 0.000673 | 0 | 0.0000139 | 0         | 0.000264 | 0   | 0.00101   | 0 | 0.01138 | 0         | 0 | 0   | 0.43     | 0 | 0   | 0        | 0 | 0   | 0         | 0 | 0   | 0    | 0   | 0    | 0   | 0     | 0   |
| 15D00221                 | 11.7 %   | 295.5 | 0   | 0.018    | 35 | 0.1869 | 0        | 1.493 | 3   | 0.000673 | 0 | 0.0000139 | 0         | 0.000264 | 0   | 0.00101   | 0 | 0.01138 | 0         | 0 | 0   | 0.43     | 0 | 0   | 0        | 0 | 0   | 0         | 0 | 0   | 0    | 0   | 0    | 0   | 0     | 0   |
| 15D00222                 | 13.1 %   | 295.5 | 0   | 0.018    | 35 | 0.1869 | 0        | 1.493 | 3   | 0.000673 | 0 | 0.0000139 | 0         | 0.000264 | 0   | 0.00101   | 0 | 0.01138 | 0         | 0 | 0   | 0.43     | 0 | 0   | 0        | 0 | 0   | 0         | 0 | 0   | 0    | 0   | 0    | 0   | 0     | 0   |
| 15D00224                 | 14.7 %   | 295.5 | 0   | 0.018    | 35 | 0.1869 | 0        | 1.493 | 3   | 0.000673 | 0 | 0.0000139 | 0         | 0.000264 | 0   | 0.00101   | 0 | 0.01138 | 0         | 0 | 0   | 0.43     | 0 | 0   | 0        | 0 | 0   | 0         | 0 | 0   | 0    | 0   | 0    | 0   | 0     | 0   |
| 15D00225                 | 16.5 %   | 295.5 | 0   | 0.018    | 35 | 0.1869 | 0        | 1.493 | 3   | 0.000673 | 0 | 0.0000139 | 0         | 0.000264 | 0   | 0.00101   | 0 | 0.01138 | 0         | 0 | 0   | 0.43     | 0 | 0   | 0        | 0 | 0   | 0         | 0 | 0   | 0    | 0   | 0    | 0   | 0     | 0   |
| 15D00226                 | 18.3 %   | 295.5 | 0   | 0.018    | 35 | 0.1869 | 0        | 1.493 | 3   | 0.000673 | 0 | 0.0000139 | 0         | 0.000264 | 0   | 0.00101   | 0 | 0.01138 | 0         | 0 | 0   | 0.43     | 0 | 0   | 0        | 0 | 0   | 0         | 0 | 0   | 0    | 0   | 0    | 0   | 0     | 0   |
| 15D00228                 | 20.2 %   | 295.5 | 0   | 0.018    | 35 | 0.1869 | 0        | 1.493 | 3   | 0.000673 | 0 | 0.0000139 | 0         | 0.000264 | 0   | 0.00101   | 0 | 0.01138 | 0         | 0 | 0   | 0.43     | 0 | 0   | 0        | 0 | 0   | 0         | 0 | 0   | 0    | 0   | 0    | 0   | 0     | 0   |
| 15D00229                 | 22.2 %   | 295.5 | 0   | 0.018    | 35 | 0.1869 | 0        | 1.493 | 3   | 0.000673 | 0 | 0.0000139 | 0         | 0.000264 | 0   | 0.00101   | 0 | 0.01138 | 0         | 0 | 0   | 0.43     | 0 | 0   | 0        | 0 | 0   | 0         | 0 | 0   | 0    | 0   | 0    | 0   | 0     | 0   |
| 15D00231                 | 24.5 %   | 295.5 | 0   | 0.018    | 35 | 0.1869 | 0        | 1.493 | 3   | 0.000673 | 0 | 0.0000139 | 0         | 0.000264 | 0   | 0.00101   | 0 | 0.01138 | 0         | 0 | 0   | 0.43     | 0 | 0   | 0        | 0 | 0   | 0         | 0 | 0   | 0    | 0   | 0    | 0   | 0     | 0   |



15D00180.AGE >>> 1180010-2 >>> KERGUELEN | FALLOON (14-PIL-01) PROJECT

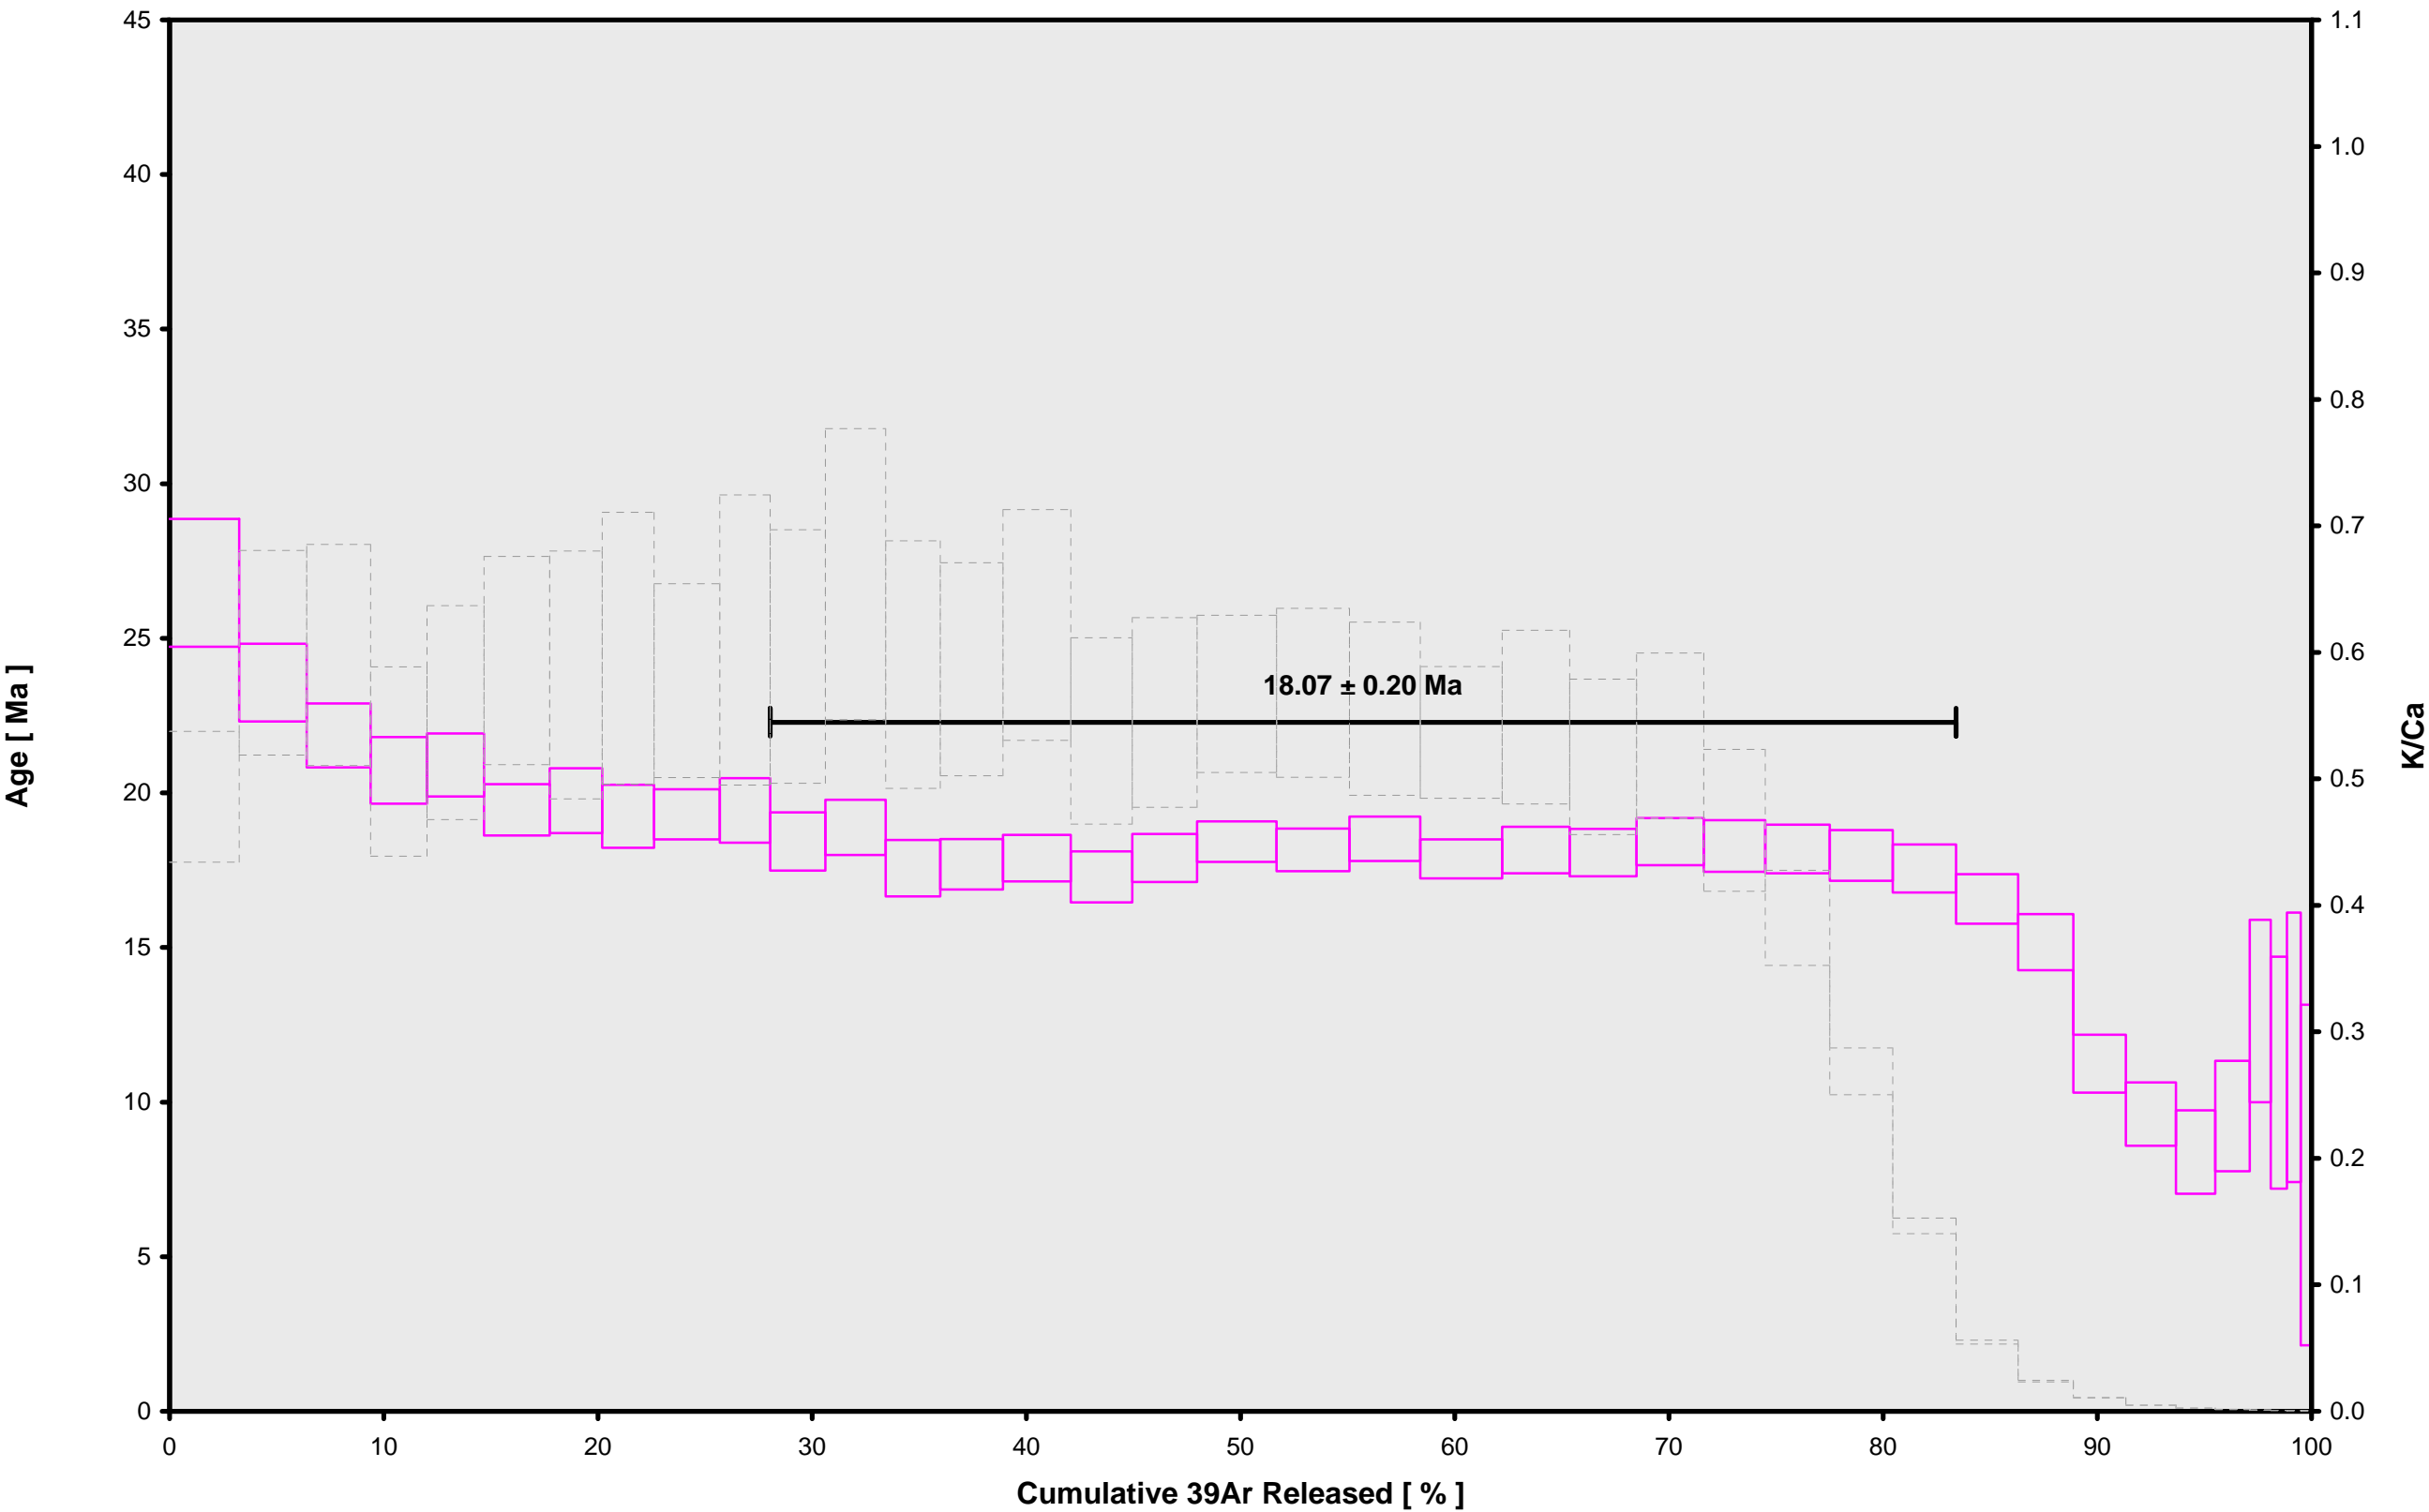

Ar-Ages in Ma

WEIGHTED PLATEAU

18.07 ± 0.20

TOTAL FUSION

17.98 ± 0.19

NORMAL ISOCHRON

17.49 ± 0.93

INVERSE ISOCHRON

17.53 ± 0.87

MSWD (PROBABILITY)

0.96 (50%)

Sample Info

Groundmass

Kerguelen Plateau

Anthony Koppers

IRR = 14-OSU-06 (6C14-14)

J = 0.00174370 ± 0.00000450



15D00180.AGE >>> 1180010-2 >>> KERGUELEN | FALLOON (14-PIL-01) PROJECT

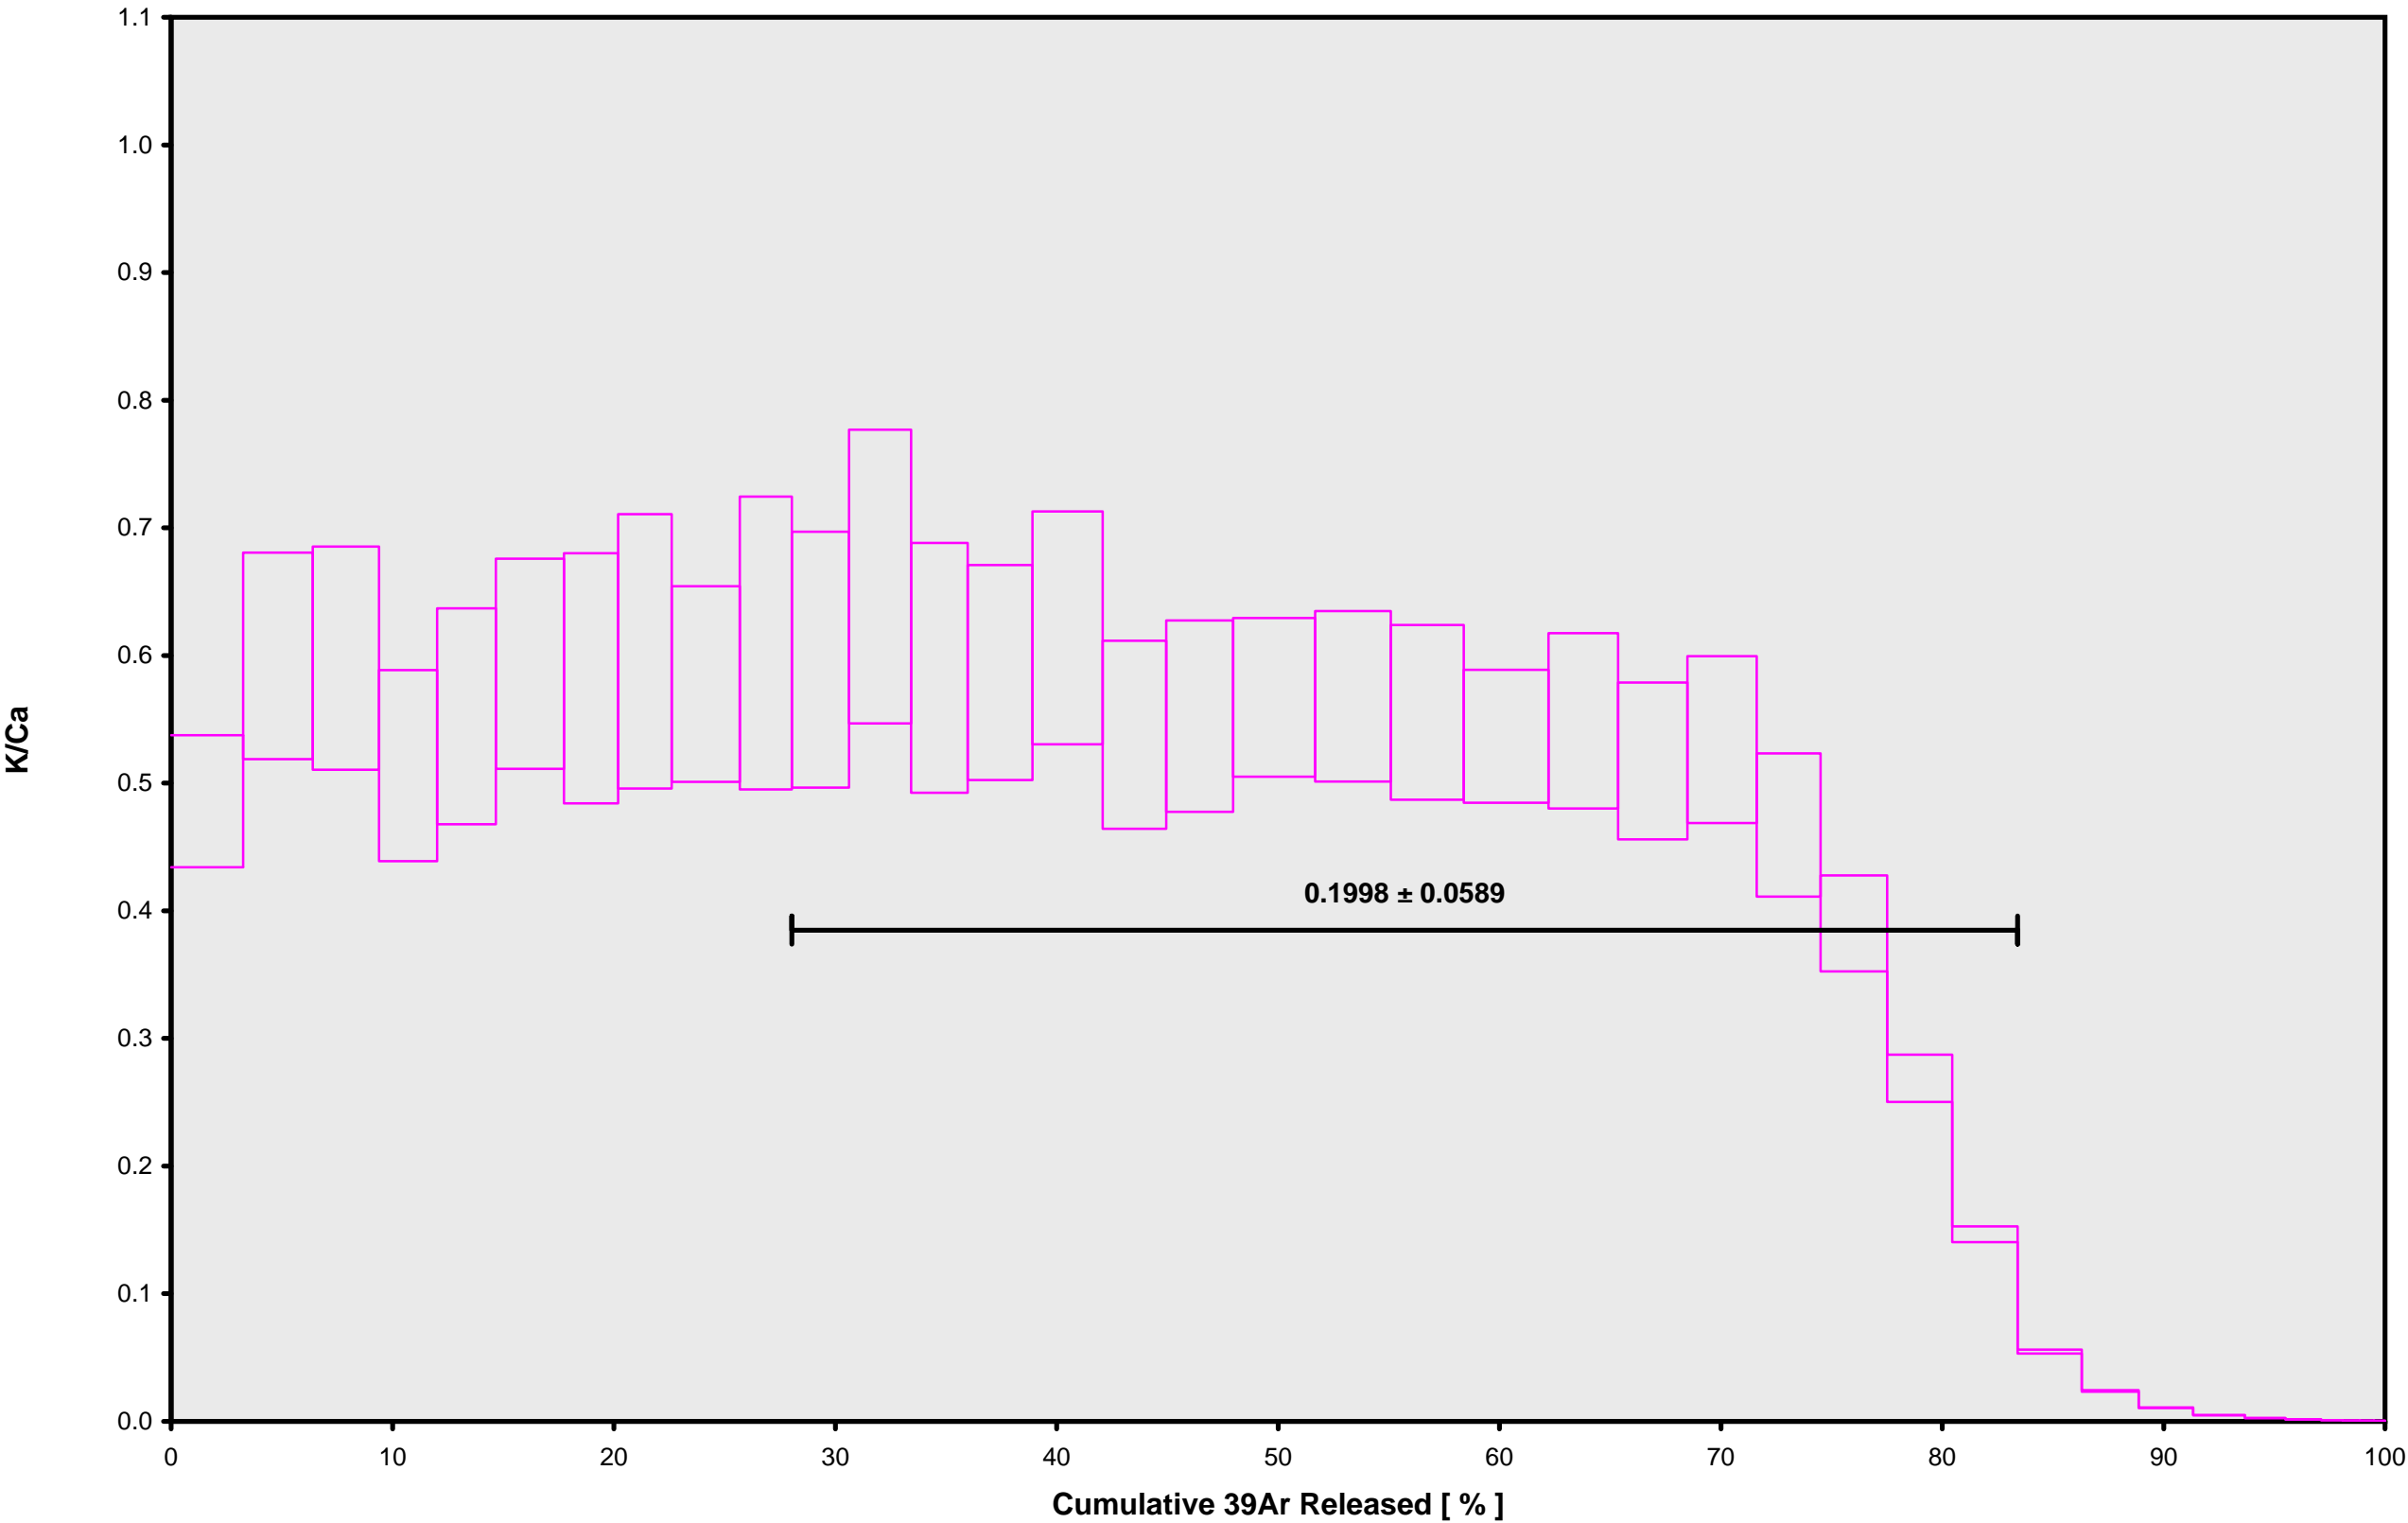

**Ar-Ages in Ma**

**WEIGHTED PLATEAU**

**$18.07 \pm 0.20$**

**TOTAL FUSION**

**$17.98 \pm 0.19$**

**NORMAL ISOCHRON**

**$17.49 \pm 0.93$**

**INVERSE ISOCHRON**

**$17.53 \pm 0.87$**

**Sample Info**

**Groundmass**

**Kerguelen Plateau**

**Anthony Koppers**

**IRR = 14-OSU-06 (6C14-14)**

**$J = 0.00174370 \pm 0.00000450$**



15D00180.AGE >>> 1180010-2 >>> KERGUELEN | FALLOON (14-PIL-01) PROJECT

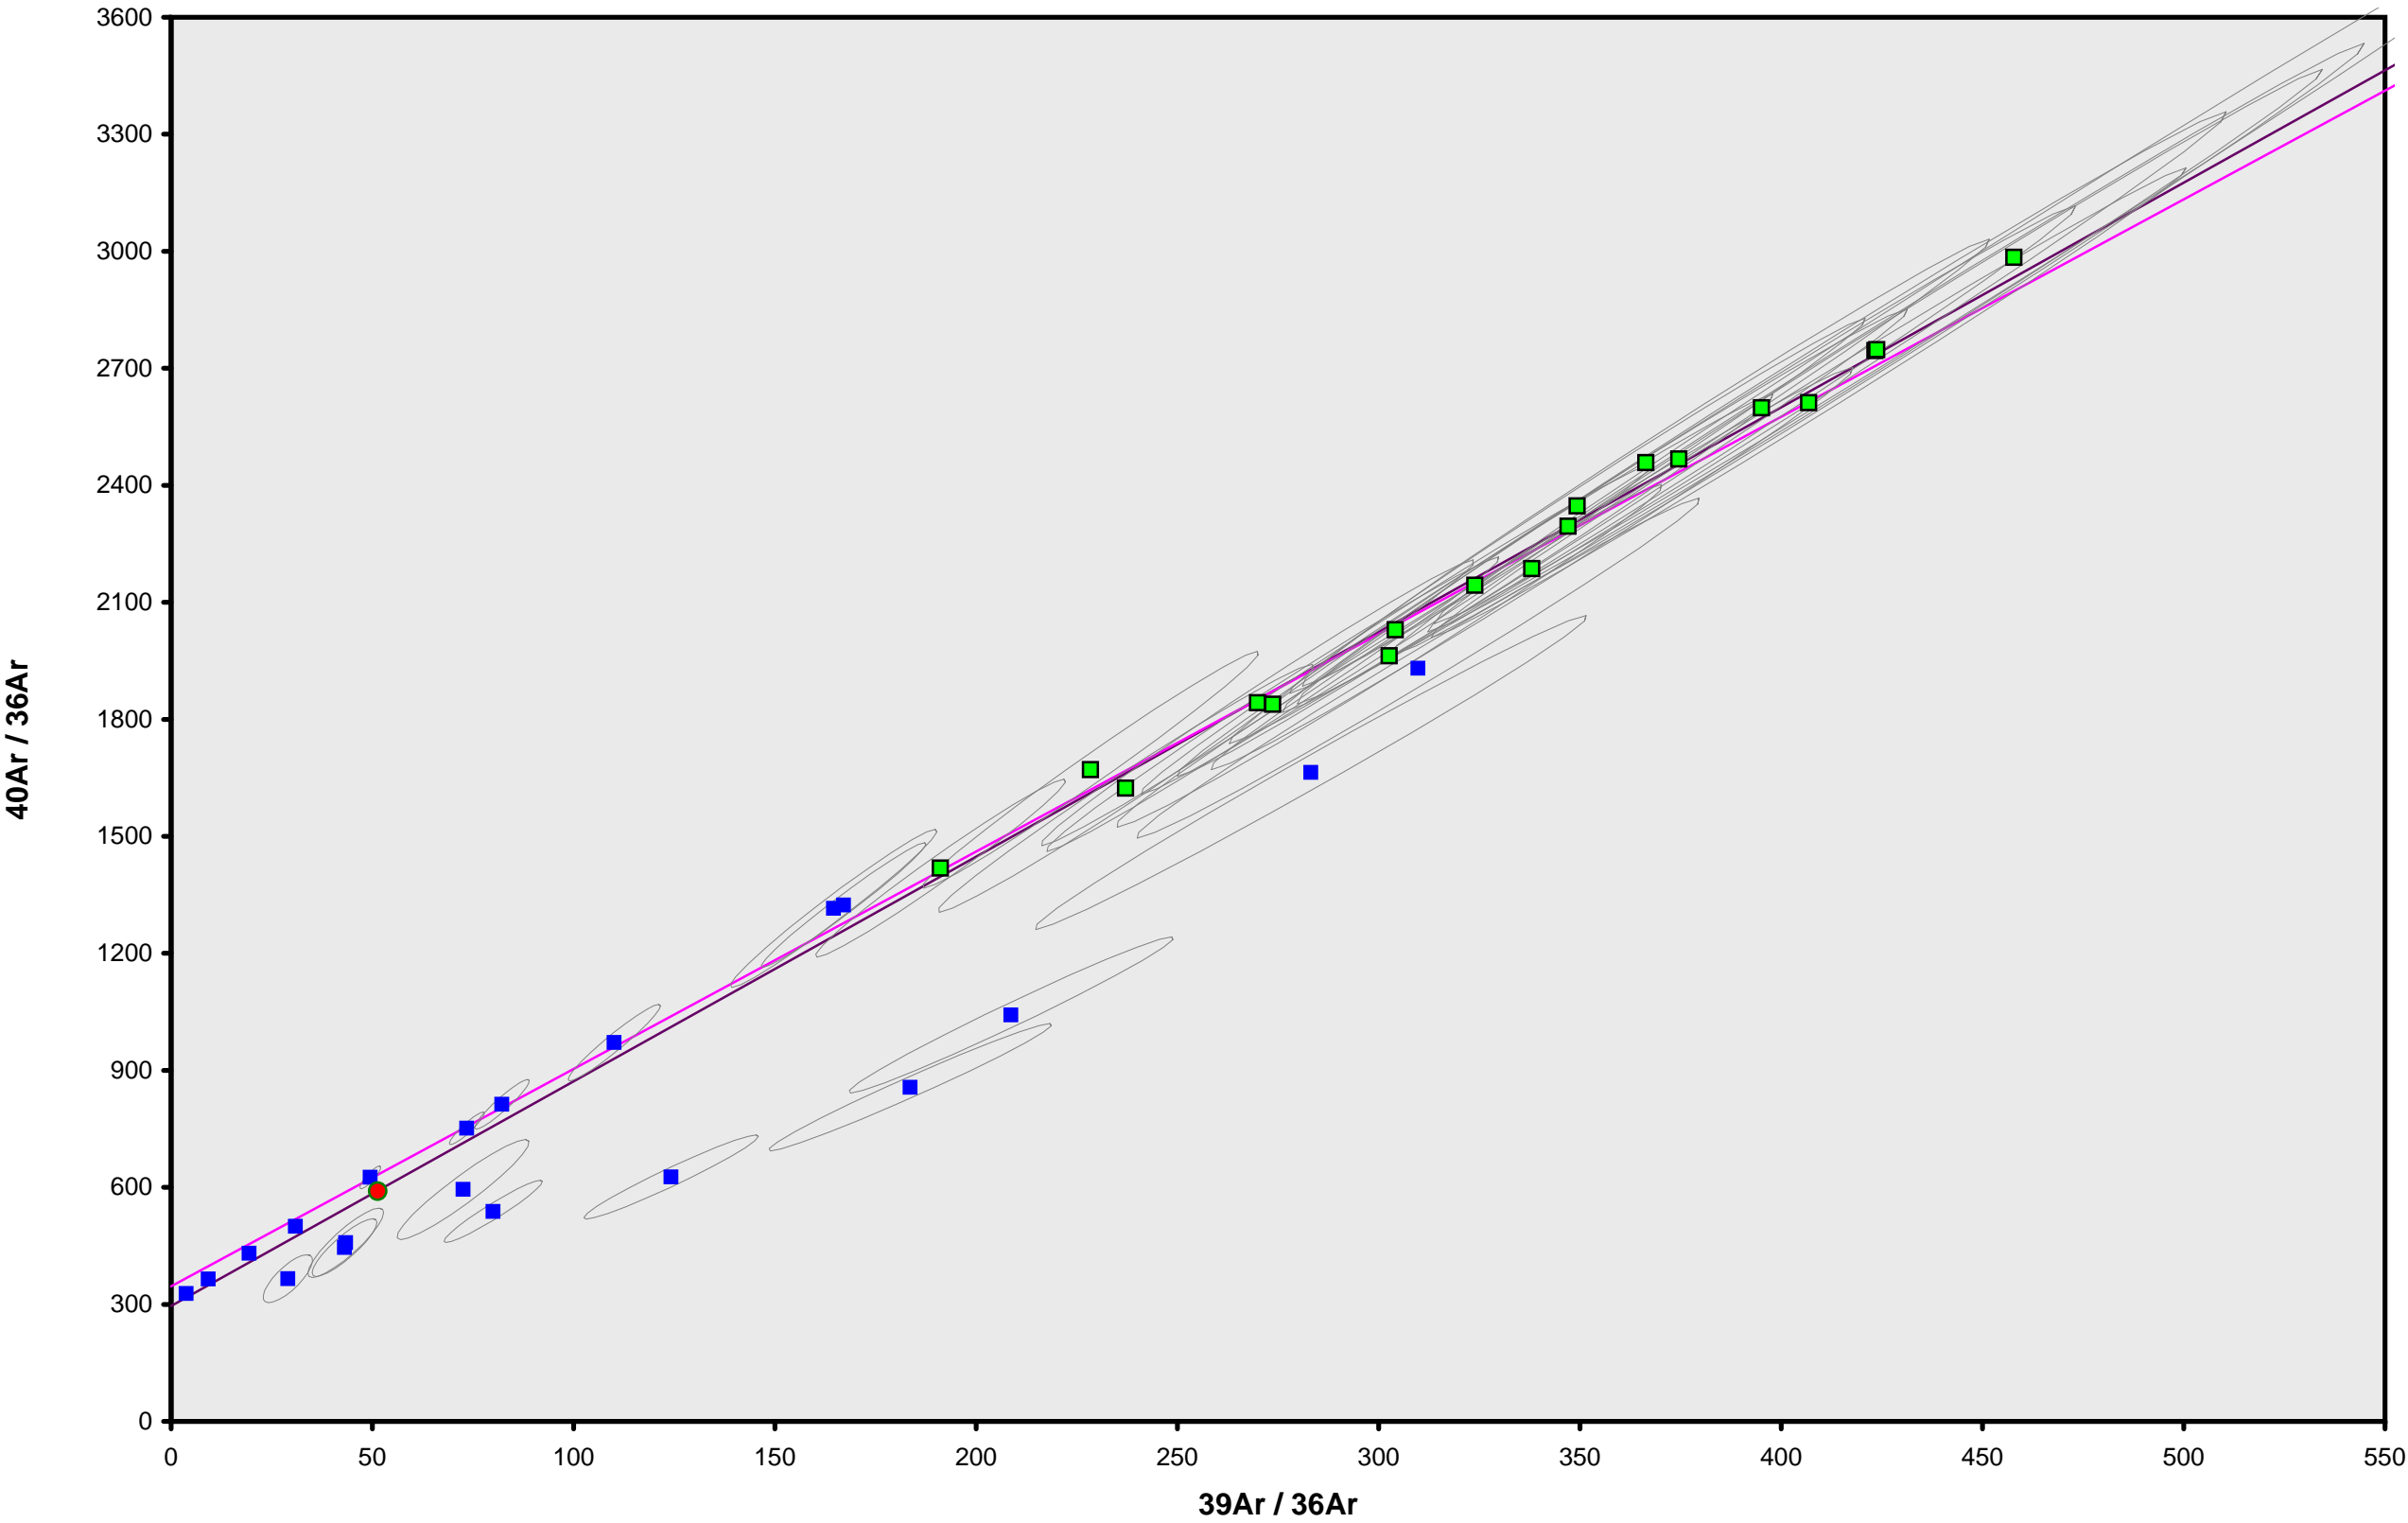

Ar-Ages in Ma

WEIGHTED PLATEAU

$18.07 \pm 0.20$

TOTAL FUSION

$17.98 \pm 0.19$

NORMAL ISOCHRON

$17.49 \pm 0.93$

INVERSE ISOCHRON

$17.53 \pm 0.87$

MSWD (PROBABILITY)

0.94 (52%)

40AR/36AR INTERCEPT

$346.6 \pm 93.2$

Sample Info

Groundmass

Kerguelen Plateau

Anthony Koppers

IRR = 14-OSU-06 (6C14-14)

J =  $0.00174370 \pm 0.00000450$



15D00180.AGE >>> 1180010-2 >>> KERGUELEN | FALLOON (14-PIL-01) PROJECT

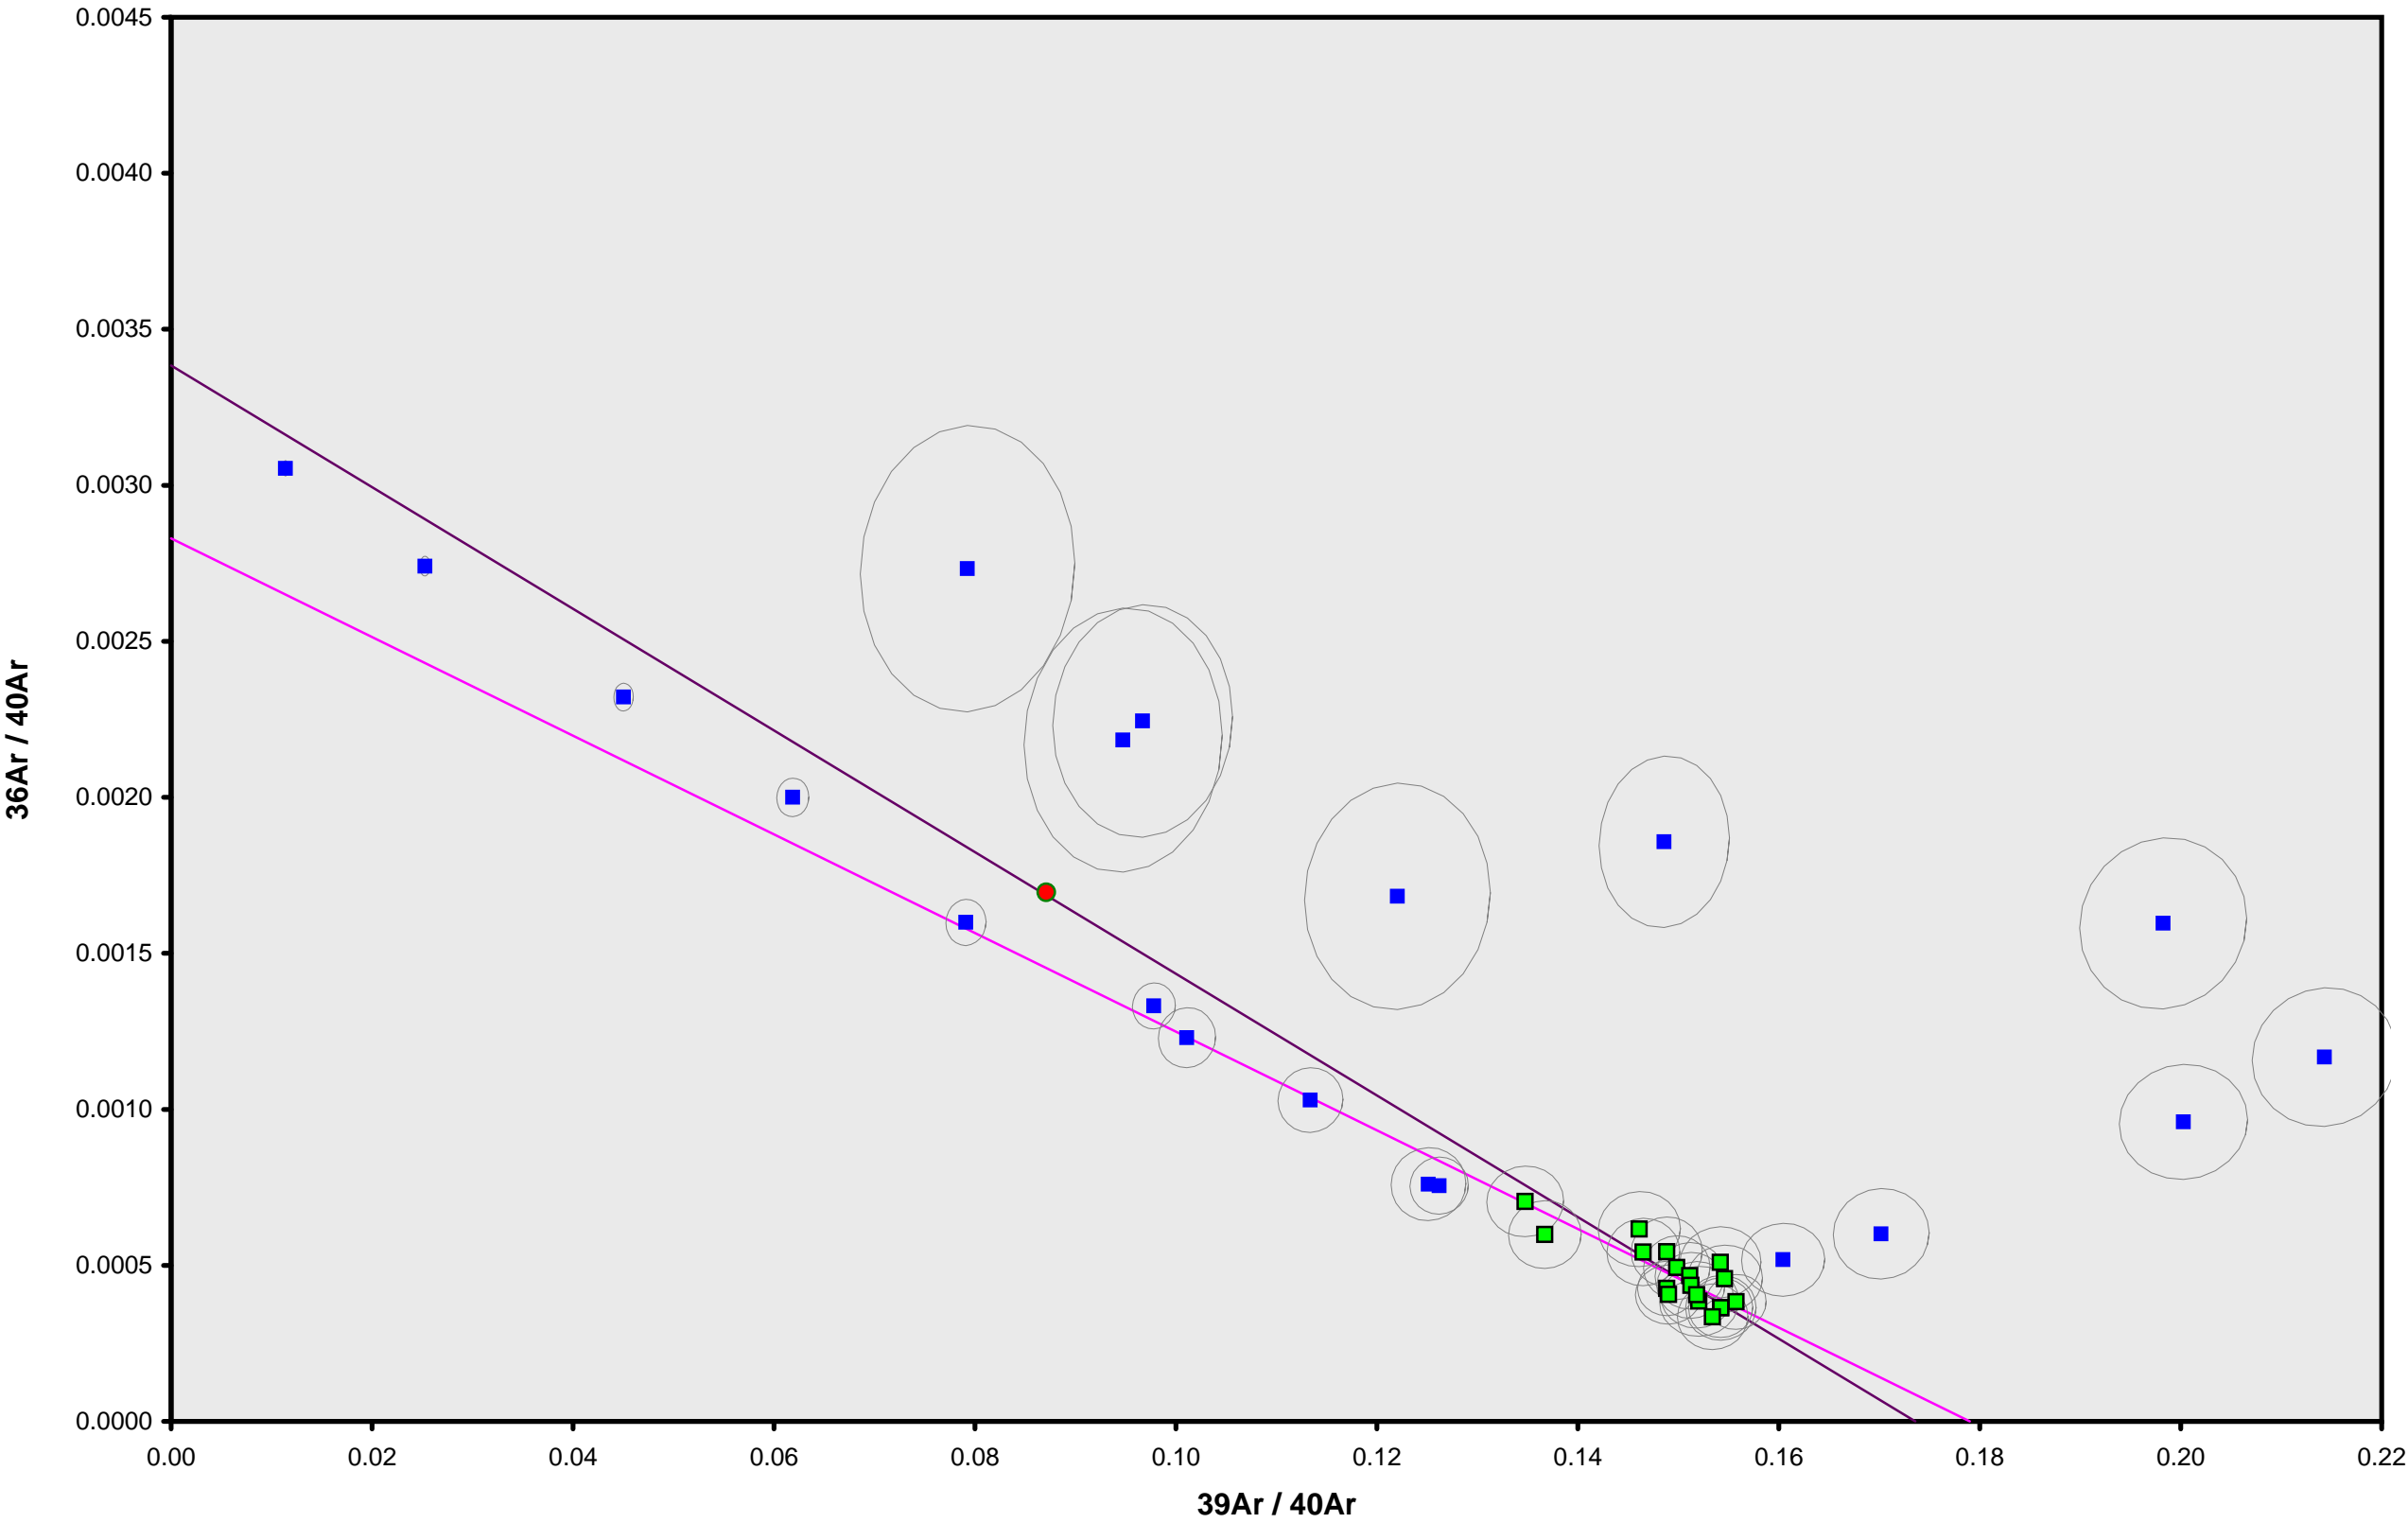

### Ar-Ages in Ma

#### WEIGHTED PLATEAU

$18.07 \pm 0.20$

#### TOTAL FUSION

$17.98 \pm 0.19$

#### NORMAL ISOCHRON

$17.49 \pm 0.93$

#### INVERSE ISOCHRON

$17.53 \pm 0.87$

#### MSWD (PROBABILITY)

0.91 (55%)

#### SPREADING FACTOR

11.7%

#### 40AR/36AR INTERCEPT

$353.4 \pm 97.3$

### Sample Info

#### Groundmass

Kerguelen Plateau

Anthony Koppers

IRR = 14-OSU-06 (6C14-14)

J =  $0.00174370 \pm 0.00000450$



| Incremental Heating |         |   | 36Ar(a)<br>[V] | 37Ar(ca)<br>[V] | 38Ar(cl)<br>[V] | 39Ar(k)<br>[V] | 40Ar(r)<br>[V] | Age ± 2σ<br>(Ka) | 40Ar(r)<br>(%) | 39Ar(k)<br>(%) | K/Ca ± 2σ     |
|---------------------|---------|---|----------------|-----------------|-----------------|----------------|----------------|------------------|----------------|----------------|---------------|
| 13C2177             | 500 °C  | ✓ | 0.0087735      | 0.0180725       | 0.0021657       | 0.0461195      | 0.0086757      | 498.5 ± 1003.5   | 0.34           | 4.43           | 1.097 ± 0.088 |
| 13C2179             | 600 °C  | ✓ | 0.0055332      | 0.0600283       | 0.0038054       | 0.1335685      | 0.0089845      | 178.2 ± 507.6    | 0.55           | 12.83          | 0.957 ± 0.050 |
| 13C2180             | 700 °C  | ✓ | 0.0054681      | 0.1008202       | 0.0034725       | 0.1958145      | 0.0016953      | 22.9 ± 343.5     | 0.10           | 18.81          | 0.835 ± 0.041 |
| 13C2182             | 800 °C  | ✓ | 0.0045968      | 0.1001111       | 0.0020747       | 0.1800455      | 0.0023851      | 35.1 ± 385.9     | 0.18           | 17.30          | 0.773 ± 0.038 |
| 13C2183             | 900 °C  | ✓ | 0.0022638      | 0.0439960       | 0.0006675       | 0.0739739      | 0.0191502      | 685.7 ± 933.3    | 2.78           | 7.11           | 0.723 ± 0.039 |
| 13C2185             | 1025 °C | ✓ | 0.0026216      | 0.0578931       | 0.0005653       | 0.0700765      | 0.0192337      | 727.0 ± 1013.2   | 2.42           | 6.73           | 0.520 ± 0.027 |
| 13C2186             | 1225 °C | ✓ | 0.0132631      | 0.2944274       | 0.0025485       | 0.2323773      | 0.0007029      | 8.0 ± 303.9      | 0.02           | 22.33          | 0.339 ± 0.017 |
| 13C2188             | 1400 °C | ✓ | 0.0053939      | 0.1644573       | 0.0010138       | 0.1088189      | 0.0046188      | 112.5 ± 783.7    | 0.29           | 10.46          | 0.285 ± 0.014 |

|  |   |  |           |           |           |           |           |  |  |  |  |
|--|---|--|-----------|-----------|-----------|-----------|-----------|--|--|--|--|
|  | Σ |  | 0.0479141 | 0.8398059 | 0.0163135 | 1.0407947 | 0.0388573 |  |  |  |  |
|--|---|--|-----------|-----------|-----------|-----------|-----------|--|--|--|--|

| Information on Analysis                                                                                                                                                                                                                          | Results          | 40(r)/39(k) ± 2σ               | Age ± 2σ<br>(Ka)            | MSWD        | 39Ar(k)<br>(%,n)    | K/Ca ± 2σ     |
|--------------------------------------------------------------------------------------------------------------------------------------------------------------------------------------------------------------------------------------------------|------------------|--------------------------------|-----------------------------|-------------|---------------------|---------------|
| Sample = 1180256-2<br>Material = Groundmass<br>Location = Kerguelen Plateau<br>Analyst = Kyle Krawl<br>Project = KERGUELEN<br>Mass Discrimination Law = LIN<br>Irradiation = OSU2C13<br>J = 0.00146860 ± 0.00000405<br>FCT-3 = 28.201 ± 0.023 Ma | Age Plateau      |                                |                             |             |                     |               |
|                                                                                                                                                                                                                                                  | Recalibrated     | 0.02206 ± 0.06414<br>± 290.67% | 58.5 ± 169.9<br>± 290.67%   | 0.77<br>62% | 100.00<br>8         | 0.431 ± 0.158 |
|                                                                                                                                                                                                                                                  |                  |                                | Full External Error ± 169.9 | 2.07        | 2σ Confidence Limit |               |
|                                                                                                                                                                                                                                                  |                  |                                | Analytical Error ± 169.9    | 1.0000      | Error Magnification |               |
|                                                                                                                                                                                                                                                  | Total Fusion Age |                                |                             |             |                     |               |
|                                                                                                                                                                                                                                                  | Recalibrated     | 0.03733 ± 0.07085<br>± 189.77% | 98.9 ± 187.7<br>± 189.76%   |             | 8                   | 0.533 ± 0.012 |
|                                                                                                                                                                                                                                                  |                  |                                | Full External Error ± 187.7 |             |                     |               |
|                                                                                                                                                                                                                                                  |                  |                                | Analytical Error ± 187.7    |             |                     |               |



| Normal Isochron |         |   | 39(k)/36(a) ± 2σ | 40(a+r)/36(a) ± 2σ | r.i.   |
|-----------------|---------|---|------------------|--------------------|--------|
| 13C2177         | 500 °C  | ✓ | 5.26 ± 0.04      | 294.51 ± 1.98      | 0.9661 |
| 13C2179         | 600 °C  | ✓ | 24.14 ± 0.24     | 297.12 ± 4.63      | 0.5200 |
| 13C2180         | 700 °C  | ✓ | 35.81 ± 0.33     | 295.81 ± 4.65      | 0.5284 |
| 13C2182         | 800 °C  | ✓ | 39.17 ± 0.46     | 296.02 ± 5.71      | 0.5872 |
| 13C2183         | 900 °C  | ✓ | 32.68 ± 0.76     | 303.96 ± 11.63     | 0.5918 |
| 13C2185         | 1025 °C | ✓ | 26.73 ± 0.59     | 302.84 ± 10.32     | 0.6104 |
| 13C2186         | 1225 °C | ✓ | 17.52 ± 0.08     | 295.55 ± 2.01      | 0.5428 |
| 13C2188         | 1400 °C | ✓ | 20.17 ± 0.32     | 294.64 ± 5.96      | 0.7314 |

| Results                                                 | 40(a)/36(a) ± 2σ                                                    | 40(r)/39(k) ± 2σ               | Age ± 2σ (Ka)                                          | MSWD                                   |
|---------------------------------------------------------|---------------------------------------------------------------------|--------------------------------|--------------------------------------------------------|----------------------------------------|
| Normal Isochron<br>Recalibrated                         | 294.20 ± 2.25<br>± 0.76%                                            | 0.07899 ± 0.11817<br>± 149.60% | 209.3 ± 313.0<br>± 149.59%                             | 0.66<br>68%                            |
| Full External Error ± 313.1<br>Analytical Error ± 313.0 |                                                                     |                                |                                                        |                                        |
| Statistics                                              | 2σ Confidence Limit<br>Error Magnification<br>Number of Data Points | 2.15<br>1.0000<br>8            | Convergence<br>Number of Iterations<br>Calculated Line | 0.000000000137<br>4<br>Weighted York-2 |



| Inverse Isochron |         |   | 39(k)/40(a+r) ± 2σ    | 36(a)/40(a+r) ± 2σ      | r.i.   |
|------------------|---------|---|-----------------------|-------------------------|--------|
| 13C2177          | 500 °C  | ✓ | 0.0178488 ± 0.0000316 | 0.00339546 ± 0.00002287 | 0.0661 |
| 13C2179          | 600 °C  | ✓ | 0.0812432 ± 0.0010902 | 0.00336560 ± 0.00005248 | 0.7844 |
| 13C2180          | 700 °C  | ✓ | 0.1210593 ± 0.0016187 | 0.00338055 ± 0.00005308 | 0.8057 |
| 13C2182          | 800 °C  | ✓ | 0.1323158 ± 0.0020659 | 0.00337816 ± 0.00006515 | 0.7979 |
| 13C2183          | 900 °C  | ✓ | 0.1075049 ± 0.0033170 | 0.00328991 ± 0.00012589 | 0.7926 |
| 13C2185          | 1025 °C | ✓ | 0.0882663 ± 0.0023862 | 0.00330211 ± 0.00011257 | 0.7619 |
| 13C2186          | 1225 °C | ✓ | 0.0592806 ± 0.0003434 | 0.00338349 ± 0.00002301 | 0.7382 |
| 13C2188          | 1400 °C | ✓ | 0.0684703 ± 0.0009459 | 0.00339393 ± 0.00006862 | 0.6340 |

| Results          | 40(a)/36(a) ± 2σ      | 40(r)/39(k) ± 2σ  | Age ± 2σ (Ka)               | MSWD            |
|------------------|-----------------------|-------------------|-----------------------------|-----------------|
| Inverse Isochron | 294.18 ± 2.25         | 0.08095 ± 0.06620 | 214.5 ± 175.4               | 0.69            |
| Clustered Points | ± 0.77%               | ± 81.78%          | ± 81.77%                    | 66%             |
|                  |                       |                   | Full External Error ± 175.4 |                 |
|                  |                       |                   | Analytical Error ± 175.4    |                 |
|                  |                       |                   |                             |                 |
| Statistics       | 2σ Confidence Limit   | 2.15              | Convergence                 | 0.0000030139    |
|                  | Error Magnification   | 1.0000            | Number of Iterations        | 4               |
|                  | Number of Data Points | 8                 | Calculated Line             | Weighted York-2 |
|                  | Spreading Factor      | 0.9%              |                             |                 |



| OSU Argon Geochronology Lab |         |   |           |           |           |           |           |           |           |           |           |           |                   |                |         |         |               |
|-----------------------------|---------|---|-----------|-----------|-----------|-----------|-----------|-----------|-----------|-----------|-----------|-----------|-------------------|----------------|---------|---------|---------------|
| Relative Abundances         |         |   | 40Ar      |           | 39Ar      |           | 38Ar      |           | 37Ar      |           | 36Ar      |           | 40(r)/39(k) ± 2σ  | Age ± 2σ       | 40Ar(r) | 39Ar(k) | K/Ca ± 2σ     |
|                             |         |   | [V]       | 1σ        |                   | (Ka)           | (%)     | (%)     |               |
| 13C2177                     | 500 °C  | ✓ | 2.583953  | 0.0011476 | 0.0461317 | 0.0000354 | 0.0043328 | 0.0000445 | 0.0180725 | 0.0007258 | 0.0087788 | 0.0000293 | 0.18811 ± 0.37865 | 498.5 ± 1003.5 | 0.34    | 4.43    | 1.097 ± 0.088 |
| 13C2179                     | 600 °C  | ✓ | 1.644194  | 0.0105318 | 0.1336089 | 0.0002665 | 0.0063679 | 0.0000416 | 0.0600283 | 0.0015593 | 0.0055500 | 0.0000246 | 0.06727 ± 0.19160 | 178.2 ± 507.6  | 0.55    | 12.83   | 0.957 ± 0.050 |
| 13C2180                     | 700 °C  | ✓ | 1.617707  | 0.0105192 | 0.1958824 | 0.0003036 | 0.0067369 | 0.0000447 | 0.1008202 | 0.0024793 | 0.0054955 | 0.0000240 | 0.00866 ± 0.12967 | 22.9 ± 343.5   | 0.10    | 18.81   | 0.835 ± 0.041 |
| 13C2182                     | 800 °C  | ✓ | 1.360907  | 0.0105460 | 0.1801129 | 0.0001690 | 0.0049967 | 0.0000345 | 0.1001111 | 0.0024616 | 0.0046237 | 0.0000264 | 0.01325 ± 0.14567 | 35.1 ± 385.9   | 0.18    | 17.30   | 0.773 ± 0.038 |
| 13C2183                     | 900 °C  | ✓ | 0.688173  | 0.0105249 | 0.0740035 | 0.0001487 | 0.0019386 | 0.0000320 | 0.0439960 | 0.0011757 | 0.0022756 | 0.0000260 | 0.25888 ± 0.35240 | 685.7 ± 933.3  | 2.78    | 7.11    | 0.723 ± 0.039 |
| 13C2185                     | 1025 °C | ✓ | 0.793992  | 0.0105191 | 0.0701155 | 0.0001874 | 0.0018608 | 0.0000347 | 0.0578931 | 0.0014667 | 0.0026370 | 0.0000281 | 0.27447 ± 0.38256 | 727.0 ± 1013.2 | 2.42    | 6.73    | 0.520 ± 0.027 |
| 13C2186                     | 1225 °C | ✓ | 3.920190  | 0.0105696 | 0.2325754 | 0.0002457 | 0.0077128 | 0.0000312 | 0.2944274 | 0.0071893 | 0.0133415 | 0.0000274 | 0.00302 ± 0.11472 | 8.0 ± 303.9    | 0.02    | 22.33   | 0.339 ± 0.017 |
| 13C2188                     | 1400 °C | ✓ | 1.589396  | 0.0105745 | 0.1089295 | 0.0002018 | 0.0032831 | 0.0000547 | 0.1644573 | 0.0040026 | 0.0054376 | 0.0000410 | 0.04244 ± 0.29577 | 112.5 ± 783.7  | 0.29    | 10.46   | 0.285 ± 0.014 |
| Σ                           |         |   | 14.198512 | 0.0279119 | 1.0413599 | 0.0005927 | 0.0372296 | 0.0001145 | 0.8398059 | 0.0092954 | 0.0481396 | 0.0000815 |                   |                |         |         |               |

| Information on Analysis and Constants Used in Calculations |                                                                 | Results               |                             |                             |              |                     |                      |  |
|------------------------------------------------------------|-----------------------------------------------------------------|-----------------------|-----------------------------|-----------------------------|--------------|---------------------|----------------------|--|
|                                                            |                                                                 | 40(a)/36(a) ± 2σ      | 40(r)/39(k) ± 2σ            | Age ± 2σ (Ka)               | MSWD         | 39Ar(k) (%.n)       | K/Ca ± 2σ            |  |
| Sample = 1180256-2                                         | Age Equations = Min et al. (2000)                               |                       |                             |                             |              |                     |                      |  |
| Material = Groundmass                                      | Negative Intensities = Allowed                                  |                       | 0.02206 ± 0.06414 ± 290.67% | 58.5 ± 169.9 ± 290.67%      | 0.77 62%     | 100.00 8            | 0.431 ± 0.158        |  |
| Location = Kerguelen Plateau                               | Decay Constant 40K = 5.543 ± 0.044 E-10 1/a                     |                       |                             | Full External Error ± 169.9 | 2.07         | 2σ Confidence Limit |                      |  |
| Analyst = Kyle Krawl                                       | Decay Constant 39Ar = 2.940 ± 0.029 E-07 1/h                    |                       |                             | Analytical Error ± 169.9    | 1.0000       | Error Magnification |                      |  |
| Project = KERGUELEN                                        | Decay Constant 37Ar = 8.230 ± 0.082 E-04 1/h                    |                       |                             |                             |              |                     |                      |  |
| Mass Discrimination Law = LIN                              | Decay Constant 36Cl = 2.236 ± 0.045 E-06 1/a                    |                       |                             |                             |              |                     |                      |  |
| Irradiation = OSU2C13                                      | Decay Constant 40K(EC,β <sup>+</sup> ) = 0.580 ± 0.009 E-10 1/a |                       | 0.03733 ± 0.07085 ± 189.77% | 98.9 ± 187.7 ± 189.76%      |              | 8                   | 0.533 ± 0.012        |  |
| J = 0.00146860 ± 0.00000405                                | Decay Constant 40K(β <sup>-</sup> ) = 4.950 ± 0.043 E-10 1/a    |                       |                             | Full External Error ± 187.7 |              |                     |                      |  |
| FCT-3 = 28.201 ± 0.023 Ma                                  | Atmospheric Ratio 40/36(a) = 295.50                             |                       |                             | Analytical Error ± 187.7    |              |                     |                      |  |
| IGSN = Undefined                                           | Atmospheric Ratio 38/36(a) = 0.1869                             |                       |                             |                             |              |                     |                      |  |
| Preferred Age = Undefined                                  | Production Ratio 39/37(ca) = 0.000673                           | 294.20 ± 2.25 ± 0.76% | 0.07899 ± 0.11817 ± 149.60% | 209.3 ± 313.0 ± 149.59%     | 0.66 68%     | 100.00 8            |                      |  |
| Classification = Undefined                                 | Production Ratio 38/37(ca) = 0.000139                           |                       |                             | Full External Error ± 313.1 | 2.15         | 2σ Confidence Limit |                      |  |
| Experiment Type = Undefined                                | Production Ratio 36/37(ca) = 0.000264                           |                       |                             | Analytical Error ± 313.0    | 1.0000       | Error Magnification |                      |  |
| Extraction Method = Undefined                              | Production Ratio 40/39(k) = 0.001010                            |                       |                             |                             |              | 4                   | Number of Iterations |  |
| Heating = 0 sec                                            | Production Ratio 38/39(k) = 0.011380                            |                       |                             |                             |              | Convergence         |                      |  |
| Isolation = 15.00 min                                      | Production Ratio 36/38(cl) = 316.00 ± 15.80                     |                       |                             |                             | 0.0000000001 |                     |                      |  |
| Instrument = MAP215-50                                     | Scaling Ratio K/Ca = 0.430                                      |                       |                             |                             |              |                     |                      |  |
| Lithology = Undefined                                      | Abundance Ratio 40K/K = 1.1700 ± 0.0199 E-04                    | 294.18 ± 2.25 ± 0.77% | 0.08095 ± 0.06620 ± 81.78%  | 214.5 ± 175.4 ± 81.77%      | 0.69 66%     | 100.00 8            |                      |  |
| Lat-Lon = Undefined - Undefined                            | Atomic Weight K = 39.0983 ± 0.0001 g                            |                       |                             | Full External Error ± 175.4 | 2.15         | 2σ Confidence Limit |                      |  |
| R1 ratio = Undefined                                       | Recalibrated to FCT-3 Secondary Standard                        |                       |                             | Analytical Error ± 175.4    | 1.0000       | Error Magnification |                      |  |
| R2 ratio = Undefined                                       | Standard Age = 28.201 ± 0.023 Ma                                |                       |                             |                             |              | 4                   | Number of Iterations |  |
| R3 ratio = Undefined                                       |                                                                 |                       |                             |                             | 0.0000030139 | Convergence         |                      |  |
| R4 ratio = Undefined                                       |                                                                 |                       |                             |                             | 1%           | Spreading Factor    |                      |  |
| R5 ratio = Undefined                                       |                                                                 |                       |                             |                             |              |                     |                      |  |
| Collector Calibrations =                                   |                                                                 |                       |                             |                             |              |                     |                      |  |



| OSU Argon Geochronology Lab |         |         |                |           |                |           |                 |           |                 |           |                 |           |                |           |                |           |                |           |                 |           |                 |           |                |           |                 |           |                |           |                |           |                |           |                |           |      |
|-----------------------------|---------|---------|----------------|-----------|----------------|-----------|-----------------|-----------|-----------------|-----------|-----------------|-----------|----------------|-----------|----------------|-----------|----------------|-----------|-----------------|-----------|-----------------|-----------|----------------|-----------|-----------------|-----------|----------------|-----------|----------------|-----------|----------------|-----------|----------------|-----------|------|
| Degassing<br>Patterns       |         |         | 36Ar(a)<br>[V] | %1σ       | 36Ar(c)<br>[V] | %1σ       | 36Ar(ca)<br>[V] | %1σ       | 36Ar(cl)<br>[V] | %1σ       | 37Ar(ca)<br>[V] | %1σ       | 38Ar(a)<br>[V] | %1σ       | 38Ar(c)<br>[V] | %1σ       | 38Ar(k)<br>[V] | %1σ       | 38Ar(ca)<br>[V] | %1σ       | 38Ar(cl)<br>[V] | %1σ       | 39Ar(k)<br>[V] | %1σ       | 39Ar(ca)<br>[V] | %1σ       | 40Ar(r)<br>[V] | %1σ       | 40Ar(a)<br>[V] | %1σ       | 40Ar(c)<br>[V] | %1σ       | 40Ar(k)<br>[V] | %1σ       |      |
|                             | 13C2177 | 500 °C  | ✓              | 0.0087735 | 0.33           | 0.0000000 | 0.00            | 0.0000048 | 4.02            | 0.0000005 | 5.77            | 0.0180725 | 4.02           | 0.0016398 | 0.33           | 0.0000000 | 0.00           | 0.0005248 | 0.08            | 0.0000025 | 4.02            | 0.0021657 | 7.89           | 0.0461195 | 0.08            | 0.0000122 | 4.02           | 0.0086757 | 100.64         | 2.592582  | 0.33           | 0.0000000 | 0.00           | 0.0000466 | 0.08 |
|                             | 13C2179 | 600 °C  | ✓              | 0.0055332 | 0.44           | 0.0000000 | 0.00            | 0.0000158 | 2.60            | 0.0000009 | 5.50            | 0.0600283 | 2.60           | 0.0010342 | 0.44           | 0.0000000 | 0.00           | 0.0015200 | 0.20            | 0.0000083 | 2.60            | 0.0038054 | 7.70           | 0.1335685 | 0.20            | 0.0000404 | 2.60           | 0.0089845 | 142.42         | 1.635074  | 0.44           | 0.0000000 | 0.00           | 0.0001349 | 0.20 |
|                             | 13C2180 | 700 °C  | ✓              | 0.0054681 | 0.44           | 0.0000000 | 0.00            | 0.0000266 | 2.46            | 0.0000008 | 5.54            | 0.1008202 | 2.46           | 0.0010220 | 0.44           | 0.0000000 | 0.00           | 0.0022284 | 0.16            | 0.0000140 | 2.46            | 0.0034725 | 7.73           | 0.1958145 | 0.16            | 0.0000679 | 2.46           | 0.0016953 | 748.89         | 1.615814  | 0.44           | 0.0000000 | 0.00           | 0.0001978 | 0.16 |
|                             | 13C2182 | 800 °C  | ✓              | 0.0045968 | 0.57           | 0.0000000 | 0.00            | 0.0000264 | 2.46            | 0.0000005 | 5.64            | 0.1001111 | 2.46           | 0.0008591 | 0.57           | 0.0000000 | 0.00           | 0.0020489 | 0.09            | 0.0000139 | 2.46            | 0.0020747 | 7.80           | 0.1800455 | 0.09            | 0.0000674 | 2.46           | 0.0023851 | 549.82         | 1.358340  | 0.57           | 0.0000000 | 0.00           | 0.0001818 | 0.09 |
|                             | 13C2183 | 900 °C  | ✓              | 0.0022638 | 1.15           | 0.0000000 | 0.00            | 0.0000116 | 2.67            | 0.0000002 | 7.25            | 0.0439960 | 2.67           | 0.0004231 | 1.15           | 0.0000000 | 0.00           | 0.0008418 | 0.20            | 0.0000061 | 2.67            | 0.0006675 | 9.03           | 0.0739739 | 0.20            | 0.0000296 | 2.67           | 0.0191502 | 68.06          | 0.668948  | 1.15           | 0.0000000 | 0.00           | 0.0000747 | 0.20 |
|                             | 13C2185 | 1025 °C | ✓              | 0.0026216 | 1.07           | 0.0000000 | 0.00            | 0.0000153 | 2.53            | 0.0000001 | 8.23            | 0.0578931 | 2.53           | 0.0004900 | 1.07           | 0.0000000 | 0.00           | 0.0007975 | 0.27            | 0.0000080 | 2.53            | 0.0005653 | 9.84           | 0.0700765 | 0.27            | 0.0000390 | 2.53           | 0.0192337 | 69.69          | 0.774688  | 1.07           | 0.0000000 | 0.00           | 0.0000708 | 0.27 |
|                             | 13C2186 | 1225 °C | ✓              | 0.0132631 | 0.21           | 0.0000000 | 0.00            | 0.0000777 | 2.44            | 0.0000006 | 5.53            | 0.2944274 | 2.44           | 0.0024789 | 0.21           | 0.0000000 | 0.00           | 0.0026445 | 0.11            | 0.0000409 | 2.44            | 0.0025485 | 7.72           | 0.2323773 | 0.11            | 0.0001981 | 2.44           | 0.0007029 | 1896.25        | 3.919252  | 0.21           | 0.0000000 | 0.00           | 0.0002347 | 0.11 |
|                             | 13C2188 | 1400 °C | ✓              | 0.0053939 | 0.76           | 0.0000000 | 0.00            | 0.0000434 | 2.43            | 0.0000002 | 7.67            | 0.1644573 | 2.43           | 0.0010081 | 0.76           | 0.0000000 | 0.00           | 0.0012384 | 0.19            | 0.0000229 | 2.43            | 0.0010138 | 9.37           | 0.1088189 | 0.19            | 0.0001107 | 2.43           | 0.0046188 | 348.42         | 1.593905  | 0.76           | 0.0000000 | 0.00           | 0.0001099 | 0.19 |
|                             |         | Σ       |                | 0.0479141 | 0.17           | 0.0000000 | 0.00            | 0.0002217 | 1.11            | 0.0000038 | 2.30            | 0.8398059 | 1.11           | 0.0089551 | 0.17           | 0.0000000 | 0.00           | 0.0118442 | 0.06            | 0.0001167 | 1.11            | 0.0163135 | 3.17           | 1.0407947 | 0.06            | 0.0005652 | 1.11           | 0.0388573 | 94.88          | 14.158604 | 0.17           | 0.0000000 | 0.00           | 0.0010512 | 0.06 |
|                             | Σ       |         |                |           |                |           |                 |           |                 | 0.0481396 | 0.17            | 0.8398059 | 1.11           |           |                |           |                |           |                 |           | 0.0372296       | 1.39      |                |           | 1.0413599       | 0.06      |                |           |                |           |                |           | 14.198512      | 0.31      |      |



| Additional Parameters |         |   | 40Ar/39Ar | 1σ       | 37Ar/39Ar | 1σ       | 36Ar/39Ar | 1σ       | Time (days) | 37Ar (decay) | 39Ar (decay) | 40Ar (moles) |
|-----------------------|---------|---|-----------|----------|-----------|----------|-----------|----------|-------------|--------------|--------------|--------------|
| 13C2177               | 500 °C  | ✓ | 56.012566 | 0.049646 | 0.391760  | 0.015736 | 0.190299  | 0.000652 | 121.809     | 11.116605    | 1.00086074   | 5.168E-13    |
| 13C2179               | 600 °C  | ✓ | 12.306015 | 0.082559 | 0.449284  | 0.011705 | 0.041539  | 0.000202 | 121.845     | 11.124537    | 1.00086099   | 3.288E-13    |
| 13C2180               | 700 °C  | ✓ | 8.258566  | 0.055207 | 0.514698  | 0.012682 | 0.028055  | 0.000130 | 121.863     | 11.128352    | 1.00086111   | 3.235E-13    |
| 13C2182               | 800 °C  | ✓ | 7.555856  | 0.058980 | 0.555824  | 0.013677 | 0.025671  | 0.000148 | 121.898     | 11.136140    | 1.00086136   | 2.722E-13    |
| 13C2183               | 900 °C  | ✓ | 9.299192  | 0.143444 | 0.594513  | 0.015933 | 0.030749  | 0.000357 | 121.915     | 11.139959    | 1.00086149   | 1.376E-13    |
| 13C2185               | 1025 °C | ✓ | 11.324060 | 0.153049 | 0.825681  | 0.021035 | 0.037610  | 0.000413 | 121.953     | 11.148213    | 1.00086175   | 1.588E-13    |
| 13C2186               | 1225 °C | ✓ | 16.855563 | 0.048809 | 1.265944  | 0.030941 | 0.057364  | 0.000133 | 121.971     | 11.152190    | 1.00086188   | 7.840E-13    |
| 13C2188               | 1400 °C | ✓ | 14.591047 | 0.100770 | 1.509758  | 0.036851 | 0.049918  | 0.000388 | 122.008     | 11.160300    | 1.00086214   | 3.179E-13    |



| Procedure<br>Blanks |         | 36Ar<br>[V] | 1σ        | 37Ar<br>[V] | 1σ        | 38Ar<br>[V] | 1σ        | 39Ar<br>[V] | 1σ        | 40Ar<br>[V] | 1σ        |
|---------------------|---------|-------------|-----------|-------------|-----------|-------------|-----------|-------------|-----------|-------------|-----------|
| 13C2177             | 500 °C  | 0.0003106   | 0.0000182 | 0.0000398   | 0.0000235 | 0.0000157   | 0.0000176 | 0.0000348   | 0.0000231 | 0.0063094   | 0.0000542 |
| 13C2179             | 600 °C  | 0.0004879   | 0.0000186 | 0.0000290   | 0.0000248 | 0.0000001   | 0.0000172 | 0.0002205   | 0.0001334 | 0.0476972   | 0.0105048 |
| 13C2180             | 700 °C  | 0.0004489   | 0.0000186 | 0.0000364   | 0.0000248 | 0.0000001   | 0.0000172 | 0.0003083   | 0.0001334 | 0.0419916   | 0.0105048 |
| 13C2182             | 800 °C  | 0.0003823   | 0.0000186 | 0.0000454   | 0.0000248 | 0.0000049   | 0.0000172 | 0.0003867   | 0.0001334 | 0.0303523   | 0.0105048 |
| 13C2183             | 900 °C  | 0.0003560   | 0.0000186 | 0.0000469   | 0.0000248 | 0.0000097   | 0.0000172 | 0.0003757   | 0.0001334 | 0.0246467   | 0.0105048 |
| 13C2185             | 1025 °C | 0.0003134   | 0.0000186 | 0.0000435   | 0.0000248 | 0.0000253   | 0.0000172 | 0.0002412   | 0.0001334 | 0.0123227   | 0.0105048 |
| 13C2186             | 1225 °C | 0.0002998   | 0.0000186 | 0.0000386   | 0.0000248 | 0.0000354   | 0.0000172 | 0.0001224   | 0.0001334 | 0.0063890   | 0.0105048 |
| 13C2188             | 1400 °C | 0.0002862   | 0.0000186 | 0.0000222   | 0.0000248 | 0.0000613   | 0.0000172 | 0.0002286   | 0.0001334 | 0.0057068   | 0.0105048 |



| OSU Argon Geochronology Lab |         |             |           |           |        |             |           |           |        |             |           |           |        |             |           |           |        |             |           |           |        |                  |
|-----------------------------|---------|-------------|-----------|-----------|--------|-------------|-----------|-----------|--------|-------------|-----------|-----------|--------|-------------|-----------|-----------|--------|-------------|-----------|-----------|--------|------------------|
| Intercept<br>Values         |         | 36Ar<br>[V] | 1σ        | r2        |        | 37Ar<br>[V] | 1σ        | r2        |        | 38Ar<br>[V] | 1σ        | r2        |        | 39Ar<br>[V] | 1σ        | r2        |        | 40Ar<br>[V] | 1σ        | r2        |        |                  |
|                             | 13C2177 | 500 °C      | 0.0094244 | 0.0000243 | 0.9847 | EXP #       | 0.0017125 | 0.0000483 | 0.3614 | LIN # 2 9   | 0.0044340 | 0.0000418 | 0.6330 | LIN #       | 0.0466106 | 0.0000272 | 0.9987 | EXP #       | 2.5936344 | 0.0011479 | 0.9997 | EXP # 2 3 4 7 11 |
|                             | 13C2179 | 600 °C      | 0.0062500 | 0.0000175 | 0.9616 | EXP # 1 2 3 | 0.0055810 | 0.0000479 | 0.9228 | EXP # 2 4   | 0.0064937 | 0.0000388 | 0.9480 | LIN # 5     | 0.1351159 | 0.0002336 | 0.9939 | EXP #       | 1.6940932 | 0.0007549 | 0.9998 | EXP # 2 3 4      |
|                             | 13C2180 | 700 °C      | 0.0061550 | 0.0000167 | 0.9906 | EXP # 1 3   | 0.0093589 | 0.0000385 | 0.9754 | LIN # 4     | 0.0068706 | 0.0000422 | 0.9348 | LIN #       | 0.1980966 | 0.0002760 | 0.9970 | EXP #       | 1.6620259 | 0.0005523 | 0.9999 | EXP # 2 3 4 7 9  |
|                             | 13C2182 | 800 °C      | 0.0051826 | 0.0000201 | 0.9382 | EXP # 1 2 5 | 0.0092950 | 0.0000376 | 0.9871 | EXP # 3 4   | 0.0051001 | 0.0000307 | 0.9331 | LIN #       | 0.1822339 | 0.0001061 | 0.9995 | EXP #       | 1.3930705 | 0.0009329 | 0.9996 | EXP # 2 3 4 7 9  |
|                             | 13C2183 | 900 °C      | 0.0027187 | 0.0000196 | 0.9144 | LIN # 2     | 0.0041105 | 0.0000398 | 0.9266 | EXP # 6     | 0.0019865 | 0.0000277 | 0.8463 | LIN #       | 0.0750920 | 0.0000685 | 0.9988 | EXP # 1     | 0.7137473 | 0.0006524 | 0.9994 | EXP # 2 3 4 5 8  |
|                             | 13C2185 | 1025 °C     | 0.0030510 | 0.0000225 | 0.8830 | LIN # 1     | 0.0053861 | 0.0000333 | 0.9720 | EXP #       | 0.0019226 | 0.0000309 | 0.7671 | LIN #       | 0.0710248 | 0.0001341 | 0.9935 | EXP #       | 0.8072835 | 0.0005497 | 0.9995 | EXP # 2 3 4 9    |
|                             | 13C2186 | 1225 °C     | 0.0141500 | 0.0000216 | 0.9948 | EXP #       | 0.0272025 | 0.0001009 | 0.9817 | LIN # 5     | 0.0079004 | 0.0000268 | 0.9469 | LIN #       | 0.2349366 | 0.0002090 | 0.9962 | EXP #       | 3.9316899 | 0.0011709 | 0.9996 | EXP #            |
|                             | 13C2188 | 1400 °C     | 0.0059313 | 0.0000383 | 0.9500 | EXP # 1 2 7 | 0.0151840 | 0.0000421 | 0.9912 | EXP # 3     | 0.0034093 | 0.0000531 | 0.5073 | LIN #       | 0.1097491 | 0.0001539 | 0.9933 | EXP #       | 1.5857509 | 0.0012140 | 0.9988 | EXP # 2 3        |



| OSU Argon Geochronology Lab |         |         |           |            |                   |            |      |               |                  |       |                     |                    |     |            |       |               |     |        |       |              |                        |     |       |      |      |     |        |             |       |       |         |           |            |     |
|-----------------------------|---------|---------|-----------|------------|-------------------|------------|------|---------------|------------------|-------|---------------------|--------------------|-----|------------|-------|---------------|-----|--------|-------|--------------|------------------------|-----|-------|------|------|-----|--------|-------------|-------|-------|---------|-----------|------------|-----|
| Sample Parameters           |         |         | Sample    | Material   | Location          | Analyst    | Temp | Standard Name | Standard (in Ma) | %1σ   | Standard Reference  | Standard 40Ar/39Ar | %1σ | J          | %1σ   | Air 40Ar/36Ar | %1σ | MDF    | %1σ   | Volume Ratio | Sensitivity (mol/volt) | Day | Month | Year | Hour | Min | Resist | Irradiation | X-pos | Y-pos | Z/H-pos | Project   | Experiment | Nmb |
|                             | 13C2177 | 500 °C  | 1180256-2 | Groundmass | Kerguelen Plateau | Kyle Krawl | 500  | FCT-3         | 28.201           | 0.083 | Kuiper et al., 2008 |                    |     | 0.00146860 | 0.276 |               |     | 1.0092 | 0.001 | 0.9987       | 2E-13                  | 5   | AUG   | 2013 | 11   | 26  | 1      | OSU2C13     | 0.00  | 0.00  | 60.60   | Kerguelen | 13C2177    | 01  |
|                             | 13C2179 | 600 °C  | 1180256-2 | Groundmass | Kerguelen Plateau | Kyle Krawl | 600  | FCT-3         | 28.201           | 0.083 | Kuiper et al., 2008 |                    |     | 0.00146860 | 0.276 |               |     | 1.0092 | 0.001 | 0.9987       | 2E-13                  | 5   | AUG   | 2013 | 12   | 18  | 1      | OSU2C13     | 0.00  | 0.00  | 60.60   | Kerguelen | 13C2177    | 01  |
|                             | 13C2180 | 700 °C  | 1180256-2 | Groundmass | Kerguelen Plateau | Kyle Krawl | 700  | FCT-3         | 28.201           | 0.083 | Kuiper et al., 2008 |                    |     | 0.00146860 | 0.276 |               |     | 1.0092 | 0.001 | 0.9986       | 2E-13                  | 5   | AUG   | 2013 | 12   | 43  | 1      | OSU2C13     | 0.00  | 0.00  | 60.60   | Kerguelen | 13C2177    | 01  |
|                             | 13C2182 | 800 °C  | 1180256-2 | Groundmass | Kerguelen Plateau | Kyle Krawl | 800  | FCT-3         | 28.201           | 0.083 | Kuiper et al., 2008 |                    |     | 0.00146860 | 0.276 |               |     | 1.0092 | 0.001 | 0.9987       | 2E-13                  | 5   | AUG   | 2013 | 13   | 34  | 1      | OSU2C13     | 0.00  | 0.00  | 60.60   | Kerguelen | 13C2177    | 01  |
|                             | 13C2183 | 900 °C  | 1180256-2 | Groundmass | Kerguelen Plateau | Kyle Krawl | 900  | FCT-3         | 28.201           | 0.083 | Kuiper et al., 2008 |                    |     | 0.00146860 | 0.276 |               |     | 1.0092 | 0.001 | 0.9987       | 2E-13                  | 5   | AUG   | 2013 | 13   | 59  | 1      | OSU2C13     | 0.00  | 0.00  | 60.60   | Kerguelen | 13C2177    | 01  |
|                             | 13C2185 | 1025 °C | 1180256-2 | Groundmass | Kerguelen Plateau | Kyle Krawl | 1025 | FCT-3         | 28.201           | 0.083 | Kuiper et al., 2008 |                    |     | 0.00146860 | 0.276 |               |     | 1.0092 | 0.001 | 0.9988       | 2E-13                  | 5   | AUG   | 2013 | 14   | 53  | 1      | OSU2C13     | 0.00  | 0.00  | 60.60   | Kerguelen | 13C2177    | 01  |
|                             | 13C2186 | 1225 °C | 1180256-2 | Groundmass | Kerguelen Plateau | Kyle Krawl | 1225 | FCT-3         | 28.201           | 0.083 | Kuiper et al., 2008 |                    |     | 0.00146860 | 0.276 |               |     | 1.0092 | 0.001 | 0.9987       | 2E-13                  | 5   | AUG   | 2013 | 15   | 19  | 1      | OSU2C13     | 0.00  | 0.00  | 60.60   | Kerguelen | 13C2177    | 01  |
|                             | 13C2188 | 1400 °C | 1180256-2 | Groundmass | Kerguelen Plateau | Kyle Krawl | 1400 | FCT-3         | 28.201           | 0.083 | Kuiper et al., 2008 |                    |     | 0.00146860 | 0.276 |               |     | 1.0092 | 0.001 | 0.9987       | 2E-13                  | 5   | AUG   | 2013 | 16   | 12  | 1      | OSU2C13     | 0.00  | 0.00  | 60.60   | Kerguelen | 13C2177    | 01  |



| Irradiation<br>Constants |         | OSU Argon Geochronology Lab |     |          |     |          |     |          |     |           |     |           |     |           |     |          |     |          |     |           |     |      |     |      |     |       |     |  |
|--------------------------|---------|-----------------------------|-----|----------|-----|----------|-----|----------|-----|-----------|-----|-----------|-----|-----------|-----|----------|-----|----------|-----|-----------|-----|------|-----|------|-----|-------|-----|--|
|                          |         | 40/36(a)                    | %1σ | 40/36(c) | %1σ | 38/36(a) | %1σ | 38/36(c) | %1σ | 39/37(ca) | %1σ | 38/37(ca) | %1σ | 36/37(ca) | %1σ | 40/39(k) | %1σ | 38/39(k) | %1σ | 36/38(cl) | %1σ | K/Ca | %1σ | K/Cl | %1σ | Ca/Cl | %1σ |  |
| 13C2177                  | 500 °C  | 295.5                       | 0   | 0.018    | 35  | 0.1869   | 0   | 1.493    | 3   | 0.000673  | 0   | 0.000139  | 0   | 0.000264  | 0   | 0.00101  | 0   | 0.01138  | 0   | 0         | 0   | 0.43 | 0   | 0    | 0   | 0     | 0   |  |
| 13C2179                  | 600 °C  | 295.5                       | 0   | 0.018    | 35  | 0.1869   | 0   | 1.493    | 3   | 0.000673  | 0   | 0.000139  | 0   | 0.000264  | 0   | 0.00101  | 0   | 0.01138  | 0   | 0         | 0   | 0.43 | 0   | 0    | 0   | 0     | 0   |  |
| 13C2180                  | 700 °C  | 295.5                       | 0   | 0.018    | 35  | 0.1869   | 0   | 1.493    | 3   | 0.000673  | 0   | 0.000139  | 0   | 0.000264  | 0   | 0.00101  | 0   | 0.01138  | 0   | 0         | 0   | 0.43 | 0   | 0    | 0   | 0     | 0   |  |
| 13C2182                  | 800 °C  | 295.5                       | 0   | 0.018    | 35  | 0.1869   | 0   | 1.493    | 3   | 0.000673  | 0   | 0.000139  | 0   | 0.000264  | 0   | 0.00101  | 0   | 0.01138  | 0   | 0         | 0   | 0.43 | 0   | 0    | 0   | 0     | 0   |  |
| 13C2183                  | 900 °C  | 295.5                       | 0   | 0.018    | 35  | 0.1869   | 0   | 1.493    | 3   | 0.000673  | 0   | 0.000139  | 0   | 0.000264  | 0   | 0.00101  | 0   | 0.01138  | 0   | 0         | 0   | 0.43 | 0   | 0    | 0   | 0     | 0   |  |
| 13C2185                  | 1025 °C | 295.5                       | 0   | 0.018    | 35  | 0.1869   | 0   | 1.493    | 3   | 0.000673  | 0   | 0.000139  | 0   | 0.000264  | 0   | 0.00101  | 0   | 0.01138  | 0   | 0         | 0   | 0.43 | 0   | 0    | 0   | 0     | 0   |  |
| 13C2186                  | 1225 °C | 295.5                       | 0   | 0.018    | 35  | 0.1869   | 0   | 1.493    | 3   | 0.000673  | 0   | 0.000139  | 0   | 0.000264  | 0   | 0.00101  | 0   | 0.01138  | 0   | 0         | 0   | 0.43 | 0   | 0    | 0   | 0     | 0   |  |
| 13C2188                  | 1400 °C | 295.5                       | 0   | 0.018    | 35  | 0.1869   | 0   | 1.493    | 3   | 0.000673  | 0   | 0.000139  | 0   | 0.000264  | 0   | 0.00101  | 0   | 0.01138  | 0   | 0         | 0   | 0.43 | 0   | 0    | 0   | 0     | 0   |  |



13C2177.AGE >>> 1180256-2 >>> KERGUELEN PROJECT

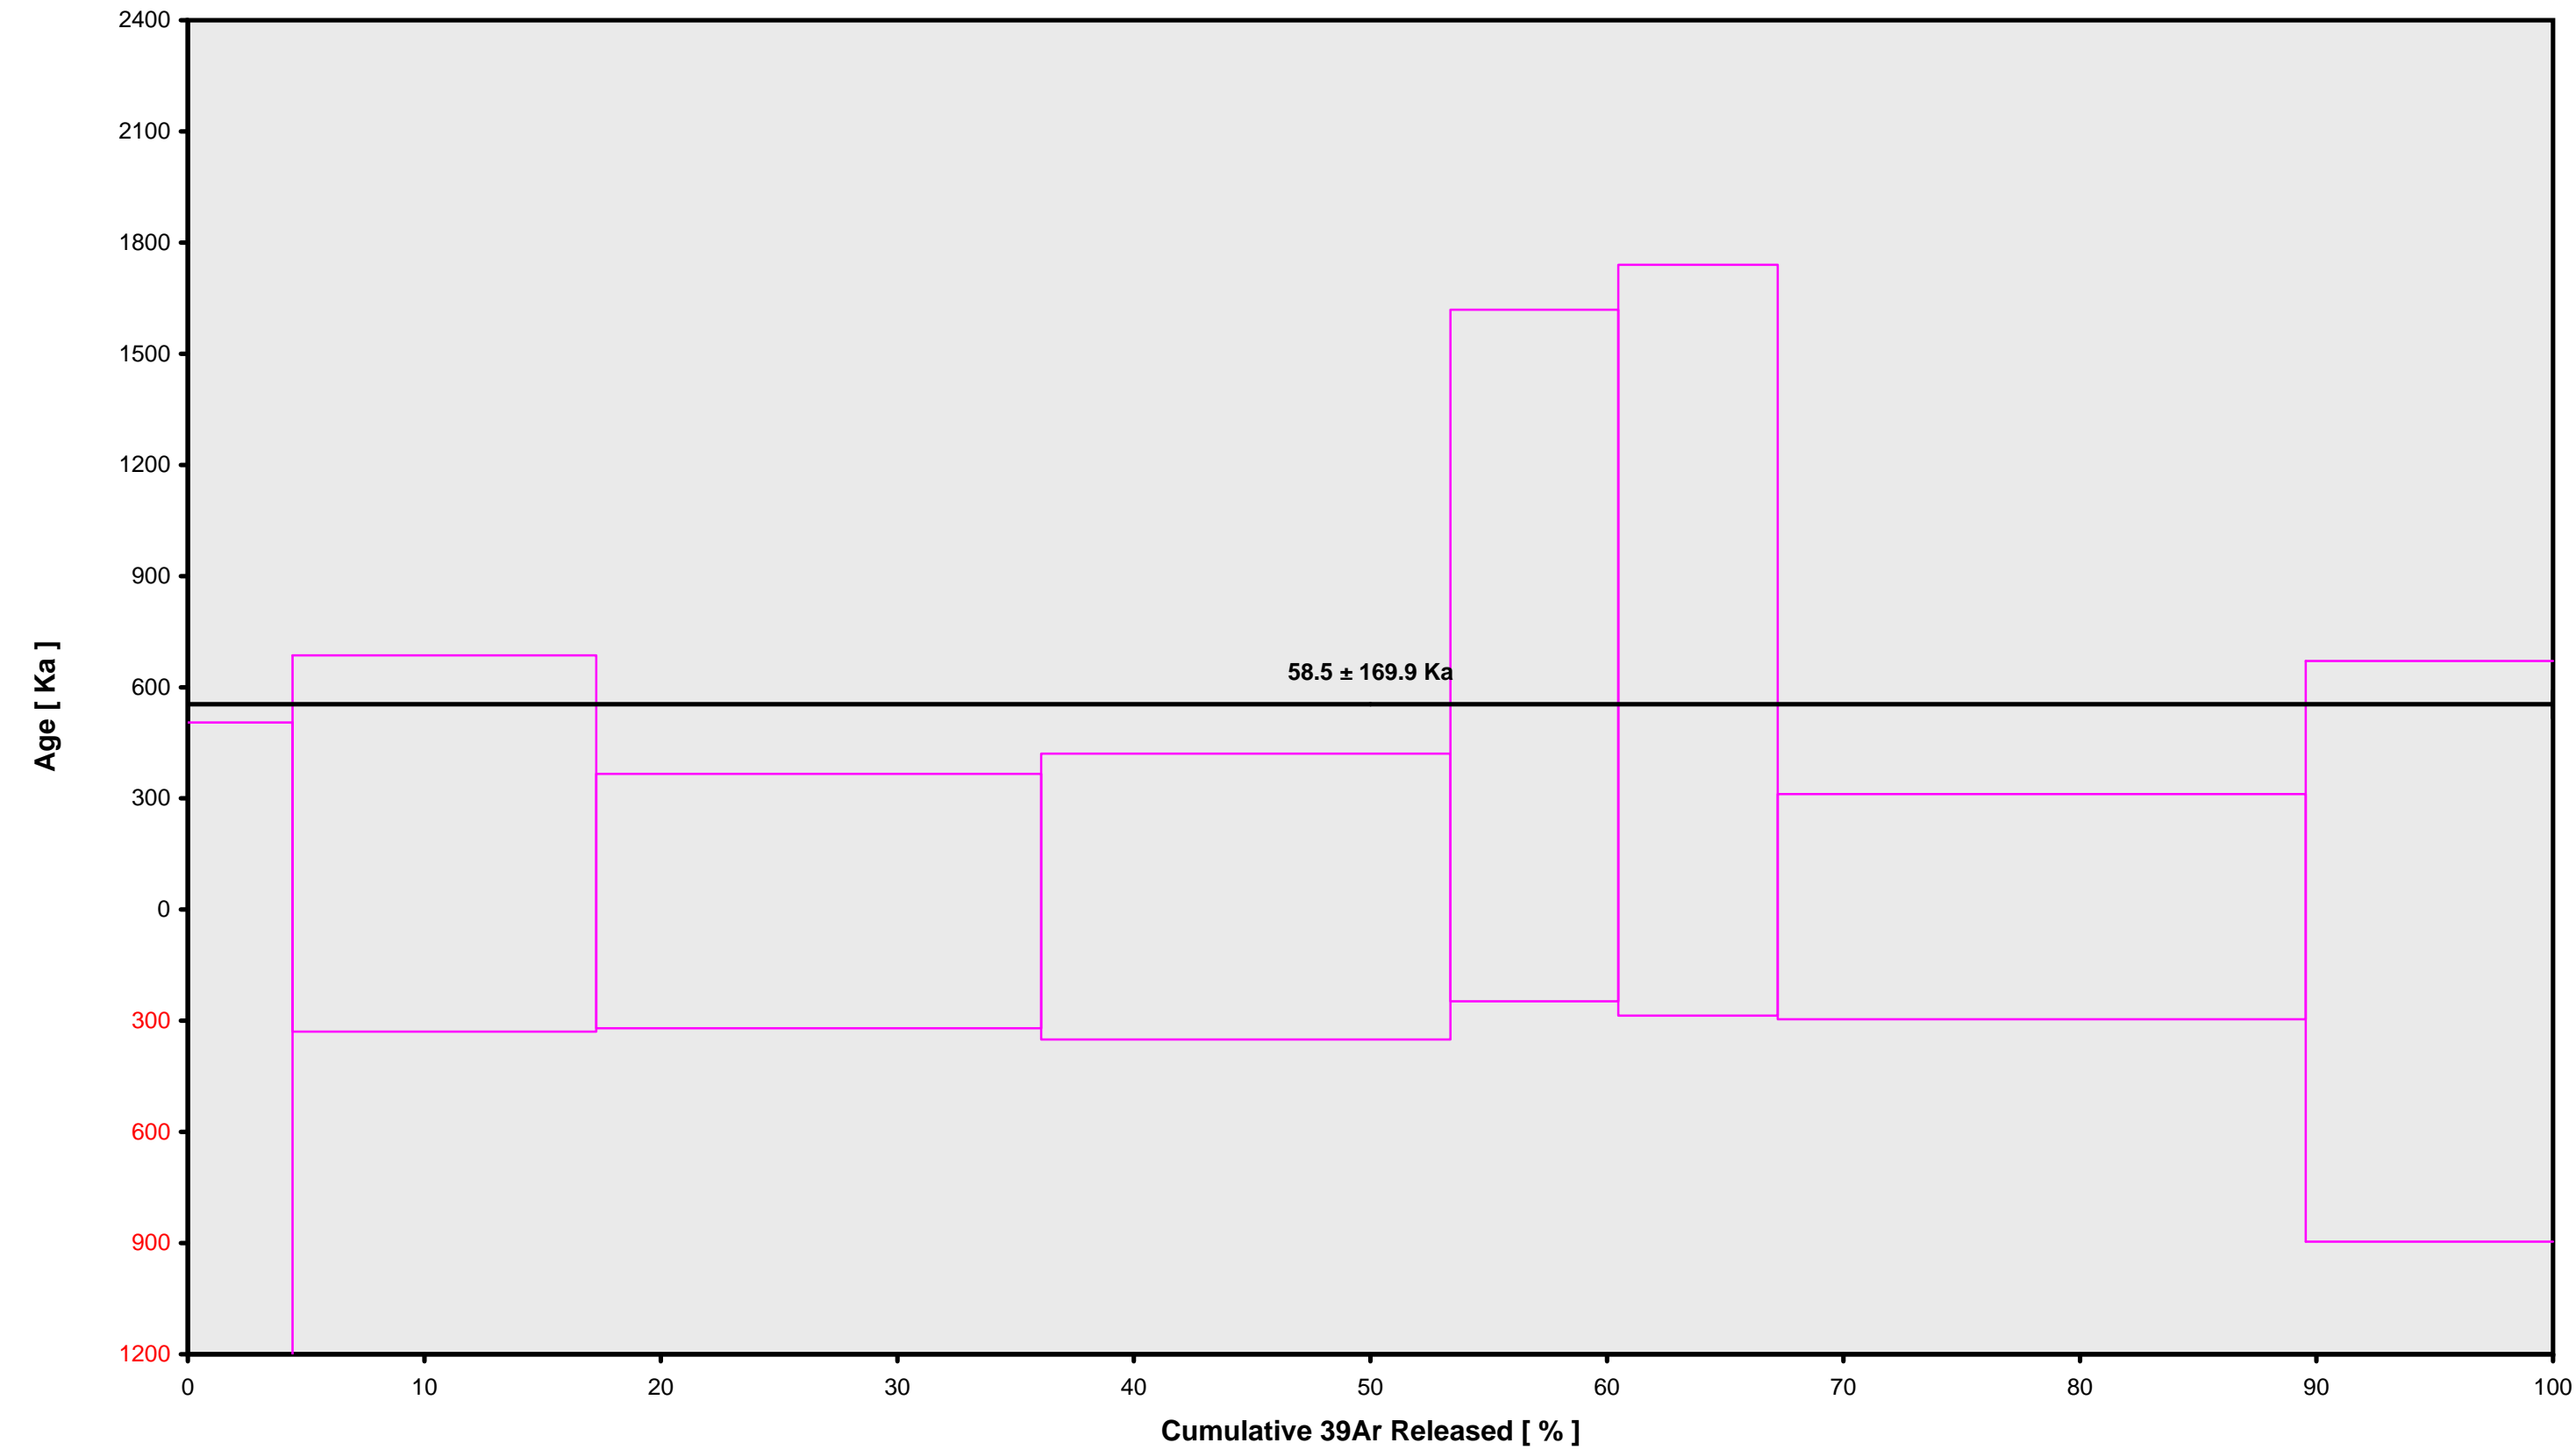

Ar-Ages in Ka

WEIGHTED PLATEAU

58.5 ± 169.9

TOTAL FUSION

98.9 ± 187.7

NORMAL ISOCHRON

209.3 ± 313.0

INVERSE ISOCHRON

214.5 ± 175.4

MSWD (PROBABILITY)

0.77 (62%)

Sample Info

Groundmass

Kerguelen Plateau

Kyle Krawl

IRR = OSU2C13

J = 0.00146860 ± 0.00000405

RECALIBRATED AGE



13C2177.AGE >>> 1180256-2 >>> KERGUELEN PROJECT

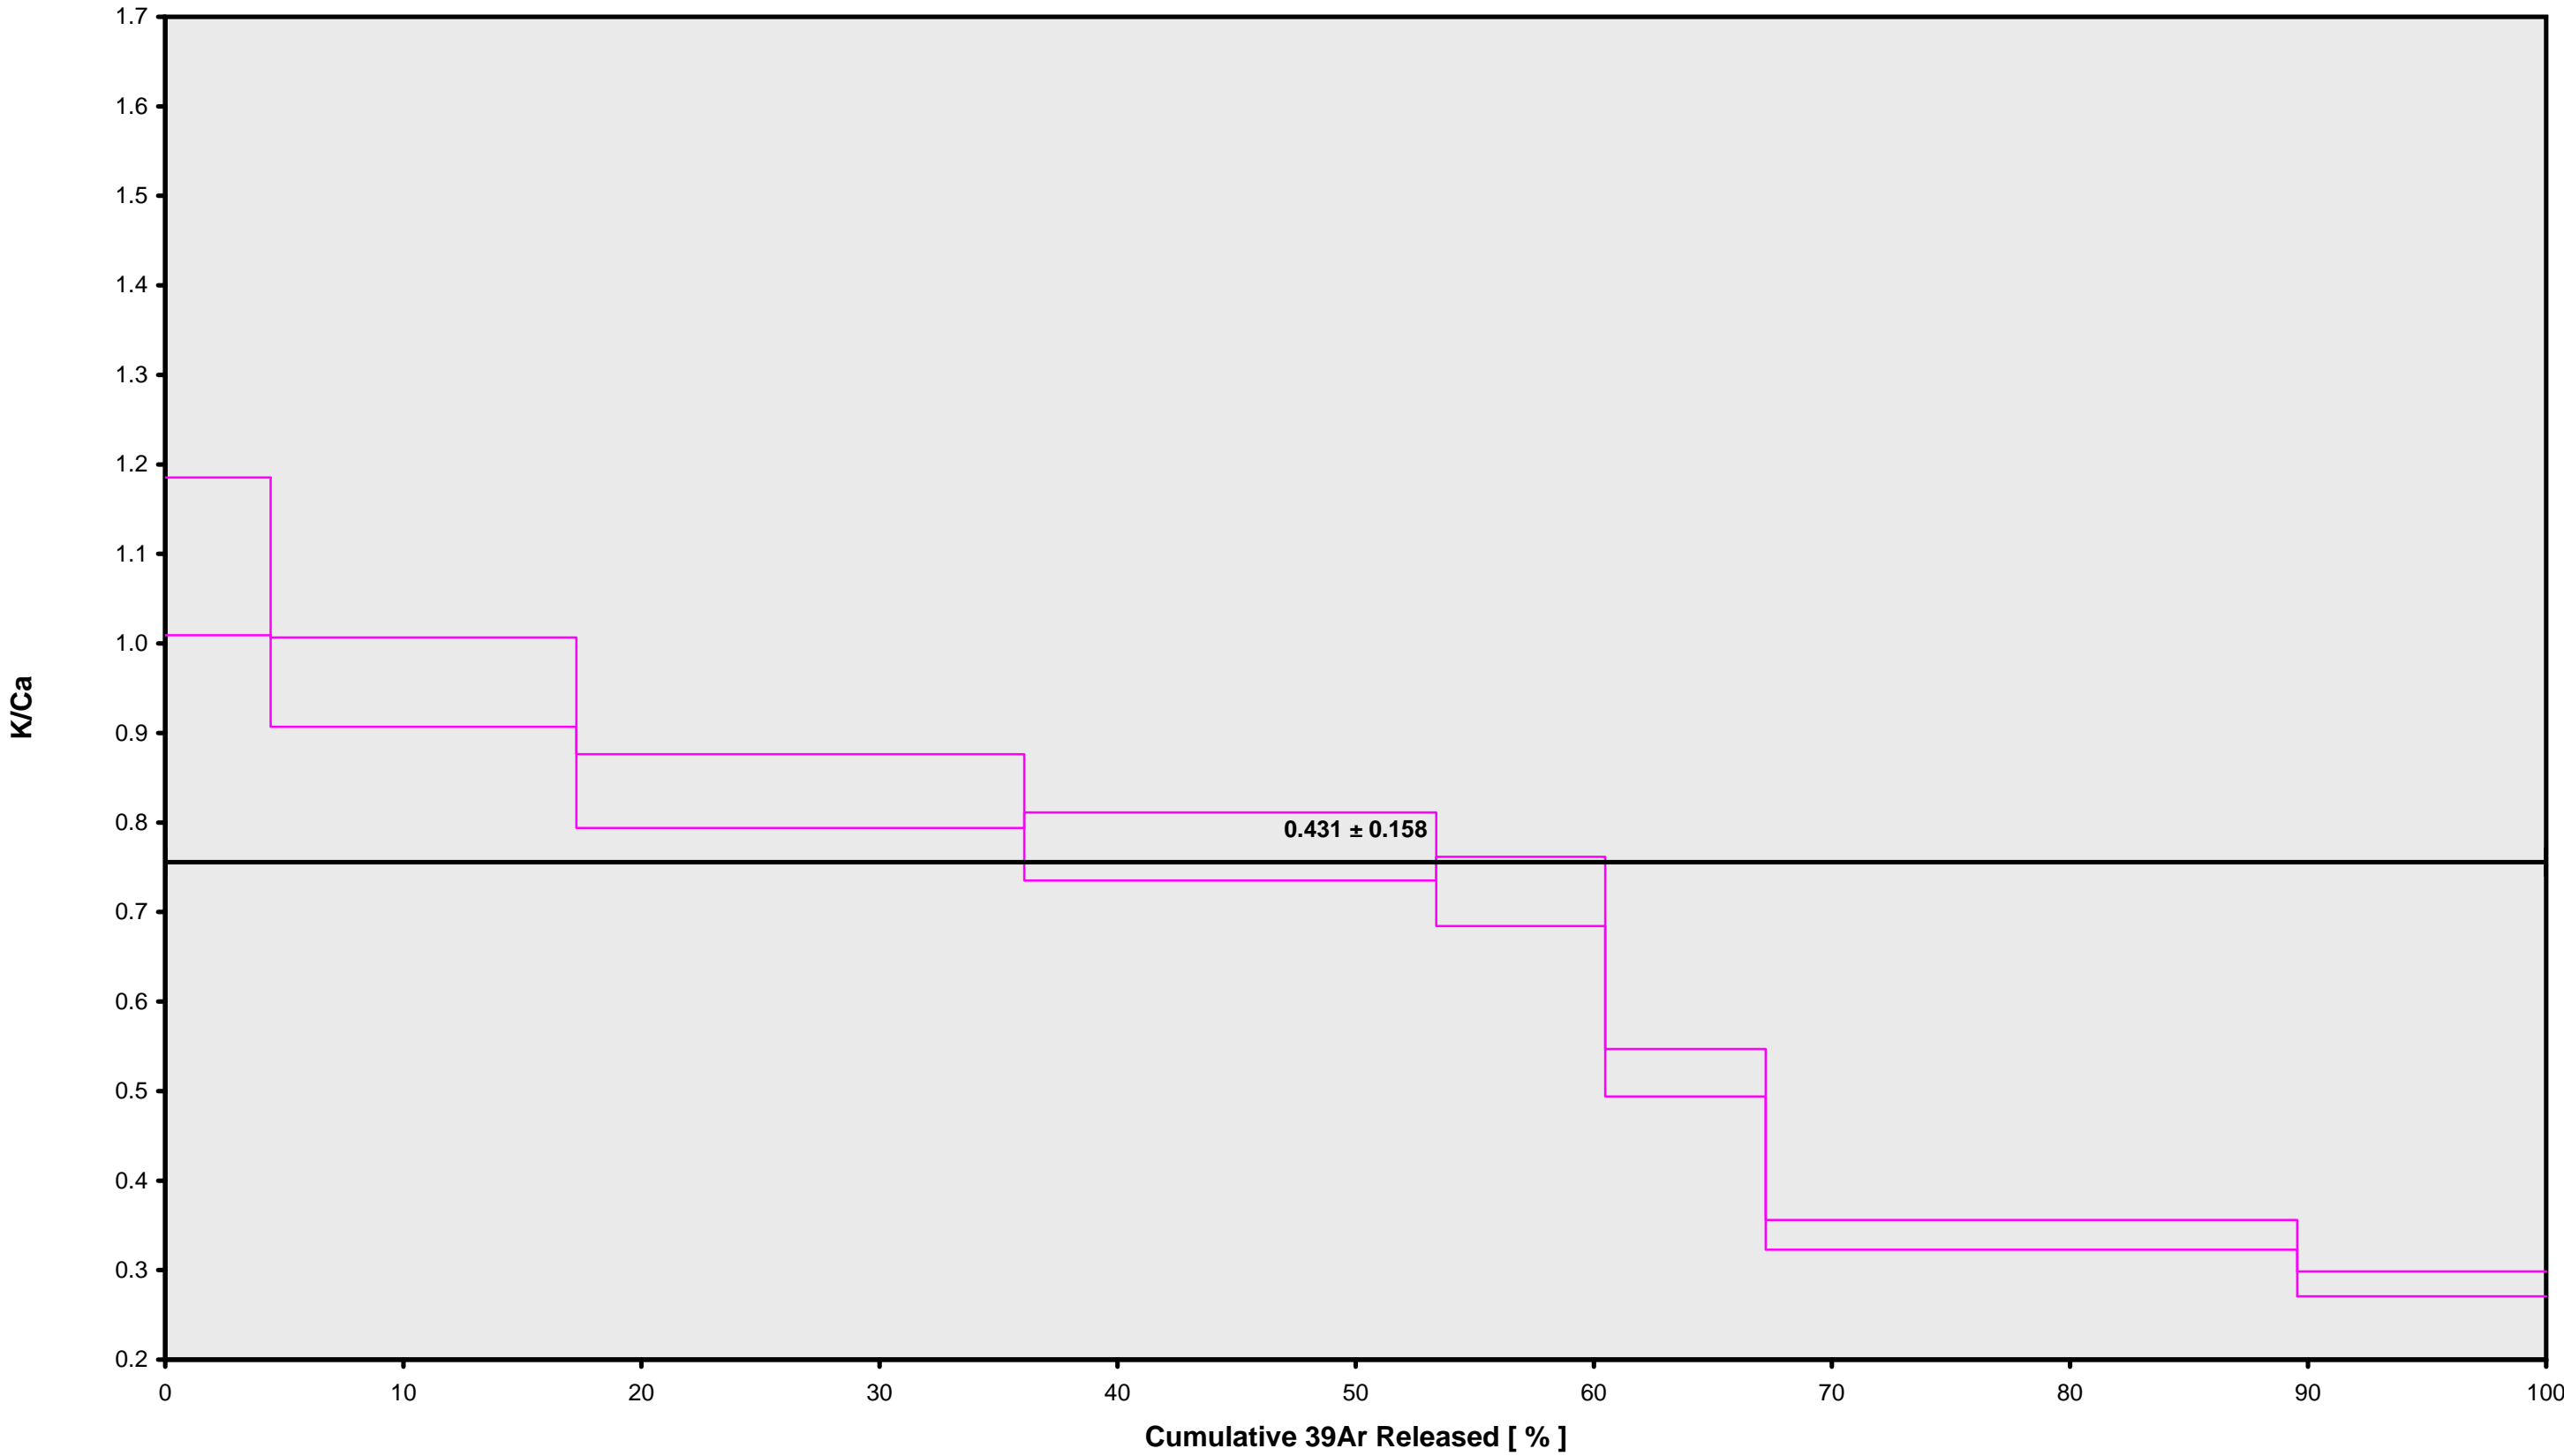

Ar-Ages in Ka

WEIGHTED PLATEAU

58.5 ± 169.9

TOTAL FUSION

98.9 ± 187.7

NORMAL ISOCHRON

209.3 ± 313.0

INVERSE ISOCHRON

214.5 ± 175.4

Sample Info

Groundmass

Kerguelen Plateau

Kyle Krawl

IRR = OSU2C13

J = 0.00146860 ± 0.00000405

RECALIBRATED AGE



13C2177.AGE >>> 1180256-2 >>> KERGUELEN PROJECT

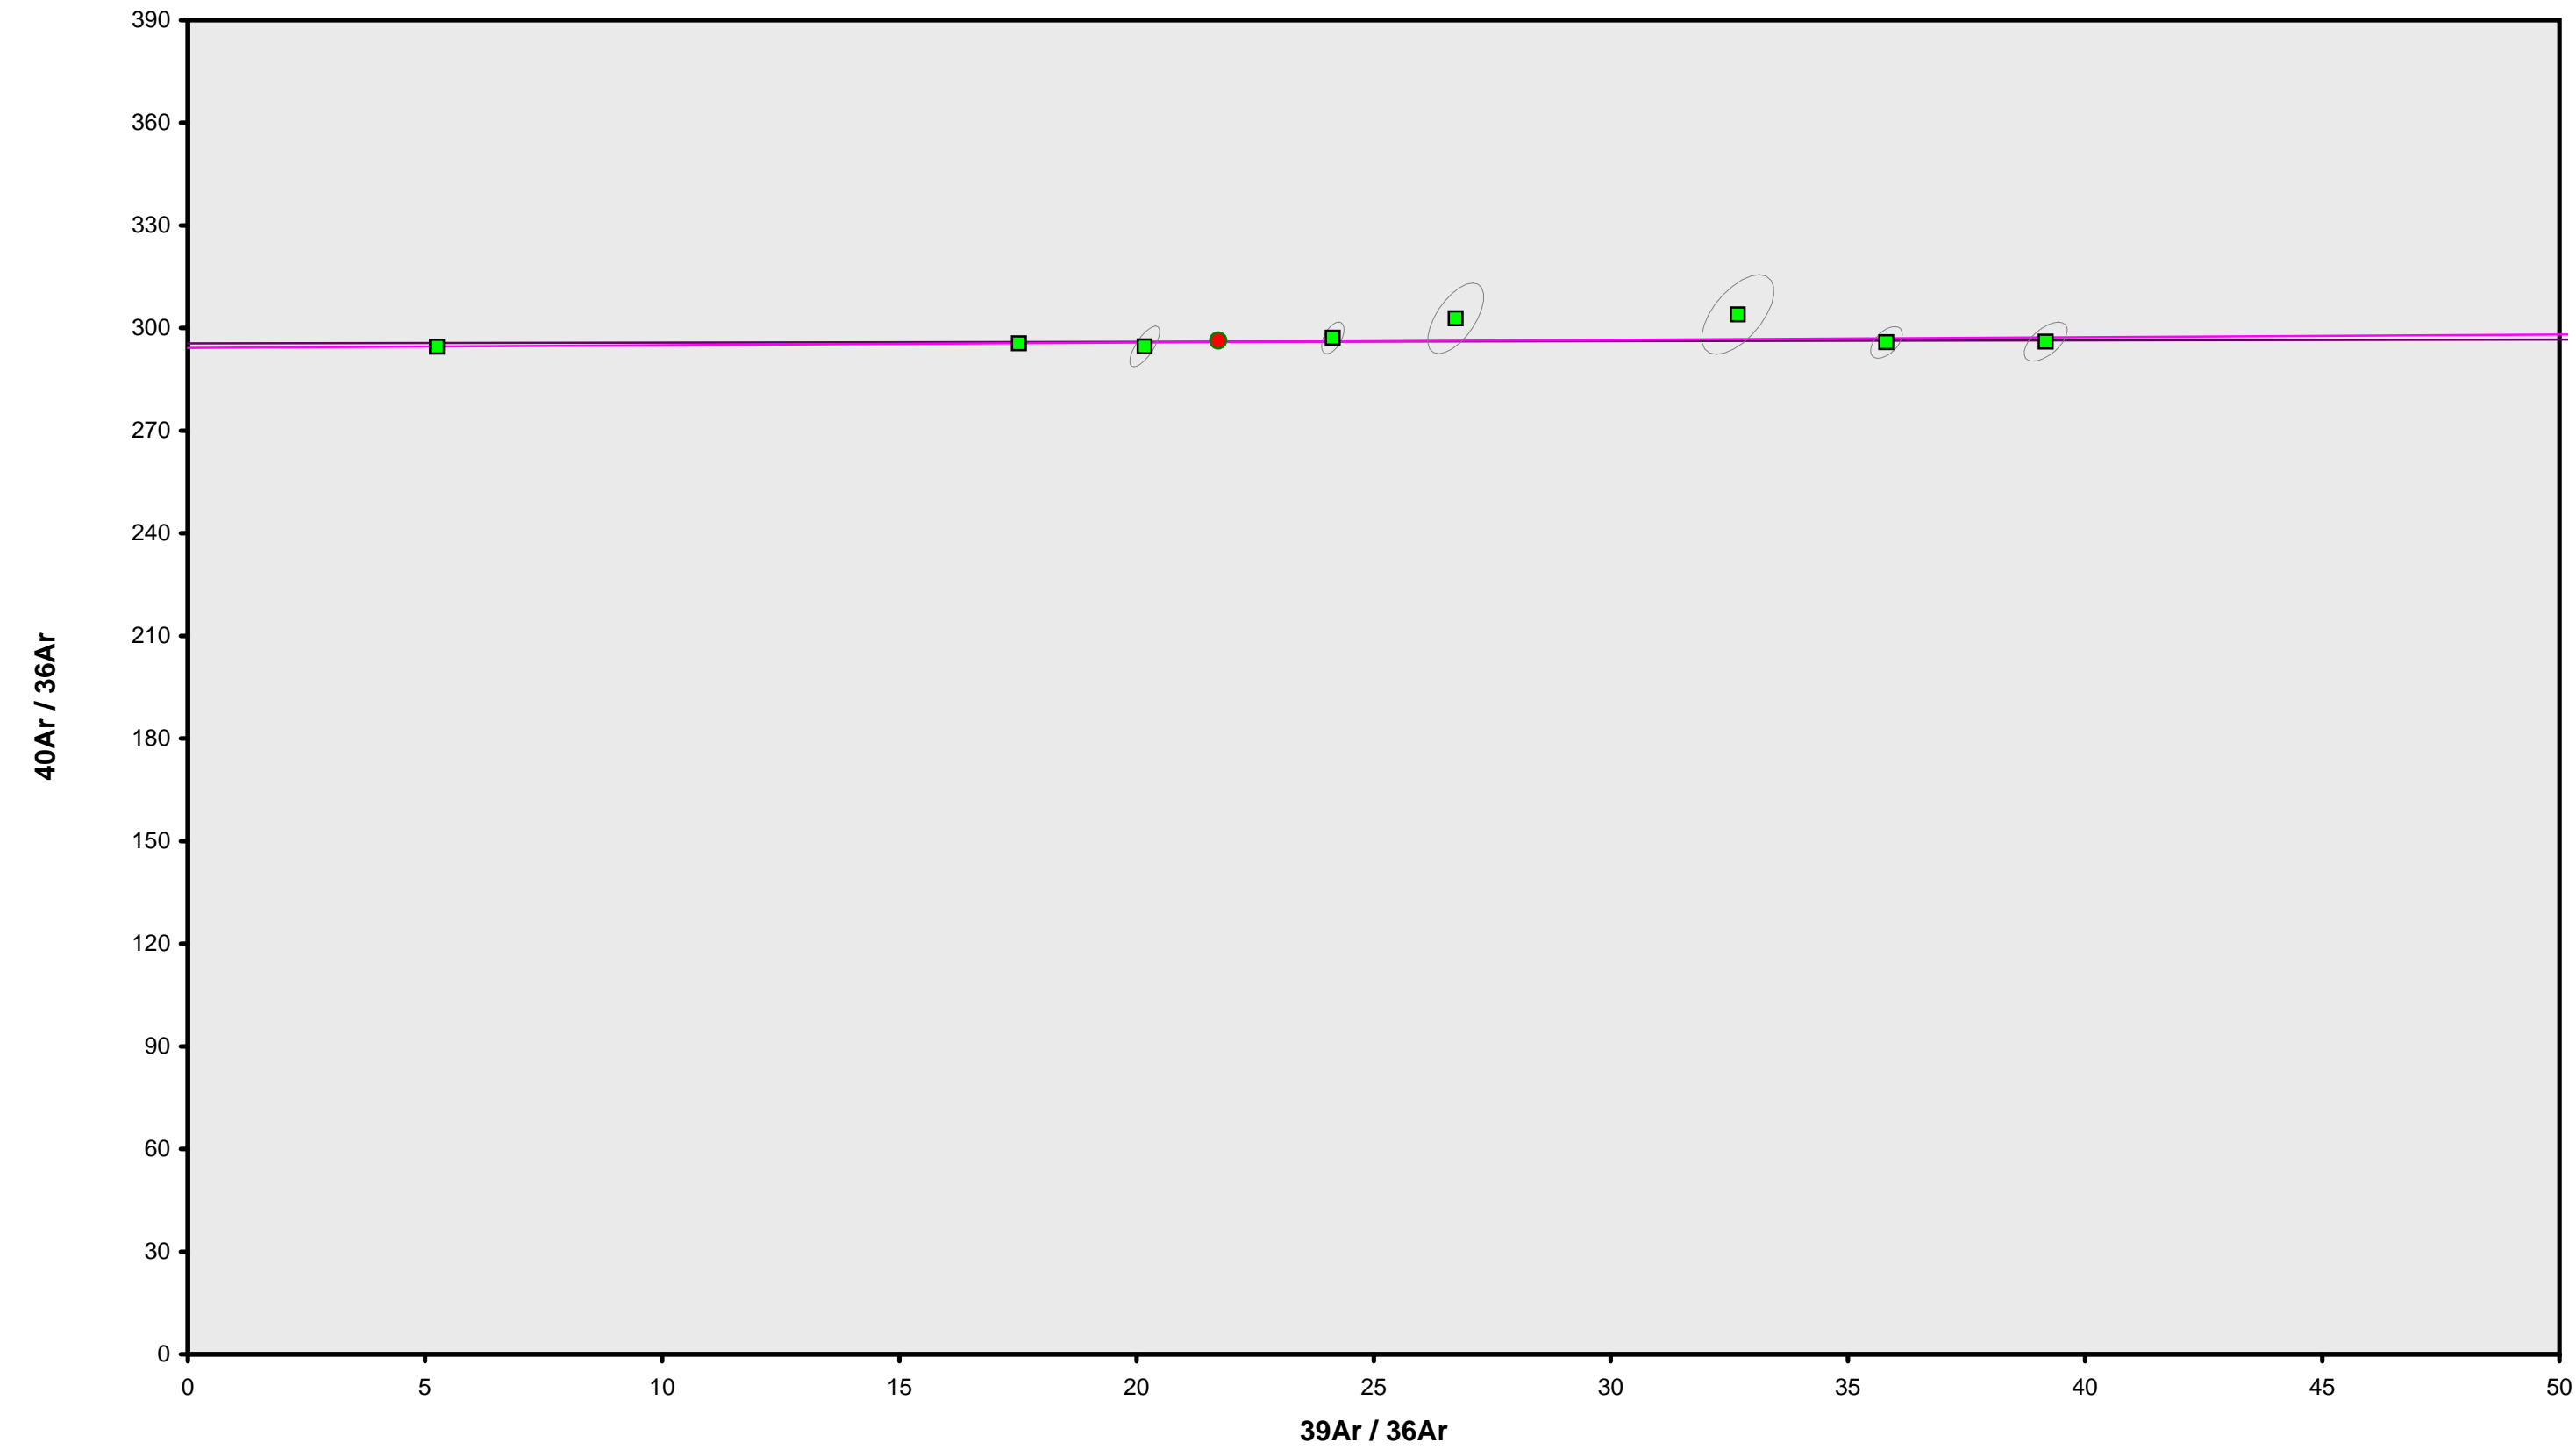

Ar-Ages in Ka

WEIGHTED PLATEAU

58.5 ± 169.9

TOTAL FUSION

98.9 ± 187.7

NORMAL ISOCHRON

209.3 ± 313.0

INVERSE ISOCHRON

214.5 ± 175.4

MSWD (PROBABILITY)

0.66 (68%)

40AR/36AR INTERCEPT

294.2 ± 2.3

Sample Info

Groundmass

Kerguelen Plateau

Kyle Krawl

IRR = OSU2C13

J = 0.00146860 ± 0.00000405

RECALIBRATED AGE



13C2177.AGE >>> 1180256-2 >>> KERGUELEN PROJECT

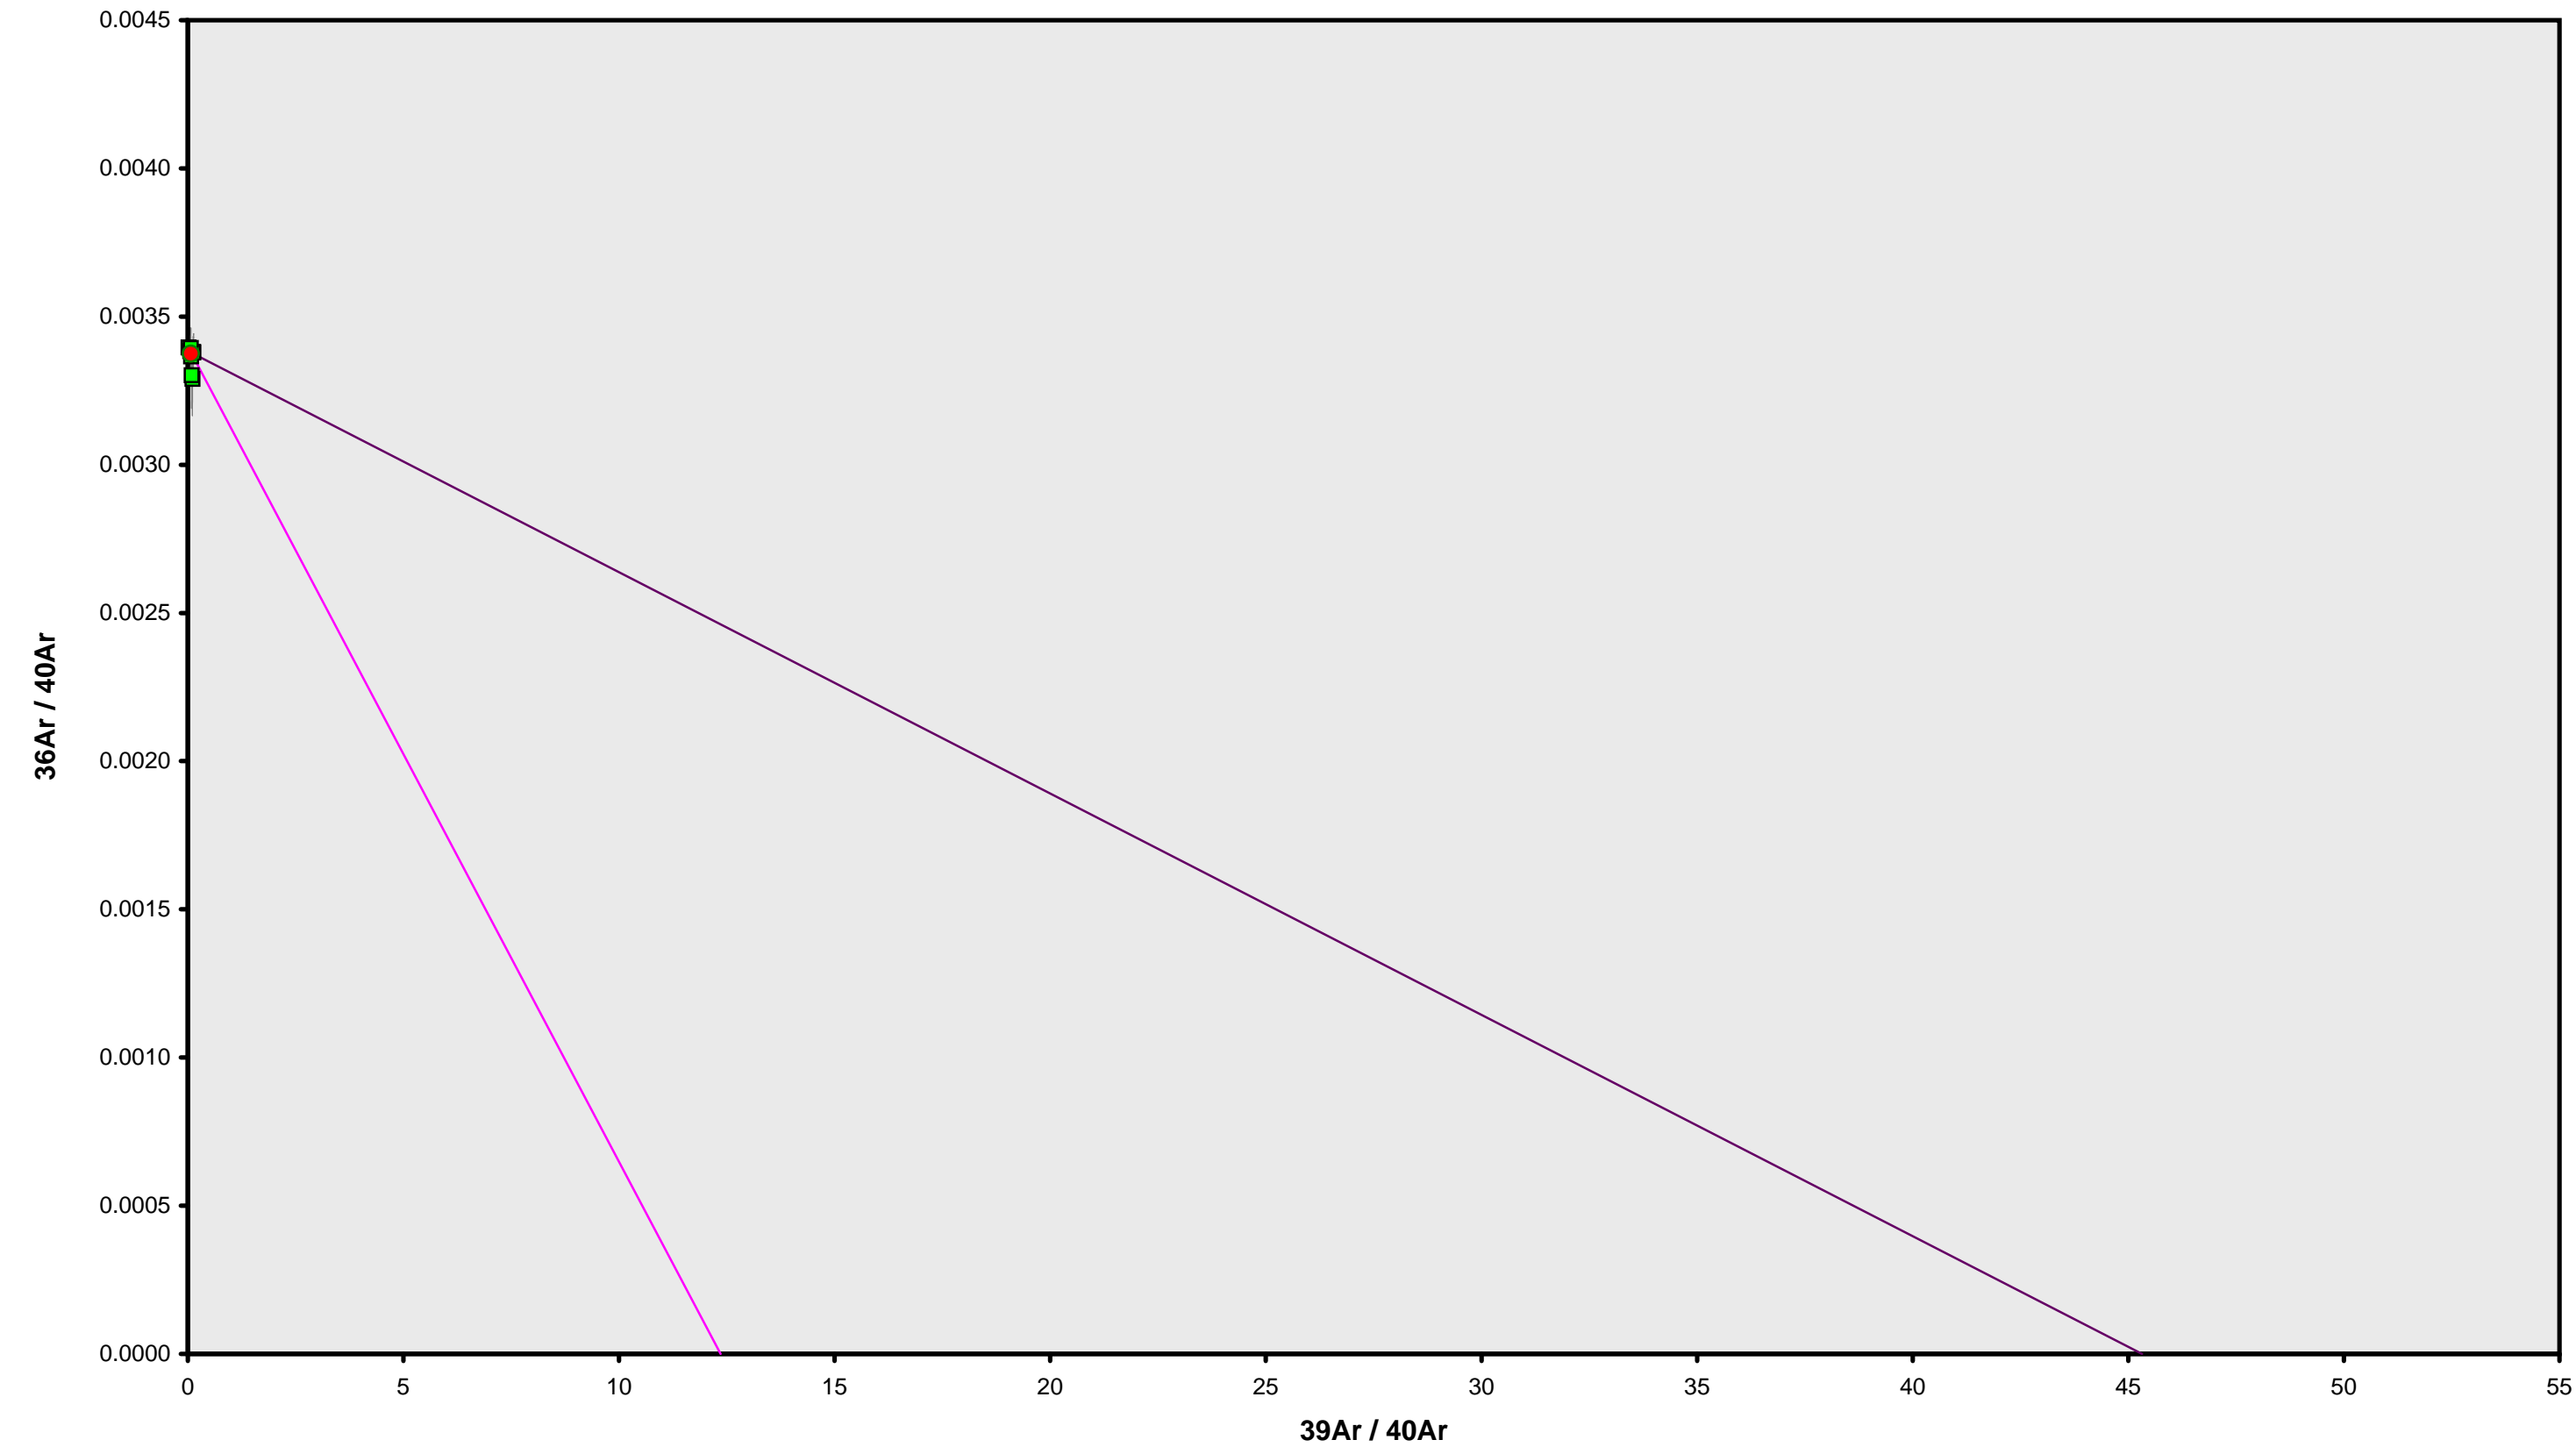

Ar-Ages in Ka

WEIGHTED PLATEAU

58.5 ± 169.9

TOTAL FUSION

98.9 ± 187.7

NORMAL ISOCHRON

209.3 ± 313.0

INVERSE ISOCHRON

214.5 ± 175.4

MSWD (PROBABILITY)

0.69 (66%)

SPREADING FACTOR

0.9%

40AR/36AR INTERCEPT

294.2 ± 2.3

Sample Info

Groundmass

Kerguelen Plateau

Kyle Krawl

IRR = OSU2C13

J = 0.00146860 ± 0.00000405

RECALIBRATED AGE



| Incremental Heating |         |   | 36Ar(a)<br>[V] | 37Ar(ca)<br>[V] | 38Ar(cl)<br>[V] | 39Ar(k)<br>[V] | 40Ar(r)<br>[V] | Age ± 2σ<br>(Ka) | 40Ar(r)<br>(%) | 39Ar(k)<br>(%) | K/Ca ± 2σ     |
|---------------------|---------|---|----------------|-----------------|-----------------|----------------|----------------|------------------|----------------|----------------|---------------|
| 13C2140             | 500 °C  | ✓ | 0.0023597      | 0.0073972       | 0.0009026       | 0.0204653      | 0.0124986      | 1640.2 ± 1973.2  | 1.76           | 2.17           | 1.190 ± 0.141 |
| 13C2142             | 600 °C  | ✓ | 0.0051358      | 0.0402875       | 0.0032424       | 0.0884058      | 0.0087948      | 267.3 ± 353.0    | 0.58           | 9.39           | 0.944 ± 0.046 |
| 13C2143             | 700 °C  | ✓ | 0.0036891      | 0.0630550       | 0.0023263       | 0.1089006      | 0.0195893      | 483.3 ± 290.8    | 1.77           | 11.57          | 0.743 ± 0.035 |
| 13C2145             | 800 °C  | ✓ | 0.0031319      | 0.0812798       | 0.0015899       | 0.1319963      | 0.0325666      | 662.8 ± 187.6    | 3.40           | 14.02          | 0.698 ± 0.033 |
| 13C2146             | 900 °C  | ✓ | 0.0022355      | 0.0581027       | 0.0006158       | 0.0902362      | 0.0186371      | 554.9 ± 322.1    | 2.74           | 9.59           | 0.668 ± 0.032 |
| 13C2148             | 1050 °C | ✓ | 0.0055257      | 0.1029696       | 0.0010868       | 0.1346617      | 0.0226940      | 452.8 ± 240.7    | 1.37           | 14.31          | 0.562 ± 0.026 |
| 13C2149             | 1250 °C | ✓ | 0.0143987      | 0.2675053       | 0.0022006       | 0.2525444      | 0.0597647      | 635.8 ± 187.0    | 1.39           | 26.83          | 0.406 ± 0.019 |
| 13C2151             | 1400 °C |   | 0.0051756      | 0.1359157       | 0.0007940       | 0.1141005      | 0.0208530      | 491.1 ± 298.9    | 1.38           | 12.12          | 0.361 ± 0.017 |

|  |   |  |           |           |           |           |           |  |  |  |  |
|--|---|--|-----------|-----------|-----------|-----------|-----------|--|--|--|--|
|  | Σ |  | 0.0416521 | 0.7565128 | 0.0127583 | 0.9413108 | 0.1536922 |  |  |  |  |
|--|---|--|-----------|-----------|-----------|-----------|-----------|--|--|--|--|

| Information on Analysis       | Results          | 40(r)/39(k) ± 2σ  | Age ± 2σ<br>(Ka)            | MSWD   | 39Ar(k)<br>(%,n)    | K/Ca ± 2σ     |
|-------------------------------|------------------|-------------------|-----------------------------|--------|---------------------|---------------|
| Sample = 1180051-2            | Age Plateau      | 0.20919 ± 0.03908 | 562.0 ± 105.0               | 1.15   | 87.88               |               |
| Material = Groundmass         | Recalibrated     | ± 18.68%          | ± 18.69%                    | 33%    | 7                   | 0.583 ± 0.136 |
| Location = Kerguelen Plateau  |                  |                   | Full External Error ± 105.8 | 2.15   | 2σ Confidence Limit |               |
| Analyst = Trevor Smith        |                  |                   | Analytical Error ± 105.0    | 1.0707 | Error Magnification |               |
| Project = KERGUELEN           |                  |                   |                             |        |                     |               |
| Mass Discrimination Law = LIN | Total Fusion Age | 0.16327 ± 0.03857 | 438.7 ± 103.6               |        | 8                   | 0.535 ± 0.011 |
| Irradiation = OSU2C13         | Recalibrated     | ± 23.62%          | ± 23.62%                    |        |                     |               |
| J = 0.00148940 ± 0.00000405   |                  |                   | Full External Error ± 104.1 |        |                     |               |
| FCT-3 = 28.201 ± 0.023 Ma     |                  |                   | Analytical Error ± 103.6    |        |                     |               |



| Normal Isochron |         |   | 39(k)/36(a) ± 2σ | 40(a+r)/36(a) ± 2σ | r.i.   |
|-----------------|---------|---|------------------|--------------------|--------|
| 13C2140         | 500 °C  | ✓ | 8.67 ± 0.19      | 300.80 ± 6.49      | 0.9531 |
| 13C2142         | 600 °C  | ✓ | 17.21 ± 0.14     | 297.21 ± 2.27      | 0.9275 |
| 13C2143         | 700 °C  | ✓ | 29.52 ± 0.33     | 300.81 ± 3.25      | 0.9421 |
| 13C2145         | 800 °C  | ✓ | 42.15 ± 0.43     | 305.90 ± 3.04      | 0.9476 |
| 13C2146         | 900 °C  | ✓ | 40.36 ± 0.66     | 303.84 ± 4.98      | 0.9891 |
| 13C2148         | 1050 °C | ✓ | 24.37 ± 0.19     | 299.61 ± 2.21      | 0.9532 |
| 13C2149         | 1250 °C | ✓ | 17.54 ± 0.07     | 299.65 ± 1.24      | 0.9619 |
| 13C2151         | 1400 °C |   | 22.05 ± 0.19     | 291.47 ± 2.42      | 0.9117 |

| Results                         | 40(a)/36(a) ± 2σ                                                    | 40(r)/39(k) ± 2σ              | Age ± 2σ (Ka)                                           | MSWD                                   |
|---------------------------------|---------------------------------------------------------------------|-------------------------------|---------------------------------------------------------|----------------------------------------|
| Normal Isochron<br>Recalibrated | 295.05 ± 2.88<br>± 0.98%                                            | 0.22657 ± 0.12249<br>± 54.06% | 608.7 ± 329.0<br>± 54.06%                               | 1.35                                   |
|                                 |                                                                     |                               | Full External Error ± 329.3<br>Analytical Error ± 329.0 | 24%                                    |
| Statistics                      | 2σ Confidence Limit<br>Error Magnification<br>Number of Data Points | 2.26<br>1.1620<br>7           | Convergence<br>Number of Iterations<br>Calculated Line  | 0.000000002120<br>6<br>Weighted York-2 |



| Inverse Isochron |         | 39(k)/40(a+r) ± 2σ |                       | 36(a)/40(a+r) ± 2σ      | r.i.   |
|------------------|---------|--------------------|-----------------------|-------------------------|--------|
| 13C2140          | 500 °C  | ✓                  | 0.0288328 ± 0.0001945 | 0.00332450 ± 0.00007170 | 0.0514 |
| 13C2142          | 600 °C  | ✓                  | 0.0579173 ± 0.0001743 | 0.00336460 ± 0.00002575 | 0.0678 |
| 13C2143          | 700 °C  | ✓                  | 0.0981343 ± 0.0003713 | 0.00332436 ± 0.00003594 | 0.0531 |
| 13C2145          | 800 °C  | ✓                  | 0.1377756 ± 0.0004484 | 0.00326906 ± 0.00003252 | 0.1092 |
| 13C2146          | 900 °C  | ✓                  | 0.1328497 ± 0.0003228 | 0.00329124 ± 0.00005390 | 0.0361 |
| 13C2148          | 1050 °C | ✓                  | 0.0813401 ± 0.0001895 | 0.00333771 ± 0.00002466 | 0.0200 |
| 13C2149          | 1250 °C | ✓                  | 0.0585327 ± 0.0000665 | 0.00333722 ± 0.00001378 | 0.1659 |
| 13C2151          | 1400 °C |                    | 0.0756358 ± 0.0002723 | 0.00343087 ± 0.00002849 | 0.0977 |

| Results          | 40(a)/36(a) ± 2σ      |        | 40(r)/39(k) ± 2σ     |                     | Age ± 2σ<br>(Ka) | MSWD |
|------------------|-----------------------|--------|----------------------|---------------------|------------------|------|
| Inverse Isochron | 295.07 ± 2.88         |        | 0.22616 ± 0.10419    |                     | 607.6 ± 279.9    | 1.35 |
| Clustered Points | ± 0.97%               |        | ± 46.07%             |                     | ± 46.07%         | 24%  |
|                  |                       |        |                      | Full External Error | ± 280.2          |      |
|                  |                       |        |                      | Analytical Error    | ± 279.9          |      |
| Statistics       | 2σ Confidence Limit   | 2.26   | Convergence          |                     | 0.0000008188     |      |
|                  | Error Magnification   | 1.1628 | Number of Iterations |                     | 4                |      |
|                  | Number of Data Points | 7      | Calculated Line      |                     | Weighted York-2  |      |
|                  | Spreading Factor      | 2.5%   |                      |                     |                  |      |



| OSU Argon Geochronology Lab |         |   |           |           |           |           |           |           |           |           |           |           |                   |                 |             |             |               |
|-----------------------------|---------|---|-----------|-----------|-----------|-----------|-----------|-----------|-----------|-----------|-----------|-----------|-------------------|-----------------|-------------|-------------|---------------|
| Relative Abundances         |         |   | 40Ar [V]  | 1σ        | 39Ar [V]  | 1σ        | 38Ar [V]  | 1σ        | 37Ar [V]  | 1σ        | 36Ar [V]  | 1σ        | 40(r)/39(k) ± 2σ  | Age ± 2σ (Ka)   | 40Ar(r) (%) | 39Ar(k) (%) | K/Ca ± 2σ     |
| 13C2140                     | 500 °C  | ✓ | 0.709812  | 0.0009710 | 0.0204703 | 0.0000631 | 0.0015775 | 0.0000265 | 0.0073972 | 0.0004364 | 0.0023619 | 0.0000252 | 0.61072 ± 0.73502 | 1640.2 ± 1973.2 | 1.76        | 2.17        | 1.190 ± 0.141 |
| 13C2142                     | 600 °C  | ✓ | 1.526505  | 0.0009538 | 0.0884330 | 0.0001210 | 0.0052140 | 0.0000367 | 0.0402875 | 0.0009894 | 0.0051471 | 0.0000194 | 0.09948 ± 0.13141 | 267.3 ± 353.0   | 0.58        | 9.39        | 0.944 ± 0.046 |
| 13C2143                     | 700 °C  | ✓ | 1.109819  | 0.0008179 | 0.1089430 | 0.0001897 | 0.0042638 | 0.0000391 | 0.0630550 | 0.0014873 | 0.0037062 | 0.0000198 | 0.17988 ± 0.10826 | 483.3 ± 290.8   | 1.77        | 11.57       | 0.743 ± 0.035 |
| 13C2145                     | 800 °C  | ✓ | 0.958186  | 0.0009007 | 0.1320510 | 0.0001753 | 0.0036887 | 0.0000276 | 0.0812798 | 0.0018911 | 0.0031537 | 0.0000153 | 0.24672 ± 0.06983 | 662.8 ± 187.6   | 3.40        | 14.02       | 0.698 ± 0.033 |
| 13C2146                     | 900 °C  | ✓ | 0.679327  | 0.0004072 | 0.0902753 | 0.0000954 | 0.0020685 | 0.0000330 | 0.0581027 | 0.0013809 | 0.0022510 | 0.0000183 | 0.20654 ± 0.11990 | 554.9 ± 322.1   | 2.74        | 9.59        | 0.668 ± 0.032 |
| 13C2148                     | 1050 °C | ✓ | 1.655674  | 0.0004853 | 0.1347310 | 0.0001518 | 0.0036663 | 0.0000286 | 0.1029696 | 0.0023799 | 0.0055531 | 0.0000203 | 0.16853 ± 0.08959 | 452.8 ± 240.7   | 1.37        | 14.31       | 0.562 ± 0.026 |
| 13C2149                     | 1250 °C | ✓ | 4.314840  | 0.0019033 | 0.2527244 | 0.0000903 | 0.0078029 | 0.0000319 | 0.2675053 | 0.0062645 | 0.0144698 | 0.0000290 | 0.23665 ± 0.06960 | 635.8 ± 187.0   | 1.39        | 26.83       | 0.406 ± 0.019 |
| 13C2151                     | 1400 °C |   | 1.508667  | 0.0012888 | 0.1141919 | 0.0001807 | 0.0030787 | 0.0000418 | 0.1359157 | 0.0031419 | 0.0052117 | 0.0000210 | 0.18276 ± 0.11123 | 491.1 ± 298.9   | 1.38        | 12.12       | 0.361 ± 0.017 |
| Σ                           |         |   | 12.462829 | 0.0030030 | 0.9418199 | 0.0003979 | 0.0313604 | 0.0000949 | 0.7565128 | 0.0079777 | 0.0418546 | 0.0000605 |                   |                 |             |             |               |

| Information on Analysis and Constants Used in Calculations |                                                                 | Results               |                            |                             |              |                      |               |  |
|------------------------------------------------------------|-----------------------------------------------------------------|-----------------------|----------------------------|-----------------------------|--------------|----------------------|---------------|--|
|                                                            |                                                                 | 40(a)/36(a) ± 2σ      | 40(r)/39(k) ± 2σ           | Age ± 2σ (Ka)               | MSWD         | 39Ar(k) (%.n)        | K/Ca ± 2σ     |  |
| Sample = 1180051-2                                         | Age Equations = Min et al. (2000)                               |                       |                            |                             |              |                      |               |  |
| Material = Groundmass                                      | Negative Intensities = Allowed                                  |                       |                            |                             |              |                      |               |  |
| Location = Kerguelen Plateau                               | Decay Constant 40K = 5.543 ± 0.044 E-10 1/a                     |                       | 0.20919 ± 0.03908 ± 18.68% | 562.0 ± 105.0 ± 18.69%      | 1.15 33%     | 87.88 7              | 0.583 ± 0.136 |  |
| Analyst = Trevor Smith                                     | Decay Constant 39Ar = 2.940 ± 0.029 E-07 1/h                    |                       |                            | Full External Error ± 105.8 | 2.15         | 2σ Confidence Limit  |               |  |
| Project = KERGUELEN                                        | Decay Constant 37Ar = 8.230 ± 0.082 E-04 1/h                    |                       |                            | Analytical Error ± 105.0    | 1.0707       | Error Magnification  |               |  |
| Mass Discrimination Law = LIN                              | Decay Constant 36Cl = 2.236 ± 0.045 E-06 1/a                    |                       |                            |                             |              |                      |               |  |
| Irradiation = OSU2C13                                      | Decay Constant 40K(EC,β <sup>+</sup> ) = 0.580 ± 0.009 E-10 1/a |                       | 0.16327 ± 0.03857 ± 23.62% | 438.7 ± 103.6 ± 23.62%      |              | 8                    | 0.535 ± 0.011 |  |
| J = 0.00148940 ± 0.00000405                                | Decay Constant 40K(β <sup>-</sup> ) = 4.950 ± 0.043 E-10 1/a    |                       |                            | Full External Error ± 104.1 |              |                      |               |  |
| FCT-3 = 28.201 ± 0.023 Ma                                  | Atmospheric Ratio 40/36(a) = 295.50                             |                       |                            | Analytical Error ± 103.6    |              |                      |               |  |
| IGSN = Undefined                                           | Atmospheric Ratio 38/36(a) = 0.1869                             |                       |                            |                             |              |                      |               |  |
| Preferred Age = Undefined                                  | Production Ratio 39/37(ca) = 0.000673                           | 295.05 ± 2.88         | 0.22657 ± 0.12249 ± 54.06% | 608.7 ± 329.0 ± 54.06%      | 1.35 24%     | 87.88 7              |               |  |
| Classification = Undefined                                 | Production Ratio 38/37(ca) = 0.000139                           |                       |                            | Full External Error ± 329.3 | 2.26         | 2σ Confidence Limit  |               |  |
| Experiment Type = Undefined                                | Production Ratio 36/37(ca) = 0.000264                           |                       |                            | Analytical Error ± 329.0    | 1.1620       | Error Magnification  |               |  |
| Extraction Method = Undefined                              | Production Ratio 40/39(k) = 0.001010                            |                       |                            |                             | 6            | Number of Iterations |               |  |
| Heating = 0 sec                                            | Production Ratio 38/39(k) = 0.011380                            |                       |                            |                             | 0.0000000021 | Convergence          |               |  |
| Isolation = 15.00 min                                      | Production Ratio 36/38(cl) = 316.00 ± 15.80                     |                       |                            |                             |              |                      |               |  |
| Instrument = MAP215-50                                     | Scaling Ratio K/Ca = 0.430                                      |                       |                            |                             |              |                      |               |  |
| Lithology = Undefined                                      | Abundance Ratio 40K/K = 1.1700 ± 0.0199 E-04                    | 295.07 ± 2.88 ± 0.97% | 0.22616 ± 0.10419 ± 46.07% | 607.6 ± 279.9 ± 46.07%      | 1.35 24%     | 87.88 7              |               |  |
| Lat-Lon = Undefined - Undefined                            | Atomic Weight K = 39.0983 ± 0.0001 g                            |                       |                            | Full External Error ± 280.2 | 2.26         | 2σ Confidence Limit  |               |  |
| R1 ratio = Undefined                                       | Recalibrated to FCT-3 Secondary Standard                        |                       |                            | Analytical Error ± 279.9    | 1.1628       | Error Magnification  |               |  |
| R2 ratio = Undefined                                       | Standard Age = 28.201 ± 0.023 Ma                                |                       |                            |                             | 4            | Number of Iterations |               |  |
| R3 ratio = Undefined                                       |                                                                 |                       |                            |                             | 0.0000008188 | Convergence          |               |  |
| R4 ratio = Undefined                                       |                                                                 |                       |                            |                             | 2%           | Spreading Factor     |               |  |
| R5 ratio = Undefined                                       |                                                                 |                       |                            |                             |              |                      |               |  |
| Collector Calibrations =                                   |                                                                 |                       |                            |                             |              |                      |               |  |



| OSU Argon Geochronology Lab |         |         |                |           |                |           |                 |           |                 |           |                 |           |                |           |                |           |                |           |                 |           |                 |           |                |           |                 |           |                |           |                |           |                |           |                |           |      |
|-----------------------------|---------|---------|----------------|-----------|----------------|-----------|-----------------|-----------|-----------------|-----------|-----------------|-----------|----------------|-----------|----------------|-----------|----------------|-----------|-----------------|-----------|-----------------|-----------|----------------|-----------|-----------------|-----------|----------------|-----------|----------------|-----------|----------------|-----------|----------------|-----------|------|
| Degassing<br>Patterns       |         |         | 36Ar(a)<br>[V] | %1σ       | 36Ar(c)<br>[V] | %1σ       | 36Ar(ca)<br>[V] | %1σ       | 36Ar(cl)<br>[V] | %1σ       | 37Ar(ca)<br>[V] | %1σ       | 38Ar(a)<br>[V] | %1σ       | 38Ar(c)<br>[V] | %1σ       | 38Ar(k)<br>[V] | %1σ       | 38Ar(ca)<br>[V] | %1σ       | 38Ar(cl)<br>[V] | %1σ       | 39Ar(k)<br>[V] | %1σ       | 39Ar(ca)<br>[V] | %1σ       | 40Ar(r)<br>[V] | %1σ       | 40Ar(a)<br>[V] | %1σ       | 40Ar(c)<br>[V] | %1σ       | 40Ar(k)<br>[V] | %1σ       |      |
|                             | 13C2140 | 500 °C  | ✓              | 0.0023597 | 1.07           | 0.0000000 | 0.00            | 0.0000020 | 5.90            | 0.0000002 | 6.16            | 0.0073972 | 5.90           | 0.0004410 | 1.07           | 0.0000000 | 0.00           | 0.0002329 | 0.31            | 0.0000010 | 5.90            | 0.0009026 | 8.18           | 0.0204653 | 0.31            | 0.0000050 | 5.90           | 0.0124986 | 60.18          | 0.697293  | 1.07           | 0.0000000 | 0.00           | 0.0000207 | 0.31 |
|                             | 13C2142 | 600 °C  | ✓              | 0.0051358 | 0.38           | 0.0000000 | 0.00            | 0.0000106 | 2.46            | 0.0000007 | 5.50            | 0.0402875 | 2.46           | 0.0009599 | 0.38           | 0.0000000 | 0.00           | 0.0010061 | 0.14            | 0.0000056 | 2.46            | 0.0032424 | 7.70           | 0.0884058 | 0.14            | 0.0000271 | 2.46           | 0.0087948 | 66.05          | 1.517621  | 0.38           | 0.0000000 | 0.00           | 0.0000893 | 0.14 |
|                             | 13C2143 | 700 °C  | ✓              | 0.0036891 | 0.54           | 0.0000000 | 0.00            | 0.0000166 | 2.36            | 0.0000005 | 5.65            | 0.0630550 | 2.36           | 0.0006895 | 0.54           | 0.0000000 | 0.00           | 0.0012393 | 0.17            | 0.0000088 | 2.36            | 0.0023263 | 7.80           | 0.1089006 | 0.17            | 0.0000424 | 2.36           | 0.0195893 | 30.09          | 1.090120  | 0.54           | 0.0000000 | 0.00           | 0.0001100 | 0.17 |
|                             | 13C2145 | 800 °C  | ✓              | 0.0031319 | 0.49           | 0.0000000 | 0.00            | 0.0000215 | 2.33            | 0.0000004 | 5.66            | 0.0812798 | 2.33           | 0.0005854 | 0.49           | 0.0000000 | 0.00           | 0.0015021 | 0.13            | 0.0000113 | 2.33            | 0.0015899 | 7.81           | 0.1319963 | 0.13            | 0.0000547 | 2.33           | 0.0325666 | 14.15          | 0.925486  | 0.49           | 0.0000000 | 0.00           | 0.0001333 | 0.13 |
|                             | 13C2146 | 900 °C  | ✓              | 0.0022355 | 0.82           | 0.0000000 | 0.00            | 0.0000153 | 2.38            | 0.0000001 | 7.62            | 0.0581027 | 2.38           | 0.0004178 | 0.82           | 0.0000000 | 0.00           | 0.0010269 | 0.11            | 0.0000081 | 2.38            | 0.0006158 | 9.33           | 0.0902362 | 0.11            | 0.0000391 | 2.38           | 0.0186371 | 29.03          | 0.660598  | 0.82           | 0.0000000 | 0.00           | 0.0000911 | 0.11 |
|                             | 13C2148 | 1050 °C | ✓              | 0.0055257 | 0.37           | 0.0000000 | 0.00            | 0.0000272 | 2.31            | 0.0000002 | 6.00            | 0.1029696 | 2.31           | 0.0010328 | 0.37           | 0.0000000 | 0.00           | 0.0015325 | 0.11            | 0.0000143 | 2.31            | 0.0010868 | 8.07           | 0.1346617 | 0.11            | 0.0000693 | 2.31           | 0.0226940 | 26.58          | 1.632844  | 0.37           | 0.0000000 | 0.00           | 0.0001360 | 0.11 |
|                             | 13C2149 | 1250 °C | ✓              | 0.0143987 | 0.20           | 0.0000000 | 0.00            | 0.0000706 | 2.34            | 0.0000005 | 5.58            | 0.2675053 | 2.34           | 0.0026911 | 0.20           | 0.0000000 | 0.00           | 0.0028740 | 0.04            | 0.0000372 | 2.34            | 0.0022006 | 7.76           | 0.2525444 | 0.04            | 0.0001800 | 2.34           | 0.0597647 | 14.71          | 4.254820  | 0.20           | 0.0000000 | 0.00           | 0.0002551 | 0.04 |
|                             | 13C2151 | 1400 °C |                | 0.0051756 | 0.41           | 0.0000000 | 0.00            | 0.0000359 | 2.31            | 0.0000002 | 7.55            | 0.1359157 | 2.31           | 0.0009673 | 0.41           | 0.0000000 | 0.00           | 0.0012985 | 0.16            | 0.0000189 | 2.31            | 0.0007940 | 9.27           | 0.1141005 | 0.16            | 0.0000915 | 2.31           | 0.0208530 | 30.43          | 1.529404  | 0.41           | 0.0000000 | 0.00           | 0.0001152 | 0.16 |
|                             |         | Σ       |                | 0.0416521 | 0.15           | 0.0000000 | 0.00            | 0.0001997 | 1.05            | 0.0000029 | 2.29            | 0.7565128 | 1.05           | 0.0077848 | 0.15           | 0.0000000 | 0.00           | 0.0107121 | 0.04            | 0.0001052 | 1.05            | 0.0127583 | 3.15           | 0.9413108 | 0.04            | 0.0005091 | 1.05           | 0.1536922 | 11.81          | 12.308187 | 0.15           | 0.0000000 | 0.00           | 0.0009507 | 0.04 |
|                             |         | Σ       |                |           |                |           |                 |           |                 |           | 0.0418546       | 0.14      | 0.7565128      | 1.05      |                |           |                |           |                 |           |                 | 0.0313604 | 1.28           |           |                 | 0.9418199 | 0.04           |           |                |           |                |           |                | 12.462829 | 0.20 |



| Additional Parameters |         |   | 40Ar/39Ar | 1σ       | 37Ar/39Ar | 1σ       | 36Ar/39Ar | 1σ       | Time (days) | 37Ar (decay) | 39Ar (decay) | 40Ar (moles) |
|-----------------------|---------|---|-----------|----------|-----------|----------|-----------|----------|-------------|--------------|--------------|--------------|
| 13C2140               | 500 °C  | ✓ | 34.675276 | 0.116956 | 0.361365  | 0.021348 | 0.115380  | 0.001283 | 115.658     | 9.844879     | 1.00081730   | 1.420E-13    |
| 13C2142               | 600 °C  | ✓ | 17.261718 | 0.025968 | 0.455571  | 0.011205 | 0.058204  | 0.000233 | 115.693     | 9.851633     | 1.00081755   | 3.053E-13    |
| 13C2143               | 700 °C  | ✓ | 10.187154 | 0.019265 | 0.578789  | 0.013689 | 0.034020  | 0.000191 | 115.711     | 9.855147     | 1.00081767   | 2.220E-13    |
| 13C2145               | 800 °C  | ✓ | 7.256181  | 0.011803 | 0.615519  | 0.014344 | 0.023883  | 0.000120 | 115.748     | 9.862314     | 1.00081793   | 1.916E-13    |
| 13C2146               | 900 °C  | ✓ | 7.525054  | 0.009140 | 0.643616  | 0.015312 | 0.024935  | 0.000204 | 115.767     | 9.866103     | 1.00081807   | 1.359E-13    |
| 13C2148               | 1050 °C | ✓ | 12.288740 | 0.014305 | 0.764261  | 0.017685 | 0.041216  | 0.000158 | 115.803     | 9.873142     | 1.00081833   | 3.311E-13    |
| 13C2149               | 1250 °C | ✓ | 17.073299 | 0.009692 | 1.058486  | 0.024791 | 0.057255  | 0.000117 | 115.821     | 9.876529     | 1.00081845   | 8.630E-13    |
| 13C2151               | 1400 °C |   | 13.211673 | 0.023762 | 1.190239  | 0.027578 | 0.045640  | 0.000198 | 115.856     | 9.883304     | 1.00081869   | 3.017E-13    |



| Procedure<br>Blanks |         | 36Ar<br>[V] | 1σ        | 37Ar<br>[V] | 1σ        | 38Ar<br>[V] | 1σ        | 39Ar<br>[V] | 1σ        | 40Ar<br>[V] | 1σ        |
|---------------------|---------|-------------|-----------|-------------|-----------|-------------|-----------|-------------|-----------|-------------|-----------|
| 13C2140             | 500 °C  | 0.0002718   | 0.0000209 | 0.0000266   | 0.0000111 | 0.0000194   | 0.0000154 | 0.0000020   | 0.0000209 | 0.0006895   | 0.0000511 |
| 13C2142             | 600 °C  | 0.0003561   | 0.0000063 | 0.0000168   | 0.0000250 | 0.0000231   | 0.0000174 | 0.0000561   | 0.0000181 | 0.0092833   | 0.0000333 |
| 13C2143             | 700 °C  | 0.0003561   | 0.0000063 | 0.0000168   | 0.0000250 | 0.0000231   | 0.0000174 | 0.0000561   | 0.0000181 | 0.0092833   | 0.0000333 |
| 13C2145             | 800 °C  | 0.0003561   | 0.0000063 | 0.0000168   | 0.0000250 | 0.0000231   | 0.0000174 | 0.0000561   | 0.0000181 | 0.0092833   | 0.0000333 |
| 13C2146             | 900 °C  | 0.0003561   | 0.0000063 | 0.0000168   | 0.0000250 | 0.0000231   | 0.0000174 | 0.0000561   | 0.0000181 | 0.0092833   | 0.0000333 |
| 13C2148             | 1050 °C | 0.0003561   | 0.0000086 | 0.0000977   | 0.0000199 | 0.0000373   | 0.0000205 | 0.0000958   | 0.0000240 | 0.0064841   | 0.0000513 |
| 13C2149             | 1250 °C | 0.0003001   | 0.0000086 | 0.0000977   | 0.0000199 | 0.0000373   | 0.0000205 | 0.0000958   | 0.0000240 | 0.0064841   | 0.0000513 |
| 13C2151             | 1400 °C | 0.0003001   | 0.0000086 | 0.0000977   | 0.0000199 | 0.0000373   | 0.0000205 | 0.0000958   | 0.0000240 | 0.0064841   | 0.0000513 |



| OSU Argon Geochronology Lab |         |             |           |           |        |                 |           |           |        |             |           |           |        |             |           |           |        |                |           |           |        |                |
|-----------------------------|---------|-------------|-----------|-----------|--------|-----------------|-----------|-----------|--------|-------------|-----------|-----------|--------|-------------|-----------|-----------|--------|----------------|-----------|-----------|--------|----------------|
| Intercept<br>Values         |         | 36Ar<br>[V] | 1σ        | r2        |        | 37Ar<br>[V]     | 1σ        | r2        |        | 38Ar<br>[V] | 1σ        | r2        |        | 39Ar<br>[V] | 1σ        | r2        |        | 40Ar<br>[V]    | 1σ        | r2        |        |                |
|                             | 13C2140 | 500 °C      | 0.0027243 | 0.0000158 | 0.9728 | LIN # 2 4 6     | 0.0007998 | 0.0000406 | 0.1563 | LIN # 5 7   | 0.0016283 | 0.0000222 | 0.8627 | LIN #       | 0.0206683 | 0.0000602 | 0.5160 | EXP # 2 8      | 0.7114979 | 0.0009710 | 0.9971 | EXP # 2 3      |
|                             | 13C2142 | 600 °C      | 0.0057010 | 0.0000191 | 0.9702 | LIN # 1 1 1     | 0.0042253 | 0.0000280 | 0.8897 | EXP #       | 0.0053410 | 0.0000331 | 0.9449 | LIN #       | 0.0893622 | 0.0001209 | 0.9963 | EXP # 2 3      | 1.5380952 | 0.0009547 | 0.9994 | EXP # 2 3 4    |
|                             | 13C2143 | 700 °C      | 0.0042053 | 0.0000195 | 0.9540 | LIN # 1 4 8     | 0.0066019 | 0.0000283 | 0.9728 | EXP #       | 0.0043723 | 0.0000359 | 0.9320 | LIN #       | 0.1100857 | 0.0001908 | 0.9951 | EXP # 2        | 1.1208960 | 0.0008185 | 0.9989 | EXP # 2 3      |
|                             | 13C2145 | 800 °C      | 0.0036320 | 0.0000145 | 0.9755 | LIN #           | 0.0084999 | 0.0000252 | 0.9908 | EXP #       | 0.0037860 | 0.0000222 | 0.9755 | LIN # 6     | 0.1334375 | 0.0001761 | 0.9977 | EXP #          | 0.9691165 | 0.0009016 | 0.9984 | EXP # 2 3      |
|                             | 13C2146 | 900 °C      | 0.0026950 | 0.0000179 | 0.9690 | LIN # 2 5 7     | 0.0060798 | 0.0000296 | 0.9744 | EXP # 9     | 0.0021337 | 0.0000288 | 0.7426 | LIN #       | 0.0912592 | 0.0000946 | 0.9991 | EXP # 2 3      | 0.6899208 | 0.0004066 | 0.9995 | EXP # 2 3 4    |
|                             | 13C2148 | 1050 °C     | 0.0061250 | 0.0000193 | 0.9923 | LIN # 1 2 4 5 8 | 0.0108350 | 0.0000272 | 0.9916 | EXP #       | 0.0037782 | 0.0000207 | 0.9546 | LIN # 7     | 0.1362116 | 0.0001514 | 0.9978 | EXP # 4        | 1.6653223 | 0.0004835 | 0.9999 | EXP # 2 3 4 11 |
|                             | 13C2149 | 1250 °C     | 0.0153309 | 0.0000288 | 0.9938 | EXP # 2         | 0.0279822 | 0.0001349 | 0.9643 | EXP #       | 0.0079989 | 0.0000252 | 0.9597 | LIN #       | 0.2554176 | 0.0000879 | 0.9997 | EXP # 3 4 8 11 | 4.3295502 | 0.0019062 | 0.9994 | EXP # 2 7      |
|                             | 13C2151 | 1400 °C     | 0.0057148 | 0.0000200 | 0.9862 | LIN # 1 7       | 0.0142573 | 0.0000390 | 0.9946 | LIN # 2 5   | 0.0031790 | 0.0000373 | 0.7740 | LIN #       | 0.1154730 | 0.0001810 | 0.9947 | EXP # 2        | 1.5181871 | 0.0012904 | 0.9989 | EXP # 2 3 4    |



| OSU Argon Geochronology Lab |  |         |          |           |            |                   |               |                  |       |                    |                    |                     |   |     |               |       |     |     |              |                        |        |       |      |      |      |        |             |       |         |         |         |            |           |         |    |
|-----------------------------|--|---------|----------|-----------|------------|-------------------|---------------|------------------|-------|--------------------|--------------------|---------------------|---|-----|---------------|-------|-----|-----|--------------|------------------------|--------|-------|------|------|------|--------|-------------|-------|---------|---------|---------|------------|-----------|---------|----|
| Sample Parameters           |  | Sample  | Material | Location  | Analyst    | Temp              | Standard Name | Standard (in Ma) | %1σ   | Standard Reference | Standard 40Ar/39Ar | %1σ                 | J | %1σ | Air 40Ar/36Ar | %1σ   | MDF | %1σ | Volume Ratio | Sensitivity (mol/volt) | Day    | Month | Year | Hour | Min  | Resist | Irradiation | X-pos | Y-pos   | Z/H-pos | Project | Experiment | Nmb       |         |    |
|                             |  | 13C2140 | 500 °C   | 1180051-2 | Groundmass | Kerguelen Plateau | Trevor Smith  | 500              | FCT-3 | 28.201             | 0.083              | Kuiper et al., 2008 |   |     | 0.00148940    | 0.272 |     |     | 1.0092       | 0.001                  | 0.9986 | 2E-13 | 30   | JUL  | 2013 | 7      | 49          | 1     | OSU2C13 | 0.00    | 0.00    | 57.00      | Kerguelen | 13C2140 | 01 |
|                             |  | 13C2142 | 600 °C   | 1180051-2 | Groundmass | Kerguelen Plateau | Trevor Smith  | 600              | FCT-3 | 28.201             | 0.083              | Kuiper et al., 2008 |   |     | 0.00148940    | 0.272 |     |     | 1.0092       | 0.001                  | 0.9985 | 2E-13 | 30   | JUL  | 2013 | 8      | 39          | 1     | OSU2C13 | 0.00    | 0.00    | 57.00      | Kerguelen | 13C2140 | 01 |
|                             |  | 13C2143 | 700 °C   | 1180051-2 | Groundmass | Kerguelen Plateau | Trevor Smith  | 700              | FCT-3 | 28.201             | 0.083              | Kuiper et al., 2008 |   |     | 0.00148940    | 0.272 |     |     | 1.0092       | 0.001                  | 0.9984 | 2E-13 | 30   | JUL  | 2013 | 9      | 5           | 1     | OSU2C13 | 0.00    | 0.00    | 57.00      | Kerguelen | 13C2140 | 01 |
|                             |  | 13C2145 | 800 °C   | 1180051-2 | Groundmass | Kerguelen Plateau | Trevor Smith  | 800              | FCT-3 | 28.201             | 0.083              | Kuiper et al., 2008 |   |     | 0.00148940    | 0.272 |     |     | 1.0092       | 0.001                  | 0.9983 | 2E-13 | 30   | JUL  | 2013 | 9      | 58          | 1     | OSU2C13 | 0.00    | 0.00    | 57.00      | Kerguelen | 13C2140 | 01 |
|                             |  | 13C2146 | 900 °C   | 1180051-2 | Groundmass | Kerguelen Plateau | Trevor Smith  | 900              | FCT-3 | 28.201             | 0.083              | Kuiper et al., 2008 |   |     | 0.00148940    | 0.272 |     |     | 1.0092       | 0.001                  | 0.9981 | 2E-13 | 30   | JUL  | 2013 | 10     | 26          | 1     | OSU2C13 | 0.00    | 0.00    | 57.00      | Kerguelen | 13C2140 | 01 |
|                             |  | 13C2148 | 1050 °C  | 1180051-2 | Groundmass | Kerguelen Plateau | Trevor Smith  | 1050             | FCT-3 | 28.201             | 0.083              | Kuiper et al., 2008 |   |     | 0.00148940    | 0.272 |     |     | 1.0092       | 0.001                  | 0.9981 | 2E-13 | 30   | JUL  | 2013 | 11     | 18          | 1     | OSU2C13 | 0.00    | 0.00    | 57.00      | Kerguelen | 13C2140 | 01 |
|                             |  | 13C2149 | 1250 °C  | 1180051-2 | Groundmass | Kerguelen Plateau | Trevor Smith  | 1250             | FCT-3 | 28.201             | 0.083              | Kuiper et al., 2008 |   |     | 0.00148940    | 0.272 |     |     | 1.0092       | 0.001                  | 0.9981 | 2E-13 | 30   | JUL  | 2013 | 11     | 43          | 1     | OSU2C13 | 0.00    | 0.00    | 57.00      | Kerguelen | 13C2140 | 01 |
|                             |  | 13C2151 | 1400 °C  | 1180051-2 | Groundmass | Kerguelen Plateau | Trevor Smith  | 1400             | FCT-3 | 28.201             | 0.083              | Kuiper et al., 2008 |   |     | 0.00148940    | 0.272 |     |     | 1.0092       | 0.001                  | 0.998  | 2E-13 | 30   | JUL  | 2013 | 12     | 33          | 1     | OSU2C13 | 0.00    | 0.00    | 57.00      | Kerguelen | 13C2140 | 01 |



| OSU Argon Geochronology Lab |         |          |       |          |       |          |        |          |       |           |          |           |          |           |          |          |         |          |         |           |     |      |     |      |     |       |     |
|-----------------------------|---------|----------|-------|----------|-------|----------|--------|----------|-------|-----------|----------|-----------|----------|-----------|----------|----------|---------|----------|---------|-----------|-----|------|-----|------|-----|-------|-----|
| Irradiation<br>Constants    |         | 40/36(a) | %1σ   | 40/36(c) | %1σ   | 38/36(a) | %1σ    | 38/36(c) | %1σ   | 39/37(ca) | %1σ      | 38/37(ca) | %1σ      | 36/37(ca) | %1σ      | 40/39(k) | %1σ     | 38/39(k) | %1σ     | 36/38(cl) | %1σ | K/Ca | %1σ | K/Cl | %1σ | Ca/Cl | %1σ |
|                             | 13C2140 | 500 °C   | 295.5 | 0        | 0.018 | 35       | 0.1869 | 0        | 1.493 | 3         | 0.000673 | 0         | 0.000139 | 0         | 0.000264 | 0        | 0.00101 | 0        | 0.01138 | 0         | 0   | 0    | 0   | 0    | 0   | 0     | 0   |
|                             | 13C2142 | 600 °C   | 295.5 | 0        | 0.018 | 35       | 0.1869 | 0        | 1.493 | 3         | 0.000673 | 0         | 0.000139 | 0         | 0.000264 | 0        | 0.00101 | 0        | 0.01138 | 0         | 0   | 0    | 0   | 0    | 0   | 0     | 0   |
|                             | 13C2143 | 700 °C   | 295.5 | 0        | 0.018 | 35       | 0.1869 | 0        | 1.493 | 3         | 0.000673 | 0         | 0.000139 | 0         | 0.000264 | 0        | 0.00101 | 0        | 0.01138 | 0         | 0   | 0    | 0   | 0    | 0   | 0     | 0   |
|                             | 13C2145 | 800 °C   | 295.5 | 0        | 0.018 | 35       | 0.1869 | 0        | 1.493 | 3         | 0.000673 | 0         | 0.000139 | 0         | 0.000264 | 0        | 0.00101 | 0        | 0.01138 | 0         | 0   | 0    | 0   | 0    | 0   | 0     | 0   |
|                             | 13C2146 | 900 °C   | 295.5 | 0        | 0.018 | 35       | 0.1869 | 0        | 1.493 | 3         | 0.000673 | 0         | 0.000139 | 0         | 0.000264 | 0        | 0.00101 | 0        | 0.01138 | 0         | 0   | 0    | 0   | 0    | 0   | 0     | 0   |
|                             | 13C2148 | 1050 °C  | 295.5 | 0        | 0.018 | 35       | 0.1869 | 0        | 1.493 | 3         | 0.000673 | 0         | 0.000139 | 0         | 0.000264 | 0        | 0.00101 | 0        | 0.01138 | 0         | 0   | 0    | 0   | 0    | 0   | 0     | 0   |
|                             | 13C2149 | 1250 °C  | 295.5 | 0        | 0.018 | 35       | 0.1869 | 0        | 1.493 | 3         | 0.000673 | 0         | 0.000139 | 0         | 0.000264 | 0        | 0.00101 | 0        | 0.01138 | 0         | 0   | 0    | 0   | 0    | 0   | 0     | 0   |
|                             | 13C2151 | 1400 °C  | 295.5 | 0        | 0.018 | 35       | 0.1869 | 0        | 1.493 | 3         | 0.000673 | 0         | 0.000139 | 0         | 0.000264 | 0        | 0.00101 | 0        | 0.01138 | 0         | 0   | 0    | 0   | 0    | 0   | 0     | 0   |
|                             |         |          |       |          |       |          |        |          |       |           |          |           |          |           |          |          |         |          |         |           |     |      |     |      |     |       |     |



13C2140.AGE >>> 1180051-2 >>> KERGUELEN PROJECT

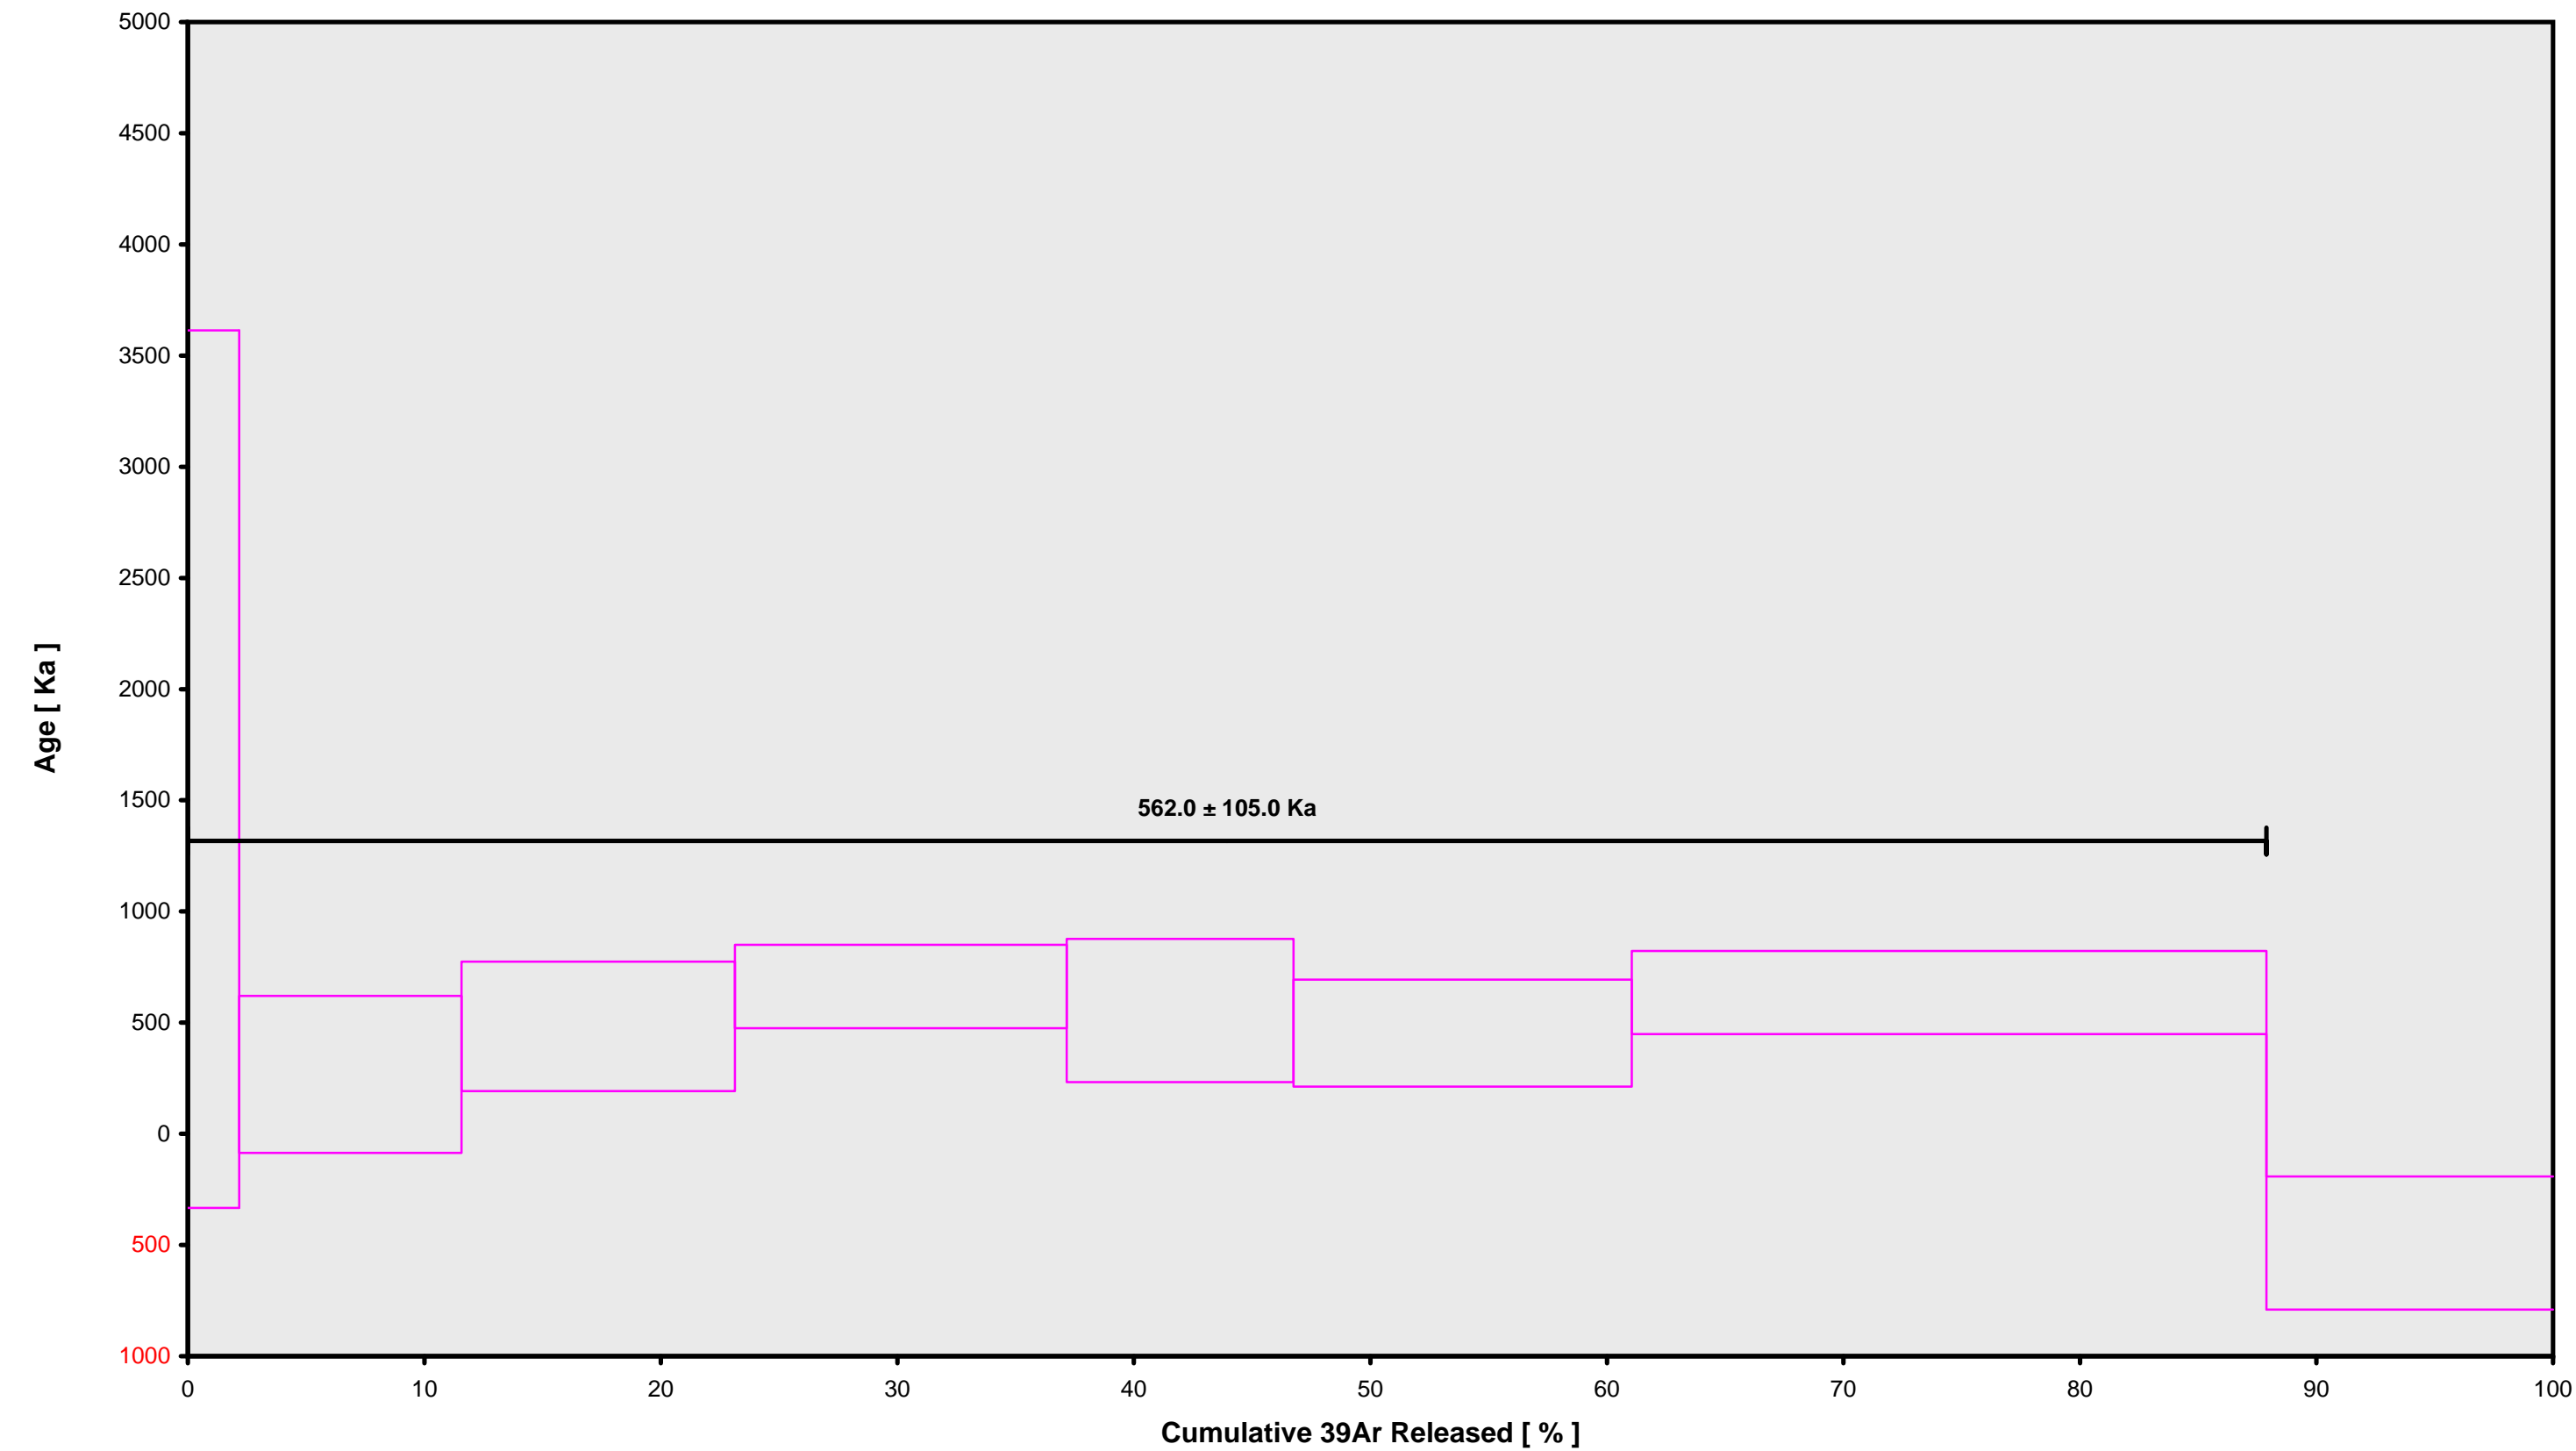

Ar-Ages in Ka

WEIGHTED PLATEAU

562.0 ± 105.0

TOTAL FUSION

438.7 ± 103.6

NORMAL ISOCHRON

608.7 ± 329.0

INVERSE ISOCHRON

607.6 ± 279.9

MSWD (PROBABILITY)

1.15 (33%)

Sample Info

Groundmass

Kerguelen Plateau

Trevor Smith

IRR = OSU2C13

J = 0.00148940 ± 0.00000405

RECALIBRATED AGE



13C2140.AGE >>> 1180051-2 >>> KERGUELEN PROJECT

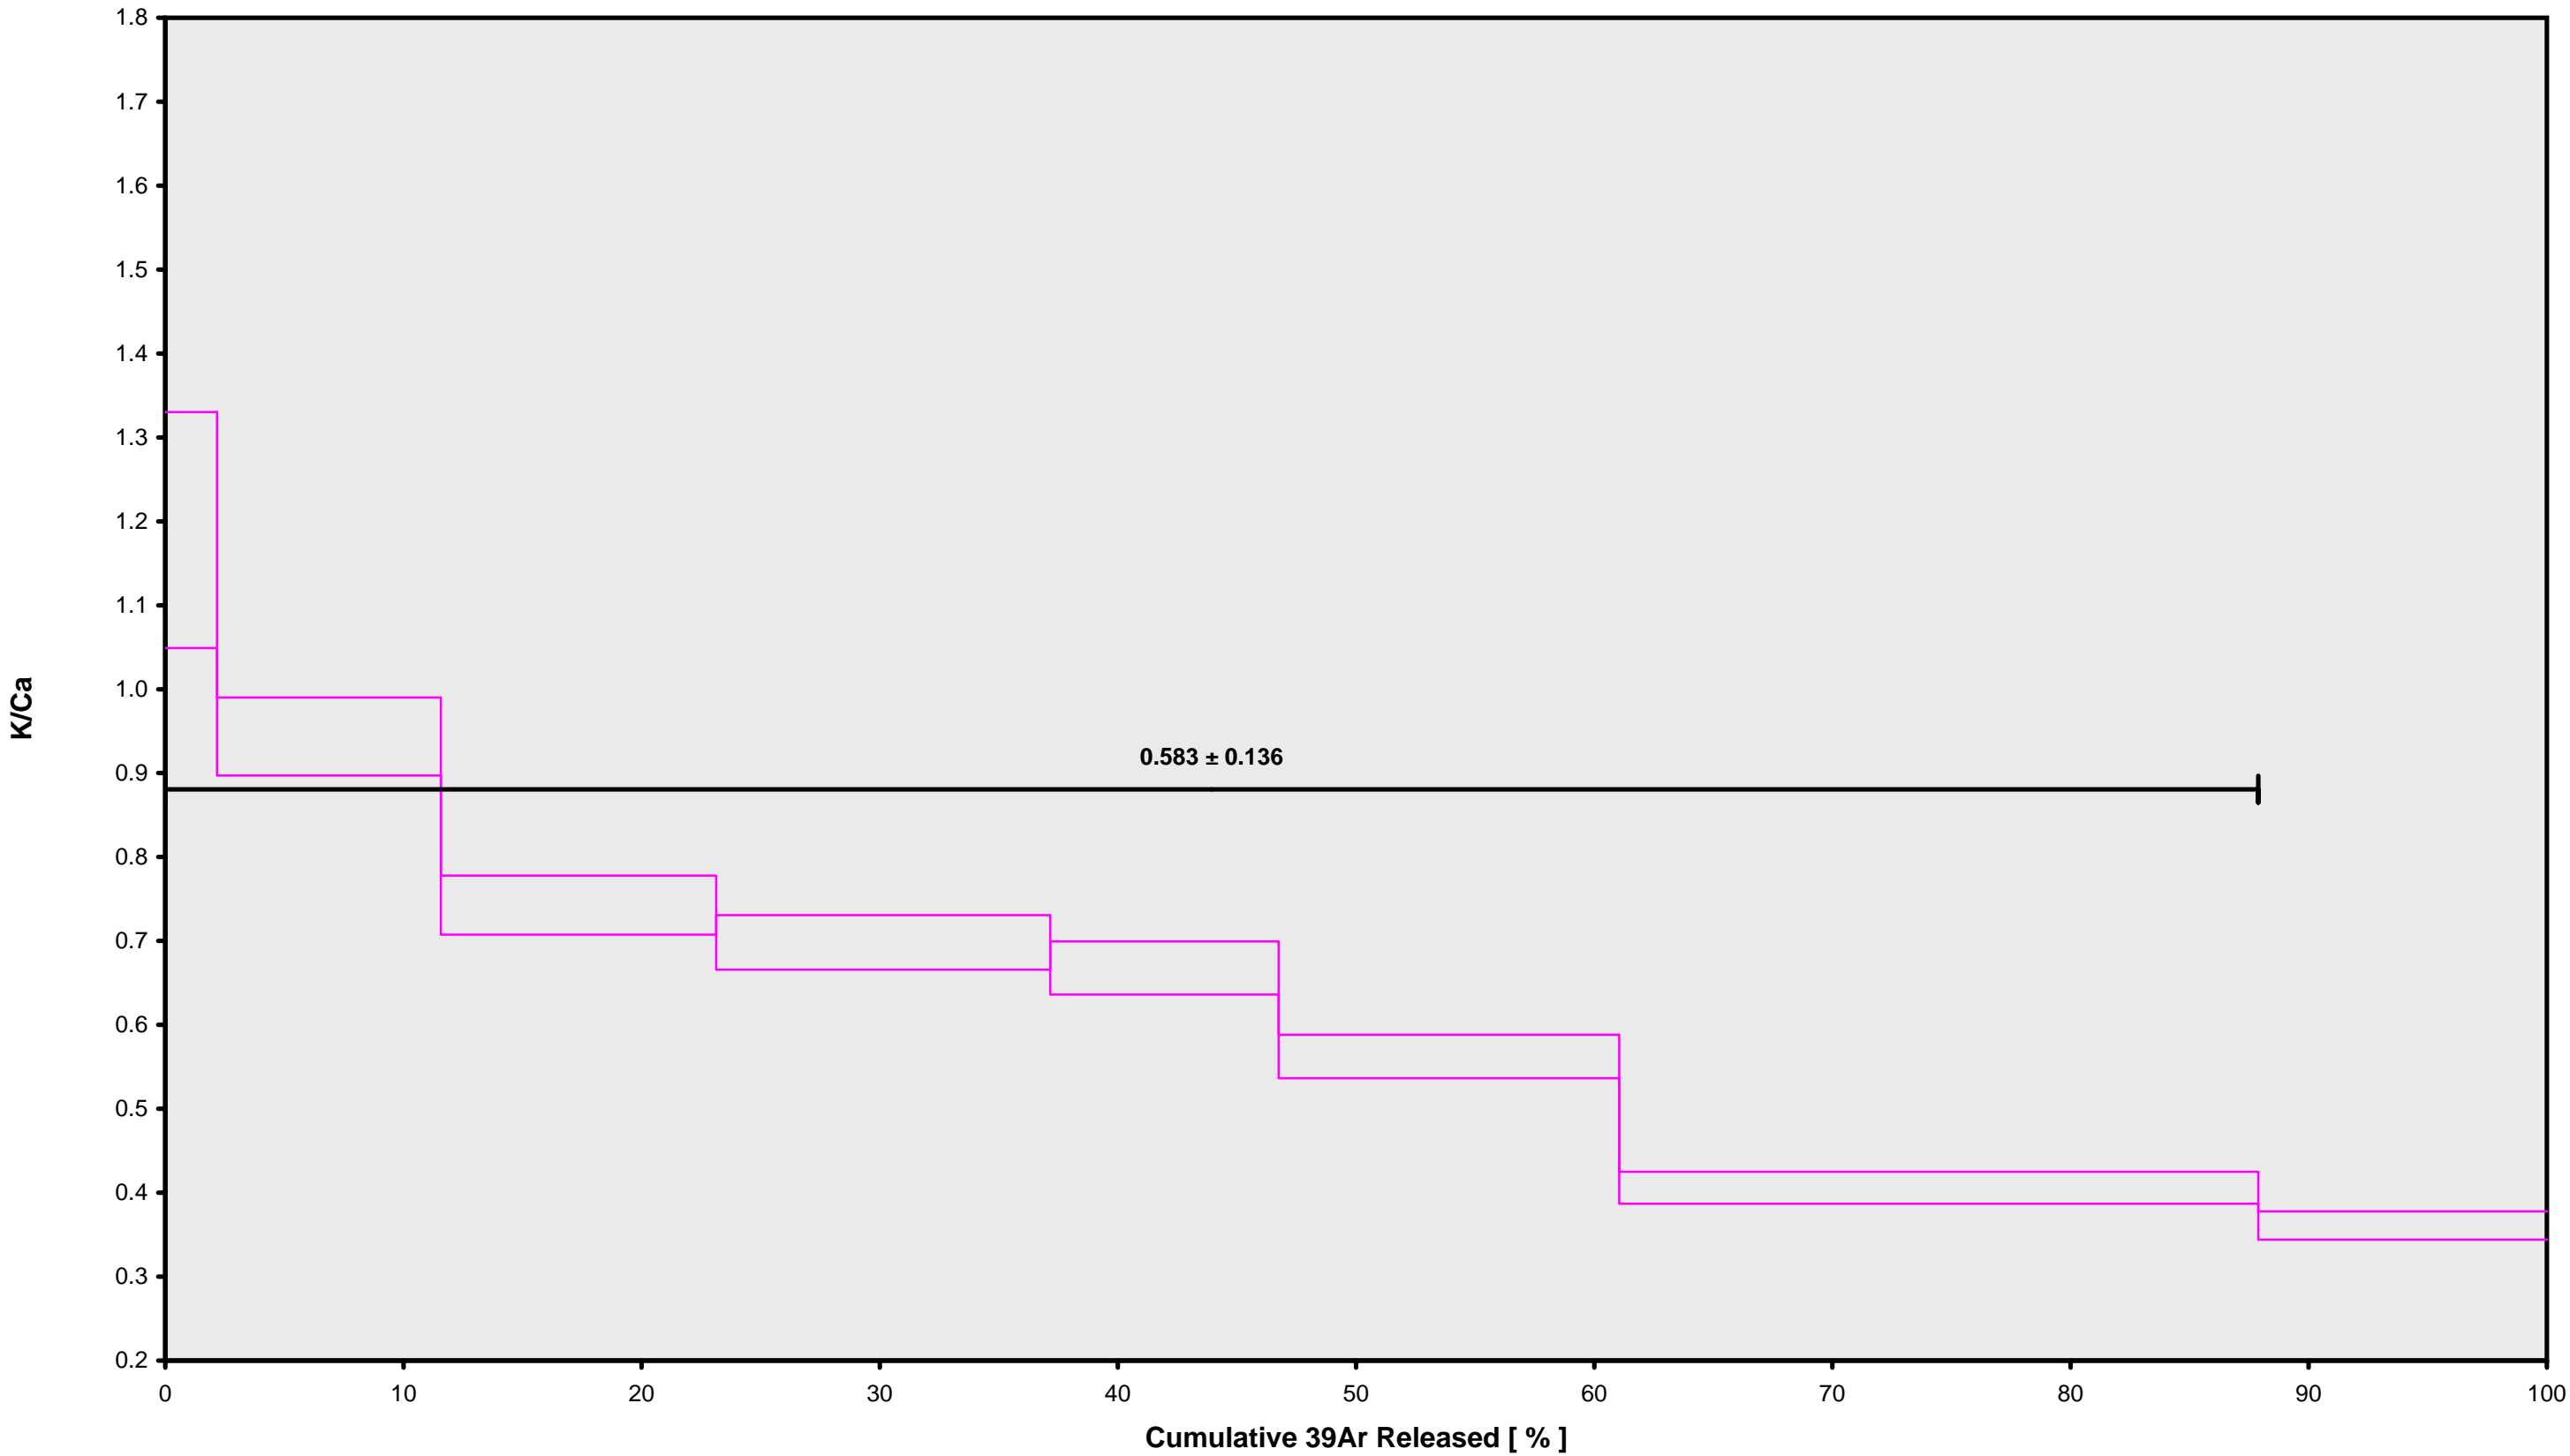

**Ar-Ages in Ka**

**WEIGHTED PLATEAU**

$562.0 \pm 105.0$

**TOTAL FUSION**

$438.7 \pm 103.6$

**NORMAL ISOCHRON**

$608.7 \pm 329.0$

**INVERSE ISOCHRON**

$607.6 \pm 279.9$

**Sample Info**

**Groundmass**

**Kerguelen Plateau**

**Trevor Smith**

**IRR = OSU2C13**

**J =  $0.00148940 \pm 0.00000405$**

**RECALIBRATED AGE**



13C2140.AGE >>> 1180051-2 >>> KERGUELEN PROJECT

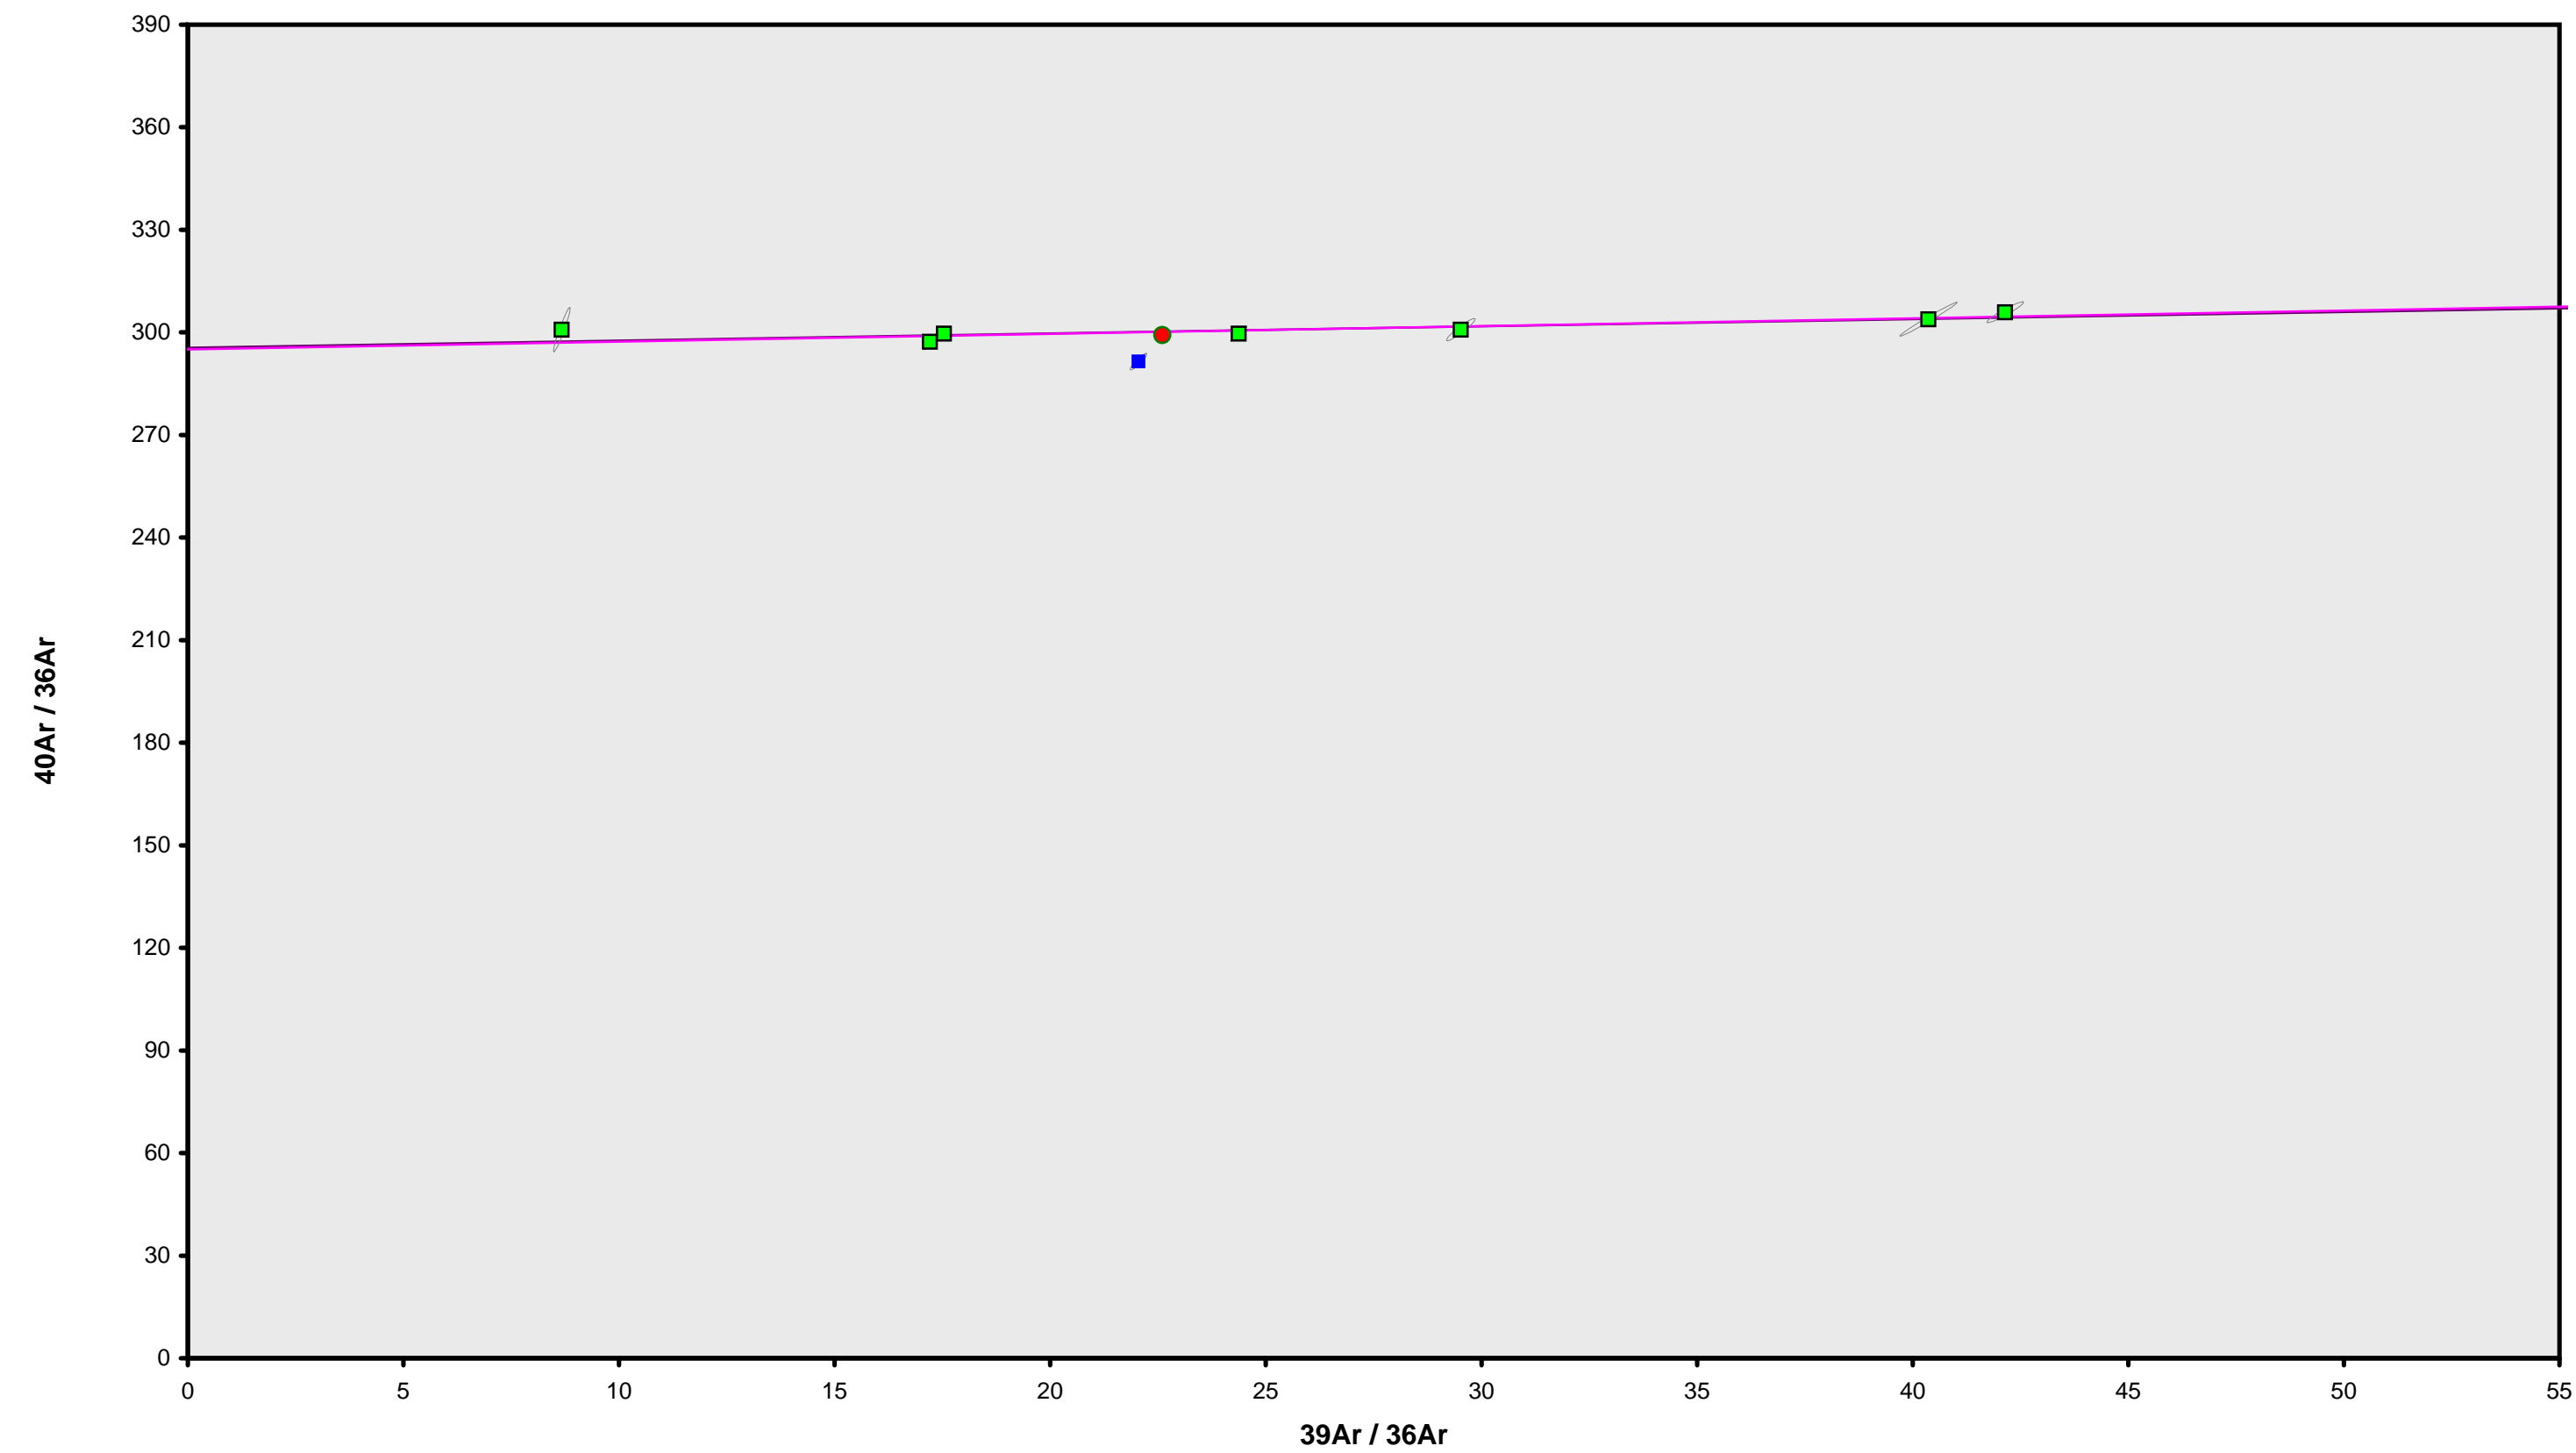

**Ar-Ages in Ka**

**WEIGHTED PLATEAU**  
562.0  $\pm$  105.0

**TOTAL FUSION**  
438.7  $\pm$  103.6

**NORMAL ISOCHRON**  
608.7  $\pm$  329.0

**INVERSE ISOCHRON**  
607.6  $\pm$  279.9

**MSWD (PROBABILITY)**  
1.35 (24%)

**40AR/36AR INTERCEPT**  
295.1  $\pm$  2.9

**Sample Info**

Groundmass  
Kerguelen Plateau  
Trevor Smith

IRR = OSU2C13  
J = 0.00148940  $\pm$  0.00000405

RECALIBRATED AGE



13C2140.AGE >>> 1180051-2 >>> KERGUELEN PROJECT

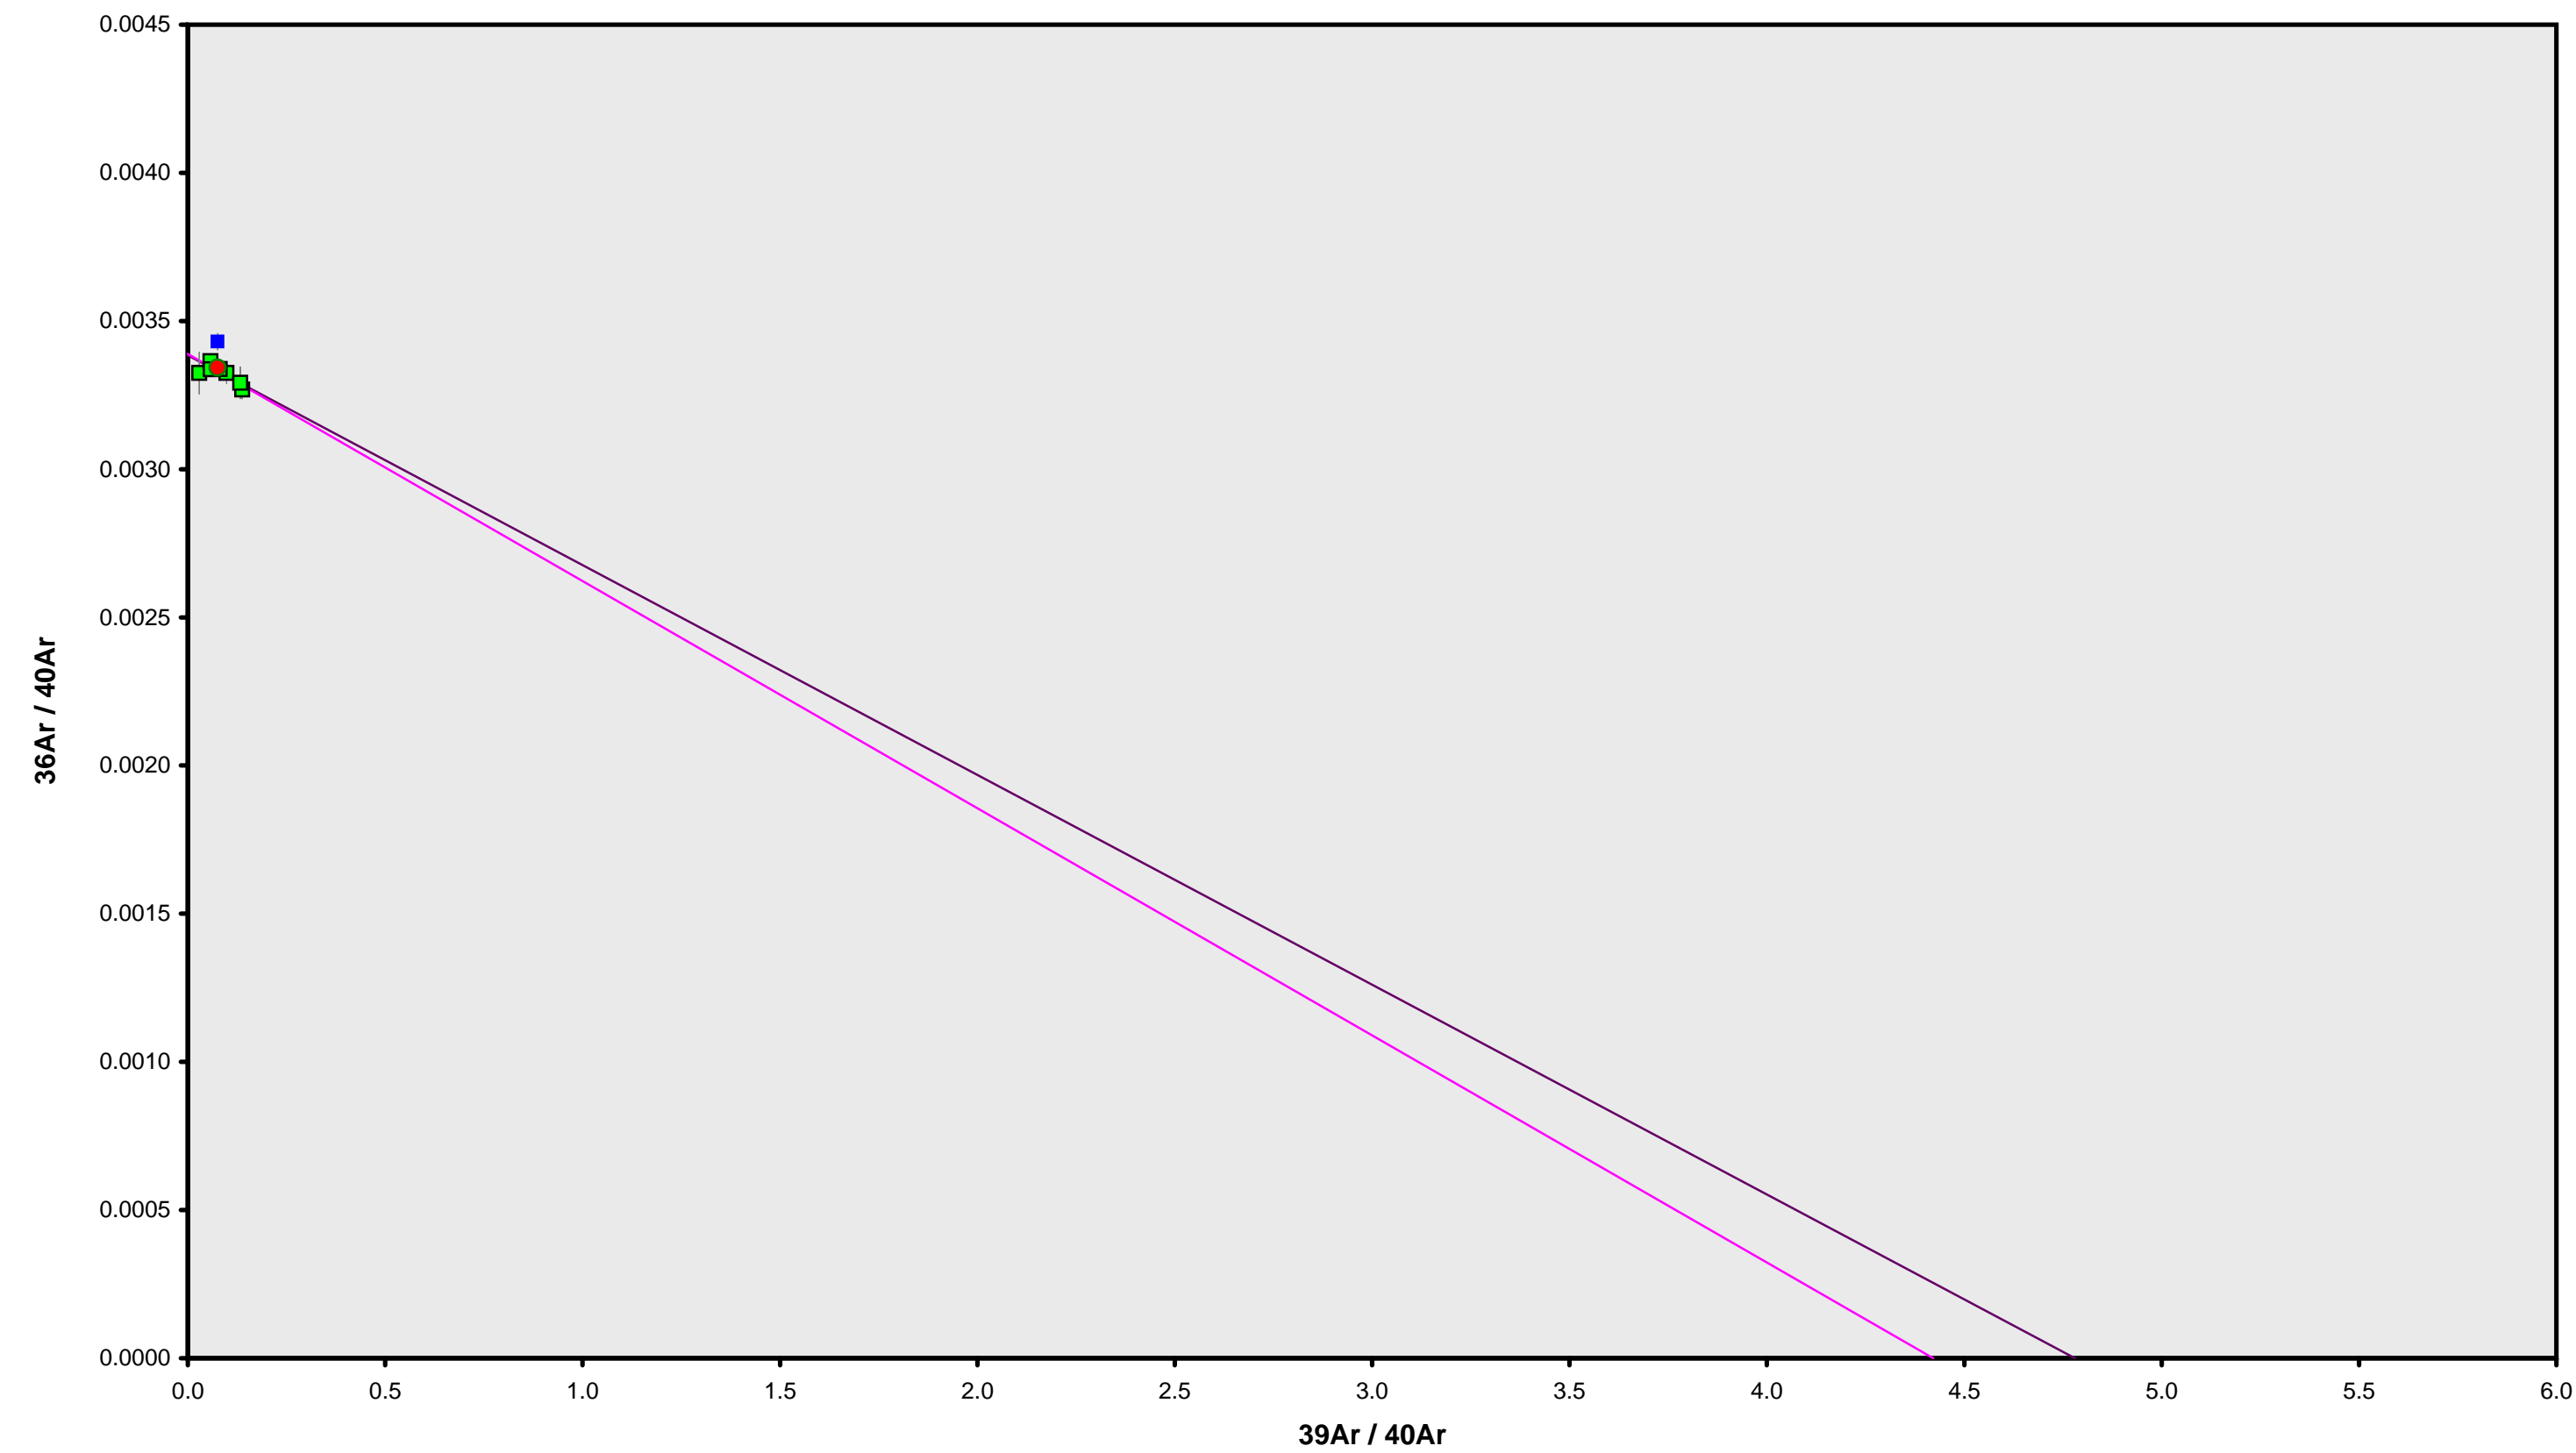

**Ar-Ages in Ka**

**WEIGHTED PLATEAU**  
562.0 ± 105.0

**TOTAL FUSION**  
438.7 ± 103.6

**NORMAL ISOCHRON**  
608.7 ± 329.0

**INVERSE ISOCHRON**  
607.6 ± 279.9

**MSWD (PROBABILITY)**  
1.35 (24%)

**SPREADING FACTOR**  
2.5%

**40AR/36AR INTERCEPT**  
295.1 ± 2.9

**Sample Info**

Groundmass  
Kerguelen Plateau  
Trevor Smith

IRR = OSU2C13  
J = 0.00148940 ± 0.00000405

**RECALIBRATED AGE**



| Incremental Heating |         | 36Ar(a)<br>[V] | 37Ar(ca)<br>[V] | 38Ar(cl)<br>[V] | 39Ar(k)<br>[V] | 40Ar(r)<br>[V] | Age ± 2σ<br>(Ma) | 40Ar(r)<br>(%) | 39Ar(k)<br>(%) | K/Ca ± 2σ   |
|---------------------|---------|----------------|-----------------|-----------------|----------------|----------------|------------------|----------------|----------------|-------------|
| 13C2127             | 500 °C  | 0.0011107      | 0.0059504       | 0.0000647       | 0.0076998      | 0.0281286      | 9.90 ± 4.01      | 7.89           | 0.73           | 0.56 ± 0.04 |
| 13C2129             | 600 °C  | ✓ 0.0025102    | 0.0321925       | 0.0000414       | 0.0368172      | 0.0704835      | 5.20 ± 0.64      | 8.68           | 3.51           | 0.49 ± 0.02 |
| 13C2130             | 700 °C  | ✓ 0.0012729    | 0.0674809       | 0.0001086       | 0.0827373      | 0.1711294      | 5.61 ± 0.36      | 31.26          | 7.89           | 0.53 ± 0.03 |
| 13C2132             | 800 °C  | ✓ 0.0006673    | 0.1244007       | 0.0000817       | 0.1831603      | 0.3667773      | 5.43 ± 0.19      | 65.02          | 17.47          | 0.63 ± 0.03 |
| 13C2133             | 900 °C  | ✓ 0.0002545    | 0.1155284       | 0.0000904       | 0.2112330      | 0.4229282      | 5.43 ± 0.16      | 84.87          | 20.15          | 0.79 ± 0.04 |
| 13C2135             | 1050 °C | ✓ 0.0003354    | 0.1533263       | 0.0005036       | 0.2710604      | 0.5376452      | 5.38 ± 0.18      | 84.40          | 25.85          | 0.76 ± 0.04 |
| 13C2136             | 1250 °C | ✓ 0.0003335    | 0.1519160       | 0.0006191       | 0.1821459      | 0.3586408      | 5.34 ± 0.27      | 78.41          | 17.37          | 0.52 ± 0.02 |
| 13C2138             | 1400 °C | ✓ 0.0001113    | 0.0715603       | 0.0002610       | 0.0735777      | 0.1551340      | 5.72 ± 0.36      | 82.48          | 7.02           | 0.44 ± 0.02 |

|  |   |           |           |           |           |           |  |  |  |  |
|--|---|-----------|-----------|-----------|-----------|-----------|--|--|--|--|
|  | Σ | 0.0065957 | 0.7223555 | 0.0017706 | 1.0484316 | 2.1108669 |  |  |  |  |
|--|---|-----------|-----------|-----------|-----------|-----------|--|--|--|--|

| Information on Analysis                                                                                                                                                                                                                            | Results          | 40(r)/39(k) ± 2σ  | Age ± 2σ (Ma)              | MSWD   | 39Ar(k) (% ,n)      | K/Ca ± 2σ   |
|----------------------------------------------------------------------------------------------------------------------------------------------------------------------------------------------------------------------------------------------------|------------------|-------------------|----------------------------|--------|---------------------|-------------|
| Sample = 1180042-1<br>Material = Groundmass<br>Location = Kerguelen Plateau<br>Analyst = Trevor Smith<br>Project = KERGUELEN<br>Mass Discrimination Law = LIN<br>Irradiation = OSU2C13<br>J = 0.00150670 ± 0.00000405<br>FCT-3 = 28.201 ± 0.023 Ma | Age Plateau      | 2.00313 ± 0.03243 | 5.44 ± 0.09                | 0.81   | 99.27               | 0.55 ± 0.09 |
|                                                                                                                                                                                                                                                    | Recalibrated     | ± 1.62%           | ± 1.70%                    | 56%    | 7                   |             |
|                                                                                                                                                                                                                                                    |                  |                   | Full External Error ± 0.15 | 2.15   | 2σ Confidence Limit |             |
|                                                                                                                                                                                                                                                    |                  |                   | Analytical Error ± 0.09    | 1.0000 | Error Magnification |             |
|                                                                                                                                                                                                                                                    | Total Fusion Age | 2.01336 ± 0.03578 | 5.46 ± 0.10                |        | 8                   | 0.62 ± 0.01 |
|                                                                                                                                                                                                                                                    | Recalibrated     | ± 1.78%           | ± 1.85%                    |        |                     |             |
|                                                                                                                                                                                                                                                    |                  |                   | Full External Error ± 0.16 |        |                     |             |
|                                                                                                                                                                                                                                                    |                  |                   | Analytical Error ± 0.10    |        |                     |             |



| Normal Isochron |         | 39(k)/36(a) ± 2σ |                 | 40(a+r)/36(a) ± 2σ | r.i.   |
|-----------------|---------|------------------|-----------------|--------------------|--------|
| 13C2127         | 500 °C  |                  | 6.93 ± 0.25     | 320.83 ± 11.16     | 0.9679 |
| 13C2129         | 600 °C  | ✓                | 14.67 ± 0.17    | 323.58 ± 3.79      | 0.9281 |
| 13C2130         | 700 °C  | ✓                | 65.00 ± 1.91    | 429.94 ± 12.51     | 0.9914 |
| 13C2132         | 800 °C  | ✓                | 274.49 ± 17.74  | 845.17 ± 54.61     | 0.9998 |
| 13C2133         | 900 °C  | ✓                | 829.96 ± 134.95 | 1957.24 ± 318.21   | 0.9998 |
| 13C2135         | 1050 °C | ✓                | 808.19 ± 147.50 | 1898.53 ± 346.43   | 0.9998 |
| 13C2136         | 1250 °C | ✓                | 546.19 ± 101.65 | 1370.94 ± 255.11   | 0.9998 |
| 13C2138         | 1400 °C | ✓                | 661.12 ± 196.10 | 1689.42 ± 501.07   | 0.9999 |

| Results                         | 40(a)/36(a) ± 2σ      |        | 40(r)/39(k) ± 2σ           | Age ± 2σ (Ma)   | MSWD |
|---------------------------------|-----------------------|--------|----------------------------|-----------------|------|
| Normal Isochron<br>Recalibrated | 294.99 ± 3.42         |        | 2.00062 ± 0.03488          | 5.43 ± 0.10     | 0.78 |
|                                 | ± 1.16%               |        | ± 1.74%                    | ± 1.82%         | 57%  |
|                                 |                       |        | Full External Error ± 0.16 |                 |      |
|                                 |                       |        | Analytical Error ± 0.09    |                 |      |
| Statistics                      | 2σ Confidence Limit   | 2.26   | Convergence                | 0.000000019567  |      |
|                                 | Error Magnification   | 1.0000 | Number of Iterations       | 253             |      |
|                                 | Number of Data Points | 7      | Calculated Line            | Weighted York-2 |      |



| Inverse Isochron |         | 39(k)/40(a+r) ± 2σ |                       | 36(a)/40(a+r) ± 2σ      | r.i.   |
|------------------|---------|--------------------|-----------------------|-------------------------|--------|
| 13C2127          | 500 °C  |                    | 0.0216088 ± 0.0001949 | 0.00311695 ± 0.00010847 | 0.0042 |
| 13C2129          | 600 °C  | ✓                  | 0.0453282 ± 0.0002022 | 0.00309043 ± 0.00003622 | 0.1728 |
| 13C2130          | 700 °C  | ✓                  | 0.1511824 ± 0.0005785 | 0.00232590 ± 0.00006765 | 0.0056 |
| 13C2132          | 800 °C  | ✓                  | 0.3247787 ± 0.0004655 | 0.00118319 ± 0.00007646 | 0.0102 |
| 13C2133          | 900 °C  | ✓                  | 0.4240471 ± 0.0014617 | 0.00051092 ± 0.00008307 | 0.0046 |
| 13C2135          | 1050 °C | ✓                  | 0.4256911 ± 0.0016526 | 0.00052672 ± 0.00009611 | 0.0032 |
| 13C2136          | 1250 °C | ✓                  | 0.3984077 ± 0.0014990 | 0.00072943 ± 0.00013574 | 0.0022 |
| 13C2138          | 1400 °C | ✓                  | 0.3913268 ± 0.0015686 | 0.00059192 ± 0.00017556 | 0.0013 |

| Results          | 40(a)/36(a) ± 2σ      | 40(r)/39(k) ± 2σ  | Age ± 2σ (Ma)              | MSWD            |
|------------------|-----------------------|-------------------|----------------------------|-----------------|
| Inverse Isochron | 294.92 ± 3.42         | 2.00541 ± 0.03502 | 5.44 ± 0.10                | 0.95            |
| Recalibrated     | ± 1.16%               | ± 1.75%           | ± 1.82%                    | 45%             |
|                  |                       |                   | Full External Error ± 0.16 |                 |
|                  |                       |                   | Analytical Error ± 0.09    |                 |
|                  |                       |                   |                            |                 |
| Statistics       | 2σ Confidence Limit   | 2.26              | Convergence                | 0.0000000071    |
|                  | Error Magnification   | 1.0000            | Number of Iterations       | 4               |
|                  | Number of Data Points | 7                 | Calculated Line            | Weighted York-2 |
|                  | Spreading Factor      | 76.3%             |                            |                 |



| OSU Argon Geochronology Lab |         |             |           |           |           |           |           |           |           |           |           |                   |               |             |             |             |
|-----------------------------|---------|-------------|-----------|-----------|-----------|-----------|-----------|-----------|-----------|-----------|-----------|-------------------|---------------|-------------|-------------|-------------|
| Relative Abundances         |         | 40Ar [V]    | 1σ        | 39Ar [V]  | 1σ        | 38Ar [V]  | 1σ        | 37Ar [V]  | 1σ        | 36Ar [V]  | 1σ        | 40(r)/39(k) ± 2σ  | Age ± 2σ (Ma) | 40Ar(r) (%) | 39Ar(k) (%) | K/Ca ± 2σ   |
| 13C2127                     | 500 °C  | 0.3563360   | 0.0002043 | 0.0077038 | 0.0000344 | 0.0003607 | 0.0000287 | 0.0059504 | 0.0002129 | 0.0011122 | 0.0000193 | 3.65316 ± 1.48378 | 9.90 ± 4.01   | 7.89        | 0.73        | 0.56 ± 0.04 |
| 13C2129                     | 600 °C  | ✓ 0.8122730 | 0.0012204 | 0.0368389 | 0.0000607 | 0.0009340 | 0.0000302 | 0.0321925 | 0.0007744 | 0.0025187 | 0.0000142 | 1.91442 ± 0.23773 | 5.20 ± 0.64   | 8.68        | 3.51        | 0.49 ± 0.02 |
| 13C2130                     | 700 °C  | ✓ 0.5473517 | 0.0002166 | 0.0827827 | 0.0001549 | 0.0012974 | 0.0000224 | 0.0674809 | 0.0016179 | 0.0012907 | 0.0000185 | 2.06835 ± 0.13252 | 5.61 ± 0.36   | 31.26       | 7.89        | 0.53 ± 0.03 |
| 13C2132                     | 800 °C  | ✓ 0.5641391 | 0.0002746 | 0.1832440 | 0.0000963 | 0.0023081 | 0.0000297 | 0.1244007 | 0.0028651 | 0.0007001 | 0.0000215 | 2.00249 ± 0.06965 | 5.43 ± 0.19   | 65.02       | 17.47       | 0.63 ± 0.03 |
| 13C2133                     | 900 °C  | ✓ 0.4983491 | 0.0004003 | 0.2113108 | 0.0003221 | 0.0025579 | 0.0000211 | 0.1155284 | 0.0026624 | 0.0002850 | 0.0000207 | 2.00219 ± 0.05833 | 5.43 ± 0.16   | 84.87       | 20.15       | 0.79 ± 0.04 |
| 13C2135                     | 1050 °C | ✓ 0.6370275 | 0.0004825 | 0.2711636 | 0.0004844 | 0.0036723 | 0.0000443 | 0.1533263 | 0.0035376 | 0.0003760 | 0.0000306 | 1.98349 ± 0.06719 | 5.38 ± 0.18   | 84.40       | 25.85       | 0.76 ± 0.04 |
| 13C2136                     | 1250 °C | ✓ 0.4573687 | 0.0002853 | 0.1822481 | 0.0003233 | 0.0027754 | 0.0000526 | 0.1519160 | 0.0035795 | 0.0003737 | 0.0000310 | 1.96898 ± 0.10096 | 5.34 ± 0.27   | 78.41       | 17.37       | 0.52 ± 0.02 |
| 13C2138                     | 1400 °C | ✓ 0.1880954 | 0.0001157 | 0.0736258 | 0.0001403 | 0.0011291 | 0.0000393 | 0.0715603 | 0.0016960 | 0.0001302 | 0.0000165 | 2.10844 ± 0.13285 | 5.72 ± 0.36   | 82.48       | 7.02        | 0.44 ± 0.02 |

|   |  |           |           |           |           |           |           |           |           |           |           |  |  |  |  |  |
|---|--|-----------|-----------|-----------|-----------|-----------|-----------|-----------|-----------|-----------|-----------|--|--|--|--|--|
| Σ |  | 4.0609404 | 0.0014634 | 1.0489177 | 0.0007076 | 0.0150349 | 0.0000992 | 0.7223555 | 0.0068384 | 0.0067867 | 0.0000631 |  |  |  |  |  |
|---|--|-----------|-----------|-----------|-----------|-----------|-----------|-----------|-----------|-----------|-----------|--|--|--|--|--|

| Information on Analysis and Constants Used in Calculations |  | Results          |  |  |  |  |  |  |
|------------------------------------------------------------|--|------------------|--|--|--|--|--|--|
| Sample = 1180042-1                                         |  | 40(a)/36(a) ± 2σ |  |  |  |  |  |  |
| Material = Groundmass                                      |  | 40(r)/39(k) ± 2σ |  |  |  |  |  |  |
| Location = Kerguelen Plateau                               |  | Age ± 2σ (Ma)    |  |  |  |  |  |  |
| Analyst = Trevor Smith                                     |  | MSWD             |  |  |  |  |  |  |
| Project = KERGUELEN                                        |  | 39Ar(k) (%.n)    |  |  |  |  |  |  |
| Mass Discrimination Law = LIN                              |  | K/Ca ± 2σ        |  |  |  |  |  |  |
| Irradiation = OSU2C13                                      |  |                  |  |  |  |  |  |  |
| J = 0.00150670 ± 0.00000405                                |  |                  |  |  |  |  |  |  |
| FCT-3 = 28.201 ± 0.023 Ma                                  |  |                  |  |  |  |  |  |  |
| IGSN = Undefined                                           |  |                  |  |  |  |  |  |  |
| Preferred Age = Undefined                                  |  |                  |  |  |  |  |  |  |
| Classification = Undefined                                 |  |                  |  |  |  |  |  |  |
| Experiment Type = Undefined                                |  |                  |  |  |  |  |  |  |
| Extraction Method = Undefined                              |  |                  |  |  |  |  |  |  |
| Heating = 0 sec                                            |  |                  |  |  |  |  |  |  |
| Isolation = 15.00 min                                      |  |                  |  |  |  |  |  |  |
| Instrument = MAP215-50                                     |  |                  |  |  |  |  |  |  |
| Lithology = Undefined                                      |  |                  |  |  |  |  |  |  |
| Lat-Lon = Undefined - Undefined                            |  |                  |  |  |  |  |  |  |
| R1 ratio = Undefined                                       |  |                  |  |  |  |  |  |  |
| R2 ratio = Undefined                                       |  |                  |  |  |  |  |  |  |
| R3 ratio = Undefined                                       |  |                  |  |  |  |  |  |  |
| R4 ratio = Undefined                                       |  |                  |  |  |  |  |  |  |
| R5 ratio = Undefined                                       |  |                  |  |  |  |  |  |  |
| Collector Calibrations =                                   |  |                  |  |  |  |  |  |  |
|                                                            |  |                  |  |  |  |  |  |  |

|                                                                 |  |                            |  |  |  |  |  |  |
|-----------------------------------------------------------------|--|----------------------------|--|--|--|--|--|--|
| Age Equations = Min et al. (2000)                               |  | Age Plateau                |  |  |  |  |  |  |
| Negative Intensities = Allowed                                  |  | Recalibrated               |  |  |  |  |  |  |
| Decay Constant 40K = 5.543 ± 0.044 E-10 1/a                     |  | 2.00313 ± 0.03243          |  |  |  |  |  |  |
| Decay Constant 39Ar = 2.940 ± 0.029 E-07 1/h                    |  | 5.44 ± 0.09                |  |  |  |  |  |  |
| Decay Constant 37Ar = 8.230 ± 0.082 E-04 1/h                    |  | ± 1.62%                    |  |  |  |  |  |  |
| Decay Constant 36Cl = 2.236 ± 0.045 E-06 1/a                    |  | Full External Error ± 0.15 |  |  |  |  |  |  |
| Decay Constant 40K(EC,β <sup>+</sup> ) = 0.580 ± 0.009 E-10 1/a |  | Analytical Error ± 0.09    |  |  |  |  |  |  |
| Decay Constant 40K(β <sup>-</sup> ) = 4.950 ± 0.043 E-10 1/a    |  | 1.0000                     |  |  |  |  |  |  |
| Atmospheric Ratio 40/36(a) = 295.50                             |  | Total Fusion Age           |  |  |  |  |  |  |
| Atmospheric Ratio 38/36(a) = 0.1869                             |  | Recalibrated               |  |  |  |  |  |  |
| Production Ratio 39/37(ca) = 0.000673                           |  | 2.01336 ± 0.03578          |  |  |  |  |  |  |
| Production Ratio 38/37(ca) = 0.000139                           |  | 5.46 ± 0.10                |  |  |  |  |  |  |
| Production Ratio 36/37(ca) = 0.000264                           |  | ± 1.78%                    |  |  |  |  |  |  |
| Production Ratio 40/39(k) = 0.001010                            |  | Full External Error ± 0.16 |  |  |  |  |  |  |
| Production Ratio 38/39(k) = 0.011380                            |  | Analytical Error ± 0.10    |  |  |  |  |  |  |
| Production Ratio 36/38(cl) = 316.00 ± 15.80                     |  | Normal Isochron            |  |  |  |  |  |  |
| Scaling Ratio K/Ca = 0.430                                      |  | Recalibrated               |  |  |  |  |  |  |
| Abundance Ratio 40K/K = 1.1700 ± 0.0199 E-04                    |  | 294.99 ± 3.42              |  |  |  |  |  |  |
| Atomic Weight K = 39.0983 ± 0.0001 g                            |  | ± 1.16%                    |  |  |  |  |  |  |
| Recalibrated to FCT-3 Secondary Standard                        |  | 2.00062 ± 0.03488          |  |  |  |  |  |  |
| Standard Age = 28.201 ± 0.023 Ma                                |  | 5.43 ± 0.10                |  |  |  |  |  |  |
|                                                                 |  | ± 1.82%                    |  |  |  |  |  |  |
|                                                                 |  | Full External Error ± 0.16 |  |  |  |  |  |  |
|                                                                 |  | Analytical Error ± 0.09    |  |  |  |  |  |  |
|                                                                 |  | 0.0000000196               |  |  |  |  |  |  |
|                                                                 |  | Inverse Isochron           |  |  |  |  |  |  |
|                                                                 |  | Recalibrated               |  |  |  |  |  |  |
|                                                                 |  | 294.92 ± 3.42              |  |  |  |  |  |  |
|                                                                 |  | ± 1.16%                    |  |  |  |  |  |  |
|                                                                 |  | 2.00541 ± 0.03502          |  |  |  |  |  |  |
|                                                                 |  | 5.44 ± 0.10                |  |  |  |  |  |  |
|                                                                 |  | ± 1.75%                    |  |  |  |  |  |  |
|                                                                 |  | Full External Error ± 0.16 |  |  |  |  |  |  |
|                                                                 |  | Analytical Error ± 0.09    |  |  |  |  |  |  |
|                                                                 |  | 0.0000000071               |  |  |  |  |  |  |
|                                                                 |  | 45%                        |  |  |  |  |  |  |
|                                                                 |  | 2.26                       |  |  |  |  |  |  |
|                                                                 |  | 1.0000                     |  |  |  |  |  |  |
|                                                                 |  | 253                        |  |  |  |  |  |  |
|                                                                 |  | Number of Iterations       |  |  |  |  |  |  |
|                                                                 |  | Convergence                |  |  |  |  |  |  |
|                                                                 |  | Spreading Factor           |  |  |  |  |  |  |



| OSU Argon Geochronology Lab |         |                |             |                |           |                 |           |                 |           |                 |           |                |           |                |           |                |           |                 |           |                 |           |                |           |                 |           |                |           |                |           |                |           |                |           |      |
|-----------------------------|---------|----------------|-------------|----------------|-----------|-----------------|-----------|-----------------|-----------|-----------------|-----------|----------------|-----------|----------------|-----------|----------------|-----------|-----------------|-----------|-----------------|-----------|----------------|-----------|-----------------|-----------|----------------|-----------|----------------|-----------|----------------|-----------|----------------|-----------|------|
| Degassing<br>Patterns       |         | 36Ar(a)<br>[V] | %1σ         | 36Ar(c)<br>[V] | %1σ       | 36Ar(ca)<br>[V] | %1σ       | 36Ar(cl)<br>[V] | %1σ       | 37Ar(ca)<br>[V] | %1σ       | 38Ar(a)<br>[V] | %1σ       | 38Ar(c)<br>[V] | %1σ       | 38Ar(k)<br>[V] | %1σ       | 38Ar(ca)<br>[V] | %1σ       | 38Ar(cl)<br>[V] | %1σ       | 39Ar(k)<br>[V] | %1σ       | 39Ar(ca)<br>[V] | %1σ       | 40Ar(r)<br>[V] | %1σ       | 40Ar(a)<br>[V] | %1σ       | 40Ar(c)<br>[V] | %1σ       | 40Ar(k)<br>[V] | %1σ       |      |
|                             | 13C2127 | 500 °C         | 0.0011107   | 1.74           | 0.0000000 | 0.00            | 0.0000016 | 3.58            | 0.0000000 | 45.12           | 0.0059504 | 3.58           | 0.0002076 | 1.74           | 0.0000000 | 0.00           | 0.0000876 | 0.45            | 0.0000008 | 3.58            | 0.0000647 | 45.44          | 0.0076998 | 0.45            | 0.0000040 | 3.58           | 0.0281286 | 20.30          | 0.3281996 | 1.74           | 0.0000000 | 0.00           | 0.0000078 | 0.45 |
|                             | 13C2129 | 600 °C         | ✓ 0.0025102 | 0.57           | 0.0000000 | 0.00            | 0.0000085 | 2.41            | 0.0000000 | 73.50           | 0.0321925 | 2.41           | 0.0004691 | 0.57           | 0.0000000 | 0.00           | 0.0004190 | 0.16            | 0.0000045 | 2.41            | 0.0000414 | 73.69          | 0.0368172 | 0.16            | 0.0000217 | 2.41           | 0.0704835 | 6.21           | 0.7417523 | 0.57           | 0.0000000 | 0.00           | 0.0000372 | 0.16 |
|                             | 13C2130 | 700 °C         | ✓ 0.0012729 | 1.45           | 0.0000000 | 0.00            | 0.0000178 | 2.40            | 0.0000000 | 21.65           | 0.0674809 | 2.40           | 0.0002379 | 1.45           | 0.0000000 | 0.00           | 0.0009416 | 0.19            | 0.0000094 | 2.40            | 0.0001086 | 22.31          | 0.0827373 | 0.19            | 0.0000454 | 2.40           | 0.1711294 | 3.20           | 0.3761387 | 1.45           | 0.0000000 | 0.00           | 0.0000836 | 0.19 |
|                             | 13C2132 | 800 °C         | ✓ 0.0006673 | 3.23           | 0.0000000 | 0.00            | 0.0000328 | 2.30            | 0.0000000 | 37.04           | 0.1244007 | 2.30           | 0.0001247 | 3.23           | 0.0000000 | 0.00           | 0.0020844 | 0.05            | 0.0000173 | 2.30            | 0.0000817 | 37.43          | 0.1831603 | 0.05            | 0.0000837 | 2.30           | 0.3667773 | 1.74           | 0.1971768 | 3.23           | 0.0000000 | 0.00           | 0.0001850 | 0.05 |
|                             | 13C2133 | 900 °C         | ✓ 0.0002545 | 8.13           | 0.0000000 | 0.00            | 0.0000305 | 2.30            | 0.0000000 | 24.70           | 0.1155284 | 2.30           | 0.0000476 | 8.13           | 0.0000000 | 0.00           | 0.0024038 | 0.15            | 0.0000161 | 2.30            | 0.0000904 | 25.28          | 0.2112330 | 0.15            | 0.0000778 | 2.30           | 0.4229282 | 1.45           | 0.0752076 | 8.13           | 0.0000000 | 0.00           | 0.0002133 | 0.15 |
|                             | 13C2135 | 1050 °C        | ✓ 0.0003354 | 9.12           | 0.0000000 | 0.00            | 0.0000405 | 2.31            | 0.0000001 | 10.44           | 0.1533263 | 2.31           | 0.0000627 | 9.12           | 0.0000000 | 0.00           | 0.0030847 | 0.18            | 0.0000213 | 2.31            | 0.0005036 | 11.75          | 0.2710604 | 0.18            | 0.0001032 | 2.31           | 0.5376452 | 1.68           | 0.0991085 | 9.12           | 0.0000000 | 0.00           | 0.0002738 | 0.18 |
|                             | 13C2136 | 1250 °C        | ✓ 0.0003335 | 9.30           | 0.0000000 | 0.00            | 0.0000401 | 2.36            | 0.0000001 | 10.12           | 0.1519160 | 2.36           | 0.0000623 | 9.30           | 0.0000000 | 0.00           | 0.0020728 | 0.18            | 0.0000211 | 2.36            | 0.0006191 | 11.46          | 0.1821459 | 0.18            | 0.0001022 | 2.36           | 0.3586408 | 2.56           | 0.0985440 | 9.30           | 0.0000000 | 0.00           | 0.0001840 | 0.18 |
|                             | 13C2138 | 1400 °C        | ✓ 0.0001113 | 14.83          | 0.0000000 | 0.00            | 0.0000189 | 2.37            | 0.0000001 | 16.06           | 0.0715603 | 2.37           | 0.0000208 | 14.83          | 0.0000000 | 0.00           | 0.0008373 | 0.19            | 0.0000099 | 2.37            | 0.0002610 | 16.94          | 0.0735777 | 0.19            | 0.0000482 | 2.37           | 0.1551340 | 3.14           | 0.0328871 | 14.83          | 0.0000000 | 0.00           | 0.0000743 | 0.19 |
|                             |         | Σ              | 0.0065957   | 0.96           | 0.0000000 | 0.00            | 0.0001907 | 0.95            | 0.0000004 | 6.24            | 0.7223555 | 0.95           | 0.0012327 | 0.96           | 0.0000000 | 0.00           | 0.0119312 | 0.07            | 0.0001004 | 0.95            | 0.0017706 | 6.76           | 1.0484316 | 0.07            | 0.0004861 | 0.95           | 2.1108669 | 0.89           | 1.9490146 | 0.96           | 0.0000000 | 0.00           | 0.0010589 | 0.07 |
|                             | Σ       |                |             |                |           |                 |           | 0.0067867       | 0.93      | 0.7223555       | 0.95      |                |           |                |           |                |           |                 |           | 0.0150349       | 0.80      |                |           | 1.0489177       | 0.07      |                |           |                |           |                |           | 4.0609404      | 0.65      |      |



| Additional<br>Parameters |         |   | 40Ar/39Ar | 1σ       | 37Ar/39Ar | 1σ       | 36Ar/39Ar | 1σ       | Time<br>(days) | 37Ar<br>(decay) | 39Ar<br>(decay) | 40Ar<br>(moles) |
|--------------------------|---------|---|-----------|----------|-----------|----------|-----------|----------|----------------|-----------------|-----------------|-----------------|
| 13C2127                  | 500 °C  |   | 46.254493 | 0.208479 | 0.772394  | 0.027844 | 0.144376  | 0.002589 | 114.881        | 9.694924        | 1.00081181      | 7.127E-14       |
| 13C2129                  | 600 °C  | ✓ | 22.049343 | 0.049159 | 0.873874  | 0.021071 | 0.068370  | 0.000402 | 114.917        | 9.701708        | 1.00081206      | 1.625E-13       |
| 13C2130                  | 700 °C  | ✓ | 6.611906  | 0.012643 | 0.815156  | 0.019604 | 0.015592  | 0.000225 | 114.938        | 9.705835        | 1.00081222      | 1.095E-13       |
| 13C2132                  | 800 °C  | ✓ | 3.078623  | 0.002205 | 0.678880  | 0.015640 | 0.003821  | 0.000118 | 114.975        | 9.712893        | 1.00081248      | 1.128E-13       |
| 13C2133                  | 900 °C  | ✓ | 2.358371  | 0.004063 | 0.546723  | 0.012627 | 0.001349  | 0.000098 | 114.993        | 9.716358        | 1.00081260      | 9.967E-14       |
| 13C2135                  | 1050 °C | ✓ | 2.349237  | 0.004558 | 0.565438  | 0.013085 | 0.001387  | 0.000113 | 115.028        | 9.723157        | 1.00081285      | 1.274E-13       |
| 13C2136                  | 1250 °C | ✓ | 2.509593  | 0.004719 | 0.833567  | 0.019696 | 0.002051  | 0.000170 | 115.047        | 9.726625        | 1.00081298      | 9.147E-14       |
| 13C2138                  | 1400 °C | ✓ | 2.554747  | 0.005117 | 0.971946  | 0.023110 | 0.001769  | 0.000224 | 115.083        | 9.733565        | 1.00081324      | 3.762E-14       |



| Procedure<br>Blanks |         | 36Ar<br>[V] | 1σ        | 37Ar<br>[V] | 1σ        | 38Ar<br>[V] | 1σ        | 39Ar<br>[V] | 1σ        | 40Ar<br>[V] | 1σ        |
|---------------------|---------|-------------|-----------|-------------|-----------|-------------|-----------|-------------|-----------|-------------|-----------|
| 13C2127             | 500 °C  | 0.0003395   | 0.0000128 | 0.0000016   | 0.0000041 | 0.0000129   | 0.0000064 | 0.0000329   | 0.0000205 | 0.0018178   | 0.0000481 |
| 13C2129             | 600 °C  | 0.0003701   | 0.0000100 | 0.0000083   | 0.0000107 | 0.0000000   | 0.0000148 | 0.0000543   | 0.0000191 | 0.0015842   | 0.0000319 |
| 13C2130             | 700 °C  | 0.0003701   | 0.0000100 | 0.0000083   | 0.0000107 | 0.0000000   | 0.0000148 | 0.0000543   | 0.0000191 | 0.0015842   | 0.0000319 |
| 13C2132             | 800 °C  | 0.0002941   | 0.0000109 | 0.0000136   | 0.0000226 | 0.0000568   | 0.0000135 | 0.0000728   | 0.0000145 | 0.0014793   | 0.0000192 |
| 13C2133             | 900 °C  | 0.0002941   | 0.0000109 | 0.0000136   | 0.0000226 | 0.0000568   | 0.0000135 | 0.0000728   | 0.0000145 | 0.0014793   | 0.0000192 |
| 13C2135             | 1050 °C | 0.0002916   | 0.0000127 | 0.0000211   | 0.0000135 | 0.0000088   | 0.0000192 | 0.0000799   | 0.0000281 | 0.0013768   | 0.0000295 |
| 13C2136             | 1250 °C | 0.0002916   | 0.0000127 | 0.0000211   | 0.0000135 | 0.0000088   | 0.0000192 | 0.0000799   | 0.0000281 | 0.0013768   | 0.0000295 |
| 13C2138             | 1400 °C | 0.0003183   | 0.0000105 | 0.0000235   | 0.0000161 | 0.0000220   | 0.0000155 | 0.0001097   | 0.0000193 | 0.0018933   | 0.0000441 |



| OSU Argon Geochronology Lab |         |           |           |        |            |           |           |        |           |           |           |        |           |           |           |        |           |           |           |        |             |
|-----------------------------|---------|-----------|-----------|--------|------------|-----------|-----------|--------|-----------|-----------|-----------|--------|-----------|-----------|-----------|--------|-----------|-----------|-----------|--------|-------------|
| Intercept Values            |         | 36Ar      |           |        |            | 37Ar      |           |        |           | 38Ar      |           |        |           | 39Ar      |           |        |           | 40Ar      |           |        |             |
|                             |         | [V]       | 1σ        | r2     |            | [V]       | 1σ        | r2     |           | [V]       | 1σ        | r2     |           | [V]       | 1σ        | r2     |           | [V]       | 1σ        | r2     |             |
| 13C2127                     | 500 °C  | 0.0014855 | 0.0000151 | 0.8565 | LIN #      | 0.0006294 | 0.0000168 | 0.0546 | LIN # 6   | 0.0003535 | 0.0000285 | 0.1247 | LIN #     | 0.0077989 | 0.0000279 | 0.9649 | EXP #     | 0.3588356 | 0.0001990 | 0.9992 | EXP # 1 9   |
| 13C2129                     | 600 °C  | 0.0029645 | 0.0000102 | 0.9854 | LIN # 5 7  | 0.0034023 | 0.0000244 | 0.8755 | EXP #     | 0.0009489 | 0.0000269 | 0.0489 | LIN #     | 0.0371900 | 0.0000570 | 0.9843 | EXP #     | 0.8154065 | 0.0012223 | 0.9969 | EXP # 2 3 8 |
| 13C2130                     | 700 °C  | 0.0017000 | 0.0000161 | 0.8909 | LIN # 3 5  | 0.0071196 | 0.0000529 | 0.9569 | LIN # 2 8 | 0.0013181 | 0.0000173 | 0.9062 | LIN # 3   | 0.0835039 | 0.0001529 | 0.9971 | EXP # 3 6 | 0.5499809 | 0.0002147 | 0.9996 | EXP # 1 2   |
| 13C2132                     | 800 °C  | 0.0010155 | 0.0000193 | 0.0916 | LIN # 7    | 0.0131124 | 0.0000410 | 0.9913 | EXP #     | 0.0024014 | 0.0000269 | 0.8849 | LIN #     | 0.1847743 | 0.0000784 | 0.9998 | EXP # 1   | 0.5666384 | 0.0002745 | 0.9992 | EXP # 1 8   |
| 13C2133                     | 900 °C  | 0.0005881 | 0.0000183 | 0.6266 | LIN # 1    | 0.0121739 | 0.0000381 | 0.9921 | EXP #     | 0.0026552 | 0.0000166 | 0.9612 | LIN # 5   | 0.2130643 | 0.0003180 | 0.9980 | EXP #     | 0.5007298 | 0.0004006 | 0.9966 | EXP # 1     |
| 13C2135                     | 1050 °C | 0.0006793 | 0.0000288 | 0.4085 | LIN # 8 11 | 0.0161503 | 0.0000593 | 0.9863 | EXP #     | 0.0037394 | 0.0000407 | 0.8751 | LIN #     | 0.2734276 | 0.0004806 | 0.9972 | EXP #     | 0.6396196 | 0.0004825 | 0.9974 | EXP # 1     |
| 13C2136                     | 1250 °C | 0.0006770 | 0.0000293 | 0.4414 | LIN #      | 0.0159962 | 0.0000961 | 0.9617 | EXP #     | 0.0028282 | 0.0000498 | 0.6328 | LIN # 4 9 | 0.1837959 | 0.0003200 | 0.9978 | EXP # 1 7 | 0.4596188 | 0.0002843 | 0.9982 | EXP # 1 4   |
| 13C2138                     | 1400 °C | 0.0004530 | 0.0000134 | 0.5739 | LIN #      | 0.0075425 | 0.0000467 | 0.9703 | EXP #     | 0.0011689 | 0.0000368 | 0.6552 | LIN # 2   | 0.0743212 | 0.0001384 | 0.9967 | EXP #     | 0.1903313 | 0.0001071 | 0.9957 | EXP # 1     |



| OSU Argon Geochronology Lab |         |         |           |            |                   |              |      |               |                  |       |                     |                    |     |            |       |               |     |         |       |              |                        |     |       |      |      |     |        |             |       |       |         |           |            |     |
|-----------------------------|---------|---------|-----------|------------|-------------------|--------------|------|---------------|------------------|-------|---------------------|--------------------|-----|------------|-------|---------------|-----|---------|-------|--------------|------------------------|-----|-------|------|------|-----|--------|-------------|-------|-------|---------|-----------|------------|-----|
| Sample Parameters           |         |         | Sample    | Material   | Location          | Analyst      | Temp | Standard Name | Standard (in Ma) | %1σ   | Standard Reference  | Standard 40Ar/39Ar | %1σ | J          | %1σ   | Air 40Ar/36Ar | %1σ | MDF     | %1σ   | Volume Ratio | Sensitivity (mol/volt) | Day | Month | Year | Hour | Min | Resist | Irradiation | X-pos | Y-pos | Z/H-pos | Project   | Experiment | Nmb |
|                             | 13C2127 | 500 °C  | 1180042-1 | Groundmass | Kerguelen Plateau | Trevor Smith | 500  | FCT-3         | 28.201           | 0.083 | Kuiper et al., 2008 |                    |     | 0.00150670 | 0.269 |               |     | 1.00697 | 0.030 | 0.9981       | 2E-13                  | 29  | JUL   | 2013 | 13   | 10  | 1      | OSU2C13     | 0.00  | 0.00  | 53.90   | Kerguelen | 13C2127    | 01  |
|                             | 13C2129 | 600 °C  | 1180042-1 | Groundmass | Kerguelen Plateau | Trevor Smith | 600  | FCT-3         | 28.201           | 0.083 | Kuiper et al., 2008 |                    |     | 0.00150670 | 0.269 |               |     | 1.00697 | 0.030 | 0.9981       | 2E-13                  | 29  | JUL   | 2013 | 14   | 1   | 1      | OSU2C13     | 0.00  | 0.00  | 53.90   | Kerguelen | 13C2127    | 01  |
|                             | 13C2130 | 700 °C  | 1180042-1 | Groundmass | Kerguelen Plateau | Trevor Smith | 700  | FCT-3         | 28.201           | 0.083 | Kuiper et al., 2008 |                    |     | 0.00150670 | 0.269 |               |     | 1.00697 | 0.030 | 0.9981       | 2E-13                  | 29  | JUL   | 2013 | 14   | 32  | 1      | OSU2C13     | 0.00  | 0.00  | 53.90   | Kerguelen | 13C2127    | 01  |
|                             | 13C2132 | 800 °C  | 1180042-1 | Groundmass | Kerguelen Plateau | Trevor Smith | 800  | FCT-3         | 28.201           | 0.083 | Kuiper et al., 2008 |                    |     | 0.00150670 | 0.269 |               |     | 1.00697 | 0.030 | 0.9982       | 2E-13                  | 29  | JUL   | 2013 | 15   | 25  | 1      | OSU2C13     | 0.00  | 0.00  | 53.90   | Kerguelen | 13C2127    | 01  |
|                             | 13C2133 | 900 °C  | 1180042-1 | Groundmass | Kerguelen Plateau | Trevor Smith | 900  | FCT-3         | 28.201           | 0.083 | Kuiper et al., 2008 |                    |     | 0.00150670 | 0.269 |               |     | 1.00697 | 0.030 | 0.9982       | 2E-13                  | 29  | JUL   | 2013 | 15   | 51  | 1      | OSU2C13     | 0.00  | 0.00  | 53.90   | Kerguelen | 13C2127    | 01  |
|                             | 13C2135 | 1050 °C | 1180042-1 | Groundmass | Kerguelen Plateau | Trevor Smith | 1050 | FCT-3         | 28.201           | 0.083 | Kuiper et al., 2008 |                    |     | 0.00150670 | 0.269 |               |     | 1.00697 | 0.030 | 0.9981       | 2E-13                  | 29  | JUL   | 2013 | 16   | 42  | 1      | OSU2C13     | 0.00  | 0.00  | 53.90   | Kerguelen | 13C2127    | 01  |
|                             | 13C2136 | 1250 °C | 1180042-1 | Groundmass | Kerguelen Plateau | Trevor Smith | 1250 | FCT-3         | 28.201           | 0.083 | Kuiper et al., 2008 |                    |     | 0.00150670 | 0.269 |               |     | 1.00697 | 0.030 | 0.9981       | 2E-13                  | 29  | JUL   | 2013 | 17   | 8   | 1      | OSU2C13     | 0.00  | 0.00  | 53.90   | Kerguelen | 13C2127    | 01  |
|                             | 13C2138 | 1400 °C | 1180042-1 | Groundmass | Kerguelen Plateau | Trevor Smith | 1400 | FCT-3         | 28.201           | 0.083 | Kuiper et al., 2008 |                    |     | 0.00150670 | 0.269 |               |     | 1.00697 | 0.030 | 0.9982       | 2E-13                  | 29  | JUL   | 2013 | 18   | 0   | 1      | OSU2C13     | 0.00  | 0.00  | 53.90   | Kerguelen | 13C2127    | 01  |



| Irradiation<br>Constants |         | OSU Argon Geochronology Lab |     |          |     |          |     |          |     |           |     |           |     |           |     |          |     |          |     |           |     |      |     |      |     |       |     |  |
|--------------------------|---------|-----------------------------|-----|----------|-----|----------|-----|----------|-----|-----------|-----|-----------|-----|-----------|-----|----------|-----|----------|-----|-----------|-----|------|-----|------|-----|-------|-----|--|
|                          |         | 40/36(a)                    | %1σ | 40/36(c) | %1σ | 38/36(a) | %1σ | 38/36(c) | %1σ | 39/37(ca) | %1σ | 38/37(ca) | %1σ | 36/37(ca) | %1σ | 40/39(k) | %1σ | 38/39(k) | %1σ | 36/38(cl) | %1σ | K/Ca | %1σ | K/Cl | %1σ | Ca/Cl | %1σ |  |
| 13C2127                  | 500 °C  | 295.5                       | 0   | 0.018    | 35  | 0.1869   | 0   | 1.493    | 3   | 0.000673  | 0   | 0.000139  | 0   | 0.000264  | 0   | 0.00101  | 0   | 0.01138  | 0   | 0         | 0   | 0.43 | 0   | 0    | 0   | 0     | 0   |  |
| 13C2129                  | 600 °C  | 295.5                       | 0   | 0.018    | 35  | 0.1869   | 0   | 1.493    | 3   | 0.000673  | 0   | 0.000139  | 0   | 0.000264  | 0   | 0.00101  | 0   | 0.01138  | 0   | 0         | 0   | 0.43 | 0   | 0    | 0   | 0     | 0   |  |
| 13C2130                  | 700 °C  | 295.5                       | 0   | 0.018    | 35  | 0.1869   | 0   | 1.493    | 3   | 0.000673  | 0   | 0.000139  | 0   | 0.000264  | 0   | 0.00101  | 0   | 0.01138  | 0   | 0         | 0   | 0.43 | 0   | 0    | 0   | 0     | 0   |  |
| 13C2132                  | 800 °C  | 295.5                       | 0   | 0.018    | 35  | 0.1869   | 0   | 1.493    | 3   | 0.000673  | 0   | 0.000139  | 0   | 0.000264  | 0   | 0.00101  | 0   | 0.01138  | 0   | 0         | 0   | 0.43 | 0   | 0    | 0   | 0     | 0   |  |
| 13C2133                  | 900 °C  | 295.5                       | 0   | 0.018    | 35  | 0.1869   | 0   | 1.493    | 3   | 0.000673  | 0   | 0.000139  | 0   | 0.000264  | 0   | 0.00101  | 0   | 0.01138  | 0   | 0         | 0   | 0.43 | 0   | 0    | 0   | 0     | 0   |  |
| 13C2135                  | 1050 °C | 295.5                       | 0   | 0.018    | 35  | 0.1869   | 0   | 1.493    | 3   | 0.000673  | 0   | 0.000139  | 0   | 0.000264  | 0   | 0.00101  | 0   | 0.01138  | 0   | 0         | 0   | 0.43 | 0   | 0    | 0   | 0     | 0   |  |
| 13C2136                  | 1250 °C | 295.5                       | 0   | 0.018    | 35  | 0.1869   | 0   | 1.493    | 3   | 0.000673  | 0   | 0.000139  | 0   | 0.000264  | 0   | 0.00101  | 0   | 0.01138  | 0   | 0         | 0   | 0.43 | 0   | 0    | 0   | 0     | 0   |  |
| 13C2138                  | 1400 °C | 295.5                       | 0   | 0.018    | 35  | 0.1869   | 0   | 1.493    | 3   | 0.000673  | 0   | 0.000139  | 0   | 0.000264  | 0   | 0.00101  | 0   | 0.01138  | 0   | 0         | 0   | 0.43 | 0   | 0    | 0   | 0     | 0   |  |



13C2127.AGE >>> 1180042-1 >>> KERGUELEN PROJECT

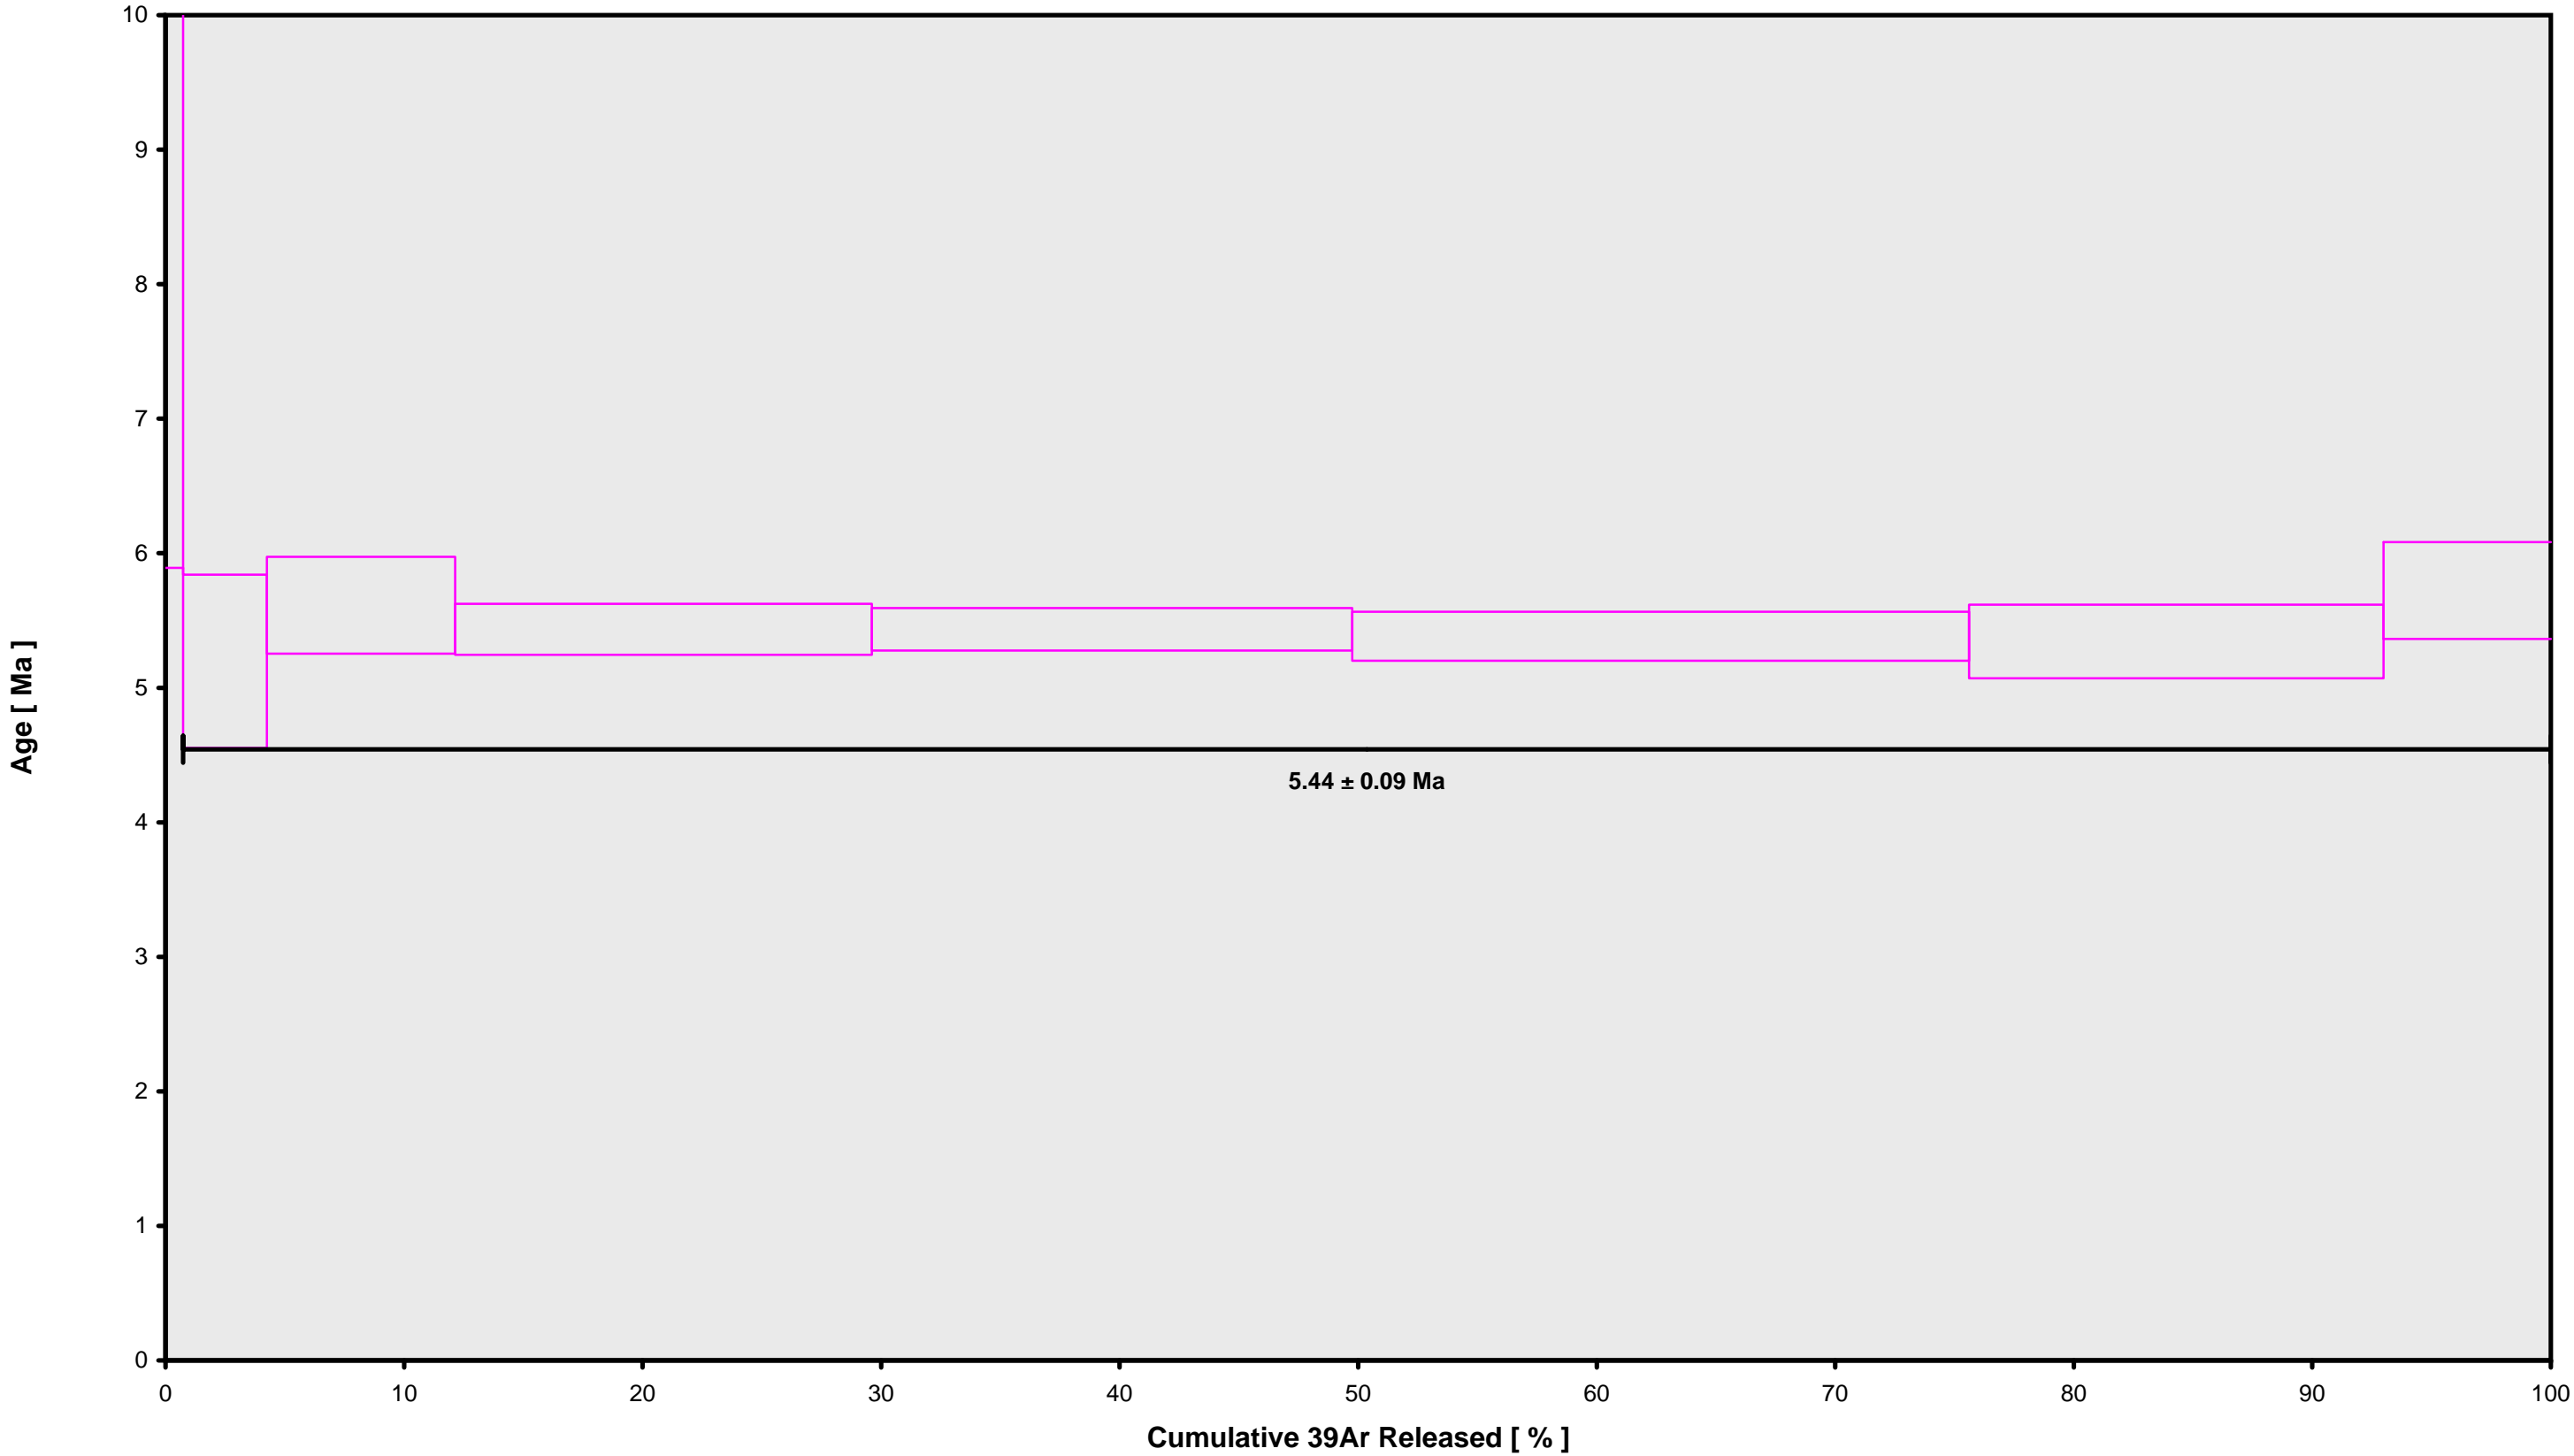

Ar-Ages in Ma

WEIGHTED PLATEAU

5.44 ± 0.09

TOTAL FUSION

5.46 ± 0.10

NORMAL ISOCHRON

5.43 ± 0.10

INVERSE ISOCHRON

5.44 ± 0.10

MSWD (PROBABILITY)

0.81 (56%)

Sample Info

Groundmass

Kerguelen Plateau

Trevor Smith

IRR = OSU2C13

J = 0.00150670 ± 0.00000405

RECALIBRATED AGE



13C2127.AGE >>> 1180042-1 >>> KERGUELEN PROJECT

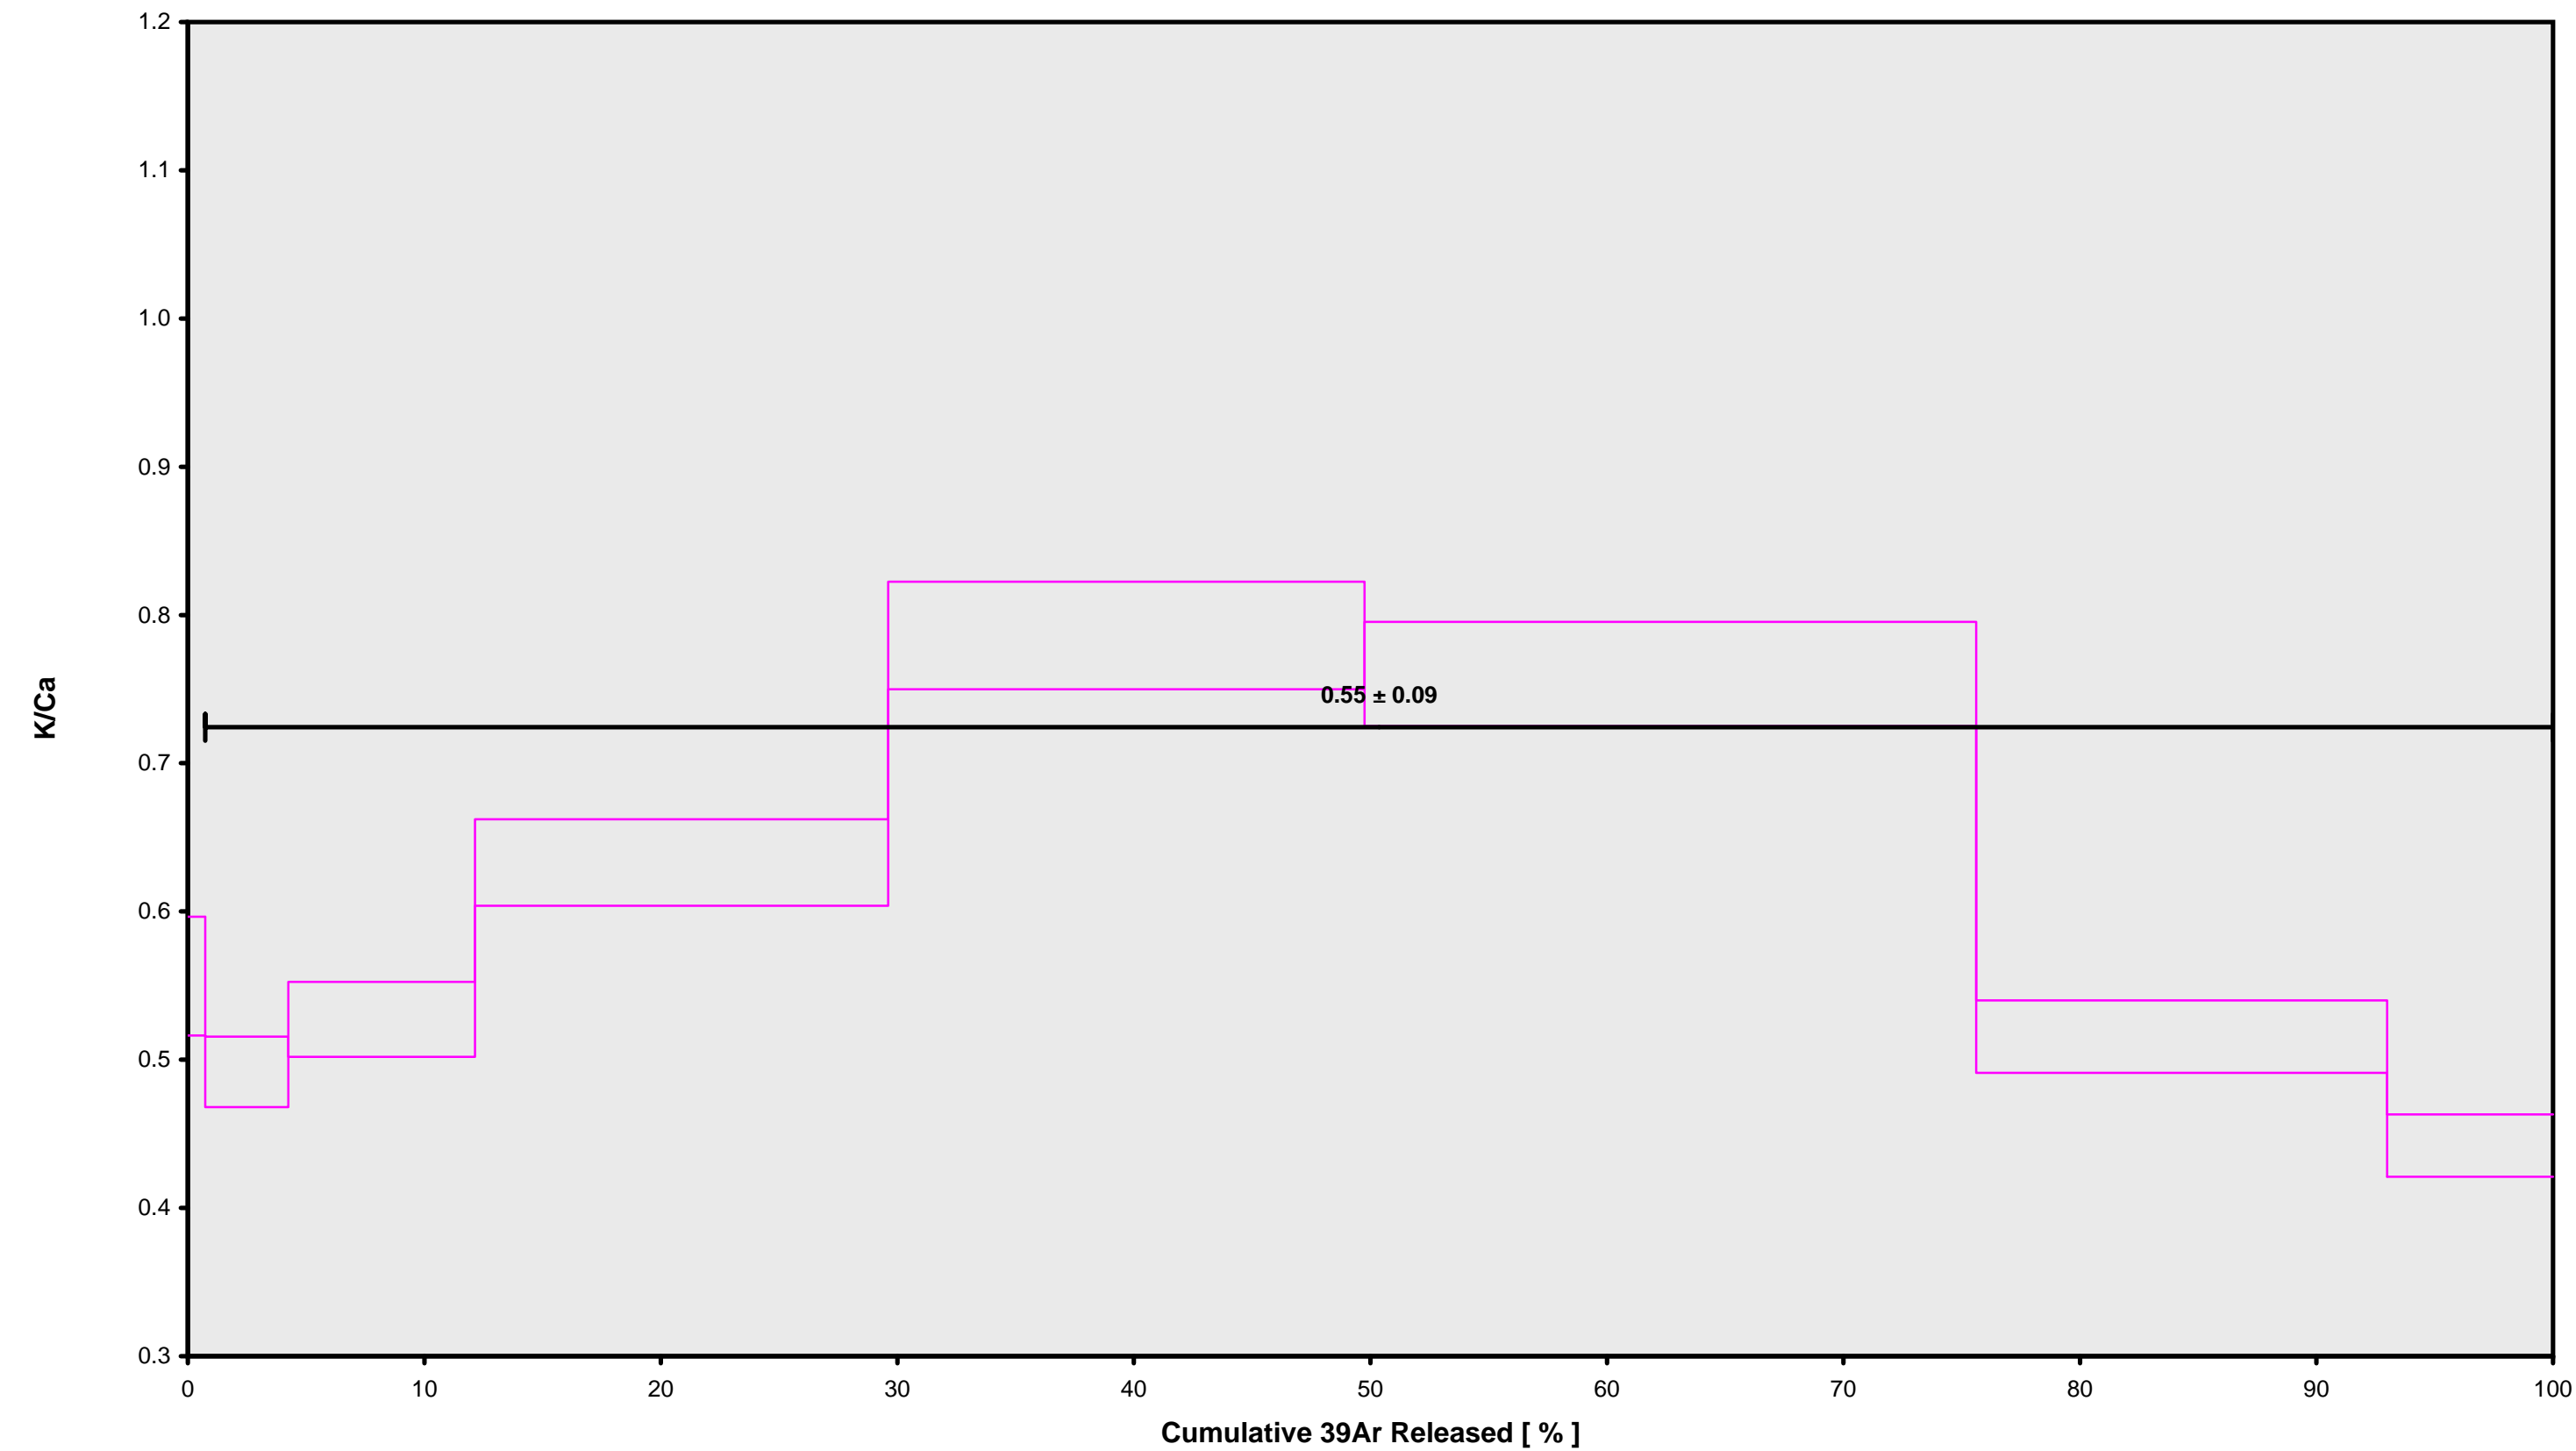

**Ar-Ages in Ma**

**WEIGHTED PLATEAU**  
5.44  $\pm$  0.09

**TOTAL FUSION**  
5.46  $\pm$  0.10

**NORMAL ISOCHRON**  
5.43  $\pm$  0.10

**INVERSE ISOCHRON**  
5.44  $\pm$  0.10

**Sample Info**

**Groundmass**  
**Kerguelen Plateau**  
**Trevor Smith**

**IRR = OSU2C13**  
**J = 0.00150670  $\pm$  0.00000405**

**RECALIBRATED AGE**



13C2127.AGE >>> 1180042-1 >>> KERGUELEN PROJECT

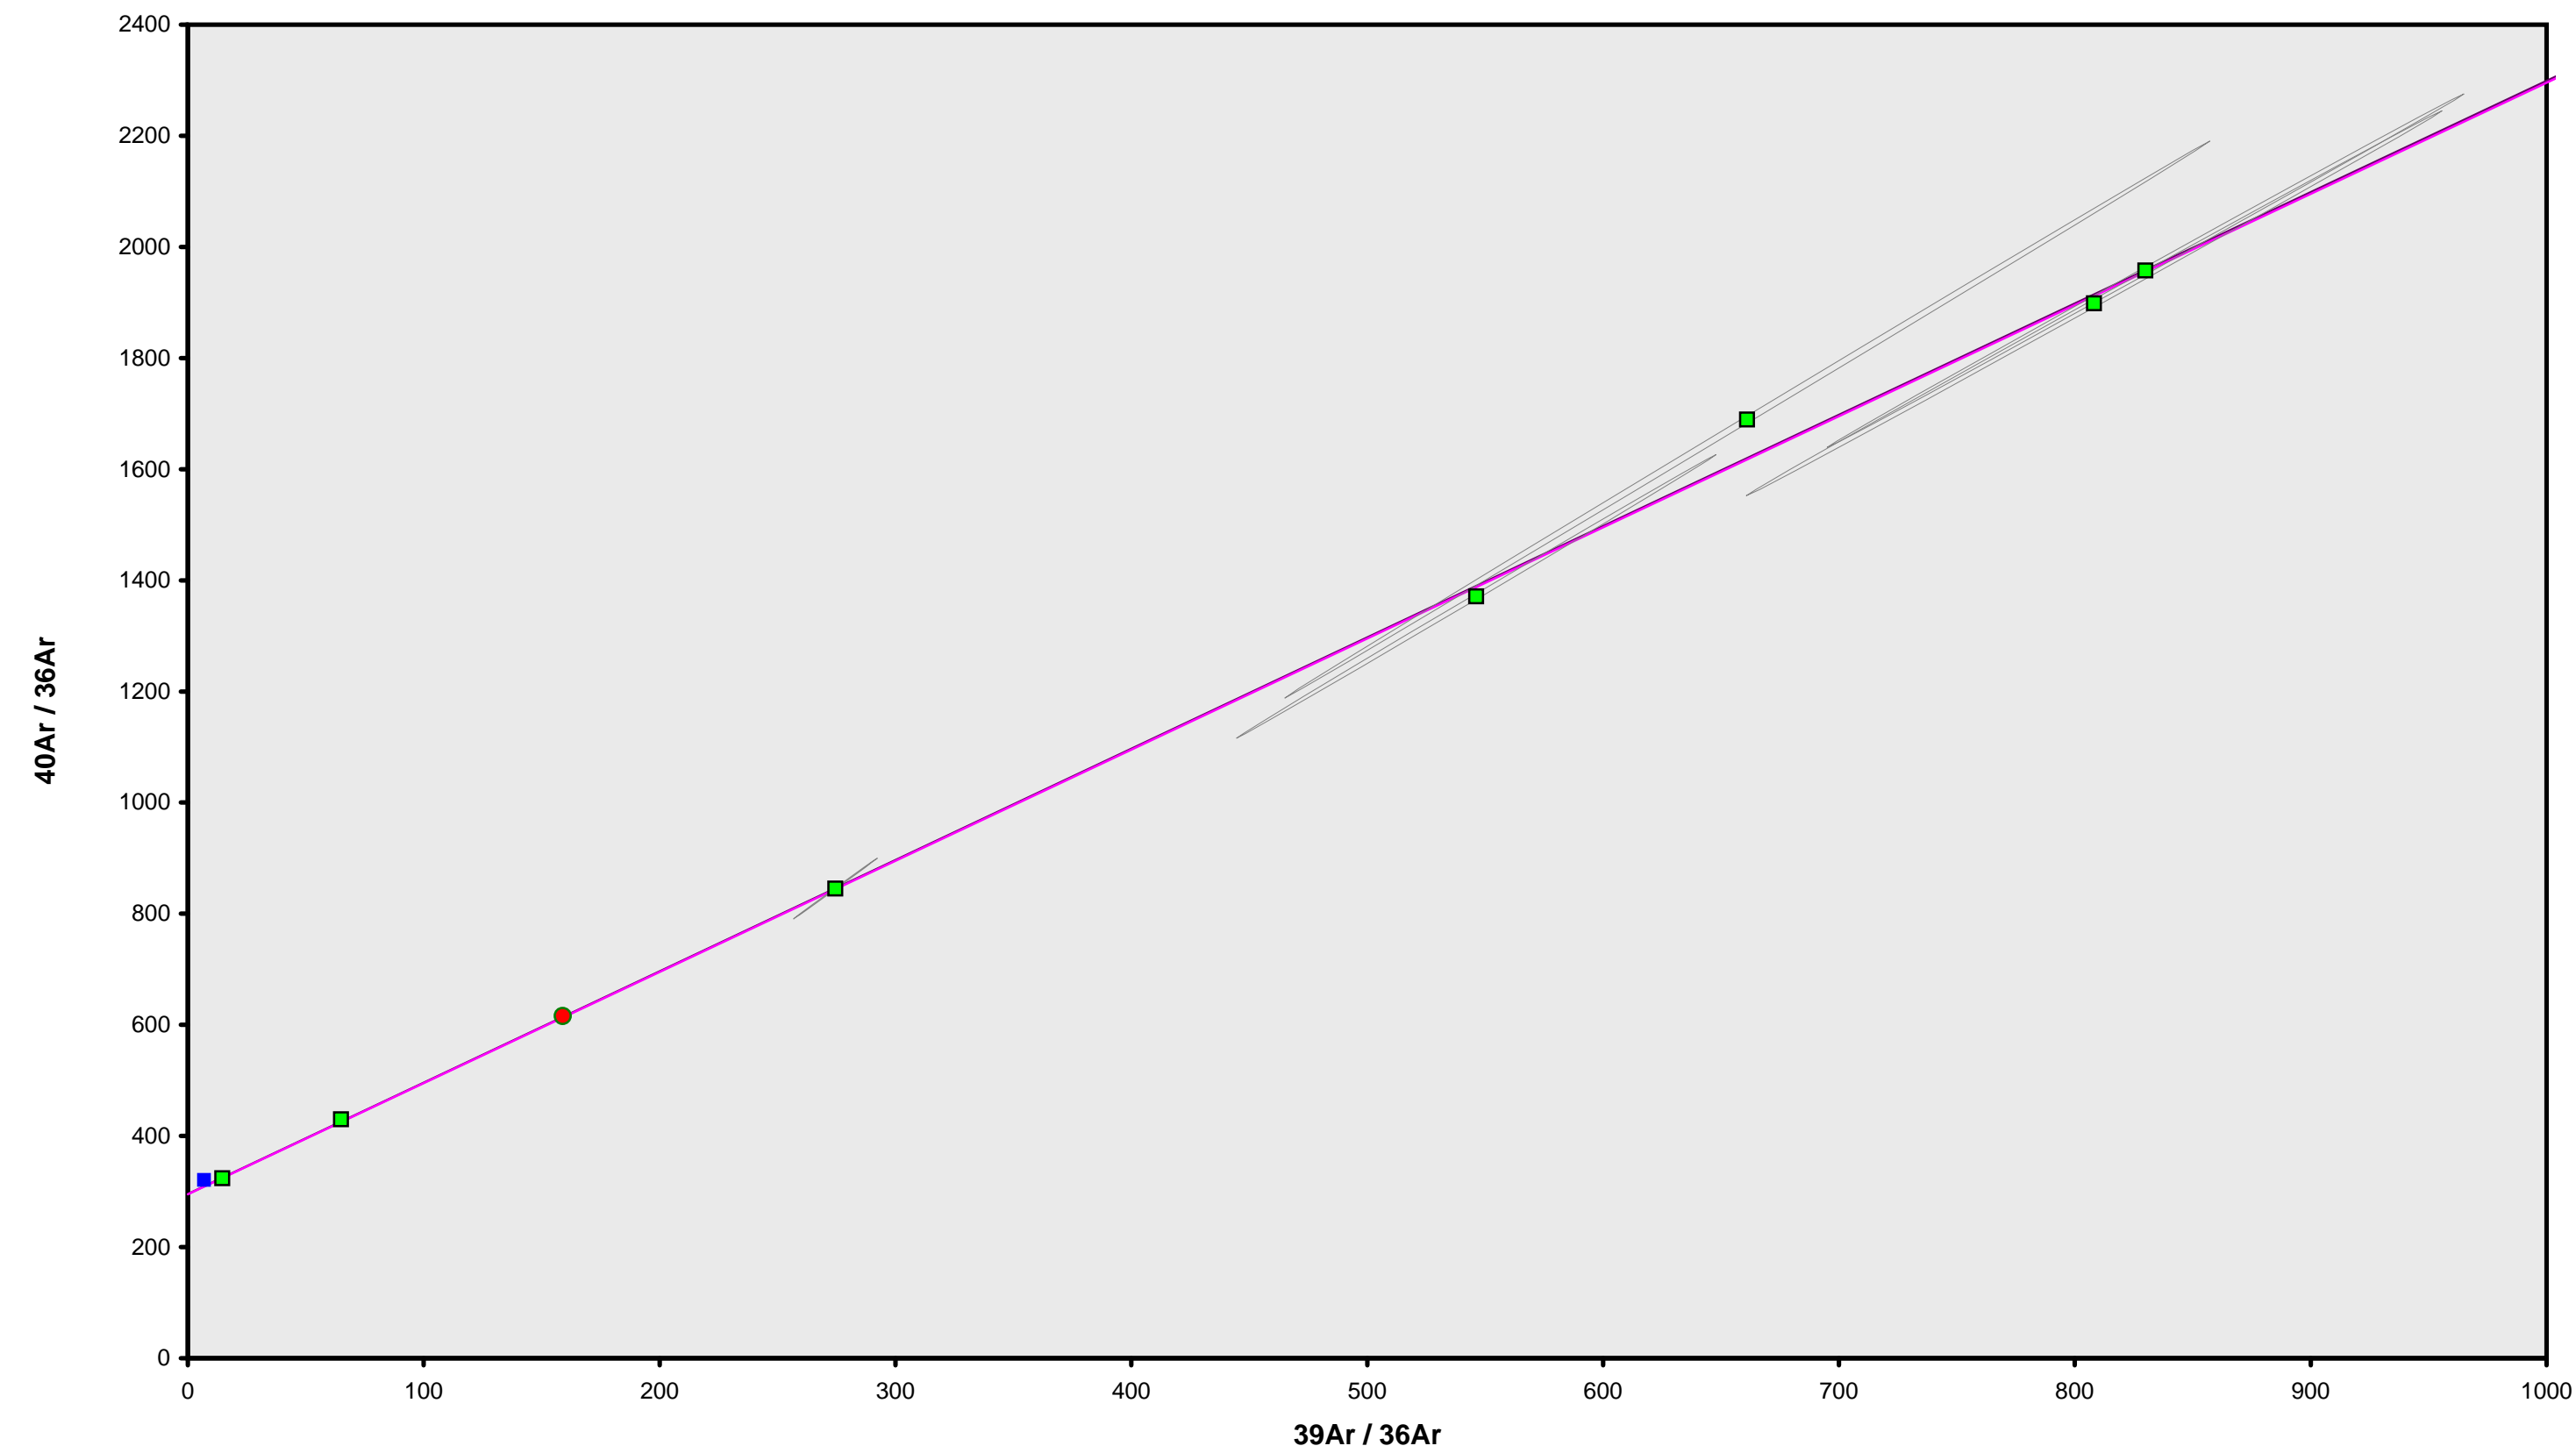

**Ar-Ages in Ma**

**WEIGHTED PLATEAU**  
5.44 ± 0.09

**TOTAL FUSION**  
5.46 ± 0.10

**NORMAL ISOCHRON**  
5.43 ± 0.10

**INVERSE ISOCHRON**  
5.44 ± 0.10

**MSWD (PROBABILITY)**  
0.78 (57%)

**40AR/36AR INTERCEPT**  
295.0 ± 3.4

**Sample Info**

Groundmass  
Kerguelen Plateau  
Trevor Smith

IRR = OSU2C13  
J = 0.00150670 ± 0.00000405

**RECALIBRATED AGE**



13C2127.AGE >>> 1180042-1 >>> KERGUELEN PROJECT

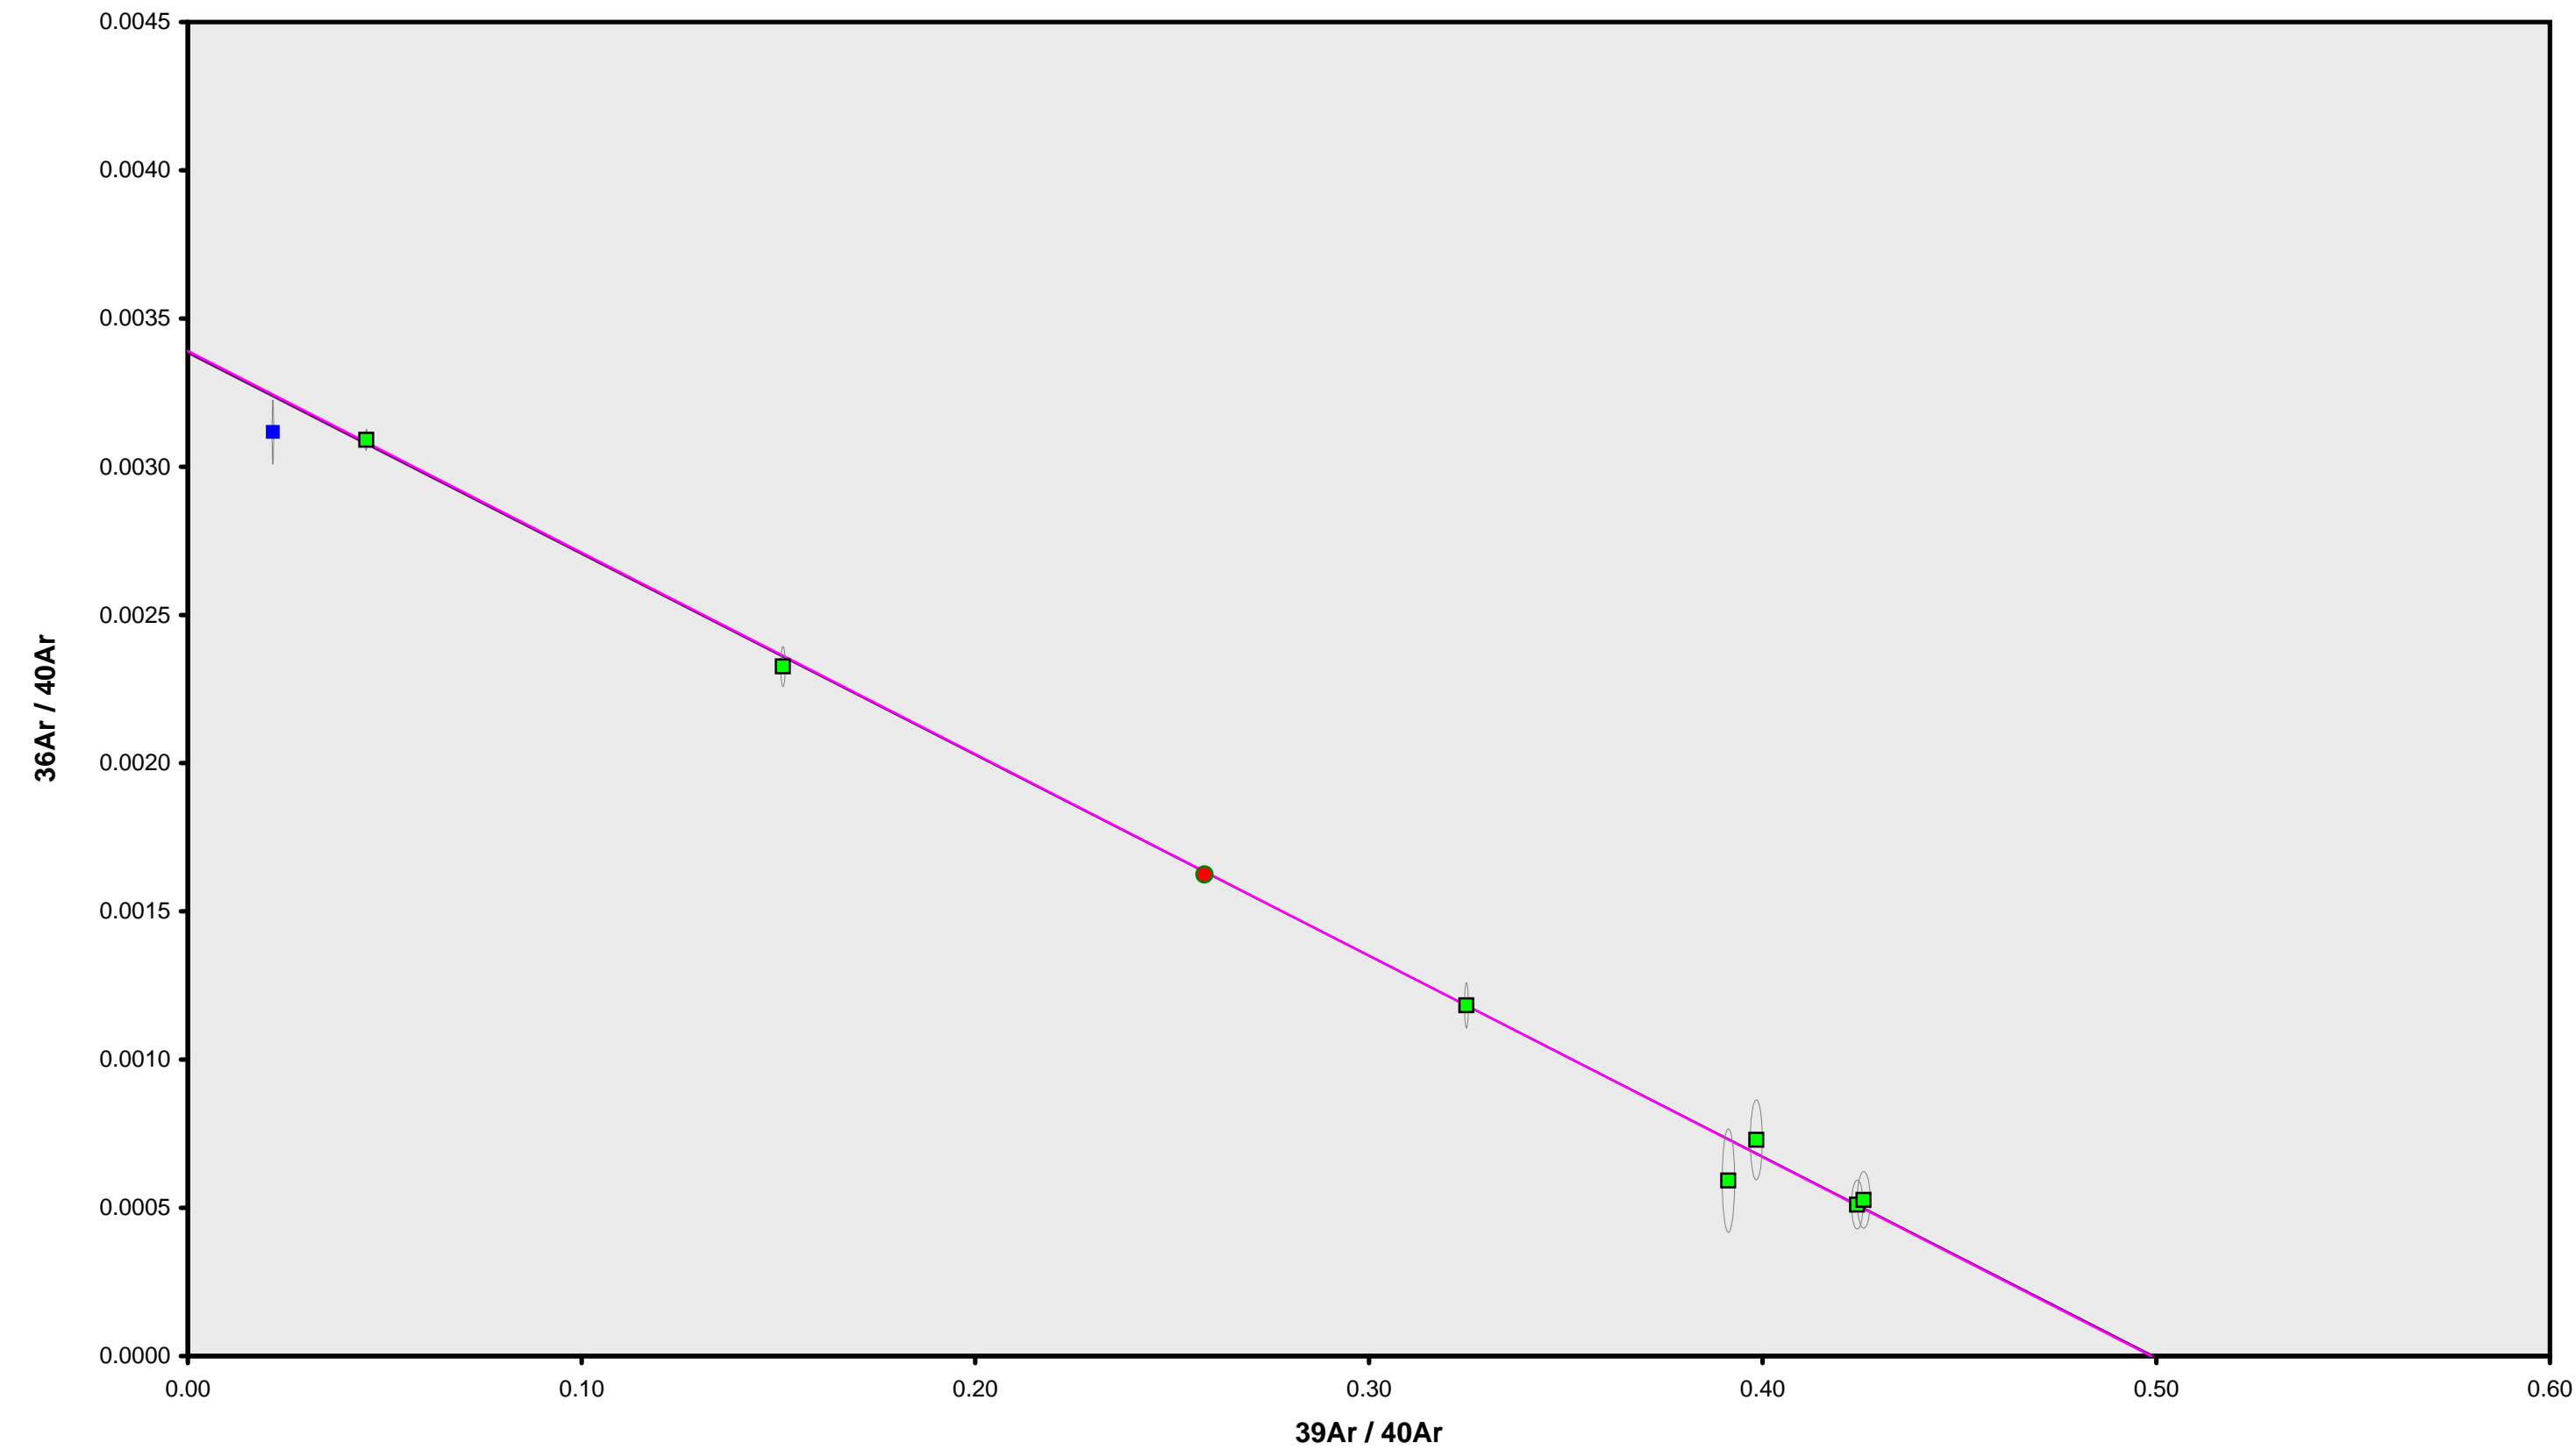

Ar-Ages in Ma

WEIGHTED PLATEAU

5.44 ± 0.09

TOTAL FUSION

5.46 ± 0.10

NORMAL ISOCHRON

5.43 ± 0.10

INVERSE ISOCHRON

5.44 ± 0.10

MSWD (PROBABILITY)

0.95 (45%)

SPREADING FACTOR

76.3%

40AR/36AR INTERCEPT

294.9 ± 3.4

Sample Info

Groundmass

Kerguelen Plateau

Trevor Smith

IRR = OSU2C13

J = 0.00150670 ± 0.00000405

RECALIBRATED AGE



| Incremental Heating |         |   | 36Ar(a)<br>[V] | 37Ar(ca)<br>[V] | 38Ar(cl)<br>[V] | 39Ar(k)<br>[V] | 40Ar(r)<br>[V] | Age ± 2σ<br>(Ma) | 40Ar(r)<br>(%) | 39Ar(k)<br>(%) | K/Ca ± 2σ     |
|---------------------|---------|---|----------------|-----------------|-----------------|----------------|----------------|------------------|----------------|----------------|---------------|
| 13C2114             | 500 °C  | ✓ | 0.0010336      | 0.0042081       | 0.0000047       | 0.0028719      | 0.0173754      | 16.56 ± 17.76    | 5.38           | 0.51           | 0.293 ± 0.056 |
| 13C2116             | 600 °C  | ✓ | 0.0023463      | 0.0098100       | 0.0000539       | 0.0085463      | 0.0498939      | 15.98 ± 4.09     | 6.71           | 1.52           | 0.375 ± 0.031 |
| 13C2117             | 700 °C  | ✓ | 0.0017299      | 0.0177311       | 0.0000845       | 0.0172159      | 0.1148391      | 18.25 ± 2.51     | 18.34          | 3.05           | 0.418 ± 0.030 |
| 13C2119             | 800 °C  | ✓ | 0.0030378      | 0.0750281       | 0.0001936       | 0.0670451      | 0.4243760      | 17.32 ± 0.73     | 32.10          | 11.89          | 0.384 ± 0.018 |
| 13C2120             | 900 °C  | ✓ | 0.0019276      | 0.0985418       | 0.0002220       | 0.1174482      | 0.7465803      | 17.39 ± 0.51     | 56.72          | 20.83          | 0.513 ± 0.024 |
| 13C2122             | 1050 °C | ✓ | 0.0008232      | 0.1377986       | 0.0004308       | 0.1872919      | 1.2105523      | 17.68 ± 0.21     | 83.26          | 33.21          | 0.584 ± 0.027 |
| 13C2123             | 1250 °C | ✓ | 0.0003336      | 0.1590413       | 0.0005341       | 0.1265170      | 0.8013138      | 17.33 ± 0.35     | 89.03          | 22.44          | 0.342 ± 0.016 |
| 13C2125             | 1400 °C | ✓ | 0.0000637      | 0.0613072       | 0.0001577       | 0.0369595      | 0.2393831      | 17.72 ± 1.29     | 92.70          | 6.55           | 0.259 ± 0.012 |
| Σ                   |         |   | 0.0112956      | 0.5634660       | 0.0016813       | 0.5638959      | 3.6043140      |                  |                |                |               |

| Information on Analysis       |                                                |                         |                            |                     |                     |               |
|-------------------------------|------------------------------------------------|-------------------------|----------------------------|---------------------|---------------------|---------------|
|                               | Results                                        | 40(r)/39(k) ± 2σ        | Age ± 2σ (Ma)              | MSWD                | 39Ar(k) (%,n)       | K/Ca ± 2σ     |
| Sample = 1180011-2            | <b>Age Plateau</b><br><b>Recalibrated</b>      | 6.41870 ± 0.05962       | 17.56 ± 0.19               | 0.71                | 100.00              | 0.357 ± 0.074 |
| Material = Groundmass         |                                                | ± 0.93%                 | ± 1.06%                    | 66%                 | 8                   |               |
| Location = Kerguelen Plateau  |                                                |                         | Full External Error ± 0.44 | 2.07                | 2σ Confidence Limit |               |
| Analyst = Kyle Krawl          |                                                | Analytical Error ± 0.16 | 1.0000                     | Error Magnification |                     |               |
| Project = KERGUELEN           |                                                |                         |                            |                     |                     |               |
| Mass Discrimination Law = LIN | <b>Total Fusion Age</b><br><b>Recalibrated</b> | 6.39181 ± 0.08619       | 17.49 ± 0.25               |                     | 8                   | 0.430 ± 0.009 |
| Irradiation = OSU2C13         |                                                | ± 1.35%                 | ± 1.44%                    |                     |                     |               |
| J = 0.00152397 ± 0.00000405   |                                                |                         | Full External Error ± 0.47 |                     |                     |               |
| FCT-3 = 28.201 ± 0.023 Ma     |                                                | Analytical Error ± 0.23 |                            |                     |                     |               |
|                               |                                                |                         |                            |                     |                     |               |



| Normal Isochron |         |   | 39(k)/36(a) ± 2σ | 40(a+r)/36(a) ± 2σ | r.i.   |
|-----------------|---------|---|------------------|--------------------|--------|
| 13C2114         | 500 °C  | ✓ | 2.78 ± 0.18      | 312.31 ± 19.12     | 0.9145 |
| 13C2116         | 600 °C  | ✓ | 3.64 ± 0.08      | 316.76 ± 5.84      | 0.8616 |
| 13C2117         | 700 °C  | ✓ | 9.95 ± 0.31      | 361.89 ± 11.22     | 0.9756 |
| 13C2119         | 800 °C  | ✓ | 22.07 ± 0.45     | 435.20 ± 8.72      | 0.9855 |
| 13C2120         | 900 °C  | ✓ | 60.93 ± 2.36     | 682.82 ± 26.51     | 0.9987 |
| 13C2122         | 1050 °C | ✓ | 227.53 ± 12.98   | 1766.11 ± 100.73   | 0.9991 |
| 13C2123         | 1250 °C | ✓ | 379.30 ± 61.32   | 2697.85 ± 436.09   | 0.9996 |
| 13C2125         | 1400 °C | ✓ | 580.32 ± 538.05  | 4054.15 ± 3758.83  | 1.0000 |

| Results                                               | 40(a)/36(a) ± 2σ                                                    | 40(r)/39(k) ± 2σ             | Age ± 2σ (Ma)                                          | MSWD                                     |
|-------------------------------------------------------|---------------------------------------------------------------------|------------------------------|--------------------------------------------------------|------------------------------------------|
| Normal Isochron<br>Recalibrated                       | 294.19 ± 3.76<br>± 1.28%                                            | 6.41918 ± 0.06633<br>± 1.03% | 17.56 ± 0.20<br>± 1.16%                                | 0.78<br>58%                              |
| Full External Error ± 0.45<br>Analytical Error ± 0.18 |                                                                     |                              |                                                        |                                          |
| Statistics                                            | 2σ Confidence Limit<br>Error Magnification<br>Number of Data Points | 2.15<br>1.0000<br>8          | Convergence<br>Number of Iterations<br>Calculated Line | 0.000000063131<br>375<br>Weighted York-2 |



| Inverse Isochron |         | 39(k)/40(a+r) ± 2σ |                       | 36(a)/40(a+r) ± 2σ      | r.i.   |
|------------------|---------|--------------------|-----------------------|-------------------------|--------|
| 13C2114          | 500 °C  | ✓                  | 0.0088968 ± 0.0002386 | 0.00320194 ± 0.00019605 | 0.0225 |
| 13C2116          | 600 °C  | ✓                  | 0.0114988 ± 0.0001221 | 0.00315692 ± 0.00005822 | 0.0408 |
| 13C2117          | 700 °C  | ✓                  | 0.0275008 ± 0.0001908 | 0.00276330 ± 0.00008569 | 0.0293 |
| 13C2119          | 800 °C  | ✓                  | 0.0507126 ± 0.0001742 | 0.00229781 ± 0.00004604 | 0.0169 |
| 13C2120          | 900 °C  | ✓                  | 0.0892342 ± 0.0001796 | 0.00146452 ± 0.00005686 | 0.0319 |
| 13C2122          | 1050 °C | ✓                  | 0.1288294 ± 0.0003175 | 0.00056622 ± 0.00003230 | 0.0084 |
| 13C2123          | 1250 °C | ✓                  | 0.1405934 ± 0.0006134 | 0.00037067 ± 0.00005992 | 0.0087 |
| 13C2125          | 1400 °C | ✓                  | 0.1431413 ± 0.0005819 | 0.00024666 ± 0.00022869 | 0.0010 |

| Results                                               | 40(a)/36(a) ± 2σ         | 40(r)/39(k) ± 2σ             | Age ± 2σ (Ma)           | MSWD            |
|-------------------------------------------------------|--------------------------|------------------------------|-------------------------|-----------------|
| Inverse Isochron<br>Recalibrated                      | 294.02 ± 3.77<br>± 1.28% | 6.43068 ± 0.06659<br>± 1.04% | 17.59 ± 0.20<br>± 1.16% | 0.72<br>63%     |
| Full External Error ± 0.45<br>Analytical Error ± 0.18 |                          |                              |                         |                 |
|                                                       |                          |                              |                         |                 |
| Statistics                                            | 2σ Confidence Limit      | 2.15                         | Convergence             | 0.0000004328    |
|                                                       | Error Magnification      | 1.0000                       | Number of Iterations    | 3               |
|                                                       | Number of Data Points    | 8                            | Calculated Line         | Weighted York-2 |
|                                                       | Spreading Factor         | 86.3%                        |                         |                 |



| OSU Argon Geochronology Lab |         |   |           |           |           |           |           |           |           |           |           |           |                   |               |             |             |               |
|-----------------------------|---------|---|-----------|-----------|-----------|-----------|-----------|-----------|-----------|-----------|-----------|-----------|-------------------|---------------|-------------|-------------|---------------|
| Relative Abundances         |         |   | 40Ar      |           | 39Ar      |           | 38Ar      |           | 37Ar      |           | 36Ar      |           | 40(r)/39(k) ± 2σ  | Age ± 2σ (Ma) | 40Ar(r) (%) | 39Ar(k) (%) | K/Ca ± 2σ     |
|                             |         |   | [V]       | 1σ        |                   |               |             |             |               |
| 13C2114                     | 500 °C  | ✓ | 0.3228116 | 0.0009812 | 0.0028748 | 0.0000375 | 0.0002312 | 0.0000374 | 0.0042081 | 0.0003955 | 0.0010347 | 0.0000315 | 6.05002 ± 6.51743 | 16.56 ± 17.76 | 5.38        | 0.51        | 0.293 ± 0.056 |
| 13C2116                     | 600 °C  | ✓ | 0.7432429 | 0.0010508 | 0.0085529 | 0.0000437 | 0.0005910 | 0.0000382 | 0.0098100 | 0.0003966 | 0.0023489 | 0.0000214 | 5.83806 ± 1.49998 | 15.98 ± 4.09  | 6.71        | 1.52        | 0.375 ± 0.031 |
| 13C2117                     | 700 °C  | ✓ | 0.6260325 | 0.0007861 | 0.0172278 | 0.0000557 | 0.0006062 | 0.0000315 | 0.0177311 | 0.0006403 | 0.0017346 | 0.0000267 | 6.67053 ± 0.92326 | 18.25 ± 2.51  | 18.34       | 3.05        | 0.418 ± 0.030 |
| 13C2119                     | 800 °C  | ✓ | 1.3221270 | 0.0007135 | 0.0670956 | 0.0001093 | 0.0015348 | 0.0000506 | 0.0750281 | 0.0017601 | 0.0030577 | 0.0000304 | 6.32971 ± 0.26954 | 17.32 ± 0.73  | 32.10       | 11.89       | 0.384 ± 0.018 |
| 13C2120                     | 900 °C  | ✓ | 1.3162977 | 0.0010395 | 0.1175145 | 0.0000733 | 0.0019325 | 0.0000371 | 0.0985418 | 0.0022869 | 0.0019536 | 0.0000374 | 6.35668 ± 0.18913 | 17.39 ± 0.51  | 56.72       | 20.83       | 0.513 ± 0.024 |
| 13C2122                     | 1050 °C | ✓ | 1.4539864 | 0.0007880 | 0.1873846 | 0.0002072 | 0.0027352 | 0.0000459 | 0.1377986 | 0.0031591 | 0.0008596 | 0.0000235 | 6.46345 ± 0.07590 | 17.68 ± 0.21  | 83.26       | 33.21       | 0.584 ± 0.027 |
| 13C2123                     | 1250 °C | ✓ | 0.9000068 | 0.0011123 | 0.1266241 | 0.0002274 | 0.0020583 | 0.0000450 | 0.1590413 | 0.0036914 | 0.0003757 | 0.0000269 | 6.33364 ± 0.12916 | 17.33 ± 0.35  | 89.03       | 22.44       | 0.342 ± 0.016 |
| 13C2125                     | 1400 °C | ✓ | 0.2582404 | 0.0002476 | 0.0370008 | 0.0000662 | 0.0005987 | 0.0000302 | 0.0613072 | 0.0014151 | 0.0000799 | 0.0000295 | 6.47690 ± 0.47287 | 17.72 ± 1.29  | 92.70       | 6.55        | 0.259 ± 0.012 |

|   |  |  |           |           |           |           |           |           |           |           |           |           |  |  |  |  |
|---|--|--|-----------|-----------|-----------|-----------|-----------|-----------|-----------|-----------|-----------|-----------|--|--|--|--|
| Σ |  |  | 6.9427454 | 0.0024888 | 0.5642751 | 0.0003504 | 0.0102879 | 0.0001133 | 0.5634660 | 0.0058873 | 0.0114448 | 0.0000814 |  |  |  |  |
|---|--|--|-----------|-----------|-----------|-----------|-----------|-----------|-----------|-----------|-----------|-----------|--|--|--|--|

| Information on Analysis and Constants Used in Calculations |                                                                 | Results          |                  |               |      |               |           |  |
|------------------------------------------------------------|-----------------------------------------------------------------|------------------|------------------|---------------|------|---------------|-----------|--|
|                                                            |                                                                 | 40(a)/36(a) ± 2σ | 40(r)/39(k) ± 2σ | Age ± 2σ (Ma) | MSWD | 39Ar(k) (%.n) | K/Ca ± 2σ |  |
| Sample = 1180011-2                                         | Age Equations = Min et al. (2000)                               |                  |                  |               |      |               |           |  |
| Material = Groundmass                                      | Negative Intensities = Allowed                                  |                  |                  |               |      |               |           |  |
| Location = Kerguelen Plateau                               | Decay Constant 40K = 5.543 ± 0.044 E-10 1/a                     |                  |                  |               |      |               |           |  |
| Analyst = Kyle Krawl                                       | Decay Constant 39Ar = 2.940 ± 0.029 E-07 1/h                    |                  |                  |               |      |               |           |  |
| Project = KERGUELEN                                        | Decay Constant 37Ar = 8.230 ± 0.082 E-04 1/h                    |                  |                  |               |      |               |           |  |
| Mass Discrimination Law = LIN                              | Decay Constant 36Cl = 2.236 ± 0.045 E-06 1/a                    |                  |                  |               |      |               |           |  |
| Irradiation = OSU2C13                                      | Decay Constant 40K(EC,β <sup>+</sup> ) = 0.580 ± 0.009 E-10 1/a |                  |                  |               |      |               |           |  |
| J = 0.00152397 ± 0.00000405                                | Decay Constant 40K(β <sup>-</sup> ) = 4.950 ± 0.043 E-10 1/a    |                  |                  |               |      |               |           |  |
| FCT-3 = 28.201 ± 0.023 Ma                                  | Atmospheric Ratio 40/36(a) = 295.50                             |                  |                  |               |      |               |           |  |
| IGSN = Undefined                                           | Atmospheric Ratio 38/36(a) = 0.1869                             |                  |                  |               |      |               |           |  |
| Preferred Age = Undefined                                  | Production Ratio 39/37(ca) = 0.000673                           |                  |                  |               |      |               |           |  |
| Classification = Undefined                                 | Production Ratio 38/37(ca) = 0.000139                           |                  |                  |               |      |               |           |  |
| Experiment Type = Undefined                                | Production Ratio 36/37(ca) = 0.000264                           |                  |                  |               |      |               |           |  |
| Extraction Method = Undefined                              | Production Ratio 40/39(k) = 0.001010                            |                  |                  |               |      |               |           |  |
| Heating = 0 sec                                            | Production Ratio 38/39(k) = 0.011380                            |                  |                  |               |      |               |           |  |
| Isolation = 15.00 min                                      | Production Ratio 36/38(cl) = 316.00 ± 15.80                     |                  |                  |               |      |               |           |  |
| Instrument = MAP215-50                                     | Scaling Ratio K/Ca = 0.430                                      |                  |                  |               |      |               |           |  |
| Lithology = Undefined                                      | Abundance Ratio 40K/K = 1.1700 ± 0.0199 E-04                    |                  |                  |               |      |               |           |  |
| Lat-Lon = Undefined - Undefined                            | Atomic Weight K = 39.0983 ± 0.0001 g                            |                  |                  |               |      |               |           |  |
| R1 ratio = Undefined                                       | Recalibrated to FCT-3 Secondary Standard                        |                  |                  |               |      |               |           |  |
| R2 ratio = Undefined                                       | Standard Age = 28.201 ± 0.023 Ma                                |                  |                  |               |      |               |           |  |
| R3 ratio = Undefined                                       |                                                                 |                  |                  |               |      |               |           |  |
| R4 ratio = Undefined                                       |                                                                 |                  |                  |               |      |               |           |  |
| R5 ratio = Undefined                                       |                                                                 |                  |                  |               |      |               |           |  |
| Collector Calibrations =                                   |                                                                 |                  |                  |               |      |               |           |  |
|                                                            |                                                                 |                  |                  |               |      |               |           |  |
|                                                            |                                                                 |                  |                  |               |      |               |           |  |
|                                                            |                                                                 |                  |                  |               |      |               |           |  |
|                                                            |                                                                 |                  |                  |               |      |               |           |  |
|                                                            |                                                                 |                  |                  |               |      |               |           |  |
|                                                            |                                                                 |                  |                  |               |      |               |           |  |
|                                                            |                                                                 |                  |                  |               |      |               |           |  |
|                                                            |                                                                 |                  |                  |               |      |               |           |  |
|                                                            |                                                                 |                  |                  |               |      |               |           |  |
|                                                            |                                                                 |                  |                  |               |      |               |           |  |
|                                                            |                                                                 |                  |                  |               |      |               |           |  |
|                                                            |                                                                 |                  |                  |               |      |               |           |  |
|                                                            |                                                                 |                  |                  |               |      |               |           |  |
|                                                            |                                                                 |                  |                  |               |      |               |           |  |
|                                                            |                                                                 |                  |                  |               |      |               |           |  |
|                                                            |                                                                 |                  |                  |               |      |               |           |  |
|                                                            |                                                                 |                  |                  |               |      |               |           |  |
|                                                            |                                                                 |                  |                  |               |      |               |           |  |
|                                                            |                                                                 |                  |                  |               |      |               |           |  |
|                                                            |                                                                 |                  |                  |               |      |               |           |  |
|                                                            |                                                                 |                  |                  |               |      |               |           |  |
|                                                            |                                                                 |                  |                  |               |      |               |           |  |
|                                                            |                                                                 |                  |                  |               |      |               |           |  |
|                                                            |                                                                 |                  |                  |               |      |               |           |  |
|                                                            |                                                                 |                  |                  |               |      |               |           |  |
|                                                            |                                                                 |                  |                  |               |      |               |           |  |
|                                                            |                                                                 |                  |                  |               |      |               |           |  |
|                                                            |                                                                 |                  |                  |               |      |               |           |  |
|                                                            |                                                                 |                  |                  |               |      |               |           |  |
|                                                            |                                                                 |                  |                  |               |      |               |           |  |
|                                                            |                                                                 |                  |                  |               |      |               |           |  |
|                                                            |                                                                 |                  |                  |               |      |               |           |  |
|                                                            |                                                                 |                  |                  |               |      |               |           |  |
|                                                            |                                                                 |                  |                  |               |      |               |           |  |
|                                                            |                                                                 |                  |                  |               |      |               |           |  |
|                                                            |                                                                 |                  |                  |               |      |               |           |  |
|                                                            |                                                                 |                  |                  |               |      |               |           |  |
|                                                            |                                                                 |                  |                  |               |      |               |           |  |
|                                                            |                                                                 |                  |                  |               |      |               |           |  |
|                                                            |                                                                 |                  |                  |               |      |               |           |  |
|                                                            |                                                                 |                  |                  |               |      |               |           |  |
|                                                            |                                                                 |                  |                  |               |      |               |           |  |
|                                                            |                                                                 |                  |                  |               |      |               |           |  |
|                                                            |                                                                 |                  |                  |               |      |               |           |  |
|                                                            |                                                                 |                  |                  |               |      |               |           |  |
|                                                            |                                                                 |                  |                  |               |      |               |           |  |
|                                                            |                                                                 |                  |                  |               |      |               |           |  |
|                                                            |                                                                 |                  |                  |               |      |               |           |  |
|                                                            |                                                                 |                  |                  |               |      |               |           |  |
|                                                            |                                                                 |                  |                  |               |      |               |           |  |
|                                                            |                                                                 |                  |                  |               |      |               |           |  |
|                                                            |                                                                 |                  |                  |               |      |               |           |  |
|                                                            |                                                                 |                  |                  |               |      |               |           |  |
|                                                            |                                                                 |                  |                  |               |      |               |           |  |
|                                                            |                                                                 |                  |                  |               |      |               |           |  |
|                                                            |                                                                 |                  |                  |               |      |               |           |  |
|                                                            |                                                                 |                  |                  |               |      |               |           |  |
|                                                            |                                                                 |                  |                  |               |      |               |           |  |
|                                                            |                                                                 |                  |                  |               |      |               |           |  |
|                                                            |                                                                 |                  |                  |               |      |               |           |  |
|                                                            |                                                                 |                  |                  |               |      |               |           |  |
|                                                            |                                                                 |                  |                  |               |      |               |           |  |
|                                                            |                                                                 |                  |                  |               |      |               |           |  |
|                                                            |                                                                 |                  |                  |               |      |               |           |  |
|                                                            |                                                                 |                  |                  |               |      |               |           |  |
|                                                            |                                                                 |                  |                  |               |      |               |           |  |
|                                                            |                                                                 |                  |                  |               |      |               |           |  |
|                                                            |                                                                 |                  |                  |               |      |               |           |  |
|                                                            |                                                                 |                  |                  |               |      |               |           |  |
|                                                            |                                                                 |                  |                  |               |      |               |           |  |
|                                                            |                                                                 |                  |                  |               |      |               |           |  |
|                                                            |                                                                 |                  |                  |               |      |               |           |  |
|                                                            |                                                                 |                  |                  |               |      |               |           |  |
|                                                            |                                                                 |                  |                  |               |      |               |           |  |
|                                                            |                                                                 |                  |                  |               |      |               |           |  |
|                                                            |                                                                 |                  |                  |               |      |               |           |  |
|                                                            |                                                                 |                  |                  |               |      |               |           |  |
|                                                            |                                                                 |                  |                  |               |      |               |           |  |
|                                                            |                                                                 |                  |                  |               |      |               |           |  |
|                                                            |                                                                 |                  |                  |               |      |               |           |  |
|                                                            |                                                                 |                  |                  |               |      |               |           |  |
|                                                            |                                                                 |                  |                  |               |      |               |           |  |
|                                                            |                                                                 |                  |                  |               |      |               |           |  |
|                                                            |                                                                 |                  |                  |               |      |               |           |  |
|                                                            |                                                                 |                  |                  |               |      |               |           |  |
|                                                            |                                                                 |                  |                  |               |      |               |           |  |
|                                                            |                                                                 |                  |                  |               |      |               |           |  |
|                                                            |                                                                 |                  |                  |               |      |               |           |  |
|                                                            |                                                                 |                  |                  |               |      |               |           |  |
|                                                            |                                                                 |                  |                  |               |      |               |           |  |
|                                                            |                                                                 |                  |                  |               |      |               |           |  |
|                                                            |                                                                 |                  |                  |               |      |               |           |  |
|                                                            |                                                                 |                  |                  |               |      |               |           |  |
|                                                            |                                                                 |                  |                  |               |      |               |           |  |
|                                                            |                                                                 |                  |                  |               |      |               |           |  |
|                                                            |                                                                 |                  |                  |               |      |               |           |  |
|                                                            |                                                                 |                  |                  |               |      |               |           |  |
|                                                            |                                                                 |                  |                  |               |      |               |           |  |
|                                                            |                                                                 |                  |                  |               |      |               |           |  |
|                                                            |                                                                 |                  |                  |               |      |               |           |  |
|                                                            |                                                                 |                  |                  |               |      |               |           |  |
|                                                            |                                                                 |                  |                  |               |      |               |           |  |
|                                                            |                                                                 |                  |                  |               |      |               |           |  |
|                                                            |                                                                 |                  |                  |               |      |               |           |  |
|                                                            |                                                                 |                  |                  |               |      |               |           |  |
|                                                            |                                                                 |                  |                  |               |      |               |           |  |
|                                                            |                                                                 |                  |                  |               |      |               |           |  |
|                                                            |                                                                 |                  |                  |               |      |               |           |  |
|                                                            |                                                                 |                  |                  |               |      |               |           |  |
|                                                            |                                                                 |                  |                  |               |      |               |           |  |
|                                                            |                                                                 |                  |                  |               |      |               |           |  |
|                                                            |                                                                 |                  |                  |               |      |               |           |  |
|                                                            |                                                                 |                  |                  |               |      |               |           |  |
|                                                            |                                                                 |                  |                  |               |      |               |           |  |
|                                                            |                                                                 |                  |                  |               |      |               |           |  |
|                                                            |                                                                 |                  |                  |               |      |               |           |  |
|                                                            |                                                                 |                  |                  |               |      |               |           |  |
|                                                            |                                                                 |                  |                  |               |      |               |           |  |
|                                                            |                                                                 |                  |                  |               |      |               |           |  |
|                                                            |                                                                 |                  |                  |               |      |               |           |  |
|                                                            |                                                                 |                  |                  |               |      |               |           |  |
|                                                            |                                                                 |                  |                  |               |      |               |           |  |
|                                                            |                                                                 |                  |                  |               |      |               |           |  |
|                                                            |                                                                 |                  |                  |               |      |               |           |  |
|                                                            |                                                                 |                  |                  |               |      |               |           |  |
|                                                            |                                                                 |                  |                  |               |      |               |           |  |
|                                                            |                                                                 |                  |                  |               |      |               |           |  |
|                                                            |                                                                 |                  |                  |               |      |               |           |  |
|                                                            |                                                                 |                  |                  |               |      |               |           |  |
|                                                            |                                                                 |                  |                  |               |      |               |           |  |
|                                                            |                                                                 |                  |                  |               |      |               |           |  |
|                                                            |                                                                 |                  |                  |               |      |               |           |  |
|                                                            |                                                                 |                  |                  |               |      |               |           |  |
|                                                            |                                                                 |                  |                  |               |      |               |           |  |
|                                                            |                                                                 |                  |                  |               |      |               |           |  |
|                                                            |                                                                 |                  |                  |               |      |               |           |  |
|                                                            |                                                                 |                  |                  |               |      |               |           |  |
|                                                            |                                                                 |                  |                  |               |      |               |           |  |
|                                                            |                                                                 |                  |                  |               |      |               |           |  |
|                                                            |                                                                 |                  |                  |               |      |               |           |  |
|                                                            |                                                                 |                  |                  |               |      |               |           |  |
|                                                            |                                                                 |                  |                  |               |      |               |           |  |
|                                                            |                                                                 |                  |                  |               |      |               |           |  |
|                                                            |                                                                 |                  |                  |               |      |               |           |  |
|                                                            |                                                                 |                  |                  |               |      |               |           |  |
|                                                            |                                                                 |                  |                  |               |      |               |           |  |
|                                                            |                                                                 |                  |                  |               |      |               |           |  |
|                                                            |                                                                 |                  |                  |               |      |               |           |  |
|                                                            |                                                                 |                  |                  |               |      |               |           |  |
|                                                            |                                                                 |                  |                  |               |      |               |           |  |
|                                                            |                                                                 |                  |                  |               |      |               |           |  |
|                                                            |                                                                 |                  |                  |               |      |               |           |  |
|                                                            |                                                                 |                  |                  |               |      |               |           |  |
|                                                            |                                                                 |                  |                  |               |      |               |           |  |
|                                                            |                                                                 |                  |                  |               |      |               |           |  |
|                                                            |                                                                 |                  |                  |               |      |               |           |  |
|                                                            |                                                                 |                  |                  |               |      |               |           |  |



| OSU Argon Geochronology Lab |         |         |                |           |                |           |                 |           |                 |           |                 |           |                |           |                |           |                |           |                 |           |                 |           |                |           |                 |           |                |           |                |           |                |           |                |           |      |
|-----------------------------|---------|---------|----------------|-----------|----------------|-----------|-----------------|-----------|-----------------|-----------|-----------------|-----------|----------------|-----------|----------------|-----------|----------------|-----------|-----------------|-----------|-----------------|-----------|----------------|-----------|-----------------|-----------|----------------|-----------|----------------|-----------|----------------|-----------|----------------|-----------|------|
| Degassing<br>Patterns       |         |         | 36Ar(a)<br>[V] | %1σ       | 36Ar(c)<br>[V] | %1σ       | 36Ar(ca)<br>[V] | %1σ       | 36Ar(cl)<br>[V] | %1σ       | 37Ar(ca)<br>[V] | %1σ       | 38Ar(a)<br>[V] | %1σ       | 38Ar(c)<br>[V] | %1σ       | 38Ar(k)<br>[V] | %1σ       | 38Ar(ca)<br>[V] | %1σ       | 38Ar(cl)<br>[V] | %1σ       | 39Ar(k)<br>[V] | %1σ       | 39Ar(ca)<br>[V] | %1σ       | 40Ar(r)<br>[V] | %1σ       | 40Ar(a)<br>[V] | %1σ       | 40Ar(c)<br>[V] | %1σ       | 40Ar(k)<br>[V] | %1σ       |      |
|                             | 13C2114 | 500 °C  | ✓              | 0.0010336 | 3.05           | 0.0000000 | 0.00            | 0.0000011 | 9.40            | 0.0000000 | 799.10          | 0.0042081 | 9.40           | 0.0001932 | 3.05           | 0.0000000 | 0.00           | 0.0000327 | 1.31            | 0.0000006 | 9.40            | 0.0000047 | 799.12         | 0.0028719 | 1.31            | 0.0000028 | 9.40           | 0.0173754 | 53.85          | 0.3054334 | 3.05           | 0.0000000 | 0.00           | 0.0000029 | 1.31 |
|                             | 13C2116 | 600 °C  | ✓              | 0.0023463 | 0.91           | 0.0000000 | 0.00            | 0.0000026 | 4.04            | 0.0000000 | 71.51           | 0.0098100 | 4.04           | 0.0004385 | 0.91           | 0.0000000 | 0.00           | 0.0000973 | 0.51            | 0.0000014 | 4.04            | 0.0000539 | 71.71          | 0.0085463 | 0.51            | 0.0000066 | 4.04           | 0.0498939 | 12.84          | 0.6933404 | 0.91           | 0.0000000 | 0.00           | 0.0000086 | 0.51 |
|                             | 13C2117 | 700 °C  | ✓              | 0.0017299 | 1.55           | 0.0000000 | 0.00            | 0.0000047 | 3.61            | 0.0000000 | 38.11           | 0.0177311 | 3.61           | 0.0003233 | 1.55           | 0.0000000 | 0.00           | 0.0001959 | 0.32            | 0.0000025 | 3.61            | 0.0000845 | 38.49          | 0.0172159 | 0.32            | 0.0000119 | 3.61           | 0.1148391 | 6.91           | 0.5111760 | 1.55           | 0.0000000 | 0.00           | 0.0000174 | 0.32 |
|                             | 13C2119 | 800 °C  | ✓              | 0.0030378 | 1.00           | 0.0000000 | 0.00            | 0.0000198 | 2.35            | 0.0000000 | 26.87           | 0.0750281 | 2.35           | 0.0005678 | 1.00           | 0.0000000 | 0.00           | 0.0007630 | 0.16            | 0.0000104 | 2.35            | 0.0001936 | 27.40          | 0.0670451 | 0.16            | 0.0000505 | 2.35           | 0.4243760 | 2.12           | 0.8976833 | 1.00           | 0.0000000 | 0.00           | 0.0000677 | 0.16 |
|                             | 13C2120 | 900 °C  | ✓              | 0.0019276 | 1.94           | 0.0000000 | 0.00            | 0.0000260 | 2.32            | 0.0000000 | 17.85           | 0.0985418 | 2.32           | 0.0003603 | 1.94           | 0.0000000 | 0.00           | 0.0013366 | 0.06            | 0.0000137 | 2.32            | 0.0002220 | 18.64          | 0.1174482 | 0.06            | 0.0000663 | 2.32           | 0.7465803 | 1.49           | 0.5695987 | 1.94           | 0.0000000 | 0.00           | 0.0001186 | 0.06 |
|                             | 13C2122 | 1050 °C | ✓              | 0.0008232 | 2.85           | 0.0000000 | 0.00            | 0.0000364 | 2.29            | 0.0000001 | 11.98           | 0.1377986 | 2.29           | 0.0001538 | 2.85           | 0.0000000 | 0.00           | 0.0021314 | 0.11            | 0.0000192 | 2.29            | 0.0004308 | 13.14          | 0.1872919 | 0.11            | 0.0000927 | 2.29           | 1.2105523 | 0.58           | 0.2432449 | 2.85           | 0.0000000 | 0.00           | 0.0001892 | 0.11 |
|                             | 13C2123 | 1250 °C | ✓              | 0.0003336 | 8.08           | 0.0000000 | 0.00            | 0.0000420 | 2.32            | 0.0000001 | 10.05           | 0.1590413 | 2.32           | 0.0000623 | 8.08           | 0.0000000 | 0.00           | 0.0014398 | 0.18            | 0.0000221 | 2.32            | 0.0005341 | 11.40          | 0.1265170 | 0.18            | 0.0001070 | 2.32           | 0.8013138 | 1.00           | 0.0985652 | 8.08           | 0.0000000 | 0.00           | 0.0001278 | 0.18 |
|                             | 13C2125 | 1400 °C | ✓              | 0.0000637 | 46.36          | 0.0000000 | 0.00            | 0.0000162 | 2.31            | 0.0000000 | 20.23           | 0.0613072 | 2.31           | 0.0000119 | 46.36          | 0.0000000 | 0.00           | 0.0004206 | 0.18            | 0.0000085 | 2.31            | 0.0001577 | 20.94          | 0.0369595 | 0.18            | 0.0000413 | 2.31           | 0.2393831 | 3.65           | 0.0188200 | 46.36          | 0.0000000 | 0.00           | 0.0000373 | 0.18 |
|                             |         | Σ       |                | 0.0112956 | 0.72           | 0.0000000 | 0.00            | 0.0001488 | 1.04            | 0.0000004 | 7.23            | 0.5634660 | 1.04           | 0.0021112 | 0.72           | 0.0000000 | 0.00           | 0.0064171 | 0.06            | 0.0000783 | 1.04            | 0.0016813 | 7.64           | 0.5638959 | 0.06            | 0.0003792 | 1.04           | 3.6043140 | 0.67           | 3.3378619 | 0.72           | 0.0000000 | 0.00           | 0.0005695 | 0.06 |
|                             |         | Σ       |                |           |                |           |                 |           |                 |           | 0.0114448       | 0.71      | 0.5634660      | 1.04      |                |           |                |           |                 |           |                 | 0.0102879 | 1.26           |           |                 | 0.5642751 | 0.06           |           |                |           |                |           |                | 6.9427454 | 0.49 |



| Additional<br>Parameters |         |   | 40Ar/39Ar  | 1σ       | 37Ar/39Ar | 1σ       | 36Ar/39Ar | 1σ       | Time<br>(days) | 37Ar<br>(decay) | 39Ar<br>(decay) | 40Ar<br>(moles) |
|--------------------------|---------|---|------------|----------|-----------|----------|-----------|----------|----------------|-----------------|-----------------|-----------------|
| 13C2114                  | 500 °C  | ✓ | 112.290867 | 1.504533 | 1.463785  | 0.138905 | 0.359933  | 0.011917 | 114.649        | 9.650477        | 1.00081017      | 6.456E-14       |
| 13C2116                  | 600 °C  | ✓ | 86.899275  | 0.461032 | 1.146971  | 0.046745 | 0.274635  | 0.002867 | 114.684        | 9.657230        | 1.00081042      | 1.486E-13       |
| 13C2117                  | 700 °C  | ✓ | 36.338433  | 0.125963 | 1.029210  | 0.037317 | 0.100684  | 0.001585 | 114.701        | 9.660543        | 1.00081054      | 1.252E-13       |
| 13C2119                  | 800 °C  | ✓ | 19.705117  | 0.033819 | 1.118226  | 0.026296 | 0.045572  | 0.000459 | 114.736        | 9.667170        | 1.00081079      | 2.644E-13       |
| 13C2120                  | 900 °C  | ✓ | 11.201153  | 0.011270 | 0.838551  | 0.019467 | 0.016625  | 0.000318 | 114.754        | 9.670619        | 1.00081092      | 2.633E-13       |
| 13C2122                  | 1050 °C | ✓ | 7.759369   | 0.009557 | 0.735378  | 0.016878 | 0.004588  | 0.000125 | 114.789        | 9.677253        | 1.00081116      | 2.908E-13       |
| 13C2123                  | 1250 °C | ✓ | 7.107707   | 0.015494 | 1.256012  | 0.029239 | 0.002967  | 0.000213 | 114.808        | 9.680838        | 1.00081129      | 1.800E-13       |
| 13C2125                  | 1400 °C | ✓ | 6.979324   | 0.014172 | 1.656916  | 0.038361 | 0.002160  | 0.000798 | 114.846        | 9.688144        | 1.00081156      | 5.165E-14       |



| Procedure<br>Blanks |         | 36Ar<br>[V] | 1σ        | 37Ar<br>[V] | 1σ        | 38Ar<br>[V] | 1σ        | 39Ar<br>[V] | 1σ        | 40Ar<br>[V] | 1σ        |
|---------------------|---------|-------------|-----------|-------------|-----------|-------------|-----------|-------------|-----------|-------------|-----------|
| 13C2114             | 500 °C  | 0.0002926   | 0.0000225 | 0.0000283   | 0.0000173 | 0.0000112   | 0.0000246 | 0.0000679   | 0.0000250 | 0.0013396   | 0.0000422 |
| 13C2116             | 600 °C  | 0.0002704   | 0.0000117 | 0.0000081   | 0.0000060 | 0.0000060   | 0.0000163 | 0.0000065   | 0.0000162 | 0.0026828   | 0.0000430 |
| 13C2117             | 700 °C  | 0.0002704   | 0.0000117 | 0.0000081   | 0.0000060 | 0.0000060   | 0.0000163 | 0.0000065   | 0.0000162 | 0.0026828   | 0.0000430 |
| 13C2119             | 800 °C  | 0.0002707   | 0.0000162 | 0.0000086   | 0.0000166 | 0.0000024   | 0.0000200 | 0.0000623   | 0.0000204 | 0.0013348   | 0.0000472 |
| 13C2120             | 900 °C  | 0.0002707   | 0.0000162 | 0.0000086   | 0.0000166 | 0.0000024   | 0.0000200 | 0.0000623   | 0.0000204 | 0.0013348   | 0.0000472 |
| 13C2122             | 1050 °C | 0.0002548   | 0.0000076 | 0.0000073   | 0.0000168 | 0.0000061   | 0.0000252 | 0.0000196   | 0.0000196 | 0.0013248   | 0.0000351 |
| 13C2123             | 1250 °C | 0.0002548   | 0.0000076 | 0.0000073   | 0.0000168 | 0.0000061   | 0.0000252 | 0.0000196   | 0.0000196 | 0.0013248   | 0.0000351 |
| 13C2125             | 1400 °C | 0.0003252   | 0.0000203 | 0.0000046   | 0.0000187 | 0.0000273   | 0.0000203 | 0.0000129   | 0.0000298 | 0.0020319   | 0.0000472 |



| OSU Argon Geochronology Lab |         |             |           |           |        |              |           |           |        |             |           |           |        |             |           |           |        |             |           |           |        |         |
|-----------------------------|---------|-------------|-----------|-----------|--------|--------------|-----------|-----------|--------|-------------|-----------|-----------|--------|-------------|-----------|-----------|--------|-------------|-----------|-----------|--------|---------|
| Intercept<br>Values         |         | 36Ar<br>[V] | 1σ        | r2        |        | 37Ar<br>[V]  | 1σ        | r2        |        | 38Ar<br>[V] | 1σ        | r2        |        | 39Ar<br>[V] | 1σ        | r2        |        | 40Ar<br>[V] | 1σ        | r2        |        |         |
|                             | 13C2114 | 500 °C      | 0.0013580 | 0.0000232 | 0.6671 | LIN #        | 0.0004741 | 0.0000368 | 0.2191 | EXP #       | 0.0002459 | 0.0000290 | 0.0336 | LIN #       | 0.0029645 | 0.0000283 | 0.9874 | EXP #       | 0.3246057 | 0.0009816 | 0.9790 | EXP #   |
|                             | 13C2116 | 600 °C      | 0.0026887 | 0.0000184 | 0.9389 | LIN #        | 0.0010467 | 0.0000342 | 0.0428 | EXP #       | 0.0005942 | 0.0000352 | 0.0680 | LIN #       | 0.0086248 | 0.0000409 | 0.9890 | EXP #       | 0.7470463 | 0.0010515 | 0.9956 | EXP #   |
|                             | 13C2117 | 700 °C      | 0.0020565 | 0.0000248 | 0.7599 | LIN #        | 0.0018848 | 0.0000524 | 0.3949 | EXP #       | 0.0006096 | 0.0000275 | 0.0235 | LIN #       | 0.0173679 | 0.0000535 | 0.0127 | EXP #       | 0.6297228 | 0.0007862 | 0.9962 | EXP #   |
|                             | 13C2119 | 800 °C      | 0.0034200 | 0.0000265 | 0.8739 | LIN # 2 4 10 | 0.0079469 | 0.0000438 | 0.9719 | EXP # 1     | 0.0015616 | 0.0000474 | 0.3124 | LIN #       | 0.0676986 | 0.0001064 | 0.9908 | EXP #       | 1.3259812 | 0.0007133 | 0.9994 | EXP # 3 |
|                             | 13C2120 | 900 °C      | 0.0022830 | 0.0000348 | 0.5820 | LIN #        | 0.0104310 | 0.0000470 | 0.9760 | EXP #       | 0.0019656 | 0.0000319 | 0.5628 | LIN #       | 0.1185236 | 0.0000615 | 0.9995 | EXP #       | 1.3201408 | 0.0010404 | 0.9982 | EXP #   |
|                             | 13C2122 | 1050 °C     | 0.0011406 | 0.0000229 | 0.4496 | LIN #        | 0.0145732 | 0.0000418 | 0.9900 | EXP #       | 0.0027850 | 0.0000391 | 0.7218 | LIN #       | 0.1888826 | 0.0002002 | 0.9984 | EXP #       | 1.4582276 | 0.0007888 | 0.9992 | EXP # 1 |
|                             | 13C2123 | 1250 °C     | 0.0006422 | 0.0000267 | 0.6547 | LIN # 9      | 0.0168124 | 0.0000780 | 0.9792 | EXP #       | 0.0020973 | 0.0000380 | 0.6258 | LIN #       | 0.1276264 | 0.0002252 | 0.9959 | EXP #       | 0.9031379 | 0.0011140 | 0.9947 | EXP #   |
|                             | 13C2125 | 1400 °C     | 0.0004081 | 0.0000226 | 0.0943 | LIN #        | 0.0064771 | 0.0000182 | 0.9930 | EXP #       | 0.0006356 | 0.0000230 | 0.6307 | LIN # 3     | 0.0373118 | 0.0000587 | 0.9964 | EXP #       | 0.2607678 | 0.0002435 | 0.9959 | EXP # 1 |



| OSU Argon Geochronology Lab |  |         |          |           |            |                   |               |                  |       |                    |                    |                     |   |     |               |       |     |     |              |                        |        |       |      |      |      |        |             |       |         |         |         |            |           |         |    |
|-----------------------------|--|---------|----------|-----------|------------|-------------------|---------------|------------------|-------|--------------------|--------------------|---------------------|---|-----|---------------|-------|-----|-----|--------------|------------------------|--------|-------|------|------|------|--------|-------------|-------|---------|---------|---------|------------|-----------|---------|----|
| Sample Parameters           |  | Sample  | Material | Location  | Analyst    | Temp              | Standard Name | Standard (in Ma) | %1σ   | Standard Reference | Standard 40Ar/39Ar | %1σ                 | J | %1σ | Air 40Ar/36Ar | %1σ   | MDF | %1σ | Volume Ratio | Sensitivity (mol/volt) | Day    | Month | Year | Hour | Min  | Resist | Irradiation | X-pos | Y-pos   | Z/H-pos | Project | Experiment | Nmb       |         |    |
|                             |  | 13C2114 | 500 °C   | 1180011-2 | Groundmass | Kerguelen Plateau | Kyle Krawl    | 500              | FCT-3 | 28.201             | 0.083              | Kuiper et al., 2008 |   |     | 0.00152397    | 0.266 |     |     | 1.00697      | 0.030                  | 0.9986 | 2E-13 | 29   | JUL  | 2013 | 7      | 35          | 1     | OSU2C13 | 0.00    | 0.00    | 50.70      | Kerguelen | 13C2114 | 01 |
|                             |  | 13C2116 | 600 °C   | 1180011-2 | Groundmass | Kerguelen Plateau | Kyle Krawl    | 600              | FCT-3 | 28.201             | 0.083              | Kuiper et al., 2008 |   |     | 0.00152397    | 0.266 |     |     | 1.00697      | 0.030                  | 0.9985 | 2E-13 | 29   | JUL  | 2013 | 8      | 26          | 1     | OSU2C13 | 0.00    | 0.00    | 50.70      | Kerguelen | 13C2114 | 01 |
|                             |  | 13C2117 | 700 °C   | 1180011-2 | Groundmass | Kerguelen Plateau | Kyle Krawl    | 700              | FCT-3 | 28.201             | 0.083              | Kuiper et al., 2008 |   |     | 0.00152397    | 0.266 |     |     | 1.00697      | 0.030                  | 0.9984 | 2E-13 | 29   | JUL  | 2013 | 8      | 51          | 1     | OSU2C13 | 0.00    | 0.00    | 50.70      | Kerguelen | 13C2114 | 01 |
|                             |  | 13C2119 | 800 °C   | 1180011-2 | Groundmass | Kerguelen Plateau | Trevor Smith  | 800              | FCT-3 | 28.201             | 0.083              | Kuiper et al., 2008 |   |     | 0.00152397    | 0.266 |     |     | 1.00697      | 0.030                  | 0.9981 | 2E-13 | 29   | JUL  | 2013 | 9      | 41          | 1     | OSU2C13 | 0.00    | 0.00    | 50.70      | Kerguelen | 13C2114 | 01 |
|                             |  | 13C2120 | 900 °C   | 1180011-2 | Groundmass | Kerguelen Plateau | Kyle Krawl    | 900              | FCT-3 | 28.201             | 0.083              | Kuiper et al., 2008 |   |     | 0.00152397    | 0.266 |     |     | 1.00697      | 0.030                  | 0.9981 | 2E-13 | 29   | JUL  | 2013 | 10     | 7           | 1     | OSU2C13 | 0.00    | 0.00    | 50.70      | Kerguelen | 13C2114 | 01 |
|                             |  | 13C2122 | 1050 °C  | 1180011-2 | Groundmass | Kerguelen Plateau | Trevor Smith  | 1050             | FCT-3 | 28.201             | 0.083              | Kuiper et al., 2008 |   |     | 0.00152397    | 0.266 |     |     | 1.00697      | 0.030                  | 0.998  | 2E-13 | 29   | JUL  | 2013 | 10     | 57          | 1     | OSU2C13 | 0.00    | 0.00    | 50.70      | Kerguelen | 13C2114 | 01 |
|                             |  | 13C2123 | 1250 °C  | 1180011-2 | Groundmass | Kerguelen Plateau | Trevor Smith  | 1250             | FCT-3 | 28.201             | 0.083              | Kuiper et al., 2008 |   |     | 0.00152397    | 0.266 |     |     | 1.00697      | 0.030                  | 0.998  | 2E-13 | 29   | JUL  | 2013 | 11     | 24          | 1     | OSU2C13 | 0.00    | 0.00    | 50.70      | Kerguelen | 13C2114 | 01 |
|                             |  | 13C2125 | 1400 °C  | 1180011-2 | Groundmass | Kerguelen Plateau | Trevor Smith  | 1400             | FCT-3 | 28.201             | 0.083              | Kuiper et al., 2008 |   |     | 0.00152397    | 0.266 |     |     | 1.00697      | 0.030                  | 0.9981 | 2E-13 | 29   | JUL  | 2013 | 12     | 19          | 1     | OSU2C13 | 0.00    | 0.00    | 50.70      | Kerguelen | 13C2114 | 01 |



| OSU Argon Geochronology Lab |         |          |       |          |       |          |        |          |       |           |          |           |          |           |          |          |         |          |         |           |     |      |      |      |     |       |     |
|-----------------------------|---------|----------|-------|----------|-------|----------|--------|----------|-------|-----------|----------|-----------|----------|-----------|----------|----------|---------|----------|---------|-----------|-----|------|------|------|-----|-------|-----|
| Irradiation<br>Constants    |         | 40/36(a) | %1σ   | 40/36(c) | %1σ   | 38/36(a) | %1σ    | 38/36(c) | %1σ   | 39/37(ca) | %1σ      | 38/37(ca) | %1σ      | 36/37(ca) | %1σ      | 40/39(k) | %1σ     | 38/39(k) | %1σ     | 36/38(cl) | %1σ | K/Ca | %1σ  | K/Cl | %1σ | Ca/Cl | %1σ |
|                             | 13C2114 | 500 °C   | 295.5 | 0        | 0.018 | 35       | 0.1869 | 0        | 1.493 | 3         | 0.000673 | 0         | 0.000139 | 0         | 0.000264 | 0        | 0.00101 | 0        | 0.01138 | 0         | 0   | 0    | 0.43 | 0    | 0   | 0     | 0   |
|                             | 13C2116 | 600 °C   | 295.5 | 0        | 0.018 | 35       | 0.1869 | 0        | 1.493 | 3         | 0.000673 | 0         | 0.000139 | 0         | 0.000264 | 0        | 0.00101 | 0        | 0.01138 | 0         | 0   | 0    | 0.43 | 0    | 0   | 0     | 0   |
|                             | 13C2117 | 700 °C   | 295.5 | 0        | 0.018 | 35       | 0.1869 | 0        | 1.493 | 3         | 0.000673 | 0         | 0.000139 | 0         | 0.000264 | 0        | 0.00101 | 0        | 0.01138 | 0         | 0   | 0    | 0.43 | 0    | 0   | 0     | 0   |
|                             | 13C2119 | 800 °C   | 295.5 | 0        | 0.018 | 35       | 0.1869 | 0        | 1.493 | 3         | 0.000673 | 0         | 0.000139 | 0         | 0.000264 | 0        | 0.00101 | 0        | 0.01138 | 0         | 0   | 0    | 0.43 | 0    | 0   | 0     | 0   |
|                             | 13C2120 | 900 °C   | 295.5 | 0        | 0.018 | 35       | 0.1869 | 0        | 1.493 | 3         | 0.000673 | 0         | 0.000139 | 0         | 0.000264 | 0        | 0.00101 | 0        | 0.01138 | 0         | 0   | 0    | 0.43 | 0    | 0   | 0     | 0   |
|                             | 13C2122 | 1050 °C  | 295.5 | 0        | 0.018 | 35       | 0.1869 | 0        | 1.493 | 3         | 0.000673 | 0         | 0.000139 | 0         | 0.000264 | 0        | 0.00101 | 0        | 0.01138 | 0         | 0   | 0    | 0.43 | 0    | 0   | 0     | 0   |
|                             | 13C2123 | 1250 °C  | 295.5 | 0        | 0.018 | 35       | 0.1869 | 0        | 1.493 | 3         | 0.000673 | 0         | 0.000139 | 0         | 0.000264 | 0        | 0.00101 | 0        | 0.01138 | 0         | 0   | 0    | 0.43 | 0    | 0   | 0     | 0   |
|                             | 13C2125 | 1400 °C  | 295.5 | 0        | 0.018 | 35       | 0.1869 | 0        | 1.493 | 3         | 0.000673 | 0         | 0.000139 | 0         | 0.000264 | 0        | 0.00101 | 0        | 0.01138 | 0         | 0   | 0    | 0.43 | 0    | 0   | 0     | 0   |
|                             |         |          |       |          |       |          |        |          |       |           |          |           |          |           |          |          |         |          |         |           |     |      |      |      |     |       |     |



13C2114.AGE >>> 1180011-2 >>> KERGUELEN PROJECT

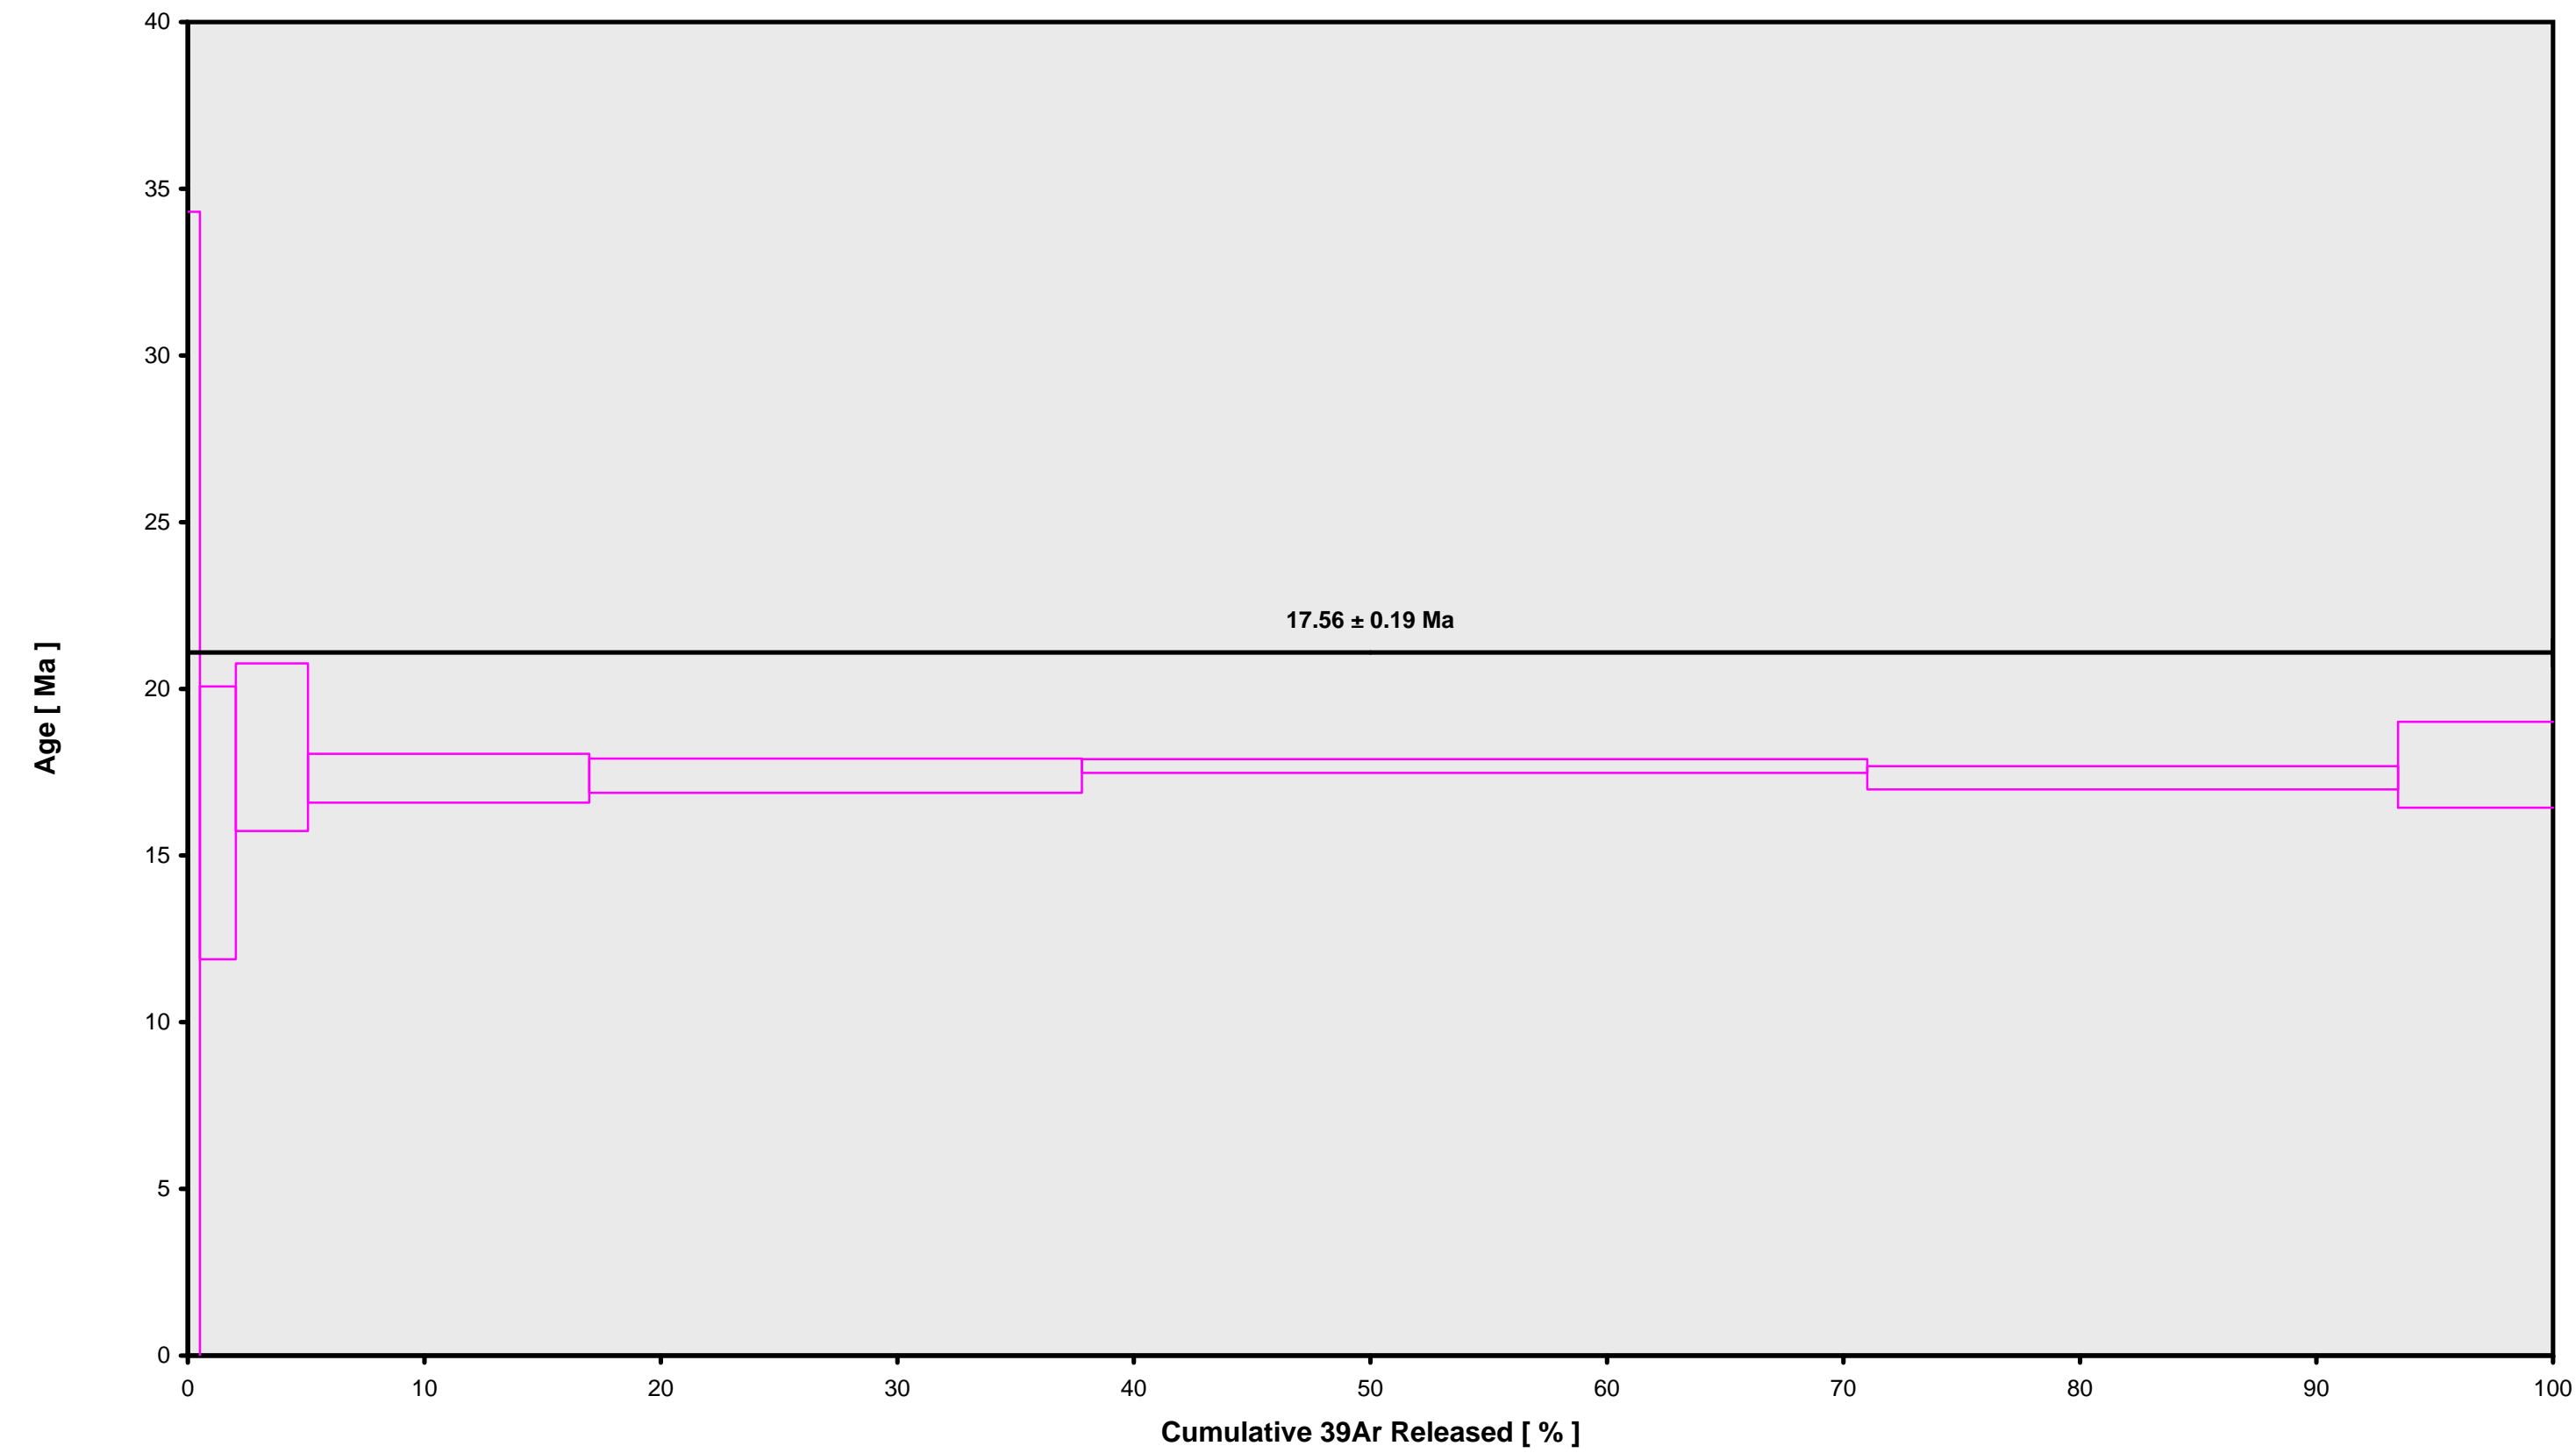

**Ar-Ages in Ma**

**WEIGHTED PLATEAU**  
17.56 ± 0.19

**TOTAL FUSION**  
17.49 ± 0.25

**NORMAL ISOCHRON**  
17.56 ± 0.20

**INVERSE ISOCHRON**  
17.59 ± 0.20

**MSWD (PROBABILITY)**  
0.71 (66%)

**Sample Info**

Groundmass  
Kerguelen Plateau  
Kyle Krawl

IRR = OSU2C13  
J = 0.00152397 ± 0.00000405

**RECALIBRATED AGE**



13C2114.AGE >>> 1180011-2 >>> KERGUELEN PROJECT

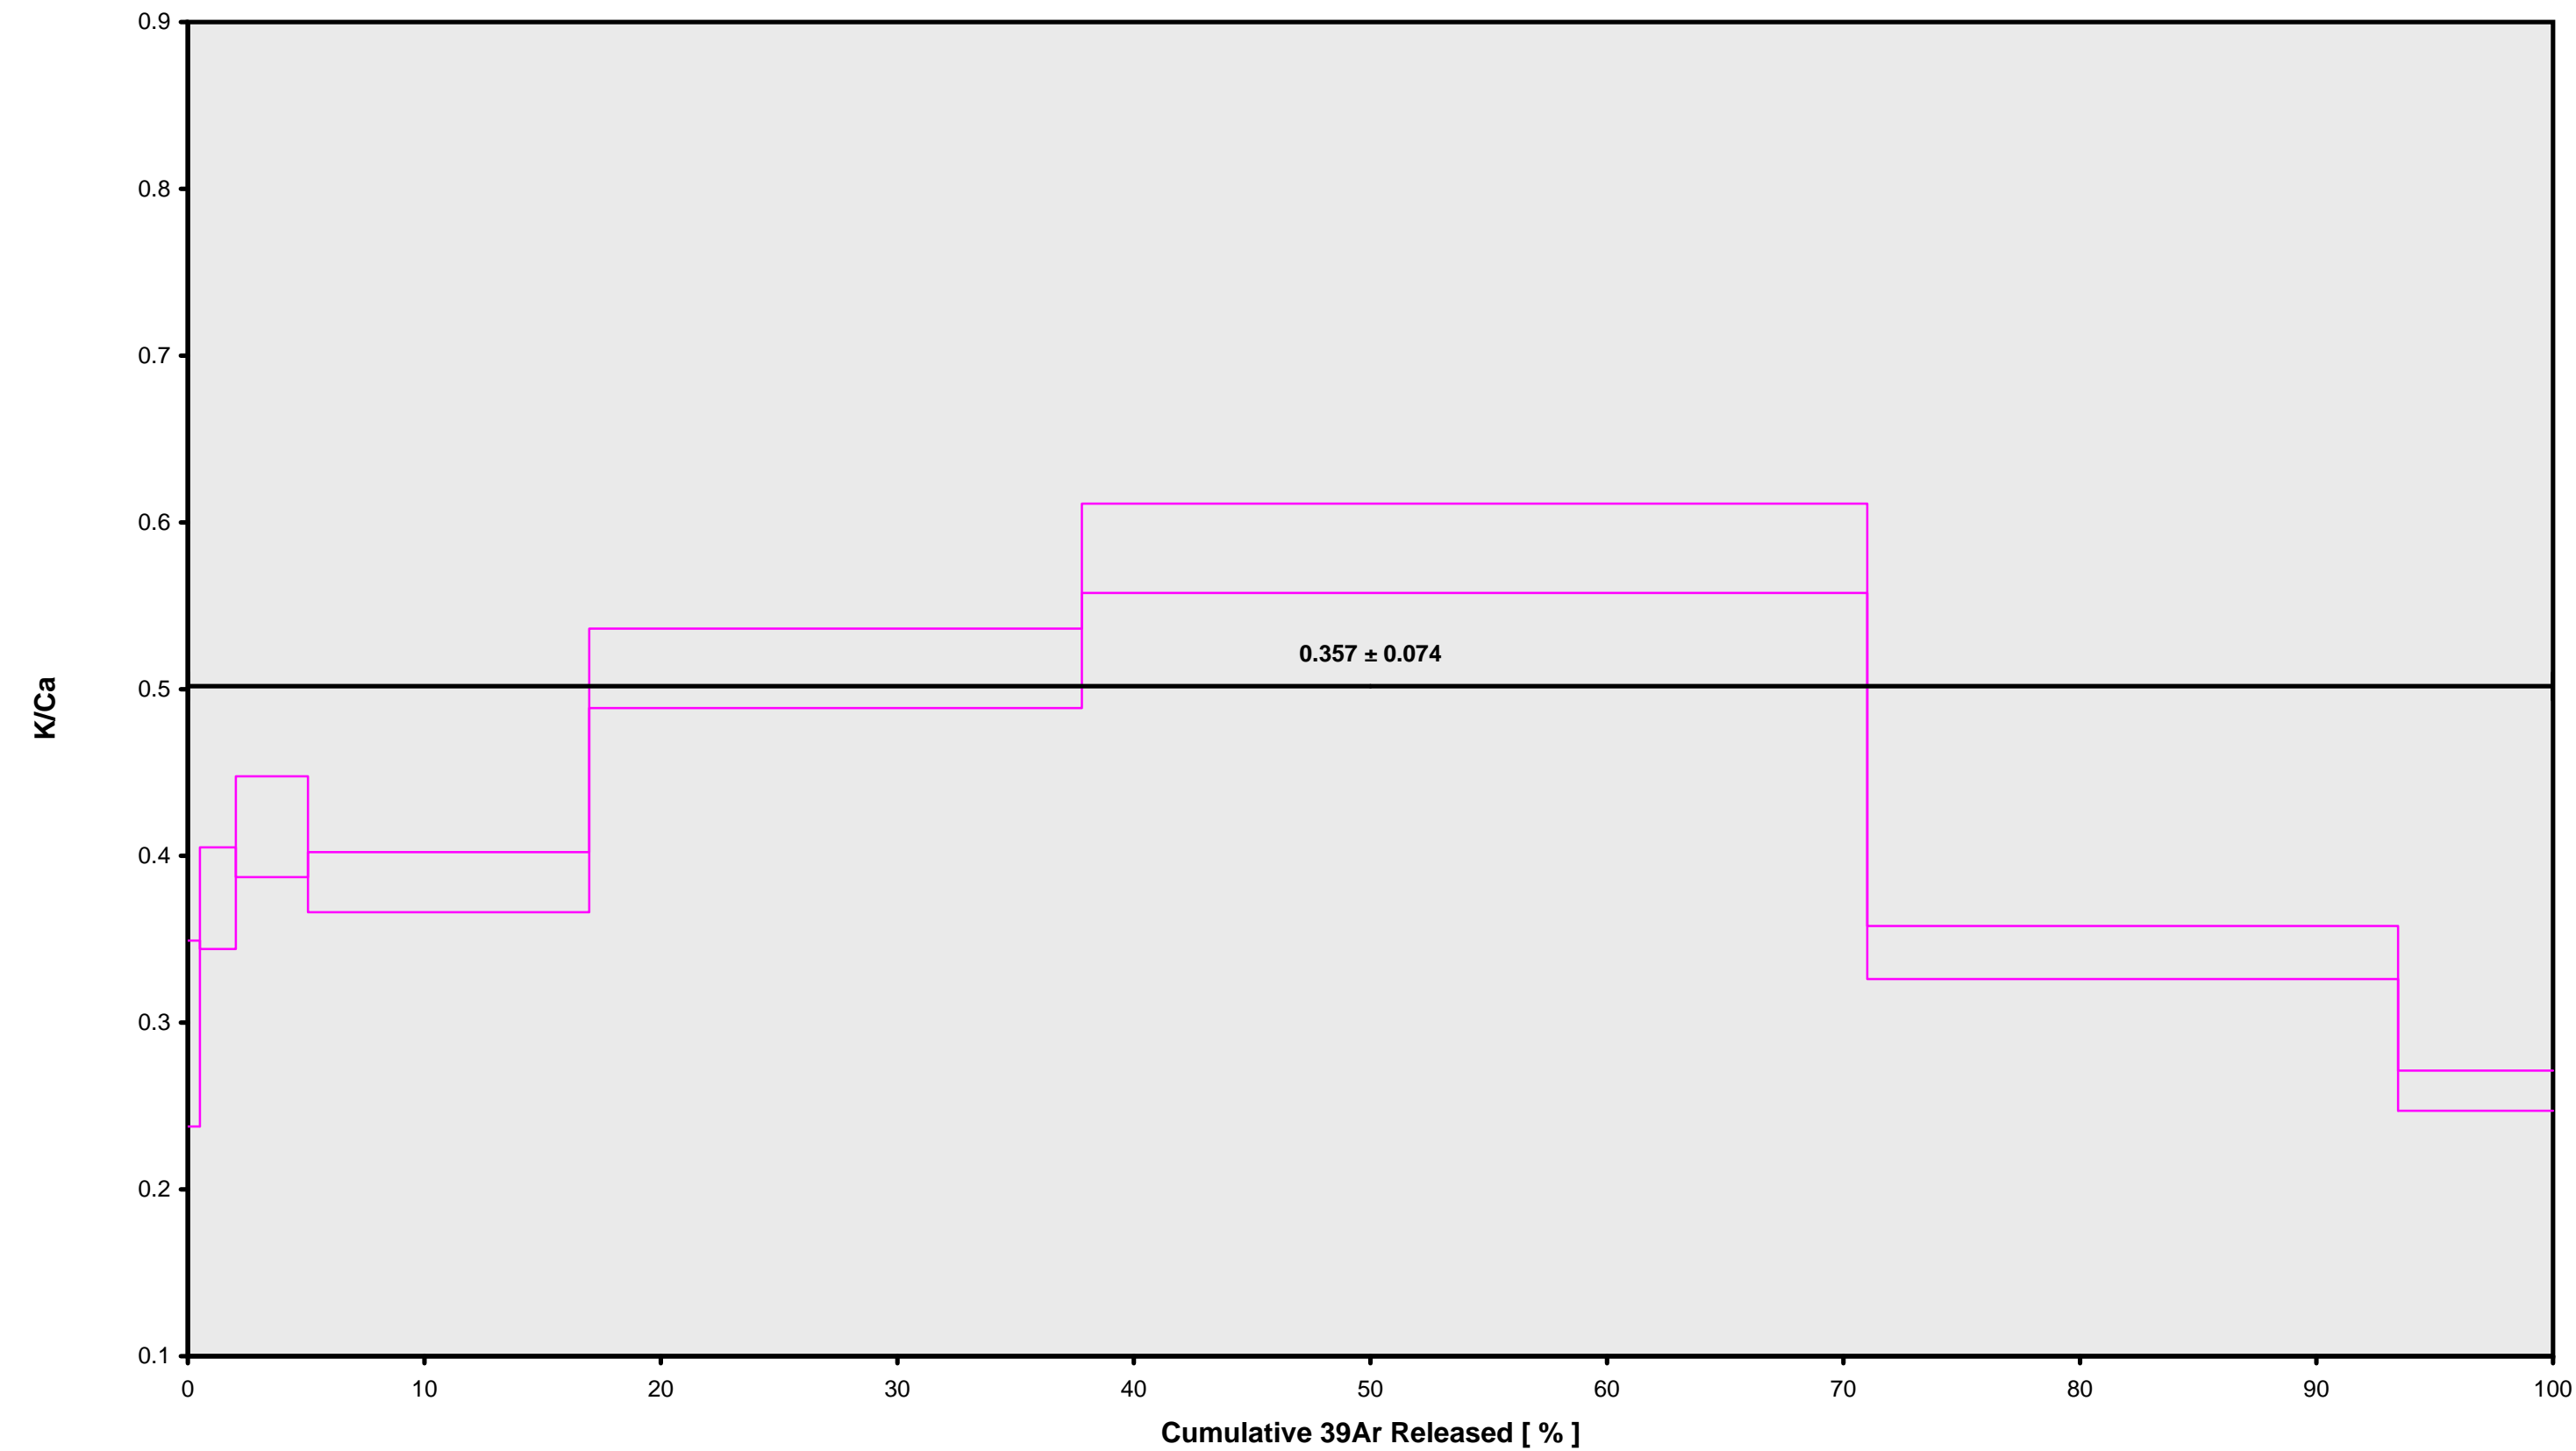

Ar-Ages in Ma

WEIGHTED PLATEAU

17.56  $\pm$  0.19

TOTAL FUSION

17.49  $\pm$  0.25

NORMAL ISOCHRON

17.56  $\pm$  0.20

INVERSE ISOCHRON

17.59  $\pm$  0.20

Sample Info

Groundmass

Kerguelen Plateau

Kyle Krawl

IRR = OSU2C13

J = 0.00152397  $\pm$  0.00000405

RECALIBRATED AGE



13C2114.AGE >>> 1180011-2 >>> KERGUELEN PROJECT

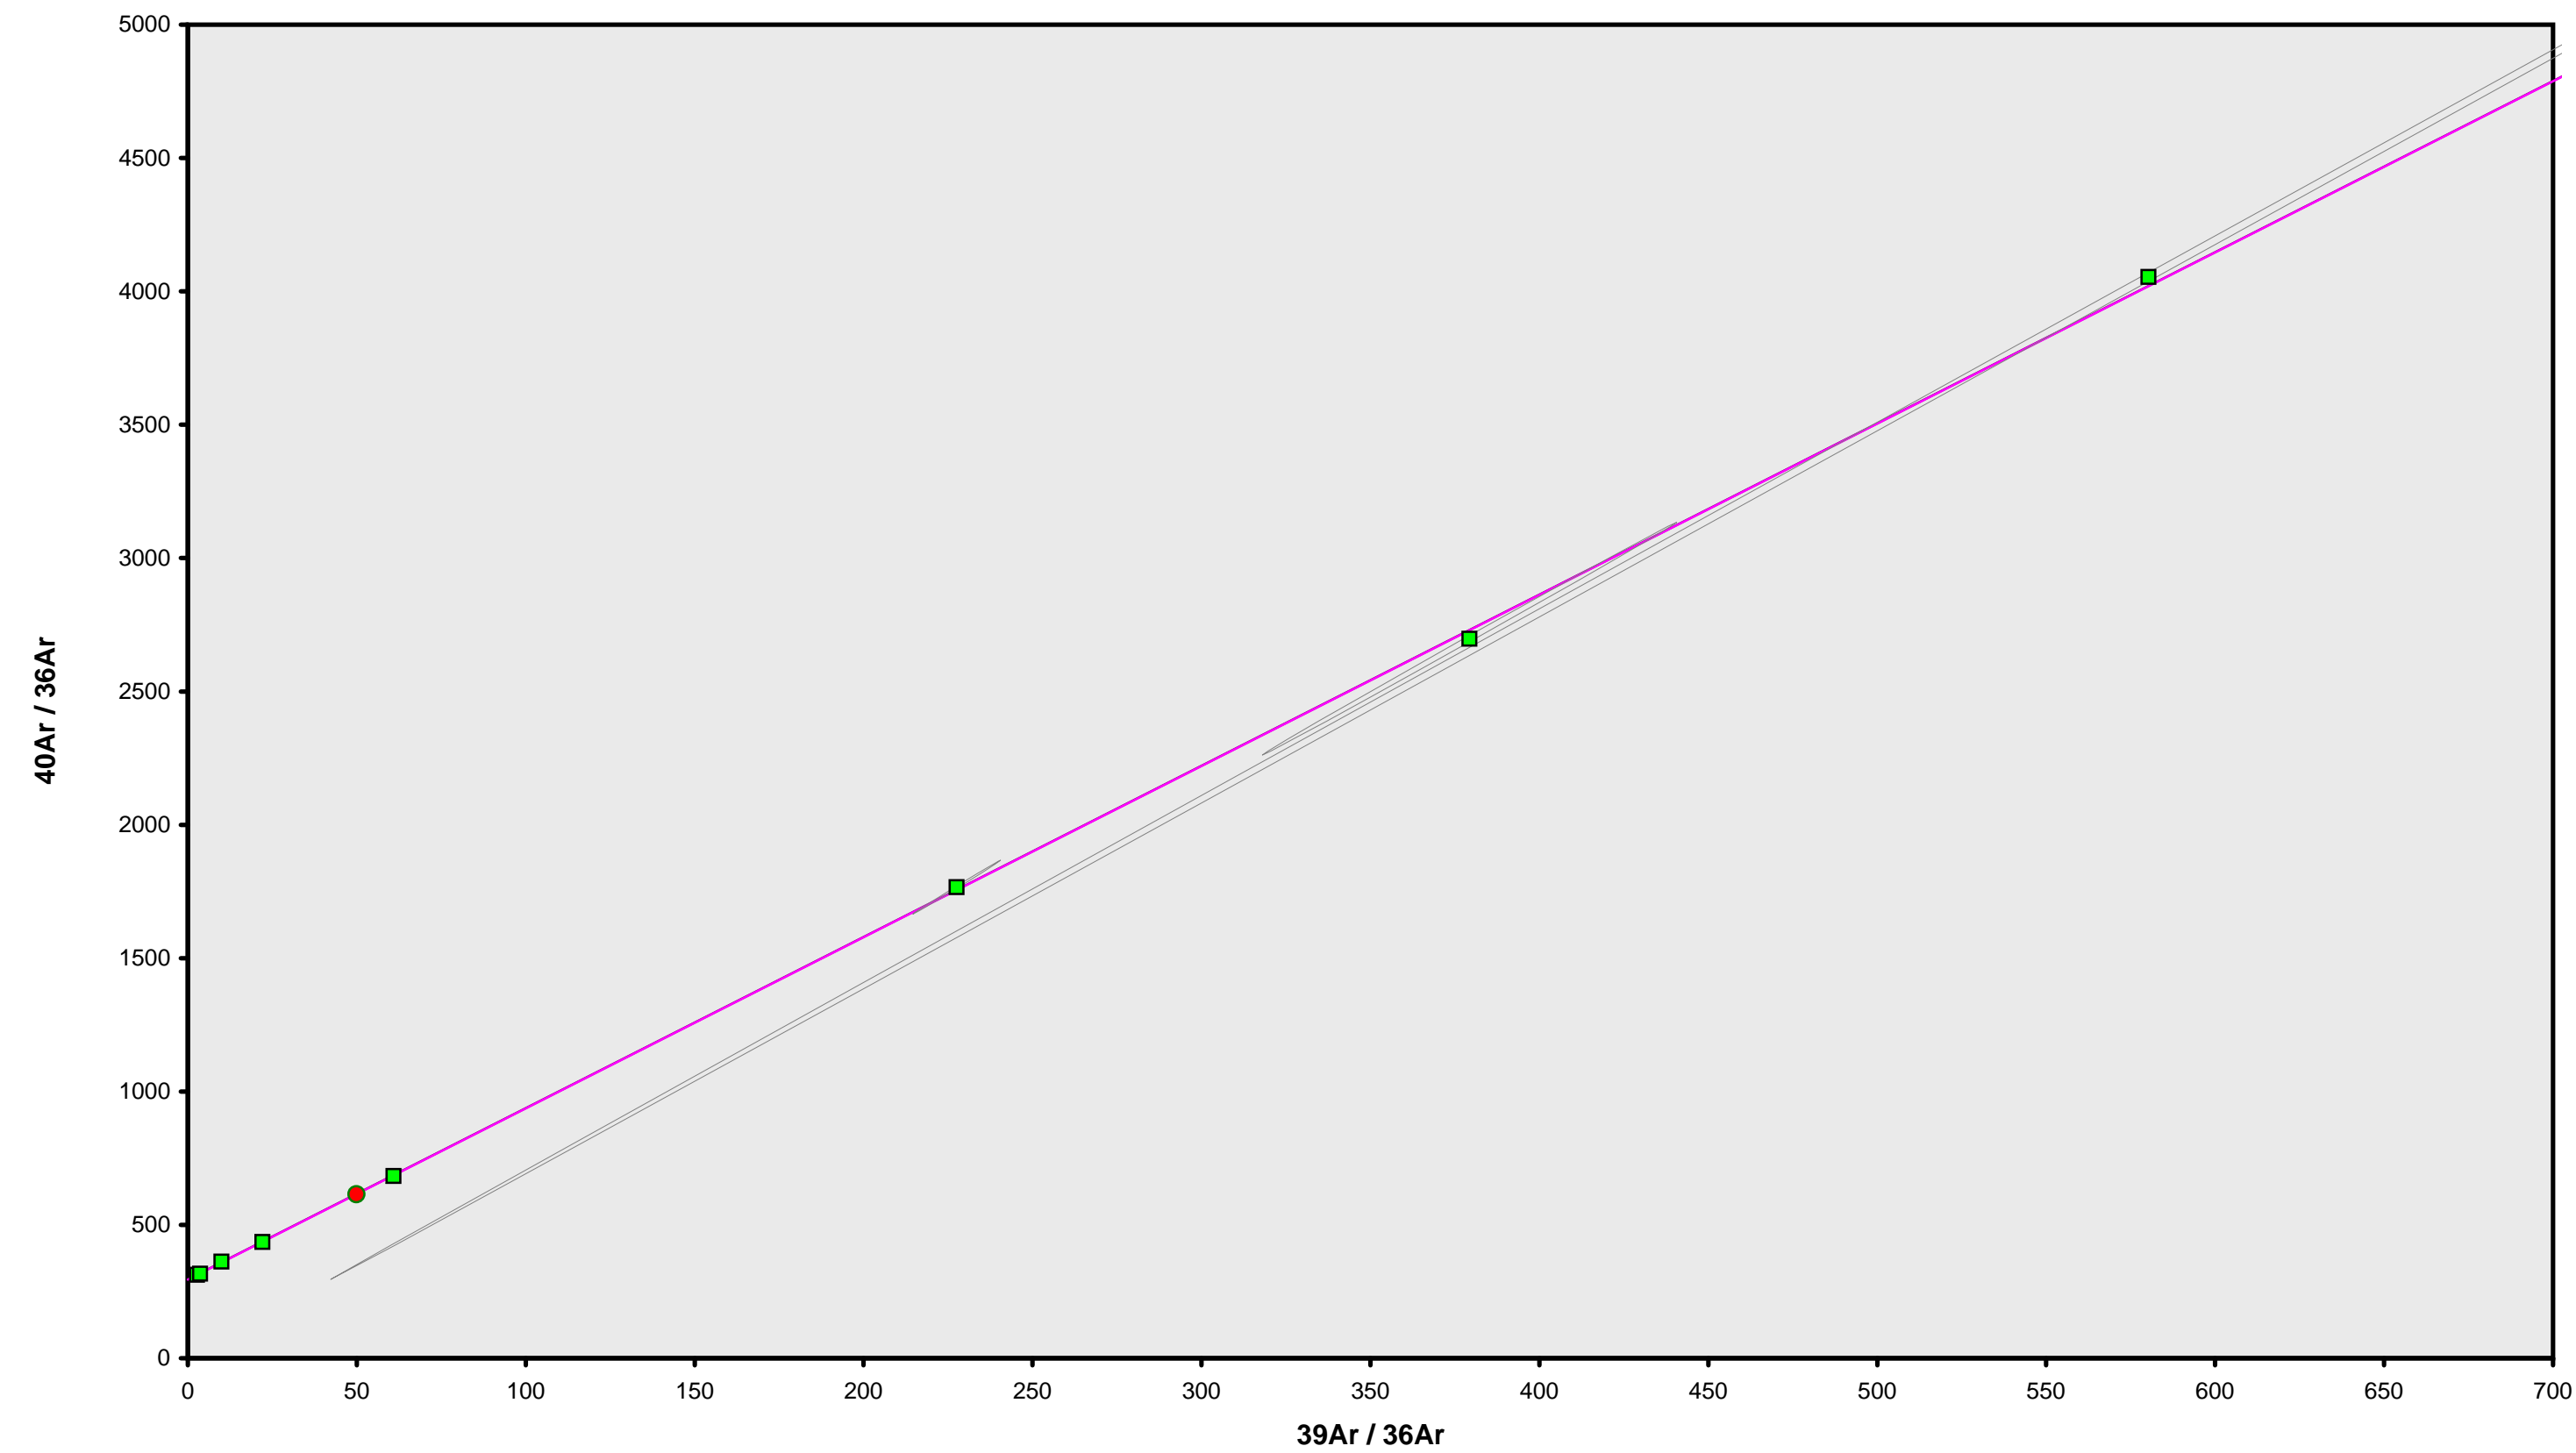

**Ar-Ages in Ma**

**WEIGHTED PLATEAU**  
17.56 ± 0.19

**TOTAL FUSION**  
17.49 ± 0.25

**NORMAL ISOCHRON**  
17.56 ± 0.20

**INVERSE ISOCHRON**  
17.59 ± 0.20

**MSWD (PROBABILITY)**  
0.78 (58%)

**40AR/36AR INTERCEPT**  
294.2 ± 3.8

**Sample Info**

Groundmass  
Kerguelen Plateau  
Kyle Krawl

IRR = OSU2C13  
J = 0.00152397 ± 0.00000405

**RECALIBRATED AGE**



13C2114.AGE >>> 1180011-2 >>> KERGUELEN PROJECT

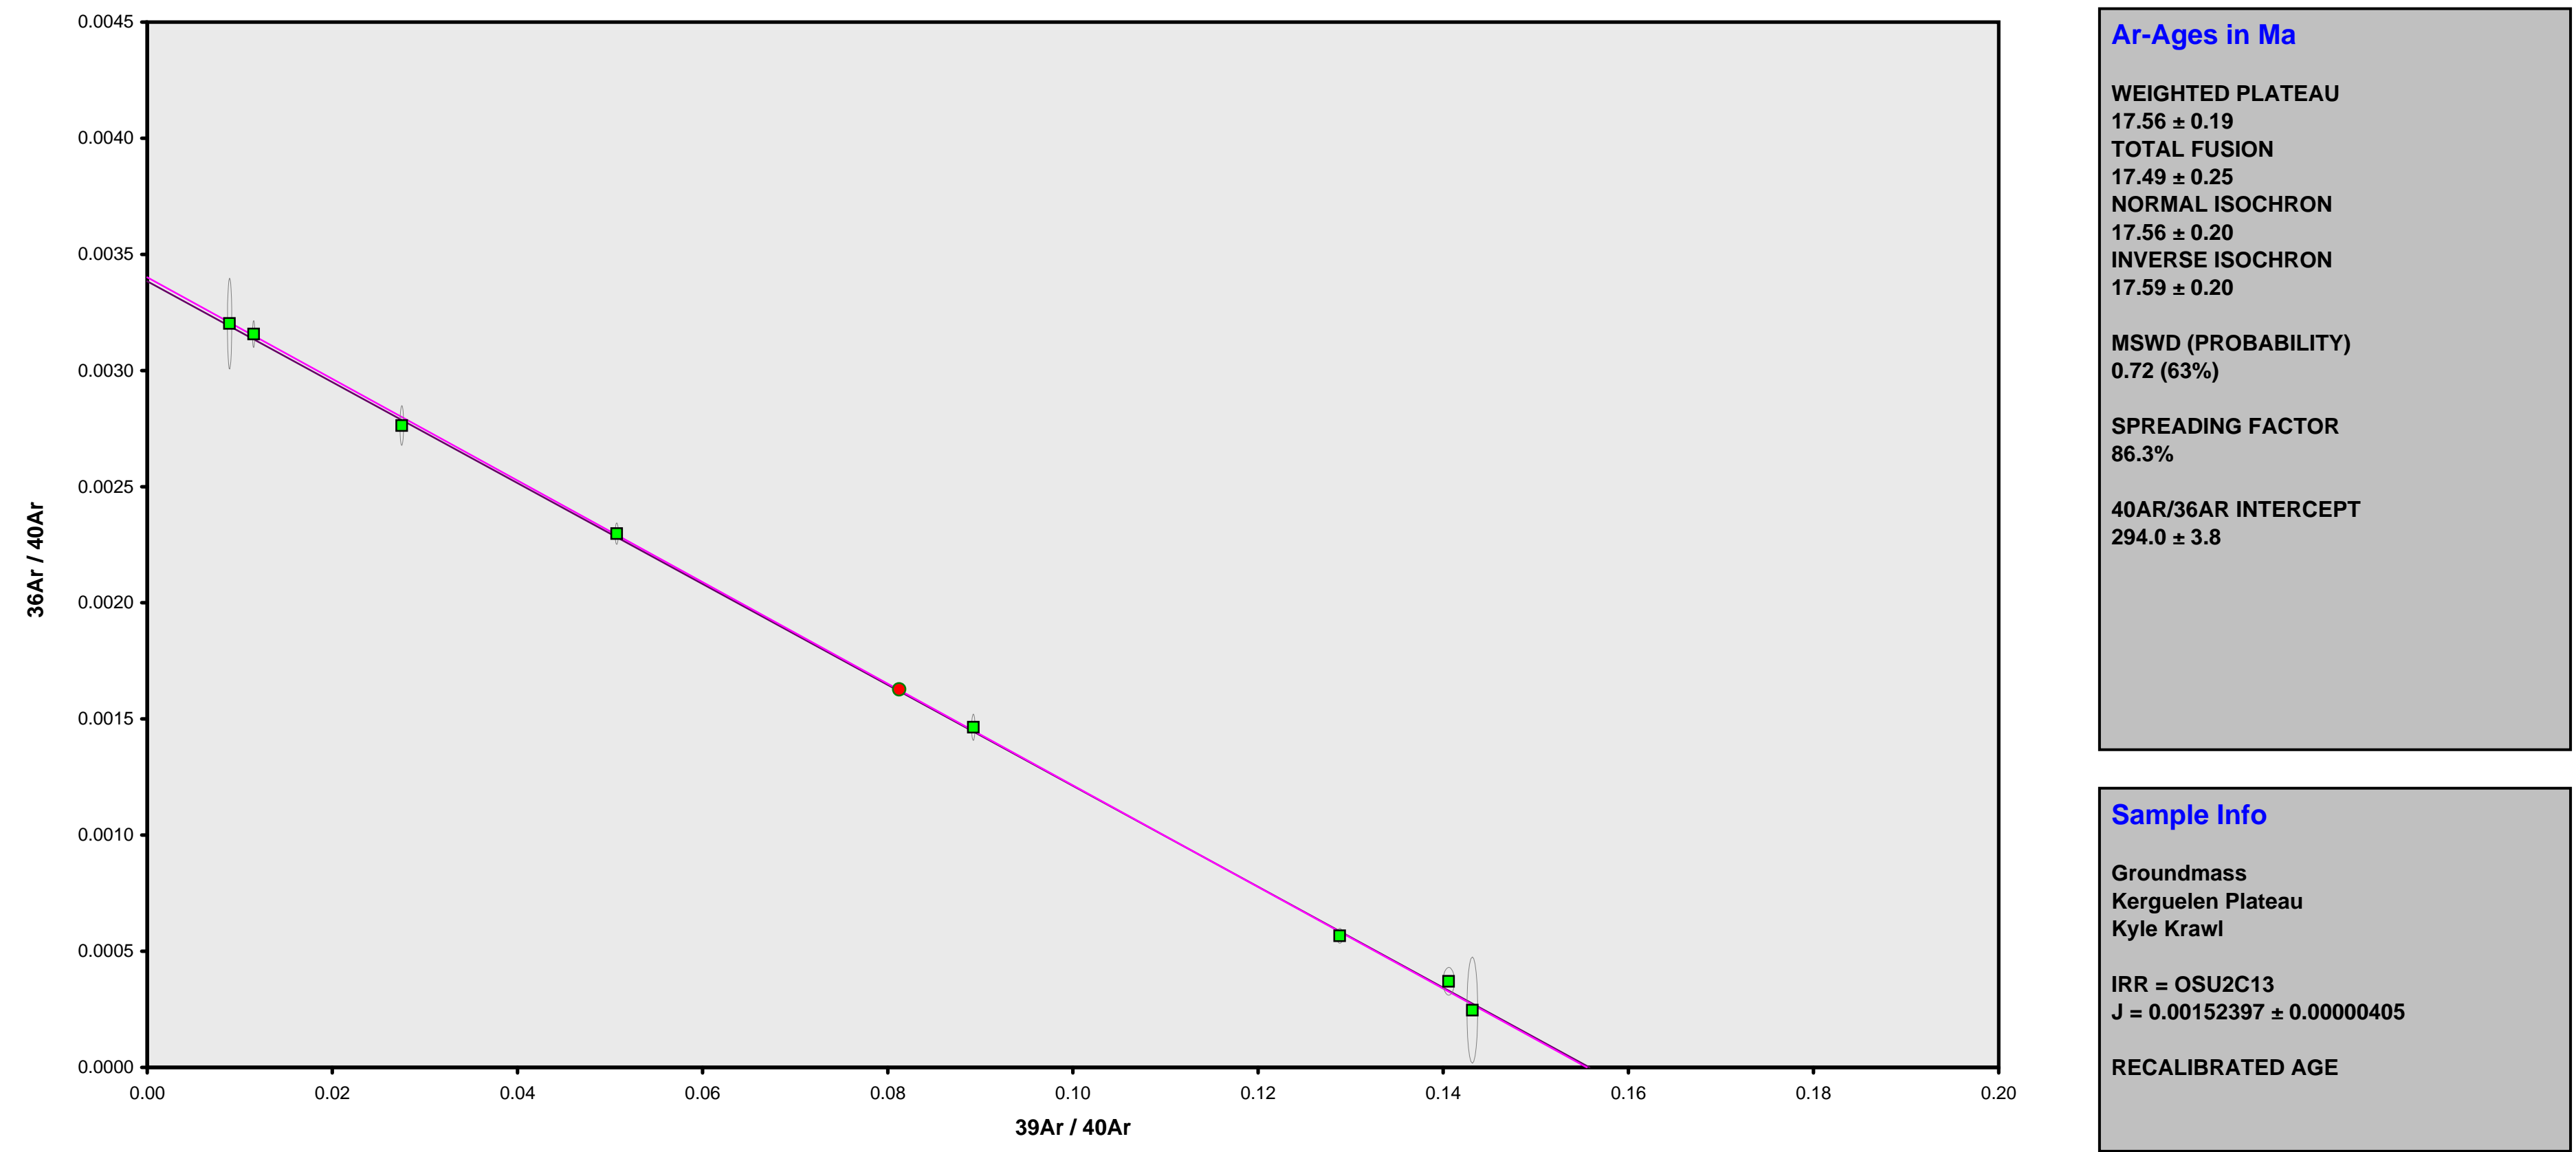



| Incremental Heating |         | 36Ar(a)<br>[V] | 37Ar(ca)<br>[V] | 38Ar(cl)<br>[V] | 39Ar(k)<br>[V] | 40Ar(r)<br>[V] | Age ± 2σ<br>(Ma) | 40Ar(r)<br>(%) | 39Ar(k)<br>(%) | K/Ca ± 2σ     |
|---------------------|---------|----------------|-----------------|-----------------|----------------|----------------|------------------|----------------|----------------|---------------|
| 13C2101             | 500 °C  | 0.0212096      | 0.0107536       | 0.0003206       | 0.0123449      | 0.1177925      | 26.34 ± 3.79     | 1.84           | 2.04           | 0.494 ± 0.034 |
| 13C2103             | 600 °C  | ✓ 0.0112417    | 0.0213770       | 0.0001047       | 0.0157960      | 0.1148895      | 20.11 ± 2.61     | 3.34           | 2.61           | 0.318 ± 0.016 |
| 13C2104             | 700 °C  | ✓ 0.0198715    | 0.1045178       | 0.0003375       | 0.0732114      | 0.5145136      | 19.43 ± 0.69     | 8.06           | 12.11          | 0.301 ± 0.014 |
| 13C2106             | 800 °C  | ✓ 0.0149015    | 0.1762408       | 0.0002698       | 0.1453124      | 1.0387373      | 19.77 ± 0.38     | 19.09          | 24.03          | 0.355 ± 0.016 |
| 13C2107             | 900 °C  | ✓ 0.0090171    | 0.1453631       | 0.0001419       | 0.1425143      | 1.0024637      | 19.45 ± 0.33     | 27.34          | 23.56          | 0.422 ± 0.019 |
| 13C2109             | 1050 °C | ✓ 0.0058366    | 0.1594327       | 0.0000706       | 0.1246480      | 0.8792309      | 19.51 ± 0.29     | 33.76          | 20.61          | 0.336 ± 0.015 |
| 13C2110             | 1250 °C | ✓ 0.0038529    | 0.3094013       | 0.0000514       | 0.0726455      | 0.5099089      | 19.41 ± 0.82     | 30.93          | 12.01          | 0.101 ± 0.005 |
| 13C2112             | 1400 °C | 0.0013419      | 0.1523419       | 0.0000367       | 0.0183023      | 0.1511843      | 22.82 ± 1.74     | 27.60          | 3.03           | 0.052 ± 0.002 |

|   |  |           |           |           |           |           |  |  |  |  |
|---|--|-----------|-----------|-----------|-----------|-----------|--|--|--|--|
| Σ |  | 0.0872728 | 1.0794282 | 0.0013331 | 0.6047748 | 4.3287207 |  |  |  |  |
|---|--|-----------|-----------|-----------|-----------|-----------|--|--|--|--|

| Information on Analysis                                                                                                                                                                                                                      | Results          | 40(r)/39(k) ± 2σ          | Age ± 2σ<br>(Ma)           | MSWD                    | 39Ar(k)<br>(%,n)    | K/Ca ± 2σ     |
|----------------------------------------------------------------------------------------------------------------------------------------------------------------------------------------------------------------------------------------------|------------------|---------------------------|----------------------------|-------------------------|---------------------|---------------|
| Sample = 205-2<br>Material = Groundmass<br>Location = Kerguelen Plateau<br>Analyst = Kyle Krawl<br>Project = KERGUELEN<br>Mass Discrimination Law = LIN<br>Irradiation = OSU2C13<br>J = 0.00154115 ± 0.00000405<br>FCT-3 = 28.201 ± 0.023 Ma | Age Plateau      |                           |                            |                         |                     |               |
|                                                                                                                                                                                                                                              | Recalibrated     | 7.06621 ± 0.06478 ± 0.92% | 19.54 ± 0.21 ± 1.05%       | 0.42 83%                | 94.93 6             | 0.171 ± 0.099 |
|                                                                                                                                                                                                                                              |                  |                           | Full External Error ± 0.49 | 2.26                    | 2σ Confidence Limit |               |
|                                                                                                                                                                                                                                              |                  |                           | Analytical Error ± 0.18    | 1.0000                  | Error Magnification |               |
|                                                                                                                                                                                                                                              | Total Fusion Age |                           |                            |                         |                     |               |
|                                                                                                                                                                                                                                              | Recalibrated     | 7.15757 ± 0.07988 ± 1.12% | 19.79 ± 0.24 ± 1.23%       |                         | 8                   | 0.241 ± 0.005 |
|                                                                                                                                                                                                                                              |                  |                           | Full External Error ± 0.51 |                         |                     |               |
|                                                                                                                                                                                                                                              |                  |                           |                            | Analytical Error ± 0.22 |                     |               |



| Normal Isochron |         | 39(k)/36(a) ± 2σ |              | 40(a+r)/36(a) ± 2σ | r.i.   |
|-----------------|---------|------------------|--------------|--------------------|--------|
| 13C2101         | 500 °C  |                  | 0.58 ± 0.01  | 301.05 ± 0.82      | 0.2151 |
| 13C2103         | 600 °C  | ✓                | 1.41 ± 0.01  | 305.72 ± 1.37      | 0.4232 |
| 13C2104         | 700 °C  | ✓                | 3.68 ± 0.01  | 321.39 ± 1.00      | 0.7524 |
| 13C2106         | 800 °C  | ✓                | 9.75 ± 0.05  | 365.21 ± 1.65      | 0.7926 |
| 13C2107         | 900 °C  | ✓                | 15.80 ± 0.10 | 406.67 ± 2.57      | 0.9490 |
| 13C2109         | 1050 °C | ✓                | 21.36 ± 0.15 | 446.14 ± 3.15      | 0.8957 |
| 13C2110         | 1250 °C | ✓                | 18.85 ± 0.36 | 427.84 ± 8.05      | 0.9839 |
| 13C2112         | 1400 °C |                  | 13.64 ± 0.41 | 408.16 ± 11.86     | 0.9677 |

| Results                                               | 40(a)/36(a) ± 2σ                                                    | 40(r)/39(k) ± 2σ             | Age ± 2σ (Ma)                                          | MSWD                                    |
|-------------------------------------------------------|---------------------------------------------------------------------|------------------------------|--------------------------------------------------------|-----------------------------------------|
| Normal Isochron<br>Recalibrated                       | 295.68 ± 0.92<br>± 0.31%                                            | 7.05116 ± 0.09951<br>± 1.41% | 19.50 ± 0.29<br>± 1.50%                                | 0.49<br>74%                             |
| Full External Error ± 0.53<br>Analytical Error ± 0.27 |                                                                     |                              |                                                        |                                         |
| Statistics                                            | 2σ Confidence Limit<br>Error Magnification<br>Number of Data Points | 2.41<br>1.0000<br>6          | Convergence<br>Number of Iterations<br>Calculated Line | 0.000000062051<br>11<br>Weighted York-2 |



| Inverse Isochron |         | 39(k)/40(a+r) ± 2σ |                       | 36(a)/40(a+r) ± 2σ      | r.i.   |
|------------------|---------|--------------------|-----------------------|-------------------------|--------|
| 13C2101          | 500 °C  |                    | 0.0019334 ± 0.0000214 | 0.00332167 ± 0.00000902 | 0.0252 |
| 13C2103          | 600 °C  | ✓                  | 0.0045961 ± 0.0000402 | 0.00327097 ± 0.00001466 | 0.0462 |
| 13C2104          | 700 °C  | ✓                  | 0.0114634 ± 0.0000307 | 0.00311147 ± 0.00000970 | 0.0243 |
| 13C2106          | 800 °C  | ✓                  | 0.0267013 ± 0.0000915 | 0.00273817 ± 0.00001235 | 0.0165 |
| 13C2107          | 900 °C  | ✓                  | 0.0388638 ± 0.0000792 | 0.00245898 ± 0.00001556 | 0.1195 |
| 13C2109          | 1050 °C | ✓                  | 0.0478692 ± 0.0001545 | 0.00224144 ± 0.00001585 | 0.2289 |
| 13C2110          | 1250 °C | ✓                  | 0.0440692 ± 0.0001493 | 0.00233730 ± 0.00004398 | 0.0538 |
| 13C2112          | 1400 °C |                    | 0.0334155 ± 0.0002514 | 0.00245000 ± 0.00007118 | 0.0242 |

| Results                          | 40(a)/36(a) ± 2σ      |        | 40(r)/39(k) ± 2σ           | Age ± 2σ (Ma)   | MSWD |
|----------------------------------|-----------------------|--------|----------------------------|-----------------|------|
| Inverse Isochron<br>Recalibrated | 295.68 ± 0.92         |        | 7.05129 ± 0.09956          | 19.50 ± 0.29    | 0.49 |
|                                  | ± 0.31%               |        | ± 1.41%                    | ± 1.50%         | 74%  |
|                                  |                       |        | Full External Error ± 0.53 |                 |      |
|                                  |                       |        | Analytical Error ± 0.27    |                 |      |
| Statistics                       | 2σ Confidence Limit   | 2.41   | Convergence                | 0.0000000274    |      |
|                                  | Error Magnification   | 1.0000 | Number of Iterations       | 5               |      |
|                                  | Number of Data Points | 6      | Calculated Line            | Weighted York-2 |      |
|                                  | Spreading Factor      | 30.5%  |                            |                 |      |



| OSU Argon Geochronology Lab |           |           |           |           |           |           |           |           |           |           |           |                   |               |             |             |               |
|-----------------------------|-----------|-----------|-----------|-----------|-----------|-----------|-----------|-----------|-----------|-----------|-----------|-------------------|---------------|-------------|-------------|---------------|
| Relative Abundances         |           | 40Ar [V]  | 1σ        | 39Ar [V]  | 1σ        | 38Ar [V]  | 1σ        | 37Ar [V]  | 1σ        | 36Ar [V]  | 1σ        | 40(r)/39(k) ± 2σ  | Age ± 2σ (Ma) | 40Ar(r) (%) | 39Ar(k) (%) | K/Ca ± 2σ     |
| 13C2101                     | 500 °C    | 6.385229  | 0.0027764 | 0.0123521 | 0.0000681 | 0.0044266 | 0.0000310 | 0.0107536 | 0.0003633 | 0.0212125 | 0.0000273 | 9.54182 ± 1.38464 | 26.34 ± 3.79  | 1.84        | 2.04        | 0.494 ± 0.034 |
| 13C2103                     | 600 °C ✓  | 3.436834  | 0.0023110 | 0.0158104 | 0.0000682 | 0.0023885 | 0.0000250 | 0.0213770 | 0.0005376 | 0.0112474 | 0.0000240 | 7.27332 ± 0.94775 | 20.11 ± 2.61  | 3.34        | 2.61        | 0.318 ± 0.016 |
| 13C2104                     | 700 °C ✓  | 6.386630  | 0.0014367 | 0.0732818 | 0.0000965 | 0.0048992 | 0.0000419 | 0.1045178 | 0.0023585 | 0.0198992 | 0.0000307 | 7.02778 ± 0.25129 | 19.43 ± 0.69  | 8.06        | 12.11       | 0.301 ± 0.014 |
| 13C2106                     | 800 °C ✓  | 5.442285  | 0.0013727 | 0.1454310 | 0.0002463 | 0.0047330 | 0.0000384 | 0.1762408 | 0.0039136 | 0.0149481 | 0.0000334 | 7.14831 ± 0.13928 | 19.77 ± 0.38  | 19.09       | 24.03       | 0.355 ± 0.016 |
| 13C2107                     | 900 °C ✓  | 3.667165  | 0.0022760 | 0.1426122 | 0.0001151 | 0.0034692 | 0.0000281 | 0.1453631 | 0.0032384 | 0.0090555 | 0.0000280 | 7.03413 ± 0.12089 | 19.45 ± 0.33  | 27.34       | 23.56       | 0.422 ± 0.019 |
| 13C2109                     | 1050 °C ✓ | 2.604058  | 0.0029759 | 0.1247553 | 0.0001421 | 0.0026021 | 0.0000403 | 0.1594327 | 0.0035513 | 0.0058787 | 0.0000195 | 7.05371 ± 0.10539 | 19.51 ± 0.29  | 33.76       | 20.61       | 0.336 ± 0.015 |
| 13C2110                     | 1250 °C ✓ | 1.648515  | 0.0015267 | 0.0728537 | 0.0001029 | 0.0016412 | 0.0000281 | 0.3094013 | 0.0069043 | 0.0039346 | 0.0000360 | 7.01914 ± 0.29712 | 19.41 ± 0.82  | 30.93       | 12.01       | 0.101 ± 0.005 |
| 13C2112                     | 1400 °C   | 0.547739  | 0.0006301 | 0.0184048 | 0.0000655 | 0.0005170 | 0.0000220 | 0.1523419 | 0.0034112 | 0.0013821 | 0.0000194 | 8.26039 ± 0.63404 | 22.82 ± 1.74  | 27.60       | 3.03        | 0.052 ± 0.002 |
| Σ                           |           | 30.118455 | 0.0058105 | 0.6055013 | 0.0003572 | 0.0246768 | 0.0000922 | 1.0794282 | 0.0101835 | 0.0875581 | 0.0000788 |                   |               |             |             |               |

| Information on Analysis and Constants Used in Calculations |                                                                 |
|------------------------------------------------------------|-----------------------------------------------------------------|
| Sample = 205-2                                             | Age Equations = Min et al. (2000)                               |
| Material = Groundmass                                      | Negative Intensities = Allowed                                  |
| Location = Kerguelen Plateau                               | Decay Constant 40K = 5.543 ± 0.044 E-10 1/a                     |
| Analyst = Kyle Krawl                                       | Decay Constant 39Ar = 2.940 ± 0.029 E-07 1/h                    |
| Project = KERGUELEN                                        | Decay Constant 37Ar = 8.230 ± 0.082 E-04 1/h                    |
| Mass Discrimination Law = LIN                              | Decay Constant 36Cl = 2.236 ± 0.045 E-06 1/a                    |
| Irradiation = OSU2C13                                      | Decay Constant 40K(EC,β <sup>+</sup> ) = 0.580 ± 0.009 E-10 1/a |
| J = 0.00154115 ± 0.00000405                                | Decay Constant 40K(β <sup>-</sup> ) = 4.950 ± 0.043 E-10 1/a    |
| FCT-3 = 28.201 ± 0.023 Ma                                  | Atmospheric Ratio 40/36(a) = 295.50                             |
| IGSN = Undefined                                           | Atmospheric Ratio 38/36(a) = 0.1869                             |
| Preferred Age = Undefined                                  | Production Ratio 39/37(ca) = 0.000673                           |
| Classification = Undefined                                 | Production Ratio 38/37(ca) = 0.000139                           |
| Experiment Type = Undefined                                | Production Ratio 36/37(ca) = 0.000264                           |
| Extraction Method = Undefined                              | Production Ratio 40/39(k) = 0.001010                            |
| Heating = 0 sec                                            | Production Ratio 38/39(k) = 0.011380                            |
| Isolation = 15.00 min                                      | Production Ratio 36/38(cl) = 316.00 ± 15.80                     |
| Instrument = MAP215-50                                     | Scaling Ratio K/Ca = 0.430                                      |
| Lithology = Undefined                                      | Abundance Ratio 40K/K = 1.1700 ± 0.0199 E-04                    |
| Lat-Lon = Undefined - Undefined                            | Atomic Weight K = 39.0983 ± 0.0001 g                            |
| R1 ratio = Undefined                                       | Recalibrated to FCT-3 Secondary Standard                        |
| R2 ratio = Undefined                                       | Standard Age = 28.201 ± 0.023 Ma                                |
| R3 ratio = Undefined                                       |                                                                 |
| R4 ratio = Undefined                                       |                                                                 |
| R5 ratio = Undefined                                       |                                                                 |
| Collector Calibrations =                                   |                                                                 |

| Results                          | 40(a)/36(a) ± 2σ      | 40(r)/39(k) ± 2σ          | Age ± 2σ (Ma)                                         | MSWD           | 39Ar(k) (%.n)                              | K/Ca ± 2σ            |
|----------------------------------|-----------------------|---------------------------|-------------------------------------------------------|----------------|--------------------------------------------|----------------------|
| Age Plateau<br>Recalibrated      |                       | 7.06621 ± 0.06478 ± 0.92% | 19.54 ± 0.21 ± 1.05%                                  | 0.42<br>83%    | 94.93<br>6                                 | 0.171 ± 0.099        |
|                                  |                       |                           | Full External Error ± 0.49<br>Analytical Error ± 0.18 | 2.26<br>1.0000 | 2σ Confidence Limit<br>Error Magnification |                      |
| Total Fusion Age<br>Recalibrated |                       | 7.15757 ± 0.07988 ± 1.12% | 19.79 ± 0.24 ± 1.23%                                  |                | 8                                          | 0.241 ± 0.005        |
|                                  |                       |                           | Full External Error ± 0.51<br>Analytical Error ± 0.22 |                |                                            |                      |
| Normal Isochron<br>Recalibrated  | 295.68 ± 0.92 ± 0.31% | 7.05116 ± 0.09951 ± 1.41% | 19.50 ± 0.29 ± 1.50%                                  | 0.49<br>74%    | 94.93<br>6                                 |                      |
|                                  |                       |                           | Full External Error ± 0.53<br>Analytical Error ± 0.27 | 2.41<br>1.0000 | 2σ Confidence Limit<br>Error Magnification |                      |
|                                  |                       |                           |                                                       |                | 11                                         | Number of Iterations |
|                                  |                       |                           |                                                       | 0.0000000621   | Convergence                                |                      |
| Inverse Isochron<br>Recalibrated | 295.68 ± 0.92 ± 0.31% | 7.05129 ± 0.09956 ± 1.41% | 19.50 ± 0.29 ± 1.50%                                  | 0.49<br>74%    | 94.93<br>6                                 |                      |
|                                  |                       |                           | Full External Error ± 0.53<br>Analytical Error ± 0.27 | 2.41<br>1.0000 | 2σ Confidence Limit<br>Error Magnification |                      |
|                                  |                       |                           |                                                       |                | 5                                          | Number of Iterations |
|                                  |                       |                           |                                                       | 0.0000000274   | Convergence                                |                      |
|                                  |                       |                           |                                                       | 31%            | Spreading Factor                           |                      |



| OSU Argon Geochronology Lab |         |                |             |                |           |                 |           |                 |           |                 |           |                |           |                |           |                |           |                 |           |                 |           |                |           |                 |           |                |           |                |           |                |           |                |           |      |
|-----------------------------|---------|----------------|-------------|----------------|-----------|-----------------|-----------|-----------------|-----------|-----------------|-----------|----------------|-----------|----------------|-----------|----------------|-----------|-----------------|-----------|-----------------|-----------|----------------|-----------|-----------------|-----------|----------------|-----------|----------------|-----------|----------------|-----------|----------------|-----------|------|
| Degassing<br>Patterns       |         | 36Ar(a)<br>[V] | %1σ         | 36Ar(c)<br>[V] | %1σ       | 36Ar(ca)<br>[V] | %1σ       | 36Ar(cl)<br>[V] | %1σ       | 37Ar(ca)<br>[V] | %1σ       | 38Ar(a)<br>[V] | %1σ       | 38Ar(c)<br>[V] | %1σ       | 38Ar(k)<br>[V] | %1σ       | 38Ar(ca)<br>[V] | %1σ       | 38Ar(cl)<br>[V] | %1σ       | 39Ar(k)<br>[V] | %1σ       | 39Ar(ca)<br>[V] | %1σ       | 40Ar(r)<br>[V] | %1σ       | 40Ar(a)<br>[V] | %1σ       | 40Ar(c)<br>[V] | %1σ       | 40Ar(k)<br>[V] | %1σ       |      |
|                             | 13C2101 | 500 °C         | 0.0212096   | 0.13           | 0.0000000 | 0.00            | 0.0000028 | 3.38            | 0.0000001 | 11.17           | 0.0107536 | 3.38           | 0.0039641 | 0.13           | 0.0000000 | 0.00           | 0.0001405 | 0.55            | 0.0000015 | 3.38            | 0.0003206 | 12.40          | 0.0123449 | 0.55            | 0.0000072 | 3.38           | 0.1177925 | 7.23           | 6.267424  | 0.13           | 0.0000000 | 0.00           | 0.0000125 | 0.55 |
|                             | 13C2103 | 600 °C         | ✓ 0.0112417 | 0.21           | 0.0000000 | 0.00            | 0.0000056 | 2.51            | 0.0000000 | 24.85           | 0.0213770 | 2.51           | 0.0021011 | 0.21           | 0.0000000 | 0.00           | 0.0001798 | 0.43            | 0.0000030 | 2.51            | 0.0001047 | 25.43          | 0.0157960 | 0.43            | 0.0000144 | 2.51           | 0.1148895 | 6.50           | 3.321928  | 0.21           | 0.0000000 | 0.00           | 0.0000160 | 0.43 |
|                             | 13C2104 | 700 °C         | ✓ 0.0198715 | 0.15           | 0.0000000 | 0.00            | 0.0000276 | 2.26            | 0.0000001 | 13.63           | 0.1045178 | 2.26           | 0.0037140 | 0.15           | 0.0000000 | 0.00           | 0.0008331 | 0.13            | 0.0000145 | 2.26            | 0.0003375 | 14.66          | 0.0732114 | 0.13            | 0.0000703 | 2.26           | 0.5145136 | 1.78           | 5.872042  | 0.15           | 0.0000000 | 0.00           | 0.0000739 | 0.13 |
|                             | 13C2106 | 800 °C         | ✓ 0.0149015 | 0.22           | 0.0000000 | 0.00            | 0.0000465 | 2.22            | 0.0000001 | 15.44           | 0.1762408 | 2.22           | 0.0027851 | 0.22           | 0.0000000 | 0.00           | 0.0016537 | 0.17            | 0.0000245 | 2.22            | 0.0002698 | 16.36          | 0.1453124 | 0.17            | 0.0001186 | 2.22           | 1.0387373 | 0.96           | 4.403401  | 0.22           | 0.0000000 | 0.00           | 0.0001468 | 0.17 |
|                             | 13C2107 | 900 °C         | ✓ 0.0090171 | 0.31           | 0.0000000 | 0.00            | 0.0000384 | 2.23            | 0.0000000 | 20.87           | 0.1453631 | 2.23           | 0.0016853 | 0.31           | 0.0000000 | 0.00           | 0.0016218 | 0.08            | 0.0000202 | 2.23            | 0.0001419 | 21.55          | 0.1425143 | 0.08            | 0.0000978 | 2.23           | 1.0024637 | 0.86           | 2.664558  | 0.31           | 0.0000000 | 0.00           | 0.0001439 | 0.08 |
|                             | 13C2109 | 1050 °C        | ✓ 0.0058366 | 0.33           | 0.0000000 | 0.00            | 0.0000421 | 2.23            | 0.0000000 | 57.56           | 0.1594327 | 2.23           | 0.0010909 | 0.33           | 0.0000000 | 0.00           | 0.0014185 | 0.11            | 0.0000222 | 2.23            | 0.0000706 | 57.81          | 0.1246480 | 0.11            | 0.0001073 | 2.23           | 0.8792309 | 0.74           | 1.724701  | 0.33           | 0.0000000 | 0.00           | 0.0001259 | 0.11 |
|                             | 13C2110 | 1250 °C        | ✓ 0.0038529 | 0.94           | 0.0000000 | 0.00            | 0.0000817 | 2.23            | 0.0000000 | 56.52           | 0.3094013 | 2.23           | 0.0007201 | 0.94           | 0.0000000 | 0.00           | 0.0008267 | 0.14            | 0.0000430 | 2.23            | 0.0000514 | 56.77          | 0.0726455 | 0.14            | 0.0002082 | 2.23           | 0.5099089 | 2.11           | 1.138533  | 0.94           | 0.0000000 | 0.00           | 0.0000734 | 0.14 |
|                             | 13C2112 | 1400 °C        | 0.0013419   | 1.45           | 0.0000000 | 0.00            | 0.0000402 | 2.24            | 0.0000000 | 61.08           | 0.1523419 | 2.24           | 0.0002508 | 1.45           | 0.0000000 | 0.00           | 0.0002083 | 0.36            | 0.0000212 | 2.24            | 0.0000367 | 61.31          | 0.0183023 | 0.36            | 0.0001025 | 2.24           | 0.1511843 | 3.82           | 0.396536  | 1.45           | 0.0000000 | 0.00           | 0.0000185 | 0.36 |
|                             |         | Σ              | 0.0872728   | 0.09           | 0.0000000 | 0.00            | 0.0002850 | 0.94            | 0.0000003 | 7.38            | 1.0794282 | 0.94           | 0.0163113 | 0.09           | 0.0000000 | 0.00           | 0.0068823 | 0.06            | 0.0001500 | 0.94            | 0.0013331 | 7.74           | 0.6047748 | 0.06            | 0.0007265 | 0.94           | 4.3287207 | 0.55           | 25.789123 | 0.09           | 0.0000000 | 0.00           | 0.0006108 | 0.06 |
|                             |         | Σ              |             |                |           |                 |           |                 | 0.0875581 | 0.09            | 1.0794282 | 0.94           |           |                |           |                |           |                 |           |                 | 0.0246768 | 0.42           |           |                 | 0.6055013 | 0.06           |           |                |           |                |           |                | 30.118455 | 0.11 |



| Additional Parameters |         |   | 40Ar/39Ar  | 1σ       | 37Ar/39Ar | 1σ       | 36Ar/39Ar | 1σ       | Time (days) | 37Ar (decay) | 39Ar (decay) | 40Ar (moles) |
|-----------------------|---------|---|------------|----------|-----------|----------|-----------|----------|-------------|--------------|--------------|--------------|
| 13C2101               | 500 °C  |   | 516.934563 | 2.857728 | 0.870585  | 0.029801 | 1.717316  | 0.009718 | 111.885     | 9.137758     | 1.00079065   | 1.277E-12    |
| 13C2103               | 600 °C  | ✓ | 217.378009 | 0.949259 | 1.352086  | 0.034500 | 0.711392  | 0.003425 | 111.922     | 9.144403     | 1.00079091   | 6.874E-13    |
| 13C2104               | 700 °C  | ✓ | 87.151694  | 0.116391 | 1.426246  | 0.032239 | 0.271544  | 0.000550 | 111.940     | 9.147665     | 1.00079104   | 1.277E-12    |
| 13C2106               | 800 °C  | ✓ | 37.421770  | 0.064072 | 1.211852  | 0.026988 | 0.102785  | 0.000288 | 111.975     | 9.154066     | 1.00079129   | 1.088E-12    |
| 13C2107               | 900 °C  | ✓ | 25.714254  | 0.026178 | 1.019290  | 0.022723 | 0.063498  | 0.000203 | 111.992     | 9.157206     | 1.00079141   | 7.334E-13    |
| 13C2109               | 1050 °C | ✓ | 20.873320  | 0.033677 | 1.277963  | 0.028504 | 0.047121  | 0.000165 | 112.027     | 9.163488     | 1.00079166   | 5.208E-13    |
| 13C2110               | 1250 °C | ✓ | 22.627747  | 0.038223 | 4.246886  | 0.094958 | 0.054007  | 0.000500 | 112.044     | 9.166631     | 1.00079178   | 3.297E-13    |
| 13C2112               | 1400 °C |   | 29.760569  | 0.111308 | 8.277270  | 0.187671 | 0.075097  | 0.001088 | 112.080     | 9.173046     | 1.00079203   | 1.095E-13    |



| Procedure |         | 36Ar      |           | 37Ar      |           | 38Ar      |           | 39Ar      |           | 40Ar      |           |
|-----------|---------|-----------|-----------|-----------|-----------|-----------|-----------|-----------|-----------|-----------|-----------|
|           |         | [V]       | 1σ        |
| 13C2101   | 500 °C  | 0.0003208 | 0.0000125 | 0.0000126 | 0.0000224 | 0.0000096 | 0.0000141 | 0.0000717 | 0.0000565 | 0.0048526 | 0.0002398 |
| 13C2103   | 600 °C  | 0.0003156 | 0.0000125 | 0.0000093 | 0.0000224 | 0.0000109 | 0.0000141 | 0.0000703 | 0.0000565 | 0.0047012 | 0.0002398 |
| 13C2104   | 700 °C  | 0.0003121 | 0.0000125 | 0.0000094 | 0.0000224 | 0.0000115 | 0.0000141 | 0.0000696 | 0.0000565 | 0.0046269 | 0.0002398 |
| 13C2106   | 800 °C  | 0.0003082 | 0.0000125 | 0.0000130 | 0.0000224 | 0.0000128 | 0.0000141 | 0.0000682 | 0.0000565 | 0.0044811 | 0.0002398 |
| 13C2107   | 900 °C  | 0.0003095 | 0.0000125 | 0.0000165 | 0.0000224 | 0.0000134 | 0.0000141 | 0.0000676 | 0.0000565 | 0.0044097 | 0.0002398 |
| 13C2109   | 1050 °C | 0.0003230 | 0.0000125 | 0.0000266 | 0.0000224 | 0.0000146 | 0.0000141 | 0.0000662 | 0.0000565 | 0.0042668 | 0.0002398 |
| 13C2110   | 1250 °C | 0.0003369 | 0.0000125 | 0.0000333 | 0.0000224 | 0.0000152 | 0.0000141 | 0.0000656 | 0.0000565 | 0.0041954 | 0.0002398 |
| 13C2112   | 1400 °C | 0.0003850 | 0.0000125 | 0.0000503 | 0.0000224 | 0.0000165 | 0.0000141 | 0.0000642 | 0.0000565 | 0.0040496 | 0.0002398 |



| OSU Argon Geochronology Lab |         |             |           |           |        |               |           |           |        |             |           |           |        |             |           |           |        |             |           |           |        |               |
|-----------------------------|---------|-------------|-----------|-----------|--------|---------------|-----------|-----------|--------|-------------|-----------|-----------|--------|-------------|-----------|-----------|--------|-------------|-----------|-----------|--------|---------------|
| Intercept<br>Values         |         | 36Ar<br>[V] | 1σ        | r2        |        | 37Ar<br>[V]   | 1σ        | r2        |        | 38Ar<br>[V] | 1σ        | r2        |        | 39Ar<br>[V] | 1σ        | r2        |        | 40Ar<br>[V] | 1σ        | r2        |        |               |
|                             | 13C2101 | 500 °C      | 0.0221682 | 0.0000251 | 0.9978 | LIN #         | 0.0012165 | 0.0000210 | 0.9939 | EXP #       | 0.0045069 | 0.0000281 | 0.6609 | LIN #       | 0.0125249 | 0.0000388 | 1.0000 | EXP #       | 6.4028879 | 0.0027716 | 0.9993 | EXP #         |
|                             | 13C2103 | 600 °C      | 0.0119000 | 0.0000214 | 0.9955 | LIN # 1       | 0.0024006 | 0.0000177 | 0.9689 | EXP # 4 8   | 0.0024375 | 0.0000211 | 0.6172 | LIN #       | 0.0160101 | 0.0000391 | 0.9998 | EXP #       | 3.4484318 | 0.0023031 | 0.9990 | EXP # 2 8     |
|                             | 13C2104 | 700 °C      | 0.0208070 | 0.0000290 | 0.9970 | EXP # 3 11    | 0.0116970 | 0.0000461 | 0.6939 | LIN # 1 4   | 0.0049890 | 0.0000401 | 0.1453 | LIN #       | 0.0739507 | 0.0000791 | 0.9996 | EXP #       | 6.4040650 | 0.0014194 | 0.9998 | EXP # 1       |
|                             | 13C2106 | 800 °C      | 0.0157039 | 0.0000320 | 0.9916 | EXP #         | 0.0197072 | 0.0000244 | 0.9968 | EXP # 6     | 0.0048214 | 0.0000364 | 0.0236 | LIN #       | 0.1466885 | 0.0002418 | 0.9154 | EXP # 1 2   | 5.4576815 | 0.0013543 | 0.9998 | EXP # 1       |
|                             | 13C2107 | 900 °C      | 0.0096364 | 0.0000259 | 0.9814 | LIN #         | 0.0162546 | 0.0000325 | 0.9912 | EXP # 9     | 0.0035380 | 0.0000248 | 0.0456 | LIN #       | 0.1438459 | 0.0001013 | 0.9878 | EXP # 7 8   | 3.6789330 | 0.0022679 | 0.9988 | EXP # 2       |
|                             | 13C2109 | 1050 °C     | 0.0063781 | 0.0000157 | 0.9830 | LIN # 3 5 9   | 0.0178242 | 0.0000349 | 0.9950 | EXP #       | 0.0026583 | 0.0000384 | 0.1364 | LIN #       | 0.1258417 | 0.0001316 | 0.9927 | EXP #       | 2.6135517 | 0.0029722 | 0.9964 | EXP # 6       |
|                             | 13C2110 | 1250 °C     | 0.0043899 | 0.0000349 | 0.8417 | LIN #         | 0.0345601 | 0.0000891 | 0.9945 | EXP #       | 0.0016827 | 0.0000248 | 0.2233 | LIN #       | 0.0735151 | 0.0000870 | 0.9846 | EXP # 2     | 1.6560225 | 0.0015108 | 0.9977 | EXP # 1 5     |
|                             | 13C2112 | 1400 °C     | 0.0018090 | 0.0000156 | 0.8959 | EXP # 7 10 11 | 0.0170370 | 0.0000494 | 0.9921 | EXP #       | 0.0005417 | 0.0000174 | 0.2049 | LIN # 3     | 0.0186178 | 0.0000340 | 0.9629 | EXP #       | 0.5528386 | 0.0005838 | 0.9962 | EXP # 1 2 4 9 |



| OSU Argon Geochronology Lab |  |         |          |          |            |                   |               |                  |       |                    |                    |                     |   |            |               |     |     |         |              |                        |       |       |      |      |     |        |             |         |       |         |         |            |         |    |
|-----------------------------|--|---------|----------|----------|------------|-------------------|---------------|------------------|-------|--------------------|--------------------|---------------------|---|------------|---------------|-----|-----|---------|--------------|------------------------|-------|-------|------|------|-----|--------|-------------|---------|-------|---------|---------|------------|---------|----|
| Sample Parameters           |  | Sample  | Material | Location | Analyst    | Temp              | Standard Name | Standard (in Ma) | %1σ   | Standard Reference | Standard 40Ar/39Ar | %1σ                 | J | %1σ        | Air 40Ar/36Ar | %1σ | MDF | %1σ     | Volume Ratio | Sensitivity (mol/volt) | Day   | Month | Year | Hour | Min | Resist | Irradiation | X-pos   | Y-pos | Z/H-pos | Project | Experiment | Nmb     |    |
|                             |  | 13C2101 | 500 °C   | 205-2    | Groundmass | Kerguelen Plateau | Kyle Krawl    | 500              | FCT-3 | 28.201             | 0.083              | Kuiper et al., 2008 |   | 0.00154115 | 0.263         |     |     | 1.00697 | 0.001        | 0.998                  | 2E-13 | 26    | JUL  | 2013 | 13  | 15     | 1           | OSU2C13 | 0.00  | 0.00    | 47.40   | Kerguelen  | 13C2101 | 01 |
|                             |  | 13C2103 | 600 °C   | 205-2    | Groundmass | Kerguelen Plateau | Kyle Krawl    | 600              | FCT-3 | 28.201             | 0.083              | Kuiper et al., 2008 |   | 0.00154115 | 0.263         |     |     | 1.00697 | 0.001        | 0.998                  | 2E-13 | 26    | JUL  | 2013 | 14  | 8      | 1           | OSU2C13 | 0.00  | 0.00    | 47.40   | Kerguelen  | 13C2101 | 01 |
|                             |  | 13C2104 | 700 °C   | 205-2    | Groundmass | Kerguelen Plateau | Kyle Krawl    | 700              | FCT-3 | 28.201             | 0.083              | Kuiper et al., 2008 |   | 0.00154115 | 0.263         |     |     | 1.00697 | 0.001        | 0.998                  | 2E-13 | 26    | JUL  | 2013 | 14  | 34     | 1           | OSU2C13 | 0.00  | 0.00    | 47.40   | Kerguelen  | 13C2101 | 01 |
|                             |  | 13C2106 | 800 °C   | 205-2    | Groundmass | Kerguelen Plateau | Kyle Krawl    | 800              | FCT-3 | 28.201             | 0.083              | Kuiper et al., 2008 |   | 0.00154115 | 0.263         |     |     | 1.00697 | 0.001        | 0.998                  | 2E-13 | 26    | JUL  | 2013 | 15  | 25     | 1           | OSU2C13 | 0.00  | 0.00    | 47.40   | Kerguelen  | 13C2101 | 01 |
|                             |  | 13C2107 | 900 °C   | 205-2    | Groundmass | Kerguelen Plateau | Kyle Krawl    | 900              | FCT-3 | 28.201             | 0.083              | Kuiper et al., 2008 |   | 0.00154115 | 0.263         |     |     | 1.00697 | 0.001        | 0.998                  | 2E-13 | 26    | JUL  | 2013 | 15  | 50     | 1           | OSU2C13 | 0.00  | 0.00    | 47.40   | Kerguelen  | 13C2101 | 01 |
|                             |  | 13C2109 | 1050 °C  | 205-2    | Groundmass | Kerguelen Plateau | Kyle Krawl    | 1050             | FCT-3 | 28.201             | 0.083              | Kuiper et al., 2008 |   | 0.00154115 | 0.263         |     |     | 1.00697 | 0.001        | 0.998                  | 2E-13 | 26    | JUL  | 2013 | 16  | 40     | 1           | OSU2C13 | 0.00  | 0.00    | 47.40   | Kerguelen  | 13C2101 | 01 |
|                             |  | 13C2110 | 1250 °C  | 205-2    | Groundmass | Kerguelen Plateau | Kyle Krawl    | 1250             | FCT-3 | 28.201             | 0.083              | Kuiper et al., 2008 |   | 0.00154115 | 0.263         |     |     | 1.00697 | 0.001        | 0.998                  | 2E-13 | 26    | JUL  | 2013 | 17  | 5      | 1           | OSU2C13 | 0.00  | 0.00    | 47.40   | Kerguelen  | 13C2101 | 01 |
|                             |  | 13C2112 | 1400 °C  | 205-2    | Groundmass | Kerguelen Plateau | Kyle Krawl    | 1400             | FCT-3 | 28.201             | 0.083              | Kuiper et al., 2008 |   | 0.00154115 | 0.263         |     |     | 1.00697 | 0.001        | 0.9981                 | 2E-13 | 26    | JUL  | 2013 | 17  | 56     | 1           | OSU2C13 | 0.00  | 0.00    | 47.40   | Kerguelen  | 13C2101 | 01 |



| Irradiation<br>Constants |         | OSU Argon Geochronology Lab |     |          |     |          |     |          |     |           |     |           |     |           |     |          |     |          |     |           |     |      |     |      |     |       |     |  |
|--------------------------|---------|-----------------------------|-----|----------|-----|----------|-----|----------|-----|-----------|-----|-----------|-----|-----------|-----|----------|-----|----------|-----|-----------|-----|------|-----|------|-----|-------|-----|--|
|                          |         | 40/36(a)                    | %1σ | 40/36(c) | %1σ | 38/36(a) | %1σ | 38/36(c) | %1σ | 39/37(ca) | %1σ | 38/37(ca) | %1σ | 36/37(ca) | %1σ | 40/39(k) | %1σ | 38/39(k) | %1σ | 36/38(cl) | %1σ | K/Ca | %1σ | K/Cl | %1σ | Ca/Cl | %1σ |  |
| 13C2101                  | 500 °C  | 295.5                       | 0   | 0.018    | 35  | 0.1869   | 0   | 1.493    | 3   | 0.000673  | 0   | 0.000139  | 0   | 0.000264  | 0   | 0.00101  | 0   | 0.01138  | 0   | 0         | 0   | 0.43 | 0   | 0    | 0   | 0     | 0   |  |
| 13C2103                  | 600 °C  | 295.5                       | 0   | 0.018    | 35  | 0.1869   | 0   | 1.493    | 3   | 0.000673  | 0   | 0.000139  | 0   | 0.000264  | 0   | 0.00101  | 0   | 0.01138  | 0   | 0         | 0   | 0.43 | 0   | 0    | 0   | 0     | 0   |  |
| 13C2104                  | 700 °C  | 295.5                       | 0   | 0.018    | 35  | 0.1869   | 0   | 1.493    | 3   | 0.000673  | 0   | 0.000139  | 0   | 0.000264  | 0   | 0.00101  | 0   | 0.01138  | 0   | 0         | 0   | 0.43 | 0   | 0    | 0   | 0     | 0   |  |
| 13C2106                  | 800 °C  | 295.5                       | 0   | 0.018    | 35  | 0.1869   | 0   | 1.493    | 3   | 0.000673  | 0   | 0.000139  | 0   | 0.000264  | 0   | 0.00101  | 0   | 0.01138  | 0   | 0         | 0   | 0.43 | 0   | 0    | 0   | 0     | 0   |  |
| 13C2107                  | 900 °C  | 295.5                       | 0   | 0.018    | 35  | 0.1869   | 0   | 1.493    | 3   | 0.000673  | 0   | 0.000139  | 0   | 0.000264  | 0   | 0.00101  | 0   | 0.01138  | 0   | 0         | 0   | 0.43 | 0   | 0    | 0   | 0     | 0   |  |
| 13C2109                  | 1050 °C | 295.5                       | 0   | 0.018    | 35  | 0.1869   | 0   | 1.493    | 3   | 0.000673  | 0   | 0.000139  | 0   | 0.000264  | 0   | 0.00101  | 0   | 0.01138  | 0   | 0         | 0   | 0.43 | 0   | 0    | 0   | 0     | 0   |  |
| 13C2110                  | 1250 °C | 295.5                       | 0   | 0.018    | 35  | 0.1869   | 0   | 1.493    | 3   | 0.000673  | 0   | 0.000139  | 0   | 0.000264  | 0   | 0.00101  | 0   | 0.01138  | 0   | 0         | 0   | 0.43 | 0   | 0    | 0   | 0     | 0   |  |
| 13C2112                  | 1400 °C | 295.5                       | 0   | 0.018    | 35  | 0.1869   | 0   | 1.493    | 3   | 0.000673  | 0   | 0.000139  | 0   | 0.000264  | 0   | 0.00101  | 0   | 0.01138  | 0   | 0         | 0   | 0.43 | 0   | 0    | 0   | 0     | 0   |  |



13C2101.AGE >>> 205-2 >>> KERGUELEN PROJECT

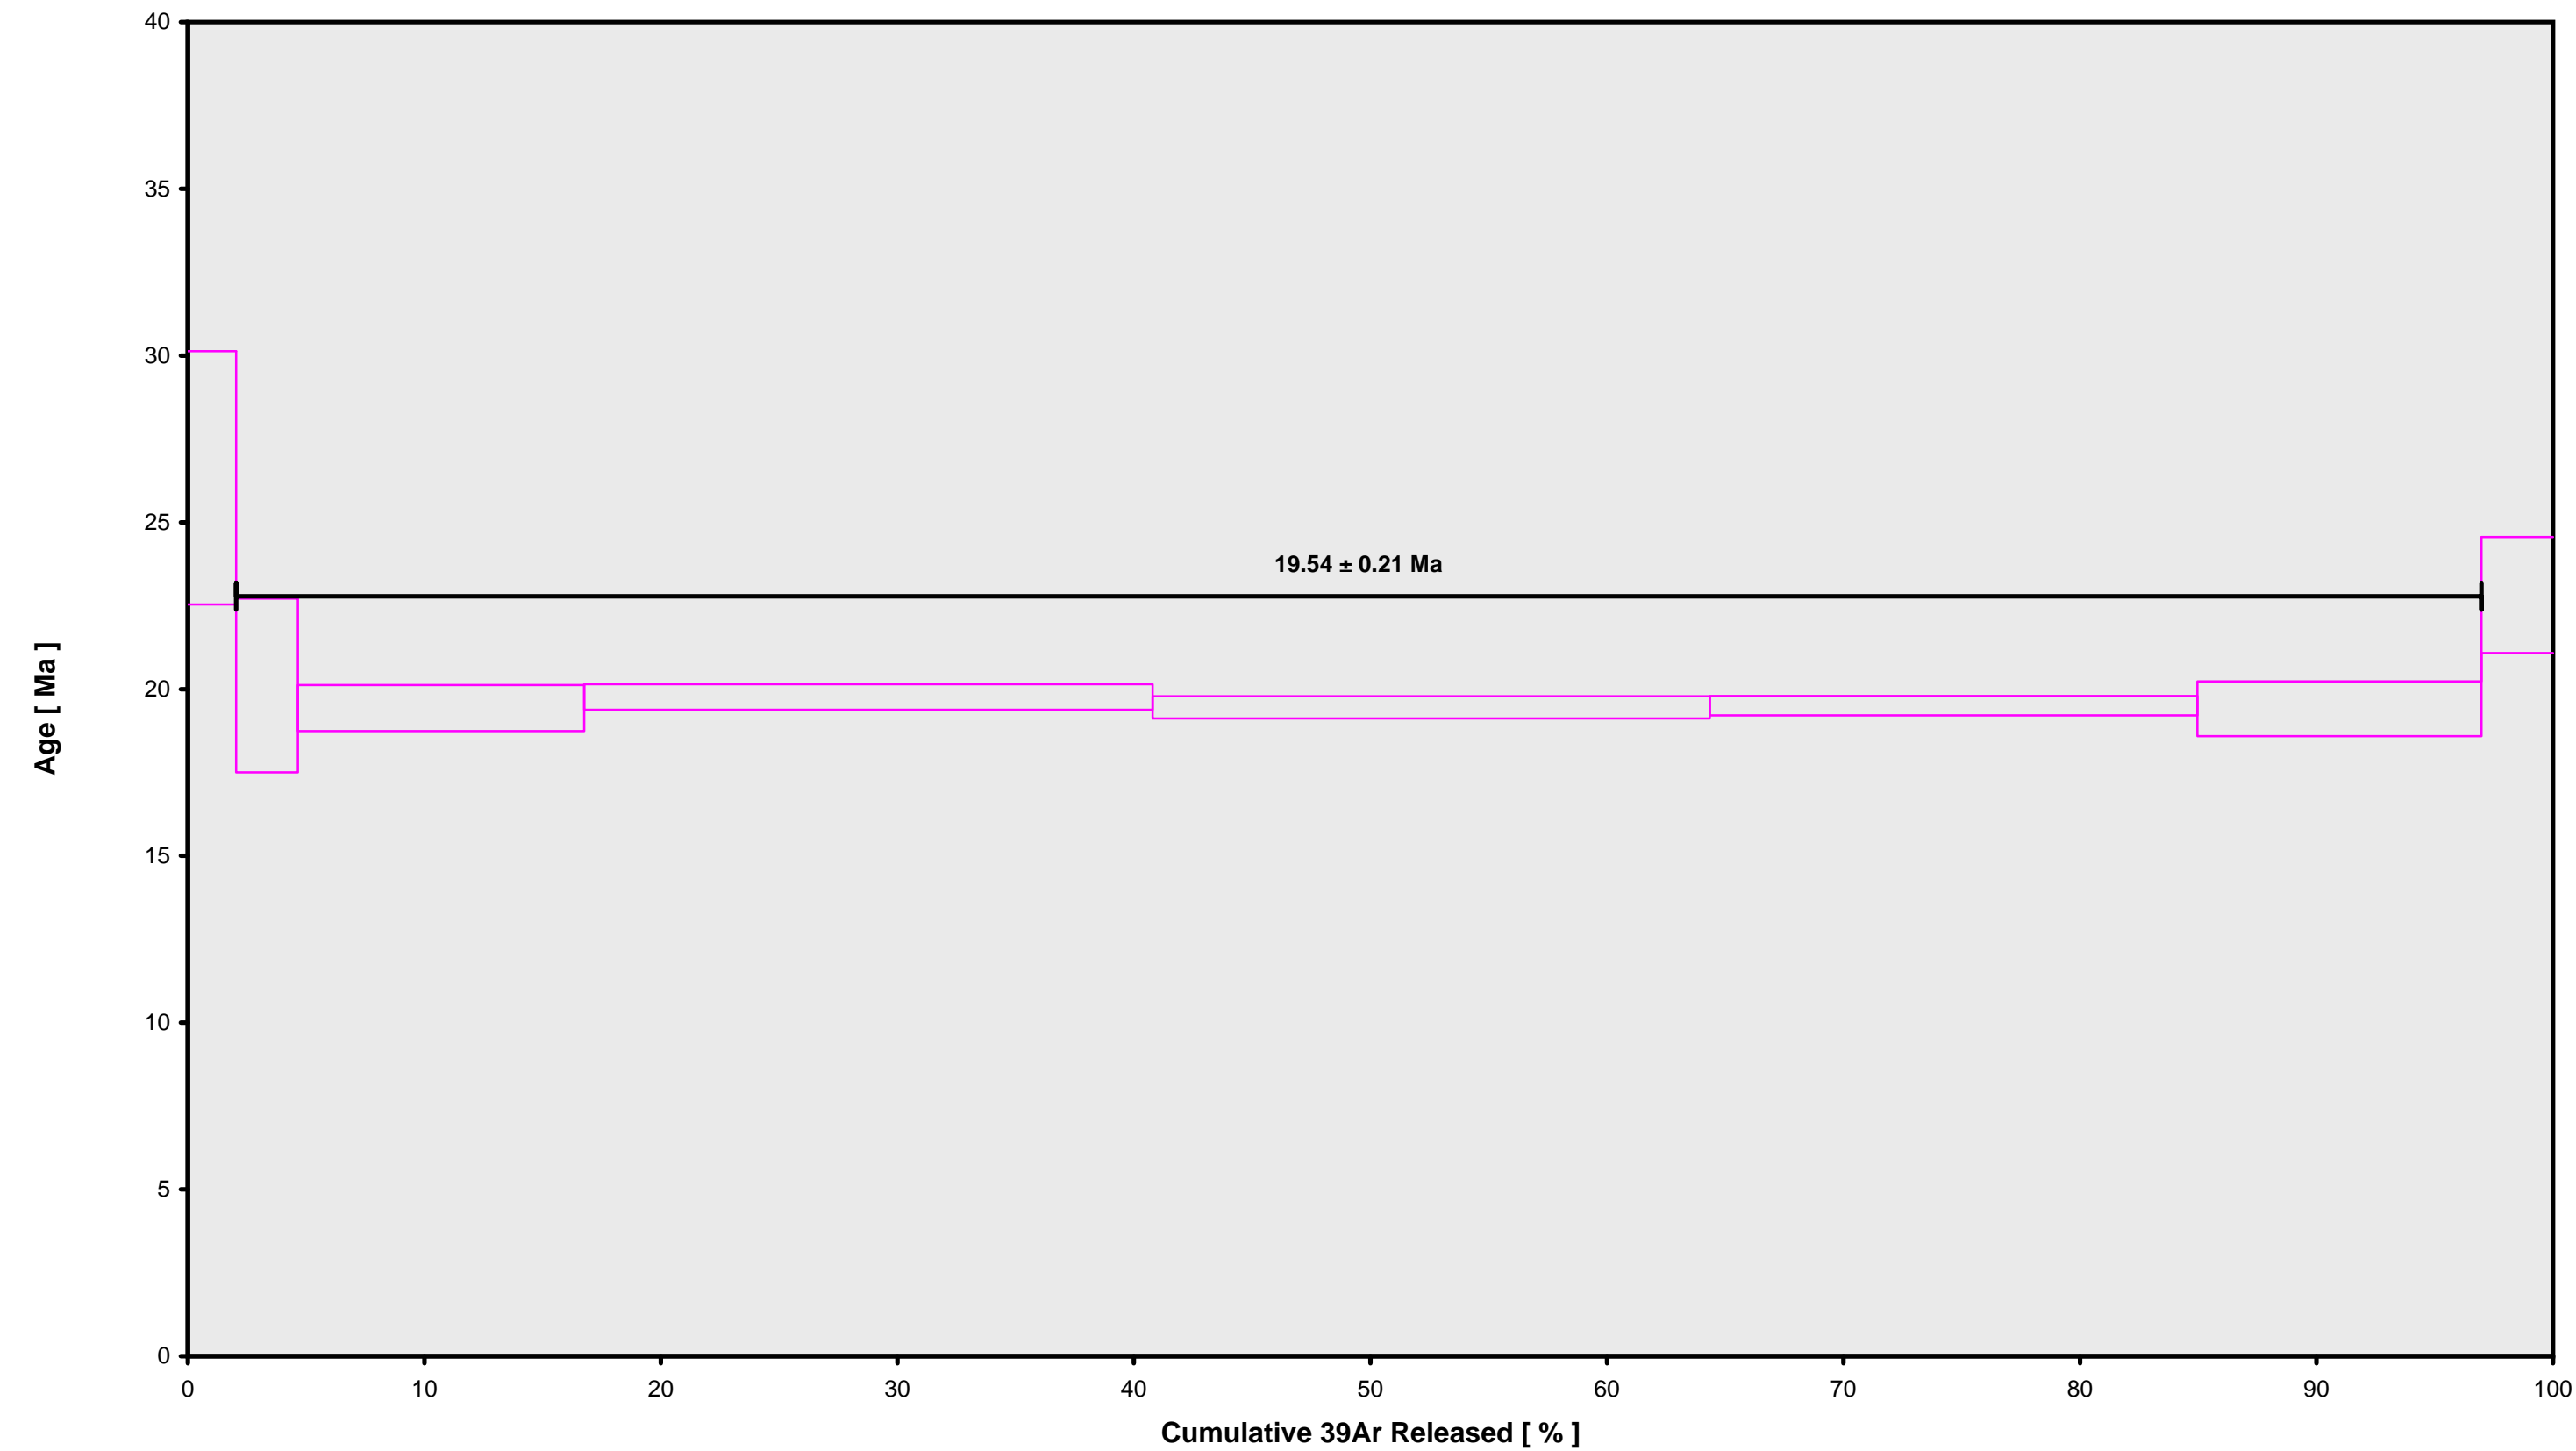

Ar-Ages in Ma

WEIGHTED PLATEAU

19.54 ± 0.21

TOTAL FUSION

19.79 ± 0.24

NORMAL ISOCHRON

19.50 ± 0.29

INVERSE ISOCHRON

19.50 ± 0.29

MSWD (PROBABILITY)

0.42 (83%)

Sample Info

Groundmass

Kerguelen Plateau

Kyle Krawl

IRR = OSU2C13

J = 0.00154115 ± 0.00000405

RECALIBRATED AGE



13C2101.AGE >>> 205-2 >>> KERGUELEN PROJECT

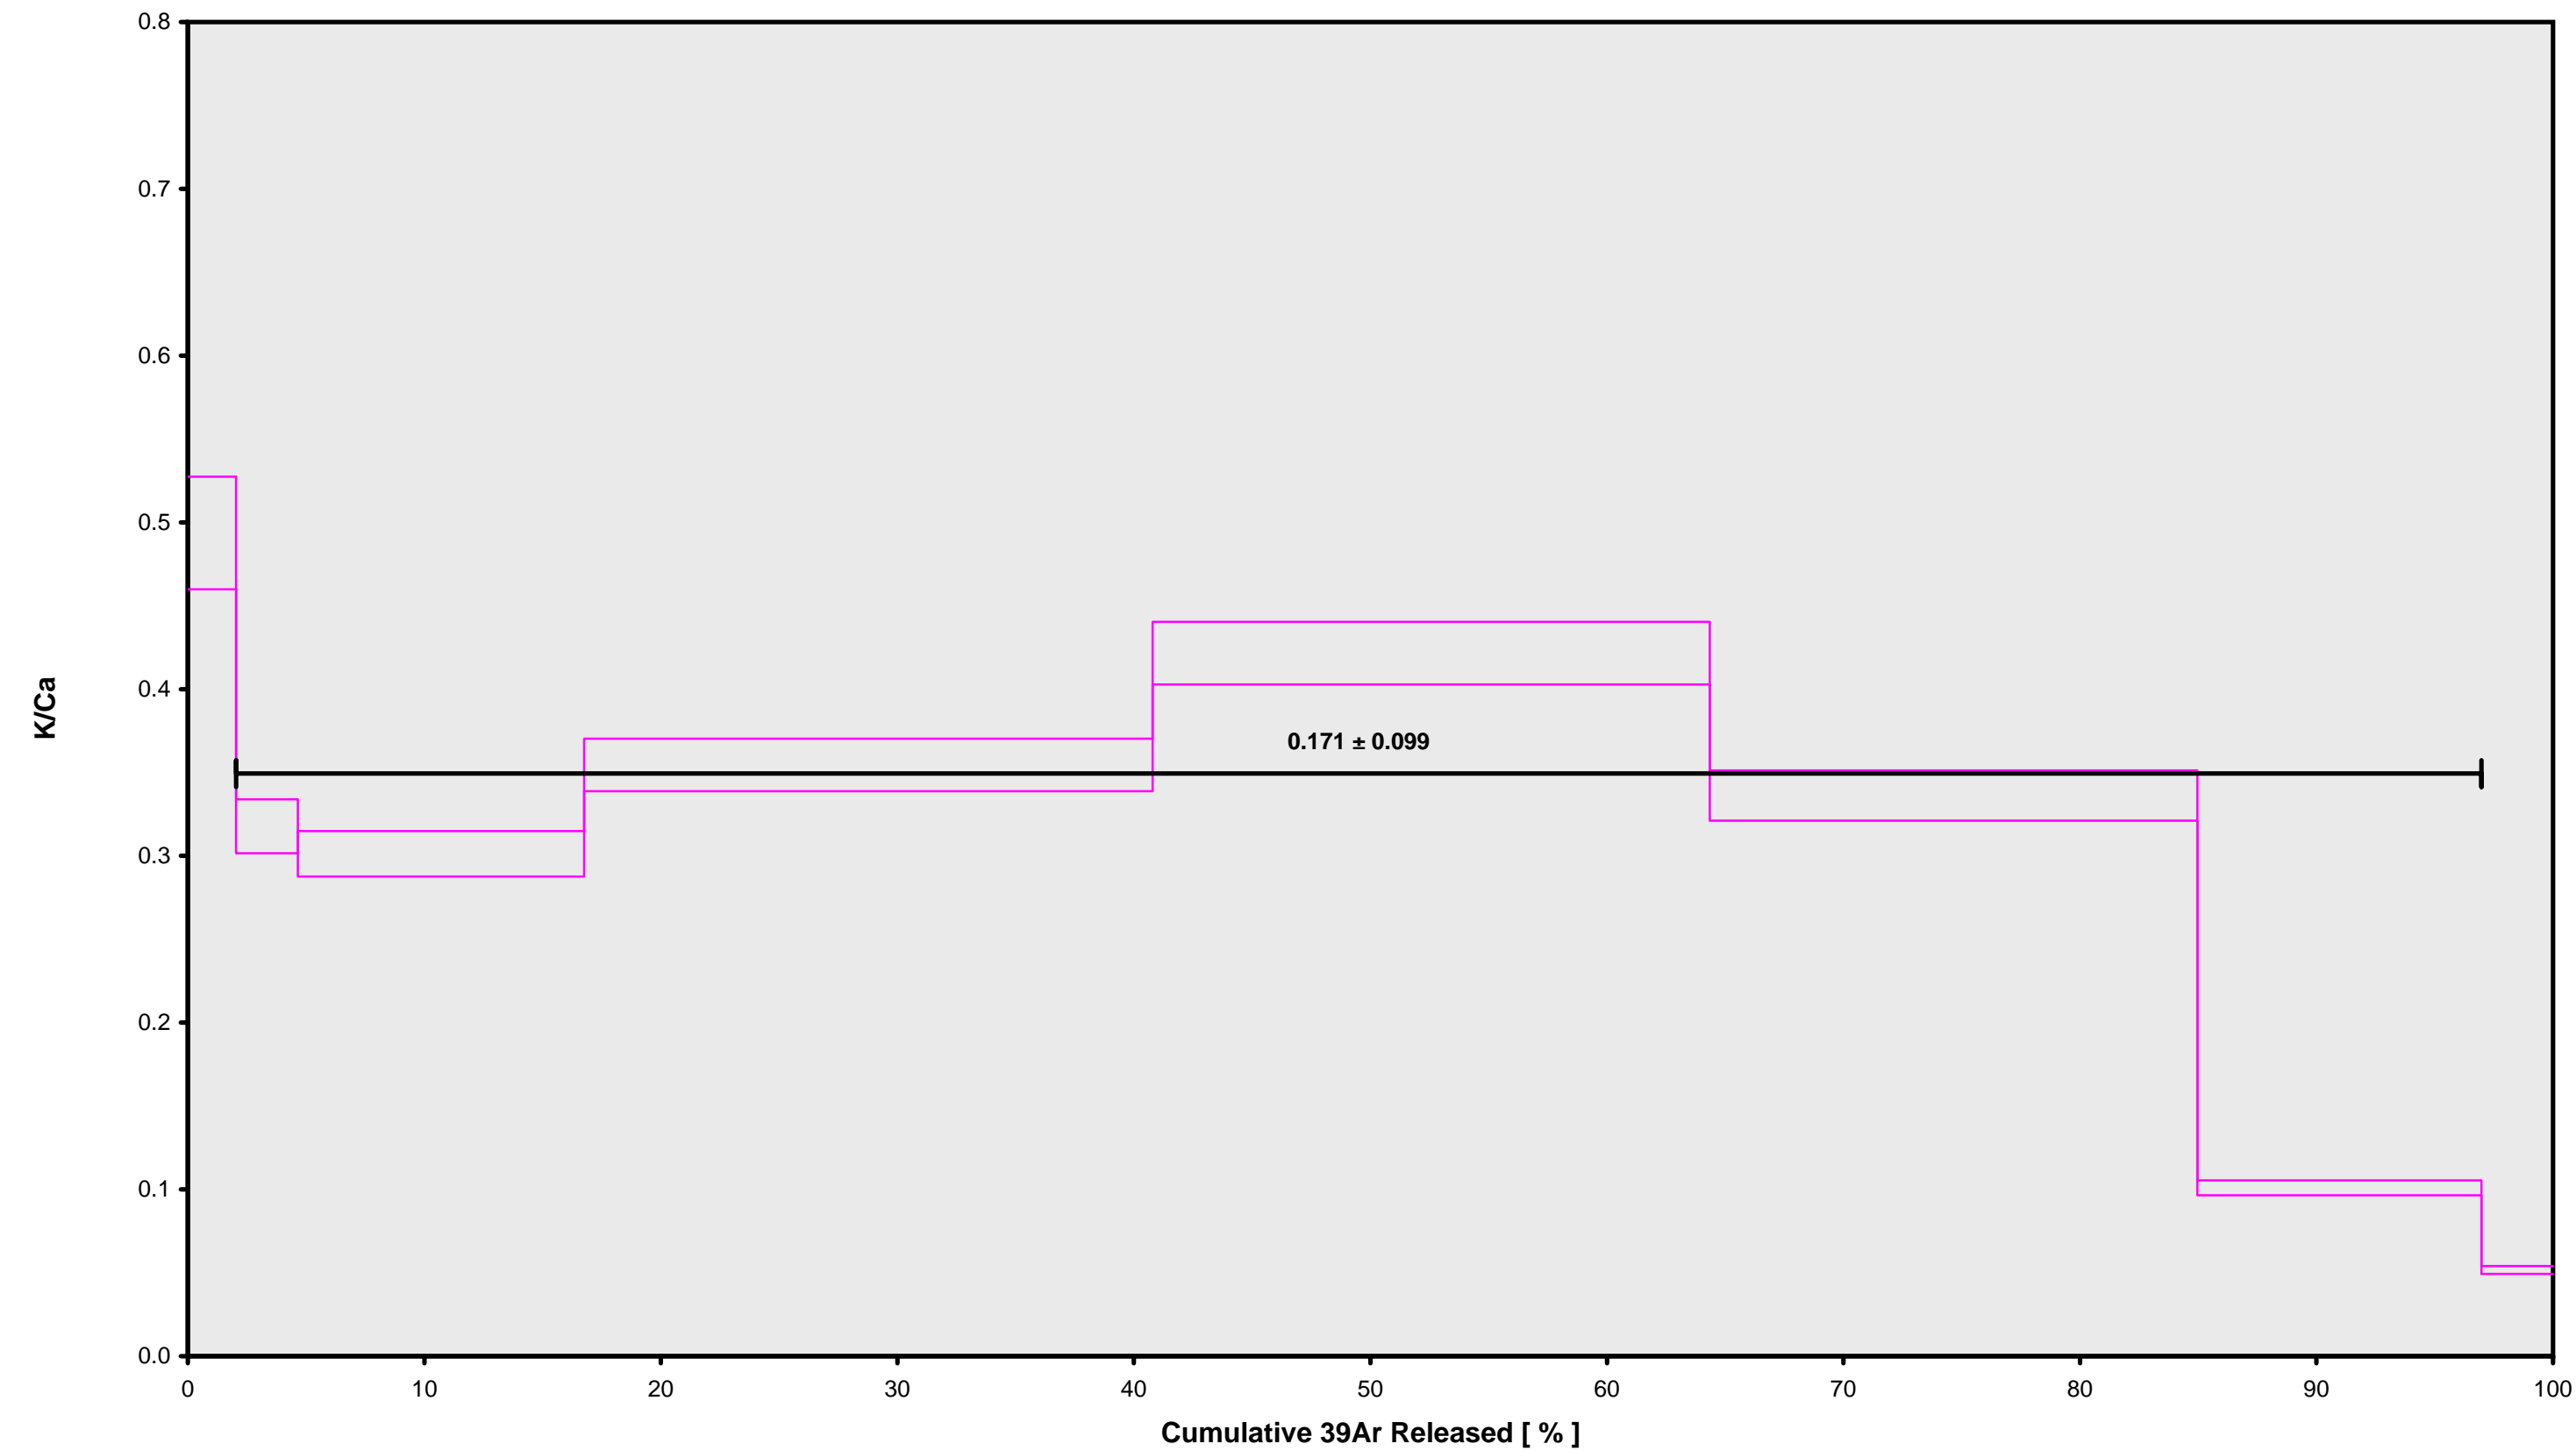

Ar-Ages in Ma

WEIGHTED PLATEAU

19.54  $\pm$  0.21

TOTAL FUSION

19.79  $\pm$  0.24

NORMAL ISOCHRON

19.50  $\pm$  0.29

INVERSE ISOCHRON

19.50  $\pm$  0.29

Sample Info

Groundmass

Kerguelen Plateau

Kyle Krawl

IRR = OSU2C13

J = 0.00154115  $\pm$  0.00000405

RECALIBRATED AGE



13C2101.AGE >>> 205-2 >>> KERGUELEN PROJECT

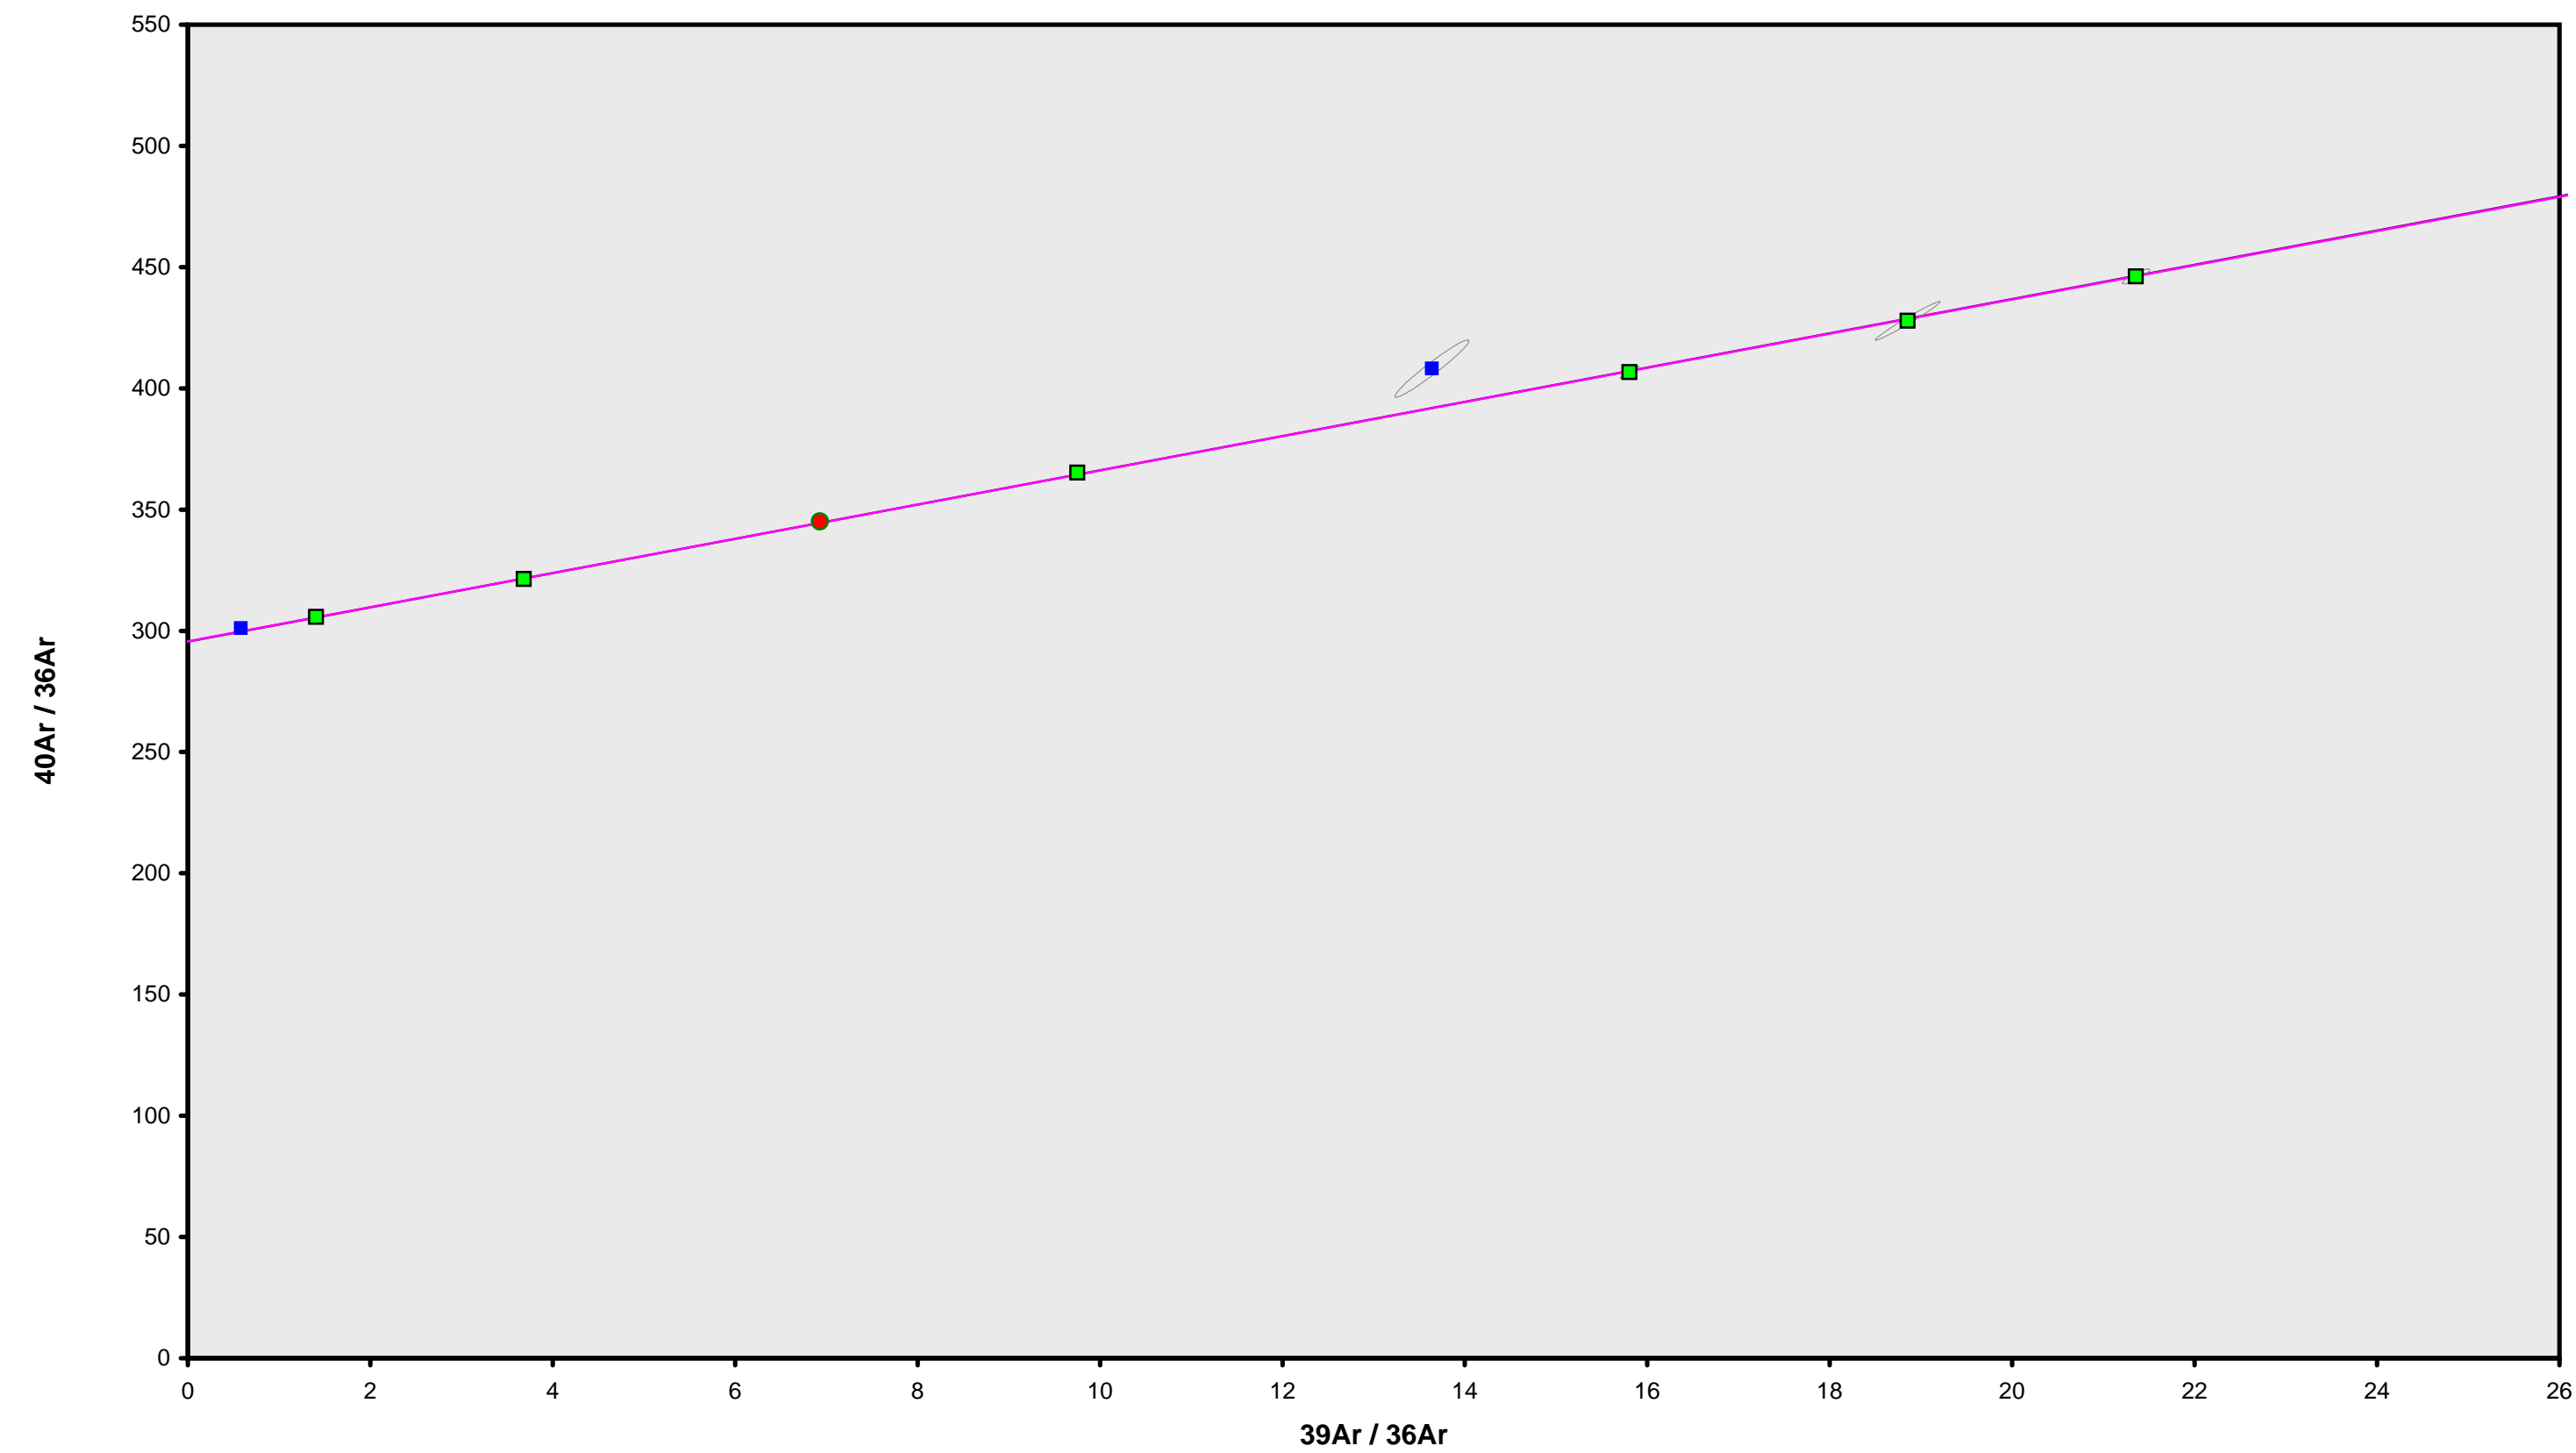

**Ar-Ages in Ma**

**WEIGHTED PLATEAU**  
19.54 ± 0.21

**TOTAL FUSION**  
19.79 ± 0.24

**NORMAL ISOCHRON**  
19.50 ± 0.29

**INVERSE ISOCHRON**  
19.50 ± 0.29

**MSWD (PROBABILITY)**  
0.49 (74%)

**40AR/36AR INTERCEPT**  
295.7 ± 0.9

**Sample Info**

Groundmass  
Kerguelen Plateau  
Kyle Krawl

IRR = OSU2C13  
J = 0.00154115 ± 0.00000405

**RECALIBRATED AGE**



13C2101.AGE >>> 205-2 >>> KERGUELEN PROJECT

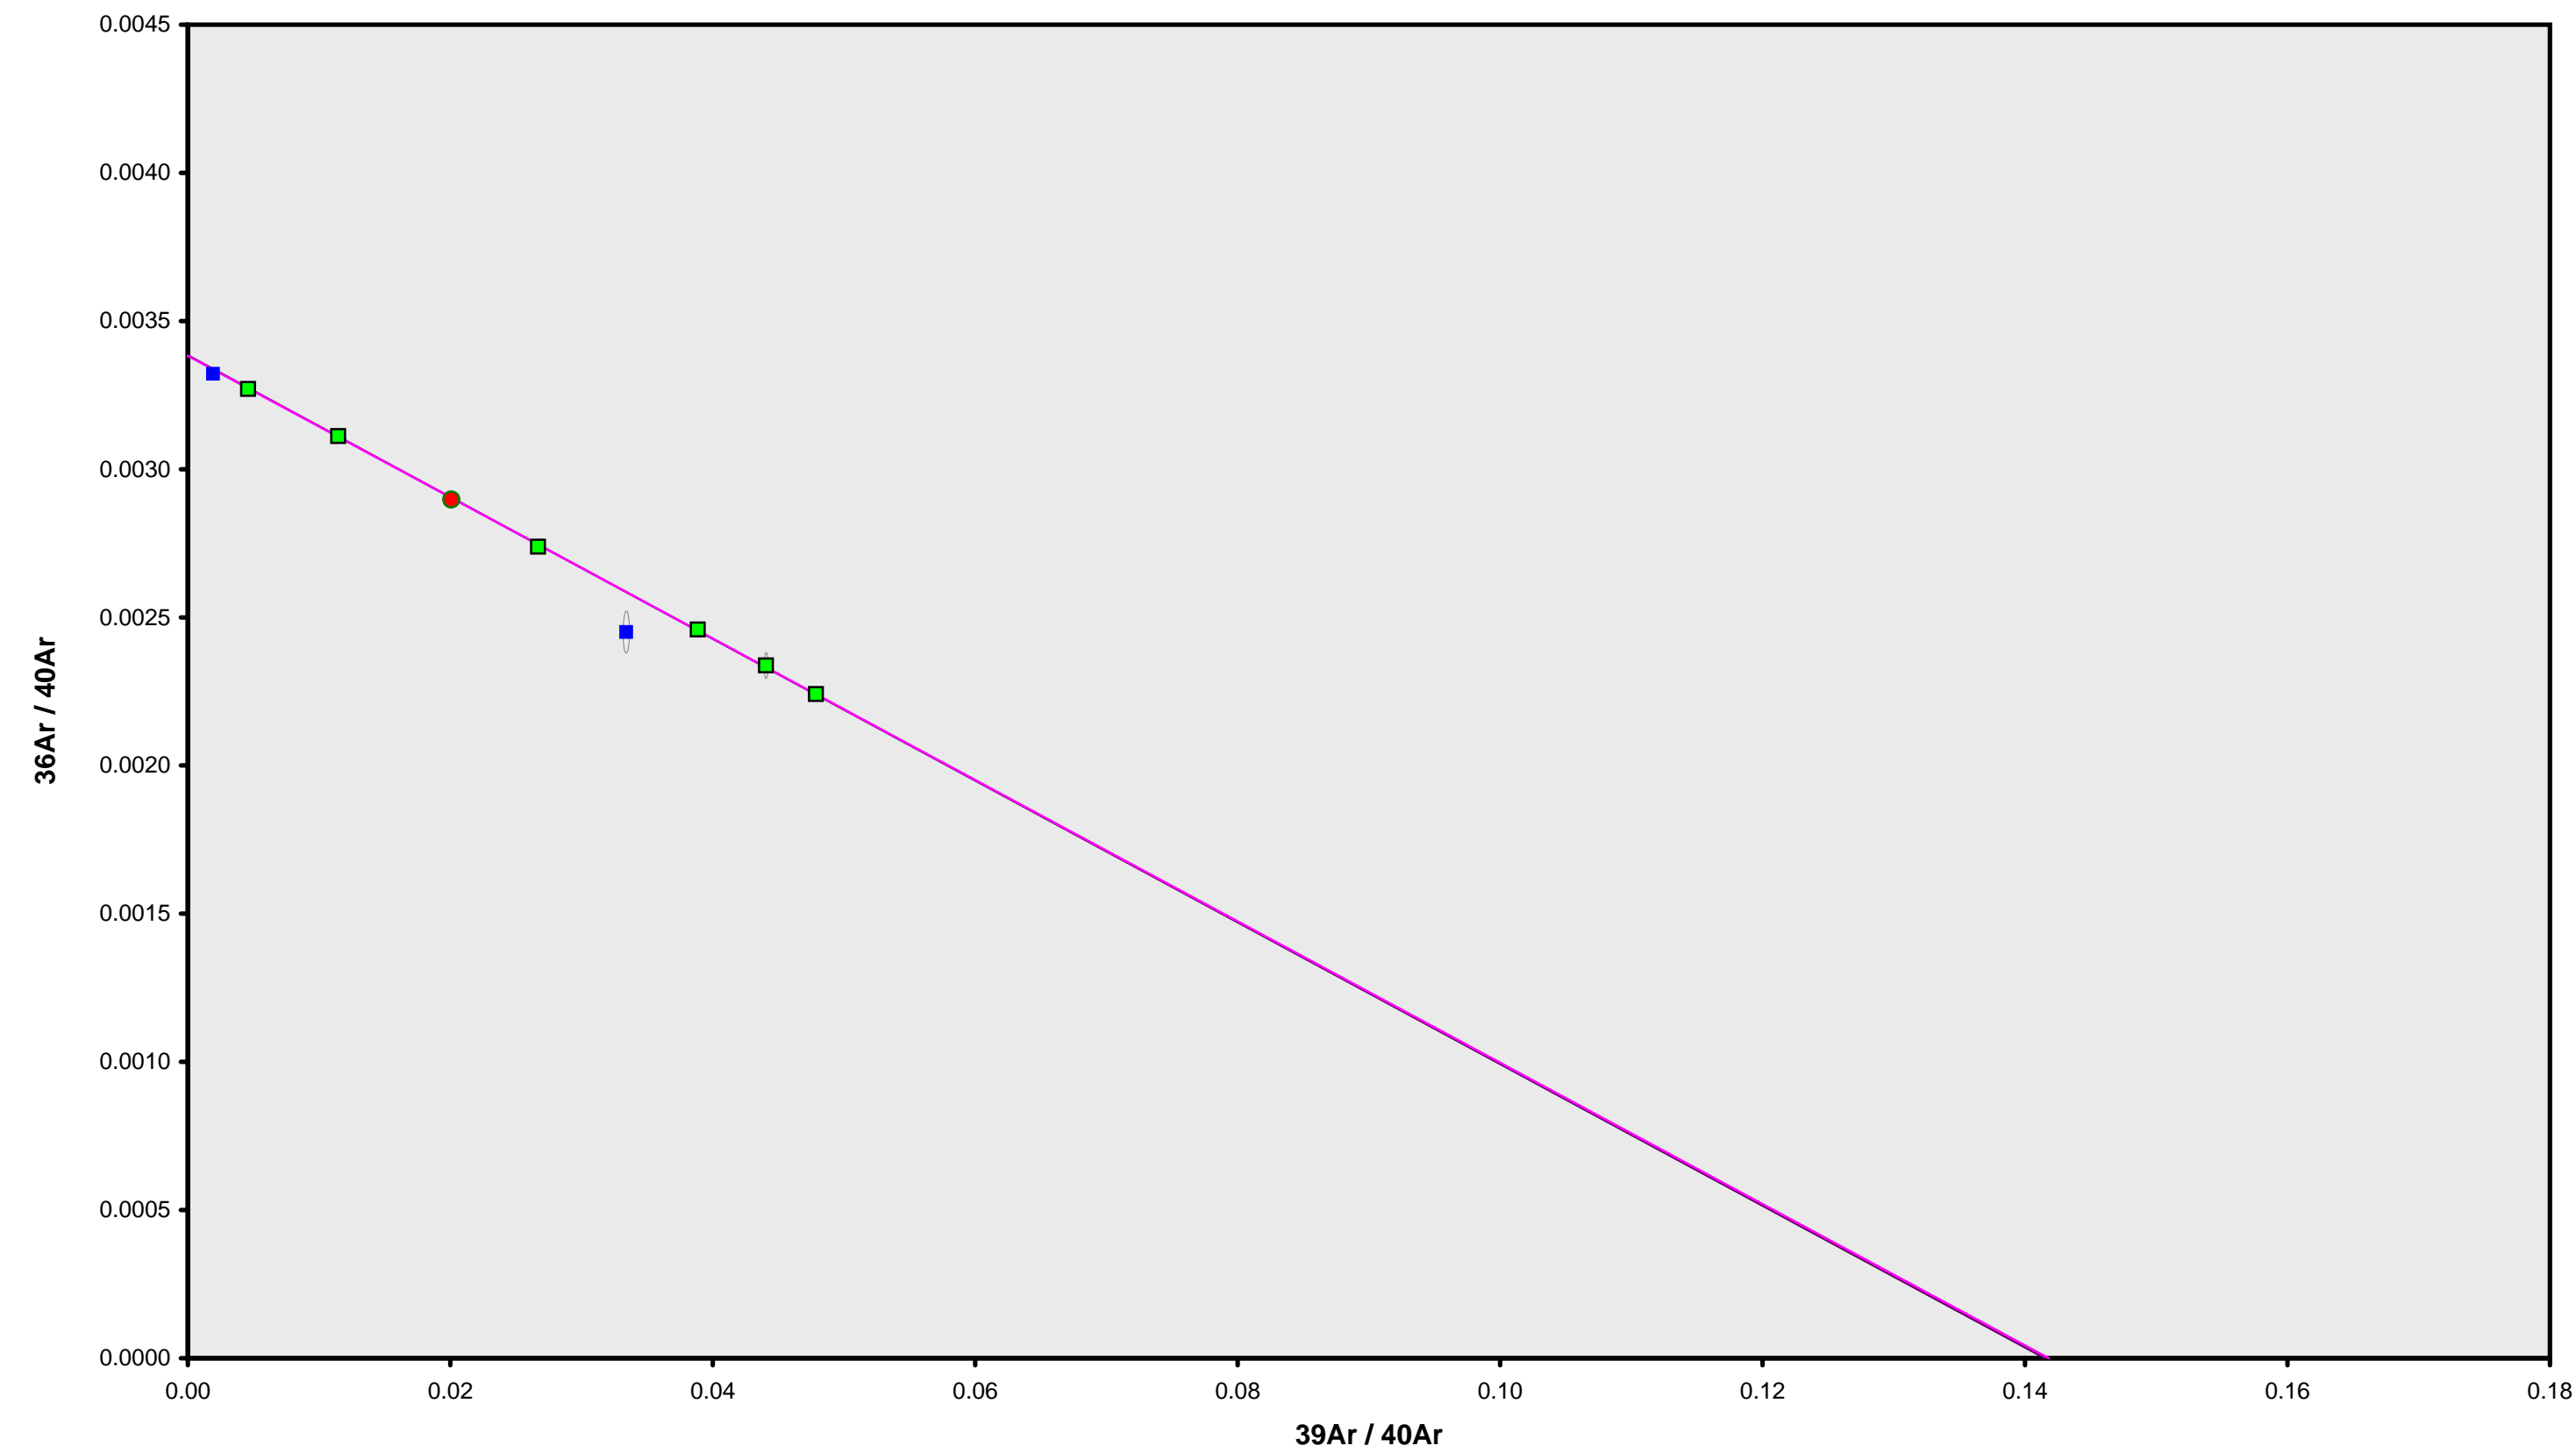

Ar-Ages in Ma

WEIGHTED PLATEAU

19.54 ± 0.21

TOTAL FUSION

19.79 ± 0.24

NORMAL ISOCHRON

19.50 ± 0.29

INVERSE ISOCHRON

19.50 ± 0.29

MSWD (PROBABILITY)

0.49 (74%)

SPREADING FACTOR

30.5%

40AR/36AR INTERCEPT

295.7 ± 0.9

Sample Info

Groundmass

Kerguelen Plateau

Kyle Krawl

IRR = OSU2C13

J = 0.00154115 ± 0.00000405

RECALIBRATED AGE



| Incremental Heating |           | 36Ar(a)<br>[V] | 37Ar(ca)<br>[V] | 38Ar(cl)<br>[V] | 39Ar(k)<br>[V] | 40Ar(r)<br>[V] | Age ± 2σ<br>(Ma) | 40Ar(r)<br>(%) | 39Ar(k)<br>(%) | K/Ca ± 2σ   |
|---------------------|-----------|----------------|-----------------|-----------------|----------------|----------------|------------------|----------------|----------------|-------------|
| 13C2088             | 500 °C    | 0.0170231      | 0.0124717       | 0.0002031       | 0.0103306      | 0.1577466      | 42.38 ± 6.16     | 3.04           | 1.05           | 0.36 ± 0.03 |
| 13C2090             | 600 °C    | 0.0188862      | 0.0497393       | 0.0003427       | 0.0453937      | 0.4452493      | 27.34 ± 1.11     | 7.39           | 4.60           | 0.39 ± 0.02 |
| 13C2091             | 700 °C ✓  | 0.0065594      | 0.0808431       | 0.0000090       | 0.0874854      | 0.6276700      | 20.04 ± 0.46     | 24.46          | 8.86           | 0.47 ± 0.02 |
| 13C2093             | 800 °C ✓  | 0.0024447      | 0.1239432       | 0.0000912       | 0.1741252      | 1.2324706      | 19.77 ± 0.15     | 63.04          | 17.64          | 0.60 ± 0.03 |
| 13C2094             | 900 °C ✓  | 0.0008154      | 0.1160810       | 0.0002233       | 0.2073490      | 1.4614139      | 19.69 ± 0.17     | 85.84          | 21.01          | 0.77 ± 0.03 |
| 13C2096             | 1050 °C ✓ | 0.0003725      | 0.1311458       | 0.0006073       | 0.2753243      | 1.9310503      | 19.59 ± 0.10     | 94.59          | 27.89          | 0.90 ± 0.04 |
| 13C2097             | 1250 °C ✓ | 0.0001330      | 0.1168199       | 0.0005113       | 0.1551181      | 1.0892475      | 19.61 ± 0.20     | 96.50          | 15.72          | 0.57 ± 0.03 |
| 13C2099             | 1400 °C ✓ | 0.0000528      | 0.0311212       | 0.0001393       | 0.0318952      | 0.2271900      | 19.89 ± 0.97     | 93.57          | 3.23           | 0.44 ± 0.02 |
| Σ                   |           | 0.0462869      | 0.6621651       | 0.0021272       | 0.9870214      | 7.1720383      |                  |                |                |             |

| Information on Analysis                                                                                                                                                                                                                      | Results          | 40(r)/39(k) ± 2σ  | Age ± 2σ<br>(Ma)           | MSWD   | 39Ar(k)<br>(%,n)    | K/Ca ± 2σ   |
|----------------------------------------------------------------------------------------------------------------------------------------------------------------------------------------------------------------------------------------------|------------------|-------------------|----------------------------|--------|---------------------|-------------|
| Sample = 205-1<br>Material = Groundmass<br>Location = Kerguelen Plateau<br>Analyst = Kyle Krawl<br>Project = KERGUELEN<br>Mass Discrimination Law = LIN<br>Irradiation = OSU2C13<br>J = 0.00155670 ± 0.00000405<br>FCT-3 = 28.201 ± 0.023 Ma | Age Plateau      | 7.03902 ± 0.03008 | 19.66 ± 0.13               | 1.43   | 94.35               | 0.56 ± 0.12 |
|                                                                                                                                                                                                                                              | Recalibrated     | ± 0.43%           | ± 0.67%                    | 21%    | 6                   |             |
|                                                                                                                                                                                                                                              |                  |                   | Full External Error ± 0.46 | 2.26   | 2σ Confidence Limit |             |
|                                                                                                                                                                                                                                              |                  |                   | Analytical Error ± 0.08    | 1.1947 | Error Magnification |             |
|                                                                                                                                                                                                                                              | Total Fusion Age | 7.26634 ± 0.04143 | 20.29 ± 0.16               |        | 8                   | 0.64 ± 0.01 |
|                                                                                                                                                                                                                                              | Recalibrated     | ± 0.57%           | ± 0.77%                    |        |                     |             |
|                                                                                                                                                                                                                                              |                  |                   | Full External Error ± 0.48 |        |                     |             |
|                                                                                                                                                                                                                                              |                  |                   | Analytical Error ± 0.12    |        |                     |             |



| Normal Isochron |         | 39(k)/36(a) ± 2σ |                  | 40(a+r)/36(a) ± 2σ | r.i.   |
|-----------------|---------|------------------|------------------|--------------------|--------|
| 13C2088         | 500 °C  |                  | 0.61 ± 0.01      | 304.77 ± 1.40      | 0.3742 |
| 13C2090         | 600 °C  |                  | 2.40 ± 0.01      | 319.08 ± 1.03      | 0.6892 |
| 13C2091         | 700 °C  | ✓                | 13.34 ± 0.10     | 391.19 ± 2.90      | 0.9517 |
| 13C2093         | 800 °C  | ✓                | 71.23 ± 0.91     | 799.65 ± 10.26     | 0.9949 |
| 13C2094         | 900 °C  | ✓                | 254.31 ± 12.44   | 2087.86 ± 102.04   | 0.9988 |
| 13C2096         | 1050 °C | ✓                | 739.18 ± 67.36   | 5479.89 ± 499.34   | 0.9999 |
| 13C2097         | 1250 °C | ✓                | 1166.38 ± 323.53 | 8485.87 ± 2353.79  | 1.0000 |
| 13C2099         | 1400 °C | ✓                | 604.52 ± 426.86  | 4601.54 ± 3249.05  | 1.0000 |

| Results                           | 40(a)/36(a) ± 2σ      |        | 40(r)/39(k) ± 2σ          |                            | Age ± 2σ (Ma) | MSWD |
|-----------------------------------|-----------------------|--------|---------------------------|----------------------------|---------------|------|
| Normal Isochron<br>No Convergence | 298.00 ± 2.15 ± 0.72% |        | 7.02292 ± 0.02825 ± 0.40% | 19.62 ± 0.13 ± 0.65%       | 0.42          |      |
|                                   |                       |        |                           |                            | 80%           |      |
|                                   |                       |        |                           |                            |               |      |
|                                   |                       |        |                           | Full External Error ± 0.46 |               |      |
|                                   |                       |        |                           | Analytical Error ± 0.08    |               |      |
| Statistics                        | 2σ Confidence Limit   | 2.41   | Convergence               | 0.000001049610             |               |      |
|                                   | Error Magnification   | 1.0000 | Number of Iterations      | 500                        |               |      |
|                                   | Number of Data Points | 6      | Calculated Line           | Weighted York-2            |               |      |



| Inverse Isochron |           | 39(k)/40(a+r) ± 2σ    |  | 36(a)/40(a+r) ± 2σ      | r.i.   |
|------------------|-----------|-----------------------|--|-------------------------|--------|
| 13C2088          | 500 °C    | 0.0019912 ± 0.0000205 |  | 0.00328120 ± 0.00001504 | 0.0411 |
| 13C2090          | 600 °C    | 0.0075328 ± 0.0000228 |  | 0.00313406 ± 0.00001014 | 0.1237 |
| 13C2091          | 700 °C ✓  | 0.0340943 ± 0.0000812 |  | 0.00255630 ± 0.00001892 | 0.0106 |
| 13C2093          | 800 °C ✓  | 0.0890727 ± 0.0001150 |  | 0.00125055 ± 0.00001605 | 0.0450 |
| 13C2094          | 900 °C ✓  | 0.1218015 ± 0.0002921 |  | 0.00047896 ± 0.00002341 | 0.0112 |
| 13C2096          | 1050 °C ✓ | 0.1348891 ± 0.0001623 |  | 0.00018249 ± 0.00001663 | 0.0032 |
| 13C2097          | 1250 °C ✓ | 0.1374495 ± 0.0002167 |  | 0.00011784 ± 0.00003269 | 0.0018 |
| 13C2099          | 1400 °C ✓ | 0.1313743 ± 0.0008948 |  | 0.00021732 ± 0.00015344 | 0.0014 |

| Results                          | 40(a)/36(a) ± 2σ      |        | 40(r)/39(k) ± 2σ           | Age ± 2σ (Ma)   | MSWD |
|----------------------------------|-----------------------|--------|----------------------------|-----------------|------|
| Inverse Isochron<br>Recalibrated | 297.99 ± 2.16         |        | 7.02364 ± 0.02867          | 19.62 ± 0.13    | 0.43 |
|                                  | ± 0.72%               |        | ± 0.41%                    | ± 0.66%         | 79%  |
|                                  |                       |        | Full External Error ± 0.46 |                 |      |
|                                  |                       |        | Analytical Error ± 0.08    |                 |      |
| Statistics                       | 2σ Confidence Limit   | 2.41   | Convergence                | 0.0000002297    |      |
|                                  | Error Magnification   | 1.0000 | Number of Iterations       | 3               |      |
|                                  | Number of Data Points | 6      | Calculated Line            | Weighted York-2 |      |
|                                  | Spreading Factor      | 72.6%  |                            |                 |      |



| OSU Argon Geochronology Lab |         |          |           |           |           |           |           |           |           |           |           |                    |               |             |             |             |
|-----------------------------|---------|----------|-----------|-----------|-----------|-----------|-----------|-----------|-----------|-----------|-----------|--------------------|---------------|-------------|-------------|-------------|
| Relative Abundances         |         | 40Ar [V] | 1σ        | 39Ar [V]  | 1σ        | 38Ar [V]  | 1σ        | 37Ar [V]  | 1σ        | 36Ar [V]  | 1σ        | 40(r)/39(k) ± 2σ   | Age ± 2σ (Ma) | 40Ar(r) (%) | 39Ar(k) (%) | K/Ca ± 2σ   |
| 13C2088                     | 500 °C  | 5.188070 | 0.0036154 | 0.0103389 | 0.0000528 | 0.0035040 | 0.0000413 | 0.0124717 | 0.0004767 | 0.0170264 | 0.0000372 | 15.26991 ± 2.24447 | 42.38 ± 6.16  | 3.04        | 1.05        | 0.36 ± 0.03 |
| 13C2090                     | 600 °C  | 6.026172 | 0.0033203 | 0.0454272 | 0.0000641 | 0.0043960 | 0.0000245 | 0.0497393 | 0.0011938 | 0.0188994 | 0.0000287 | 9.80860 ± 0.40272  | 27.34 ± 1.11  | 7.39        | 4.60        | 0.39 ± 0.02 |
| 13C2091                     | 700 °C  | 2.566072 | 0.0005546 | 0.0875398 | 0.0001024 | 0.0022418 | 0.0000360 | 0.0808431 | 0.0018102 | 0.0065808 | 0.0000242 | 7.17457 ± 0.16507  | 20.04 ± 0.46  | 24.46       | 8.86        | 0.47 ± 0.02 |
| 13C2093                     | 800 °C  | 1.955043 | 0.0008442 | 0.1742086 | 0.0000835 | 0.0025469 | 0.0000295 | 0.1239432 | 0.0027795 | 0.0024774 | 0.0000156 | 7.07807 ± 0.05442  | 19.77 ± 0.15  | 63.04       | 17.64       | 0.60 ± 0.03 |
| 13C2094                     | 900 °C  | 1.702561 | 0.0009756 | 0.2074271 | 0.0002184 | 0.0027514 | 0.0000245 | 0.1160810 | 0.0026194 | 0.0008460 | 0.0000199 | 7.04809 ± 0.05943  | 19.69 ± 0.17  | 85.84       | 21.01       | 0.77 ± 0.03 |
| 13C2096                     | 1050 °C | 2.041394 | 0.0006073 | 0.2754125 | 0.0001439 | 0.0038283 | 0.0000267 | 0.1311458 | 0.0029423 | 0.0004072 | 0.0000170 | 7.01373 ± 0.03742  | 19.59 ± 0.10  | 94.59       | 27.89       | 0.90 ± 0.04 |
| 13C2097                     | 1250 °C | 1.128703 | 0.0004959 | 0.1551967 | 0.0001015 | 0.0023176 | 0.0000211 | 0.1168199 | 0.0026206 | 0.0001639 | 0.0000184 | 7.02205 ± 0.07116  | 19.61 ± 0.20  | 96.50       | 15.72       | 0.57 ± 0.03 |
| 13C2099                     | 1400 °C | 0.242813 | 0.0003096 | 0.0319161 | 0.0001007 | 0.0005165 | 0.0000301 | 0.0311212 | 0.0007477 | 0.0000610 | 0.0000186 | 7.12302 ± 0.34860  | 19.89 ± 0.97  | 93.57       | 3.23        | 0.44 ± 0.02 |

|   |           |           |           |           |           |           |           |           |           |           |  |  |  |  |  |  |
|---|-----------|-----------|-----------|-----------|-----------|-----------|-----------|-----------|-----------|-----------|--|--|--|--|--|--|
| Σ | 20.850828 | 0.0051748 | 0.9874671 | 0.0003365 | 0.0221025 | 0.0000845 | 0.6621651 | 0.0059666 | 0.0464622 | 0.0000664 |  |  |  |  |  |  |
|---|-----------|-----------|-----------|-----------|-----------|-----------|-----------|-----------|-----------|-----------|--|--|--|--|--|--|

| Information on Analysis and Constants Used in Calculations |  |
|------------------------------------------------------------|--|
| Sample = 205-1                                             |  |
| Material = Groundmass                                      |  |
| Location = Kerguelen Plateau                               |  |
| Analyst = Kyle Krawl                                       |  |
| Project = KERGUELEN                                        |  |
| Mass Discrimination Law = LIN                              |  |
| Irradiation = OSU2C13                                      |  |
| J = 0.00155670 ± 0.00000405                                |  |
| FCT-3 = 28.201 ± 0.023 Ma                                  |  |
| IGSN = Undefined                                           |  |
| Preferred Age = Undefined                                  |  |
| Classification = Undefined                                 |  |
| Experiment Type = Undefined                                |  |
| Extraction Method = Undefined                              |  |
| Heating = 0 sec                                            |  |
| Isolation = 15.00 min                                      |  |
| Instrument = MAP215-50                                     |  |
| Lithology = Undefined                                      |  |
| Lat-Lon = Undefined - Undefined                            |  |
| R1 ratio = Undefined                                       |  |
| R2 ratio = Undefined                                       |  |
| R3 ratio = Undefined                                       |  |
| R4 ratio = Undefined                                       |  |
| R5 ratio = Undefined                                       |  |
| Collector Calibrations =                                   |  |

| Results                           | 40(a)/36(a) ± 2σ         | 40(r)/39(k) ± 2σ             | Age ± 2σ<br>(Ma)        | MSWD         | 39Ar(k)<br>(%,n)     | K/Ca ± 2σ   |
|-----------------------------------|--------------------------|------------------------------|-------------------------|--------------|----------------------|-------------|
| Age Plateau<br>Recalibrated       |                          | 7.03902 ± 0.03008<br>± 0.43% | 19.66 ± 0.13<br>± 0.67% | 1.43<br>21%  | 94.35<br>6           | 0.56 ± 0.12 |
|                                   |                          | Full External Error ± 0.46   |                         | 2.26         | 2σ Confidence Limit  |             |
|                                   |                          | Analytical Error ± 0.08      |                         | 1.1947       | Error Magnification  |             |
| Total Fusion Age<br>Recalibrated  |                          | 7.26634 ± 0.04143<br>± 0.57% | 20.29 ± 0.16<br>± 0.77% |              | 8                    | 0.64 ± 0.01 |
|                                   |                          | Full External Error ± 0.48   |                         |              |                      |             |
|                                   |                          | Analytical Error ± 0.12      |                         |              |                      |             |
| Normal Isochron<br>No Convergence | 298.00 ± 2.15<br>± 0.72% | 7.02292 ± 0.02825<br>± 0.40% | 19.62 ± 0.13<br>± 0.65% | 0.42<br>80%  | 94.35<br>6           |             |
|                                   |                          | Full External Error ± 0.46   |                         | 2.41         | 2σ Confidence Limit  |             |
|                                   |                          | Analytical Error ± 0.08      |                         | 1.0000       | Error Magnification  |             |
|                                   |                          |                              |                         | 500          | Number of Iterations |             |
|                                   |                          |                              |                         | 0.0000010496 | Convergence          |             |
| Inverse Isochron<br>Recalibrated  | 297.99 ± 2.16<br>± 0.72% | 7.02364 ± 0.02867<br>± 0.41% | 19.62 ± 0.13<br>± 0.66% | 0.43<br>79%  | 94.35<br>6           |             |
|                                   |                          | Full External Error ± 0.46   |                         | 2.41         | 2σ Confidence Limit  |             |
|                                   |                          | Analytical Error ± 0.08      |                         | 1.0000       | Error Magnification  |             |
|                                   |                          |                              |                         | 3            | Number of Iterations |             |
|                                   |                          |                              |                         | 0.0000002297 | Convergence          |             |
|                                   |                          |                              |                         | 73%          | Spreading Factor     |             |



| OSU Argon Geochronology Lab |         |                |             |                |           |                 |           |                 |           |                 |           |                |           |                |           |                |           |                 |           |                 |           |                |           |                 |           |                |           |                |           |                |           |                |           |      |
|-----------------------------|---------|----------------|-------------|----------------|-----------|-----------------|-----------|-----------------|-----------|-----------------|-----------|----------------|-----------|----------------|-----------|----------------|-----------|-----------------|-----------|-----------------|-----------|----------------|-----------|-----------------|-----------|----------------|-----------|----------------|-----------|----------------|-----------|----------------|-----------|------|
| Degassing<br>Patterns       |         | 36Ar(a)<br>[V] | %1σ         | 36Ar(c)<br>[V] | %1σ       | 36Ar(ca)<br>[V] | %1σ       | 36Ar(cl)<br>[V] | %1σ       | 37Ar(ca)<br>[V] | %1σ       | 38Ar(a)<br>[V] | %1σ       | 38Ar(c)<br>[V] | %1σ       | 38Ar(k)<br>[V] | %1σ       | 38Ar(ca)<br>[V] | %1σ       | 38Ar(cl)<br>[V] | %1σ       | 39Ar(k)<br>[V] | %1σ       | 39Ar(ca)<br>[V] | %1σ       | 40Ar(r)<br>[V] | %1σ       | 40Ar(a)<br>[V] | %1σ       | 40Ar(c)<br>[V] | %1σ       | 40Ar(k)<br>[V] | %1σ       |      |
|                             | 13C2088 | 500 °C         | 0.0170231   | 0.22           | 0.0000000 | 0.00            | 0.0000033 | 3.82            | 0.0000000 | 21.32           | 0.0124717 | 3.82           | 0.0031816 | 0.22           | 0.0000000 | 0.00           | 0.0001176 | 0.51            | 0.0000017 | 3.82            | 0.0002031 | 21.99          | 0.0103306 | 0.51            | 0.0000084 | 3.82           | 0.1577466 | 7.33           | 5.030313  | 0.22           | 0.0000000 | 0.00           | 0.0000104 | 0.51 |
|                             | 13C2090 | 600 °C         | 0.0188862   | 0.15           | 0.0000000 | 0.00            | 0.0000131 | 2.40            | 0.0000001 | 9.10            | 0.0497393 | 2.40           | 0.0035298 | 0.15           | 0.0000000 | 0.00           | 0.0005166 | 0.14            | 0.0000069 | 2.40            | 0.0003427 | 10.57          | 0.0453937 | 0.14            | 0.0000335 | 2.40           | 0.4452493 | 2.05           | 5.580877  | 0.15           | 0.0000000 | 0.00           | 0.0000458 | 0.14 |
|                             | 13C2091 | 700 °C         | ✓ 0.0065594 | 0.37           | 0.0000000 | 0.00            | 0.0000213 | 2.24            | 0.0000000 | 401.70          | 0.0808431 | 2.24           | 0.0012260 | 0.37           | 0.0000000 | 0.00           | 0.0009956 | 0.12            | 0.0000112 | 2.24            | 0.0000090 | 401.73         | 0.0874854 | 0.12            | 0.0000544 | 2.24           | 0.6276700 | 1.14           | 1.938313  | 0.37           | 0.0000000 | 0.00           | 0.0000884 | 0.12 |
|                             | 13C2093 | 800 °C         | ✓ 0.0024447 | 0.64           | 0.0000000 | 0.00            | 0.0000327 | 2.24            | 0.0000000 | 33.01           | 0.1239432 | 2.24           | 0.0004569 | 0.64           | 0.0000000 | 0.00           | 0.0019815 | 0.05            | 0.0000172 | 2.24            | 0.0000912 | 33.44          | 0.1741252 | 0.05            | 0.0000834 | 2.24           | 1.2324706 | 0.38           | 0.722396  | 0.64           | 0.0000000 | 0.00           | 0.0001759 | 0.05 |
|                             | 13C2094 | 900 °C         | ✓ 0.0008154 | 2.44           | 0.0000000 | 0.00            | 0.0000306 | 2.26            | 0.0000000 | 12.40           | 0.1160810 | 2.26           | 0.0001524 | 2.44           | 0.0000000 | 0.00           | 0.0023596 | 0.11            | 0.0000161 | 2.26            | 0.0002233 | 13.52          | 0.2073490 | 0.11            | 0.0000781 | 2.26           | 1.4614139 | 0.41           | 0.240938  | 2.44           | 0.0000000 | 0.00           | 0.0002094 | 0.11 |
|                             | 13C2096 | 1050 °C        | ✓ 0.0003725 | 4.56           | 0.0000000 | 0.00            | 0.0000346 | 2.24            | 0.0000001 | 6.97            | 0.1311458 | 2.24           | 0.0000696 | 4.56           | 0.0000000 | 0.00           | 0.0031332 | 0.05            | 0.0000182 | 2.24            | 0.0006073 | 8.81           | 0.2753243 | 0.05            | 0.0000883 | 2.24           | 1.9310503 | 0.26           | 0.110066  | 4.56           | 0.0000000 | 0.00           | 0.0002781 | 0.05 |
|                             | 13C2097 | 1250 °C        | ✓ 0.0001330 | 13.87          | 0.0000000 | 0.00            | 0.0000308 | 2.24            | 0.0000001 | 6.82            | 0.1168199 | 2.24           | 0.0000249 | 13.87          | 0.0000000 | 0.00           | 0.0017652 | 0.07            | 0.0000162 | 2.24            | 0.0005113 | 8.69           | 0.1551181 | 0.07            | 0.0000786 | 2.24           | 1.0892475 | 0.50           | 0.039299  | 13.87          | 0.0000000 | 0.00           | 0.0001567 | 0.07 |
|                             | 13C2099 | 1400 °C        | ✓ 0.0000528 | 35.30          | 0.0000000 | 0.00            | 0.0000082 | 2.40            | 0.0000000 | 22.41           | 0.0311212 | 2.40           | 0.0000099 | 35.30          | 0.0000000 | 0.00           | 0.0003630 | 0.32            | 0.0000043 | 2.40            | 0.0001393 | 23.04          | 0.0318952 | 0.32            | 0.0000209 | 2.40           | 0.2271900 | 2.43           | 0.015591  | 35.30          | 0.0000000 | 0.00           | 0.0000322 | 0.32 |
|                             |         | Σ              | 0.0462869   | 0.14           | 0.0000000 | 0.00            | 0.0001748 | 0.90            | 0.0000005 | 4.66            | 0.6621651 | 0.90           | 0.0086510 | 0.14           | 0.0000000 | 0.00           | 0.0112323 | 0.03            | 0.0000920 | 0.90            | 0.0021272 | 5.22           | 0.9870214 | 0.03            | 0.0004456 | 0.90           | 7.1720383 | 0.28           | 13.677793 | 0.14           | 0.0000000 | 0.00           | 0.0009969 | 0.03 |
|                             | Σ       |                |             |                |           |                 |           | 0.0464622       | 0.14      | 0.6621651       | 0.90      |                |           |                |           |                |           |                 |           | 0.0221025       | 0.51      |                |           | 0.9874671       | 0.03      |                |           |                |           |                |           | 20.850828      | 0.14      |      |



| Additional Parameters |           | 40Ar/39Ar  | 1σ       | 37Ar/39Ar | 1σ       | 36Ar/39Ar | 1σ       | Time (days) | 37Ar (decay) | 39Ar (decay) | 40Ar (moles) |
|-----------------------|-----------|------------|----------|-----------|----------|-----------|----------|-------------|--------------|--------------|--------------|
| 13C2088               | 500 °C    | 501.798666 | 2.587136 | 1.206281  | 0.046516 | 1.646821  | 0.009149 | 111.650     | 9.095491     | 1.00078900   | 1.038E-12    |
| 13C2090               | 600 °C    | 132.655543 | 0.200978 | 1.094922  | 0.026324 | 0.416037  | 0.000863 | 111.686     | 9.101981     | 1.00078925   | 1.205E-12    |
| 13C2091               | 700 °C ✓  | 29.313204  | 0.034866 | 0.923501  | 0.020707 | 0.075175  | 0.000290 | 111.703     | 9.105102     | 1.00078937   | 5.132E-13    |
| 13C2093               | 800 °C ✓  | 11.222422  | 0.007241 | 0.711464  | 0.015959 | 0.014221  | 0.000090 | 111.738     | 9.111349     | 1.00078962   | 3.910E-13    |
| 13C2094               | 900 °C ✓  | 8.207995   | 0.009839 | 0.559623  | 0.012642 | 0.004079  | 0.000096 | 111.756     | 9.114474     | 1.00078974   | 3.405E-13    |
| 13C2096               | 1050 °C ✓ | 7.412133   | 0.004457 | 0.476179  | 0.010686 | 0.001479  | 0.000062 | 111.791     | 9.120852     | 1.00078999   | 4.083E-13    |
| 13C2097               | 1250 °C ✓ | 7.272725   | 0.005730 | 0.752722  | 0.016893 | 0.001056  | 0.000119 | 111.808     | 9.123981     | 1.00079011   | 2.257E-13    |
| 13C2099               | 1400 °C ✓ | 7.607853   | 0.025894 | 0.975093  | 0.023628 | 0.001911  | 0.000584 | 111.849     | 9.131242     | 1.00079040   | 4.856E-14    |



| Procedure<br>Blanks |         | 36Ar<br>[V] | 1σ        | 37Ar<br>[V] | 1σ        | 38Ar<br>[V] | 1σ        | 39Ar<br>[V] | 1σ        | 40Ar<br>[V] | 1σ        |
|---------------------|---------|-------------|-----------|-------------|-----------|-------------|-----------|-------------|-----------|-------------|-----------|
| 13C2088             | 500 °C  | 0.0002993   | 0.0000150 | 0.0000104   | 0.0000141 | 0.0000186   | 0.0000146 | 0.0000271   | 0.0000304 | 0.0029548   | 0.0002230 |
| 13C2090             | 600 °C  | 0.0002867   | 0.0000150 | 0.0000302   | 0.0000141 | 0.0000187   | 0.0000146 | 0.0000413   | 0.0000304 | 0.0036614   | 0.0002230 |
| 13C2091             | 700 °C  | 0.0002845   | 0.0000150 | 0.0000368   | 0.0000141 | 0.0000188   | 0.0000146 | 0.0000481   | 0.0000304 | 0.0036739   | 0.0002230 |
| 13C2093             | 800 °C  | 0.0002861   | 0.0000150 | 0.0000443   | 0.0000141 | 0.0000189   | 0.0000146 | 0.0000617   | 0.0000304 | 0.0034544   | 0.0002230 |
| 13C2094             | 900 °C  | 0.0002890   | 0.0000150 | 0.0000453   | 0.0000141 | 0.0000189   | 0.0000146 | 0.0000686   | 0.0000304 | 0.0033771   | 0.0002230 |
| 13C2096             | 1050 °C | 0.0002974   | 0.0000150 | 0.0000412   | 0.0000141 | 0.0000190   | 0.0000146 | 0.0000825   | 0.0000304 | 0.0036895   | 0.0002230 |
| 13C2097             | 1250 °C | 0.0003020   | 0.0000150 | 0.0000364   | 0.0000141 | 0.0000191   | 0.0000146 | 0.0000893   | 0.0000304 | 0.0042315   | 0.0002230 |
| 13C2099             | 1400 °C | 0.0003109   | 0.0000150 | 0.0000178   | 0.0000141 | 0.0000192   | 0.0000146 | 0.0001051   | 0.0000304 | 0.0070063   | 0.0002230 |



| OSU Argon Geochronology Lab |         |             |           |           |        |                 |           |           |        |             |           |           |        |             |           |           |        |             |           |           |        |             |
|-----------------------------|---------|-------------|-----------|-----------|--------|-----------------|-----------|-----------|--------|-------------|-----------|-----------|--------|-------------|-----------|-----------|--------|-------------|-----------|-----------|--------|-------------|
| Intercept<br>Values         |         | 36Ar<br>[V] | 1σ        | r2        |        | 37Ar<br>[V]     | 1σ        | r2        |        | 38Ar<br>[V] | 1σ        | r2        |        | 39Ar<br>[V] | 1σ        | r2        |        | 40Ar<br>[V] | 1σ        | r2        |        |             |
|                             | 13C2088 | 500 °C      | 0.0179838 | 0.0000355 | 0.9930 | LIN #           | 0.0014220 | 0.0000417 | 0.9613 | EXP #       | 0.0035935 | 0.0000395 | 0.3518 | LIN #       | 0.0104716 | 0.0000438 | 0.9999 | EXP #       | 5.2003854 | 0.0036150 | 0.9984 | EXP #       |
|                             | 13C2090 | 600 °C      | 0.0199205 | 0.0000258 | 0.9969 | LIN #           | 0.0056568 | 0.0000509 | 0.6862 | EXP #       | 0.0045046 | 0.0000203 | 0.4491 | LIN #       | 0.0459413 | 0.0000572 | 0.9998 | EXP #       | 6.0419176 | 0.0033194 | 0.9988 | EXP #       |
|                             | 13C2091 | 700 °C      | 0.0071200 | 0.0000202 | 0.9784 | LIN #           | 0.0091769 | 0.0000304 | 0.9730 | LIN #       | 0.0023060 | 0.0000337 | 0.1130 | LIN #       | 0.0884813 | 0.0000988 | 0.9674 | LIN # 2 3   | 2.5743796 | 0.0005087 | 0.9999 | EXP # 1     |
|                             | 13C2093 | 800 °C      | 0.0028600 | 0.0000060 | 0.9842 | EXP # 1 2 4 6 7 | 0.0140491 | 0.0000518 | 0.9883 | LIN # 1 4 5 | 0.0026176 | 0.0000264 | 0.6866 | LIN #       | 0.1760658 | 0.0000786 | 0.9998 | EXP # 2 8 9 | 1.9622255 | 0.0008158 | 0.9996 | EXP # 1 2   |
|                             | 13C2094 | 900 °C      | 0.0011685 | 0.0000142 | 0.8897 | LIN # 2 3 4 10  | 0.0131585 | 0.0000582 | 0.9750 | LIN #       | 0.0028266 | 0.0000203 | 0.8998 | LIN # 3     | 0.2096545 | 0.0002185 | 0.9987 | EXP # 5     | 1.7093567 | 0.0009517 | 0.9990 | EXP #       |
|                             | 13C2096 | 1050 °C     | 0.0007210 | 0.0000091 | 0.9888 | LIN # 2 5 6 8   | 0.0148444 | 0.0000549 | 0.9794 | LIN #       | 0.0039252 | 0.0000230 | 0.9313 | LIN #       | 0.2783334 | 0.0001421 | 0.9997 | EXP # 2     | 2.0489770 | 0.0005659 | 0.9998 | EXP # 2     |
|                             | 13C2097 | 1250 °C     | 0.0004728 | 0.0000118 | 0.9779 | EXP # 2 3 6 7   | 0.0132180 | 0.0000480 | 0.9845 | EXP #       | 0.0023838 | 0.0000158 | 0.8532 | LIN #       | 0.1568855 | 0.0000979 | 0.9994 | EXP #       | 1.1350913 | 0.0004438 | 0.9996 | EXP # 2 3 7 |
|                             | 13C2099 | 1400 °C     | 0.0003749 | 0.0000121 | 0.8120 | LIN # 3 8 9     | 0.0035270 | 0.0000297 | 0.9537 | EXP #       | 0.0005463 | 0.0000270 | 0.1509 | LIN #       | 0.0323536 | 0.0000971 | 0.9837 | EXP #       | 0.2503199 | 0.0002152 | 0.9963 | EXP # 2 3 8 |



| OSU Argon Geochronology Lab |         |         |        |            |                   |              |      |               |                  |       |                     |                    |     |            |       |               |     |        |       |              |                        |     |       |      |      |     |        |             |       |       |         |           |            |     |
|-----------------------------|---------|---------|--------|------------|-------------------|--------------|------|---------------|------------------|-------|---------------------|--------------------|-----|------------|-------|---------------|-----|--------|-------|--------------|------------------------|-----|-------|------|------|-----|--------|-------------|-------|-------|---------|-----------|------------|-----|
| Sample Parameters           |         |         | Sample | Material   | Location          | Analyst      | Temp | Standard Name | Standard (in Ma) | %1σ   | Standard Reference  | Standard 40Ar/39Ar | %1σ | J          | %1σ   | Air 40Ar/36Ar | %1σ | MDF    | %1σ   | Volume Ratio | Sensitivity (mol/volt) | Day | Month | Year | Hour | Min | Resist | Irradiation | X-pos | Y-pos | Z/H-pos | Project   | Experiment | Nmb |
|                             | 13C2088 | 500 °C  | 205-1  | Groundmass | Kerguelen Plateau | Kyle Krawl   | 500  | FCT-3         | 28.201           | 0.083 | Kuiper et al., 2008 |                    |     | 0.00155670 | 0.260 |               |     | 1.0092 | 0.001 | 0.9982       | 2E-13                  | 26  | JUL   | 2013 | 7    | 37  | 1      | OSU2C13     | 0.00  | 0.00  | 44.30   | Kerguelen | 13C2088    | 01  |
|                             | 13C2090 | 600 °C  | 205-1  | Groundmass | Kerguelen Plateau | Kyle Krawl   | 600  | FCT-3         | 28.201           | 0.083 | Kuiper et al., 2008 |                    |     | 0.00155670 | 0.260 |               |     | 1.0092 | 0.001 | 0.998        | 2E-13                  | 26  | JUL   | 2013 | 8    | 29  | 1      | OSU2C13     | 0.00  | 0.00  | 44.30   | Kerguelen | 13C2088    | 01  |
|                             | 13C2091 | 700 °C  | 205-1  | Groundmass | Kerguelen Plateau | Trevor Smith | 700  | FCT-3         | 28.201           | 0.083 | Kuiper et al., 2008 |                    |     | 0.00155670 | 0.260 |               |     | 1.0092 | 0.001 | 0.9982       | 2E-13                  | 26  | JUL   | 2013 | 8    | 54  | 1      | OSU2C13     | 0.00  | 0.00  | 44.30   | Kerguelen | 13C2088    | 01  |
|                             | 13C2093 | 800 °C  | 205-1  | Groundmass | Kerguelen Plateau | Trevor Smith | 800  | FCT-3         | 28.201           | 0.083 | Kuiper et al., 2008 |                    |     | 0.00155670 | 0.260 |               |     | 1.0092 | 0.001 | 0.9981       | 2E-13                  | 26  | JUL   | 2013 | 9    | 44  | 1      | OSU2C13     | 0.00  | 0.00  | 44.30   | Kerguelen | 13C2088    | 01  |
|                             | 13C2094 | 900 °C  | 205-1  | Groundmass | Kerguelen Plateau | Trevor Smith | 900  | FCT-3         | 28.201           | 0.083 | Kuiper et al., 2008 |                    |     | 0.00155670 | 0.260 |               |     | 1.0092 | 0.001 | 0.998        | 2E-13                  | 26  | JUL   | 2013 | 10   | 9   | 1      | OSU2C13     | 0.00  | 0.00  | 44.30   | Kerguelen | 13C2088    | 01  |
|                             | 13C2096 | 1050 °C | 205-1  | Groundmass | Kerguelen Plateau | Trevor Smith | 1050 | FCT-3         | 28.201           | 0.083 | Kuiper et al., 2008 |                    |     | 0.00155670 | 0.260 |               |     | 1.0092 | 0.001 | 0.9981       | 2E-13                  | 26  | JUL   | 2013 | 11   | 0   | 1      | OSU2C13     | 0.00  | 0.00  | 44.30   | Kerguelen | 13C2088    | 01  |
|                             | 13C2097 | 1250 °C | 205-1  | Groundmass | Kerguelen Plateau | Trevor Smith | 1250 | FCT-3         | 28.201           | 0.083 | Kuiper et al., 2008 |                    |     | 0.00155670 | 0.260 |               |     | 1.0092 | 0.001 | 0.9981       | 2E-13                  | 26  | JUL   | 2013 | 11   | 25  | 1      | OSU2C13     | 0.00  | 0.00  | 44.30   | Kerguelen | 13C2088    | 01  |
|                             | 13C2099 | 1400 °C | 205-1  | Groundmass | Kerguelen Plateau | Trevor Smith | 1400 | FCT-3         | 28.201           | 0.083 | Kuiper et al., 2008 |                    |     | 0.00155670 | 0.260 |               |     | 1.0092 | 0.001 | 0.998        | 2E-13                  | 26  | JUL   | 2013 | 12   | 23  | 1      | OSU2C13     | 0.00  | 0.00  | 44.30   | Kerguelen | 13C2088    | 01  |



| Irradiation Constants |         | OSU Argon Geochronology Lab |     |          |     |          |     |          |     |           |     |           |     |           |     |          |     |          |     |           |     |      |     |      |     |       |     |  |
|-----------------------|---------|-----------------------------|-----|----------|-----|----------|-----|----------|-----|-----------|-----|-----------|-----|-----------|-----|----------|-----|----------|-----|-----------|-----|------|-----|------|-----|-------|-----|--|
|                       |         | 40/36(a)                    | %1σ | 40/36(c) | %1σ | 38/36(a) | %1σ | 38/36(c) | %1σ | 39/37(ca) | %1σ | 38/37(ca) | %1σ | 36/37(ca) | %1σ | 40/39(k) | %1σ | 38/39(k) | %1σ | 36/38(cl) | %1σ | K/Ca | %1σ | K/Cl | %1σ | Ca/Cl | %1σ |  |
| 13C2088               | 500 °C  | 295.5                       | 0   | 0.018    | 35  | 0.1869   | 0   | 1.493    | 3   | 0.000673  | 0   | 0.000139  | 0   | 0.000264  | 0   | 0.00101  | 0   | 0.01138  | 0   | 0         | 0   | 0.43 | 0   | 0    | 0   | 0     | 0   |  |
| 13C2090               | 600 °C  | 295.5                       | 0   | 0.018    | 35  | 0.1869   | 0   | 1.493    | 3   | 0.000673  | 0   | 0.000139  | 0   | 0.000264  | 0   | 0.00101  | 0   | 0.01138  | 0   | 0         | 0   | 0.43 | 0   | 0    | 0   | 0     | 0   |  |
| 13C2091               | 700 °C  | 295.5                       | 0   | 0.018    | 35  | 0.1869   | 0   | 1.493    | 3   | 0.000673  | 0   | 0.000139  | 0   | 0.000264  | 0   | 0.00101  | 0   | 0.01138  | 0   | 0         | 0   | 0.43 | 0   | 0    | 0   | 0     | 0   |  |
| 13C2093               | 800 °C  | 295.5                       | 0   | 0.018    | 35  | 0.1869   | 0   | 1.493    | 3   | 0.000673  | 0   | 0.000139  | 0   | 0.000264  | 0   | 0.00101  | 0   | 0.01138  | 0   | 0         | 0   | 0.43 | 0   | 0    | 0   | 0     | 0   |  |
| 13C2094               | 900 °C  | 295.5                       | 0   | 0.018    | 35  | 0.1869   | 0   | 1.493    | 3   | 0.000673  | 0   | 0.000139  | 0   | 0.000264  | 0   | 0.00101  | 0   | 0.01138  | 0   | 0         | 0   | 0.43 | 0   | 0    | 0   | 0     | 0   |  |
| 13C2096               | 1050 °C | 295.5                       | 0   | 0.018    | 35  | 0.1869   | 0   | 1.493    | 3   | 0.000673  | 0   | 0.000139  | 0   | 0.000264  | 0   | 0.00101  | 0   | 0.01138  | 0   | 0         | 0   | 0.43 | 0   | 0    | 0   | 0     | 0   |  |
| 13C2097               | 1250 °C | 295.5                       | 0   | 0.018    | 35  | 0.1869   | 0   | 1.493    | 3   | 0.000673  | 0   | 0.000139  | 0   | 0.000264  | 0   | 0.00101  | 0   | 0.01138  | 0   | 0         | 0   | 0.43 | 0   | 0    | 0   | 0     | 0   |  |
| 13C2099               | 1400 °C | 295.5                       | 0   | 0.018    | 35  | 0.1869   | 0   | 1.493    | 3   | 0.000673  | 0   | 0.000139  | 0   | 0.000264  | 0   | 0.00101  | 0   | 0.01138  | 0   | 0         | 0   | 0.43 | 0   | 0    | 0   | 0     | 0   |  |



13C2088.AGE >>> 205-1 >>> KERGUELEN PROJECT

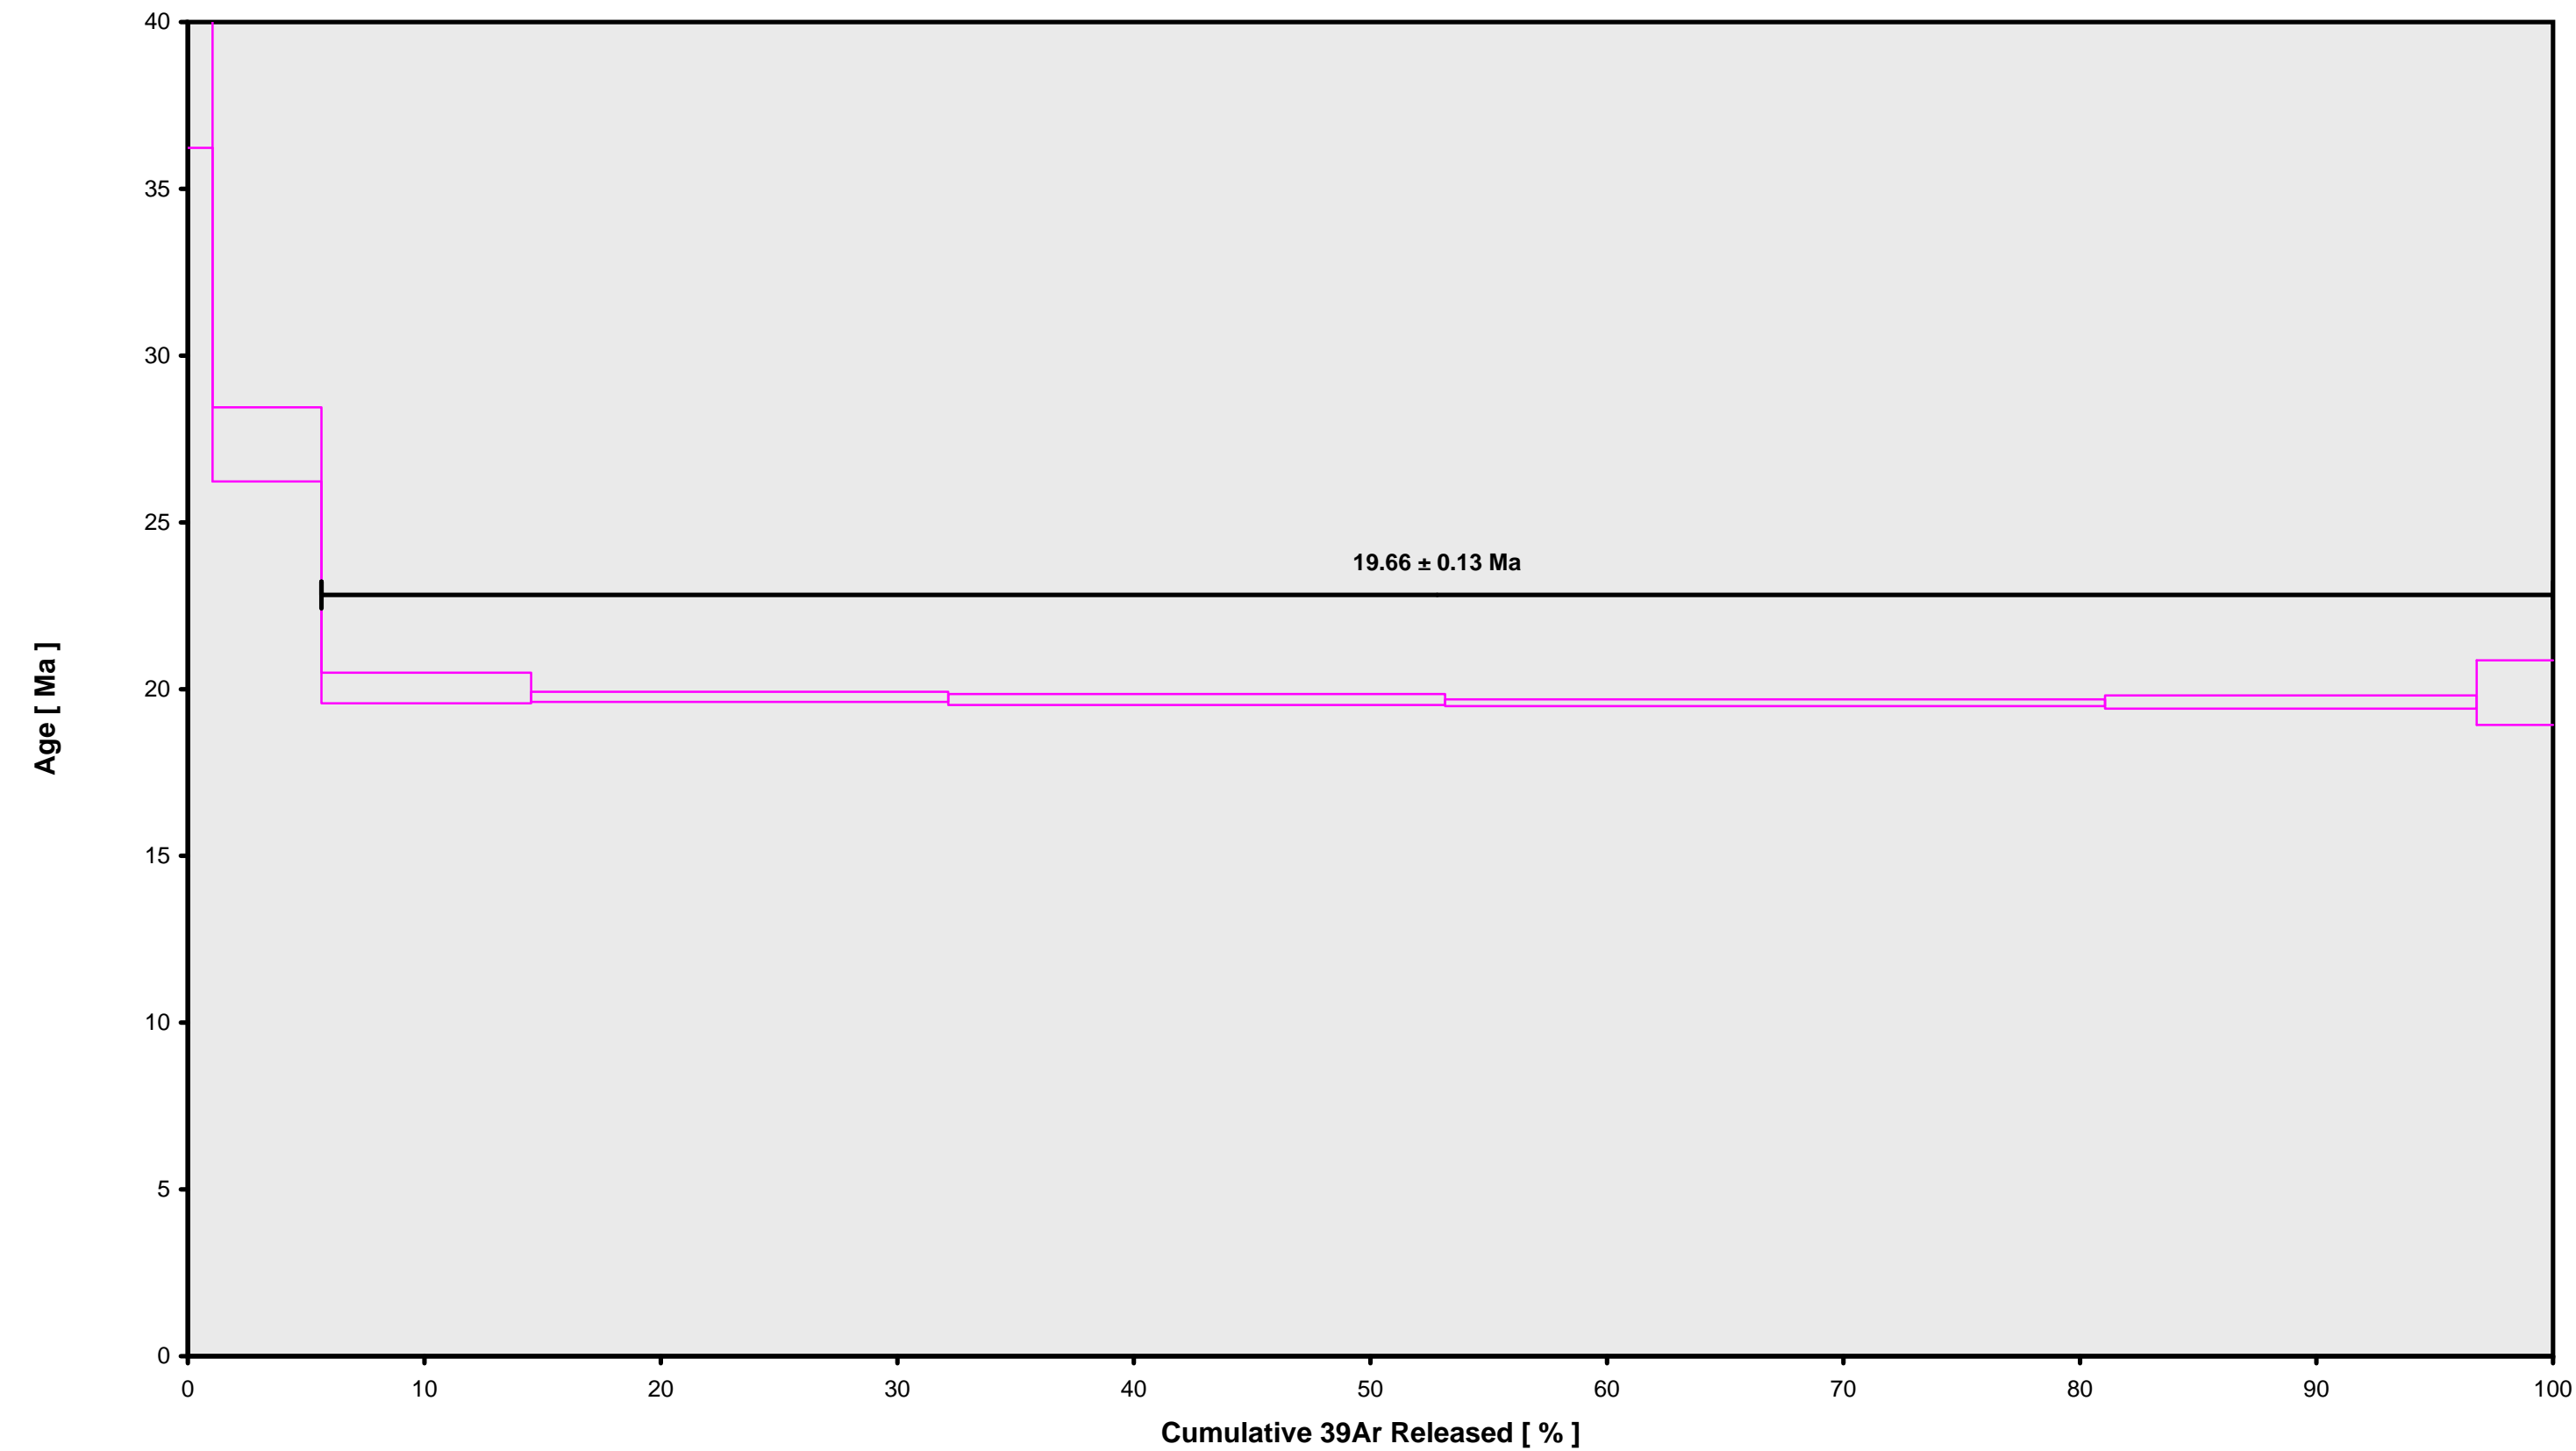

Ar-Ages in Ma

WEIGHTED PLATEAU

$19.66 \pm 0.13$

TOTAL FUSION

$20.29 \pm 0.16$

NORMAL ISOCHRON

$19.62 \pm 0.13$

INVERSE ISOCHRON

$19.62 \pm 0.13$

MSWD (PROBABILITY)

1.43 (21%)

Sample Info

Groundmass

Kerguelen Plateau

Kyle Krawl

IRR = OSU2C13

J =  $0.00155670 \pm 0.00000405$

RECALIBRATED AGE



13C2088.AGE >>> 205-1 >>> KERGUELEN PROJECT

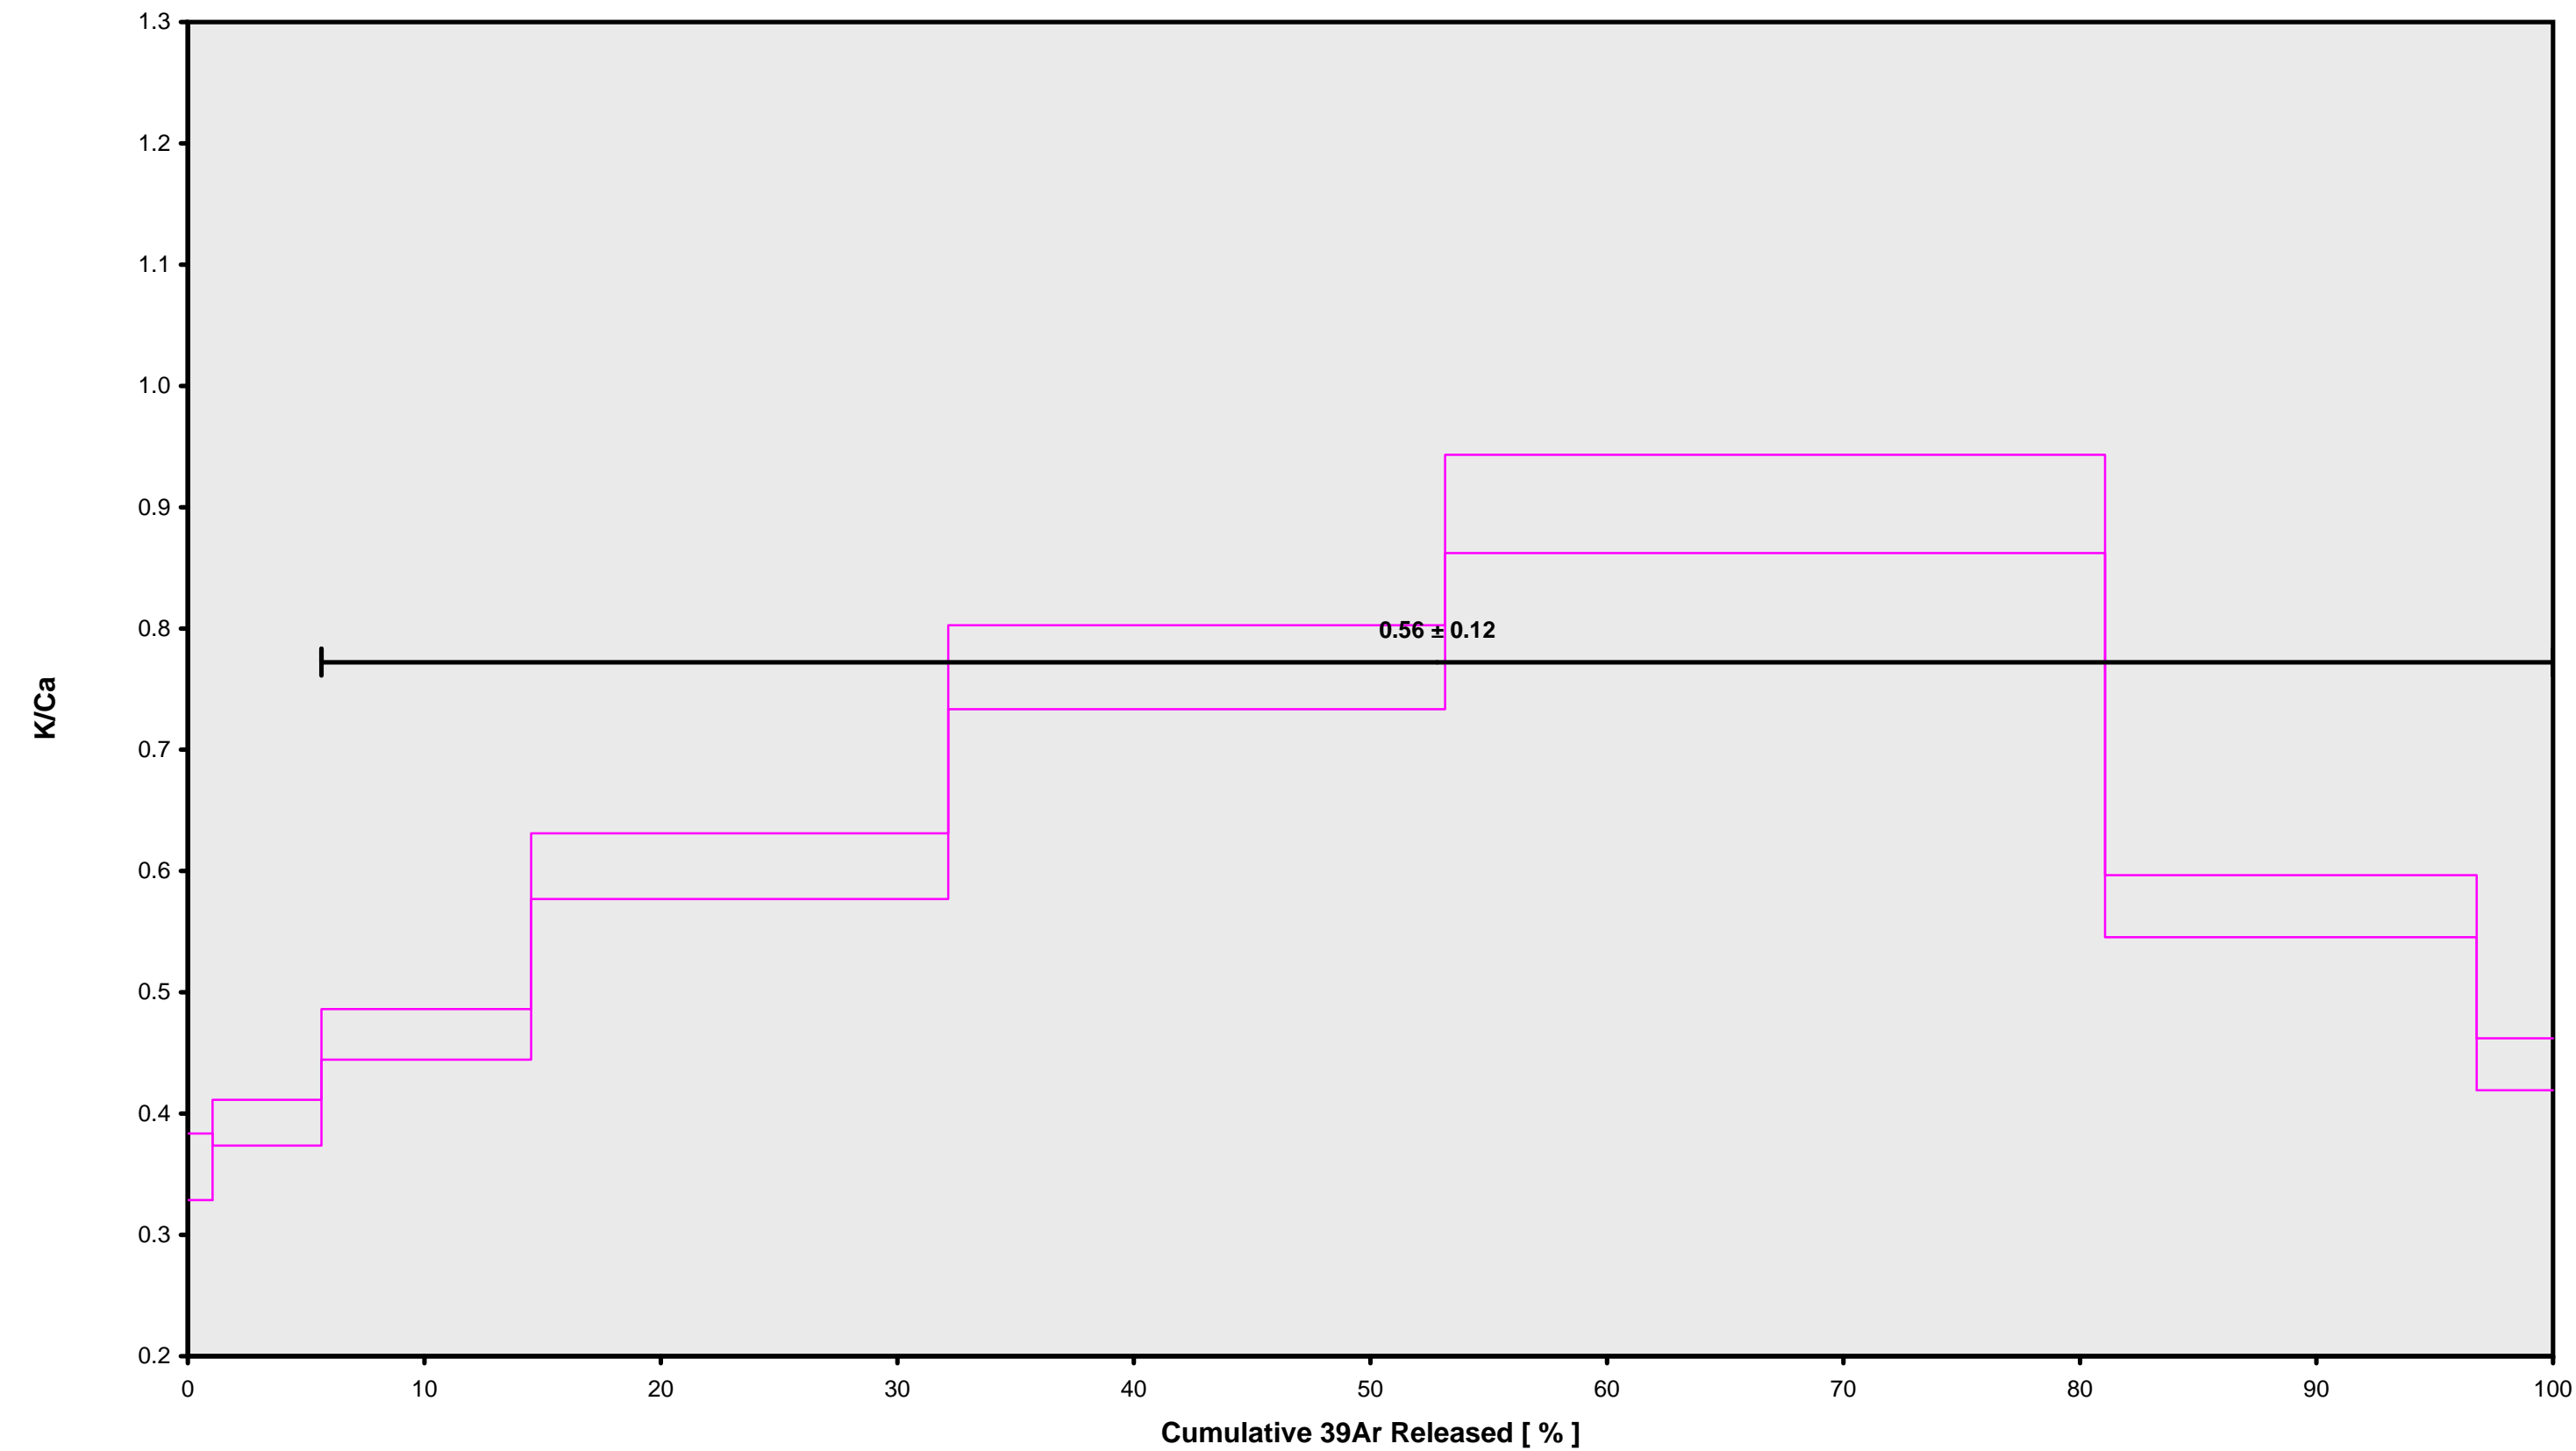

**Ar-Ages in Ma**

**WEIGHTED PLATEAU**  
 $19.66 \pm 0.13$

**TOTAL FUSION**  
 $20.29 \pm 0.16$

**NORMAL ISOCHRON**  
 $19.62 \pm 0.13$

**INVERSE ISOCHRON**  
 $19.62 \pm 0.13$

**Sample Info**

Groundmass  
Kerguelen Plateau  
Kyle Krawl

IRR = OSU2C13  
J =  $0.00155670 \pm 0.00000405$

**RECALIBRATED AGE**



13C2088.AGE >>> 205-1 >>> KERGUELEN PROJECT

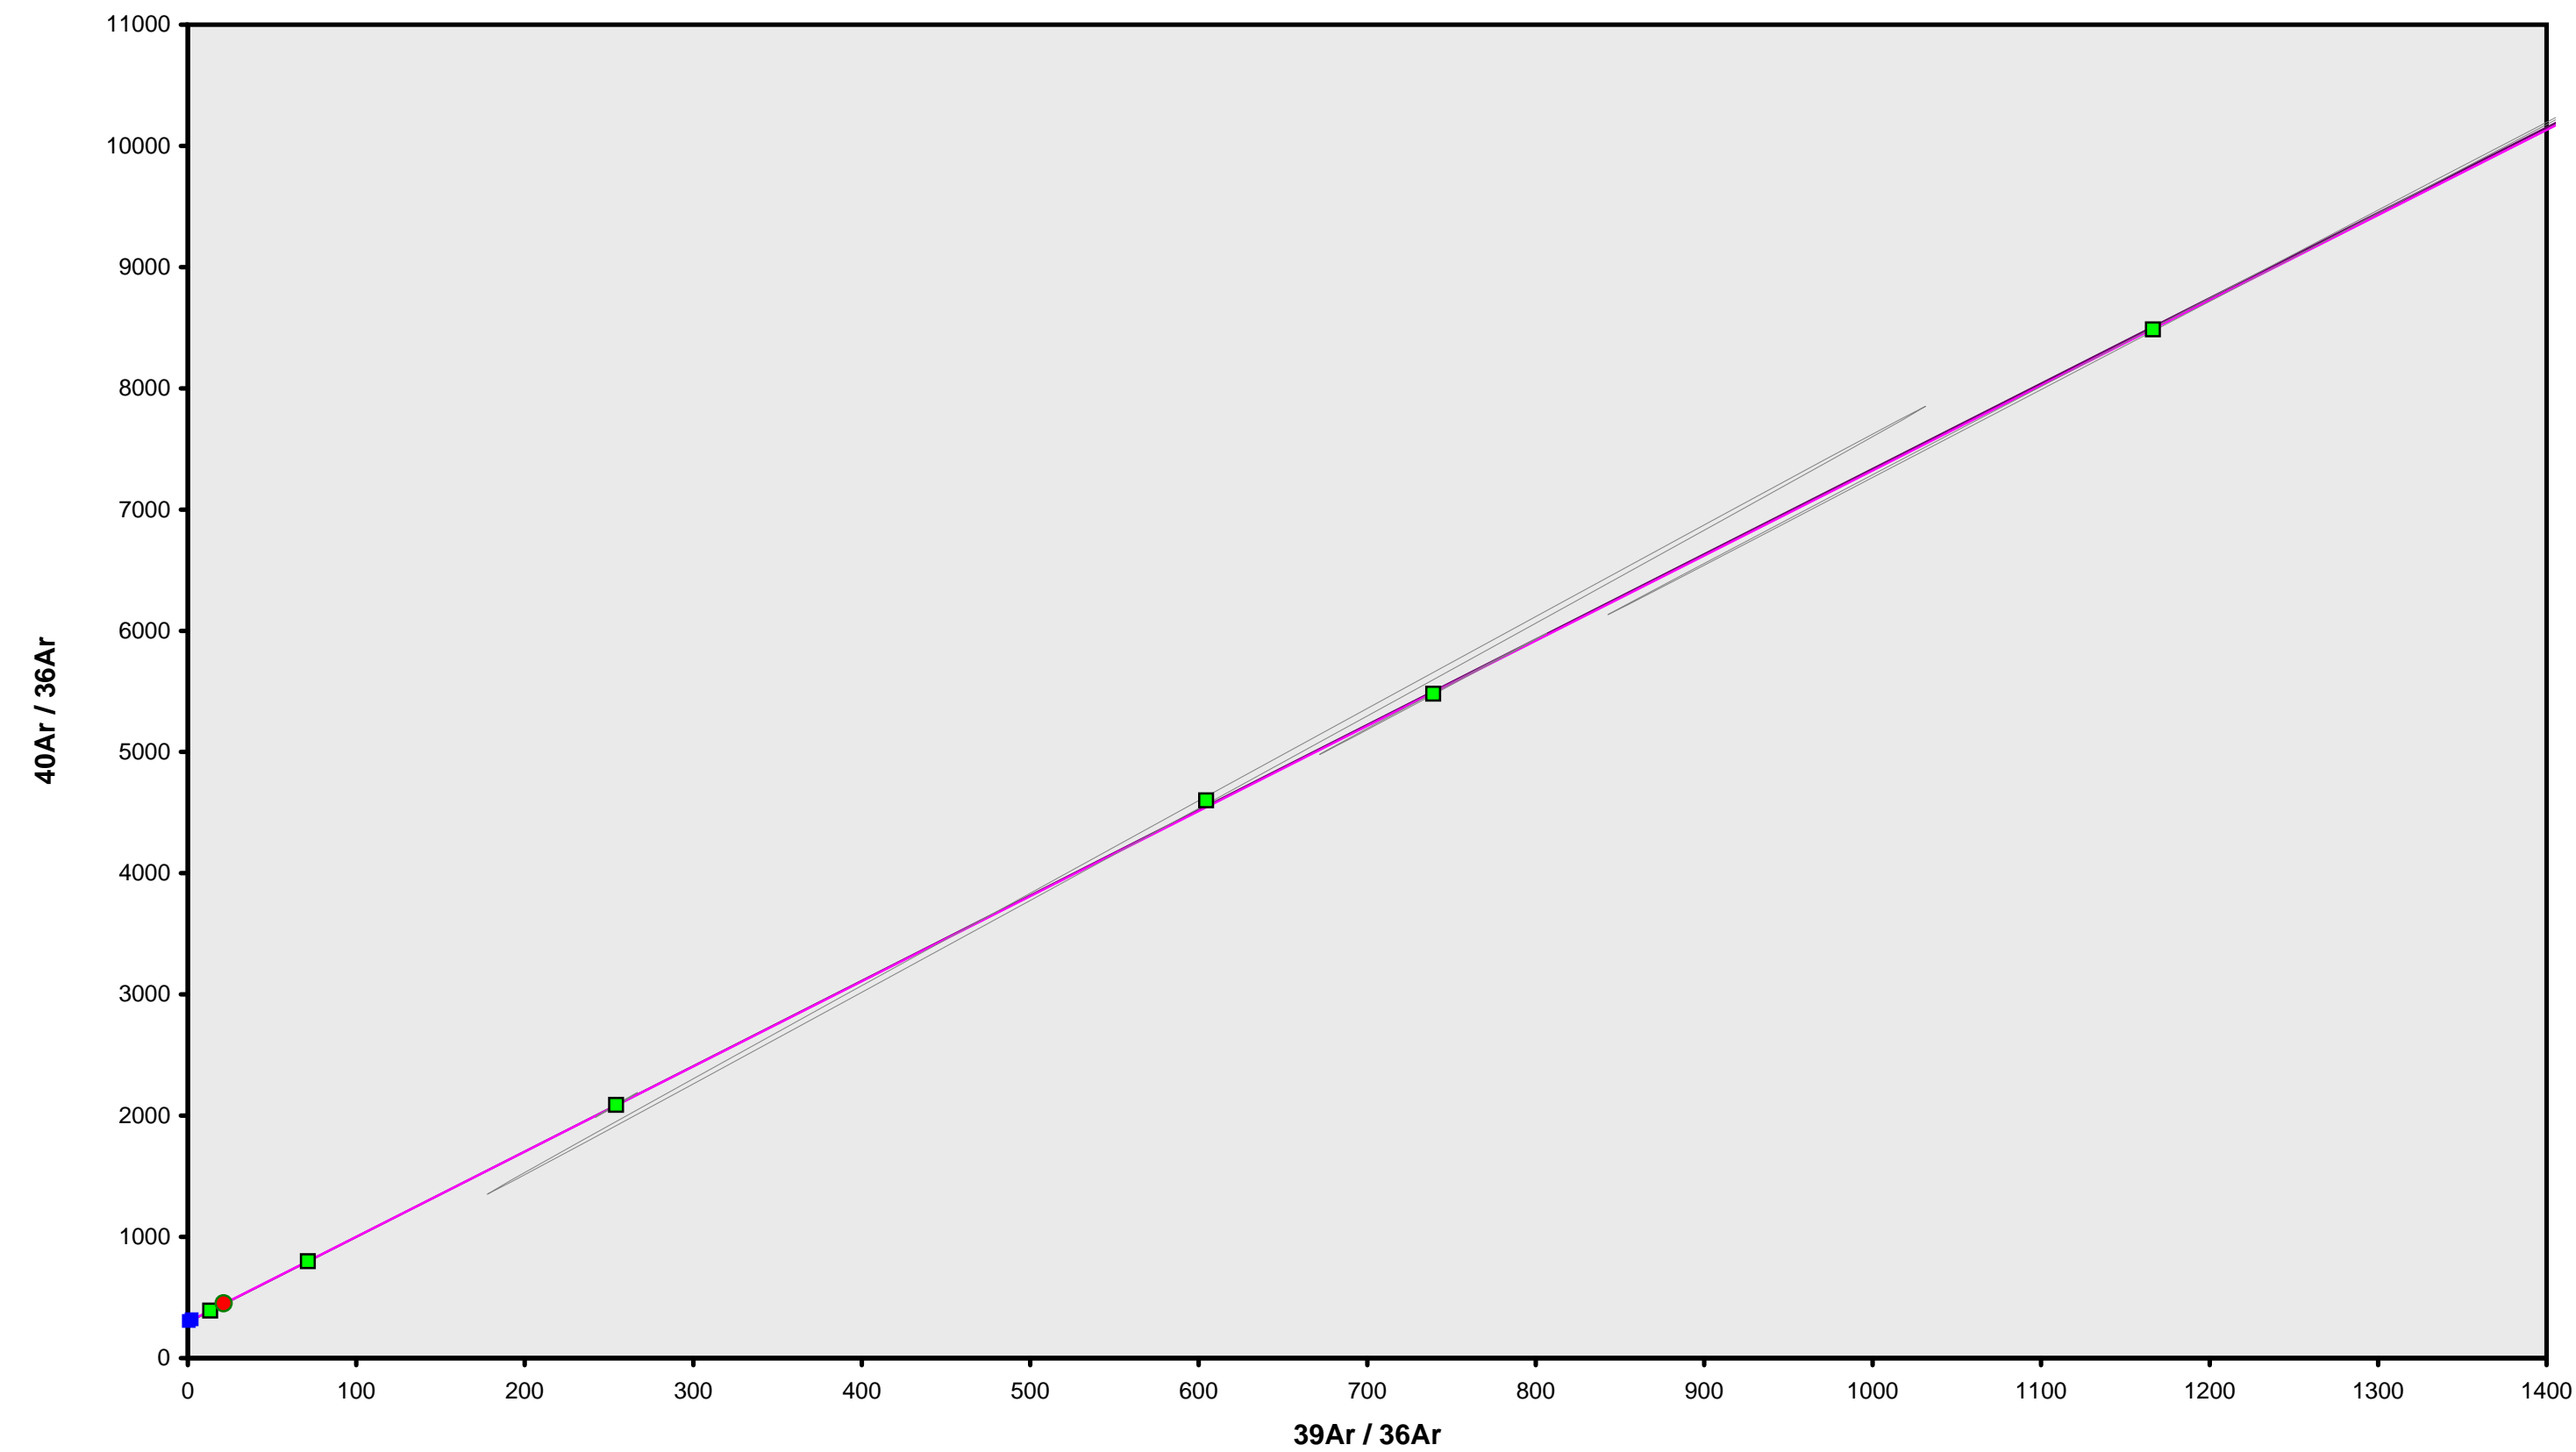

**Ar-Ages in Ma**

**WEIGHTED PLATEAU**  
19.66 ± 0.13

**TOTAL FUSION**  
20.29 ± 0.16

**NORMAL ISOCHRON**  
19.62 ± 0.13

**INVERSE ISOCHRON**  
19.62 ± 0.13

**MSWD (PROBABILITY)**  
0.42 (80%)

**40AR/36AR INTERCEPT**  
298.0 ± 2.2

**Sample Info**

Groundmass  
Kerguelen Plateau  
Kyle Krawl

IRR = OSU2C13  
J = 0.00155670 ± 0.00000405

**RECALIBRATED AGE**



13C2088.AGE >>> 205-1 >>> KERGUELEN PROJECT

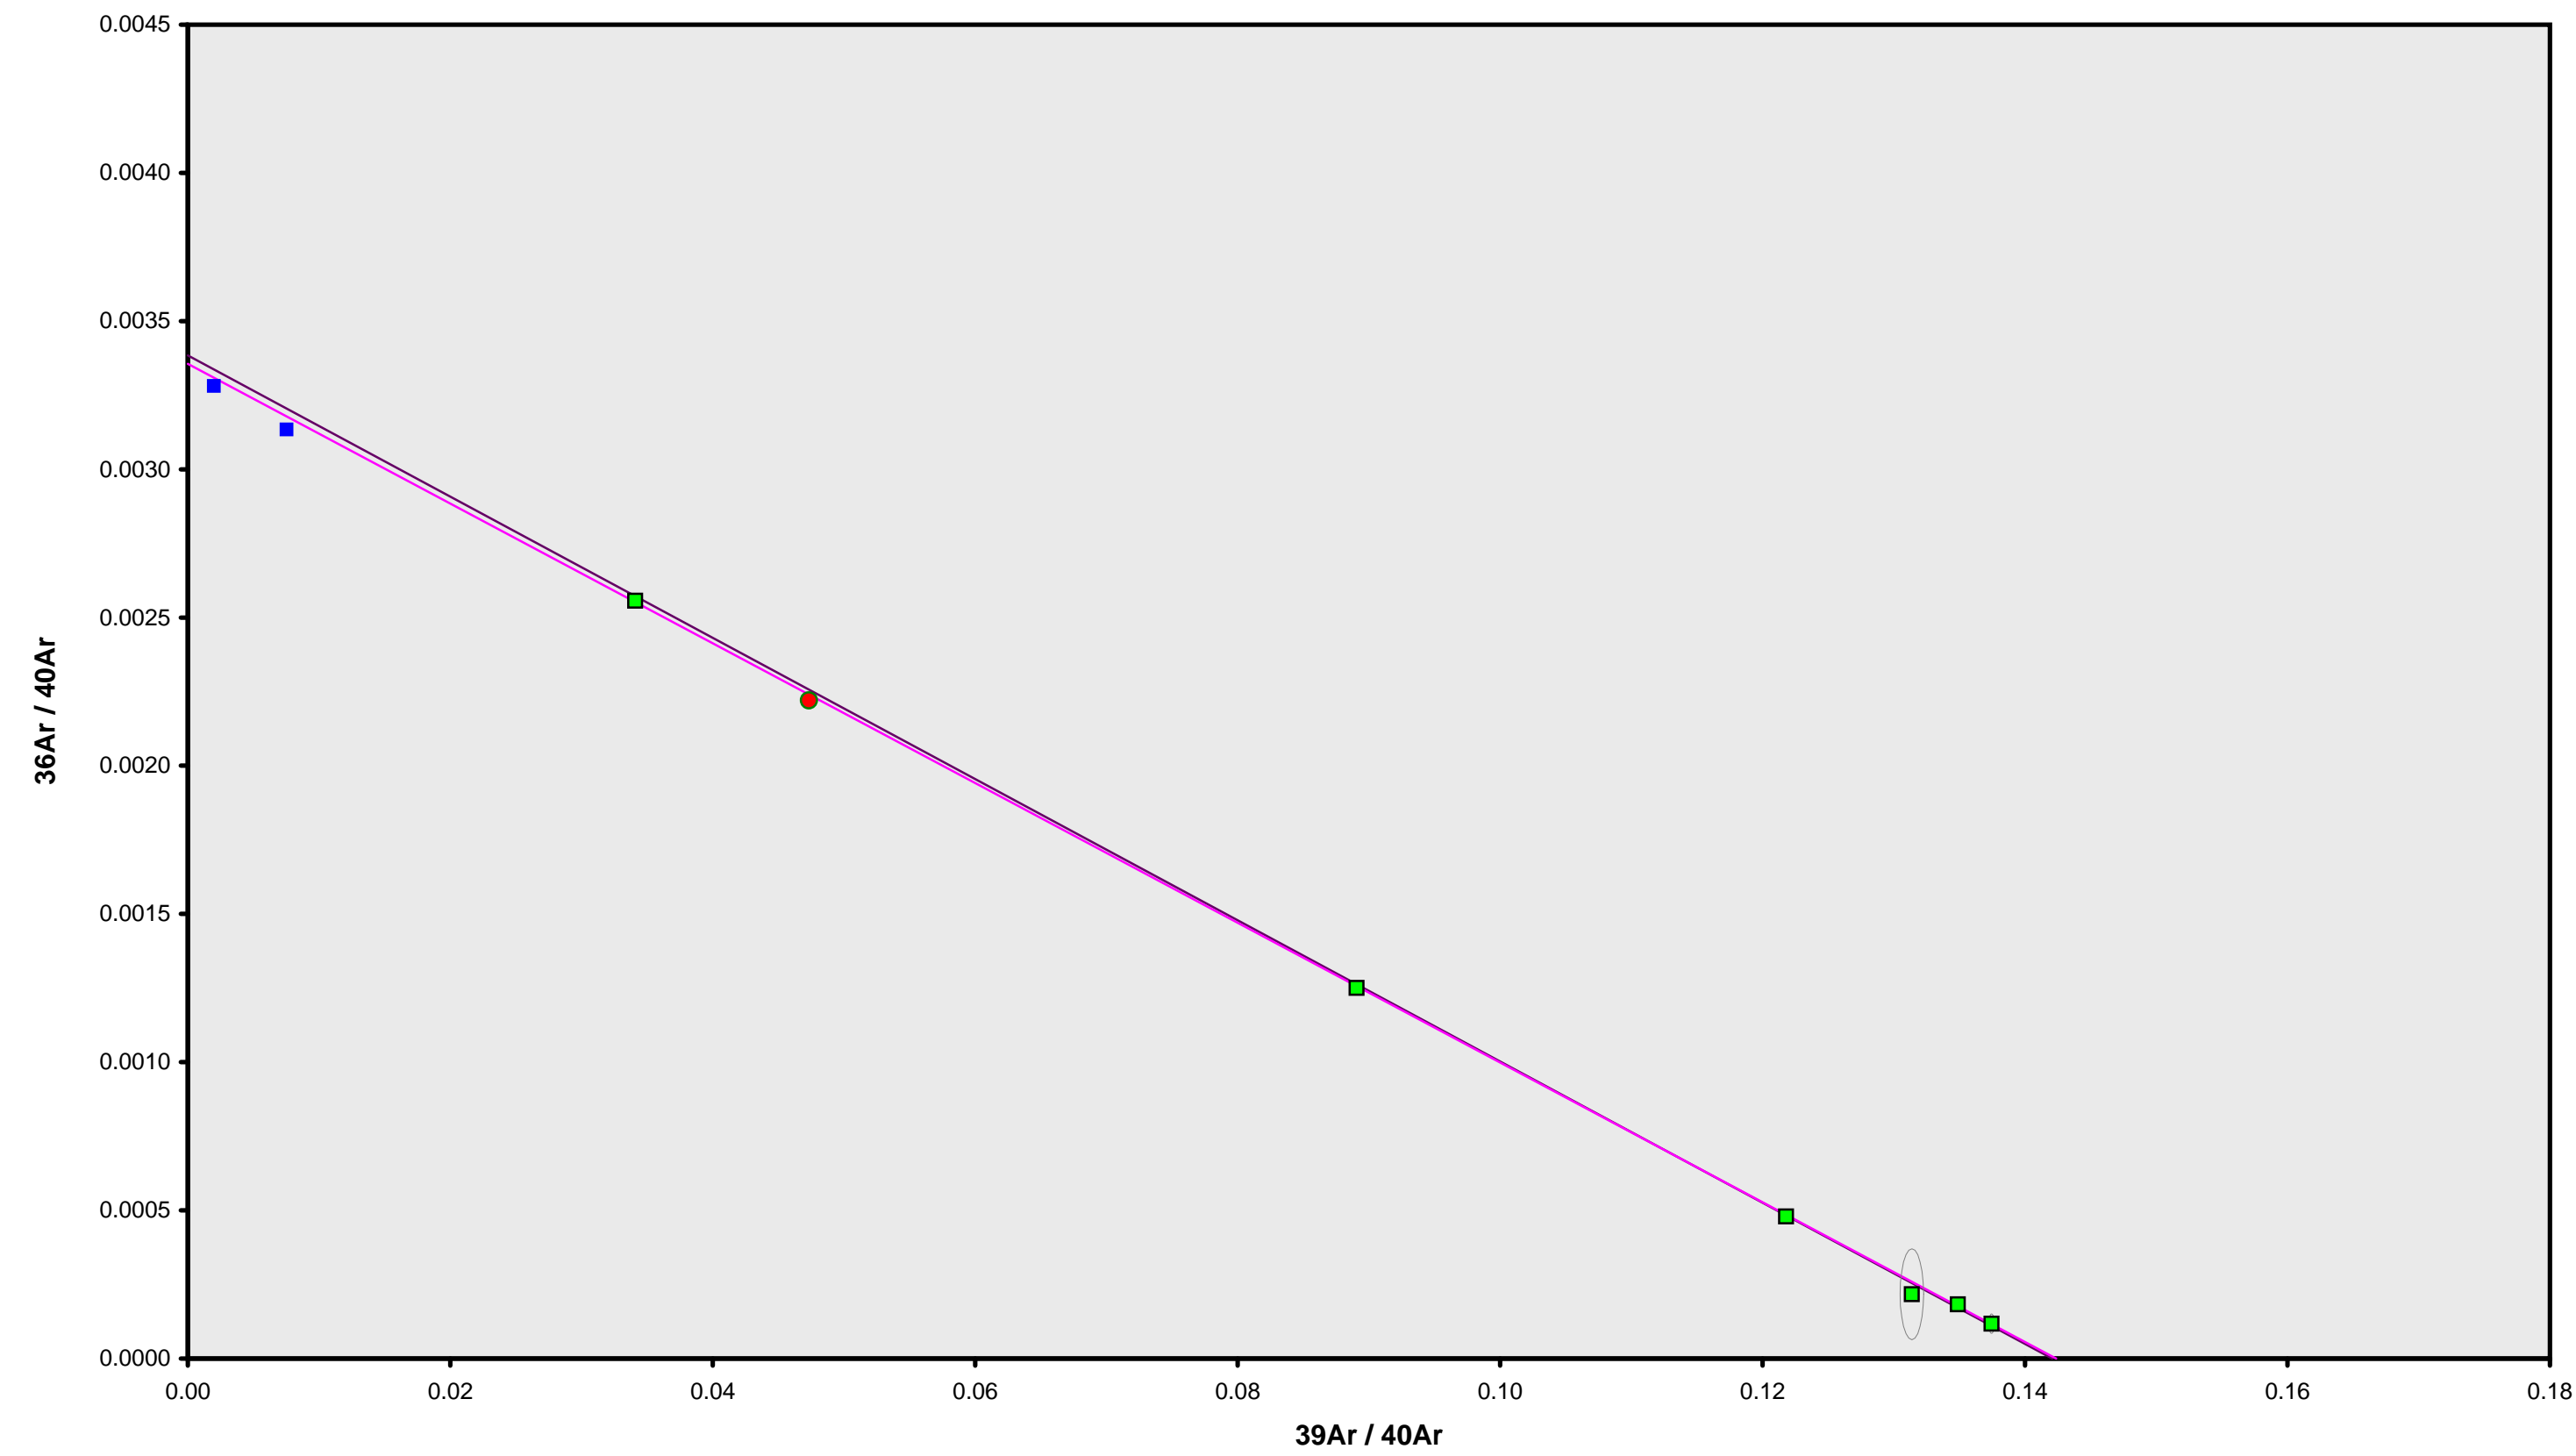

**Ar-Ages in Ma**

**WEIGHTED PLATEAU**  
19.66 ± 0.13

**TOTAL FUSION**  
20.29 ± 0.16

**NORMAL ISOCHRON**  
19.62 ± 0.13

**INVERSE ISOCHRON**  
19.62 ± 0.13

**MSWD (PROBABILITY)**  
0.43 (79%)

**SPREADING FACTOR**  
72.6%

**40AR/36AR INTERCEPT**  
298.0 ± 2.2

**Sample Info**

Groundmass  
Kerguelen Plateau  
Kyle Krawl

IRR = OSU2C13  
J = 0.00155670 ± 0.00000405

**RECALIBRATED AGE**



| Incremental Heating |         |   | 36Ar(a)<br>[V] | 37Ar(ca)<br>[V] | 38Ar(cl)<br>[V] | 39Ar(k)<br>[V] | 40Ar(r)<br>[V] | Age ± 2σ<br>(Ka) | 40Ar(r)<br>(%) | 39Ar(k)<br>(%) | K/Ca ± 2σ   |
|---------------------|---------|---|----------------|-----------------|-----------------|----------------|----------------|------------------|----------------|----------------|-------------|
| 13C2073             | 500 °C  | ✓ | 0.0004826      | 0.0065492       | 0.0003116       | 0.0164152      | 0.0030265      | 523.1 ± 1644.6   | 2.08           | 1.63           | 1.08 ± 0.09 |
| 13C2075             | 600 °C  | ✓ | 0.0012170      | 0.0404964       | 0.0018764       | 0.1005498      | 0.0093776      | 264.6 ± 348.5    | 2.54           | 9.97           | 1.07 ± 0.05 |
| 13C2076             | 700 °C  | ✓ | 0.0007276      | 0.0610081       | 0.0024609       | 0.1414194      | 0.0029311      | 58.8 ± 210.0     | 1.34           | 14.02          | 1.00 ± 0.04 |
| 13C2078             | 800 °C  | ✓ | 0.0007436      | 0.0940592       | 0.0034157       | 0.2111416      | 0.0068076      | 91.5 ± 184.6     | 3.00           | 20.93          | 0.97 ± 0.04 |
| 13C2079             | 900 °C  | ✓ | 0.0005299      | 0.0728682       | 0.0023789       | 0.1526542      | 0.0173640      | 322.7 ± 255.3    | 9.97           | 15.13          | 0.90 ± 0.04 |
| 13C2081             | 1050 °C | ✓ | 0.0006936      | 0.0910591       | 0.0020307       | 0.1313725      | 0.0083526      | 180.4 ± 215.8    | 3.91           | 13.02          | 0.62 ± 0.03 |
| 13C2082             | 1250 °C | ✓ | 0.0013605      | 0.2326784       | 0.0026208       | 0.1843204      | 0.0124836      | 192.2 ± 231.1    | 3.01           | 18.27          | 0.34 ± 0.01 |
| 13C2084             | 1400 °C | ✓ | 0.0004252      | 0.1148307       | 0.0009863       | 0.0707494      | 0.0063803      | 255.9 ± 346.1    | 4.83           | 7.01           | 0.26 ± 0.01 |

|  |   |  |           |           |           |           |           |  |  |  |  |
|--|---|--|-----------|-----------|-----------|-----------|-----------|--|--|--|--|
|  | Σ |  | 0.0061801 | 0.7135494 | 0.0160815 | 1.0086225 | 0.0667234 |  |  |  |  |
|--|---|--|-----------|-----------|-----------|-----------|-----------|--|--|--|--|

| Information on Analysis                                                                                                                                                                                                                        | Results          | 40(r)/39(k) ± 2σ           | Age ± 2σ (Ka)              | MSWD     | 39Ar(k) (% ,n)      | K/Ca ± 2σ   |
|------------------------------------------------------------------------------------------------------------------------------------------------------------------------------------------------------------------------------------------------|------------------|----------------------------|----------------------------|----------|---------------------|-------------|
| Sample = 274-2<br>Material = Groundmass<br>Location = Kerguelen Plateau<br>Analyst = Trevor Smith<br>Project = KERGUELEN<br>Mass Discrimination Law = LIN<br>Irradiation = OSU2C13<br>J = 0.00157287 ± 0.00001274<br>FCT-3 = 28.201 ± 0.023 Ma | Age Plateau      |                            |                            |          |                     |             |
|                                                                                                                                                                                                                                                | Recalibrated     | 0.05929 ± 0.03158 ± 53.27% | 168.2 ± 89.7 ± 53.29%      | 0.58 77% | 100.00 8            | 0.42 ± 0.19 |
|                                                                                                                                                                                                                                                |                  |                            | Full External Error ± 89.7 | 2.07     | 2σ Confidence Limit |             |
|                                                                                                                                                                                                                                                |                  |                            | Analytical Error ± 89.6    | 1.0000   | Error Magnification |             |
|                                                                                                                                                                                                                                                | Total Fusion Age |                            |                            |          |                     |             |
|                                                                                                                                                                                                                                                | Recalibrated     | 0.06615 ± 0.03332 ± 50.37% | 187.7 ± 94.6 ± 50.40%      |          | 8                   | 0.61 ± 0.01 |
|                                                                                                                                                                                                                                                |                  |                            | Full External Error ± 94.7 |          |                     |             |
|                                                                                                                                                                                                                                                |                  |                            | Analytical Error ± 94.5    |          |                     |             |



| Normal Isochron |         |   | 39(k)/36(a) ± 2σ | 40(a+r)/36(a) ± 2σ | r.i.   |
|-----------------|---------|---|------------------|--------------------|--------|
| 13C2073         | 500 °C  | ✓ | 34.01 ± 2.26     | 301.77 ± 20.13     | 0.9894 |
| 13C2075         | 600 °C  | ✓ | 82.62 ± 2.84     | 303.21 ± 10.41     | 0.9895 |
| 13C2076         | 700 °C  | ✓ | 194.36 ± 9.41    | 299.53 ± 14.58     | 0.9889 |
| 13C2078         | 800 °C  | ✓ | 283.94 ± 17.74   | 304.65 ± 19.04     | 0.9930 |
| 13C2079         | 900 °C  | ✓ | 288.08 ± 25.22   | 328.27 ± 28.78     | 0.9955 |
| 13C2081         | 1050 °C | ✓ | 189.41 ± 9.21    | 307.54 ± 14.99     | 0.9886 |
| 13C2082         | 1250 °C | ✓ | 135.48 ± 5.06    | 304.68 ± 11.38     | 0.9937 |
| 13C2084         | 1400 °C | ✓ | 166.37 ± 11.35   | 310.50 ± 21.31     | 0.9886 |

| Results                         | 40(a)/36(a) ± 2σ          | 40(r)/39(k) ± 2σ               | Age ± 2σ (Ka)               | MSWD            |
|---------------------------------|---------------------------|--------------------------------|-----------------------------|-----------------|
| Normal Isochron<br>Recalibrated | 300.72 ± 12.56<br>± 4.17% | 0.02843 ± 0.07639<br>± 268.70% | 80.7 ± 216.7                | 0.54            |
|                                 |                           |                                | ± 268.70%                   | 78%             |
|                                 |                           |                                | Full External Error ± 216.8 |                 |
|                                 |                           |                                | Analytical Error ± 216.7    |                 |
| Statistics                      | 2σ Confidence Limit       | 2.15                           | Convergence                 | 0.000000000008  |
|                                 | Error Magnification       | 1.0000                         | Number of Iterations        | 7               |
|                                 | Number of Data Points     | 8                              | Calculated Line             | Weighted York-2 |



| Inverse Isochron |         | 39(k)/40(a+r) ± 2σ |                       | 36(a)/40(a+r) ± 2σ      | r.i.   |
|------------------|---------|--------------------|-----------------------|-------------------------|--------|
| 13C2073          | 500 °C  | ✓                  | 0.1127067 ± 0.0010928 | 0.00331377 ± 0.00022106 | 0.0999 |
| 13C2075          | 600 °C  | ✓                  | 0.2724963 ± 0.0013538 | 0.00329809 ± 0.00011324 | 0.0755 |
| 13C2076          | 700 °C  | ✓                  | 0.6488781 ± 0.0046882 | 0.00333858 ± 0.00016246 | 0.1089 |
| 13C2078          | 800 °C  | ✓                  | 0.9319984 ± 0.0068962 | 0.00328241 ± 0.00020510 | 0.0595 |
| 13C2079          | 900 °C  | ✓                  | 0.8775671 ± 0.0072665 | 0.00304629 ± 0.00026705 | 0.0629 |
| 13C2081          | 1050 °C | ✓                  | 0.6158834 ± 0.0045317 | 0.00325158 ± 0.00015843 | 0.0881 |
| 13C2082          | 1250 °C | ✓                  | 0.4446599 ± 0.0018583 | 0.00328218 ± 0.00012255 | 0.0520 |
| 13C2084          | 1400 °C | ✓                  | 0.5358164 ± 0.0055331 | 0.00322057 ± 0.00022102 | 0.1141 |

| Results          | 40(a)/36(a) ± 2σ      | 40(r)/39(k) ± 2σ  | Age ± 2σ (Ka)              | MSWD            |
|------------------|-----------------------|-------------------|----------------------------|-----------------|
| Inverse Isochron | 300.26 ± 12.51        | 0.03308 ± 0.03184 | 93.9 ± 90.4                | 0.57            |
| Clustered Points | ± 4.17%               | ± 96.24%          | ± 96.25%                   | 75%             |
|                  |                       |                   | Full External Error ± 90.4 |                 |
|                  |                       |                   | Analytical Error ± 90.3    |                 |
|                  |                       |                   |                            |                 |
| Statistics       | 2σ Confidence Limit   | 2.15              | Convergence                | 0.0000000157    |
|                  | Error Magnification   | 1.0000            | Number of Iterations       | 4               |
|                  | Number of Data Points | 8                 | Calculated Line            | Weighted York-2 |
|                  | Spreading Factor      | 2.7%              |                            |                 |



| OSU Argon Geochronology Lab |         |   |           |           |           |           |           |           |           |           |           |           |                   |                |             |             |             |
|-----------------------------|---------|---|-----------|-----------|-----------|-----------|-----------|-----------|-----------|-----------|-----------|-----------|-------------------|----------------|-------------|-------------|-------------|
| Relative Abundances         |         |   | 40Ar      |           | 39Ar      |           | 38Ar      |           | 37Ar      |           | 36Ar      |           | 40(r)/39(k) ± 2σ  | Age ± 2σ (Ka)  | 40Ar(r) (%) | 39Ar(k) (%) | K/Ca ± 2σ   |
|                             |         |   | [V]       | 1σ        |                   |                |             |             |             |
| 13C2073                     | 500 °C  | ✓ | 0.1456615 | 0.0005853 | 0.0164196 | 0.0000445 | 0.0005895 | 0.0000274 | 0.0065492 | 0.0002872 | 0.0004844 | 0.0000160 | 0.18437 ± 0.57977 | 523.1 ± 1644.6 | 2.08        | 1.63        | 1.08 ± 0.09 |
| 13C2075                     | 600 °C  | ✓ | 0.3690965 | 0.0006622 | 0.1005770 | 0.0001727 | 0.0032537 | 0.0000308 | 0.0404964 | 0.0009152 | 0.0012281 | 0.0000208 | 0.09326 ± 0.12284 | 264.6 ± 348.5  | 2.54        | 9.97        | 1.07 ± 0.05 |
| 13C2076                     | 700 °C  | ✓ | 0.2180873 | 0.0006742 | 0.1414605 | 0.0002638 | 0.0042147 | 0.0000347 | 0.0610081 | 0.0013506 | 0.0007443 | 0.0000176 | 0.02073 ± 0.07400 | 58.8 ± 210.0   | 1.34        | 14.02       | 1.00 ± 0.04 |
| 13C2078                     | 800 °C  | ✓ | 0.2267604 | 0.0005939 | 0.2112049 | 0.0005512 | 0.0059705 | 0.0000512 | 0.0940592 | 0.0020573 | 0.0007692 | 0.0000231 | 0.03224 ± 0.06504 | 91.5 ± 184.6   | 3.00        | 20.93       | 0.97 ± 0.04 |
| 13C2079                     | 900 °C  | ✓ | 0.1741058 | 0.0005879 | 0.1527032 | 0.0003650 | 0.0042253 | 0.0000319 | 0.0728682 | 0.0016168 | 0.0005496 | 0.0000232 | 0.11375 ± 0.08999 | 322.7 ± 255.3  | 9.97        | 15.13       | 0.90 ± 0.04 |
| 13C2081                     | 1050 °C | ✓ | 0.2134401 | 0.0005993 | 0.1314338 | 0.0003120 | 0.0036681 | 0.0000339 | 0.0910591 | 0.0020031 | 0.0007181 | 0.0000168 | 0.06358 ± 0.07606 | 180.4 ± 215.8  | 3.91        | 13.02       | 0.62 ± 0.03 |
| 13C2082                     | 1250 °C | ✓ | 0.4147061 | 0.0005902 | 0.1844770 | 0.0002819 | 0.0050050 | 0.0000369 | 0.2326784 | 0.0050538 | 0.0014225 | 0.0000253 | 0.06773 ± 0.08146 | 192.2 ± 231.1  | 3.01        | 18.27       | 0.34 ± 0.01 |
| 13C2084                     | 1400 °C | ✓ | 0.1321118 | 0.0005936 | 0.0708267 | 0.0001797 | 0.0018869 | 0.0000330 | 0.1148307 | 0.0025138 | 0.0004558 | 0.0000145 | 0.09018 ± 0.12200 | 255.9 ± 346.1  | 4.83        | 7.01        | 0.26 ± 0.01 |

|   |  |  |           |           |           |           |           |           |           |           |           |           |  |  |  |  |
|---|--|--|-----------|-----------|-----------|-----------|-----------|-----------|-----------|-----------|-----------|-----------|--|--|--|--|
| Σ |  |  | 1.8939697 | 0.0017303 | 1.0091027 | 0.0008646 | 0.0288138 | 0.0001007 | 0.7135494 | 0.0067426 | 0.0063719 | 0.0000565 |  |  |  |  |
|---|--|--|-----------|-----------|-----------|-----------|-----------|-----------|-----------|-----------|-----------|-----------|--|--|--|--|

| Information on Analysis and Constants Used in Calculations |                                                                 | Results          |                  |               |      |               |           |  |
|------------------------------------------------------------|-----------------------------------------------------------------|------------------|------------------|---------------|------|---------------|-----------|--|
|                                                            |                                                                 | 40(a)/36(a) ± 2σ | 40(r)/39(k) ± 2σ | Age ± 2σ (Ka) | MSWD | 39Ar(k) (%.n) | K/Ca ± 2σ |  |
| Sample = 274-2                                             | Age Equations = Min et al. (2000)                               |                  |                  |               |      |               |           |  |
| Material = Groundmass                                      | Negative Intensities = Allowed                                  |                  |                  |               |      |               |           |  |
| Location = Kerguelen Plateau                               | Decay Constant 40K = 5.543 ± 0.044 E-10 1/a                     |                  |                  |               |      |               |           |  |
| Analyst = Trevor Smith                                     | Decay Constant 39Ar = 2.940 ± 0.029 E-07 1/h                    |                  |                  |               |      |               |           |  |
| Project = KERGUELEN                                        | Decay Constant 37Ar = 8.230 ± 0.082 E-04 1/h                    |                  |                  |               |      |               |           |  |
| Mass Discrimination Law = LIN                              | Decay Constant 36Cl = 2.236 ± 0.045 E-06 1/a                    |                  |                  |               |      |               |           |  |
| Irradiation = OSU2C13                                      | Decay Constant 40K(EC,β <sup>+</sup> ) = 0.580 ± 0.009 E-10 1/a |                  |                  |               |      |               |           |  |
| J = 0.00157287 ± 0.00001274                                | Decay Constant 40K(β <sup>-</sup> ) = 4.950 ± 0.043 E-10 1/a    |                  |                  |               |      |               |           |  |
| FCT-3 = 28.201 ± 0.023 Ma                                  | Atmospheric Ratio 40/36(a) = 295.50                             |                  |                  |               |      |               |           |  |
| IGSN = Undefined                                           | Atmospheric Ratio 38/36(a) = 0.1869                             |                  |                  |               |      |               |           |  |
| Preferred Age = Undefined                                  | Production Ratio 39/37(ca) = 0.000673                           |                  |                  |               |      |               |           |  |
| Classification = Undefined                                 | Production Ratio 38/37(ca) = 0.000139                           |                  |                  |               |      |               |           |  |
| Experiment Type = Undefined                                | Production Ratio 36/37(ca) = 0.000264                           |                  |                  |               |      |               |           |  |
| Extraction Method = Undefined                              | Production Ratio 40/39(k) = 0.001010                            |                  |                  |               |      |               |           |  |
| Heating = 0 sec                                            | Production Ratio 38/39(k) = 0.011380                            |                  |                  |               |      |               |           |  |
| Isolation = 15.00 min                                      | Production Ratio 36/38(cl) = 316.00 ± 15.80                     |                  |                  |               |      |               |           |  |
| Instrument = MAP215-50                                     | Scaling Ratio K/Ca = 0.430                                      |                  |                  |               |      |               |           |  |
| Lithology = Undefined                                      | Abundance Ratio 40K/K = 1.1700 ± 0.0199 E-04                    |                  |                  |               |      |               |           |  |
| Lat-Lon = Undefined - Undefined                            | Atomic Weight K = 39.0983 ± 0.0001 g                            |                  |                  |               |      |               |           |  |
| R1 ratio = Undefined                                       | Recalibrated to FCT-3 Secondary Standard                        |                  |                  |               |      |               |           |  |
| R2 ratio = Undefined                                       | Standard Age = 28.201 ± 0.023 Ma                                |                  |                  |               |      |               |           |  |
| R3 ratio = Undefined                                       |                                                                 |                  |                  |               |      |               |           |  |
| R4 ratio = Undefined                                       |                                                                 |                  |                  |               |      |               |           |  |
| R5 ratio = Undefined                                       |                                                                 |                  |                  |               |      |               |           |  |
| Collector Calibrations =                                   |                                                                 |                  |                  |               |      |               |           |  |
|                                                            |                                                                 |                  |                  |               |      |               |           |  |
|                                                            |                                                                 |                  |                  |               |      |               |           |  |
|                                                            |                                                                 |                  |                  |               |      |               |           |  |
|                                                            |                                                                 |                  |                  |               |      |               |           |  |
|                                                            |                                                                 |                  |                  |               |      |               |           |  |
|                                                            |                                                                 |                  |                  |               |      |               |           |  |
|                                                            |                                                                 |                  |                  |               |      |               |           |  |
|                                                            |                                                                 |                  |                  |               |      |               |           |  |
|                                                            |                                                                 |                  |                  |               |      |               |           |  |
|                                                            |                                                                 |                  |                  |               |      |               |           |  |
|                                                            |                                                                 |                  |                  |               |      |               |           |  |
|                                                            |                                                                 |                  |                  |               |      |               |           |  |
|                                                            |                                                                 |                  |                  |               |      |               |           |  |
|                                                            |                                                                 |                  |                  |               |      |               |           |  |
|                                                            |                                                                 |                  |                  |               |      |               |           |  |
|                                                            |                                                                 |                  |                  |               |      |               |           |  |
|                                                            |                                                                 |                  |                  |               |      |               |           |  |
|                                                            |                                                                 |                  |                  |               |      |               |           |  |
|                                                            |                                                                 |                  |                  |               |      |               |           |  |
|                                                            |                                                                 |                  |                  |               |      |               |           |  |
|                                                            |                                                                 |                  |                  |               |      |               |           |  |
|                                                            |                                                                 |                  |                  |               |      |               |           |  |
|                                                            |                                                                 |                  |                  |               |      |               |           |  |
|                                                            |                                                                 |                  |                  |               |      |               |           |  |
|                                                            |                                                                 |                  |                  |               |      |               |           |  |
|                                                            |                                                                 |                  |                  |               |      |               |           |  |
|                                                            |                                                                 |                  |                  |               |      |               |           |  |
|                                                            |                                                                 |                  |                  |               |      |               |           |  |
|                                                            |                                                                 |                  |                  |               |      |               |           |  |
|                                                            |                                                                 |                  |                  |               |      |               |           |  |
|                                                            |                                                                 |                  |                  |               |      |               |           |  |
|                                                            |                                                                 |                  |                  |               |      |               |           |  |
|                                                            |                                                                 |                  |                  |               |      |               |           |  |
|                                                            |                                                                 |                  |                  |               |      |               |           |  |
|                                                            |                                                                 |                  |                  |               |      |               |           |  |
|                                                            |                                                                 |                  |                  |               |      |               |           |  |
|                                                            |                                                                 |                  |                  |               |      |               |           |  |
|                                                            |                                                                 |                  |                  |               |      |               |           |  |
|                                                            |                                                                 |                  |                  |               |      |               |           |  |
|                                                            |                                                                 |                  |                  |               |      |               |           |  |
|                                                            |                                                                 |                  |                  |               |      |               |           |  |
|                                                            |                                                                 |                  |                  |               |      |               |           |  |
|                                                            |                                                                 |                  |                  |               |      |               |           |  |
|                                                            |                                                                 |                  |                  |               |      |               |           |  |
|                                                            |                                                                 |                  |                  |               |      |               |           |  |
|                                                            |                                                                 |                  |                  |               |      |               |           |  |
|                                                            |                                                                 |                  |                  |               |      |               |           |  |
|                                                            |                                                                 |                  |                  |               |      |               |           |  |
|                                                            |                                                                 |                  |                  |               |      |               |           |  |
|                                                            |                                                                 |                  |                  |               |      |               |           |  |
|                                                            |                                                                 |                  |                  |               |      |               |           |  |
|                                                            |                                                                 |                  |                  |               |      |               |           |  |
|                                                            |                                                                 |                  |                  |               |      |               |           |  |
|                                                            |                                                                 |                  |                  |               |      |               |           |  |
|                                                            |                                                                 |                  |                  |               |      |               |           |  |
|                                                            |                                                                 |                  |                  |               |      |               |           |  |
|                                                            |                                                                 |                  |                  |               |      |               |           |  |
|                                                            |                                                                 |                  |                  |               |      |               |           |  |
|                                                            |                                                                 |                  |                  |               |      |               |           |  |
|                                                            |                                                                 |                  |                  |               |      |               |           |  |
|                                                            |                                                                 |                  |                  |               |      |               |           |  |
|                                                            |                                                                 |                  |                  |               |      |               |           |  |
|                                                            |                                                                 |                  |                  |               |      |               |           |  |
|                                                            |                                                                 |                  |                  |               |      |               |           |  |
|                                                            |                                                                 |                  |                  |               |      |               |           |  |
|                                                            |                                                                 |                  |                  |               |      |               |           |  |
|                                                            |                                                                 |                  |                  |               |      |               |           |  |
|                                                            |                                                                 |                  |                  |               |      |               |           |  |
|                                                            |                                                                 |                  |                  |               |      |               |           |  |
|                                                            |                                                                 |                  |                  |               |      |               |           |  |
|                                                            |                                                                 |                  |                  |               |      |               |           |  |
|                                                            |                                                                 |                  |                  |               |      |               |           |  |
|                                                            |                                                                 |                  |                  |               |      |               |           |  |
|                                                            |                                                                 |                  |                  |               |      |               |           |  |
|                                                            |                                                                 |                  |                  |               |      |               |           |  |
|                                                            |                                                                 |                  |                  |               |      |               |           |  |
|                                                            |                                                                 |                  |                  |               |      |               |           |  |
|                                                            |                                                                 |                  |                  |               |      |               |           |  |
|                                                            |                                                                 |                  |                  |               |      |               |           |  |
|                                                            |                                                                 |                  |                  |               |      |               |           |  |
|                                                            |                                                                 |                  |                  |               |      |               |           |  |
|                                                            |                                                                 |                  |                  |               |      |               |           |  |
|                                                            |                                                                 |                  |                  |               |      |               |           |  |
|                                                            |                                                                 |                  |                  |               |      |               |           |  |
|                                                            |                                                                 |                  |                  |               |      |               |           |  |
|                                                            |                                                                 |                  |                  |               |      |               |           |  |
|                                                            |                                                                 |                  |                  |               |      |               |           |  |
|                                                            |                                                                 |                  |                  |               |      |               |           |  |
|                                                            |                                                                 |                  |                  |               |      |               |           |  |
|                                                            |                                                                 |                  |                  |               |      |               |           |  |
|                                                            |                                                                 |                  |                  |               |      |               |           |  |
|                                                            |                                                                 |                  |                  |               |      |               |           |  |
|                                                            |                                                                 |                  |                  |               |      |               |           |  |
|                                                            |                                                                 |                  |                  |               |      |               |           |  |
|                                                            |                                                                 |                  |                  |               |      |               |           |  |
|                                                            |                                                                 |                  |                  |               |      |               |           |  |
|                                                            |                                                                 |                  |                  |               |      |               |           |  |
|                                                            |                                                                 |                  |                  |               |      |               |           |  |
|                                                            |                                                                 |                  |                  |               |      |               |           |  |
|                                                            |                                                                 |                  |                  |               |      |               |           |  |
|                                                            |                                                                 |                  |                  |               |      |               |           |  |
|                                                            |                                                                 |                  |                  |               |      |               |           |  |
|                                                            |                                                                 |                  |                  |               |      |               |           |  |
|                                                            |                                                                 |                  |                  |               |      |               |           |  |
|                                                            |                                                                 |                  |                  |               |      |               |           |  |
|                                                            |                                                                 |                  |                  |               |      |               |           |  |
|                                                            |                                                                 |                  |                  |               |      |               |           |  |
|                                                            |                                                                 |                  |                  |               |      |               |           |  |
|                                                            |                                                                 |                  |                  |               |      |               |           |  |
|                                                            |                                                                 |                  |                  |               |      |               |           |  |
|                                                            |                                                                 |                  |                  |               |      |               |           |  |
|                                                            |                                                                 |                  |                  |               |      |               |           |  |
|                                                            |                                                                 |                  |                  |               |      |               |           |  |
|                                                            |                                                                 |                  |                  |               |      |               |           |  |
|                                                            |                                                                 |                  |                  |               |      |               |           |  |
|                                                            |                                                                 |                  |                  |               |      |               |           |  |
|                                                            |                                                                 |                  |                  |               |      |               |           |  |
|                                                            |                                                                 |                  |                  |               |      |               |           |  |
|                                                            |                                                                 |                  |                  |               |      |               |           |  |
|                                                            |                                                                 |                  |                  |               |      |               |           |  |
|                                                            |                                                                 |                  |                  |               |      |               |           |  |
|                                                            |                                                                 |                  |                  |               |      |               |           |  |
|                                                            |                                                                 |                  |                  |               |      |               |           |  |
|                                                            |                                                                 |                  |                  |               |      |               |           |  |
|                                                            |                                                                 |                  |                  |               |      |               |           |  |
|                                                            |                                                                 |                  |                  |               |      |               |           |  |
|                                                            |                                                                 |                  |                  |               |      |               |           |  |
|                                                            |                                                                 |                  |                  |               |      |               |           |  |
|                                                            |                                                                 |                  |                  |               |      |               |           |  |
|                                                            |                                                                 |                  |                  |               |      |               |           |  |
|                                                            |                                                                 |                  |                  |               |      |               |           |  |
|                                                            |                                                                 |                  |                  |               |      | </            |           |  |



| OSU Argon Geochronology Lab |         |         |                |           |                |           |                 |           |                 |           |                 |           |                |           |                |           |                |           |                 |           |                 |           |                |           |                 |           |                |           |                |           |                |           |                |           |      |
|-----------------------------|---------|---------|----------------|-----------|----------------|-----------|-----------------|-----------|-----------------|-----------|-----------------|-----------|----------------|-----------|----------------|-----------|----------------|-----------|-----------------|-----------|-----------------|-----------|----------------|-----------|-----------------|-----------|----------------|-----------|----------------|-----------|----------------|-----------|----------------|-----------|------|
| Degassing<br>Patterns       |         |         | 36Ar(a)<br>[V] | %1σ       | 36Ar(c)<br>[V] | %1σ       | 36Ar(ca)<br>[V] | %1σ       | 36Ar(cl)<br>[V] | %1σ       | 37Ar(ca)<br>[V] | %1σ       | 38Ar(a)<br>[V] | %1σ       | 38Ar(c)<br>[V] | %1σ       | 38Ar(k)<br>[V] | %1σ       | 38Ar(ca)<br>[V] | %1σ       | 38Ar(cl)<br>[V] | %1σ       | 39Ar(k)<br>[V] | %1σ       | 39Ar(ca)<br>[V] | %1σ       | 40Ar(r)<br>[V] | %1σ       | 40Ar(a)<br>[V] | %1σ       | 40Ar(c)<br>[V] | %1σ       | 40Ar(k)<br>[V] | %1σ       |      |
|                             | 13C2073 | 500 °C  | ✓              | 0.0004826 | 3.31           | 0.0000000 | 0.00            | 0.0000017 | 4.38            | 0.0000001 | 10.34           | 0.0065492 | 4.38           | 0.0000902 | 3.31           | 0.0000000 | 0.00           | 0.0001868 | 0.27            | 0.0000009 | 4.38            | 0.0003116 | 11.66          | 0.0164152 | 0.27            | 0.0000044 | 4.38           | 0.0030265 | 157.22         | 0.1426184 | 3.31           | 0.0000000 | 0.00           | 0.0000166 | 0.27 |
|                             | 13C2075 | 600 °C  | ✓              | 0.0012170 | 1.71           | 0.0000000 | 0.00            | 0.0000107 | 2.26            | 0.0000004 | 5.64            | 0.0404964 | 2.26           | 0.0002275 | 1.71           | 0.0000000 | 0.00           | 0.0011443 | 0.17            | 0.0000056 | 2.26            | 0.0018764 | 7.79           | 0.1005498 | 0.17            | 0.0000273 | 2.26           | 0.0093776 | 65.86          | 0.3596174 | 1.71           | 0.0000000 | 0.00           | 0.0001016 | 0.17 |
|                             | 13C2076 | 700 °C  | ✓              | 0.0007276 | 2.41           | 0.0000000 | 0.00            | 0.0000161 | 2.21            | 0.0000005 | 5.57            | 0.0610081 | 2.21           | 0.0001360 | 2.41           | 0.0000000 | 0.00           | 0.0016094 | 0.19            | 0.0000085 | 2.21            | 0.0024609 | 7.75           | 0.1414194 | 0.19            | 0.0000411 | 2.21           | 0.0029311 | 178.52         | 0.2150133 | 2.41           | 0.0000000 | 0.00           | 0.0001428 | 0.19 |
|                             | 13C2078 | 800 °C  | ✓              | 0.0007436 | 3.11           | 0.0000000 | 0.00            | 0.0000248 | 2.19            | 0.0000007 | 5.59            | 0.0940592 | 2.19           | 0.0001390 | 3.11           | 0.0000000 | 0.00           | 0.0024028 | 0.26            | 0.0000131 | 2.19            | 0.0034157 | 7.77           | 0.2111416 | 0.26            | 0.0000633 | 2.19           | 0.0068076 | 100.87         | 0.2197396 | 3.11           | 0.0000000 | 0.00           | 0.0002133 | 0.26 |
|                             | 13C2079 | 900 °C  | ✓              | 0.0005299 | 4.37           | 0.0000000 | 0.00            | 0.0000192 | 2.22            | 0.0000005 | 5.56            | 0.0728682 | 2.22           | 0.0000990 | 4.37           | 0.0000000 | 0.00           | 0.0017372 | 0.24            | 0.0000101 | 2.22            | 0.0023789 | 7.74           | 0.1526542 | 0.24            | 0.0000490 | 2.22           | 0.0173640 | 39.55          | 0.1565876 | 4.37           | 0.0000000 | 0.00           | 0.0001542 | 0.24 |
|                             | 13C2081 | 1050 °C | ✓              | 0.0006936 | 2.42           | 0.0000000 | 0.00            | 0.0000240 | 2.20            | 0.0000004 | 5.64            | 0.0910591 | 2.20           | 0.0001296 | 2.42           | 0.0000000 | 0.00           | 0.0014950 | 0.24            | 0.0000127 | 2.20            | 0.0020307 | 7.80           | 0.1313725 | 0.24            | 0.0000613 | 2.20           | 0.0083526 | 59.81          | 0.2049547 | 2.42           | 0.0000000 | 0.00           | 0.0001327 | 0.24 |
|                             | 13C2082 | 1250 °C | ✓              | 0.0013605 | 1.86           | 0.0000000 | 0.00            | 0.0000614 | 2.17            | 0.0000006 | 5.57            | 0.2326784 | 2.17           | 0.0002543 | 1.86           | 0.0000000 | 0.00           | 0.0020976 | 0.15            | 0.0000323 | 2.17            | 0.0026208 | 7.75           | 0.1843204 | 0.15            | 0.0001566 | 2.17           | 0.0124836 | 60.14          | 0.4020364 | 1.86           | 0.0000000 | 0.00           | 0.0001862 | 0.15 |
|                             | 13C2084 | 1400 °C | ✓              | 0.0004252 | 3.40           | 0.0000000 | 0.00            | 0.0000303 | 2.19            | 0.0000002 | 6.35            | 0.1148307 | 2.19           | 0.0000795 | 3.40           | 0.0000000 | 0.00           | 0.0008051 | 0.25            | 0.0000160 | 2.19            | 0.0009863 | 8.33           | 0.0707494 | 0.25            | 0.0000773 | 2.19           | 0.0063803 | 67.64          | 0.1256601 | 3.40           | 0.0000000 | 0.00           | 0.0000715 | 0.25 |
|                             |         | Σ       |                | 0.0061801 | 0.92           | 0.0000000 | 0.00            | 0.0001884 | 0.94            | 0.0000034 | 2.18            | 0.7135494 | 0.94           | 0.0011551 | 0.92           | 0.0000000 | 0.00           | 0.0114781 | 0.09            | 0.0000992 | 0.94            | 0.0160815 | 3.02           | 1.0086225 | 0.09            | 0.0004802 | 0.94           | 0.0667234 | 25.19          | 1.8262275 | 0.92           | 0.0000000 | 0.00           | 0.0010187 | 0.09 |
|                             |         | Σ       |                |           |                |           |                 |           |                 | 0.0063719 | 0.89            | 0.7135494 | 0.94           |           |                |           |                |           |                 |           |                 | 0.0288138 | 1.69           |           |                 | 1.0091027 | 0.09           |           |                |           |                |           |                | 1.8939697 | 1.25 |



| Additional<br>Parameters |         |   | 40Ar/39Ar | 1σ       | 37Ar/39Ar | 1σ       | 36Ar/39Ar | 1σ       | Time<br>(days) | 37Ar<br>(decay) | 39Ar<br>(decay) | 40Ar<br>(moles) |
|--------------------------|---------|---|-----------|----------|-----------|----------|-----------|----------|----------------|-----------------|-----------------|-----------------|
| 13C2073                  | 500 °C  | ✓ | 8.871215  | 0.043001 | 0.398867  | 0.017523 | 0.029503  | 0.000977 | 108.882        | 8.611548        | 1.00076945      | 2.913E-14       |
| 13C2075                  | 600 °C  | ✓ | 3.669789  | 0.009113 | 0.402640  | 0.009126 | 0.012210  | 0.000208 | 108.918        | 8.617693        | 1.00076970      | 7.382E-14       |
| 13C2076                  | 700 °C  | ✓ | 1.541684  | 0.005566 | 0.431273  | 0.009582 | 0.005261  | 0.000124 | 108.936        | 8.620767        | 1.00076983      | 4.362E-14       |
| 13C2078                  | 800 °C  | ✓ | 1.073651  | 0.003970 | 0.445346  | 0.009810 | 0.003642  | 0.000110 | 108.972        | 8.626918        | 1.00077009      | 4.535E-14       |
| 13C2079                  | 900 °C  | ✓ | 1.140158  | 0.004717 | 0.477188  | 0.010649 | 0.003599  | 0.000152 | 108.991        | 8.630114        | 1.00077022      | 3.482E-14       |
| 13C2081                  | 1050 °C | ✓ | 1.623936  | 0.005971 | 0.692814  | 0.015329 | 0.005463  | 0.000128 | 109.028        | 8.636508        | 1.00077048      | 4.269E-14       |
| 13C2082                  | 1250 °C | ✓ | 2.248010  | 0.004694 | 1.261287  | 0.027463 | 0.007711  | 0.000138 | 109.047        | 8.639707        | 1.00077062      | 8.294E-14       |
| 13C2084                  | 1400 °C | ✓ | 1.865284  | 0.009624 | 1.621291  | 0.035729 | 0.006435  | 0.000205 | 109.084        | 8.645991        | 1.00077088      | 2.642E-14       |



| Procedure |         | 36Ar      |           | 37Ar      |           | 38Ar      |           | 39Ar      |           | 40Ar      |           |
|-----------|---------|-----------|-----------|-----------|-----------|-----------|-----------|-----------|-----------|-----------|-----------|
|           |         | [V]       | 1σ        |
| 13C2073   | 500 °C  | 0.0003267 | 0.0000133 | 0.0000247 | 0.0000175 | 0.0000256 | 0.0000203 | 0.0000984 | 0.0000278 | 0.0025993 | 0.0005813 |
| 13C2075   | 600 °C  | 0.0003165 | 0.0000133 | 0.0000222 | 0.0000175 | 0.0000165 | 0.0000203 | 0.0000766 | 0.0000278 | 0.0027861 | 0.0005813 |
| 13C2076   | 700 °C  | 0.0003135 | 0.0000133 | 0.0000217 | 0.0000175 | 0.0000132 | 0.0000203 | 0.0000734 | 0.0000278 | 0.0028656 | 0.0005813 |
| 13C2078   | 800 °C  | 0.0003120 | 0.0000133 | 0.0000223 | 0.0000175 | 0.0000091 | 0.0000203 | 0.0000812 | 0.0000278 | 0.0024579 | 0.0005813 |
| 13C2079   | 900 °C  | 0.0003135 | 0.0000133 | 0.0000235 | 0.0000175 | 0.0000084 | 0.0000203 | 0.0000905 | 0.0000278 | 0.0019318 | 0.0005813 |
| 13C2081   | 1050 °C | 0.0003212 | 0.0000133 | 0.0000276 | 0.0000175 | 0.0000096 | 0.0000203 | 0.0001099 | 0.0000278 | 0.0007509 | 0.0005813 |
| 13C2082   | 1250 °C | 0.0003274 | 0.0000133 | 0.0000305 | 0.0000175 | 0.0000115 | 0.0000203 | 0.0001144 | 0.0000278 | 0.0005340 | 0.0005813 |
| 13C2084   | 1400 °C | 0.0003440 | 0.0000133 | 0.0000379 | 0.0000175 | 0.0000180 | 0.0000203 | 0.0000960 | 0.0000278 | 0.0024382 | 0.0005813 |



| OSU Argon Geochronology Lab |         |           |           |        |          |           |           |        |         |           |           |        |           |           |           |        |         |           |           |        |
|-----------------------------|---------|-----------|-----------|--------|----------|-----------|-----------|--------|---------|-----------|-----------|--------|-----------|-----------|-----------|--------|---------|-----------|-----------|--------|
| Intercept Values            |         | 36Ar [V]  | 1σ        | r2     |          | 37Ar [V]  | 1σ        | r2     |         | 38Ar [V]  | 1σ        | r2     |           | 39Ar [V]  | 1σ        | r2     |         | 40Ar [V]  | 1σ        | r2     |
| 13C2073                     | 500 °C  | 0.0008259 | 0.0000096 | 0.6324 | LIN # 8  | 0.0008024 | 0.0000240 | 0.4275 | LIN # 4 | 0.0006243 | 0.0000189 | 0.3071 | LIN #     | 0.0166461 | 0.0000348 | 0.9780 | EXP #   | 0.1484984 | 0.0000685 | 0.7718 |
| 13C2075                     | 600 °C  | 0.0015814 | 0.0000166 | 0.6617 | LIN #    | 0.0048277 | 0.0000275 | 0.9679 | EXP #   | 0.0033212 | 0.0000237 | 0.9554 | LIN #     | 0.1014478 | 0.0001691 | 0.9976 | EXP # 5 | 0.3725160 | 0.0003177 | 0.9959 |
| 13C2076                     | 700 °C  | 0.0010804 | 0.0000121 | 0.6477 | LIN #    | 0.0072587 | 0.0000319 | 0.9848 | EXP #   | 0.0042940 | 0.0000287 | 0.9594 | LIN #     | 0.1426509 | 0.0002609 | 0.9973 | EXP # 7 | 0.2213292 | 0.0003422 | 0.3169 |
| 13C2078                     | 800 °C  | 0.0011044 | 0.0000197 | 0.2985 | LIN #    | 0.0111708 | 0.0000366 | 0.9921 | EXP #   | 0.0060726 | 0.0000477 | 0.9559 | LIN #     | 0.2129324 | 0.0005512 | 0.9948 | EXP #   | 0.2295857 | 0.0001218 | 0.6940 |
| 13C2079                     | 900 °C  | 0.0008800 | 0.0000197 | 0.0006 | LIN #    | 0.0086580 | 0.0000413 | 0.9836 | EXP # 2 | 0.0042999 | 0.0000251 | 0.9762 | LIN #     | 0.1539994 | 0.0003639 | 0.9962 | EXP # 2 | 0.1763373 | 0.0000882 | 0.9763 |
| 13C2081                     | 1050 °C | 0.0010610 | 0.0000109 | 0.5331 | LIN #    | 0.0108085 | 0.0000426 | 0.9885 | EXP #   | 0.0037347 | 0.0000277 | 0.9593 | LIN #     | 0.1325682 | 0.0003107 | 0.9960 | EXP # 1 | 0.2145343 | 0.0001460 | 0.9863 |
| 13C2082                     | 1250 °C | 0.0017925 | 0.0000223 | 0.7533 | LIN #    | 0.0275710 | 0.0000651 | 0.9959 | EXP #   | 0.0050949 | 0.0000313 | 0.9734 | LIN # 1 9 | 0.1860480 | 0.0002772 | 0.9981 | EXP #   | 0.4159472 | 0.0001022 | 0.9995 |
| 13C2084                     | 1400 °C | 0.0008140 | 0.0000065 | 0.8831 | LIN # 10 | 0.0136211 | 0.0000460 | 0.9902 | EXP #   | 0.0019347 | 0.0000266 | 0.8435 | LIN #     | 0.0714892 | 0.0001777 | 0.9941 | EXP #   | 0.1347926 | 0.0001204 | 0.4452 |



| OSU Argon Geochronology Lab |         |         |        |            |                   |              |      |               |                  |       |                     |                    |     |            |       |               |     |         |       |              |                        |     |       |      |      |     |        |             |       |       |         |           |            |     |
|-----------------------------|---------|---------|--------|------------|-------------------|--------------|------|---------------|------------------|-------|---------------------|--------------------|-----|------------|-------|---------------|-----|---------|-------|--------------|------------------------|-----|-------|------|------|-----|--------|-------------|-------|-------|---------|-----------|------------|-----|
| Sample Parameters           |         |         | Sample | Material   | Location          | Analyst      | Temp | Standard Name | Standard (in Ma) | %1σ   | Standard Reference  | Standard 40Ar/39Ar | %1σ | J          | %1σ   | Air 40Ar/36Ar | %1σ | MDF     | %1σ   | Volume Ratio | Sensitivity (mol/volt) | Day | Month | Year | Hour | Min | Resist | Irradiation | X-pos | Y-pos | Z/H-pos | Project   | Experiment | Nmb |
|                             | 13C2073 | 500 °C  | 274-2  | Groundmass | Kerguelen Plateau | Trevor Smith | 500  | FCT-3         | 28.201           | 0.083 | Kuiper et al., 2008 |                    |     | 0.00157287 | 0.810 |               |     | 1.00697 | 0.030 | 0.9984       | 2E-13                  | 23  | JUL   | 2013 | 13   | 11  | 1      | OSU2C13     | 0.00  | 0.00  | 41.10   | Kerguelen | 13C2073    | 01  |
|                             | 13C2075 | 600 °C  | 274-2  | Groundmass | Kerguelen Plateau | Trevor Smith | 600  | FCT-3         | 28.03            | 0.01  | Kuiper et al., 2008 |                    |     | 0.00157287 | 0.810 |               |     | 1.00697 | 0.030 | 0.9983       | 2E-13                  | 23  | JUL   | 2013 | 14   | 3   | 1      | OSU2C13     | 0.00  | 0.00  | 41.10   | Kerguelen | 13C2073    | 01  |
|                             | 13C2076 | 700 °C  | 274-2  | Groundmass | Kerguelen Plateau | Trevor Smith | 700  | FCT-3         | 28.03            | 0.01  | Kuiper et al., 2008 |                    |     | 0.00157287 | 0.810 |               |     | 1.00697 | 0.030 | 0.9983       | 2E-13                  | 23  | JUL   | 2013 | 14   | 29  | 1      | OSU2C13     | 0.00  | 0.00  | 41.10   | Kerguelen | 13C2073    | 01  |
|                             | 13C2078 | 800 °C  | 274-2  | Groundmass | Kerguelen Plateau | Trevor Smith | 800  | FCT-3         | 28.03            | 0.01  | Kuiper et al., 2008 |                    |     | 0.00157287 | 0.810 |               |     | 1.00697 | 0.030 | 0.9984       | 2E-13                  | 23  | JUL   | 2013 | 15   | 21  | 1      | OSU2C13     | 0.00  | 0.00  | 41.10   | Kerguelen | 13C2073    | 01  |
|                             | 13C2079 | 900 °C  | 274-2  | Groundmass | Kerguelen Plateau | Trevor Smith | 900  | FCT-3         | 28.03            | 0.01  | Kuiper et al., 2008 |                    |     | 0.00157287 | 0.810 |               |     | 1.00697 | 0.030 | 0.9983       | 2E-13                  | 23  | JUL   | 2013 | 15   | 48  | 1      | OSU2C13     | 0.00  | 0.00  | 41.10   | Kerguelen | 13C2073    | 01  |
|                             | 13C2081 | 1050 °C | 274-2  | Groundmass | Kerguelen Plateau | Trevor Smith | 1050 | FCT-3         | 28.03            | 0.01  | Kuiper et al., 2008 |                    |     | 0.00157287 | 0.810 |               |     | 1.00697 | 0.030 | 0.9984       | 2E-13                  | 23  | JUL   | 2013 | 16   | 42  | 1      | OSU2C13     | 0.00  | 0.00  | 41.10   | Kerguelen | 13C2073    | 01  |
|                             | 13C2082 | 1250 °C | 274-2  | Groundmass | Kerguelen Plateau | Trevor Smith | 1250 | FCT-3         | 28.03            | 0.01  | Kuiper et al., 2008 |                    |     | 0.00157287 | 0.810 |               |     | 1.00697 | 0.030 | 0.9983       | 2E-13                  | 23  | JUL   | 2013 | 17   | 9   | 1      | OSU2C13     | 0.00  | 0.00  | 41.10   | Kerguelen | 13C2073    | 01  |
|                             | 13C2084 | 1400 °C | 274-2  | Groundmass | Kerguelen Plateau | Trevor Smith | 1400 | FCT-3         | 28.03            | 0.01  | Kuiper et al., 2008 |                    |     | 0.00157287 | 0.810 |               |     | 1.00697 | 0.030 | 0.9982       | 2E-13                  | 23  | JUL   | 2013 | 18   | 2   | 1      | OSU2C13     | 0.00  | 0.00  | 41.10   | Kerguelen | 13C2073    | 01  |



| OSU Argon Geochronology Lab |         |          |       |          |       |          |        |          |       |           |          |           |          |           |          |          |         |          |         |           |     |      |      |      |     |       |     |
|-----------------------------|---------|----------|-------|----------|-------|----------|--------|----------|-------|-----------|----------|-----------|----------|-----------|----------|----------|---------|----------|---------|-----------|-----|------|------|------|-----|-------|-----|
| Irradiation<br>Constants    |         | 40/36(a) | %1σ   | 40/36(c) | %1σ   | 38/36(a) | %1σ    | 38/36(c) | %1σ   | 39/37(ca) | %1σ      | 38/37(ca) | %1σ      | 36/37(ca) | %1σ      | 40/39(k) | %1σ     | 38/39(k) | %1σ     | 36/38(cl) | %1σ | K/Ca | %1σ  | K/Cl | %1σ | Ca/Cl | %1σ |
|                             | 13C2073 | 500 °C   | 295.5 | 0        | 0.018 | 35       | 0.1869 | 0        | 1.493 | 3         | 0.000673 | 0         | 0.000139 | 0         | 0.000264 | 0        | 0.00101 | 0        | 0.01138 | 0         | 0   | 0    | 0.43 | 0    | 0   | 0     | 0   |
|                             | 13C2075 | 600 °C   | 295.5 | 0        | 0.018 | 35       | 0.1869 | 0        | 1.493 | 3         | 0.000673 | 0         | 0.000139 | 0         | 0.000264 | 0        | 0.00101 | 0        | 0.01138 | 0         | 0   | 0    | 0.43 | 0    | 0   | 0     | 0   |
|                             | 13C2076 | 700 °C   | 295.5 | 0        | 0.018 | 35       | 0.1869 | 0        | 1.493 | 3         | 0.000673 | 0         | 0.000139 | 0         | 0.000264 | 0        | 0.00101 | 0        | 0.01138 | 0         | 0   | 0    | 0.43 | 0    | 0   | 0     | 0   |
|                             | 13C2078 | 800 °C   | 295.5 | 0        | 0.018 | 35       | 0.1869 | 0        | 1.493 | 3         | 0.000673 | 0         | 0.000139 | 0         | 0.000264 | 0        | 0.00101 | 0        | 0.01138 | 0         | 0   | 0    | 0.43 | 0    | 0   | 0     | 0   |
|                             | 13C2079 | 900 °C   | 295.5 | 0        | 0.018 | 35       | 0.1869 | 0        | 1.493 | 3         | 0.000673 | 0         | 0.000139 | 0         | 0.000264 | 0        | 0.00101 | 0        | 0.01138 | 0         | 0   | 0    | 0.43 | 0    | 0   | 0     | 0   |
|                             | 13C2081 | 1050 °C  | 295.5 | 0        | 0.018 | 35       | 0.1869 | 0        | 1.493 | 3         | 0.000673 | 0         | 0.000139 | 0         | 0.000264 | 0        | 0.00101 | 0        | 0.01138 | 0         | 0   | 0    | 0.43 | 0    | 0   | 0     | 0   |
|                             | 13C2082 | 1250 °C  | 295.5 | 0        | 0.018 | 35       | 0.1869 | 0        | 1.493 | 3         | 0.000673 | 0         | 0.000139 | 0         | 0.000264 | 0        | 0.00101 | 0        | 0.01138 | 0         | 0   | 0    | 0.43 | 0    | 0   | 0     | 0   |
|                             | 13C2084 | 1400 °C  | 295.5 | 0        | 0.018 | 35       | 0.1869 | 0        | 1.493 | 3         | 0.000673 | 0         | 0.000139 | 0         | 0.000264 | 0        | 0.00101 | 0        | 0.01138 | 0         | 0   | 0    | 0.43 | 0    | 0   | 0     | 0   |
|                             |         |          |       |          |       |          |        |          |       |           |          |           |          |           |          |          |         |          |         |           |     |      |      |      |     |       |     |



13C2073.AGE >>> 274-2 >>> KERGUELEN PROJECT

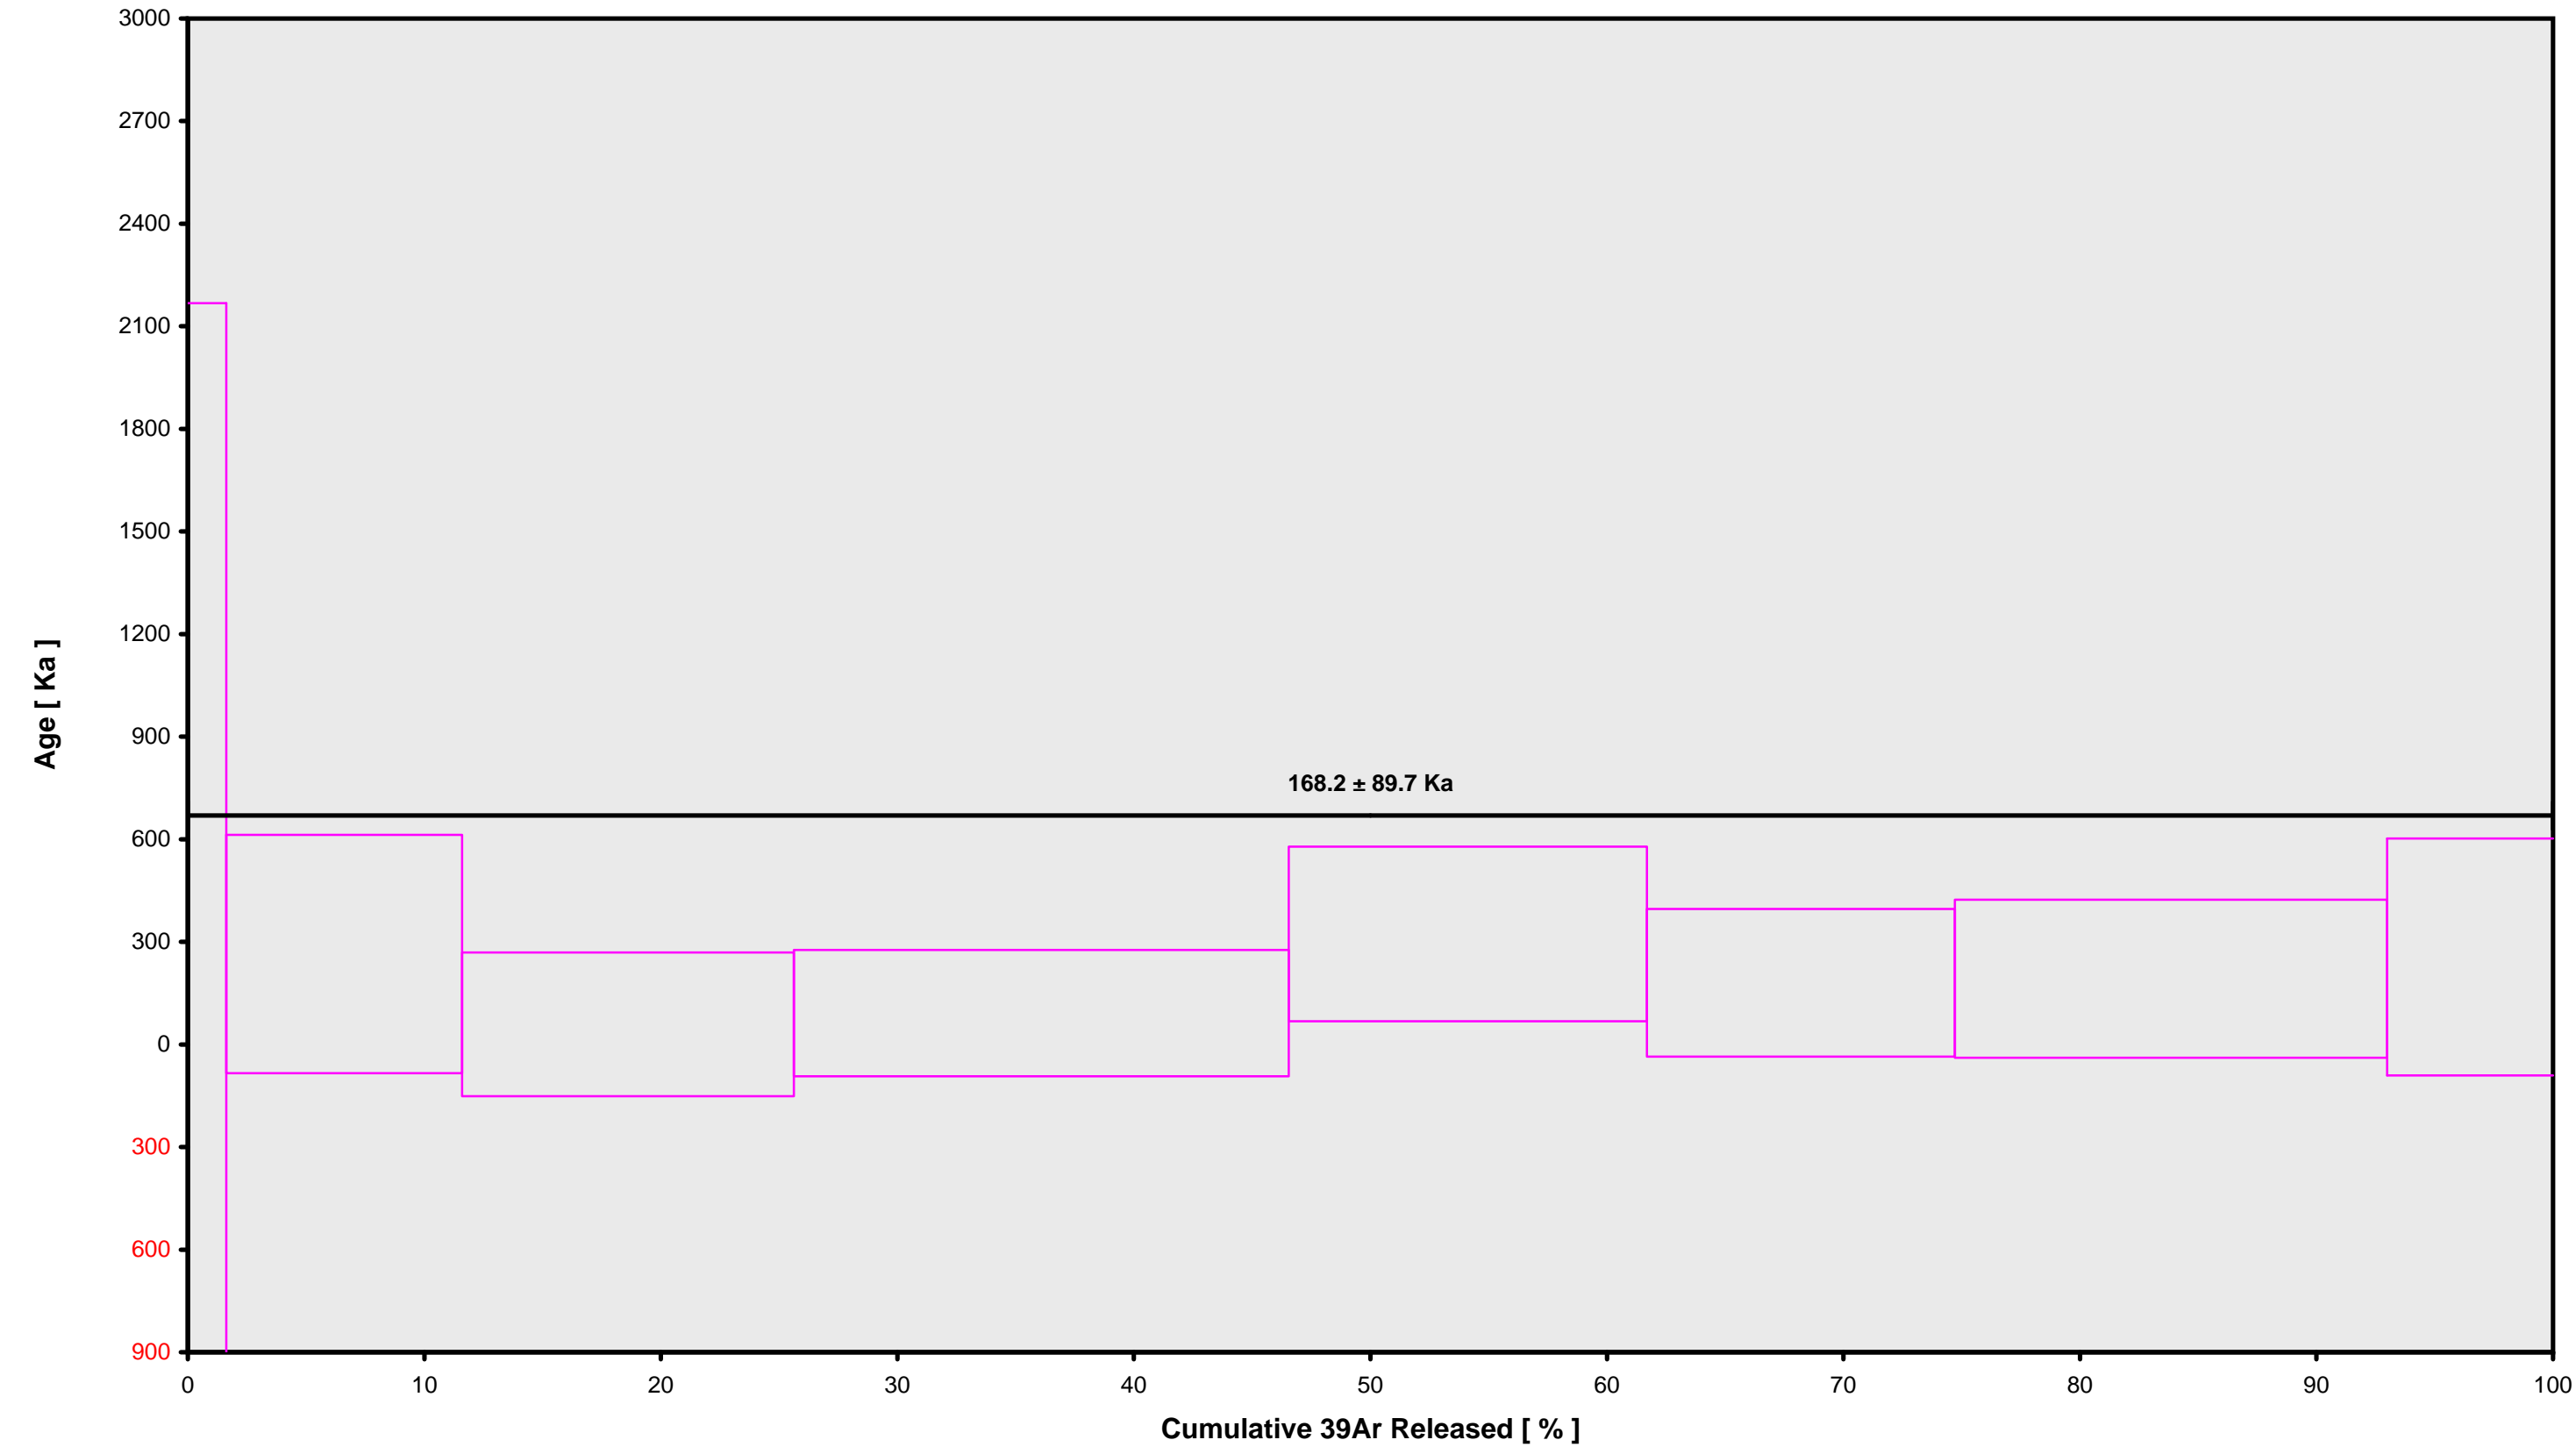

Ar-Ages in Ka

WEIGHTED PLATEAU

168.2 ± 89.7

TOTAL FUSION

187.7 ± 94.6

NORMAL ISOCHRON

80.7 ± 216.7

INVERSE ISOCHRON

93.9 ± 90.4

MSWD (PROBABILITY)

0.58 (77%)

Sample Info

Groundmass

Kerguelen Plateau

Trevor Smith

IRR = OSU2C13

J = 0.00157287 ± 0.00001274

RECALIBRATED AGE



13C2073.AGE >>> 274-2 >>> KERGUELEN PROJECT

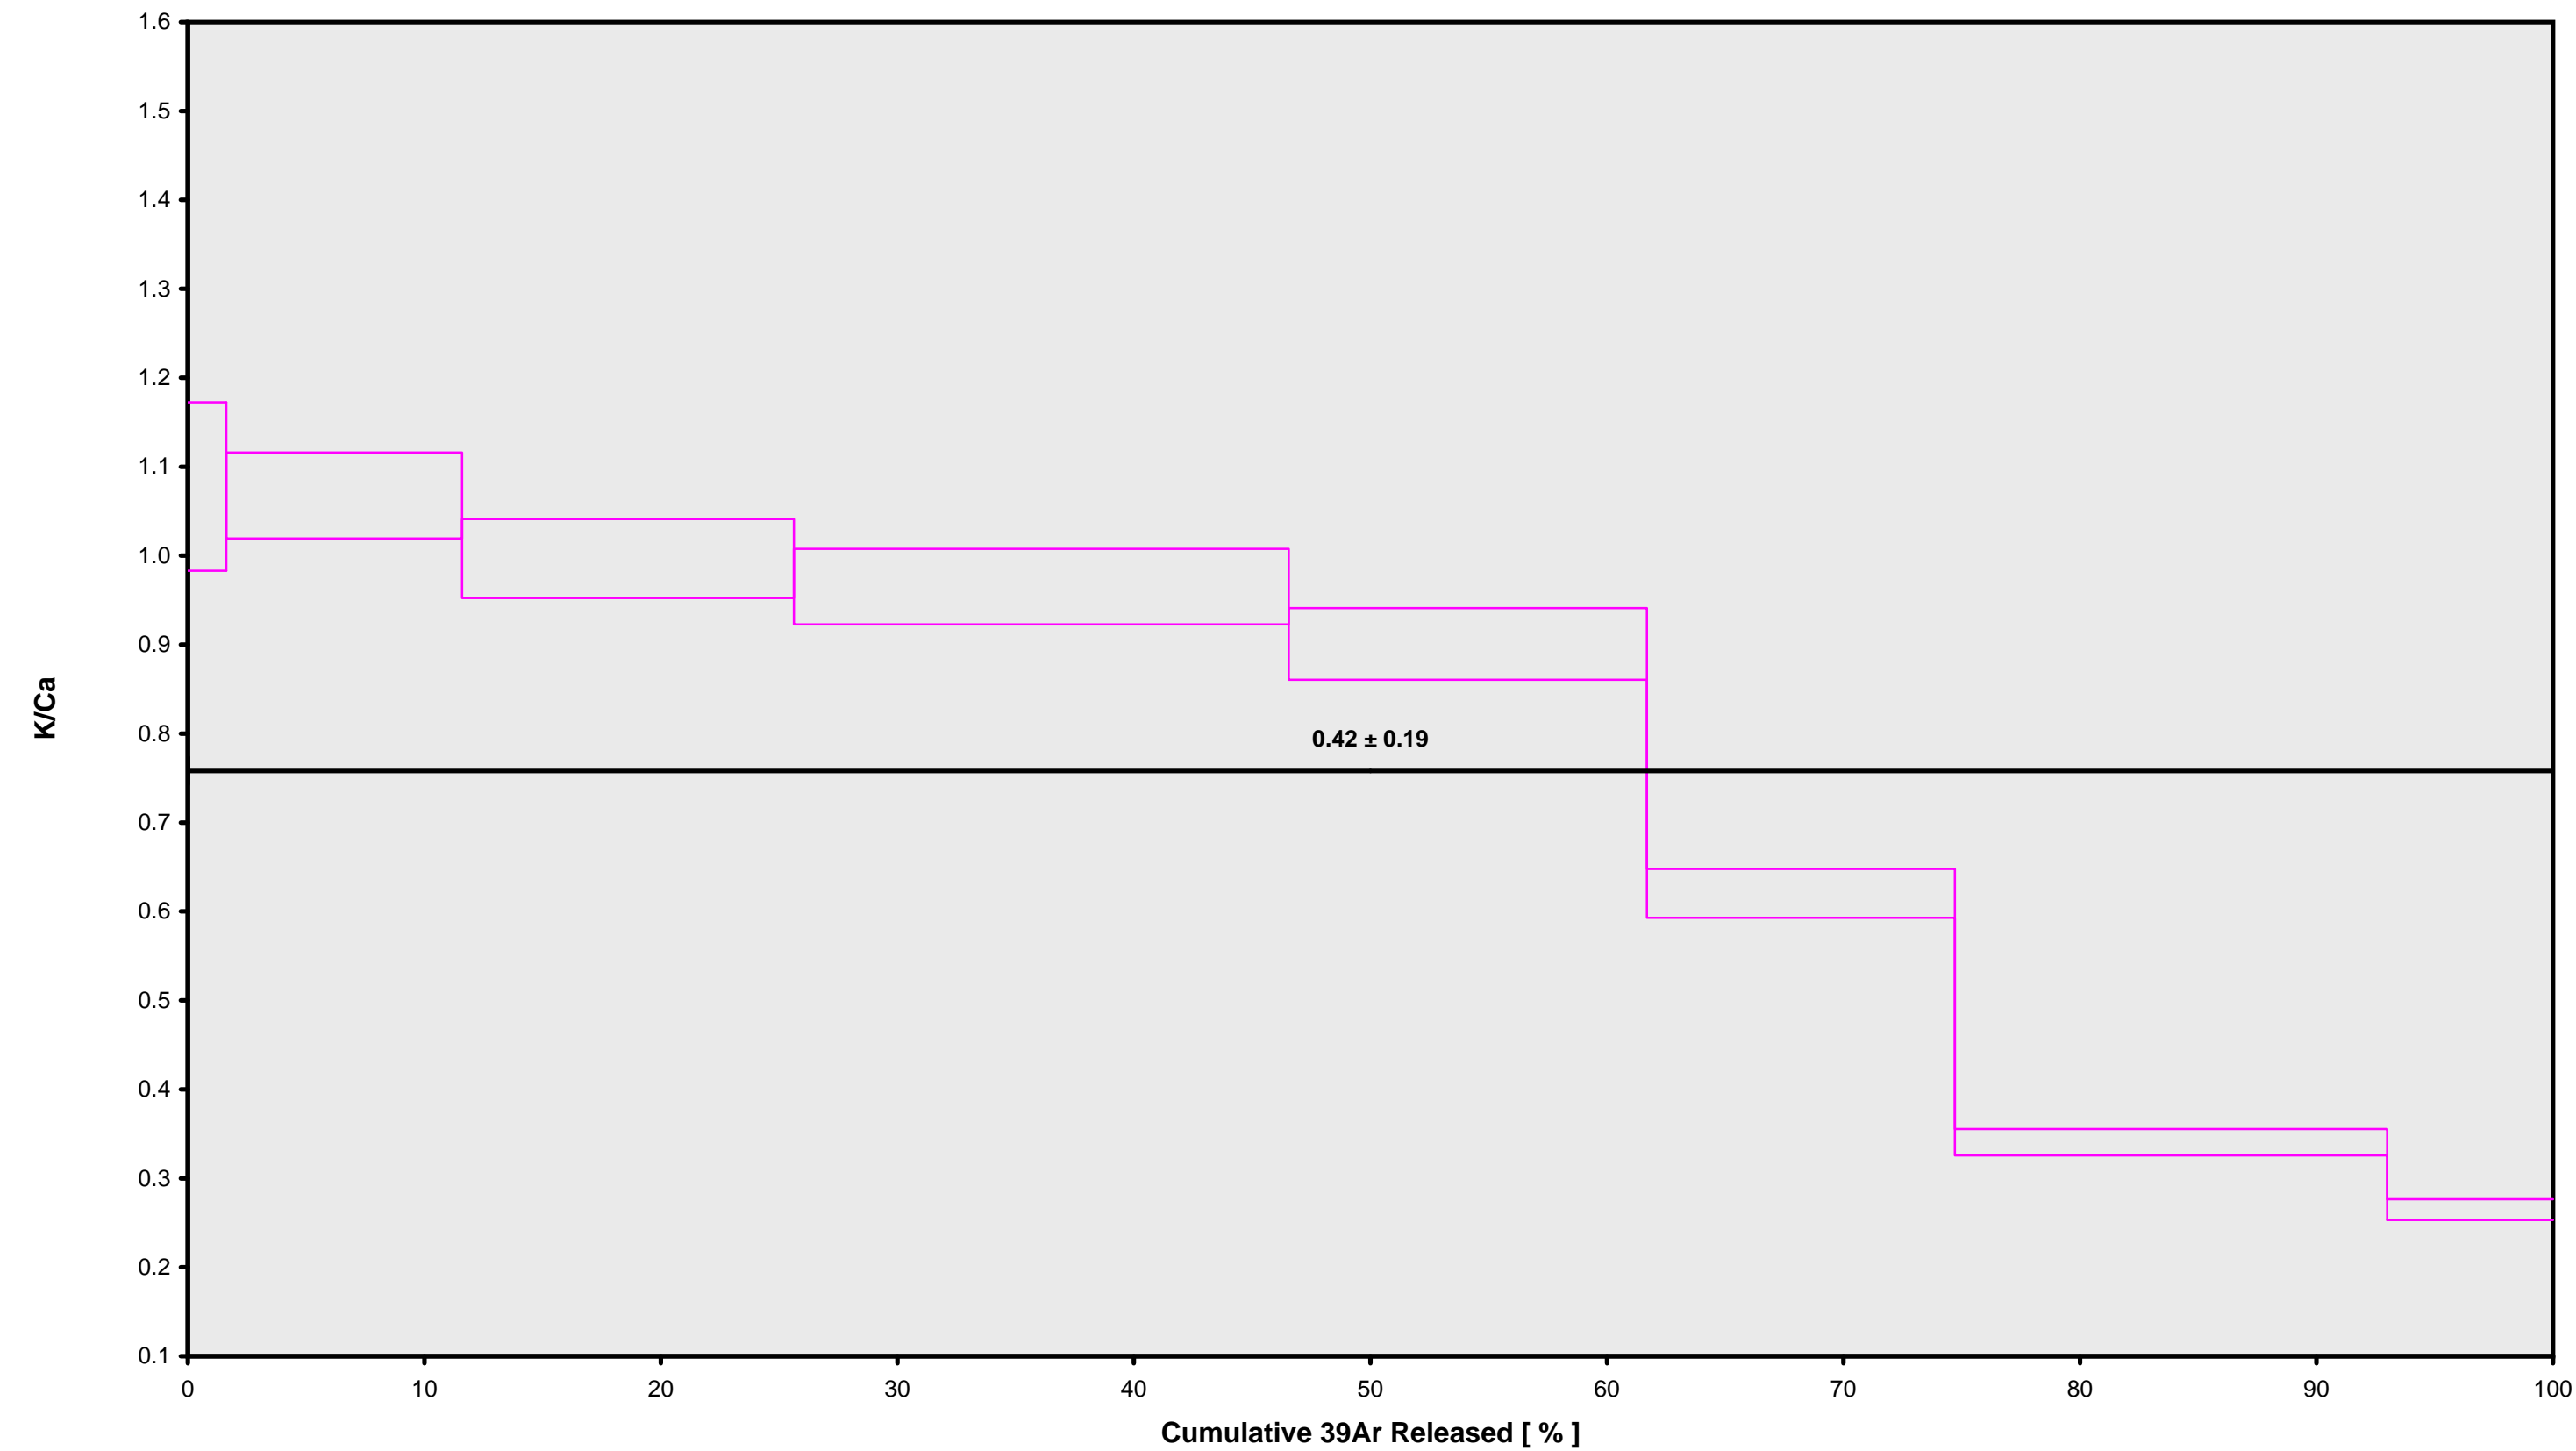

**Ar-Ages in Ka**

**WEIGHTED PLATEAU**

**168.2 ± 89.7**

**TOTAL FUSION**

**187.7 ± 94.6**

**NORMAL ISOCHRON**

**80.7 ± 216.7**

**INVERSE ISOCHRON**

**93.9 ± 90.4**

**Sample Info**

**Groundmass**

**Kerguelen Plateau**

**Trevor Smith**

**IRR = OSU2C13**

**J = 0.00157287 ± 0.00001274**

**RECALIBRATED AGE**



13C2073.AGE >>> 274-2 >>> KERGUELEN PROJECT

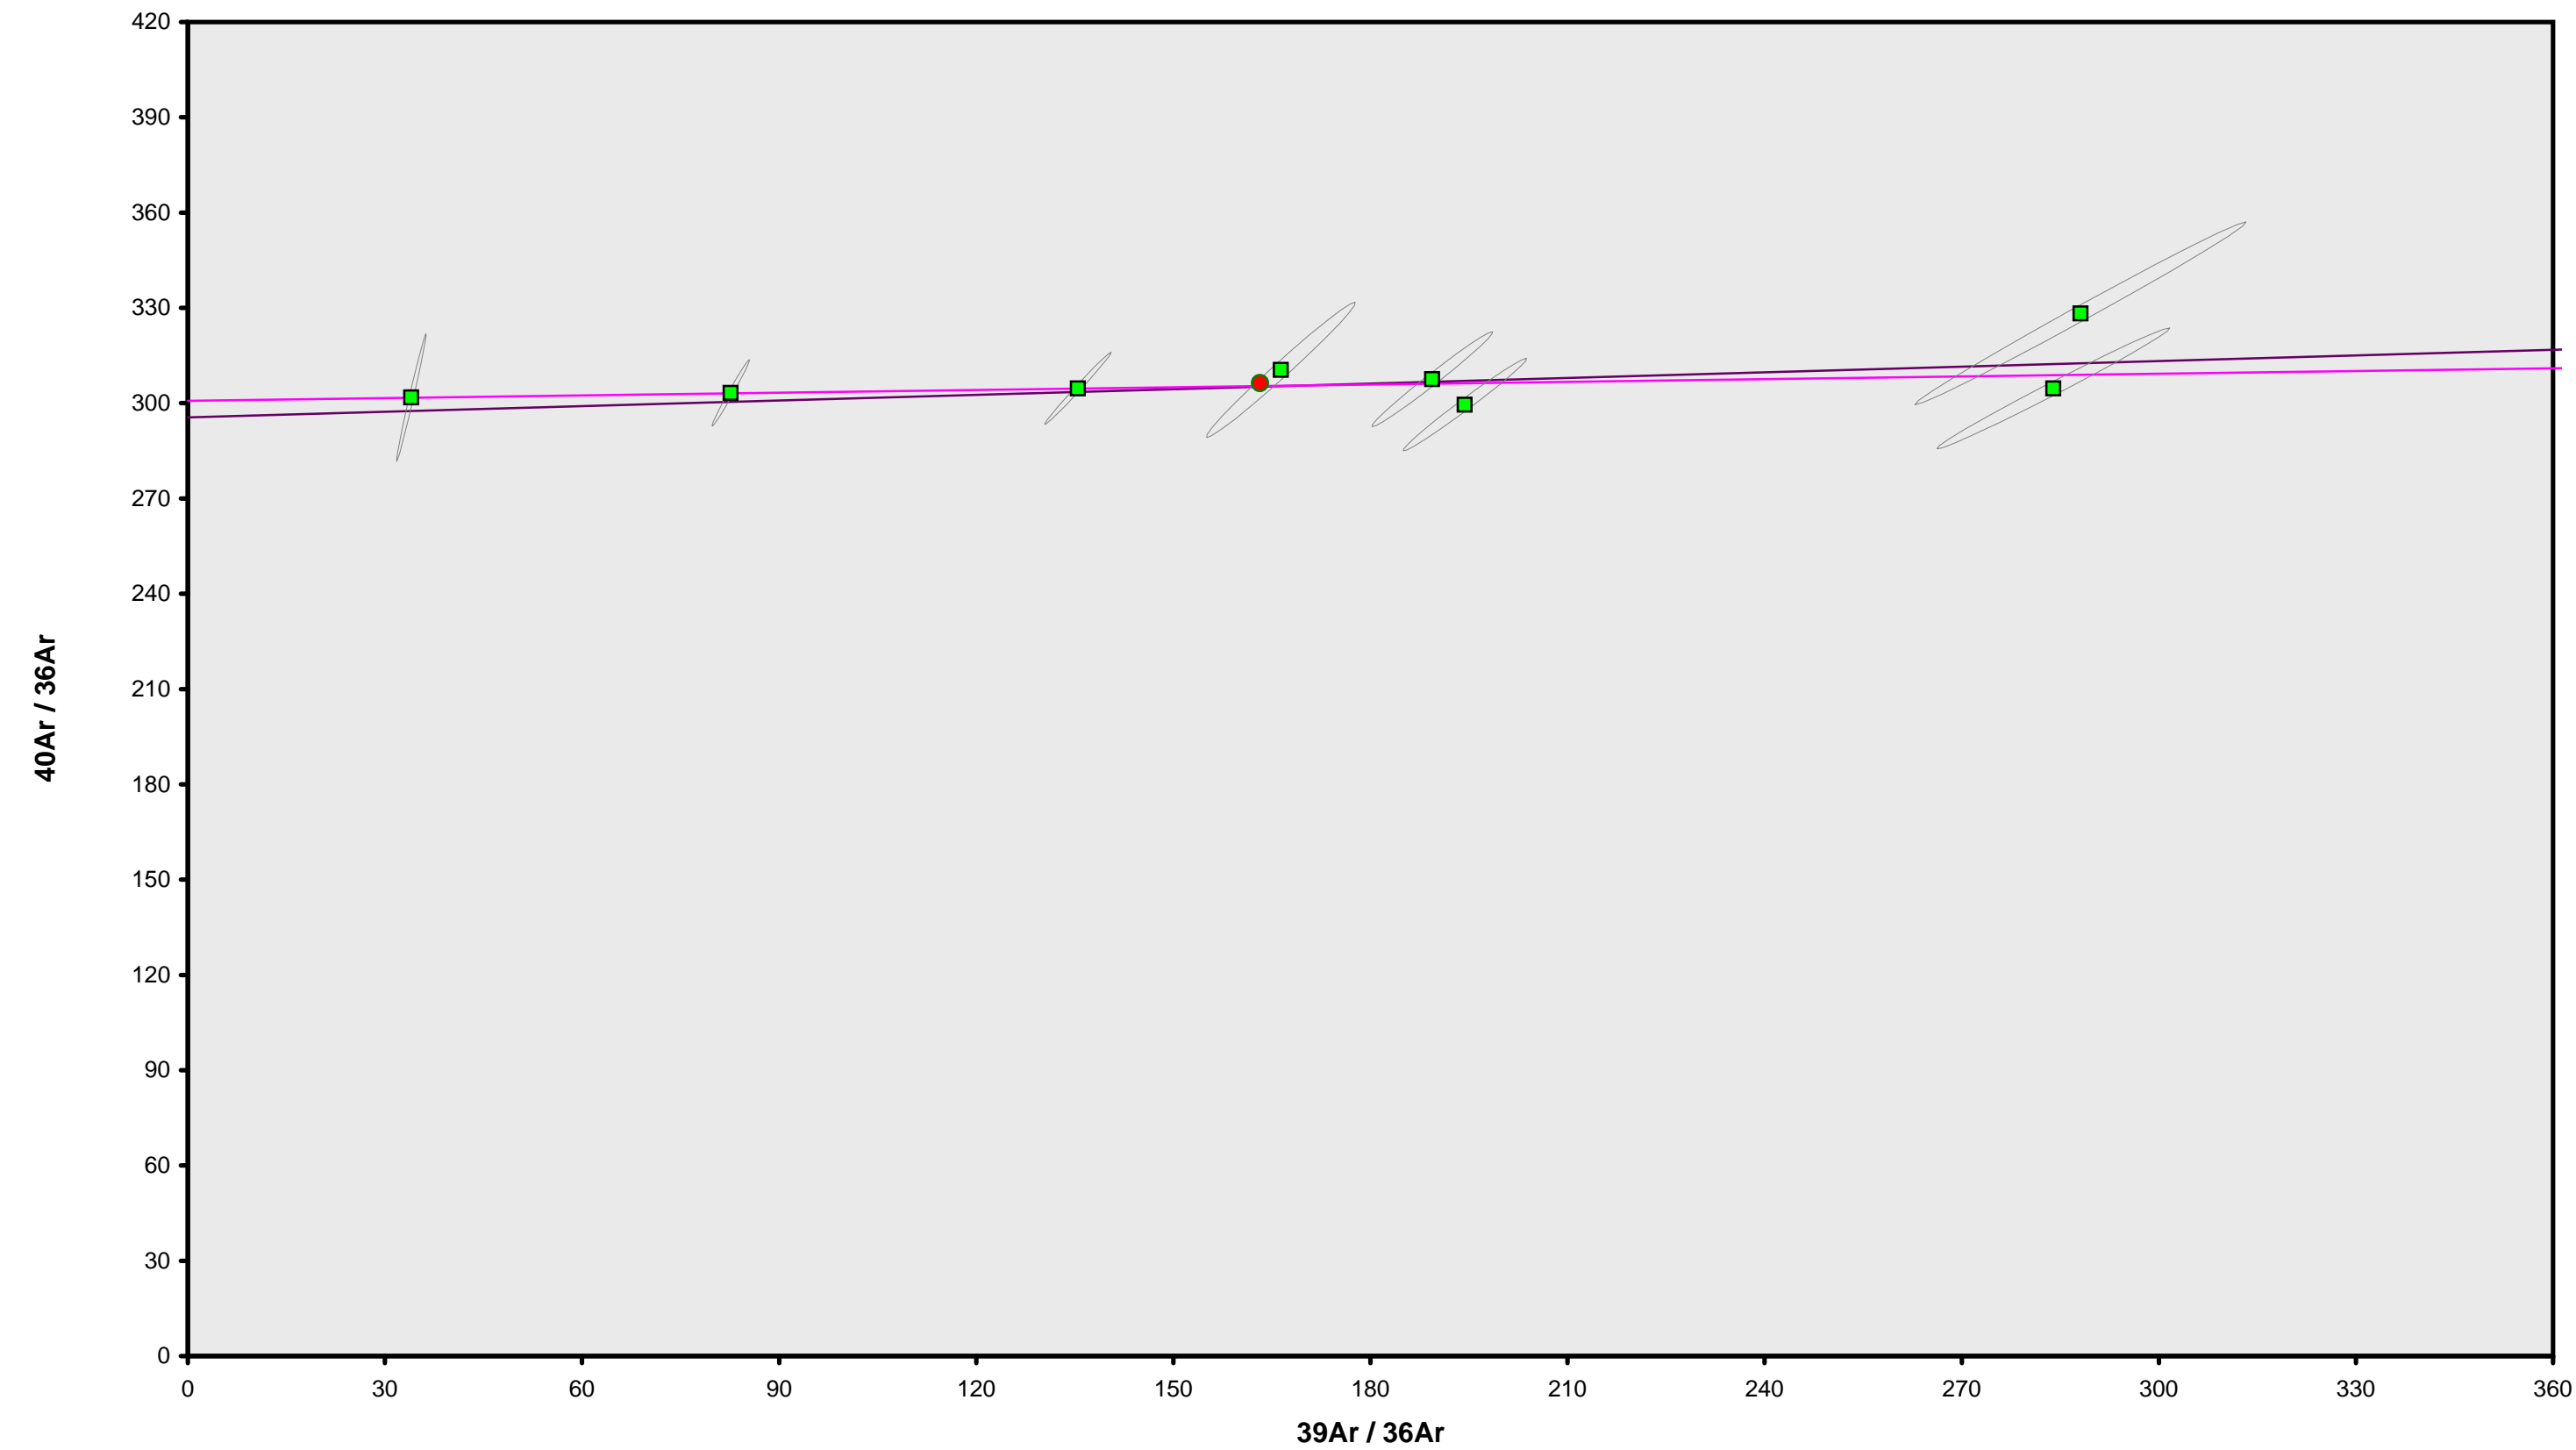

Ar-Ages in Ka

WEIGHTED PLATEAU

168.2  $\pm$  89.7

TOTAL FUSION

187.7  $\pm$  94.6

NORMAL ISOCHRON

80.7  $\pm$  216.7

INVERSE ISOCHRON

93.9  $\pm$  90.4

MSWD (PROBABILITY)

0.54 (78%)

40AR/36AR INTERCEPT

300.7  $\pm$  12.6

Sample Info

Groundmass

Kerguelen Plateau

Trevor Smith

IRR = OSU2C13

J = 0.00157287  $\pm$  0.00001274

RECALIBRATED AGE



13C2073.AGE >>> 274-2 >>> KERGUELEN PROJECT

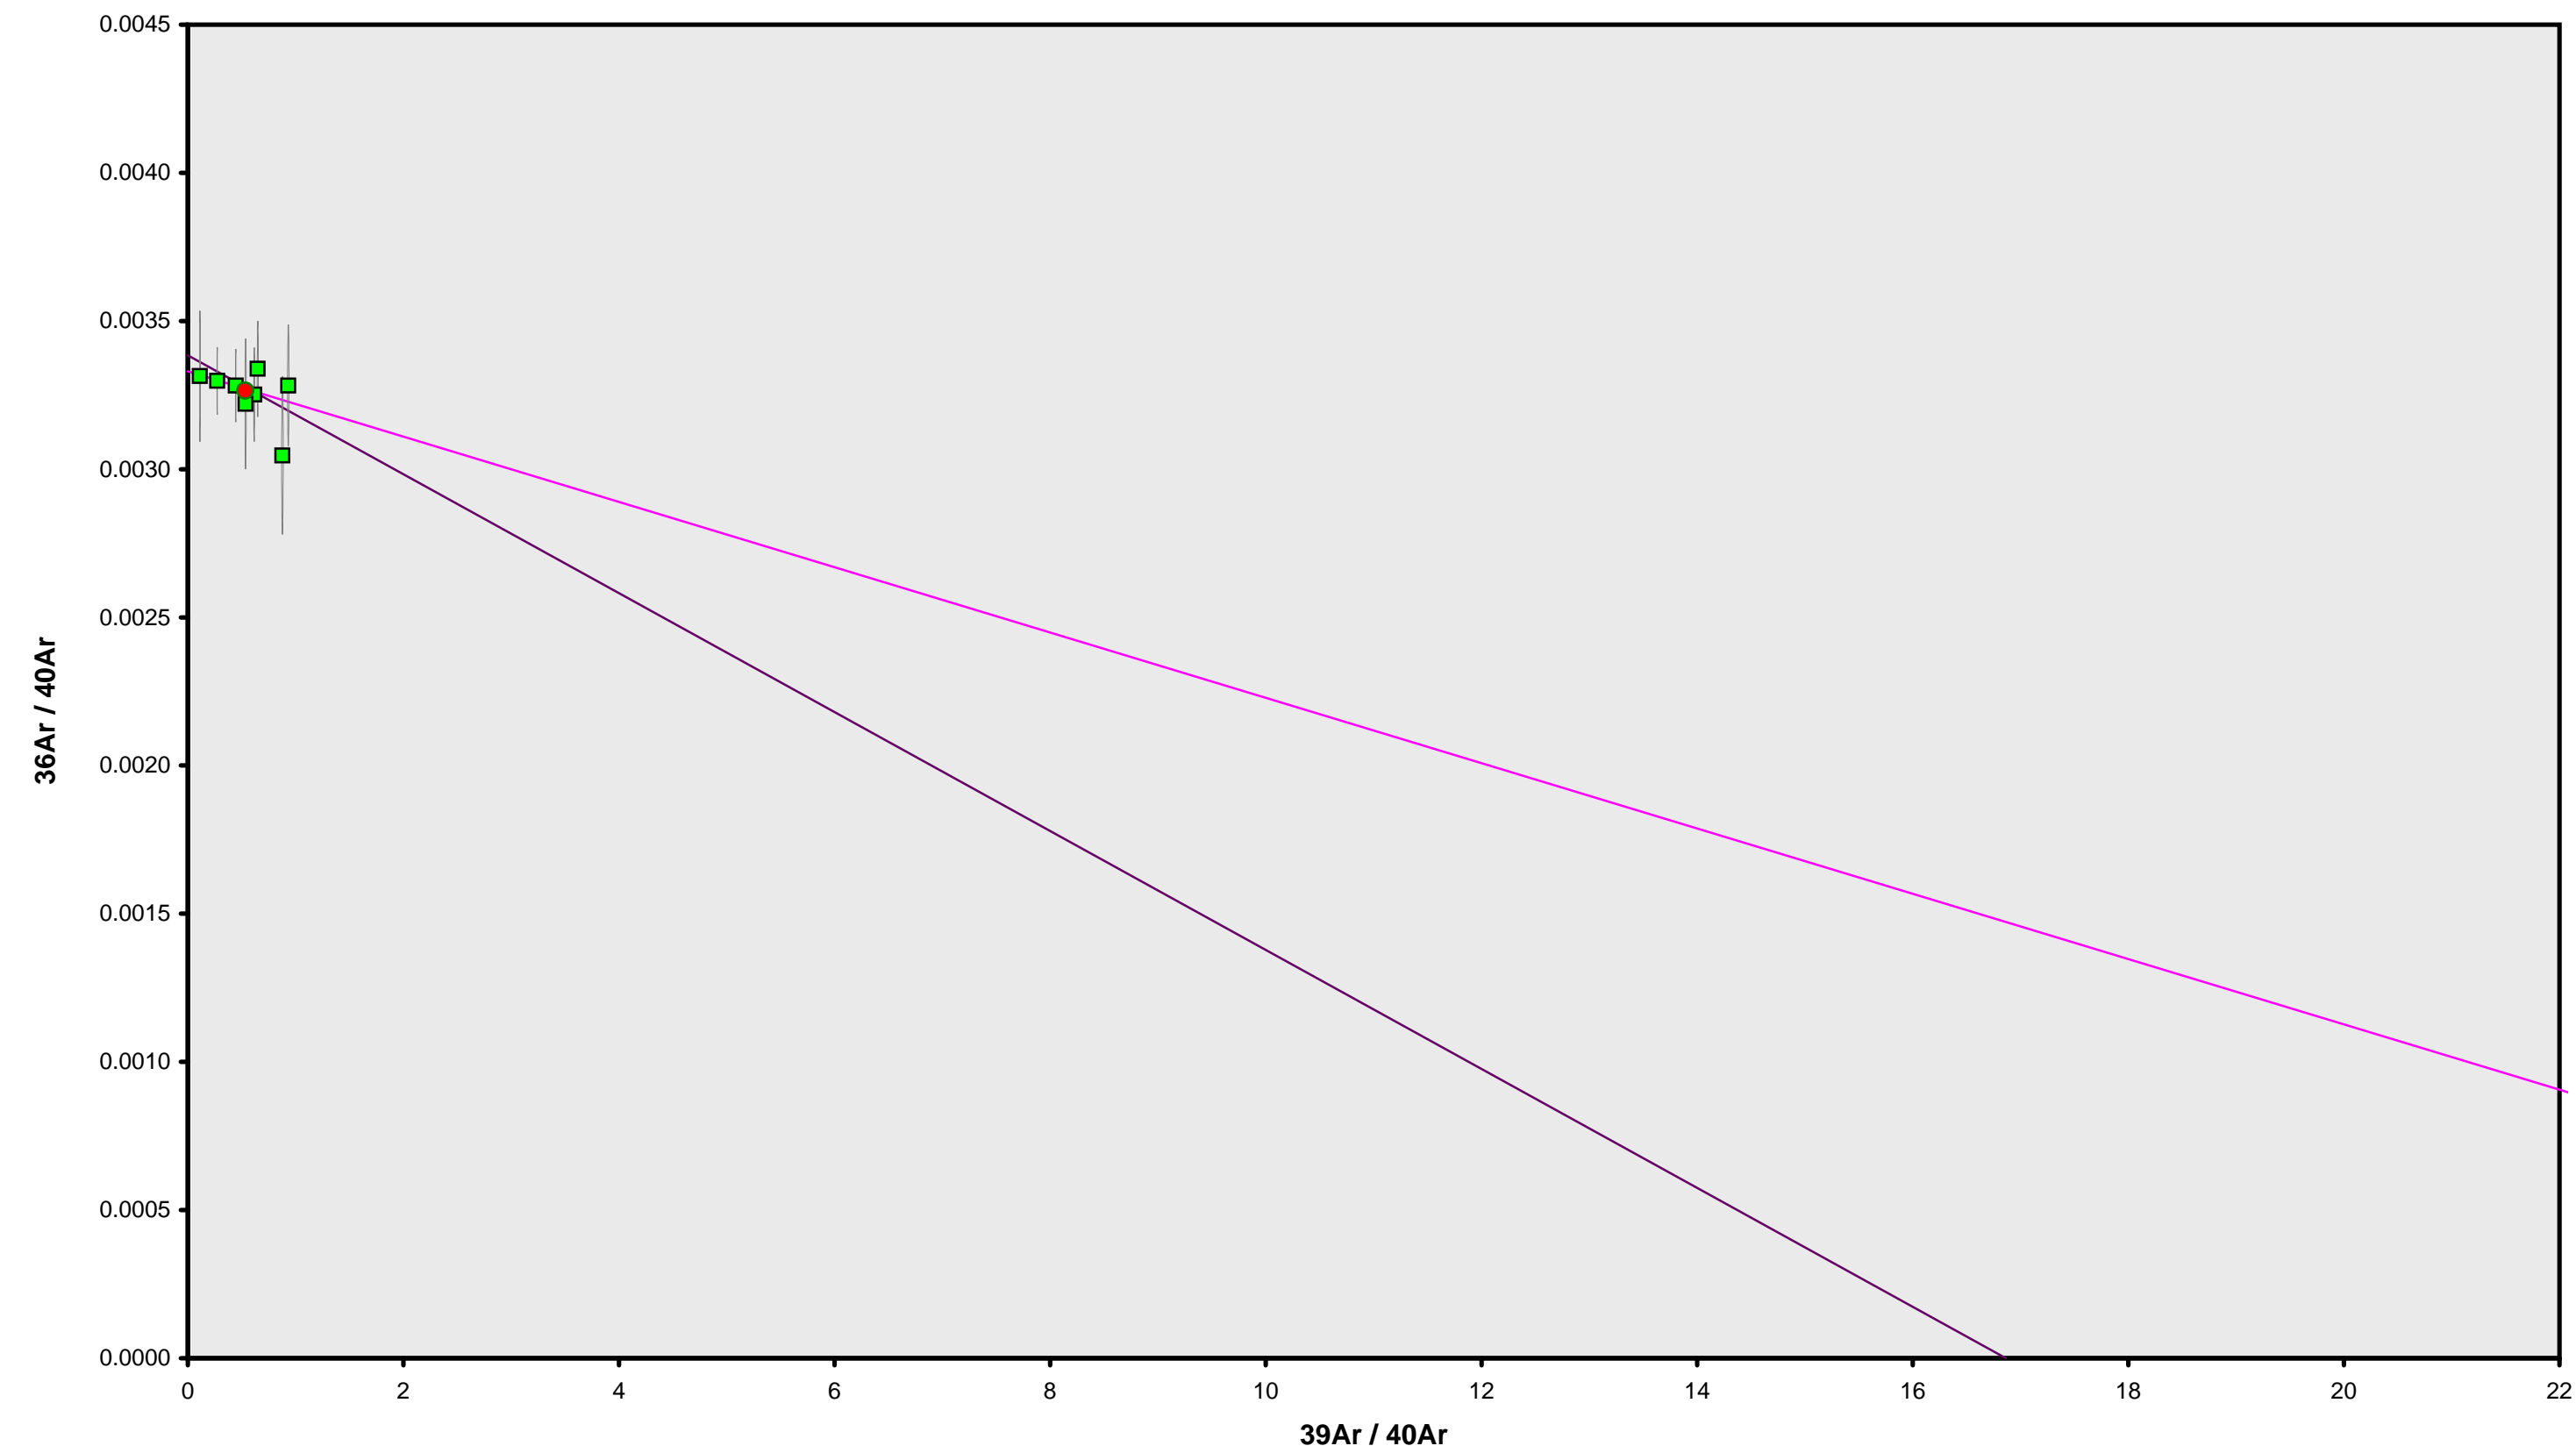

Ar-Ages in Ka

WEIGHTED PLATEAU

168.2 ± 89.7

TOTAL FUSION

187.7 ± 94.6

NORMAL ISOCHRON

80.7 ± 216.7

INVERSE ISOCHRON

93.9 ± 90.4

MSWD (PROBABILITY)

0.57 (75%)

SPREADING FACTOR

2.7%

40AR/36AR INTERCEPT

300.3 ± 12.5

Sample Info

Groundmass

Kerguelen Plateau

Trevor Smith

IRR = OSU2C13

J = 0.00157287 ± 0.00001274

RECALIBRATED AGE



| Incremental Heating |         |   | 36Ar(a)<br>[V] | 37Ar(ca)<br>[V] | 38Ar(cl)<br>[V] | 39Ar(k)<br>[V] | 40Ar(r)<br>[V] | Age ± 2σ<br>(Ma) | 40Ar(r)<br>(%) | 39Ar(k)<br>(%) | K/Ca ± 2σ     |
|---------------------|---------|---|----------------|-----------------|-----------------|----------------|----------------|------------------|----------------|----------------|---------------|
| 13C2060             | 500 °C  | ✓ | 0.0028076      | 0.0061403       | 0.0003588       | 0.0133748      | 0.0033556      | 0.72 ± 2.89      | 0.40           | 1.88           | 0.937 ± 0.084 |
| 13C2062             | 600 °C  | ✓ | 0.0063520      | 0.0166410       | 0.0014383       | 0.0513907      | 0.0160337      | 0.89 ± 0.81      | 0.85           | 7.23           | 1.328 ± 0.068 |
| 13C2063             | 700 °C  | ✓ | 0.0033535      | 0.0191032       | 0.0016253       | 0.0661849      | 0.0178797      | 0.77 ± 0.78      | 1.77           | 9.31           | 1.490 ± 0.069 |
| 13C2065             | 800 °C  | ✓ | 0.0048897      | 0.0306454       | 0.0021315       | 0.0945808      | 0.0406790      | 1.23 ± 0.39      | 2.74           | 13.30          | 1.327 ± 0.063 |
| 13C2066             | 900 °C  | ✓ | 0.0092645      | 0.0418128       | 0.0020257       | 0.0979247      | 0.0528153      | 1.54 ± 0.37      | 1.89           | 13.77          | 1.007 ± 0.044 |
| 13C2068             | 1050 °C | ✓ | 0.0205106      | 0.1498284       | 0.0037100       | 0.1682040      | 0.0913321      | 1.55 ± 0.48      | 1.48           | 23.66          | 0.483 ± 0.021 |
| 13C2069             | 1250 °C | ✓ | 0.0208344      | 0.4017691       | 0.0040072       | 0.1844549      | 0.1072763      | 1.67 ± 0.26      | 1.71           | 25.94          | 0.197 ± 0.009 |
| 13C2071             | 1400 °C | ✓ | 0.0034317      | 0.1117377       | 0.0007176       | 0.0348912      | 0.0146788      | 1.20 ± 1.00      | 1.43           | 4.91           | 0.134 ± 0.006 |
| Σ                   |         |   | 0.0714440      | 0.7776780       | 0.0160144       | 0.7110060      | 0.3440505      |                  |                |                |               |

| Information on Analysis       | Results          | 40(r)/39(k) ± 2σ  | Age ± 2σ (Ma)              | MSWD   | 39Ar(k) (% ,n)      | K/Ca ± 2σ     |
|-------------------------------|------------------|-------------------|----------------------------|--------|---------------------|---------------|
| Sample = 253-12               | Age Plateau      | 0.51090 ± 0.06794 | 1.46 ± 0.19                | 1.40   | 100.00              | 0.200 ± 0.142 |
| Material = Groundmass         | Recalibrated     | ± 13.30%          | ± 13.30%                   | 20%    | 8                   |               |
| Location = Kerguelen Plateau  |                  |                   | Full External Error ± 0.20 | 2.07   | 2σ Confidence Limit |               |
| Analyst = Kyle Krawl          |                  |                   | Analytical Error ± 0.19    | 1.1826 | Error Magnification |               |
| Project = KERGUELEN           |                  |                   |                            |        |                     |               |
| Mass Discrimination Law = LIN | Total Fusion Age | 0.48389 ± 0.06716 | 1.39 ± 0.19                |        | 8                   | 0.393 ± 0.010 |
| Irradiation = OSU2C13         | Recalibrated     | ± 13.88%          | ± 13.88%                   |        |                     |               |
| J = 0.00158793 ± 0.00000405   |                  |                   | Full External Error ± 0.19 |        |                     |               |
| FCT-3 = 28.201 ± 0.023 Ma     |                  |                   | Analytical Error ± 0.19    |        |                     |               |



| Normal Isochron |         |   | 39(k)/36(a) ± 2σ | 40(a+r)/36(a) ± 2σ | r.i.   |
|-----------------|---------|---|------------------|--------------------|--------|
| 13C2060         | 500 °C  | ✓ | 4.76 ± 0.08      | 296.70 ± 4.83      | 0.9007 |
| 13C2062         | 600 °C  | ✓ | 8.09 ± 0.06      | 298.02 ± 2.30      | 0.8863 |
| 13C2063         | 700 °C  | ✓ | 19.74 ± 0.36     | 300.83 ± 5.46      | 0.9716 |
| 13C2065         | 800 °C  | ✓ | 19.34 ± 0.16     | 303.82 ± 2.68      | 0.9256 |
| 13C2066         | 900 °C  | ✓ | 10.57 ± 0.05     | 301.20 ± 1.39      | 0.7522 |
| 13C2068         | 1050 °C | ✓ | 8.20 ± 0.04      | 299.95 ± 1.40      | 0.9343 |
| 13C2069         | 1250 °C | ✓ | 8.85 ± 0.03      | 300.65 ± 0.82      | 0.5867 |
| 13C2071         | 1400 °C | ✓ | 10.17 ± 0.12     | 299.78 ± 3.59      | 0.9157 |

| Results                                               | 40(a)/36(a) ± 2σ                                                    | 40(r)/39(k) ± 2σ              | Age ± 2σ (Ma)                                          | MSWD                                   |
|-------------------------------------------------------|---------------------------------------------------------------------|-------------------------------|--------------------------------------------------------|----------------------------------------|
| Normal Isochron<br>Recalibrated                       | 297.44 ± 2.28<br>± 0.77%                                            | 0.32237 ± 0.22879<br>± 70.97% | 0.92 ± 0.66<br>± 70.95%                                | 1.10<br>36%                            |
| Full External Error ± 0.66<br>Analytical Error ± 0.66 |                                                                     |                               |                                                        |                                        |
| Statistics                                            | 2σ Confidence Limit<br>Error Magnification<br>Number of Data Points | 2.15<br>1.0510<br>8           | Convergence<br>Number of Iterations<br>Calculated Line | 0.000000000112<br>5<br>Weighted York-2 |



| Inverse Isochron |         |   | 39(k)/40(a+r) ± 2σ    | 36(a)/40(a+r) ± 2σ      | r.i.   |
|------------------|---------|---|-----------------------|-------------------------|--------|
| 13C2060          | 500 °C  | ✓ | 0.0160560 ± 0.0001208 | 0.00337046 ± 0.00005490 | 0.1024 |
| 13C2062          | 600 °C  | ✓ | 0.0271472 ± 0.0000984 | 0.00335543 ± 0.00002587 | 0.3055 |
| 13C2063          | 700 °C  | ✓ | 0.0656049 ± 0.0002844 | 0.00332412 ± 0.00006030 | 0.1002 |
| 13C2065          | 800 °C  | ✓ | 0.0636659 ± 0.0002138 | 0.00329143 ± 0.00002906 | 0.2830 |
| 13C2066          | 900 °C  | ✓ | 0.0350925 ± 0.0001166 | 0.00332004 ± 0.00001531 | 0.2980 |
| 13C2068          | 1050 °C | ✓ | 0.0273403 ± 0.0000469 | 0.00333386 ± 0.00001559 | 0.1255 |
| 13C2069          | 1250 °C | ✓ | 0.0294475 ± 0.0000824 | 0.00332614 ± 0.00000912 | 0.2856 |
| 13C2071          | 1400 °C | ✓ | 0.0339167 ± 0.0001690 | 0.00333581 ± 0.00003991 | 0.1478 |

| Results          | 40(a)/36(a) ± 2σ      |        | 40(r)/39(k) ± 2σ     |                            | Age ± 2σ (Ma)   | MSWD |
|------------------|-----------------------|--------|----------------------|----------------------------|-----------------|------|
| Inverse Isochron | 297.44 ± 2.27         |        | 0.32282 ± 0.17168    |                            | 0.92 ± 0.49     | 1.09 |
| Clustered Points | ± 0.76%               |        | ± 53.18%             |                            | ± 53.17%        | 36%  |
|                  |                       |        |                      | Full External Error ± 0.49 |                 |      |
|                  |                       |        |                      | Analytical Error ± 0.49    |                 |      |
| Statistics       | 2σ Confidence Limit   | 2.15   | Convergence          |                            | 0.0000029243    |      |
|                  | Error Magnification   | 1.0446 | Number of Iterations |                            | 4               |      |
|                  | Number of Data Points | 8      | Calculated Line      |                            | Weighted York-2 |      |
|                  | Spreading Factor      | 1.6%   |                      |                            |                 |      |



| OSU Argon Geochronology Lab |         |   |          |           |           |           |           |           |           |           |           |           |                   |               |             |             |               |
|-----------------------------|---------|---|----------|-----------|-----------|-----------|-----------|-----------|-----------|-----------|-----------|-----------|-------------------|---------------|-------------|-------------|---------------|
| Relative Abundances         |         |   | 40Ar     |           | 39Ar      |           | 38Ar      |           | 37Ar      |           | 36Ar      |           | 40(r)/39(k) ± 2σ  | Age ± 2σ (Ma) | 40Ar(r) (%) | 39Ar(k) (%) | K/Ca ± 2σ     |
|                             |         |   | [V]      | 1σ        | [V]       | 1σ        | [V]       | 1σ        | [V]       | 1σ        | [V]       | 1σ        |                   |               |             |             |               |
| 13C2060                     | 500 °C  | ✓ | 0.833023 | 0.0014752 | 0.0133789 | 0.0000444 | 0.0010366 | 0.0000315 | 0.0061403 | 0.0002743 | 0.0028093 | 0.0000223 | 0.25089 ± 1.01055 | 0.72 ± 2.89   | 0.40        | 1.88        | 0.937 ± 0.084 |
| 13C2062                     | 600 °C  | ✓ | 1.893089 | 0.0027653 | 0.0514019 | 0.0000551 | 0.0032126 | 0.0000260 | 0.0166410 | 0.0004282 | 0.0063567 | 0.0000227 | 0.31200 ± 0.28197 | 0.89 ± 0.81   | 0.85        | 7.23        | 1.328 ± 0.068 |
| 13C2063                     | 700 °C  | ✓ | 1.008907 | 0.0014161 | 0.0661977 | 0.0001093 | 0.0030079 | 0.0000406 | 0.0191032 | 0.0004444 | 0.0033589 | 0.0000301 | 0.27015 ± 0.27174 | 0.77 ± 0.78   | 1.77        | 9.31        | 1.490 ± 0.069 |
| 13C2065                     | 800 °C  | ✓ | 1.485677 | 0.0021515 | 0.0946015 | 0.0000803 | 0.0041259 | 0.0000274 | 0.0306454 | 0.0007296 | 0.0048982 | 0.0000204 | 0.43010 ± 0.13527 | 1.23 ± 0.39   | 2.74        | 13.30       | 1.327 ± 0.063 |
| 13C2066                     | 900 °C  | ✓ | 2.790572 | 0.0029811 | 0.0979528 | 0.0001246 | 0.0048774 | 0.0000293 | 0.0418128 | 0.0009211 | 0.0092760 | 0.0000189 | 0.53935 ± 0.12945 | 1.54 ± 0.37   | 1.89        | 13.77       | 1.007 ± 0.044 |
| 13C2068                     | 1050 °C | ✓ | 6.152397 | 0.0030860 | 0.1683049 | 0.0001170 | 0.0094784 | 0.0000228 | 0.1498284 | 0.0032390 | 0.0205510 | 0.0000468 | 0.54298 ± 0.16857 | 1.55 ± 0.48   | 1.48        | 23.66       | 0.483 ± 0.021 |
| 13C2069                     | 1250 °C | ✓ | 6.264038 | 0.0046363 | 0.1847253 | 0.0002189 | 0.0100561 | 0.0000299 | 0.4017691 | 0.0087093 | 0.0209413 | 0.0000239 | 0.58159 ± 0.09201 | 1.67 ± 0.26   | 1.71        | 25.94       | 0.197 ± 0.009 |
| 13C2071                     | 1400 °C | ✓ | 1.028768 | 0.0015268 | 0.0349664 | 0.0000698 | 0.0017716 | 0.0000312 | 0.1117377 | 0.0024175 | 0.0034613 | 0.0000199 | 0.42070 ± 0.34807 | 1.20 ± 1.00   | 1.43        | 4.91        | 0.134 ± 0.006 |

|   |  |  |           |           |           |           |           |           |           |           |           |           |  |  |  |  |
|---|--|--|-----------|-----------|-----------|-----------|-----------|-----------|-----------|-----------|-----------|-----------|--|--|--|--|
| Σ |  |  | 21.456471 | 0.0076612 | 0.7115294 | 0.0003247 | 0.0375666 | 0.0000855 | 0.7776780 | 0.0096966 | 0.0716527 | 0.0000765 |  |  |  |  |
|---|--|--|-----------|-----------|-----------|-----------|-----------|-----------|-----------|-----------|-----------|-----------|--|--|--|--|

| Information on Analysis and Constants Used in Calculations |                                                                 | Results          |                  |               |      |               |           |  |
|------------------------------------------------------------|-----------------------------------------------------------------|------------------|------------------|---------------|------|---------------|-----------|--|
|                                                            |                                                                 | 40(a)/36(a) ± 2σ | 40(r)/39(k) ± 2σ | Age ± 2σ (Ma) | MSWD | 39Ar(k) (%.n) | K/Ca ± 2σ |  |
| Sample = 253-12                                            | Age Equations = Min et al. (2000)                               |                  |                  |               |      |               |           |  |
| Material = Groundmass                                      | Negative Intensities = Allowed                                  |                  |                  |               |      |               |           |  |
| Location = Kerguelen Plateau                               | Decay Constant 40K = 5.543 ± 0.044 E-10 1/a                     |                  |                  |               |      |               |           |  |
| Analyst = Kyle Krawl                                       | Decay Constant 39Ar = 2.940 ± 0.029 E-07 1/h                    |                  |                  |               |      |               |           |  |
| Project = KERGUELEN                                        | Decay Constant 37Ar = 8.230 ± 0.082 E-04 1/h                    |                  |                  |               |      |               |           |  |
| Mass Discrimination Law = LIN                              | Decay Constant 36Cl = 2.236 ± 0.045 E-06 1/a                    |                  |                  |               |      |               |           |  |
| Irradiation = OSU2C13                                      | Decay Constant 40K(EC,β <sup>+</sup> ) = 0.580 ± 0.009 E-10 1/a |                  |                  |               |      |               |           |  |
| J = 0.00158793 ± 0.00000405                                | Decay Constant 40K(β <sup>-</sup> ) = 4.950 ± 0.043 E-10 1/a    |                  |                  |               |      |               |           |  |
| FCT-3 = 28.201 ± 0.023 Ma                                  | Atmospheric Ratio 40/36(a) = 295.50                             |                  |                  |               |      |               |           |  |
| IGSN = Undefined                                           | Atmospheric Ratio 38/36(a) = 0.1869                             |                  |                  |               |      |               |           |  |
| Preferred Age = Undefined                                  | Production Ratio 39/37(ca) = 0.000673                           |                  |                  |               |      |               |           |  |
| Classification = Undefined                                 | Production Ratio 38/37(ca) = 0.000139                           |                  |                  |               |      |               |           |  |
| Experiment Type = Undefined                                | Production Ratio 36/37(ca) = 0.000264                           |                  |                  |               |      |               |           |  |
| Extraction Method = Undefined                              | Production Ratio 40/39(k) = 0.001010                            |                  |                  |               |      |               |           |  |
| Heating = 0 sec                                            | Production Ratio 38/39(k) = 0.011380                            |                  |                  |               |      |               |           |  |
| Isolation = 15.00 min                                      | Production Ratio 36/38(cl) = 316.00 ± 15.80                     |                  |                  |               |      |               |           |  |
| Instrument = MAP215-50                                     | Scaling Ratio K/Ca = 0.430                                      |                  |                  |               |      |               |           |  |
| Lithology = Undefined                                      | Abundance Ratio 40K/K = 1.1700 ± 0.0199 E-04                    |                  |                  |               |      |               |           |  |
| Lat-Lon = Undefined - Undefined                            | Atomic Weight K = 39.0983 ± 0.0001 g                            |                  |                  |               |      |               |           |  |
| R1 ratio = Undefined                                       | Recalibrated to FCT-3 Secondary Standard                        |                  |                  |               |      |               |           |  |
| R2 ratio = Undefined                                       | Standard Age = 28.201 ± 0.023 Ma                                |                  |                  |               |      |               |           |  |
| R3 ratio = Undefined                                       |                                                                 |                  |                  |               |      |               |           |  |
| R4 ratio = Undefined                                       |                                                                 |                  |                  |               |      |               |           |  |
| R5 ratio = Undefined                                       |                                                                 |                  |                  |               |      |               |           |  |
| Collector Calibrations =                                   |                                                                 |                  |                  |               |      |               |           |  |
|                                                            |                                                                 |                  |                  |               |      |               |           |  |
|                                                            |                                                                 |                  |                  |               |      |               |           |  |
|                                                            |                                                                 |                  |                  |               |      |               |           |  |
|                                                            |                                                                 |                  |                  |               |      |               |           |  |
|                                                            |                                                                 |                  |                  |               |      |               |           |  |
|                                                            |                                                                 |                  |                  |               |      |               |           |  |
|                                                            |                                                                 |                  |                  |               |      |               |           |  |
|                                                            |                                                                 |                  |                  |               |      |               |           |  |
|                                                            |                                                                 |                  |                  |               |      |               |           |  |
|                                                            |                                                                 |                  |                  |               |      |               |           |  |
|                                                            |                                                                 |                  |                  |               |      |               |           |  |
|                                                            |                                                                 |                  |                  |               |      |               |           |  |
|                                                            |                                                                 |                  |                  |               |      |               |           |  |
|                                                            |                                                                 |                  |                  |               |      |               |           |  |
|                                                            |                                                                 |                  |                  |               |      |               |           |  |
|                                                            |                                                                 |                  |                  |               |      |               |           |  |
|                                                            |                                                                 |                  |                  |               |      |               |           |  |
|                                                            |                                                                 |                  |                  |               |      |               |           |  |
|                                                            |                                                                 |                  |                  |               |      |               |           |  |
|                                                            |                                                                 |                  |                  |               |      |               |           |  |
|                                                            |                                                                 |                  |                  |               |      |               |           |  |
|                                                            |                                                                 |                  |                  |               |      |               |           |  |
|                                                            |                                                                 |                  |                  |               |      |               |           |  |
|                                                            |                                                                 |                  |                  |               |      |               |           |  |
|                                                            |                                                                 |                  |                  |               |      |               |           |  |
|                                                            |                                                                 |                  |                  |               |      |               |           |  |
|                                                            |                                                                 |                  |                  |               |      |               |           |  |
|                                                            |                                                                 |                  |                  |               |      |               |           |  |
|                                                            |                                                                 |                  |                  |               |      |               |           |  |
|                                                            |                                                                 |                  |                  |               |      |               |           |  |
|                                                            |                                                                 |                  |                  |               |      |               |           |  |
|                                                            |                                                                 |                  |                  |               |      |               |           |  |
|                                                            |                                                                 |                  |                  |               |      |               |           |  |
|                                                            |                                                                 |                  |                  |               |      |               |           |  |
|                                                            |                                                                 |                  |                  |               |      |               |           |  |
|                                                            |                                                                 |                  |                  |               |      |               |           |  |
|                                                            |                                                                 |                  |                  |               |      |               |           |  |
|                                                            |                                                                 |                  |                  |               |      |               |           |  |
|                                                            |                                                                 |                  |                  |               |      |               |           |  |
|                                                            |                                                                 |                  |                  |               |      |               |           |  |
|                                                            |                                                                 |                  |                  |               |      |               |           |  |
|                                                            |                                                                 |                  |                  |               |      |               |           |  |
|                                                            |                                                                 |                  |                  |               |      |               |           |  |
|                                                            |                                                                 |                  |                  |               |      |               |           |  |
|                                                            |                                                                 |                  |                  |               |      |               |           |  |
|                                                            |                                                                 |                  |                  |               |      |               |           |  |
|                                                            |                                                                 |                  |                  |               |      |               |           |  |
|                                                            |                                                                 |                  |                  |               |      |               |           |  |
|                                                            |                                                                 |                  |                  |               |      |               |           |  |
|                                                            |                                                                 |                  |                  |               |      |               |           |  |
|                                                            |                                                                 |                  |                  |               |      |               |           |  |
|                                                            |                                                                 |                  |                  |               |      |               |           |  |
|                                                            |                                                                 |                  |                  |               |      |               |           |  |
|                                                            |                                                                 |                  |                  |               |      |               |           |  |
|                                                            |                                                                 |                  |                  |               |      |               |           |  |
|                                                            |                                                                 |                  |                  |               |      |               |           |  |
|                                                            |                                                                 |                  |                  |               |      |               |           |  |
|                                                            |                                                                 |                  |                  |               |      |               |           |  |
|                                                            |                                                                 |                  |                  |               |      |               |           |  |
|                                                            |                                                                 |                  |                  |               |      |               |           |  |
|                                                            |                                                                 |                  |                  |               |      |               |           |  |
|                                                            |                                                                 |                  |                  |               |      |               |           |  |
|                                                            |                                                                 |                  |                  |               |      |               |           |  |
|                                                            |                                                                 |                  |                  |               |      |               |           |  |
|                                                            |                                                                 |                  |                  |               |      |               |           |  |
|                                                            |                                                                 |                  |                  |               |      |               |           |  |
|                                                            |                                                                 |                  |                  |               |      |               |           |  |
|                                                            |                                                                 |                  |                  |               |      |               |           |  |
|                                                            |                                                                 |                  |                  |               |      |               |           |  |
|                                                            |                                                                 |                  |                  |               |      |               |           |  |
|                                                            |                                                                 |                  |                  |               |      |               |           |  |
|                                                            |                                                                 |                  |                  |               |      |               |           |  |
|                                                            |                                                                 |                  |                  |               |      |               |           |  |
|                                                            |                                                                 |                  |                  |               |      |               |           |  |
|                                                            |                                                                 |                  |                  |               |      |               |           |  |
|                                                            |                                                                 |                  |                  |               |      |               |           |  |
|                                                            |                                                                 |                  |                  |               |      |               |           |  |
|                                                            |                                                                 |                  |                  |               |      |               |           |  |
|                                                            |                                                                 |                  |                  |               |      |               |           |  |
|                                                            |                                                                 |                  |                  |               |      |               |           |  |
|                                                            |                                                                 |                  |                  |               |      |               |           |  |
|                                                            |                                                                 |                  |                  |               |      |               |           |  |
|                                                            |                                                                 |                  |                  |               |      |               |           |  |
|                                                            |                                                                 |                  |                  |               |      |               |           |  |
|                                                            |                                                                 |                  |                  |               |      |               |           |  |
|                                                            |                                                                 |                  |                  |               |      |               |           |  |
|                                                            |                                                                 |                  |                  |               |      |               |           |  |
|                                                            |                                                                 |                  |                  |               |      |               |           |  |
|                                                            |                                                                 |                  |                  |               |      |               |           |  |
|                                                            |                                                                 |                  |                  |               |      |               |           |  |
|                                                            |                                                                 |                  |                  |               |      |               |           |  |
|                                                            |                                                                 |                  |                  |               |      |               |           |  |
|                                                            |                                                                 |                  |                  |               |      |               |           |  |
|                                                            |                                                                 |                  |                  |               |      |               |           |  |
|                                                            |                                                                 |                  |                  |               |      |               |           |  |
|                                                            |                                                                 |                  |                  |               |      |               |           |  |
|                                                            |                                                                 |                  |                  |               |      |               |           |  |
|                                                            |                                                                 |                  |                  |               |      |               |           |  |
|                                                            |                                                                 |                  |                  |               |      |               |           |  |
|                                                            |                                                                 |                  |                  |               |      |               |           |  |
|                                                            |                                                                 |                  |                  |               |      |               |           |  |
|                                                            |                                                                 |                  |                  |               |      |               |           |  |
|                                                            |                                                                 |                  |                  |               |      |               |           |  |
|                                                            |                                                                 |                  |                  |               |      |               |           |  |
|                                                            |                                                                 |                  |                  |               |      |               |           |  |
|                                                            |                                                                 |                  |                  |               |      |               |           |  |
|                                                            |                                                                 |                  |                  |               |      |               |           |  |
|                                                            |                                                                 |                  |                  |               |      |               |           |  |
|                                                            |                                                                 |                  |                  |               |      |               |           |  |
|                                                            |                                                                 |                  |                  |               |      |               |           |  |
|                                                            |                                                                 |                  |                  |               |      |               |           |  |
|                                                            |                                                                 |                  |                  |               |      |               |           |  |
|                                                            |                                                                 |                  |                  |               |      |               |           |  |
|                                                            |                                                                 |                  |                  |               |      |               |           |  |
|                                                            |                                                                 |                  |                  |               |      |               |           |  |
|                                                            |                                                                 |                  |                  |               |      |               |           |  |
|                                                            |                                                                 |                  |                  |               |      |               |           |  |
|                                                            |                                                                 |                  |                  |               |      |               |           |  |
|                                                            |                                                                 |                  |                  |               |      |               |           |  |
|                                                            |                                                                 |                  |                  |               |      |               |           |  |
|                                                            |                                                                 |                  |                  |               |      |               |           |  |
|                                                            |                                                                 |                  |                  |               |      |               |           |  |
|                                                            |                                                                 |                  |                  |               |      |               |           |  |
|                                                            |                                                                 |                  |                  |               |      |               |           |  |
|                                                            |                                                                 |                  |                  |               |      |               |           |  |
|                                                            |                                                                 |                  |                  |               |      |               |           |  |
|                                                            |                                                                 |                  |                  |               |      |               |           |  |
|                                                            |                                                                 |                  |                  |               |      |               |           |  |
|                                                            |                                                                 |                  |                  |               |      |               |           |  |
|                                                            |                                                                 |                  |                  |               |      |               |           |  |
|                                                            |                                                                 |                  |                  |               |      |               |           |  |
|                                                            |                                                                 |                  |                  |               |      |               |           |  |
|                                                            |                                                                 |                  |                  |               |      |               |           |  |
|                                                            |                                                                 |                  |                  |               |      |               |           |  |
|                                                            |                                                                 |                  |                  |               |      |               |           |  |
|                                                            |                                                                 |                  |                  |               |      |               |           |  |
|                                                            |                                                                 |                  |                  |               |      |               |           |  |
|                                                            |                                                                 |                  |                  |               |      |               |           |  |
|                                                            |                                                                 |                  |                  |               |      |               |           |  |
|                                                            |                                                                 |                  |                  |               |      |               |           |  |
|                                                            |                                                                 |                  |                  |               |      |               |           |  |
|                                                            |                                                                 |                  |                  |               |      |               |           |  |
|                                                            |                                                                 |                  |                  |               |      |               |           |  |
|                                                            |                                                                 |                  |                  |               |      |               |           |  |



| OSU Argon Geochronology Lab |         |         |                |           |                |           |                 |           |                 |           |                 |           |                |           |                |           |                |           |                 |           |                 |           |                |           |                 |           |                |           |                |           |                |           |                |           |           |
|-----------------------------|---------|---------|----------------|-----------|----------------|-----------|-----------------|-----------|-----------------|-----------|-----------------|-----------|----------------|-----------|----------------|-----------|----------------|-----------|-----------------|-----------|-----------------|-----------|----------------|-----------|-----------------|-----------|----------------|-----------|----------------|-----------|----------------|-----------|----------------|-----------|-----------|
| Degassing<br>Patterns       |         |         | 36Ar(a)<br>[V] | %1σ       | 36Ar(c)<br>[V] | %1σ       | 36Ar(ca)<br>[V] | %1σ       | 36Ar(cl)<br>[V] | %1σ       | 37Ar(ca)<br>[V] | %1σ       | 38Ar(a)<br>[V] | %1σ       | 38Ar(c)<br>[V] | %1σ       | 38Ar(k)<br>[V] | %1σ       | 38Ar(ca)<br>[V] | %1σ       | 38Ar(cl)<br>[V] | %1σ       | 39Ar(k)<br>[V] | %1σ       | 39Ar(ca)<br>[V] | %1σ       | 40Ar(r)<br>[V] | %1σ       | 40Ar(a)<br>[V] | %1σ       | 40Ar(c)<br>[V] | %1σ       | 40Ar(k)<br>[V] | %1σ       |           |
|                             | 13C2060 | 500 °C  | ✓              | 0.0028076 | 0.79           | 0.0000000 | 0.00            | 0.0000016 | 4.47            | 0.0000001 | 10.36           | 0.0061403 | 4.47           | 0.0005247 | 0.79           | 0.0000000 | 0.00           | 0.0001522 | 0.33            | 0.0000009 | 4.47            | 0.0003588 | 11.68          | 0.0133748 | 0.33            | 0.0000041 | 4.47           | 0.0033556 | 201.39         | 0.829654  | 0.79           | 0.0000000 | 0.00           | 0.0000135 | 0.33      |
|                             | 13C2062 | 600 °C  | ✓              | 0.0063520 | 0.36           | 0.0000000 | 0.00            | 0.0000044 | 2.57            | 0.0000003 | 5.69            | 0.0166410 | 2.57           | 0.0011872 | 0.36           | 0.0000000 | 0.00           | 0.0005848 | 0.11            | 0.0000023 | 2.57            | 0.0014383 | 7.83           | 0.0513907 | 0.11            | 0.0000112 | 2.57           | 0.0160337 | 45.19          | 1.877003  | 0.36           | 0.0000000 | 0.00           | 0.0000519 | 0.11      |
|                             | 13C2063 | 700 °C  | ✓              | 0.0033535 | 0.90           | 0.0000000 | 0.00            | 0.0000050 | 2.33            | 0.0000003 | 5.95            | 0.0191032 | 2.33           | 0.0006268 | 0.90           | 0.0000000 | 0.00           | 0.0007532 | 0.17            | 0.0000027 | 2.33            | 0.0016253 | 8.02           | 0.0661849 | 0.17            | 0.0000129 | 2.33           | 0.0178797 | 50.29          | 0.990960  | 0.90           | 0.0000000 | 0.00           | 0.0000668 | 0.17      |
|                             | 13C2065 | 800 °C  | ✓              | 0.0048897 | 0.42           | 0.0000000 | 0.00            | 0.0000081 | 2.38            | 0.0000004 | 5.54            | 0.0306454 | 2.38           | 0.0009139 | 0.42           | 0.0000000 | 0.00           | 0.0010763 | 0.08            | 0.0000043 | 2.38            | 0.0021315 | 7.73           | 0.0945808 | 0.08            | 0.0000206 | 2.38           | 0.0406790 | 15.73          | 1.444903  | 0.42           | 0.0000000 | 0.00           | 0.0000955 | 0.08      |
|                             | 13C2066 | 900 °C  | ✓              | 0.0092645 | 0.20           | 0.0000000 | 0.00            | 0.0000110 | 2.20            | 0.0000004 | 5.58            | 0.0418128 | 2.20           | 0.0017315 | 0.20           | 0.0000000 | 0.00           | 0.0011144 | 0.13            | 0.0000058 | 2.20            | 0.0020257 | 7.75           | 0.0979247 | 0.13            | 0.0000281 | 2.20           | 0.0528153 | 12.00          | 2.737658  | 0.20           | 0.0000000 | 0.00           | 0.0000989 | 0.13      |
|                             | 13C2068 | 1050 °C | ✓              | 0.0205106 | 0.23           | 0.0000000 | 0.00            | 0.0000396 | 2.16            | 0.0000008 | 5.43            | 0.1498284 | 2.16           | 0.0038334 | 0.23           | 0.0000000 | 0.00           | 0.0019142 | 0.07            | 0.0000208 | 2.16            | 0.0037100 | 7.64           | 0.1682040 | 0.07            | 0.0001008 | 2.16           | 0.0913321 | 15.52          | 6.060895  | 0.23           | 0.0000000 | 0.00           | 0.0001699 | 0.07      |
|                             | 13C2069 | 1250 °C | ✓              | 0.0208344 | 0.12           | 0.0000000 | 0.00            | 0.0001061 | 2.17            | 0.0000008 | 5.44            | 0.4017691 | 2.17           | 0.0038940 | 0.12           | 0.0000000 | 0.00           | 0.0020991 | 0.12            | 0.0000558 | 2.17            | 0.0040072 | 7.65           | 0.1844549 | 0.12            | 0.0002704 | 2.17           | 0.1072763 | 7.91           | 6.156575  | 0.12           | 0.0000000 | 0.00           | 0.0001863 | 0.12      |
|                             | 13C2071 | 1400 °C | ✓              | 0.0034317 | 0.58           | 0.0000000 | 0.00            | 0.0000295 | 2.16            | 0.0000002 | 6.94            | 0.1117377 | 2.16           | 0.0006414 | 0.58           | 0.0000000 | 0.00           | 0.0003971 | 0.20            | 0.0000155 | 2.16            | 0.0007176 | 8.78           | 0.0348912 | 0.20            | 0.0000752 | 2.16           | 0.0146788 | 41.37          | 1.014054  | 0.58           | 0.0000000 | 0.00           | 0.0000352 | 0.20      |
|                             |         | Σ       |                | 0.0714440 | 0.11           | 0.0000000 | 0.00            | 0.0002053 | 1.25            | 0.0000034 | 2.29            | 0.7776780 | 1.25           | 0.0133529 | 0.11           | 0.0000000 | 0.00           | 0.0080912 | 0.05            | 0.0001081 | 1.25            | 0.0160144 | 3.19           | 0.7110060 | 0.05            | 0.0005234 | 1.25           | 0.3440505 | 6.94           | 21.111703 | 0.11           | 0.0000000 | 0.00           | 0.0007181 | 0.05      |
|                             |         | Σ       |                |           |                |           |                 |           |                 |           | 0.0716527       | 0.11      | 0.7776780      | 1.25      |                |           |                |           |                 |           |                 | 0.0375666 | 1.36           |           |                 |           | 0.7115294      | 0.05      |                |           |                |           |                |           | 21.456471 |



| Additional Parameters |         |   | 40Ar/39Ar | 1σ       | 37Ar/39Ar | 1σ       | 36Ar/39Ar | 1σ       | Time (days) | 37Ar (decay) | 39Ar (decay) | 40Ar (moles) |
|-----------------------|---------|---|-----------|----------|-----------|----------|-----------|----------|-------------|--------------|--------------|--------------|
| 13C2060               | 500 °C  | ✓ | 62.263932 | 0.234176 | 0.458954  | 0.020559 | 0.209982  | 0.001808 | 108.649     | 8.572068     | 1.00076781   | 1.666E-13    |
| 13C2062               | 600 °C  | ✓ | 36.829171 | 0.066720 | 0.323744  | 0.008337 | 0.123666  | 0.000460 | 108.685     | 8.578067     | 1.00076806   | 3.786E-13    |
| 13C2063               | 700 °C  | ✓ | 15.240812 | 0.033028 | 0.288578  | 0.006730 | 0.050740  | 0.000462 | 108.703     | 8.581127     | 1.00076818   | 2.018E-13    |
| 13C2065               | 800 °C  | ✓ | 15.704591 | 0.026365 | 0.323942  | 0.007717 | 0.051777  | 0.000220 | 108.738     | 8.587014     | 1.00076843   | 2.971E-13    |
| 13C2066               | 900 °C  | ✓ | 28.488943 | 0.047321 | 0.426867  | 0.009420 | 0.094698  | 0.000228 | 108.755     | 8.589959     | 1.00076855   | 5.581E-13    |
| 13C2068               | 1050 °C | ✓ | 36.555075 | 0.031342 | 0.890220  | 0.019255 | 0.122106  | 0.000291 | 108.790     | 8.595853     | 1.00076880   | 1.230E-12    |
| 13C2069               | 1250 °C | ✓ | 33.910019 | 0.047386 | 2.174955  | 0.047218 | 0.113365  | 0.000187 | 108.808     | 8.599037     | 1.00076893   | 1.253E-12    |
| 13C2071               | 1400 °C | ✓ | 29.421578 | 0.073201 | 3.195569  | 0.069430 | 0.098989  | 0.000602 | 108.845     | 8.605290     | 1.00076919   | 2.058E-13    |



| Procedure<br>Blanks |         | 36Ar<br>[V] | 1σ        | 37Ar<br>[V] | 1σ        | 38Ar<br>[V] | 1σ        | 39Ar<br>[V] | 1σ        | 40Ar<br>[V] | 1σ        |
|---------------------|---------|-------------|-----------|-------------|-----------|-------------|-----------|-------------|-----------|-------------|-----------|
| 13C2060             | 500 °C  | 0.0002860   | 0.0000133 | 0.0000157   | 0.0000162 | 0.0000118   | 0.0000184 | 0.0000338   | 0.0000277 | 0.0019285   | 0.0012708 |
| 13C2062             | 600 °C  | 0.0003118   | 0.0000133 | 0.0000246   | 0.0000162 | 0.0000217   | 0.0000184 | 0.0000423   | 0.0000277 | 0.0038832   | 0.0012708 |
| 13C2063             | 700 °C  | 0.0003221   | 0.0000133 | 0.0000280   | 0.0000162 | 0.0000256   | 0.0000184 | 0.0000583   | 0.0000277 | 0.0046352   | 0.0012708 |
| 13C2065             | 800 °C  | 0.0003366   | 0.0000133 | 0.0000320   | 0.0000162 | 0.0000310   | 0.0000184 | 0.0000987   | 0.0000277 | 0.0056173   | 0.0012708 |
| 13C2066             | 900 °C  | 0.0003412   | 0.0000133 | 0.0000329   | 0.0000162 | 0.0000327   | 0.0000184 | 0.0001192   | 0.0000277 | 0.0058793   | 0.0012708 |
| 13C2068             | 1050 °C | 0.0003450   | 0.0000133 | 0.0000322   | 0.0000162 | 0.0000339   | 0.0000184 | 0.0001515   | 0.0000277 | 0.0059453   | 0.0012708 |
| 13C2069             | 1250 °C | 0.0003442   | 0.0000133 | 0.0000306   | 0.0000162 | 0.0000334   | 0.0000184 | 0.0001605   | 0.0000277 | 0.0057271   | 0.0012708 |
| 13C2071             | 1400 °C | 0.0003365   | 0.0000133 | 0.0000248   | 0.0000162 | 0.0000301   | 0.0000184 | 0.0001533   | 0.0000277 | 0.0047808   | 0.0012708 |



| OSU Argon Geochronology Lab |         |             |           |           |        |             |           |           |        |             |           |           |        |             |           |           |        |               |           |           |        |
|-----------------------------|---------|-------------|-----------|-----------|--------|-------------|-----------|-----------|--------|-------------|-----------|-----------|--------|-------------|-----------|-----------|--------|---------------|-----------|-----------|--------|
| Intercept<br>Values         |         | 36Ar<br>[V] | 1σ        | r2        |        | 37Ar<br>[V] | 1σ        | r2        |        | 38Ar<br>[V] | 1σ        | r2        |        | 39Ar<br>[V] | 1σ        | r2        |        | 40Ar<br>[V]   | 1σ        | r2        |        |
|                             | 13C2060 | 500 °C      | 0.0032034 | 0.0000190 | 0.9508 | LIN #       | 0.0007529 | 0.0000239 | 0.1385 | EXP #       | 0.0010691 | 0.0000263 | 0.2983 | LIN #       | 0.0135455 | 0.0000352 | 0.9887 | EXP #         | 0.8362061 | 0.0007503 | 0.9983 |
|                             | 13C2062 | 600 °C      | 0.0069138 | 0.0000194 | 0.9926 | LIN # 1 8   | 0.0020215 | 0.0000231 | 0.2278 | LIN # 4 8   | 0.0032990 | 0.0000191 | 0.9283 | LIN #       | 0.0519647 | 0.0000482 | 0.9233 | LIN # 4 6     | 1.9002027 | 0.0024601 | 0.9983 |
|                             | 13C2063 | 700 °C      | 0.0038105 | 0.0000282 | 0.9530 | LIN # 2 5 8 | 0.0023192 | 0.0000123 | 0.8658 | EXP # 3 9   | 0.0030938 | 0.0000372 | 0.8402 | LIN #       | 0.0669197 | 0.0001068 | 0.9943 | EXP # 6       | 1.0151664 | 0.0006259 | 0.9992 |
|                             | 13C2065 | 800 °C      | 0.0054230 | 0.0000165 | 0.9880 | LIN # 5     | 0.0037047 | 0.0000339 | 0.8136 | LIN # 6 7   | 0.0042392 | 0.0000210 | 0.9646 | LIN #       | 0.0956390 | 0.0000762 | 0.9988 | EXP # 6 8     | 1.4935346 | 0.0017387 | 0.9979 |
|                             | 13C2066 | 900 °C      | 0.0099750 | 0.0000145 | 0.9969 | LIN #       | 0.0050432 | 0.0000176 | 0.3291 | EXP #       | 0.0050083 | 0.0000236 | 0.9417 | LIN #       | 0.0990640 | 0.0001227 | 0.9658 | LIN # 1       | 2.8012138 | 0.0027012 | 0.9990 |
|                             | 13C2068 | 1050 °C     | 0.0216882 | 0.0000468 | 0.9919 | LIN #       | 0.0179735 | 0.0000346 | 0.9857 | EXP # 7     | 0.0097032 | 0.0000143 | 0.9891 | LIN #       | 0.1701606 | 0.0001149 | 0.9537 | EXP # 1 4 11  | 6.1688291 | 0.0028169 | 0.9993 |
|                             | 13C2069 | 1250 °C     | 0.0220927 | 0.0000210 | 0.9986 | EXP #       | 0.0481226 | 0.0001258 | 0.9933 | EXP # 4     | 0.0102920 | 0.0000243 | 0.9753 | LIN #       | 0.1867563 | 0.0002194 | 0.0276 | LIN # 2 3 4 6 | 6.2804417 | 0.0044664 | 0.9982 |
|                             | 13C2071 | 1400 °C     | 0.0039313 | 0.0000158 | 0.9688 | LIN #       | 0.0133888 | 0.0000244 | 0.9967 | EXP #       | 0.0018372 | 0.0000259 | 0.5381 | LIN #       | 0.0354704 | 0.0000648 | 0.0022 | EXP #         | 1.0352050 | 0.0008476 | 0.9986 |
|                             |         |             |           |           |        |             |           |           |        |             |           |           |        |             |           |           |        |               |           |           |        |



| OSU Argon Geochronology Lab |  |         |          |          |            |                   |               |                  |       |                    |                    |                     |   |     |               |       |     |     |              |                        |        |       |      |      |      |        |             |       |         |         |         |            |           |         |    |
|-----------------------------|--|---------|----------|----------|------------|-------------------|---------------|------------------|-------|--------------------|--------------------|---------------------|---|-----|---------------|-------|-----|-----|--------------|------------------------|--------|-------|------|------|------|--------|-------------|-------|---------|---------|---------|------------|-----------|---------|----|
| Sample Parameters           |  | Sample  | Material | Location | Analyst    | Temp              | Standard Name | Standard (in Ma) | %1σ   | Standard Reference | Standard 40Ar/39Ar | %1σ                 | J | %1σ | Air 40Ar/36Ar | %1σ   | MDF | %1σ | Volume Ratio | Sensitivity (mol/volt) | Day    | Month | Year | Hour | Min  | Resist | Irradiation | X-pos | Y-pos   | Z/H-pos | Project | Experiment | Nmb       |         |    |
|                             |  | 13C2060 | 500 °C   | 253-12   | Groundmass | Kerguelen Plateau | Kyle Krawl    | 500              | FCT-3 | 28.201             | 0.083              | Kuiper et al., 2008 |   |     | 0.00158793    | 0.255 |     |     | 1.0092       | 0.001                  | 0.9985 | 2E-13 | 23   | JUL  | 2013 | 7      | 36          | 1     | OSU2C13 | 0.00    | 0.00    | 37.70      | Kerguelen | 13C2060 | 01 |
|                             |  | 13C2062 | 600 °C   | 253-12   | Groundmass | Kerguelen Plateau | Trevor Smith  | 600              | FCT-3 | 28.201             | 0.083              | Kuiper et al., 2008 |   |     | 0.00158793    | 0.255 |     |     | 1.0092       | 0.001                  | 0.9983 | 2E-13 | 23   | JUL  | 2013 | 8      | 27          | 1     | OSU2C13 | 0.00    | 0.00    | 37.70      | Kerguelen | 13C2060 | 01 |
|                             |  | 13C2063 | 700 °C   | 253-12   | Groundmass | Kerguelen Plateau | Trevor Smith  | 700              | FCT-3 | 28.201             | 0.083              | Kuiper et al., 2008 |   |     | 0.00158793    | 0.255 |     |     | 1.0092       | 0.001                  | 0.9984 | 2E-13 | 23   | JUL  | 2013 | 8      | 53          | 1     | OSU2C13 | 0.00    | 0.00    | 37.70      | Kerguelen | 13C2060 | 01 |
|                             |  | 13C2065 | 800 °C   | 253-12   | Groundmass | Kerguelen Plateau | Trevor Smith  | 800              | FCT-3 | 28.201             | 0.083              | Kuiper et al., 2008 |   |     | 0.00158793    | 0.255 |     |     | 1.0092       | 0.001                  | 0.9985 | 2E-13 | 23   | JUL  | 2013 | 9      | 43          | 1     | OSU2C13 | 0.00    | 0.00    | 37.70      | Kerguelen | 13C2060 | 01 |
|                             |  | 13C2066 | 900 °C   | 253-12   | Groundmass | Kerguelen Plateau | Trevor Smith  | 900              | FCT-3 | 28.201             | 0.083              | Kuiper et al., 2008 |   |     | 0.00158793    | 0.255 |     |     | 1.0092       | 0.001                  | 0.9983 | 2E-13 | 23   | JUL  | 2013 | 10     | 8           | 1     | OSU2C13 | 0.00    | 0.00    | 37.70      | Kerguelen | 13C2060 | 01 |
|                             |  | 13C2068 | 1050 °C  | 253-12   | Groundmass | Kerguelen Plateau | Kyle Krawl    | 1050             | FCT-3 | 28.201             | 0.083              | Kuiper et al., 2008 |   |     | 0.00158793    | 0.255 |     |     | 1.0092       | 0.001                  | 0.9983 | 2E-13 | 23   | JUL  | 2013 | 10     | 58          | 1     | OSU2C13 | 0.00    | 0.00    | 37.70      | Kerguelen | 13C2060 | 01 |
|                             |  | 13C2069 | 1250 °C  | 253-12   | Groundmass | Kerguelen Plateau | Trevor Smith  | 1250             | FCT-3 | 28.201             | 0.083              | Kuiper et al., 2008 |   |     | 0.00158793    | 0.255 |     |     | 1.0092       | 0.001                  | 0.9983 | 2E-13 | 23   | JUL  | 2013 | 11     | 25          | 1     | OSU2C13 | 0.00    | 0.00    | 37.70      | Kerguelen | 13C2060 | 01 |
|                             |  | 13C2071 | 1400 °C  | 253-12   | Groundmass | Kerguelen Plateau | Trevor Smith  | 1400             | FCT-3 | 28.201             | 0.083              | Kuiper et al., 2008 |   |     | 0.00158793    | 0.255 |     |     | 1.0092       | 0.001                  | 0.9984 | 2E-13 | 23   | JUL  | 2013 | 12     | 18          | 1     | OSU2C13 | 0.00    | 0.00    | 37.70      | Kerguelen | 13C2060 | 01 |
|                             |  |         |          |          |            |                   |               |                  |       |                    |                    |                     |   |     |               |       |     |     |              |                        |        |       |      |      |      |        |             |       |         |         |         |            |           |         |    |



| Irradiation Constants |         | OSU Argon Geochronology Lab |     |          |     |          |     |          |     |           |     |           |     |           |     |          |     |          |     |           |     |      |     |      |     |       |     |  |
|-----------------------|---------|-----------------------------|-----|----------|-----|----------|-----|----------|-----|-----------|-----|-----------|-----|-----------|-----|----------|-----|----------|-----|-----------|-----|------|-----|------|-----|-------|-----|--|
|                       |         | 40/36(a)                    | %1σ | 40/36(c) | %1σ | 38/36(a) | %1σ | 38/36(c) | %1σ | 39/37(ca) | %1σ | 38/37(ca) | %1σ | 36/37(ca) | %1σ | 40/39(k) | %1σ | 38/39(k) | %1σ | 36/38(cl) | %1σ | K/Ca | %1σ | K/Cl | %1σ | Ca/Cl | %1σ |  |
| 13C2060               | 500 °C  | 295.5                       | 0   | 0.018    | 35  | 0.1869   | 0   | 1.493    | 3   | 0.000673  | 0   | 0.000139  | 0   | 0.000264  | 0   | 0.00101  | 0   | 0.01138  | 0   | 0         | 0   | 0.43 | 0   | 0    | 0   | 0     | 0   |  |
| 13C2062               | 600 °C  | 295.5                       | 0   | 0.018    | 35  | 0.1869   | 0   | 1.493    | 3   | 0.000673  | 0   | 0.000139  | 0   | 0.000264  | 0   | 0.00101  | 0   | 0.01138  | 0   | 0         | 0   | 0.43 | 0   | 0    | 0   | 0     | 0   |  |
| 13C2063               | 700 °C  | 295.5                       | 0   | 0.018    | 35  | 0.1869   | 0   | 1.493    | 3   | 0.000673  | 0   | 0.000139  | 0   | 0.000264  | 0   | 0.00101  | 0   | 0.01138  | 0   | 0         | 0   | 0.43 | 0   | 0    | 0   | 0     | 0   |  |
| 13C2065               | 800 °C  | 295.5                       | 0   | 0.018    | 35  | 0.1869   | 0   | 1.493    | 3   | 0.000673  | 0   | 0.000139  | 0   | 0.000264  | 0   | 0.00101  | 0   | 0.01138  | 0   | 0         | 0   | 0.43 | 0   | 0    | 0   | 0     | 0   |  |
| 13C2066               | 900 °C  | 295.5                       | 0   | 0.018    | 35  | 0.1869   | 0   | 1.493    | 3   | 0.000673  | 0   | 0.000139  | 0   | 0.000264  | 0   | 0.00101  | 0   | 0.01138  | 0   | 0         | 0   | 0.43 | 0   | 0    | 0   | 0     | 0   |  |
| 13C2068               | 1050 °C | 295.5                       | 0   | 0.018    | 35  | 0.1869   | 0   | 1.493    | 3   | 0.000673  | 0   | 0.000139  | 0   | 0.000264  | 0   | 0.00101  | 0   | 0.01138  | 0   | 0         | 0   | 0.43 | 0   | 0    | 0   | 0     | 0   |  |
| 13C2069               | 1250 °C | 295.5                       | 0   | 0.018    | 35  | 0.1869   | 0   | 1.493    | 3   | 0.000673  | 0   | 0.000139  | 0   | 0.000264  | 0   | 0.00101  | 0   | 0.01138  | 0   | 0         | 0   | 0.43 | 0   | 0    | 0   | 0     | 0   |  |
| 13C2071               | 1400 °C | 295.5                       | 0   | 0.018    | 35  | 0.1869   | 0   | 1.493    | 3   | 0.000673  | 0   | 0.000139  | 0   | 0.000264  | 0   | 0.00101  | 0   | 0.01138  | 0   | 0         | 0   | 0.43 | 0   | 0    | 0   | 0     | 0   |  |



13C2060.AGE >>> 253-12 >>> KERGUELEN PROJECT

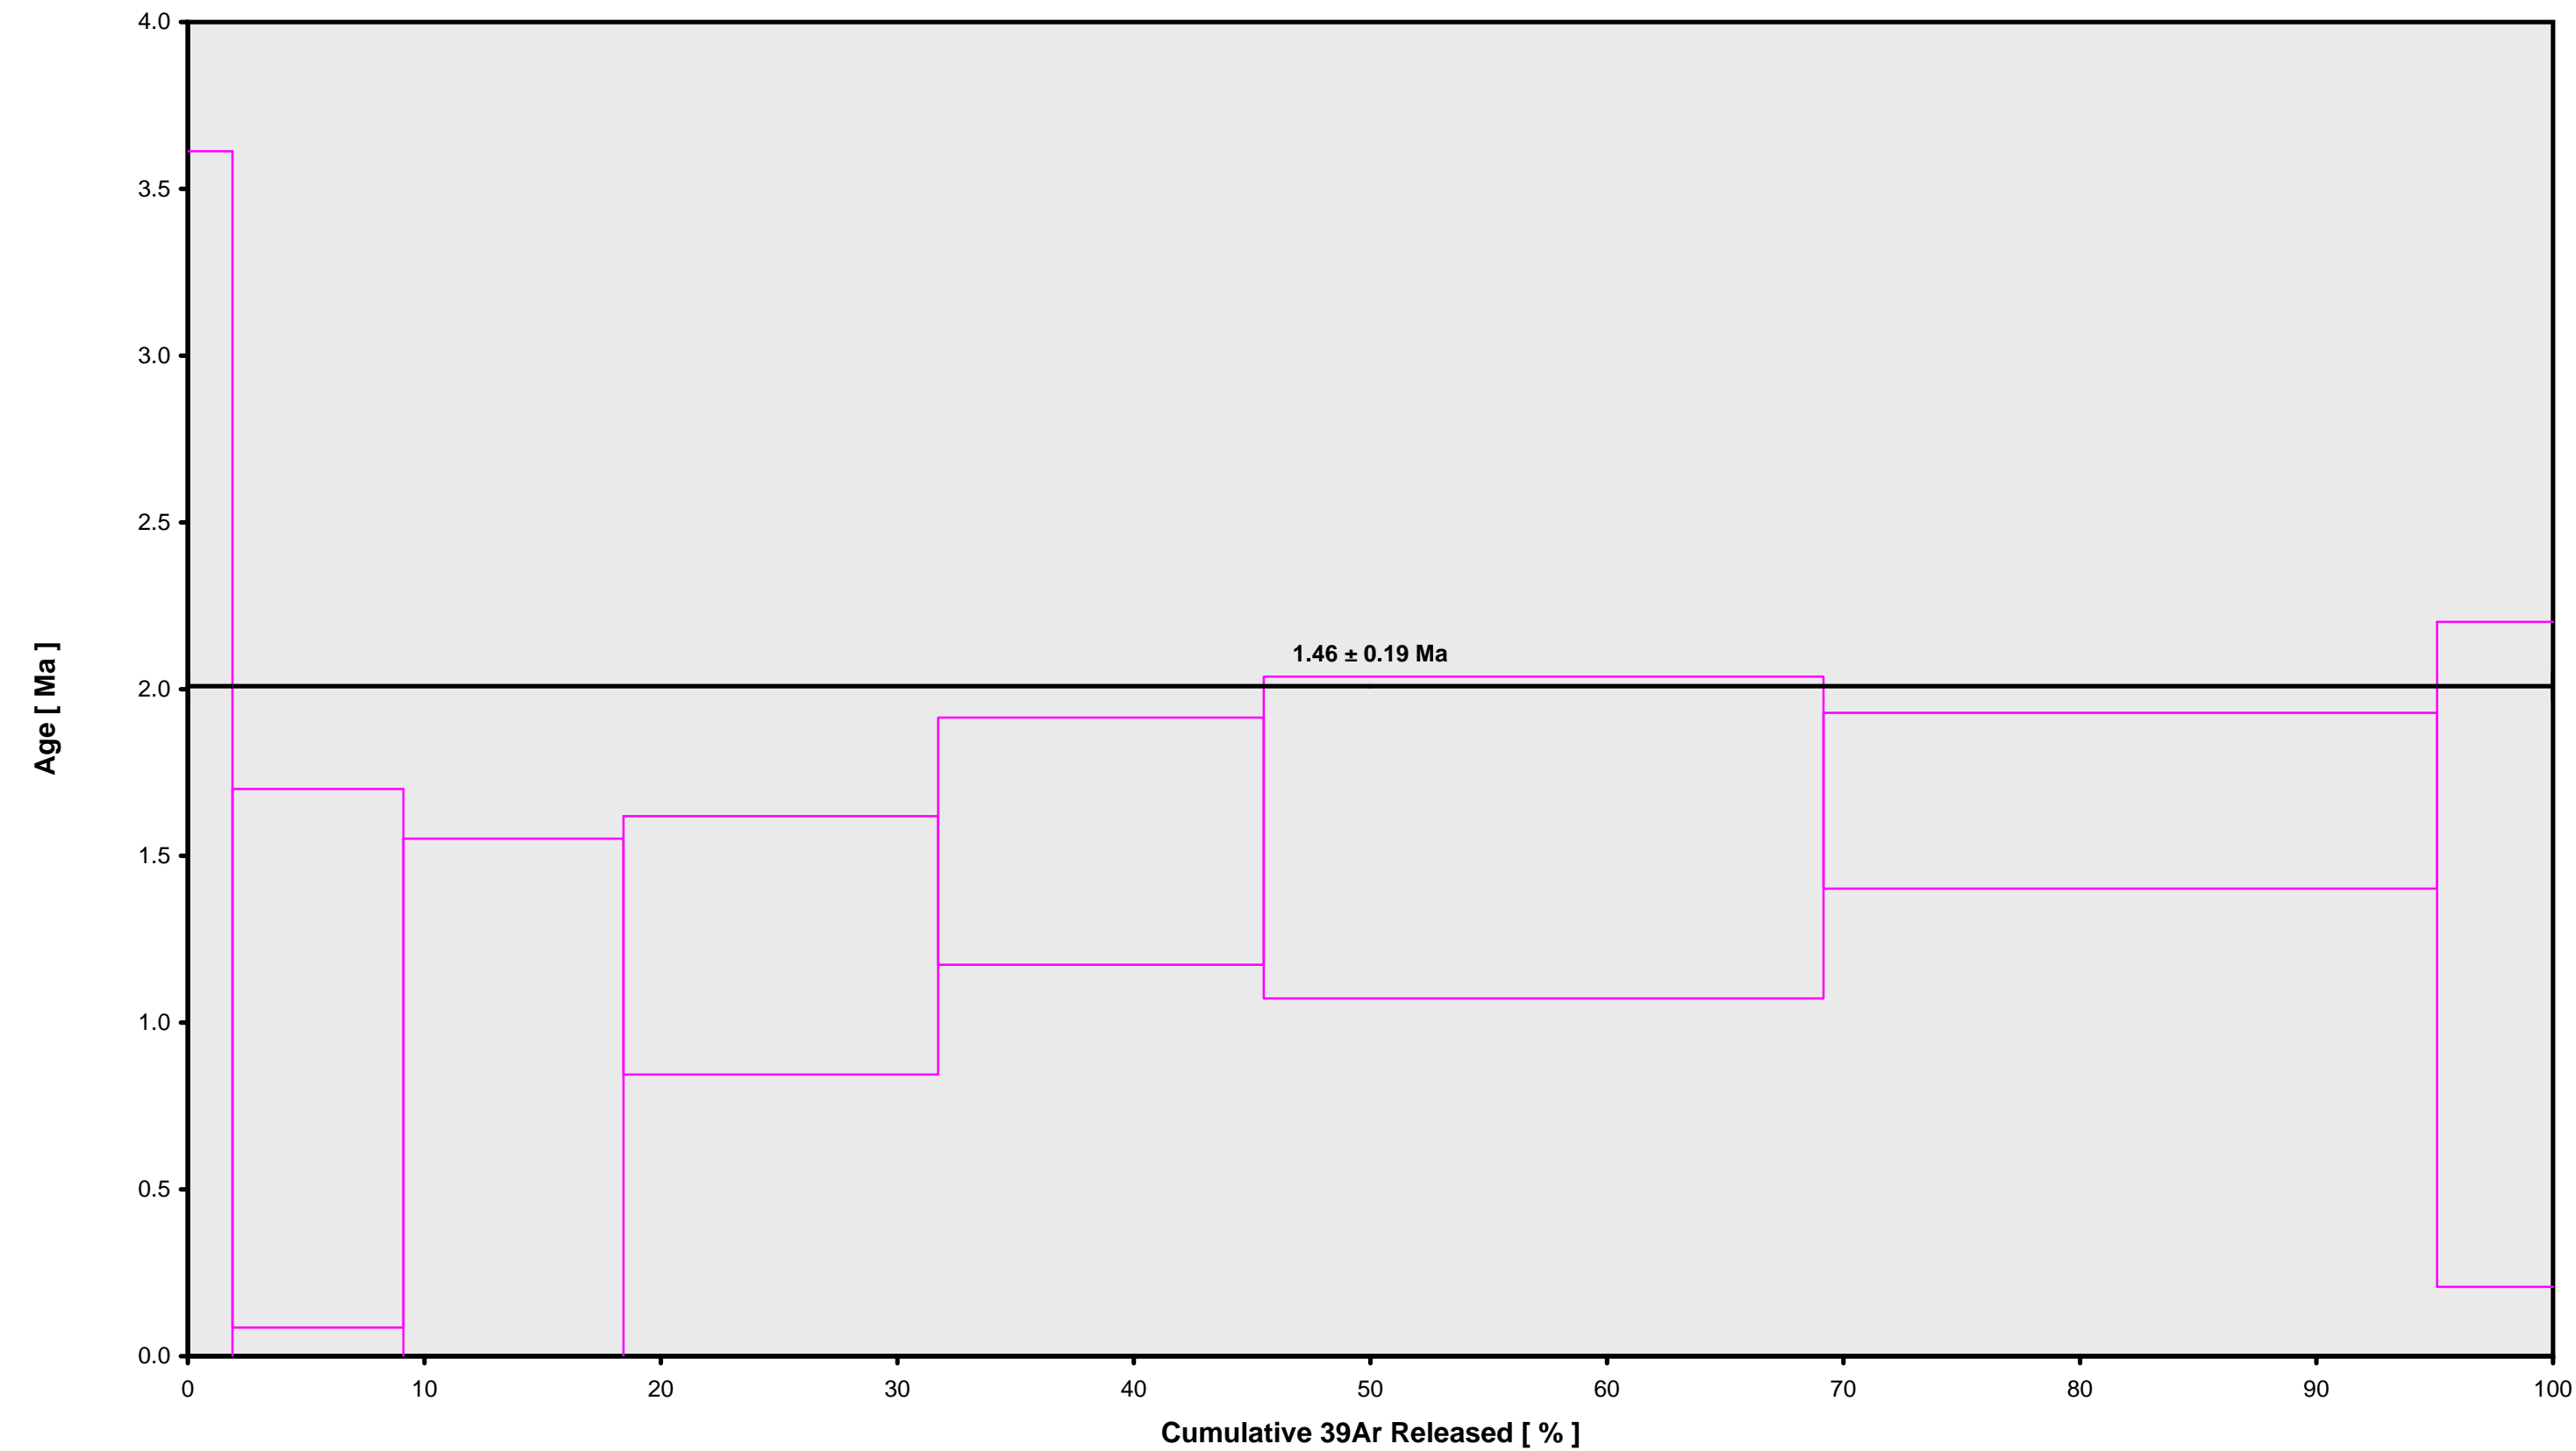

Ar-Ages in Ma

WEIGHTED PLATEAU

1.46 ± 0.19

TOTAL FUSION

1.39 ± 0.19

NORMAL ISOCHRON

0.92 ± 0.66

INVERSE ISOCHRON

0.92 ± 0.49

MSWD (PROBABILITY)

1.40 (20%)

Sample Info

Groundmass

Kerguelen Plateau

Kyle Krawl

IRR = OSU2C13

J = 0.00158793 ± 0.00000405

RECALIBRATED AGE



13C2060.AGE >>> 253-12 >>> KERGUELEN PROJECT

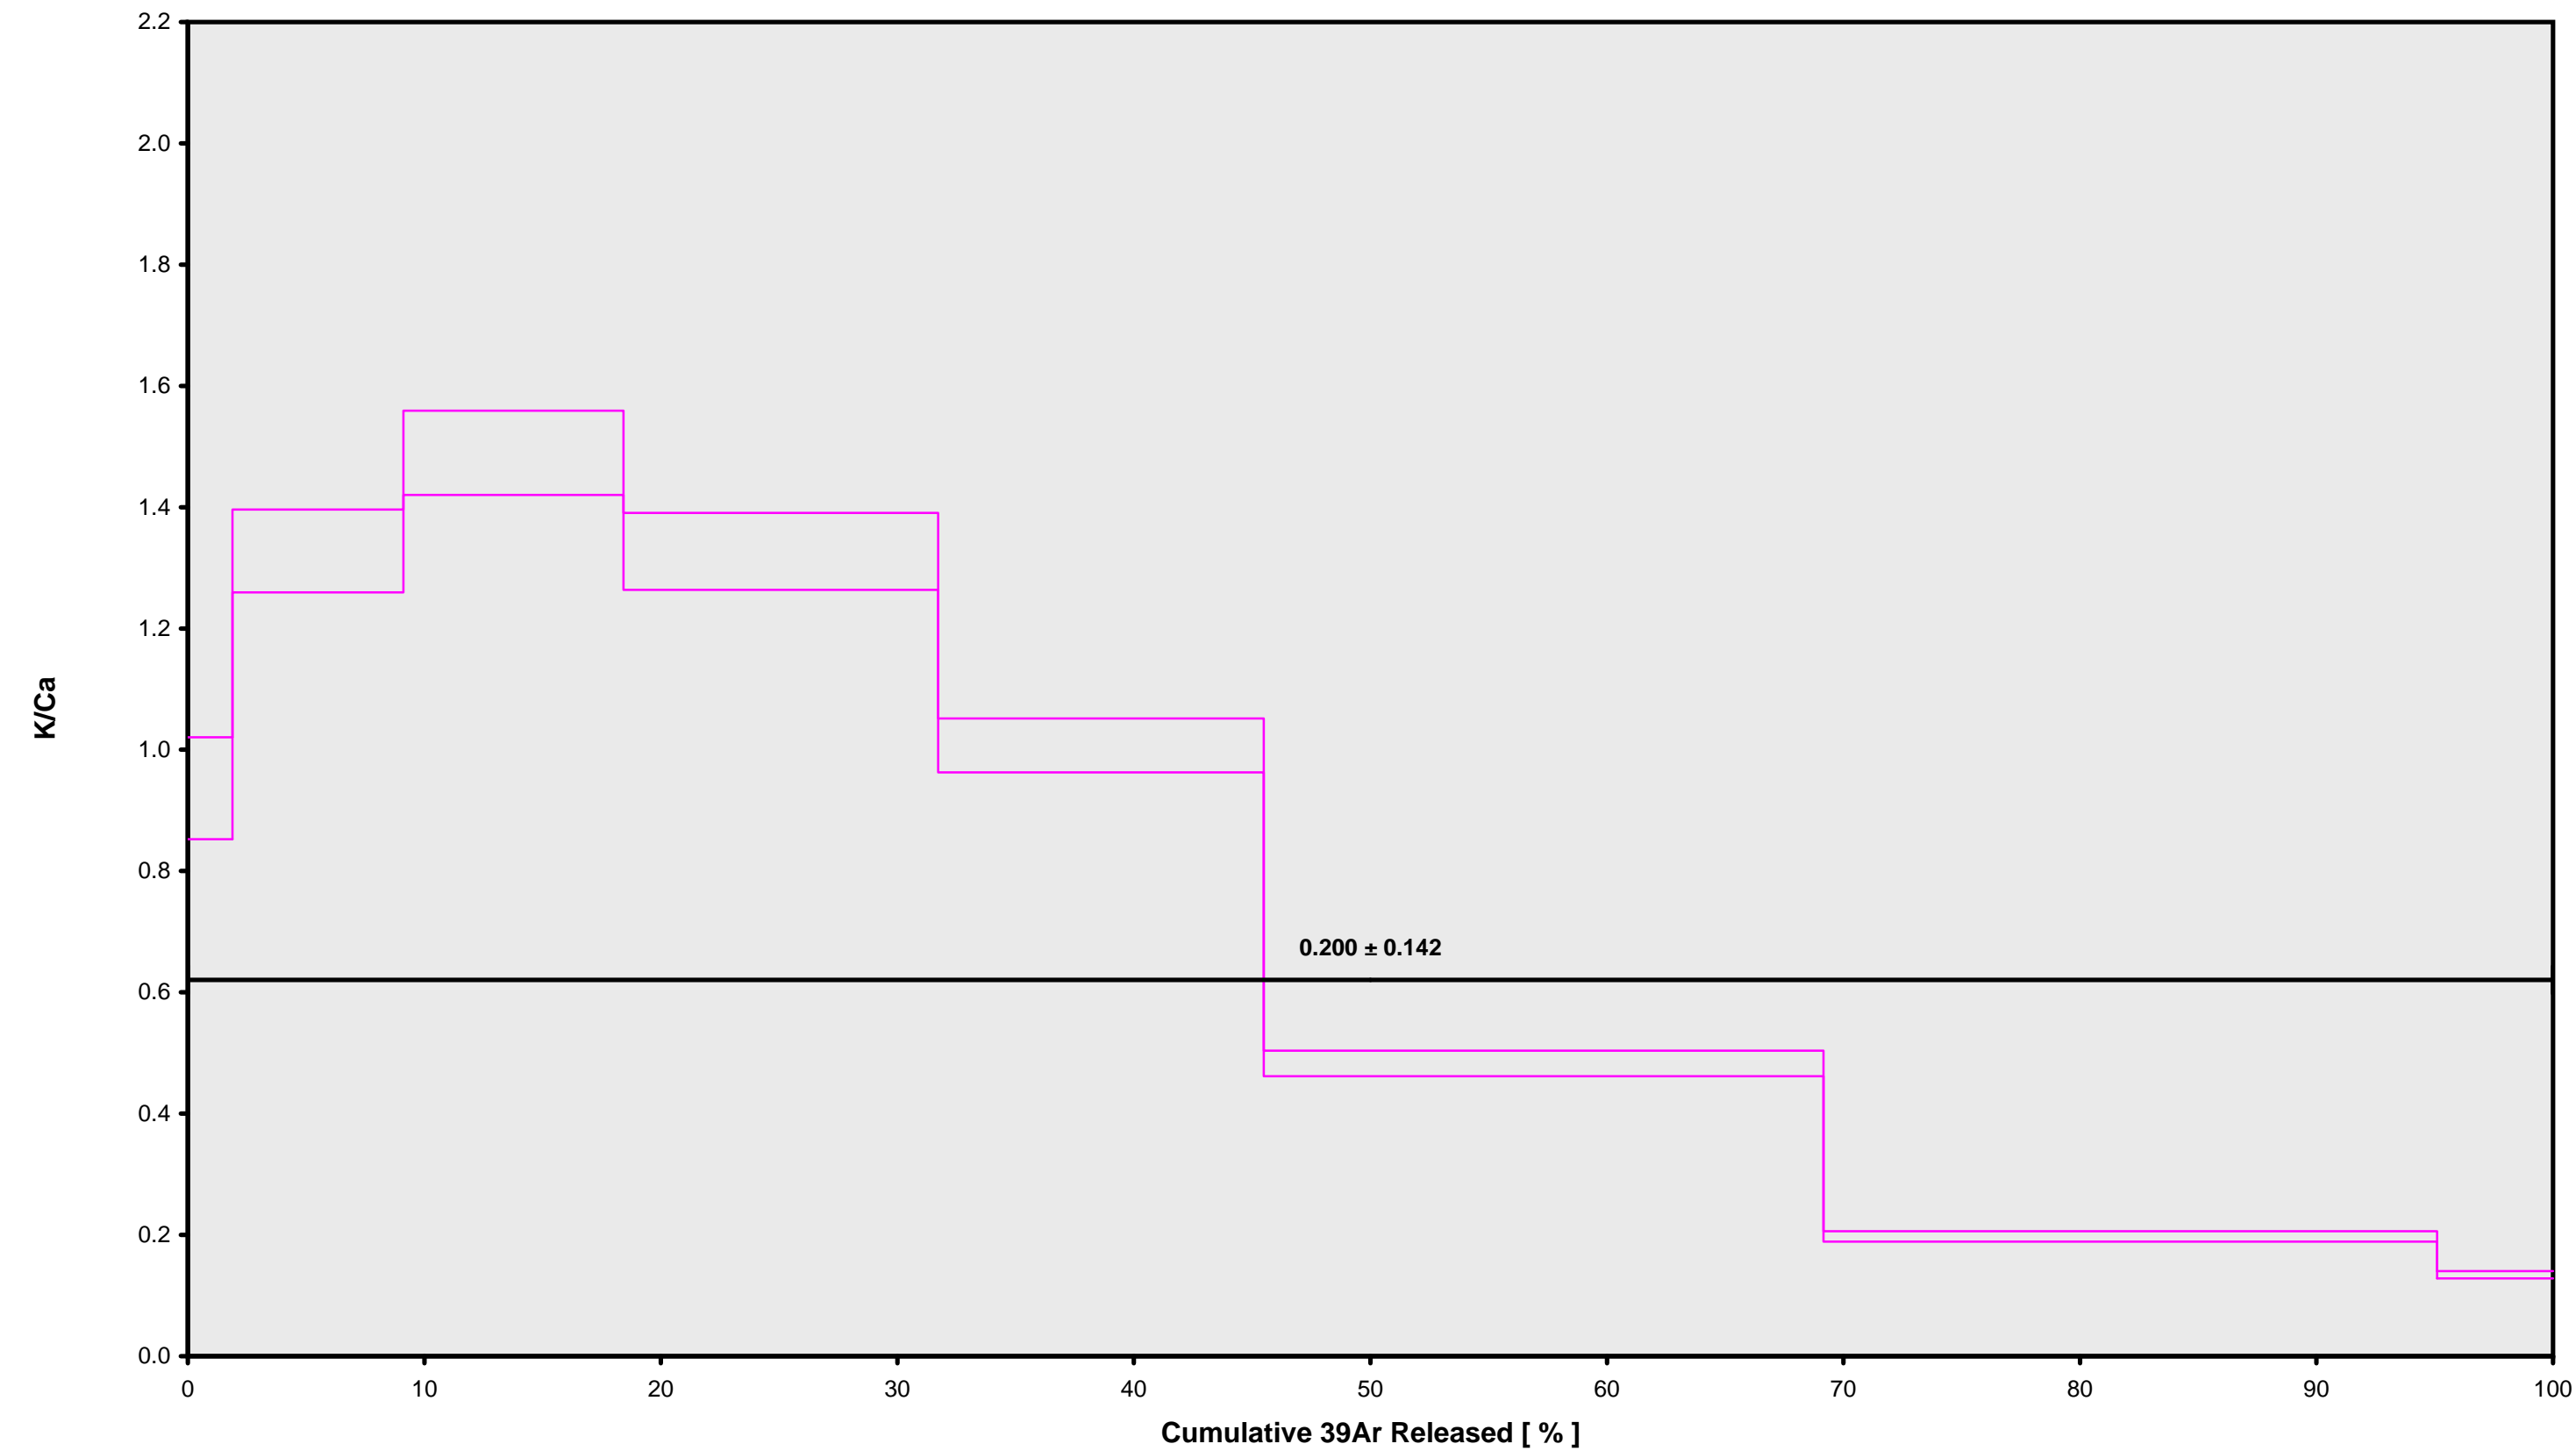

Ar-Ages in Ma

WEIGHTED PLATEAU

1.46 ± 0.19

TOTAL FUSION

1.39 ± 0.19

NORMAL ISOCHRON

0.92 ± 0.66

INVERSE ISOCHRON

0.92 ± 0.49

Sample Info

Groundmass

Kerguelen Plateau

Kyle Krawl

IRR = OSU2C13

J = 0.00158793 ± 0.00000405

RECALIBRATED AGE



13C2060.AGE >>> 253-12 >>> KERGUELEN PROJECT

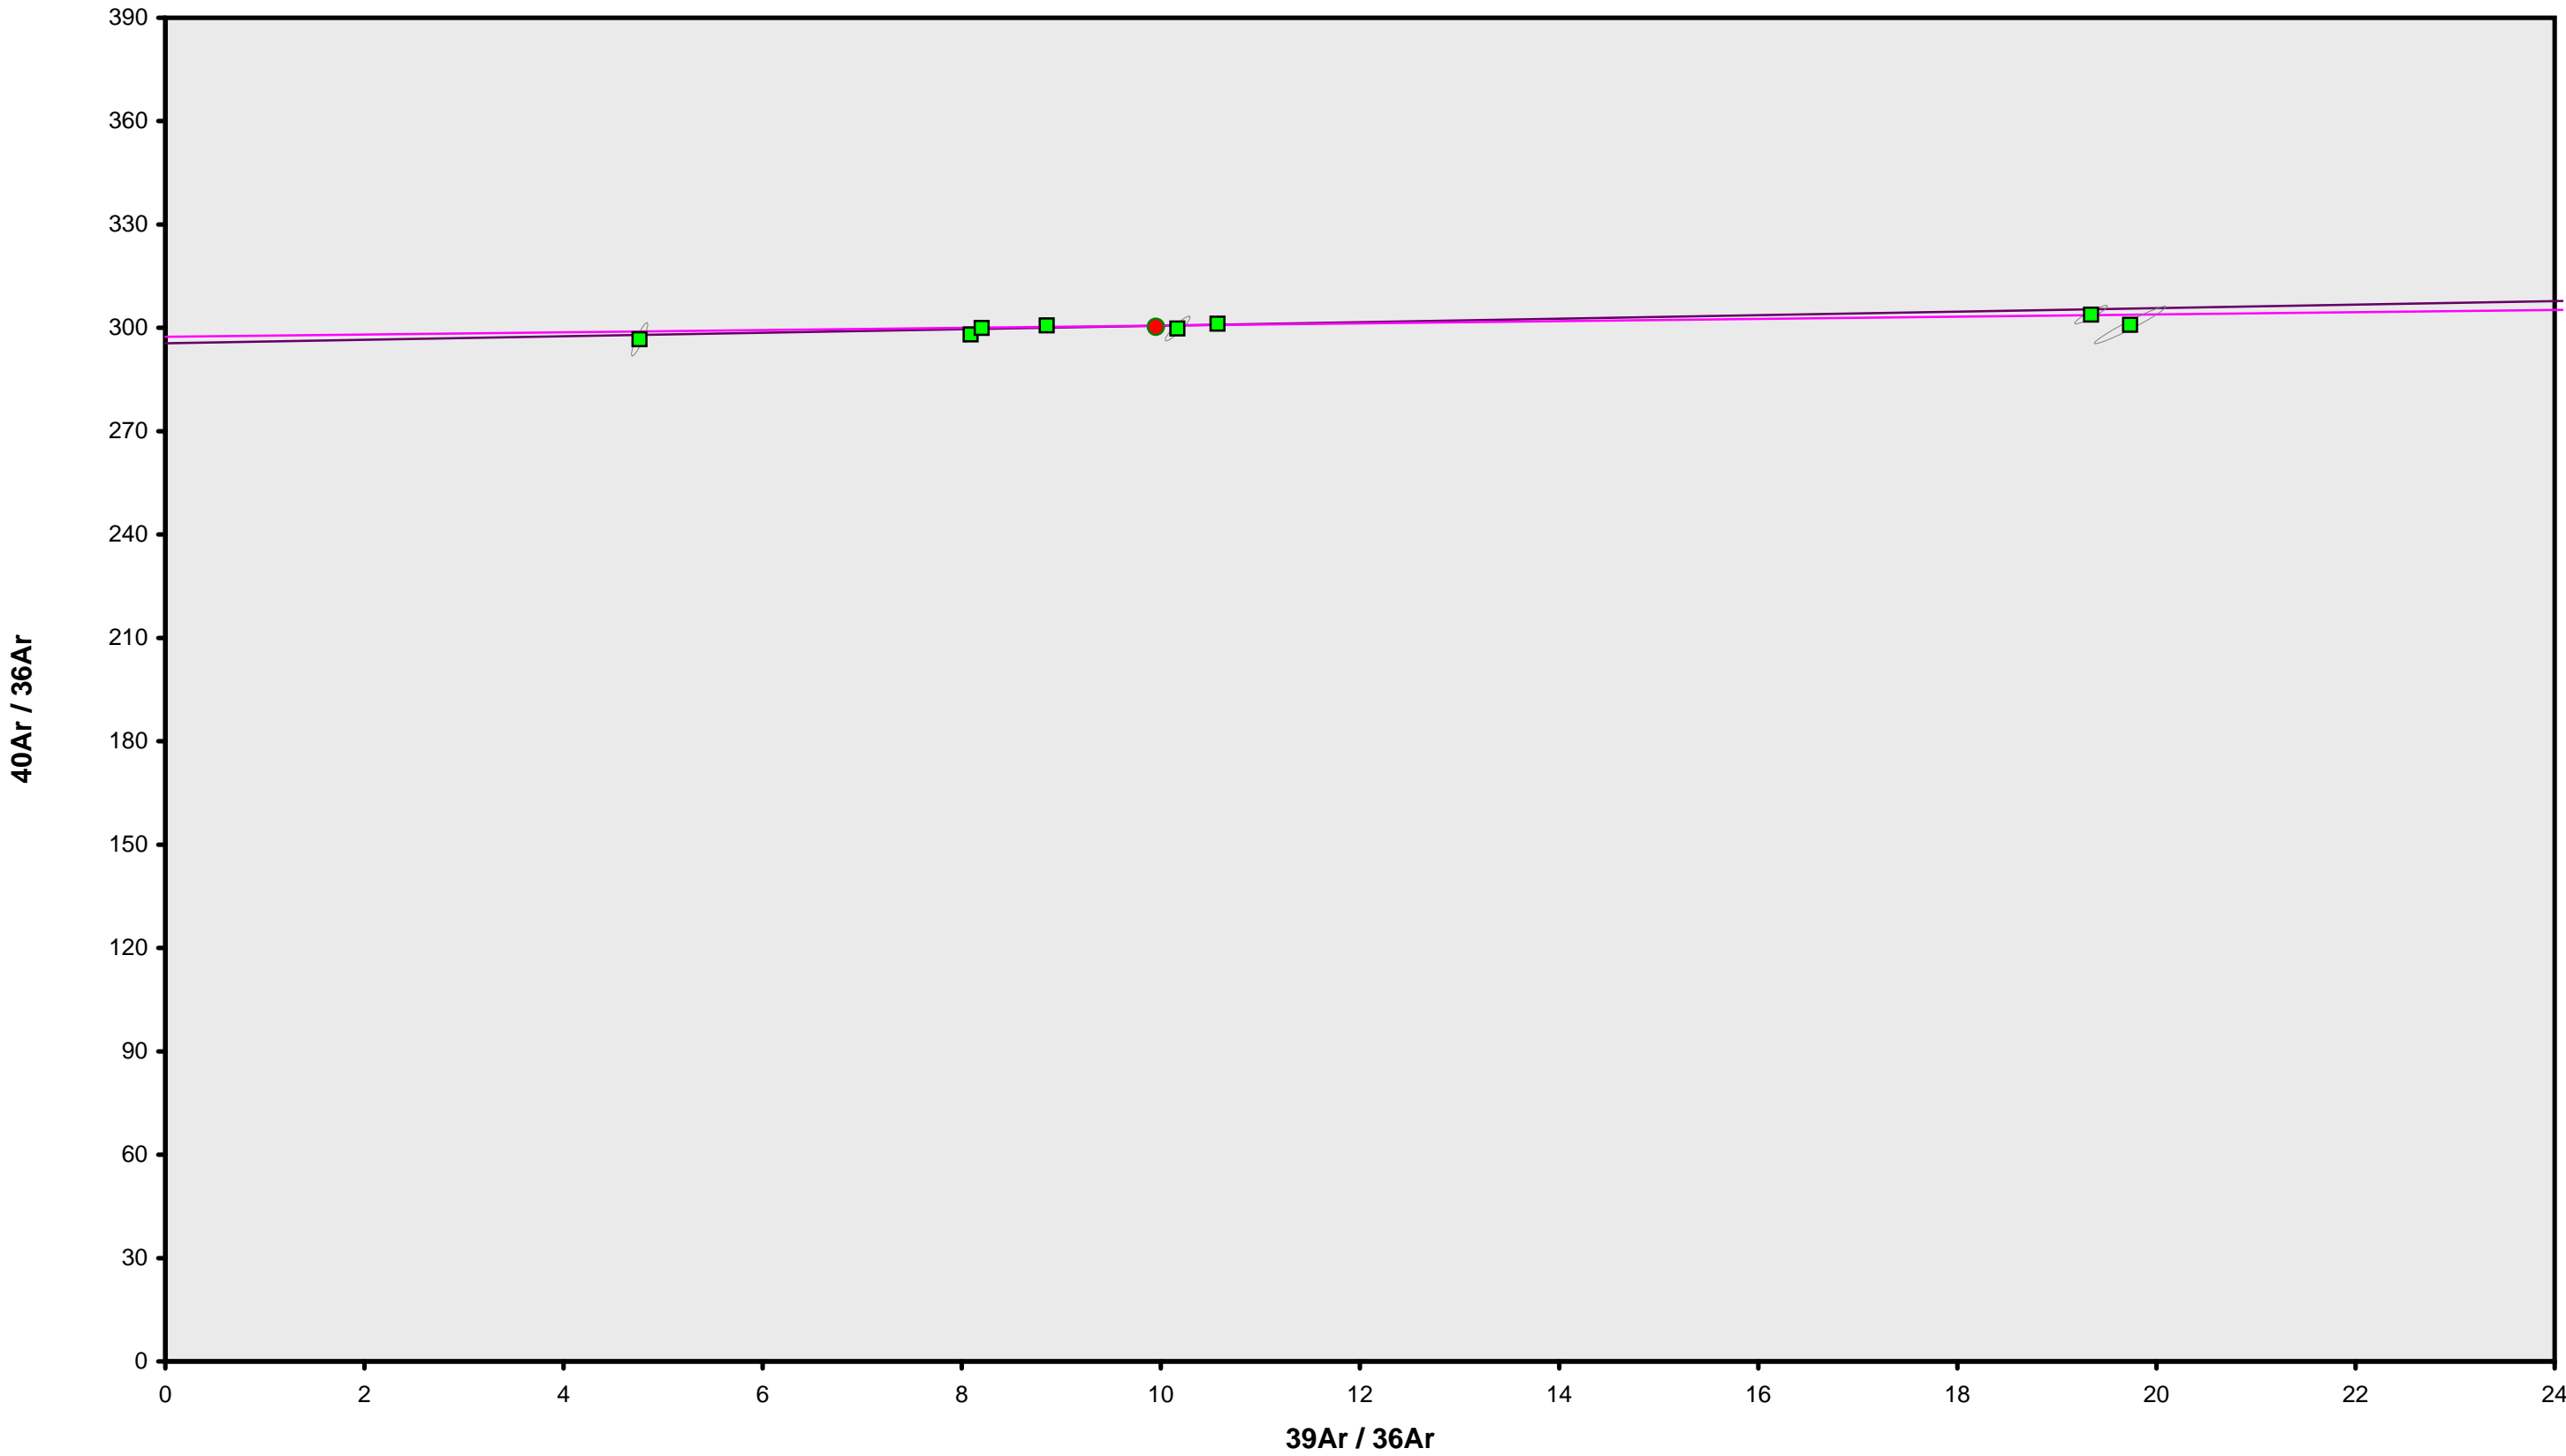

Ar-Ages in Ma

WEIGHTED PLATEAU

1.46 ± 0.19

TOTAL FUSION

1.39 ± 0.19

NORMAL ISOCHRON

0.92 ± 0.66

INVERSE ISOCHRON

0.92 ± 0.49

MSWD (PROBABILITY)

1.10 (36%)

40AR/36AR INTERCEPT

297.4 ± 2.3

Sample Info

Groundmass

Kerguelen Plateau

Kyle Krawl

IRR = OSU2C13

J = 0.00158793 ± 0.00000405

RECALIBRATED AGE



13C2060.AGE >>> 253-12 >>> KERGUELEN PROJECT

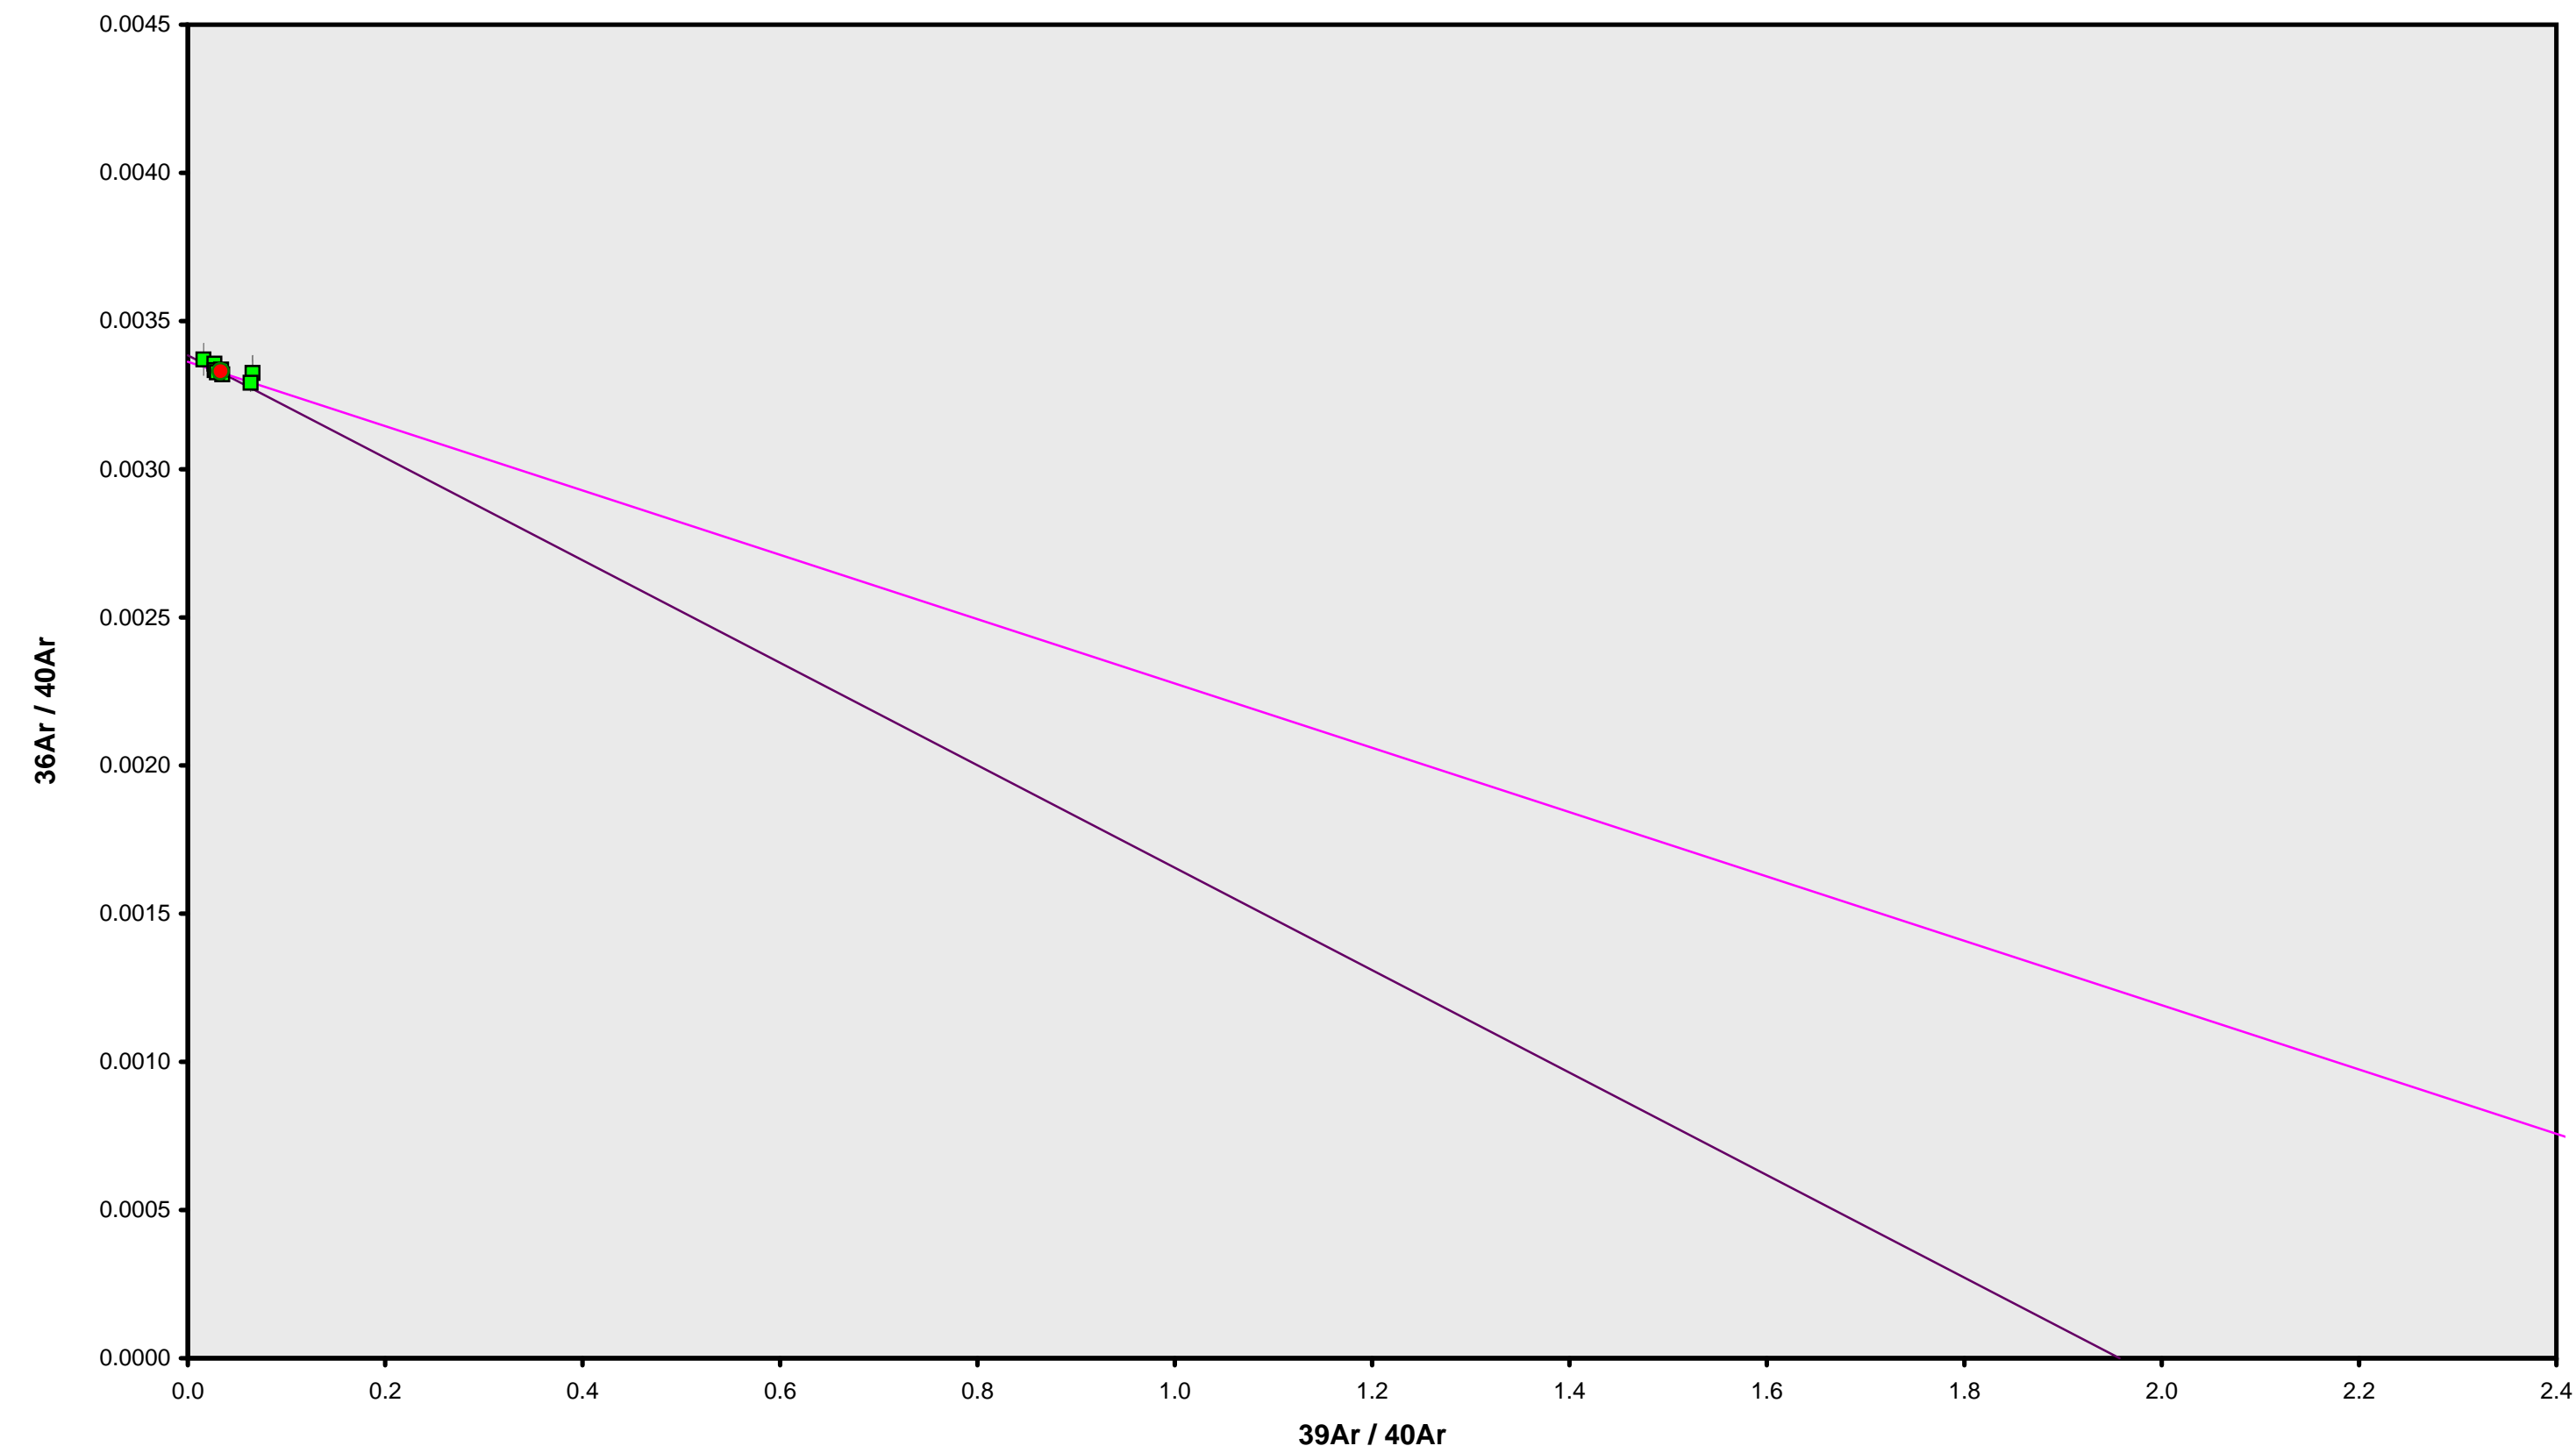

Ar-Ages in Ma

WEIGHTED PLATEAU

$1.46 \pm 0.19$

TOTAL FUSION

$1.39 \pm 0.19$

NORMAL ISOCHRON

$0.92 \pm 0.66$

INVERSE ISOCHRON

$0.92 \pm 0.49$

MSWD (PROBABILITY)

1.09 (36%)

SPREADING FACTOR

1.6%

40AR/36AR INTERCEPT

$297.4 \pm 2.3$

Sample Info

Groundmass

Kerguelen Plateau

Kyle Krawl

IRR = OSU2C13

$J = 0.00158793 \pm 0.00000405$

RECALIBRATED AGE



| Incremental Heating |         |   | 36Ar(a)<br>[V] | 37Ar(ca)<br>[V] | 38Ar(cl)<br>[V] | 39Ar(k)<br>[V] | 40Ar(r)<br>[V] | Age ± 2σ<br>(Ma) | 40Ar(r)<br>(%) | 39Ar(k)<br>(%) | K/Ca ± 2σ     |
|---------------------|---------|---|----------------|-----------------|-----------------|----------------|----------------|------------------|----------------|----------------|---------------|
| 13C2047             | 500 °C  | ✓ | 0.0010531      | 0.0037492       | 0.0000936       | 0.0035224      | 0.0262443      | 21.40 ± 11.41    | 7.78           | 0.87           | 0.404 ± 0.052 |
| 13C2049             | 600 °C  | ✓ | 0.0031621      | 0.0142231       | 0.0000863       | 0.0124282      | 0.0814712      | 18.84 ± 2.75     | 8.02           | 3.07           | 0.376 ± 0.020 |
| 13C2050             | 700 °C  | ✓ | 0.0024568      | 0.0228316       | 0.0000842       | 0.0193009      | 0.1212498      | 18.06 ± 1.61     | 14.31          | 4.76           | 0.364 ± 0.017 |
| 13C2052             | 800 °C  | ✓ | 0.0034023      | 0.0513710       | 0.0000471       | 0.0497646      | 0.3341709      | 19.30 ± 0.88     | 24.95          | 12.28          | 0.417 ± 0.018 |
| 13C2053             | 900 °C  | ✓ | 0.0026344      | 0.0663081       | 0.0000468       | 0.0818726      | 0.5398139      | 18.95 ± 0.41     | 40.95          | 20.19          | 0.531 ± 0.023 |
| 13C2055             | 1050 °C | ✓ | 0.0020027      | 0.1376876       | 0.0003485       | 0.1251635      | 0.8070801      | 18.54 ± 0.23     | 57.69          | 30.87          | 0.391 ± 0.017 |
| 13C2056             | 1250 °C | ✓ | 0.0011817      | 0.2078555       | 0.0003768       | 0.0856788      | 0.5443841      | 18.27 ± 0.26     | 60.92          | 21.13          | 0.177 ± 0.008 |
| 13C2058             | 1400 °C | ✓ | 0.0005542      | 0.0802180       | 0.0001210       | 0.0276796      | 0.1678350      | 17.44 ± 1.77     | 50.61          | 6.83           | 0.148 ± 0.006 |
| Σ                   |         |   | 0.0164473      | 0.5842442       | 0.0012043       | 0.4054106      | 2.6222493      |                  |                |                |               |

| Information on Analysis                                                                                                                                                                                                                        | Results          | 40(r)/39(k) ± 2σ  | Age ± 2σ<br>(Ma)           | MSWD   | 39Ar(k)<br>(%,n)    | K/Ca ± 2σ     |
|------------------------------------------------------------------------------------------------------------------------------------------------------------------------------------------------------------------------------------------------|------------------|-------------------|----------------------------|--------|---------------------|---------------|
| Sample = 177-3<br>Material = Groundmass<br>Location = Kerguelen Plateau<br>Analyst = Trevor Smith<br>Project = KERGUELEN<br>Mass Discrimination Law = LIN<br>Irradiation = OSU2C13<br>J = 0.00160172 ± 0.00000405<br>FCT-3 = 28.201 ± 0.023 Ma | Age Plateau      | 6.44023 ± 0.07602 | 18.51 ± 0.24               | 1.93   | 100.00              | 0.226 ± 0.085 |
|                                                                                                                                                                                                                                                | Recalibrated     | ± 1.18%           | ± 1.28%                    | 6%     | 8                   |               |
|                                                                                                                                                                                                                                                |                  |                   | Full External Error ± 0.48 | 2.07   | 2σ Confidence Limit |               |
|                                                                                                                                                                                                                                                |                  |                   | Analytical Error ± 0.22    | 1.3889 | Error Magnification |               |
|                                                                                                                                                                                                                                                | Total Fusion Age | 6.46813 ± 0.08852 | 18.59 ± 0.27               |        | 8                   | 0.298 ± 0.006 |
|                                                                                                                                                                                                                                                | Recalibrated     | ± 1.37%           | ± 1.45%                    |        |                     |               |
|                                                                                                                                                                                                                                                |                  |                   | Full External Error ± 0.50 |        |                     |               |
|                                                                                                                                                                                                                                                |                  |                   | Analytical Error ± 0.25    |        |                     |               |



| Normal Isochron |         |   | 39(k)/36(a) ± 2σ | 40(a+r)/36(a) ± 2σ | r.i.   |
|-----------------|---------|---|------------------|--------------------|--------|
| 13C2047         | 500 °C  | ✓ | 3.34 ± 0.16      | 320.42 ± 14.49     | 0.9451 |
| 13C2049         | 600 °C  | ✓ | 3.93 ± 0.06      | 321.27 ± 4.10      | 0.8476 |
| 13C2050         | 700 °C  | ✓ | 7.86 ± 0.12      | 344.85 ± 5.15      | 0.9580 |
| 13C2052         | 800 °C  | ✓ | 14.63 ± 0.22     | 393.72 ± 5.96      | 0.9921 |
| 13C2053         | 900 °C  | ✓ | 31.08 ± 0.46     | 500.41 ± 7.44      | 0.9890 |
| 13C2055         | 1050 °C | ✓ | 62.50 ± 1.05     | 698.49 ± 11.70     | 0.9866 |
| 13C2056         | 1250 °C | ✓ | 72.51 ± 1.61     | 756.18 ± 16.74     | 0.9947 |
| 13C2058         | 1400 °C | ✓ | 49.95 ± 5.21     | 598.34 ± 62.35     | 0.9996 |

| Results                                               | 40(a)/36(a) ± 2σ                                                    | 40(r)/39(k) ± 2σ             | Age ± 2σ (Ma)                                          | MSWD                                    |
|-------------------------------------------------------|---------------------------------------------------------------------|------------------------------|--------------------------------------------------------|-----------------------------------------|
| Normal Isochron<br>Recalibrated                       | 297.56 ± 3.68<br>± 1.24%                                            | 6.39367 ± 0.10793<br>± 1.69% | 18.38 ± 0.32<br>± 1.75%                                | 1.87<br>8%                              |
| Full External Error ± 0.52<br>Analytical Error ± 0.31 |                                                                     |                              |                                                        |                                         |
| Statistics                                            | 2σ Confidence Limit<br>Error Magnification<br>Number of Data Points | 2.15<br>1.3680<br>8          | Convergence<br>Number of Iterations<br>Calculated Line | 0.000000053233<br>37<br>Weighted York-2 |



| Inverse Isochron |         |   | 39(k)/40(a+r) ± 2σ    | 36(a)/40(a+r) ± 2σ      | r.i.   |
|------------------|---------|---|-----------------------|-------------------------|--------|
| 13C2047          | 500 °C  | ✓ | 0.0104386 ± 0.0001631 | 0.00312090 ± 0.00014112 | 0.0015 |
| 13C2049          | 600 °C  | ✓ | 0.0122341 ± 0.0000965 | 0.00311269 ± 0.00003969 | 0.0196 |
| 13C2050          | 700 °C  | ✓ | 0.0227809 ± 0.0001009 | 0.00289979 ± 0.00004327 | 0.0290 |
| 13C2052          | 800 °C  | ✓ | 0.0371506 ± 0.0000711 | 0.00253987 ± 0.00003847 | 0.0356 |
| 13C2053          | 900 °C  | ✓ | 0.0621056 ± 0.0001374 | 0.00199836 ± 0.00002972 | 0.0642 |
| 13C2055          | 1050 °C | ✓ | 0.0894734 ± 0.0002457 | 0.00143167 ± 0.00002397 | 0.0545 |
| 13C2056          | 1250 °C | ✓ | 0.0958835 ± 0.0002196 | 0.00132243 ± 0.00002928 | 0.0212 |
| 13C2058          | 1400 °C | ✓ | 0.0834728 ± 0.0002450 | 0.00167128 ± 0.00017415 | 0.0033 |

| Results                                               | 40(a)/36(a) ± 2σ         | 40(r)/39(k) ± 2σ             | Age ± 2σ (Ma)           | MSWD            |
|-------------------------------------------------------|--------------------------|------------------------------|-------------------------|-----------------|
| Inverse Isochron<br>Recalibrated                      | 297.61 ± 3.66<br>± 1.23% | 6.39566 ± 0.10750<br>± 1.68% | 18.39 ± 0.32<br>± 1.75% | 1.84<br>9%      |
| Full External Error ± 0.52<br>Analytical Error ± 0.31 |                          |                              |                         |                 |
|                                                       |                          |                              |                         |                 |
| Statistics                                            | 2σ Confidence Limit      | 2.15                         | Convergence             | 0.0000000255    |
|                                                       | Error Magnification      | 1.3556                       | Number of Iterations    | 4               |
|                                                       | Number of Data Points    | 8                            | Calculated Line         | Weighted York-2 |
|                                                       | Spreading Factor         | 54.6%                        |                         |                 |



| OSU Argon Geochronology Lab |         |   |           |           |           |           |           |           |           |           |           |           |                   |               |             |             |               |
|-----------------------------|---------|---|-----------|-----------|-----------|-----------|-----------|-----------|-----------|-----------|-----------|-----------|-------------------|---------------|-------------|-------------|---------------|
| Relative Abundances         |         |   | 40Ar      |           | 39Ar      |           | 38Ar      |           | 37Ar      |           | 36Ar      |           | 40(r)/39(k) ± 2σ  | Age ± 2σ (Ma) | 40Ar(r) (%) | 39Ar(k) (%) | K/Ca ± 2σ     |
|                             |         |   | [V]       | 1σ        |                   |               |             |             |               |
| 13C2047                     | 500 °C  | ✓ | 0.3374436 | 0.0001741 | 0.0035249 | 0.0000275 | 0.0003310 | 0.0000236 | 0.0037492 | 0.0002374 | 0.0010541 | 0.0000238 | 7.45067 ± 3.99677 | 21.40 ± 11.41 | 7.78        | 0.87        | 0.404 ± 0.052 |
| 13C2049                     | 600 °C  | ✓ | 1.0158795 | 0.0007126 | 0.0124378 | 0.0000482 | 0.0008207 | 0.0000223 | 0.0142231 | 0.0003747 | 0.0031659 | 0.0000200 | 6.55535 ± 0.96095 | 18.84 ± 2.75  | 8.02        | 3.07        | 0.376 ± 0.020 |
| 13C2050                     | 700 °C  | ✓ | 0.8472572 | 0.0005863 | 0.0193162 | 0.0000406 | 0.0007662 | 0.0000235 | 0.0228316 | 0.0005221 | 0.0024629 | 0.0000183 | 6.28209 ± 0.56282 | 18.06 ± 1.61  | 14.31       | 4.76        | 0.364 ± 0.017 |
| 13C2052                     | 800 °C  | ✓ | 1.3395871 | 0.0006803 | 0.0497992 | 0.0000403 | 0.0012565 | 0.0000290 | 0.0513710 | 0.0011133 | 0.0034158 | 0.0000257 | 6.71503 ± 0.30674 | 19.30 ± 0.88  | 24.95       | 12.28       | 0.417 ± 0.018 |
| 13C2053                     | 900 °C  | ✓ | 1.3183622 | 0.0009585 | 0.0819172 | 0.0000683 | 0.0014801 | 0.0000370 | 0.0663081 | 0.0014269 | 0.0026519 | 0.0000195 | 6.59334 ± 0.14310 | 18.95 ± 0.41  | 40.95       | 20.19       | 0.531 ± 0.023 |
| 13C2055                     | 1050 °C | ✓ | 1.3990182 | 0.0011073 | 0.1252562 | 0.0001404 | 0.0021663 | 0.0000237 | 0.1376876 | 0.0029574 | 0.0020392 | 0.0000167 | 6.44820 ± 0.08207 | 18.54 ± 0.23  | 57.69       | 30.87       | 0.391 ± 0.017 |
| 13C2056                     | 1250 °C | ✓ | 0.8936589 | 0.0004630 | 0.0858187 | 0.0000874 | 0.0016016 | 0.0000215 | 0.2078555 | 0.0044540 | 0.0012366 | 0.0000130 | 6.35378 ± 0.09171 | 18.27 ± 0.26  | 60.92       | 21.13       | 0.177 ± 0.008 |
| 13C2058                     | 1400 °C | ✓ | 0.3316279 | 0.0001661 | 0.0277336 | 0.0000382 | 0.0005508 | 0.0000313 | 0.0802180 | 0.0017493 | 0.0005754 | 0.0000289 | 6.06349 ± 0.61683 | 17.44 ± 1.77  | 50.61       | 6.83        | 0.148 ± 0.006 |
| Σ                           |         |   | 7.4828344 | 0.0019317 | 0.4058038 | 0.0001995 | 0.0089731 | 0.0000763 | 0.5842442 | 0.0059489 | 0.0166018 | 0.0000602 |                   |               |             |             |               |

| Information on Analysis and Constants Used in Calculations |                                                                 | Results          |                  |               |      |               |           |  |
|------------------------------------------------------------|-----------------------------------------------------------------|------------------|------------------|---------------|------|---------------|-----------|--|
|                                                            |                                                                 | 40(a)/36(a) ± 2σ | 40(r)/39(k) ± 2σ | Age ± 2σ (Ma) | MSWD | 39Ar(k) (%.n) | K/Ca ± 2σ |  |
| Sample = 177-3                                             | Age Equations = Min et al. (2000)                               |                  |                  |               |      |               |           |  |
| Material = Groundmass                                      | Negative Intensities = Allowed                                  |                  |                  |               |      |               |           |  |
| Location = Kerguelen Plateau                               | Decay Constant 40K = 5.543 ± 0.044 E-10 1/a                     |                  |                  |               |      |               |           |  |
| Analyst = Trevor Smith                                     | Decay Constant 39Ar = 2.940 ± 0.029 E-07 1/h                    |                  |                  |               |      |               |           |  |
| Project = KERGUELEN                                        | Decay Constant 37Ar = 8.230 ± 0.082 E-04 1/h                    |                  |                  |               |      |               |           |  |
| Mass Discrimination Law = LIN                              | Decay Constant 36Cl = 2.236 ± 0.045 E-06 1/a                    |                  |                  |               |      |               |           |  |
| Irradiation = OSU2C13                                      | Decay Constant 40K(EC,β <sup>+</sup> ) = 0.580 ± 0.009 E-10 1/a |                  |                  |               |      |               |           |  |
| J = 0.00160172 ± 0.00000405                                | Decay Constant 40K(β <sup>-</sup> ) = 4.950 ± 0.043 E-10 1/a    |                  |                  |               |      |               |           |  |
| FCT-3 = 28.201 ± 0.023 Ma                                  | Atmospheric Ratio 40/36(a) = 295.50                             |                  |                  |               |      |               |           |  |
| IGSN = Undefined                                           | Atmospheric Ratio 38/36(a) = 0.1869                             |                  |                  |               |      |               |           |  |
| Preferred Age = Undefined                                  | Production Ratio 39/37(ca) = 0.000673                           |                  |                  |               |      |               |           |  |
| Classification = Undefined                                 | Production Ratio 38/37(ca) = 0.000139                           |                  |                  |               |      |               |           |  |
| Experiment Type = Undefined                                | Production Ratio 36/37(ca) = 0.000264                           |                  |                  |               |      |               |           |  |
| Extraction Method = Undefined                              | Production Ratio 40/39(k) = 0.001010                            |                  |                  |               |      |               |           |  |
| Heating = 0 sec                                            | Production Ratio 38/39(k) = 0.011380                            |                  |                  |               |      |               |           |  |
| Isolation = 15.00 min                                      | Production Ratio 36/38(cl) = 316.00 ± 15.80                     |                  |                  |               |      |               |           |  |
| Instrument = MAP215-50                                     | Scaling Ratio K/Ca = 0.430                                      |                  |                  |               |      |               |           |  |
| Lithology = Undefined                                      | Abundance Ratio 40K/K = 1.1700 ± 0.0199 E-04                    |                  |                  |               |      |               |           |  |
| Lat-Lon = Undefined - Undefined                            | Atomic Weight K = 39.0983 ± 0.0001 g                            |                  |                  |               |      |               |           |  |
| R1 ratio = Undefined                                       | Recalibrated to FCT-3 Secondary Standard                        |                  |                  |               |      |               |           |  |
| R2 ratio = Undefined                                       | Standard Age = 28.201 ± 0.023 Ma                                |                  |                  |               |      |               |           |  |
| R3 ratio = Undefined                                       |                                                                 |                  |                  |               |      |               |           |  |
| R4 ratio = Undefined                                       |                                                                 |                  |                  |               |      |               |           |  |
| R5 ratio = Undefined                                       |                                                                 |                  |                  |               |      |               |           |  |
| Collector Calibrations =                                   |                                                                 |                  |                  |               |      |               |           |  |



| OSU Argon Geochronology Lab |         |         |                |           |                |           |                 |           |                 |           |                 |           |                |           |                |           |                |           |                 |           |                 |           |                |           |                 |           |                |           |                |           |                |           |                |           |      |
|-----------------------------|---------|---------|----------------|-----------|----------------|-----------|-----------------|-----------|-----------------|-----------|-----------------|-----------|----------------|-----------|----------------|-----------|----------------|-----------|-----------------|-----------|-----------------|-----------|----------------|-----------|-----------------|-----------|----------------|-----------|----------------|-----------|----------------|-----------|----------------|-----------|------|
| Degassing<br>Patterns       |         |         | 36Ar(a)<br>[V] | %1σ       | 36Ar(c)<br>[V] | %1σ       | 36Ar(ca)<br>[V] | %1σ       | 36Ar(cl)<br>[V] | %1σ       | 37Ar(ca)<br>[V] | %1σ       | 38Ar(a)<br>[V] | %1σ       | 38Ar(c)<br>[V] | %1σ       | 38Ar(k)<br>[V] | %1σ       | 38Ar(ca)<br>[V] | %1σ       | 38Ar(cl)<br>[V] | %1σ       | 39Ar(k)<br>[V] | %1σ       | 39Ar(ca)<br>[V] | %1σ       | 40Ar(r)<br>[V] | %1σ       | 40Ar(a)<br>[V] | %1σ       | 40Ar(c)<br>[V] | %1σ       | 40Ar(k)<br>[V] | %1σ       |      |
|                             | 13C2047 | 500 °C  | ✓              | 0.0010531 | 2.26           | 0.0000000 | 0.00            | 0.0000010 | 6.33            | 0.0000000 | 26.19           | 0.0037492 | 6.33           | 0.0001968 | 2.26           | 0.0000000 | 0.00           | 0.0000401 | 0.78            | 0.0000005 | 6.33            | 0.0000936 | 26.74          | 0.0035224 | 0.78            | 0.0000025 | 6.33           | 0.0262443 | 26.81          | 0.3111957 | 2.26           | 0.0000000 | 0.00           | 0.0000036 | 0.78 |
|                             | 13C2049 | 600 °C  | ✓              | 0.0031621 | 0.63           | 0.0000000 | 0.00            | 0.0000038 | 2.63            | 0.0000000 | 26.75           | 0.0142231 | 2.63           | 0.0005910 | 0.63           | 0.0000000 | 0.00           | 0.0001414 | 0.39            | 0.0000020 | 2.63            | 0.0000863 | 27.29          | 0.0124282 | 0.39            | 0.0000096 | 2.63           | 0.0814712 | 7.32           | 0.9343957 | 0.63           | 0.0000000 | 0.00           | 0.0000126 | 0.39 |
|                             | 13C2050 | 700 °C  | ✓              | 0.0024568 | 0.74           | 0.0000000 | 0.00            | 0.0000060 | 2.29            | 0.0000000 | 28.76           | 0.0228316 | 2.29           | 0.0004592 | 0.74           | 0.0000000 | 0.00           | 0.0002196 | 0.21            | 0.0000032 | 2.29            | 0.0000842 | 29.26          | 0.0193009 | 0.21            | 0.0000154 | 2.29           | 0.1212498 | 4.47           | 0.7259878 | 0.74           | 0.0000000 | 0.00           | 0.0000195 | 0.21 |
|                             | 13C2052 | 800 °C  | ✓              | 0.0034023 | 0.76           | 0.0000000 | 0.00            | 0.0000136 | 2.17            | 0.0000000 | 62.69           | 0.0513710 | 2.17           | 0.0006359 | 0.76           | 0.0000000 | 0.00           | 0.0005663 | 0.08            | 0.0000071 | 2.17            | 0.0000471 | 62.92          | 0.0497646 | 0.08            | 0.0000346 | 2.17           | 0.3341709 | 2.28           | 1.0053659 | 0.76           | 0.0000000 | 0.00           | 0.0000503 | 0.08 |
|                             | 13C2053 | 900 °C  | ✓              | 0.0026344 | 0.74           | 0.0000000 | 0.00            | 0.0000175 | 2.15            | 0.0000000 | 79.60           | 0.0663081 | 2.15           | 0.0004924 | 0.74           | 0.0000000 | 0.00           | 0.0009317 | 0.08            | 0.0000092 | 2.15            | 0.0000468 | 79.78          | 0.0818726 | 0.08            | 0.0000446 | 2.15           | 0.5398139 | 1.08           | 0.7784656 | 0.74           | 0.0000000 | 0.00           | 0.0000827 | 0.08 |
|                             | 13C2055 | 1050 °C | ✓              | 0.0020027 | 0.83           | 0.0000000 | 0.00            | 0.0000363 | 2.15            | 0.0000001 | 8.74            | 0.1376876 | 2.15           | 0.0003743 | 0.83           | 0.0000000 | 0.00           | 0.0014244 | 0.11            | 0.0000191 | 2.15            | 0.0003485 | 10.26          | 0.1251635 | 0.11            | 0.0000927 | 2.15           | 0.8070801 | 0.63           | 0.5918117 | 0.83           | 0.0000000 | 0.00           | 0.0001264 | 0.11 |
|                             | 13C2056 | 1250 °C | ✓              | 0.0011817 | 1.11           | 0.0000000 | 0.00            | 0.0000549 | 2.14            | 0.0000001 | 7.88            | 0.2078555 | 2.14           | 0.0002209 | 1.11           | 0.0000000 | 0.00           | 0.0009750 | 0.10            | 0.0000289 | 2.14            | 0.0003768 | 9.54           | 0.0856788 | 0.10            | 0.0001399 | 2.14           | 0.5443841 | 0.71           | 0.3491883 | 1.11           | 0.0000000 | 0.00           | 0.0000865 | 0.10 |
|                             | 13C2058 | 1400 °C | ✓              | 0.0005542 | 5.21           | 0.0000000 | 0.00            | 0.0000212 | 2.18            | 0.0000000 | 26.78           | 0.0802180 | 2.18           | 0.0001036 | 5.21           | 0.0000000 | 0.00           | 0.0003150 | 0.14            | 0.0000112 | 2.18            | 0.0001210 | 27.32          | 0.0276796 | 0.14            | 0.0000540 | 2.18           | 0.1678350 | 5.08           | 0.1637650 | 5.21           | 0.0000000 | 0.00           | 0.0000280 | 0.14 |
|                             |         | Σ       |                | 0.0164473 | 0.37           | 0.0000000 | 0.00            | 0.0001542 | 1.02            | 0.0000003 | 6.86            | 0.5842442 | 1.02           | 0.0030740 | 0.37           | 0.0000000 | 0.00           | 0.0046136 | 0.05            | 0.0000812 | 1.02            | 0.0012043 | 7.30           | 0.4054106 | 0.05            | 0.0003932 | 1.02           | 2.6222493 | 0.68           | 4.8601757 | 0.37           | 0.0000000 | 0.00           | 0.0004095 | 0.05 |
|                             | Σ       |         |                |           |                |           |                 |           | 0.0166018       | 0.36      | 0.5842442       | 1.02      |                |           |                |           |                |           |                 |           | 0.0089731       | 0.99      |                |           | 0.4058038       | 0.05      |                |           |                |           |                |           | 7.4828344      | 0.34      |      |



| Additional<br>Parameters |         |   | 40Ar/39Ar | 1σ       | 37Ar/39Ar | 1σ       | 36Ar/39Ar | 1σ       | Time<br>(days) | 37Ar<br>(decay) | 39Ar<br>(decay) | 40Ar<br>(moles) |
|--------------------------|---------|---|-----------|----------|-----------|----------|-----------|----------|----------------|-----------------|-----------------|-----------------|
| 13C2047                  | 500 °C  | ✓ | 95.730398 | 0.747127 | 1.063631  | 0.067844 | 0.299048  | 0.007143 | 107.885        | 8.443585        | 1.00076241      | 6.749E-14       |
| 13C2049                  | 600 °C  | ✓ | 81.676911 | 0.321795 | 1.143537  | 0.030453 | 0.254535  | 0.001889 | 107.921        | 8.449610        | 1.00076266      | 2.032E-13       |
| 13C2050                  | 700 °C  | ✓ | 43.862435 | 0.097086 | 1.181989  | 0.027141 | 0.127502  | 0.000982 | 107.940        | 8.452740        | 1.00076279      | 1.695E-13       |
| 13C2052                  | 800 °C  | ✓ | 26.899775 | 0.025718 | 1.031564  | 0.022372 | 0.068592  | 0.000519 | 107.976        | 8.458771        | 1.00076305      | 2.679E-13       |
| 13C2053                  | 900 °C  | ✓ | 16.093837 | 0.017800 | 0.809453  | 0.017432 | 0.032373  | 0.000239 | 107.996        | 8.462137        | 1.00076319      | 2.637E-13       |
| 13C2055                  | 1050 °C | ✓ | 11.169252 | 0.015324 | 1.099248  | 0.023643 | 0.016280  | 0.000134 | 108.032        | 8.468174        | 1.00076345      | 2.798E-13       |
| 13C2056                  | 1250 °C | ✓ | 10.413336 | 0.011903 | 2.422031  | 0.051958 | 0.014410  | 0.000152 | 108.050        | 8.471195        | 1.00076357      | 1.787E-13       |
| 13C2058                  | 1400 °C | ✓ | 11.957633 | 0.017508 | 2.892451  | 0.063202 | 0.020747  | 0.001041 | 108.085        | 8.477007        | 1.00076382      | 6.633E-14       |



| Procedure |         | 36Ar      |           | 37Ar      |           | 38Ar      |           | 39Ar      |           | 40Ar      |           |
|-----------|---------|-----------|-----------|-----------|-----------|-----------|-----------|-----------|-----------|-----------|-----------|
|           |         | [V]       | 1σ        |
| 13C2047   | 500 °C  | 0.0003280 | 0.0000150 | 0.0000714 | 0.0000217 | 0.0000074 | 0.0000134 | 0.0003012 | 0.0000122 | 0.0040857 | 0.0000301 |
| 13C2049   | 600 °C  | 0.0003019 | 0.0000149 | 0.0000150 | 0.0000169 | 0.0000339 | 0.0000202 | 0.0000416 | 0.0000201 | 0.0047574 | 0.0000179 |
| 13C2050   | 700 °C  | 0.0003019 | 0.0000149 | 0.0000150 | 0.0000169 | 0.0000339 | 0.0000202 | 0.0000416 | 0.0000201 | 0.0047574 | 0.0000179 |
| 13C2052   | 800 °C  | 0.0003516 | 0.0000196 | 0.0000493 | 0.0000143 | 0.0000737 | 0.0000250 | 0.0001379 | 0.0000251 | 0.0070395 | 0.0000346 |
| 13C2053   | 900 °C  | 0.0003516 | 0.0000196 | 0.0000493 | 0.0000143 | 0.0000737 | 0.0000250 | 0.0001379 | 0.0000251 | 0.0070395 | 0.0000346 |
| 13C2055   | 1050 °C | 0.0003203 | 0.0000122 | 0.0000460 | 0.0000197 | 0.0000051 | 0.0000149 | 0.0001775 | 0.0000199 | 0.0042124 | 0.0000719 |
| 13C2056   | 1250 °C | 0.0003203 | 0.0000122 | 0.0000460 | 0.0000197 | 0.0000051 | 0.0000149 | 0.0001775 | 0.0000199 | 0.0042124 | 0.0000719 |
| 13C2058   | 1400 °C | 0.0003056 | 0.0000180 | 0.0000350 | 0.0000213 | 0.0000174 | 0.0000211 | 0.0000808 | 0.0000218 | 0.0039479 | 0.0000507 |



| OSU Argon Geochronology Lab |         |           |           |        |            |           |           |        |          |           |           |        |             |           |           |        |             |           |           |        |             |
|-----------------------------|---------|-----------|-----------|--------|------------|-----------|-----------|--------|----------|-----------|-----------|--------|-------------|-----------|-----------|--------|-------------|-----------|-----------|--------|-------------|
| Intercept Values            |         | 36Ar      |           |        |            | 37Ar      |           |        |          | 38Ar      |           |        |             | 39Ar      |           |        |             | 40Ar      |           |        |             |
|                             |         | [M]       | 1σ        | r2     |            | [M]       | 1σ        | r2     |          | [M]       | 1σ        | r2     |             | [M]       | 1σ        | r2     |             | [M]       | 1σ        | r2     |             |
| 13C2047                     | 500 °C  | 0.0014236 | 0.0000196 | 0.7330 | LIN #      | 0.0005287 | 0.0000164 | 0.3279 | LIN # 10 | 0.0003303 | 0.0000200 | 0.3381 | LIN #       | 0.0038632 | 0.0000249 | 0.9931 | EXP #       | 0.3421794 | 0.0001718 | 0.9993 | EXP # 1     |
| 13C2049                     | 600 °C  | 0.0035910 | 0.0000145 | 0.9722 | LIN #      | 0.0017480 | 0.0000207 | 0.1415 | LIN # 7  | 0.0008714 | 0.0000103 | 0.0455 | LIN # 7     | 0.0126080 | 0.0000444 | 0.9949 | EXP #       | 1.0225797 | 0.0007137 | 0.9987 | EXP #       |
| 13C2050                     | 700 °C  | 0.0028605 | 0.0000116 | 0.9698 | EXP # 8    | 0.0027956 | 0.0000153 | 0.9293 | EXP # 10 | 0.0008157 | 0.0000129 | 0.2308 | LIN # 4 5 8 | 0.0195556 | 0.0000358 | 0.9900 | EXP # 1 7 9 | 0.8535509 | 0.0005871 | 0.9988 | EXP # 2     |
| 13C2052                     | 800 °C  | 0.0039004 | 0.0000181 | 0.9787 | LIN # 1 3  | 0.0063018 | 0.0000183 | 0.9873 | EXP #    | 0.0013558 | 0.0000158 | 0.5076 | LIN # 2     | 0.0504519 | 0.0000321 | 0.9929 | EXP #       | 1.3491901 | 0.0006808 | 0.9995 | EXP # 2     |
| 13C2053                     | 900 °C  | 0.0031069 | 0.0000049 | 0.9948 | LIN # 3 8  | 0.0081165 | 0.0000159 | 0.9950 | EXP #    | 0.0015840 | 0.0000282 | 0.1755 | LIN #       | 0.0829018 | 0.0000642 | 0.9983 | EXP # 8 10  | 1.3279248 | 0.0009597 | 0.9985 | EXP #       |
| 13C2055                     | 1050 °C | 0.0024390 | 0.0000123 | 0.8846 | LIN # 1 5  | 0.0167854 | 0.0000317 | 0.9967 | EXP #    | 0.0022155 | 0.0000190 | 0.8459 | LIN #       | 0.1267281 | 0.0001404 | 0.9983 | EXP # 7 8   | 1.4059018 | 0.0011071 | 0.9989 | EXP # 2 3   |
| 13C2056                     | 1250 °C | 0.0016053 | 0.0000058 | 0.8553 | LIN # 8 10 | 0.0253045 | 0.0000359 | 0.9984 | EXP #    | 0.0016391 | 0.0000161 | 0.7856 | LIN #       | 0.0868744 | 0.0000860 | 0.9982 | EXP #       | 0.8994904 | 0.0004582 | 0.9996 | EXP # 2 3 4 |
| 13C2058                     | 1400 °C | 0.0009038 | 0.0000240 | 0.1959 | LIN # 8    | 0.0097764 | 0.0000363 | 0.9882 | EXP #    | 0.0005794 | 0.0000239 | 0.1848 | LIN #       | 0.0280982 | 0.0000318 | 0.9969 | EXP # 5     | 0.3361810 | 0.0001585 | 0.9991 | EXP # 1     |



| OSU Argon Geochronology Lab |         |         |        |            |                   |              |      |                  |                     |       |                       |                       |     |            |       |                  |     |        |       |                 |                           |     |       |      |      |     |        |             |       |       |         |           |            |     |
|-----------------------------|---------|---------|--------|------------|-------------------|--------------|------|------------------|---------------------|-------|-----------------------|-----------------------|-----|------------|-------|------------------|-----|--------|-------|-----------------|---------------------------|-----|-------|------|------|-----|--------|-------------|-------|-------|---------|-----------|------------|-----|
| Sample<br>Parameters        |         |         | Sample | Material   | Location          | Analyst      | Temp | Standard<br>Name | Standard<br>(in Ma) | %1σ   | Standard<br>Reference | Standard<br>40Ar/39Ar | %1σ | J          | %1σ   | Air<br>40Ar/36Ar | %1σ | MDF    | %1σ   | Volume<br>Ratio | Sensitivity<br>(mol/volt) | Day | Month | Year | Hour | Min | Resist | Irradiation | X-pos | Y-pos | Z/H-pos | Project   | Experiment | Nmb |
|                             | 13C2047 | 500 °C  | 177-3  | Groundmass | Kerguelen Plateau | Trevor Smith | 500  | FCT-3            | 28.201              | 0.083 | Kuiper et al., 2008   |                       |     | 0.00160172 | 0.253 |                  |     | 1.0092 | 0.001 | 0.9981          | 2E-13                     | 22  | JUL   | 2013 | 13   | 15  | 1      | OSU2C13     | 0.00  | 0.00  | 34.60   | Kerguelen | 13C2047    | 01  |
|                             | 13C2049 | 600 °C  | 177-3  | Groundmass | Kerguelen Plateau | Trevor Smith | 600  | FCT-3            | 28.201              | 0.083 | Kuiper et al., 2008   |                       |     | 0.00160172 | 0.253 |                  |     | 1.0092 | 0.001 | 0.9981          | 2E-13                     | 22  | JUL   | 2013 | 14   | 7   | 1      | OSU2C13     | 0.00  | 0.00  | 34.60   | Kerguelen | 13C2047    | 01  |
|                             | 13C2050 | 700 °C  | 177-3  | Groundmass | Kerguelen Plateau | Trevor Smith | 700  | FCT-3            | 28.201              | 0.083 | Kuiper et al., 2008   |                       |     | 0.00160172 | 0.253 |                  |     | 1.0092 | 0.001 | 0.9982          | 2E-13                     | 22  | JUL   | 2013 | 14   | 34  | 1      | OSU2C13     | 0.00  | 0.00  | 34.60   | Kerguelen | 13C2047    | 01  |
|                             | 13C2052 | 800 °C  | 177-3  | Groundmass | Kerguelen Plateau | Trevor Smith | 800  | FCT-3            | 28.201              | 0.083 | Kuiper et al., 2008   |                       |     | 0.00160172 | 0.253 |                  |     | 1.0092 | 0.001 | 0.9981          | 2E-13                     | 22  | JUL   | 2013 | 15   | 26  | 1      | OSU2C13     | 0.00  | 0.00  | 34.60   | Kerguelen | 13C2047    | 01  |
|                             | 13C2053 | 900 °C  | 177-3  | Groundmass | Kerguelen Plateau | Trevor Smith | 900  | FCT-3            | 28.201              | 0.083 | Kuiper et al., 2008   |                       |     | 0.00160172 | 0.253 |                  |     | 1.0092 | 0.001 | 0.9981          | 2E-13                     | 22  | JUL   | 2013 | 15   | 55  | 1      | OSU2C13     | 0.00  | 0.00  | 34.60   | Kerguelen | 13C2047    | 01  |
|                             | 13C2055 | 1050 °C | 177-3  | Groundmass | Kerguelen Plateau | Trevor Smith | 1050 | FCT-3            | 28.201              | 0.083 | Kuiper et al., 2008   |                       |     | 0.00160172 | 0.253 |                  |     | 1.0092 | 0.001 | 0.9981          | 2E-13                     | 22  | JUL   | 2013 | 16   | 47  | 1      | OSU2C13     | 0.00  | 0.00  | 34.60   | Kerguelen | 13C2047    | 01  |
|                             | 13C2056 | 1250 °C | 177-3  | Groundmass | Kerguelen Plateau | Trevor Smith | 1250 | FCT-3            | 28.201              | 0.083 | Kuiper et al., 2008   |                       |     | 0.00160172 | 0.253 |                  |     | 1.0092 | 0.001 | 0.9982          | 2E-13                     | 22  | JUL   | 2013 | 17   | 13  | 1      | OSU2C13     | 0.00  | 0.00  | 34.60   | Kerguelen | 13C2047    | 01  |
| 13C2058                     | 1400 °C | 177-3   |        | Groundmass | Kerguelen Plateau | Trevor Smith | 1400 | FCT-3            | 28.201              | 0.083 | Kuiper et al., 2008   |                       |     | 0.00160172 | 0.253 |                  |     | 1.0092 | 0.001 | 0.9982          | 2E-13                     | 22  | JUL   | 2013 | 18   | 3   | 1      | OSU2C13     | 0.00  | 0.00  | 34.60   | Kerguelen | 13C2047    | 01  |



| Irradiation<br>Constants |         | OSU Argon Geochronology Lab |     |          |     |          |     |          |     |           |     |           |     |           |     |          |     |          |     |           |     |      |     |      |     |       |     |   |
|--------------------------|---------|-----------------------------|-----|----------|-----|----------|-----|----------|-----|-----------|-----|-----------|-----|-----------|-----|----------|-----|----------|-----|-----------|-----|------|-----|------|-----|-------|-----|---|
|                          |         | 40/36(a)                    | %1σ | 40/36(c) | %1σ | 38/36(a) | %1σ | 38/36(c) | %1σ | 39/37(ca) | %1σ | 38/37(ca) | %1σ | 36/37(ca) | %1σ | 40/39(k) | %1σ | 38/39(k) | %1σ | 36/38(cl) | %1σ | K/Ca | %1σ | K/Cl | %1σ | Ca/Cl | %1σ |   |
| 13C2047                  | 500 °C  | 295.5                       | 0   | 0.018    | 35  | 0.1869   | 0   | 1.493    | 3   | 0.000673  | 0   | 0.000139  | 0   | 0.000264  | 0   | 0.00101  | 0   | 0.01138  | 0   | 0         | 0   | 0.43 | 0   | 0    | 0   | 0     | 0   | 0 |
| 13C2049                  | 600 °C  | 295.5                       | 0   | 0.018    | 35  | 0.1869   | 0   | 1.493    | 3   | 0.000673  | 0   | 0.000139  | 0   | 0.000264  | 0   | 0.00101  | 0   | 0.01138  | 0   | 0         | 0   | 0.43 | 0   | 0    | 0   | 0     | 0   | 0 |
| 13C2050                  | 700 °C  | 295.5                       | 0   | 0.018    | 35  | 0.1869   | 0   | 1.493    | 3   | 0.000673  | 0   | 0.000139  | 0   | 0.000264  | 0   | 0.00101  | 0   | 0.01138  | 0   | 0         | 0   | 0.43 | 0   | 0    | 0   | 0     | 0   | 0 |
| 13C2052                  | 800 °C  | 295.5                       | 0   | 0.018    | 35  | 0.1869   | 0   | 1.493    | 3   | 0.000673  | 0   | 0.000139  | 0   | 0.000264  | 0   | 0.00101  | 0   | 0.01138  | 0   | 0         | 0   | 0.43 | 0   | 0    | 0   | 0     | 0   | 0 |
| 13C2053                  | 900 °C  | 295.5                       | 0   | 0.018    | 35  | 0.1869   | 0   | 1.493    | 3   | 0.000673  | 0   | 0.000139  | 0   | 0.000264  | 0   | 0.00101  | 0   | 0.01138  | 0   | 0         | 0   | 0.43 | 0   | 0    | 0   | 0     | 0   | 0 |
| 13C2055                  | 1050 °C | 295.5                       | 0   | 0.018    | 35  | 0.1869   | 0   | 1.493    | 3   | 0.000673  | 0   | 0.000139  | 0   | 0.000264  | 0   | 0.00101  | 0   | 0.01138  | 0   | 0         | 0   | 0.43 | 0   | 0    | 0   | 0     | 0   | 0 |
| 13C2056                  | 1250 °C | 295.5                       | 0   | 0.018    | 35  | 0.1869   | 0   | 1.493    | 3   | 0.000673  | 0   | 0.000139  | 0   | 0.000264  | 0   | 0.00101  | 0   | 0.01138  | 0   | 0         | 0   | 0.43 | 0   | 0    | 0   | 0     | 0   | 0 |
| 13C2058                  | 1400 °C | 295.5                       | 0   | 0.018    | 35  | 0.1869   | 0   | 1.493    | 3   | 0.000673  | 0   | 0.000139  | 0   | 0.000264  | 0   | 0.00101  | 0   | 0.01138  | 0   | 0         | 0   | 0.43 | 0   | 0    | 0   | 0     | 0   | 0 |



13C2047.AGE >>> 177-3 >>> KERGUELEN PROJECT

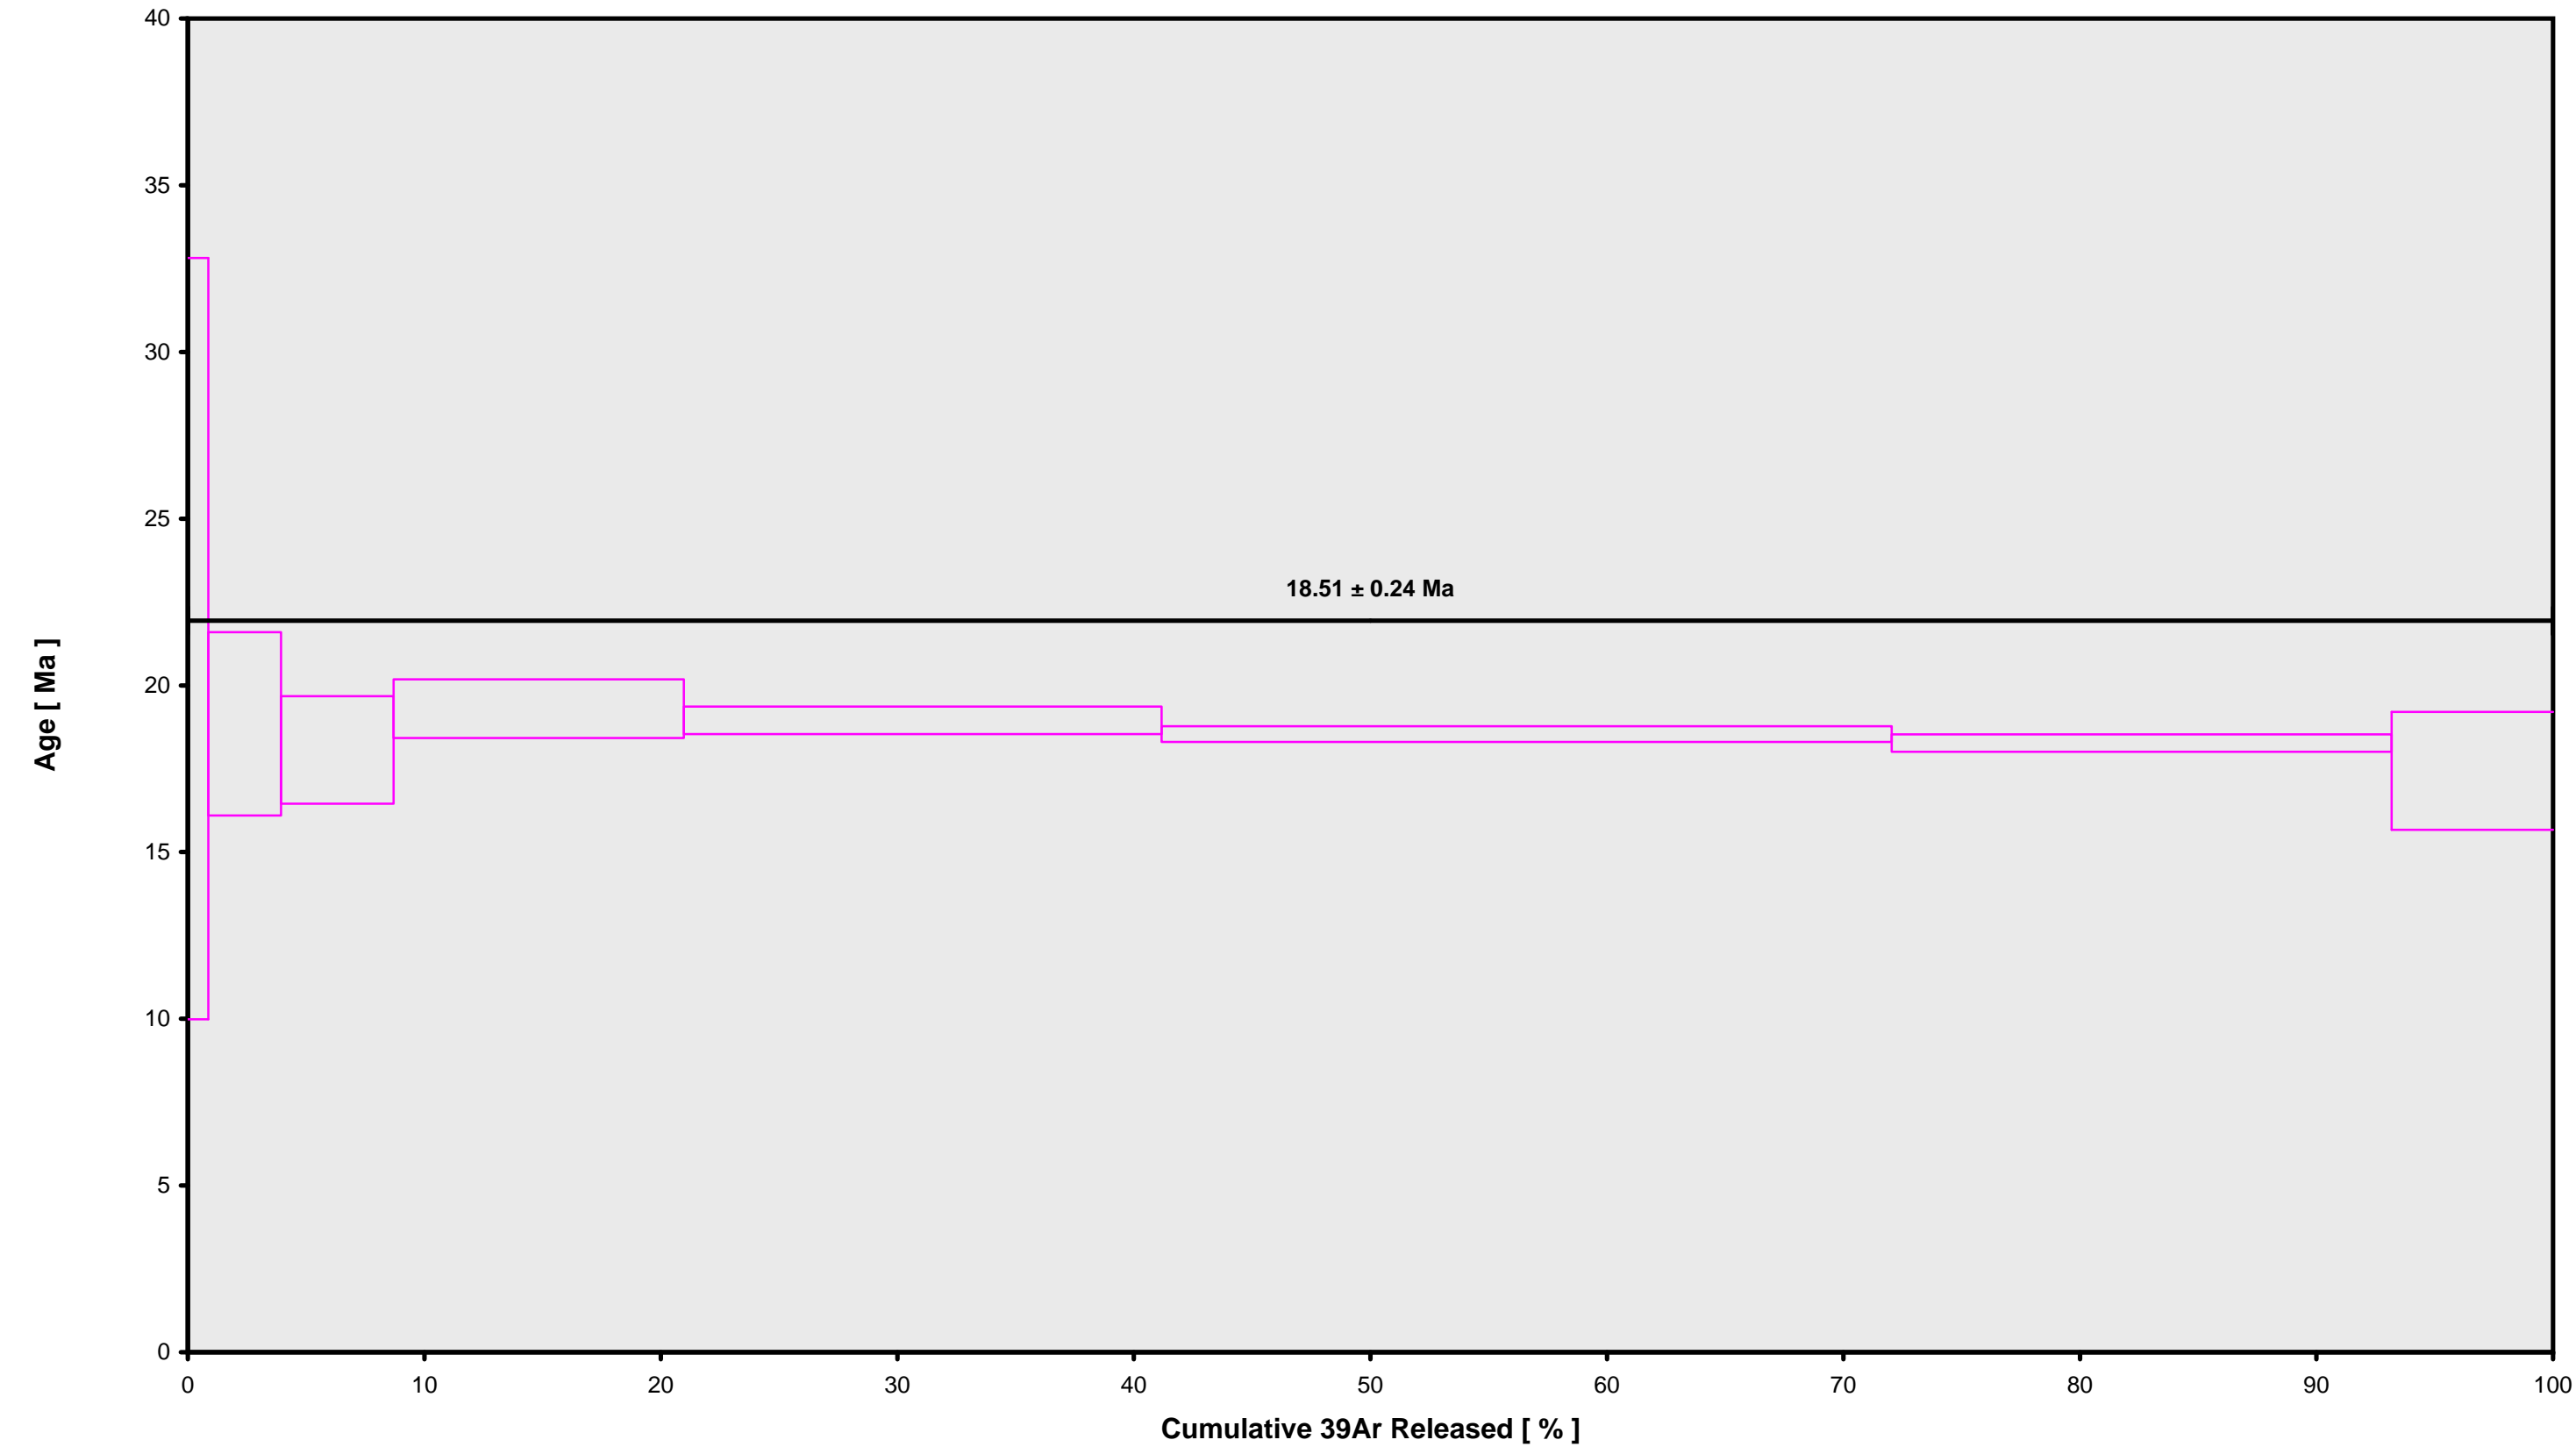

Ar-Ages in Ma

WEIGHTED PLATEAU

$18.51 \pm 0.24$

TOTAL FUSION

$18.59 \pm 0.27$

NORMAL ISOCHRON

$18.38 \pm 0.32$

INVERSE ISOCHRON

$18.39 \pm 0.32$

MSWD (PROBABILITY)

1.93 (6%)

Sample Info

Groundmass

Kerguelen Plateau

Trevor Smith

IRR = OSU2C13

J =  $0.00160172 \pm 0.00000405$

RECALIBRATED AGE



13C2047.AGE >>> 177-3 >>> KERGUELEN PROJECT

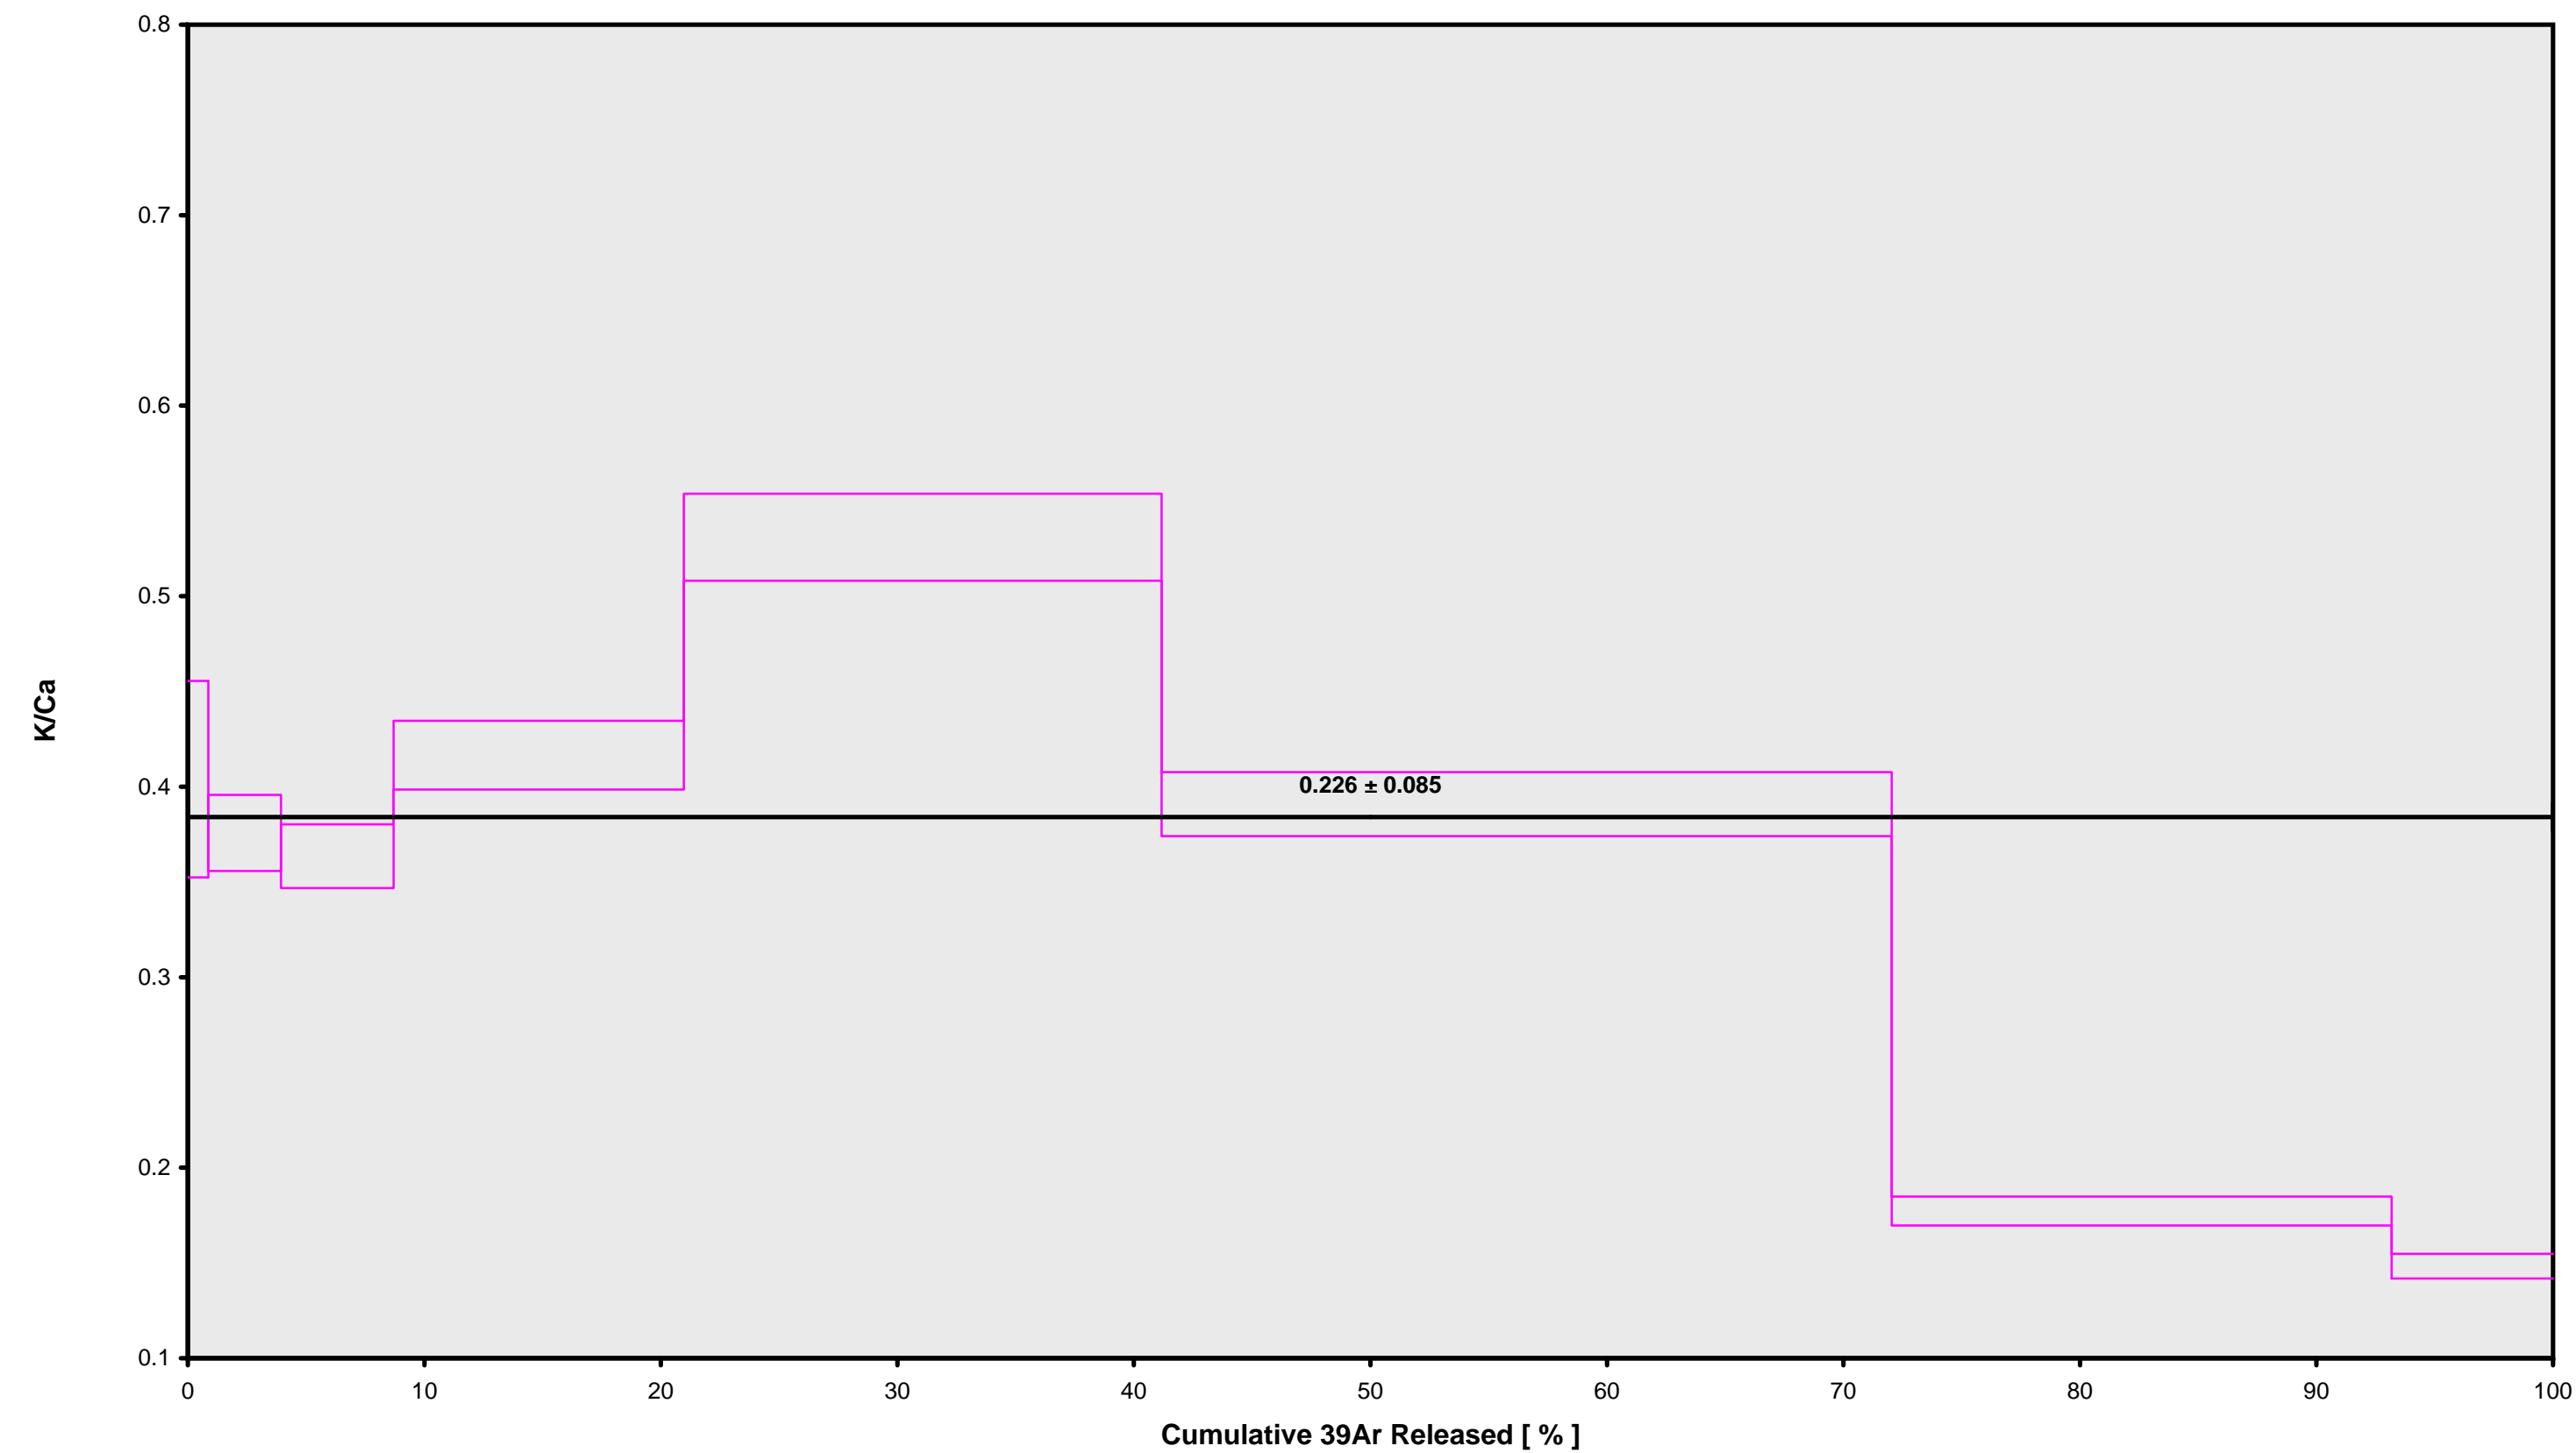

**Ar-Ages in Ma**

**WEIGHTED PLATEAU**  
18.51 ± 0.24

**TOTAL FUSION**  
18.59 ± 0.27

**NORMAL ISOCHRON**  
18.38 ± 0.32

**INVERSE ISOCHRON**  
18.39 ± 0.32

**Sample Info**

Groundmass  
Kerguelen Plateau  
Trevor Smith

IRR = OSU2C13  
J = 0.00160172 ± 0.00000405

**RECALIBRATED AGE**



13C2047.AGE >>> 177-3 >>> KERGUELEN PROJECT

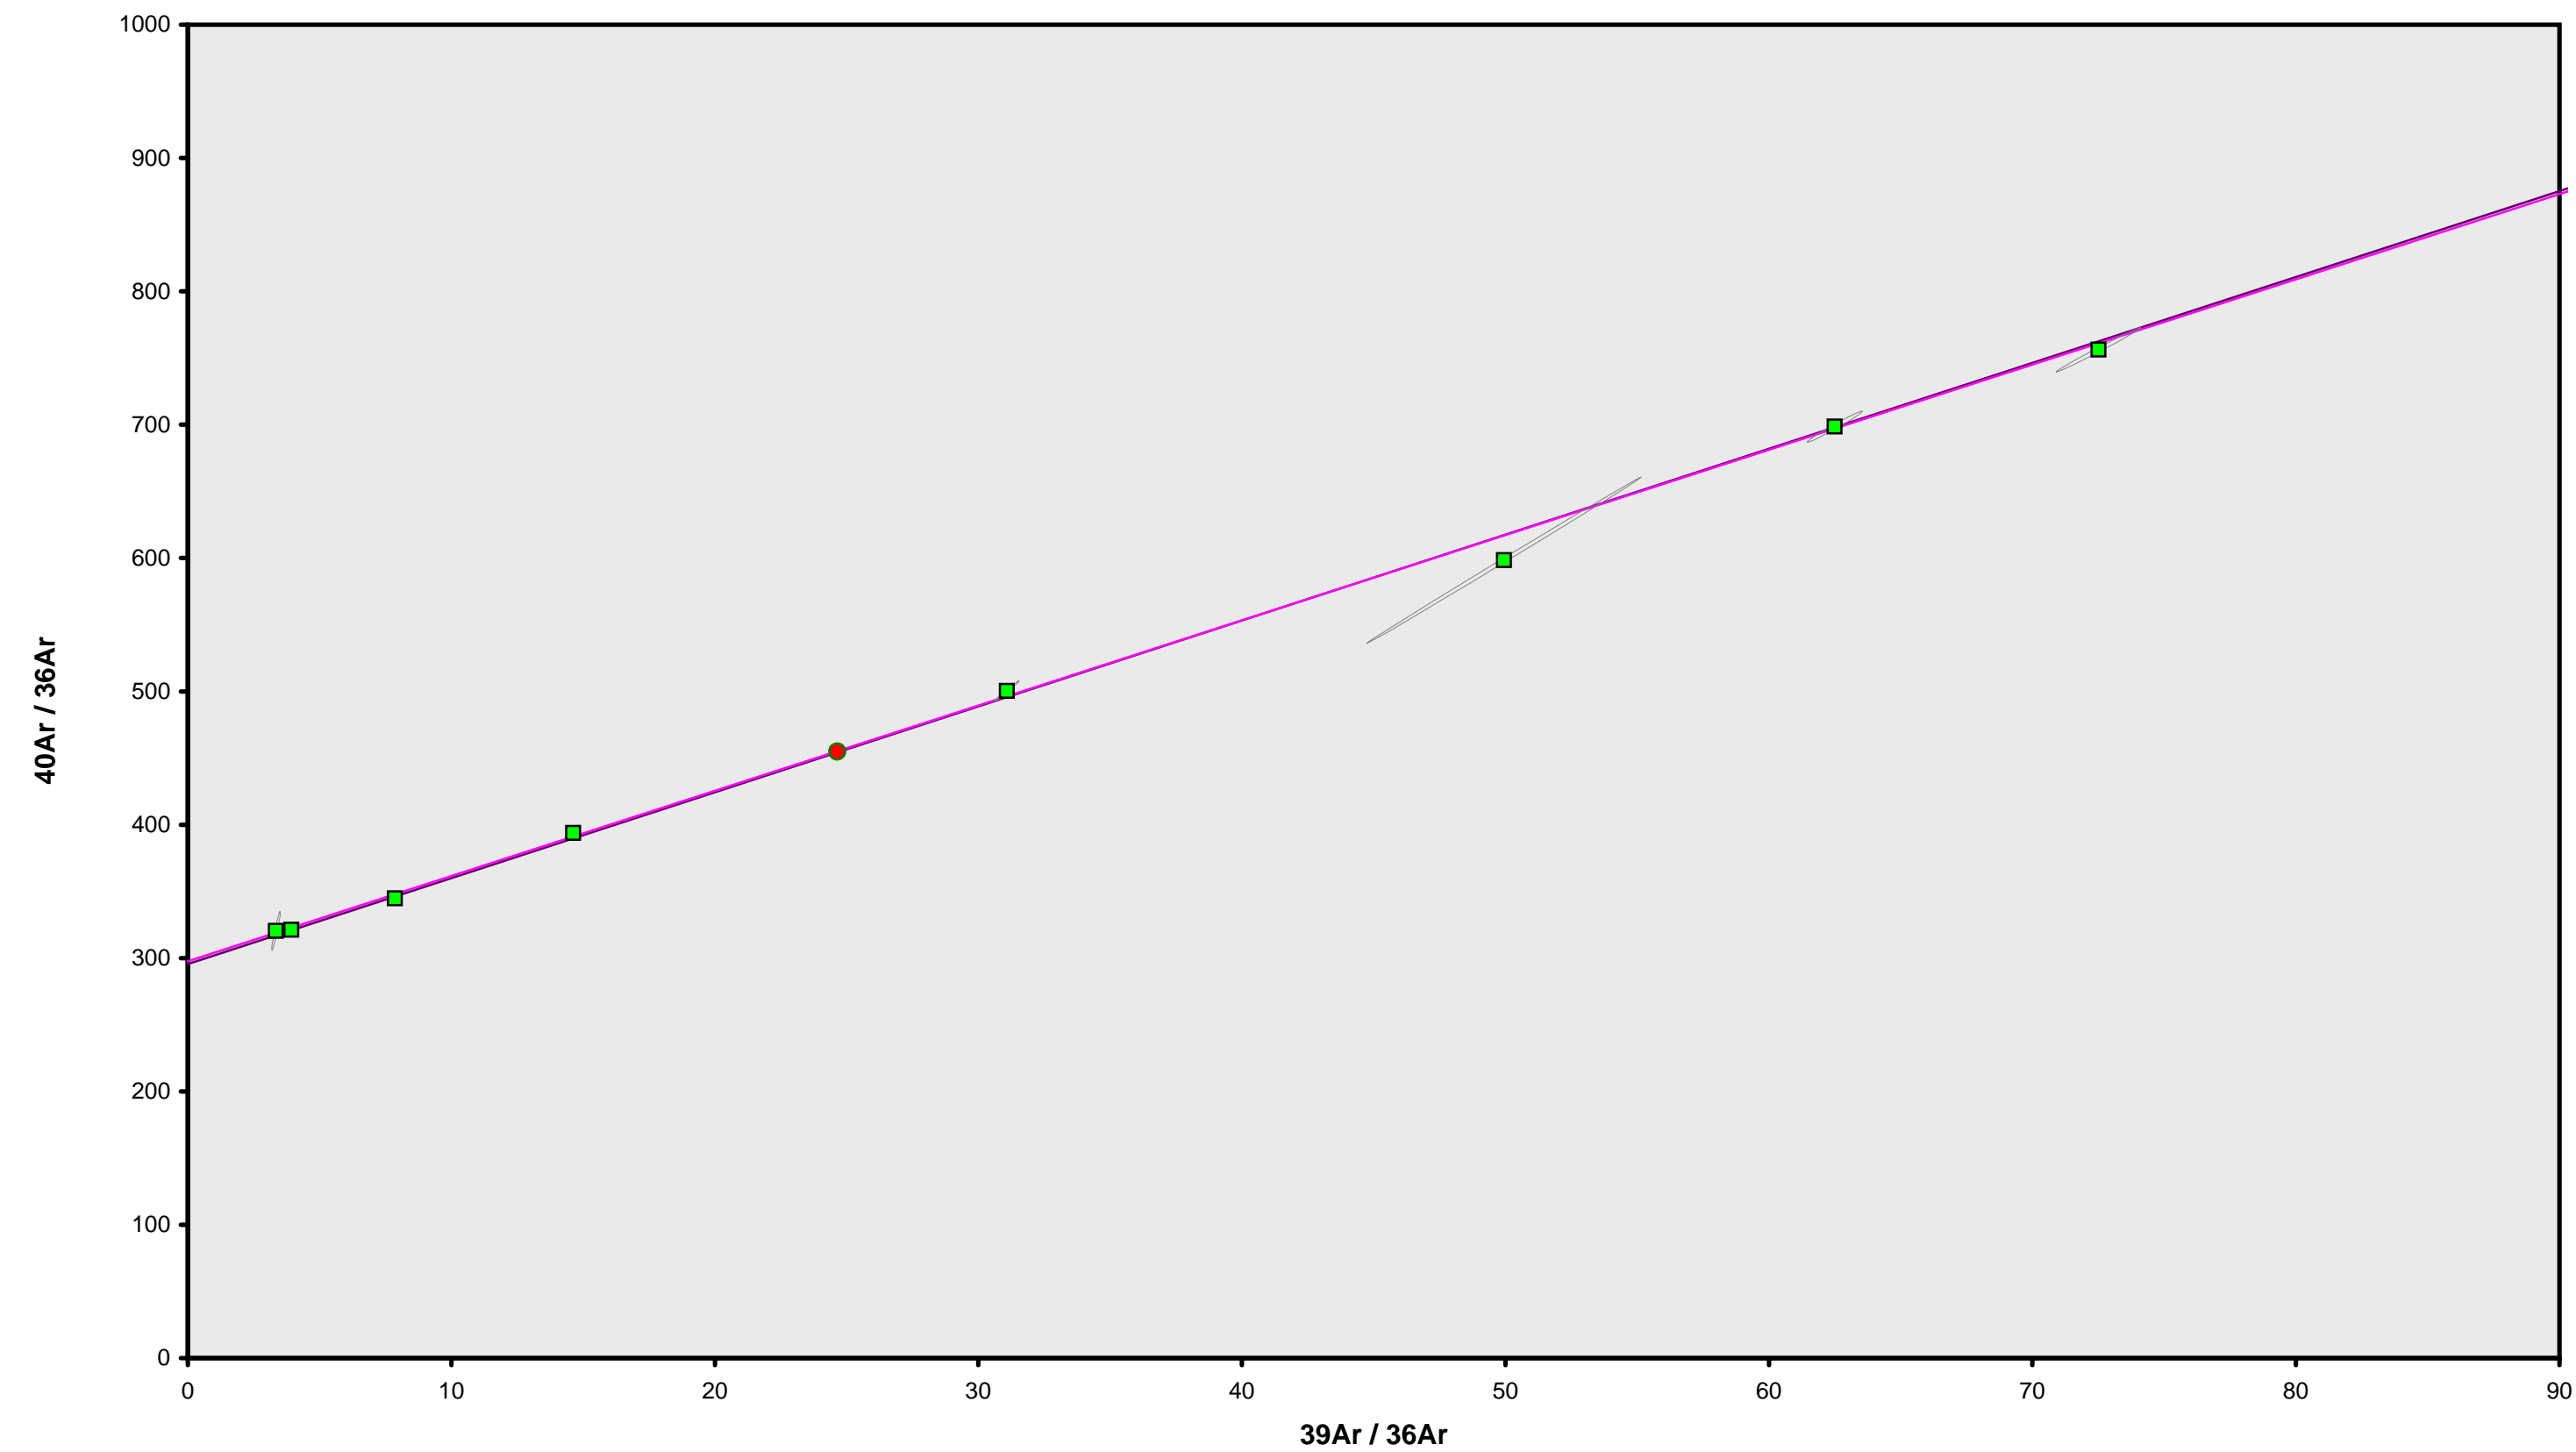

**Ar-Ages in Ma**

**WEIGHTED PLATEAU**  
18.51 ± 0.24

**TOTAL FUSION**  
18.59 ± 0.27

**NORMAL ISOCHRON**  
18.38 ± 0.32

**INVERSE ISOCHRON**  
18.39 ± 0.32

**MSWD (PROBABILITY)**  
1.87 (8%)

**40AR/36AR INTERCEPT**  
297.6 ± 3.7

**Sample Info**

Groundmass  
Kerguelen Plateau  
Trevor Smith

IRR = OSU2C13  
J = 0.00160172 ± 0.00000405

RECALIBRATED AGE



13C2047.AGE >>> 177-3 >>> KERGUELEN PROJECT

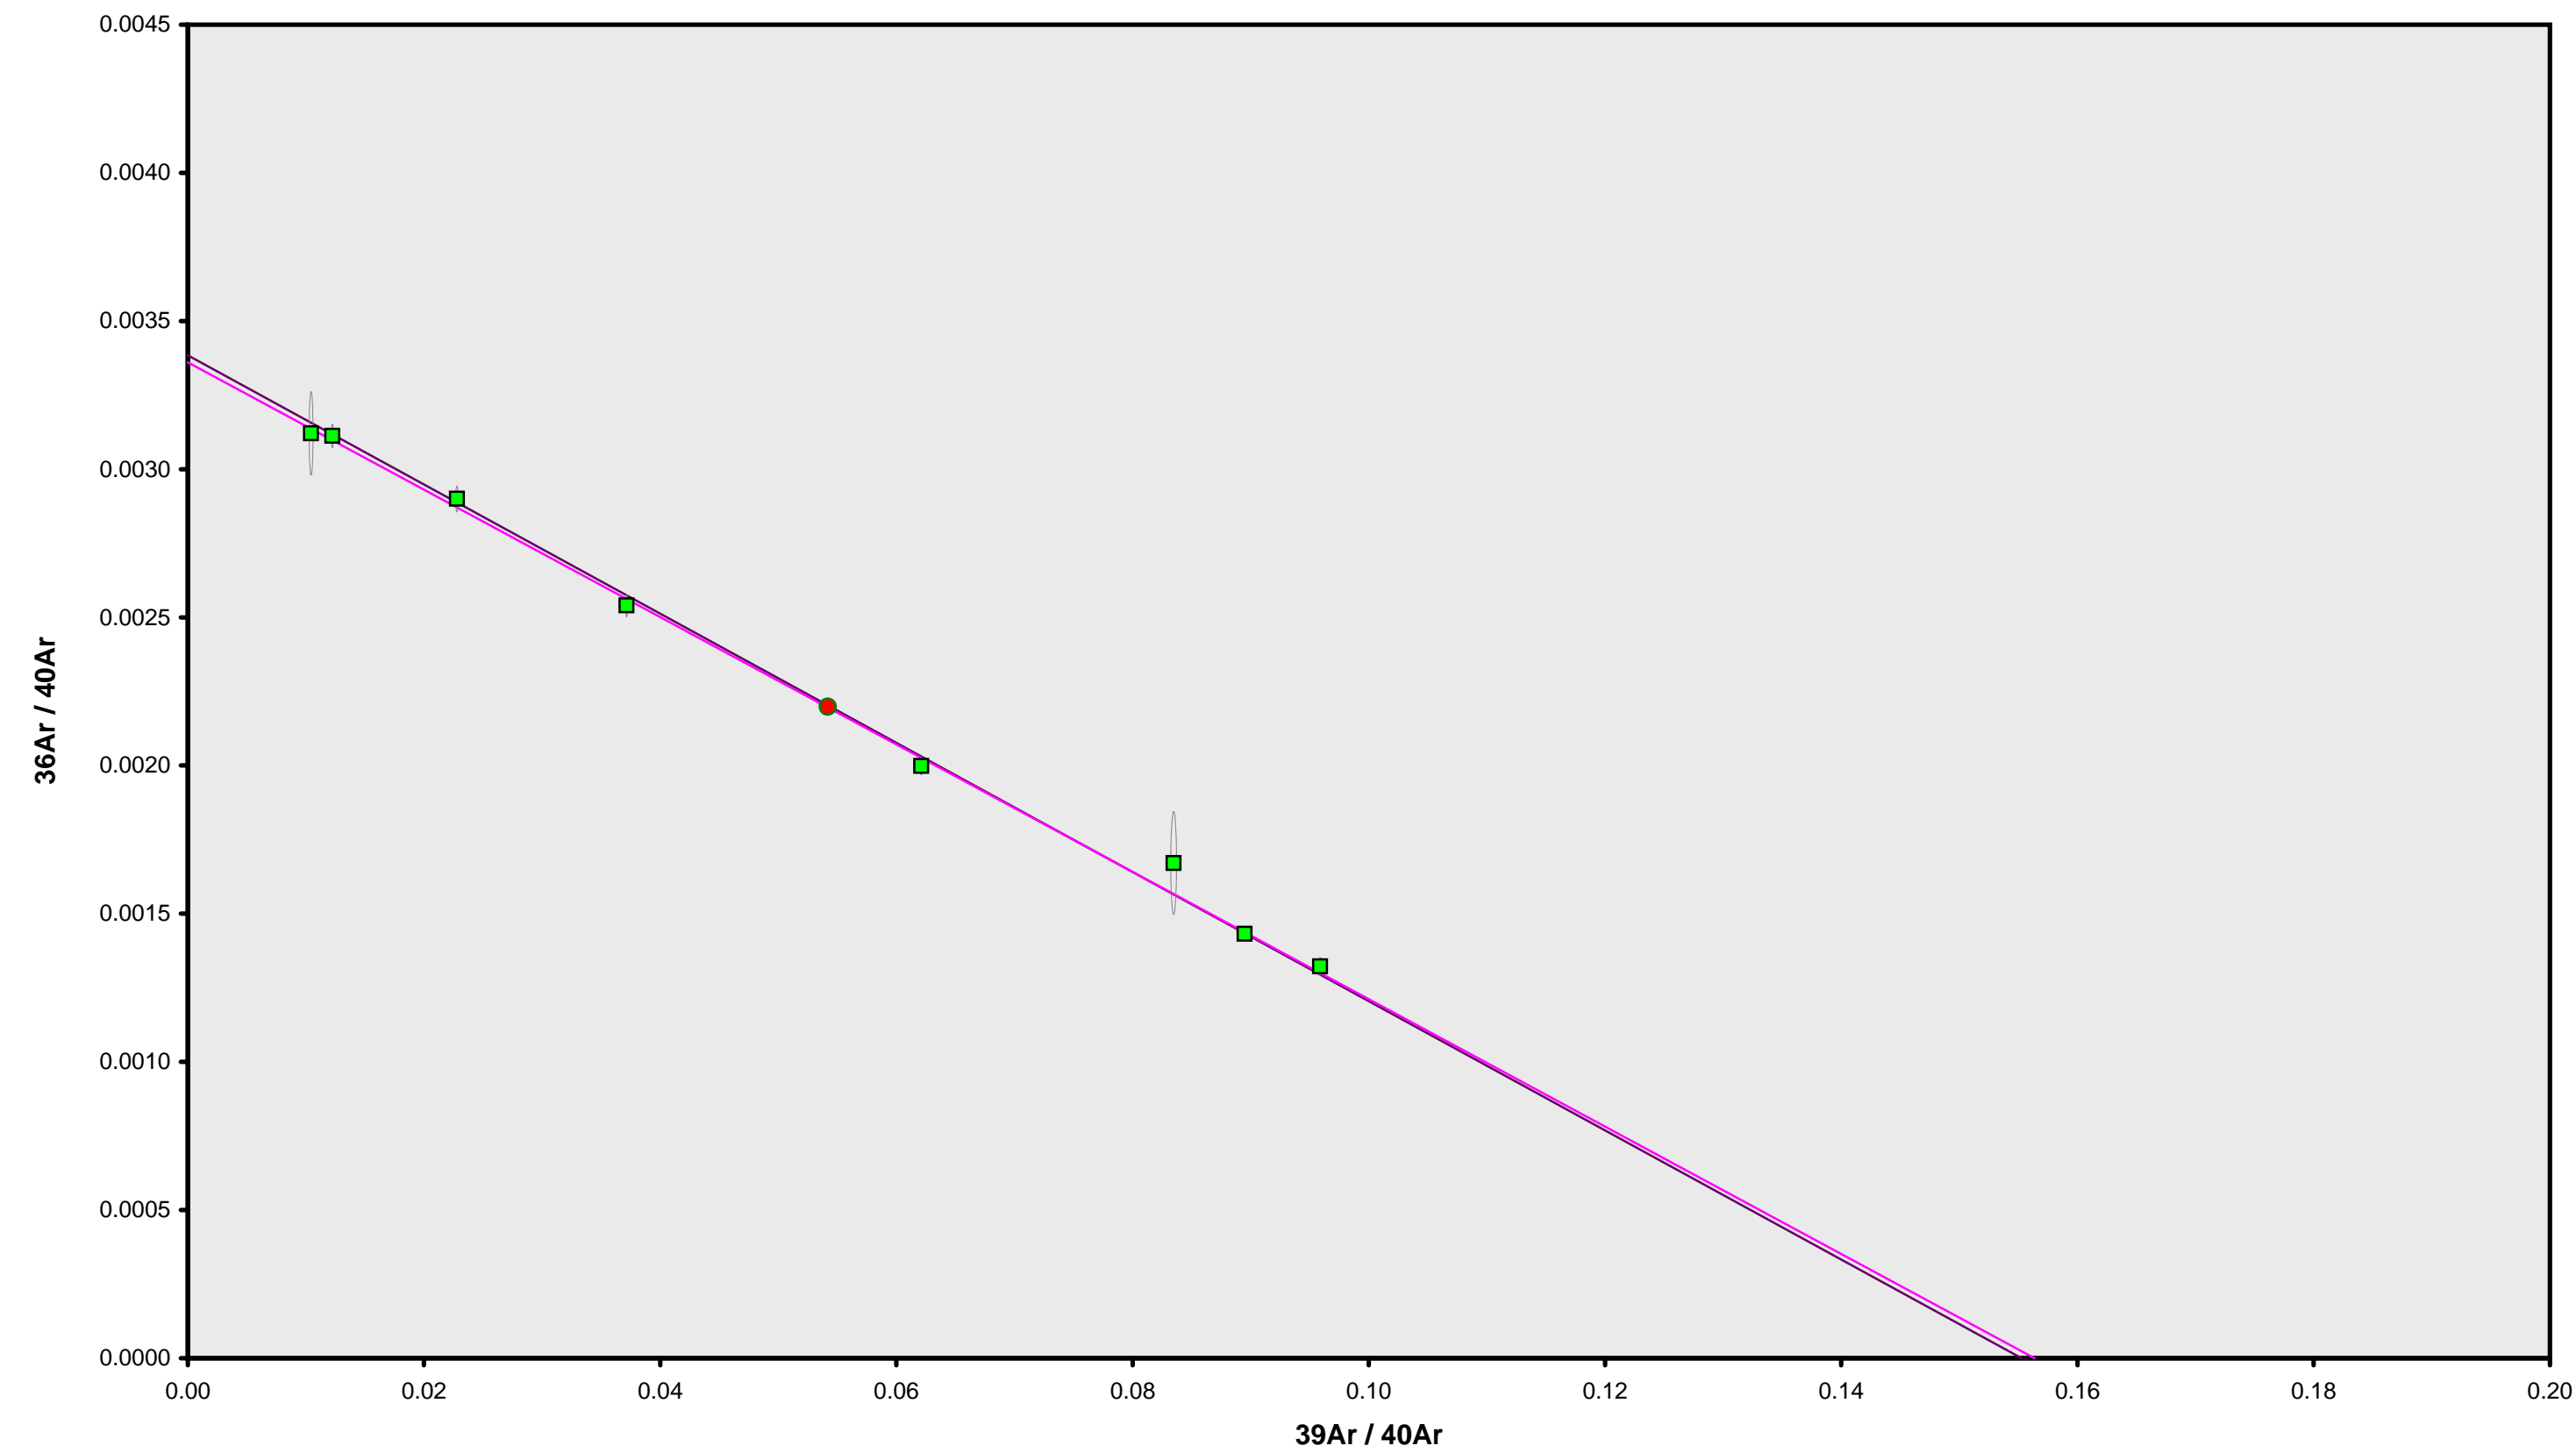

**Ar-Ages in Ma**

**WEIGHTED PLATEAU**  
18.51 ± 0.24

**TOTAL FUSION**  
18.59 ± 0.27

**NORMAL ISOCHRON**  
18.38 ± 0.32

**INVERSE ISOCHRON**  
18.39 ± 0.32

**MSWD (PROBABILITY)**  
1.84 (9%)

**SPREADING FACTOR**  
54.6%

**40AR/36AR INTERCEPT**  
297.6 ± 3.7

**Sample Info**

Groundmass  
Kerguelen Plateau  
Trevor Smith

IRR = OSU2C13  
J = 0.00160172 ± 0.00000405

**RECALIBRATED AGE**



| Incremental Heating |         |   | 36Ar(a)<br>[V] | 37Ar(ca)<br>[V] | 38Ar(cl)<br>[V] | 39Ar(k)<br>[V] | 40Ar(r)<br>[V] | Age ± 2σ<br>(Ma) | 40Ar(r)<br>(%) | 39Ar(k)<br>(%) | K/Ca ± 2σ     |
|---------------------|---------|---|----------------|-----------------|-----------------|----------------|----------------|------------------|----------------|----------------|---------------|
| 13C2034             | 500 °C  | ✓ | 0.0005677      | 0.0023003       | 0.0000164       | 0.0018868      | 0.0181657      | 28.00 ± 19.71    | 9.77           | 0.31           | 0.353 ± 0.120 |
| 13C2036             | 600 °C  | ✓ | 0.0026117      | 0.0108237       | 0.0001430       | 0.0134749      | 0.0936339      | 20.25 ± 2.90     | 10.82          | 2.23           | 0.535 ± 0.044 |
| 13C2037             | 700 °C  | ✓ | 0.0037886      | 0.0230247       | 0.0001871       | 0.0426712      | 0.2508751      | 17.15 ± 1.05     | 18.31          | 7.06           | 0.797 ± 0.043 |
| 13C2039             | 800 °C  | ✓ | 0.0066937      | 0.0699968       | 0.0002907       | 0.1393815      | 0.8199830      | 17.16 ± 0.46     | 29.30          | 23.05          | 0.856 ± 0.038 |
| 13C2040             | 900 °C  | ✓ | 0.0038458      | 0.0659962       | 0.0001437       | 0.1328882      | 0.7826154      | 17.18 ± 0.32     | 40.78          | 21.97          | 0.866 ± 0.038 |
| 13C2042             | 1050 °C | ✓ | 0.0020091      | 0.0850496       | 0.0001896       | 0.1257864      | 0.7493052      | 17.38 ± 0.29     | 55.79          | 20.80          | 0.636 ± 0.028 |
| 13C2043             | 1250 °C | ✓ | 0.0008508      | 0.2043967       | 0.0001837       | 0.1052569      | 0.6106268      | 16.93 ± 0.39     | 70.83          | 17.40          | 0.221 ± 0.010 |
| 13C2045             | 1400 °C | ✓ | 0.0003198      | 0.1113390       | 0.0000570       | 0.0434556      | 0.2501011      | 16.79 ± 0.88     | 72.57          | 7.19           | 0.168 ± 0.007 |
| Σ                   |         |   | 0.0206873      | 0.5729270       | 0.0012112       | 0.6048017      | 3.5753063      |                  |                |                |               |

| Information on Analysis                                                                                                                                                                                                                      | Results          | 40(r)/39(k) ± 2σ  | Age ± 2σ<br>(Ma)           | MSWD   | 39Ar(k)<br>(%,n)    | K/Ca ± 2σ     |
|----------------------------------------------------------------------------------------------------------------------------------------------------------------------------------------------------------------------------------------------|------------------|-------------------|----------------------------|--------|---------------------|---------------|
| Sample = 189-1<br>Material = Groundmass<br>Location = Kerguelen Plateau<br>Analyst = Kyle Krawl<br>Project = KERGUELEN<br>Mass Discrimination Law = LIN<br>Irradiation = OSU2C13<br>J = 0.00162479 ± 0.00000405<br>FCT-3 = 28.201 ± 0.023 Ma | Age Plateau      | 5.89344 ± 0.06953 | 17.19 ± 0.22               | 1.43   | 100.00              | 0.249 ± 0.134 |
|                                                                                                                                                                                                                                              | Recalibrated     | ± 1.18%           | ± 1.27%                    | 19%    | 8                   |               |
|                                                                                                                                                                                                                                              |                  |                   | Full External Error ± 0.45 | 2.07   | 2σ Confidence Limit |               |
|                                                                                                                                                                                                                                              |                  |                   | Analytical Error ± 0.20    | 1.1946 | Error Magnification |               |
|                                                                                                                                                                                                                                              | Total Fusion Age | 5.91154 ± 0.07052 | 17.25 ± 0.22               |        | 8                   | 0.454 ± 0.009 |
|                                                                                                                                                                                                                                              | Recalibrated     | ± 1.19%           | ± 1.29%                    |        |                     |               |
|                                                                                                                                                                                                                                              |                  |                   | Full External Error ± 0.45 |        |                     |               |
|                                                                                                                                                                                                                                              |                  |                   | Analytical Error ± 0.20    |        |                     |               |



| Normal Isochron |         |   | 39(k)/36(a) ± 2σ | 40(a+r)/36(a) ± 2σ | r.i.   |
|-----------------|---------|---|------------------|--------------------|--------|
| 13C2034         | 500 °C  | ✓ | 3.32 ± 0.38      | 327.50 ± 24.93     | 0.6517 |
| 13C2036         | 600 °C  | ✓ | 5.16 ± 0.11      | 331.35 ± 5.73      | 0.7793 |
| 13C2037         | 700 °C  | ✓ | 11.26 ± 0.16     | 361.72 ± 4.93      | 0.9338 |
| 13C2039         | 800 °C  | ✓ | 20.82 ± 0.23     | 418.00 ± 4.61      | 0.9806 |
| 13C2040         | 900 °C  | ✓ | 34.55 ± 0.45     | 499.00 ± 6.32      | 0.9651 |
| 13C2042         | 1050 °C | ✓ | 62.61 ± 1.28     | 668.45 ± 13.67     | 0.9852 |
| 13C2043         | 1250 °C | ✓ | 123.72 ± 6.87    | 1013.22 ± 56.14    | 0.9977 |
| 13C2045         | 1400 °C | ✓ | 135.89 ± 18.77   | 1077.61 ± 148.77   | 0.9987 |

| Results                                               | 40(a)/36(a) ± 2σ                                                    | 40(r)/39(k) ± 2σ             | Age ± 2σ (Ma)                                          | MSWD                                    |
|-------------------------------------------------------|---------------------------------------------------------------------|------------------------------|--------------------------------------------------------|-----------------------------------------|
| Normal Isochron<br>Recalibrated                       | 297.71 ± 3.43<br>± 1.15%                                            | 5.83626 ± 0.10721<br>± 1.84% | 17.03 ± 0.32<br>± 1.89%                                | 1.29<br>26%                             |
| Full External Error ± 0.50<br>Analytical Error ± 0.31 |                                                                     |                              |                                                        |                                         |
| Statistics                                            | 2σ Confidence Limit<br>Error Magnification<br>Number of Data Points | 2.15<br>1.1373<br>8          | Convergence<br>Number of Iterations<br>Calculated Line | 0.000000052907<br>60<br>Weighted York-2 |



| Inverse Isochron |         |   | 39(k)/40(a+r) ± 2σ    | 36(a)/40(a+r) ± 2σ      | r.i.   |
|------------------|---------|---|-----------------------|-------------------------|--------|
| 13C2034          | 500 °C  | ✓ | 0.0101477 ± 0.0008887 | 0.00305347 ± 0.00023247 | 0.0101 |
| 13C2036          | 600 °C  | ✓ | 0.0155709 ± 0.0002069 | 0.00301794 ± 0.00005221 | 0.0603 |
| 13C2037          | 700 °C  | ✓ | 0.0311378 ± 0.0001571 | 0.00276458 ± 0.00003766 | 0.1051 |
| 13C2039          | 800 °C  | ✓ | 0.0498150 ± 0.0001093 | 0.00239234 ± 0.00002640 | 0.0310 |
| 13C2040          | 900 °C  | ✓ | 0.0692466 ± 0.0002344 | 0.00200402 ± 0.00002540 | 0.0688 |
| 13C2042          | 1050 °C | ✓ | 0.0936605 ± 0.0003301 | 0.00149600 ± 0.00003059 | 0.0693 |
| 13C2043          | 1250 °C | ✓ | 0.1221030 ± 0.0004621 | 0.00098695 ± 0.00005468 | 0.0121 |
| 13C2045          | 1400 °C | ✓ | 0.1261062 ± 0.0008771 | 0.00092798 ± 0.00012811 | 0.0154 |

| Results                                               | 40(a)/36(a) ± 2σ         | 40(r)/39(k) ± 2σ             | Age ± 2σ (Ma)           | MSWD            |
|-------------------------------------------------------|--------------------------|------------------------------|-------------------------|-----------------|
| Inverse Isochron<br>Recalibrated                      | 297.70 ± 3.46<br>± 1.16% | 5.83945 ± 0.10825<br>± 1.85% | 17.04 ± 0.33<br>± 1.91% | 1.31<br>25%     |
| Full External Error ± 0.50<br>Analytical Error ± 0.31 |                          |                              |                         |                 |
|                                                       |                          |                              |                         |                 |
| Statistics                                            | 2σ Confidence Limit      | 2.15                         | Convergence             | 0.0000000050    |
|                                                       | Error Magnification      | 1.1450                       | Number of Iterations    | 5               |
|                                                       | Number of Data Points    | 8                            | Calculated Line         | Weighted York-2 |
|                                                       | Spreading Factor         | 67.7%                        |                         |                 |



| OSU Argon Geochronology Lab |         |   |           |           |           |           |           |           |           |           |           |           |                   |               |             |             |               |
|-----------------------------|---------|---|-----------|-----------|-----------|-----------|-----------|-----------|-----------|-----------|-----------|-----------|-------------------|---------------|-------------|-------------|---------------|
| Relative Abundances         |         |   | 40Ar      |           | 39Ar      |           | 38Ar      |           | 37Ar      |           | 36Ar      |           | 40(r)/39(k) ± 2σ  | Age ± 2σ (Ma) | 40Ar(r) (%) | 39Ar(k) (%) | K/Ca ± 2σ     |
|                             |         |   | [V]       | 1σ        |                   |               |             |             |               |
| 13C2034                     | 500 °C  | ✓ | 0.1859364 | 0.0007641 | 0.0018884 | 0.0000823 | 0.0001443 | 0.0000288 | 0.0023003 | 0.0003781 | 0.0005684 | 0.0000215 | 9.62772 ± 6.83033 | 28.00 ± 19.71 | 9.77        | 0.31        | 0.353 ± 0.120 |
| 13C2036                     | 600 °C  | ✓ | 0.8654052 | 0.0016109 | 0.0134822 | 0.0000860 | 0.0007859 | 0.0000305 | 0.0108237 | 0.0004371 | 0.0026146 | 0.0000221 | 6.94877 ± 1.00068 | 20.25 ± 2.90  | 10.82       | 2.23        | 0.535 ± 0.044 |
| 13C2037                     | 700 °C  | ✓ | 1.3704444 | 0.0018417 | 0.0426867 | 0.0000911 | 0.0013840 | 0.0000171 | 0.0230247 | 0.0006161 | 0.0037947 | 0.0000253 | 5.87925 ± 0.36173 | 17.15 ± 1.05  | 18.31       | 7.06        | 0.797 ± 0.043 |
| 13C2039                     | 800 °C  | ✓ | 2.7981236 | 0.0012110 | 0.1394286 | 0.0001404 | 0.0031377 | 0.0000213 | 0.0699968 | 0.0015313 | 0.0067123 | 0.0000368 | 5.88301 ± 0.15756 | 17.16 ± 0.46  | 29.30       | 23.05       | 0.856 ± 0.038 |
| 13C2040                     | 900 °C  | ✓ | 1.9191930 | 0.0016482 | 0.1329327 | 0.0001938 | 0.0023840 | 0.0000202 | 0.0659962 | 0.0014486 | 0.0038633 | 0.0000241 | 5.88928 ± 0.11153 | 17.18 ± 0.32  | 40.78       | 21.97       | 0.866 ± 0.038 |
| 13C2042                     | 1050 °C | ✓ | 1.3431318 | 0.0015012 | 0.1258437 | 0.0001714 | 0.0020084 | 0.0000187 | 0.0850496 | 0.0018479 | 0.0020316 | 0.0000204 | 5.95696 ± 0.10019 | 17.38 ± 0.29  | 55.79       | 20.80       | 0.636 ± 0.028 |
| 13C2043                     | 1250 °C | ✓ | 0.8621404 | 0.0006870 | 0.1053945 | 0.0001806 | 0.0015689 | 0.0000265 | 0.2043967 | 0.0043987 | 0.0009048 | 0.0000235 | 5.80130 ± 0.13441 | 16.93 ± 0.39  | 70.83       | 17.40       | 0.221 ± 0.010 |
| 13C2045                     | 1400 °C | ✓ | 0.3446388 | 0.0006629 | 0.0435305 | 0.0001259 | 0.0006268 | 0.0000204 | 0.1113390 | 0.0024066 | 0.0003492 | 0.0000221 | 5.75533 ± 0.30348 | 16.79 ± 0.88  | 72.57       | 7.19        | 0.168 ± 0.007 |
| Σ                           |         |   | 9.6890137 | 0.0037308 | 0.6051872 | 0.0003970 | 0.0120399 | 0.0000662 | 0.5729270 | 0.0058061 | 0.0208388 | 0.0000706 |                   |               |             |             |               |

| Information on Analysis and Constants Used in Calculations |                                                                 |
|------------------------------------------------------------|-----------------------------------------------------------------|
| Sample = 189-1                                             | Age Equations = Min et al. (2000)                               |
| Material = Groundmass                                      | Negative Intensities = Allowed                                  |
| Location = Kerguelen Plateau                               | Decay Constant 40K = 5.543 ± 0.044 E-10 1/a                     |
| Analyst = Kyle Krawl                                       | Decay Constant 39Ar = 2.940 ± 0.029 E-07 1/h                    |
| Project = KERGUELEN                                        | Decay Constant 37Ar = 8.230 ± 0.082 E-04 1/h                    |
| Mass Discrimination Law = LIN                              | Decay Constant 36Cl = 2.236 ± 0.045 E-06 1/a                    |
| Irradiation = OSU2C13                                      | Decay Constant 40K(EC,β <sup>+</sup> ) = 0.580 ± 0.009 E-10 1/a |
| J = 0.00162479 ± 0.00000405                                | Decay Constant 40K(β <sup>-</sup> ) = 4.950 ± 0.043 E-10 1/a    |
| FCT-3 = 28.201 ± 0.023 Ma                                  | Atmospheric Ratio 40/36(a) = 295.50                             |
| IGSN = Undefined                                           | Atmospheric Ratio 38/36(a) = 0.1869                             |
| Preferred Age = Undefined                                  | Production Ratio 39/37(ca) = 0.000673                           |
| Classification = Undefined                                 | Production Ratio 38/37(ca) = 0.000139                           |
| Experiment Type = Undefined                                | Production Ratio 36/37(ca) = 0.000264                           |
| Extraction Method = Undefined                              | Production Ratio 40/39(k) = 0.001010                            |
| Heating = 0 sec                                            | Production Ratio 38/39(k) = 0.011380                            |
| Isolation = 15.00 min                                      | Production Ratio 36/38(cl) = 316.00 ± 15.80                     |
| Instrument = MAP215-50                                     | Scaling Ratio K/Ca = 0.430                                      |
| Lithology = Undefined                                      | Abundance Ratio 40K/K = 1.1700 ± 0.0199 E-04                    |
| Lat-Lon = Undefined - Undefined                            | Atomic Weight K = 39.0983 ± 0.0001 g                            |
| R1 ratio = Undefined                                       | Recalibrated to FCT-3 Secondary Standard                        |
| R2 ratio = Undefined                                       | Standard Age = 28.201 ± 0.023 Ma                                |
| R3 ratio = Undefined                                       |                                                                 |
| R4 ratio = Undefined                                       |                                                                 |
| R5 ratio = Undefined                                       |                                                                 |
| Collector Calibrations =                                   |                                                                 |

| Results                          | 40(a)/36(a) ± 2σ      | 40(r)/39(k) ± 2σ          | Age ± 2σ (Ma)              | MSWD         | 39Ar(k) (%.n)        | K/Ca ± 2σ     |
|----------------------------------|-----------------------|---------------------------|----------------------------|--------------|----------------------|---------------|
| Age Plateau<br>Recalibrated      |                       | 5.89344 ± 0.06953 ± 1.18% | 17.19 ± 0.22 ± 1.27%       | 1.43 19%     | 100.00 8             | 0.249 ± 0.134 |
|                                  |                       |                           | Full External Error ± 0.45 | 2.07         | 2σ Confidence Limit  |               |
|                                  |                       |                           | Analytical Error ± 0.20    | 1.1946       | Error Magnification  |               |
| Total Fusion Age<br>Recalibrated |                       | 5.91154 ± 0.07052 ± 1.19% | 17.25 ± 0.22 ± 1.29%       |              | 8                    | 0.454 ± 0.009 |
|                                  |                       |                           | Full External Error ± 0.45 |              |                      |               |
|                                  |                       |                           | Analytical Error ± 0.20    |              |                      |               |
| Normal Isochron<br>Recalibrated  | 297.71 ± 3.43 ± 1.15% | 5.83626 ± 0.10721 ± 1.84% | 17.03 ± 0.32 ± 1.89%       | 1.29 26%     | 100.00 8             |               |
|                                  |                       |                           | Full External Error ± 0.50 | 2.15         | 2σ Confidence Limit  |               |
|                                  |                       |                           | Analytical Error ± 0.31    | 1.1373       | Error Magnification  |               |
|                                  |                       |                           |                            | 60           | Number of Iterations |               |
|                                  |                       |                           |                            | 0.0000000529 | Convergence          |               |
| Inverse Isochron<br>Recalibrated | 297.70 ± 3.46 ± 1.16% | 5.83945 ± 0.10825 ± 1.85% | 17.04 ± 0.33 ± 1.91%       | 1.31 25%     | 100.00 8             |               |
|                                  |                       |                           | Full External Error ± 0.50 | 2.15         | 2σ Confidence Limit  |               |
|                                  |                       |                           | Analytical Error ± 0.31    | 1.1450       | Error Magnification  |               |
|                                  |                       |                           |                            | 5            | Number of Iterations |               |
|                                  |                       |                           |                            | 0.0000000050 | Convergence          |               |
|                                  |                       |                           |                            | 68%          | Spreading Factor     |               |



| OSU Argon Geochronology Lab |         |         |                |           |                |           |                 |           |                 |           |                 |           |                |           |                |           |                |           |                 |           |                 |           |                |           |                 |           |                |           |                |           |                |           |                |           |      |
|-----------------------------|---------|---------|----------------|-----------|----------------|-----------|-----------------|-----------|-----------------|-----------|-----------------|-----------|----------------|-----------|----------------|-----------|----------------|-----------|-----------------|-----------|-----------------|-----------|----------------|-----------|-----------------|-----------|----------------|-----------|----------------|-----------|----------------|-----------|----------------|-----------|------|
| Degassing<br>Patterns       |         |         | 36Ar(a)<br>[V] | %1σ       | 36Ar(c)<br>[V] | %1σ       | 36Ar(ca)<br>[V] | %1σ       | 36Ar(cl)<br>[V] | %1σ       | 37Ar(ca)<br>[V] | %1σ       | 38Ar(a)<br>[V] | %1σ       | 38Ar(c)<br>[V] | %1σ       | 38Ar(k)<br>[V] | %1σ       | 38Ar(ca)<br>[V] | %1σ       | 38Ar(cl)<br>[V] | %1σ       | 39Ar(k)<br>[V] | %1σ       | 39Ar(ca)<br>[V] | %1σ       | 40Ar(r)<br>[V] | %1σ       | 40Ar(a)<br>[V] | %1σ       | 40Ar(c)<br>[V] | %1σ       | 40Ar(k)<br>[V] | %1σ       |      |
|                             | 13C2034 | 500 °C  | ✓              | 0.0005677 | 3.78           | 0.0000000 | 0.00            | 0.0000006 | 16.44           | 0.0000000 | 177.00          | 0.0023003 | 16.44          | 0.0001061 | 3.78           | 0.0000000 | 0.00           | 0.0000215 | 4.36            | 0.0000003 | 16.44           | 0.0000164 | 177.08         | 0.0018868 | 4.36            | 0.0000015 | 16.44          | 0.0181657 | 35.20          | 0.1677689 | 3.78           | 0.0000000 | 0.00           | 0.0000019 | 4.36 |
|                             | 13C2036 | 600 °C  | ✓              | 0.0026117 | 0.84           | 0.0000000 | 0.00            | 0.0000029 | 4.04            | 0.0000000 | 22.22           | 0.0108237 | 4.04           | 0.0004881 | 0.84           | 0.0000000 | 0.00           | 0.0001533 | 0.64            | 0.0000015 | 4.04            | 0.0001430 | 22.87          | 0.0134749 | 0.64            | 0.0000073 | 4.04           | 0.0936339 | 7.17           | 0.7717577 | 0.84           | 0.0000000 | 0.00           | 0.0000136 | 0.64 |
|                             | 13C2037 | 700 °C  | ✓              | 0.0037886 | 0.67           | 0.0000000 | 0.00            | 0.0000061 | 2.68            | 0.0000000 | 10.90           | 0.0230247 | 2.68           | 0.0007081 | 0.67           | 0.0000000 | 0.00           | 0.0004856 | 0.21            | 0.0000032 | 2.68            | 0.0001871 | 12.16          | 0.0426712 | 0.21            | 0.0000155 | 2.68           | 0.2508751 | 3.07           | 1.1195262 | 0.67           | 0.0000000 | 0.00           | 0.0000431 | 0.21 |
|                             | 13C2039 | 800 °C  | ✓              | 0.0066937 | 0.55           | 0.0000000 | 0.00            | 0.0000185 | 2.19            | 0.0000001 | 9.42            | 0.0699968 | 2.19           | 0.0012511 | 0.55           | 0.0000000 | 0.00           | 0.0015862 | 0.10            | 0.0000097 | 2.19            | 0.0002907 | 10.85          | 0.1393815 | 0.10            | 0.0000471 | 2.19           | 0.8199830 | 1.34           | 1.9779999 | 0.55           | 0.0000000 | 0.00           | 0.0001408 | 0.10 |
|                             | 13C2040 | 900 °C  | ✓              | 0.0038458 | 0.63           | 0.0000000 | 0.00            | 0.0000174 | 2.19            | 0.0000000 | 15.47           | 0.0659962 | 2.19           | 0.0007188 | 0.63           | 0.0000000 | 0.00           | 0.0015123 | 0.15            | 0.0000092 | 2.19            | 0.0001437 | 16.38          | 0.1328882 | 0.15            | 0.0000444 | 2.19           | 0.7826154 | 0.94           | 1.1364433 | 0.63           | 0.0000000 | 0.00           | 0.0001342 | 0.15 |
|                             | 13C2042 | 1050 °C | ✓              | 0.0020091 | 1.02           | 0.0000000 | 0.00            | 0.0000225 | 2.17            | 0.0000000 | 11.44           | 0.0850496 | 2.17           | 0.0003755 | 1.02           | 0.0000000 | 0.00           | 0.0014314 | 0.14            | 0.0000118 | 2.17            | 0.0001896 | 12.65          | 0.1257864 | 0.14            | 0.0000572 | 2.17           | 0.7493052 | 0.83           | 0.5936995 | 1.02           | 0.0000000 | 0.00           | 0.0001270 | 0.14 |
|                             | 13C2043 | 1250 °C | ✓              | 0.0008508 | 2.77           | 0.0000000 | 0.00            | 0.0000540 | 2.15            | 0.0000000 | 15.61           | 0.2043967 | 2.15           | 0.0001590 | 2.77           | 0.0000000 | 0.00           | 0.0011978 | 0.17            | 0.0000284 | 2.15            | 0.0001837 | 16.51          | 0.1052569 | 0.17            | 0.0001376 | 2.15           | 0.6106268 | 1.15           | 0.2514073 | 2.77           | 0.0000000 | 0.00           | 0.0001063 | 0.17 |
|                             | 13C2045 | 1400 °C | ✓              | 0.0003198 | 6.90           | 0.0000000 | 0.00            | 0.0000294 | 2.16            | 0.0000000 | 36.99           | 0.1113390 | 2.16           | 0.0000598 | 6.90           | 0.0000000 | 0.00           | 0.0004945 | 0.29            | 0.0000155 | 2.16            | 0.0000570 | 37.38          | 0.0434556 | 0.29            | 0.0000749 | 2.16           | 0.2501011 | 2.62           | 0.0944939 | 6.90           | 0.0000000 | 0.00           | 0.0000439 | 0.29 |
|                             |         | Σ       |                | 0.0206873 | 0.34           | 0.0000000 | 0.00            | 0.0001513 | 1.01            | 0.0000003 | 5.98            | 0.5729270 | 1.01           | 0.0038665 | 0.34           | 0.0000000 | 0.00           | 0.0068826 | 0.07            | 0.0000796 | 1.01            | 0.0012112 | 6.36           | 0.6048017 | 0.07            | 0.0003856 | 1.01           | 3.5753063 | 0.59           | 6.1130966 | 0.34           | 0.0000000 | 0.00           | 0.0006108 | 0.07 |
|                             | Σ       |         |                |           |                |           |                 |           |                 | 0.0208388 | 0.34            | 0.5729270 | 1.01           |           |                |           |                |           |                 |           | 0.0120399       | 0.65      |                |           | 0.6051872       | 0.07      |                |           |                |           |                |           | 9.6890137      | 0.31      |      |



| Additional Parameters |         |   | 40Ar/39Ar | 1σ       | 37Ar/39Ar | 1σ       | 36Ar/39Ar | 1σ       | Time (days) | 37Ar (decay) | 39Ar (decay) | 40Ar (moles) |
|-----------------------|---------|---|-----------|----------|-----------|----------|-----------|----------|-------------|--------------|--------------|--------------|
| 13C2034               | 500 °C  | ✓ | 98.464616 | 4.308112 | 1.218162  | 0.207151 | 0.300979  | 0.017359 | 107.655     | 8.405336     | 1.00076078   | 3.719E-14    |
| 13C2036               | 600 °C  | ✓ | 64.188816 | 0.426326 | 0.802818  | 0.032819 | 0.193929  | 0.002051 | 107.690     | 8.4111103    | 1.00076103   | 1.731E-13    |
| 13C2037               | 700 °C  | ✓ | 32.104687 | 0.080945 | 0.539387  | 0.014480 | 0.088896  | 0.000622 | 107.707     | 8.413988     | 1.00076115   | 2.741E-13    |
| 13C2039               | 800 °C  | ✓ | 20.068506 | 0.022000 | 0.502026  | 0.010994 | 0.048141  | 0.000269 | 107.742     | 8.419876     | 1.00076140   | 5.596E-13    |
| 13C2040               | 900 °C  | ✓ | 14.437332 | 0.024430 | 0.496464  | 0.010921 | 0.029062  | 0.000186 | 107.760     | 8.422764     | 1.00076152   | 3.838E-13    |
| 13C2042               | 1050 °C | ✓ | 10.673017 | 0.018803 | 0.675835  | 0.014713 | 0.016144  | 0.000164 | 107.795     | 8.428658     | 1.00076177   | 2.686E-13    |
| 13C2043               | 1250 °C | ✓ | 8.180127  | 0.015461 | 1.939349  | 0.041867 | 0.008585  | 0.000224 | 107.813     | 8.431664     | 1.00076190   | 1.724E-13    |
| 13C2045               | 1400 °C | ✓ | 7.917179  | 0.027498 | 2.557724  | 0.055777 | 0.008022  | 0.000507 | 107.849     | 8.437681     | 1.00076216   | 6.893E-14    |



| Procedure |         | 36Ar      |           | 37Ar      |           | 38Ar      |           | 39Ar      |           | 40Ar      |           |
|-----------|---------|-----------|-----------|-----------|-----------|-----------|-----------|-----------|-----------|-----------|-----------|
|           |         | [V]       | 1σ        |
| 13C2034   | 500 °C  | 0.0003075 | 0.0000156 | 0.0000063 | 0.0000355 | 0.0000061 | 0.0000121 | 0.0000042 | 0.0000803 | 0.0009379 | 0.0006115 |
| 13C2036   | 600 °C  | 0.0003080 | 0.0000156 | 0.0000126 | 0.0000355 | 0.0000040 | 0.0000121 | 0.0000162 | 0.0000803 | 0.0014946 | 0.0006115 |
| 13C2037   | 700 °C  | 0.0003082 | 0.0000156 | 0.0000206 | 0.0000355 | 0.0000126 | 0.0000121 | 0.0000204 | 0.0000803 | 0.0017729 | 0.0006115 |
| 13C2039   | 800 °C  | 0.0003087 | 0.0000156 | 0.0000336 | 0.0000355 | 0.0000299 | 0.0000121 | 0.0000605 | 0.0000803 | 0.0023407 | 0.0006115 |
| 13C2040   | 900 °C  | 0.0003089 | 0.0000156 | 0.0000385 | 0.0000355 | 0.0000335 | 0.0000121 | 0.0001027 | 0.0000803 | 0.0026191 | 0.0006115 |
| 13C2042   | 1050 °C | 0.0003093 | 0.0000156 | 0.0000452 | 0.0000355 | 0.0000260 | 0.0000121 | 0.0002260 | 0.0000803 | 0.0031869 | 0.0006115 |
| 13C2043   | 1250 °C | 0.0003096 | 0.0000156 | 0.0000470 | 0.0000355 | 0.0000160 | 0.0000121 | 0.0002933 | 0.0000803 | 0.0034763 | 0.0006115 |
| 13C2045   | 1400 °C | 0.0003101 | 0.0000156 | 0.0000472 | 0.0000355 | 0.0000043 | 0.0000121 | 0.0003700 | 0.0000803 | 0.0040553 | 0.0006115 |



| OSU Argon Geochronology Lab |         |             |           |           |        |               |           |           |        |             |           |           |        |             |           |           |        |             |           |           |        |         |
|-----------------------------|---------|-------------|-----------|-----------|--------|---------------|-----------|-----------|--------|-------------|-----------|-----------|--------|-------------|-----------|-----------|--------|-------------|-----------|-----------|--------|---------|
| Intercept<br>Values         |         | 36Ar<br>[V] | 1σ        | r2        |        | 37Ar<br>[V]   | 1σ        | r2        |        | 38Ar<br>[V] | 1σ        | r2        |        | 39Ar<br>[V] | 1σ        | r2        |        | 40Ar<br>[V] | 1σ        | r2        |        |         |
|                             | 13C2034 | 500 °C      | 0.0008978 | 0.0000159 | 0.4574 | LIN #         | 0.0002752 | 0.0000290 | 0.0294 | EXP #       | 0.0001533 | 0.0000267 | 0.1034 | LIN #       | 0.0019024 | 0.0000207 | 0.9741 | EXP #       | 0.1870989 | 0.0004586 | 0.9845 | EXP #   |
|                             | 13C2036 | 600 °C      | 0.0030238 | 0.0000168 | 0.9323 | LIN #         | 0.0013372 | 0.0000283 | 0.0012 | EXP #       | 0.0008058 | 0.0000287 | 0.0233 | LIN #       | 0.0136350 | 0.0000326 | 0.9902 | EXP #       | 0.8683761 | 0.0014928 | 0.9930 | EXP #   |
|                             | 13C2037 | 700 °C      | 0.0042500 | 0.0000211 | 0.9532 | LIN #         | 0.0028376 | 0.0000286 | 0.5242 | EXP #       | 0.0014246 | 0.0000125 | 0.3108 | LIN #       | 0.0431440 | 0.0000446 | 0.9563 | EXP #       | 1.3746918 | 0.0017404 | 0.9962 | EXP #   |
|                             | 13C2039 | 800 °C      | 0.0072800 | 0.0000349 | 0.9806 | LIN # 1 3 7 9 | 0.0085906 | 0.0000232 | 0.9901 | EXP # 2 4 7 | 0.0032308 | 0.0000181 | 0.7674 | LIN #       | 0.1409018 | 0.0001168 | 0.9978 | EXP # 2     | 2.8052332 | 0.0010470 | 0.9997 | EXP # 2 |
|                             | 13C2040 | 900 °C      | 0.0043215 | 0.0000196 | 0.9505 | LIN #         | 0.0081036 | 0.0000232 | 0.9849 | EXP #       | 0.0024655 | 0.0000167 | 0.6078 | LIN #       | 0.1343824 | 0.0001785 | 0.9961 | EXP #       | 1.9250847 | 0.0015331 | 0.9983 | EXP #   |
|                             | 13C2042 | 1050 °C     | 0.0024200 | 0.0000144 | 0.8197 | LIN #         | 0.0104326 | 0.0000254 | 0.9940 | EXP # 4     | 0.0020751 | 0.0000147 | 0.8702 | LIN # 6     | 0.1273578 | 0.0001533 | 0.9976 | EXP #       | 1.3487464 | 0.0013734 | 0.9971 | EXP #   |
|                             | 13C2043 | 1250 °C     | 0.0012500 | 0.0000188 | 0.0060 | LIN #         | 0.0250041 | 0.0000638 | 0.9948 | EXP #       | 0.0016169 | 0.0000241 | 0.7135 | LIN #       | 0.1067775 | 0.0001638 | 0.9967 | EXP #       | 0.8672645 | 0.0003136 | 0.9996 | EXP # 1 |
|                             | 13C2045 | 1400 °C     | 0.0006733 | 0.0000168 | 0.0058 | LIN # 5       | 0.0136309 | 0.0000318 | 0.9957 | EXP #       | 0.0006351 | 0.0000169 | 0.0528 | LIN #       | 0.0443465 | 0.0000985 | 0.9935 | EXP # 1     | 0.3493229 | 0.0002565 | 0.9979 | EXP # 1 |
|                             |         |             |           |           |        |               |           |           |        |             |           |           |        |             |           |           |        |             |           |           |        |         |



| OSU Argon Geochronology Lab |  |         |          |          |            |                   |               |                  |       |                    |                    |                     |   |     |               |       |     |     |              |                        |        |       |      |      |      |        |             |       |         |         |         |            |           |         |    |
|-----------------------------|--|---------|----------|----------|------------|-------------------|---------------|------------------|-------|--------------------|--------------------|---------------------|---|-----|---------------|-------|-----|-----|--------------|------------------------|--------|-------|------|------|------|--------|-------------|-------|---------|---------|---------|------------|-----------|---------|----|
| Sample Parameters           |  | Sample  | Material | Location | Analyst    | Temp              | Standard Name | Standard (in Ma) | %1σ   | Standard Reference | Standard 40Ar/39Ar | %1σ                 | J | %1σ | Air 40Ar/36Ar | %1σ   | MDF | %1σ | Volume Ratio | Sensitivity (mol/volt) | Day    | Month | Year | Hour | Min  | Resist | Irradiation | X-pos | Y-pos   | Z/H-pos | Project | Experiment | Nmb       |         |    |
|                             |  | 13C2034 | 500 °C   | 189-1    | Groundmass | Kerguelen Plateau | Kyle Krawl    | 500              | FCT-3 | 28.201             | 0.083              | Kuiper et al., 2008 |   |     | 0.00162479    | 0.249 |     |     | 1.0092       | 0.001                  | 0.9988 | 2E-13 | 22   | JUL  | 2013 | 7      | 44          | 1     | OSU2C13 | 0.00    | 0.00    | 29.10      | Kerguelen | 13C2034 | 01 |
|                             |  | 13C2036 | 600 °C   | 189-1    | Groundmass | Kerguelen Plateau | Kyle Krawl    | 600              | FCT-3 | 28.201             | 0.083              | Kuiper et al., 2008 |   |     | 0.00162479    | 0.249 |     |     | 1.0092       | 0.001                  | 0.9983 | 2E-13 | 22   | JUL  | 2013 | 8      | 34          | 1     | OSU2C13 | 0.00    | 0.00    | 29.10      | Kerguelen | 13C2034 | 01 |
|                             |  | 13C2037 | 700 °C   | 189-1    | Groundmass | Kerguelen Plateau | Kyle Krawl    | 700              | FCT-3 | 28.201             | 0.083              | Kuiper et al., 2008 |   |     | 0.00162479    | 0.249 |     |     | 1.0092       | 0.001                  | 0.9982 | 2E-13 | 22   | JUL  | 2013 | 8      | 59          | 1     | OSU2C13 | 0.00    | 0.00    | 29.10      | Kerguelen | 13C2034 | 01 |
|                             |  | 13C2039 | 800 °C   | 189-1    | Groundmass | Kerguelen Plateau | Kyle Krawl    | 800              | FCT-3 | 28.201             | 0.083              | Kuiper et al., 2008 |   |     | 0.00162479    | 0.249 |     |     | 1.0092       | 0.001                  | 0.9983 | 2E-13 | 22   | JUL  | 2013 | 9      | 50          | 1     | OSU2C13 | 0.00    | 0.00    | 29.10      | Kerguelen | 13C2034 | 01 |
|                             |  | 13C2040 | 900 °C   | 189-1    | Groundmass | Kerguelen Plateau | Kyle Krawl    | 900              | FCT-3 | 28.201             | 0.083              | Kuiper et al., 2008 |   |     | 0.00162479    | 0.249 |     |     | 1.0092       | 0.001                  | 0.9983 | 2E-13 | 22   | JUL  | 2013 | 10     | 15          | 1     | OSU2C13 | 0.00    | 0.00    | 29.10      | Kerguelen | 13C2034 | 01 |
|                             |  | 13C2042 | 1050 °C  | 189-1    | Groundmass | Kerguelen Plateau | Trevor Smith  | 1050             | FCT-3 | 28.201             | 0.083              | Kuiper et al., 2008 |   |     | 0.00162479    | 0.249 |     |     | 1.0092       | 0.001                  | 0.9982 | 2E-13 | 22   | JUL  | 2013 | 11     | 6           | 1     | OSU2C13 | 0.00    | 0.00    | 29.10      | Kerguelen | 13C2034 | 01 |
|                             |  | 13C2043 | 1250 °C  | 189-1    | Groundmass | Kerguelen Plateau | Trevor Smith  | 1250             | FCT-3 | 28.201             | 0.083              | Kuiper et al., 2008 |   |     | 0.00162479    | 0.249 |     |     | 1.0092       | 0.001                  | 0.9981 | 2E-13 | 22   | JUL  | 2013 | 11     | 32          | 1     | OSU2C13 | 0.00    | 0.00    | 29.10      | Kerguelen | 13C2034 | 01 |
|                             |  | 13C2045 | 1400 °C  | 189-1    | Groundmass | Kerguelen Plateau | Trevor Smith  | 1400             | FCT-3 | 28.201             | 0.083              | Kuiper et al., 2008 |   |     | 0.00162479    | 0.249 |     |     | 1.0092       | 0.001                  | 0.9982 | 2E-13 | 22   | JUL  | 2013 | 12     | 24          | 1     | OSU2C13 | 0.00    | 0.00    | 29.10      | Kerguelen | 13C2034 | 01 |
|                             |  |         |          |          |            |                   |               |                  |       |                    |                    |                     |   |     |               |       |     |     |              |                        |        |       |      |      |      |        |             |       |         |         |         |            |           |         |    |



| OSU Argon Geochronology Lab |         |          |       |          |       |          |        |          |       |           |          |           |          |           |          |          |         |          |         |           |     |      |      |      |     |       |     |
|-----------------------------|---------|----------|-------|----------|-------|----------|--------|----------|-------|-----------|----------|-----------|----------|-----------|----------|----------|---------|----------|---------|-----------|-----|------|------|------|-----|-------|-----|
| Irradiation<br>Constants    |         | 40/36(a) | %1σ   | 40/36(c) | %1σ   | 38/36(a) | %1σ    | 38/36(c) | %1σ   | 39/37(ca) | %1σ      | 38/37(ca) | %1σ      | 36/37(ca) | %1σ      | 40/39(k) | %1σ     | 38/39(k) | %1σ     | 36/38(cl) | %1σ | K/Ca | %1σ  | K/Cl | %1σ | Ca/Cl | %1σ |
|                             | 13C2034 | 500 °C   | 295.5 | 0        | 0.018 | 35       | 0.1869 | 0        | 1.493 | 3         | 0.000673 | 0         | 0.000139 | 0         | 0.000264 | 0        | 0.00101 | 0        | 0.01138 | 0         | 0   | 0    | 0.43 | 0    | 0   | 0     | 0   |
|                             | 13C2036 | 600 °C   | 295.5 | 0        | 0.018 | 35       | 0.1869 | 0        | 1.493 | 3         | 0.000673 | 0         | 0.000139 | 0         | 0.000264 | 0        | 0.00101 | 0        | 0.01138 | 0         | 0   | 0    | 0.43 | 0    | 0   | 0     | 0   |
|                             | 13C2037 | 700 °C   | 295.5 | 0        | 0.018 | 35       | 0.1869 | 0        | 1.493 | 3         | 0.000673 | 0         | 0.000139 | 0         | 0.000264 | 0        | 0.00101 | 0        | 0.01138 | 0         | 0   | 0    | 0.43 | 0    | 0   | 0     | 0   |
|                             | 13C2039 | 800 °C   | 295.5 | 0        | 0.018 | 35       | 0.1869 | 0        | 1.493 | 3         | 0.000673 | 0         | 0.000139 | 0         | 0.000264 | 0        | 0.00101 | 0        | 0.01138 | 0         | 0   | 0    | 0.43 | 0    | 0   | 0     | 0   |
|                             | 13C2040 | 900 °C   | 295.5 | 0        | 0.018 | 35       | 0.1869 | 0        | 1.493 | 3         | 0.000673 | 0         | 0.000139 | 0         | 0.000264 | 0        | 0.00101 | 0        | 0.01138 | 0         | 0   | 0    | 0.43 | 0    | 0   | 0     | 0   |
|                             | 13C2042 | 1050 °C  | 295.5 | 0        | 0.018 | 35       | 0.1869 | 0        | 1.493 | 3         | 0.000673 | 0         | 0.000139 | 0         | 0.000264 | 0        | 0.00101 | 0        | 0.01138 | 0         | 0   | 0    | 0.43 | 0    | 0   | 0     | 0   |
|                             | 13C2043 | 1250 °C  | 295.5 | 0        | 0.018 | 35       | 0.1869 | 0        | 1.493 | 3         | 0.000673 | 0         | 0.000139 | 0         | 0.000264 | 0        | 0.00101 | 0        | 0.01138 | 0         | 0   | 0    | 0.43 | 0    | 0   | 0     | 0   |
|                             | 13C2045 | 1400 °C  | 295.5 | 0        | 0.018 | 35       | 0.1869 | 0        | 1.493 | 3         | 0.000673 | 0         | 0.000139 | 0         | 0.000264 | 0        | 0.00101 | 0        | 0.01138 | 0         | 0   | 0    | 0.43 | 0    | 0   | 0     | 0   |
|                             |         |          |       |          |       |          |        |          |       |           |          |           |          |           |          |          |         |          |         |           |     |      |      |      |     |       |     |



13C2034.AGE >>> 189-1 >>> KERGUELEN PROJECT

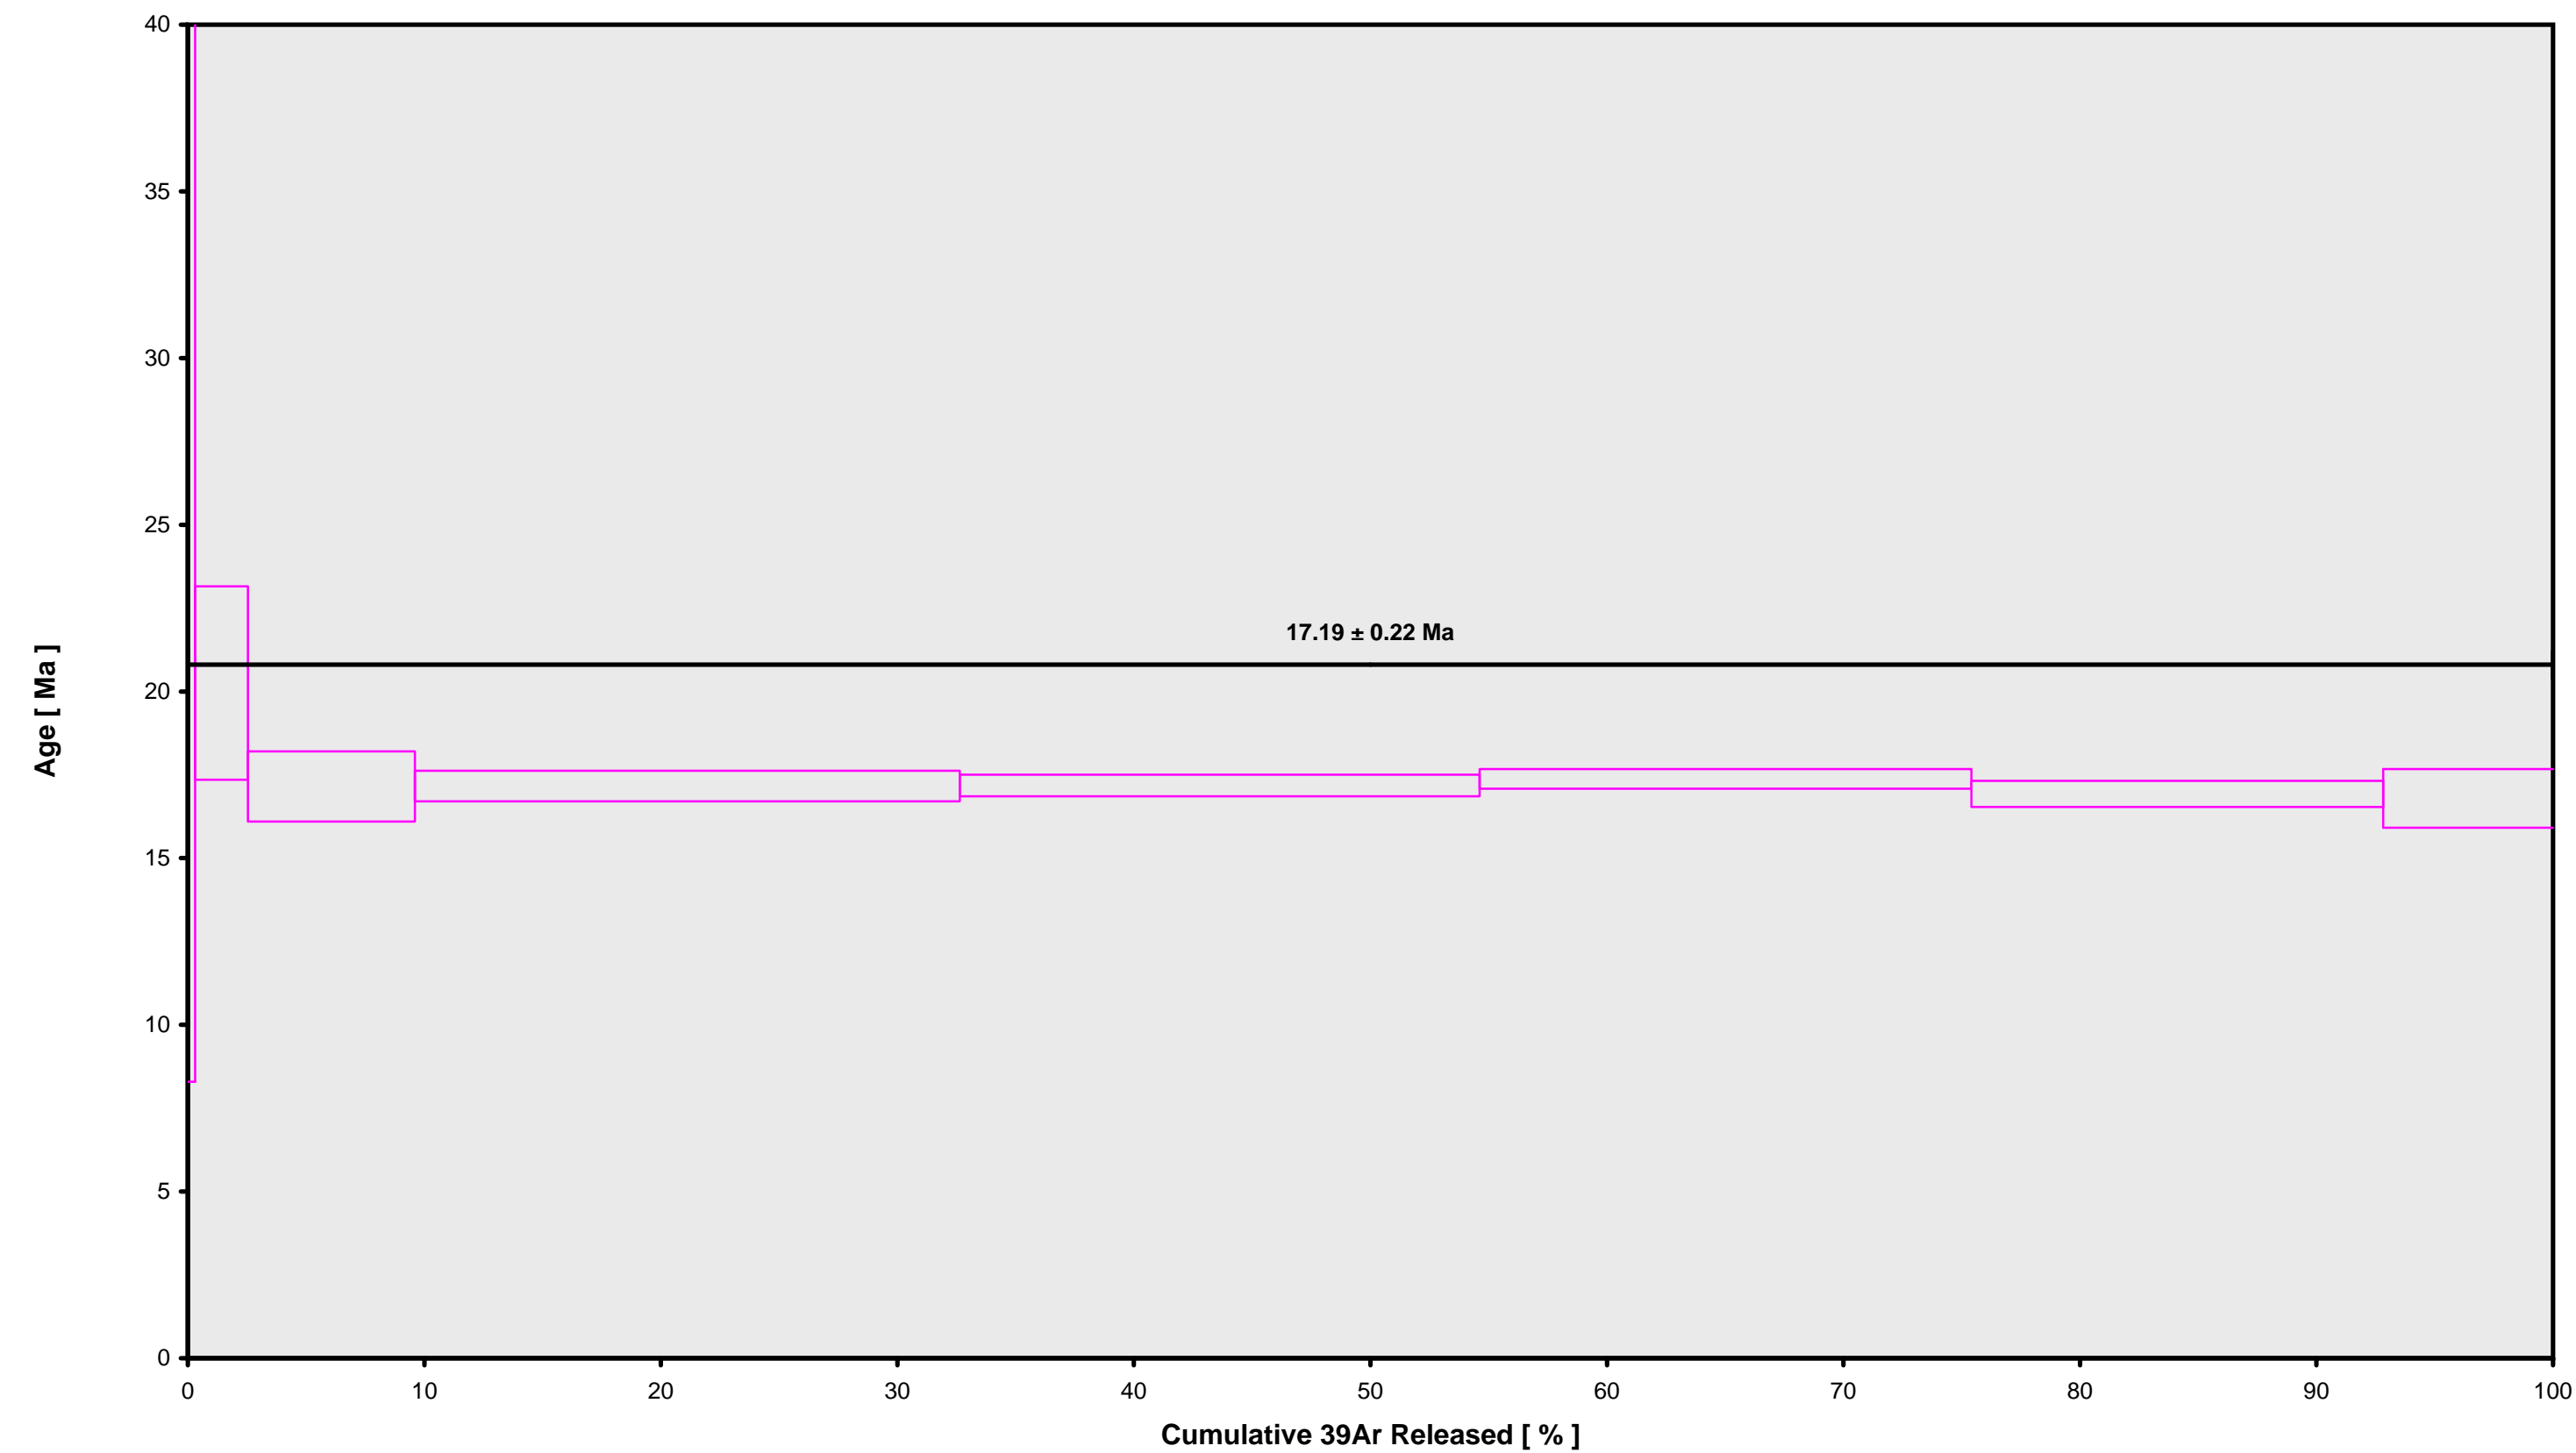

Ar-Ages in Ma

WEIGHTED PLATEAU

17.19 ± 0.22

TOTAL FUSION

17.25 ± 0.22

NORMAL ISOCHRON

17.03 ± 0.32

INVERSE ISOCHRON

17.04 ± 0.33

MSWD (PROBABILITY)

1.43 (19%)

Sample Info

Groundmass

Kerguelen Plateau

Kyle Krawl

IRR = OSU2C13

J = 0.00162479 ± 0.00000405

RECALIBRATED AGE



13C2034.AGE >>> 189-1 >>> KERGUELEN PROJECT

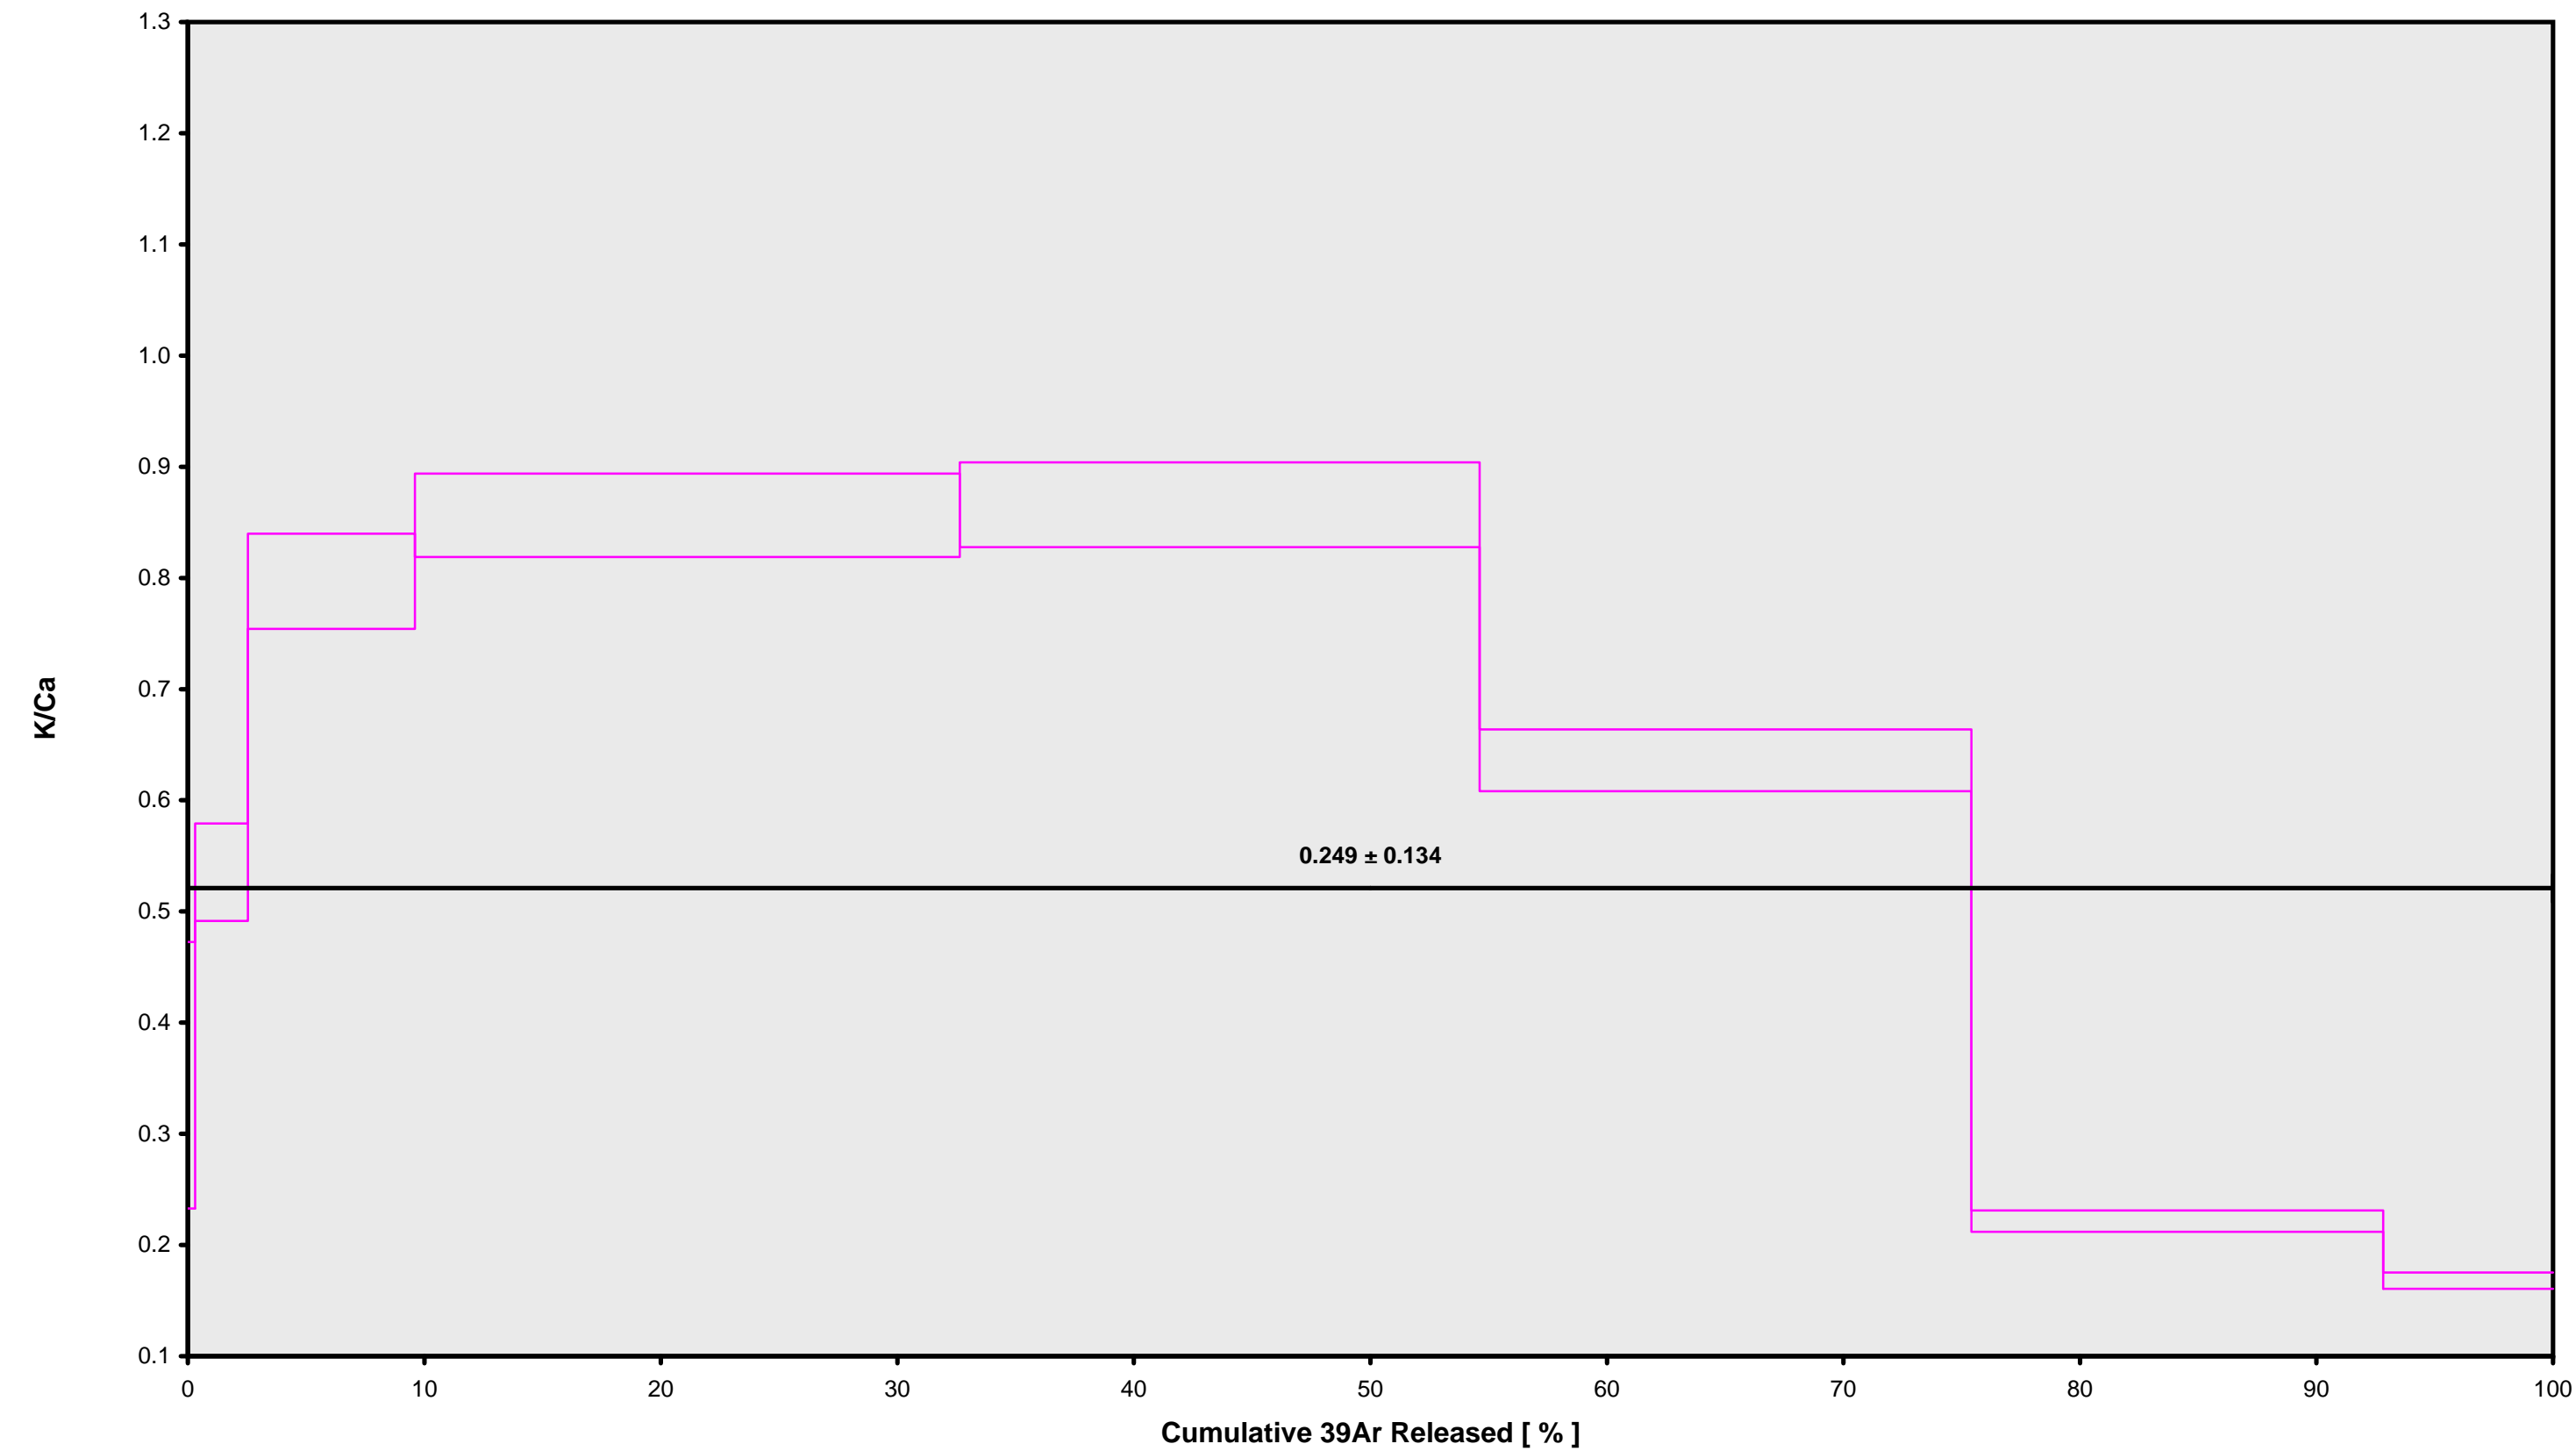

Ar-Ages in Ma

WEIGHTED PLATEAU

17.19 ± 0.22

TOTAL FUSION

17.25 ± 0.22

NORMAL ISOCHRON

17.03 ± 0.32

INVERSE ISOCHRON

17.04 ± 0.33

Sample Info

Groundmass

Kerguelen Plateau

Kyle Krawl

IRR = OSU2C13

J = 0.00162479 ± 0.00000405

RECALIBRATED AGE



13C2034.AGE >>> 189-1 >>> KERGUELEN PROJECT

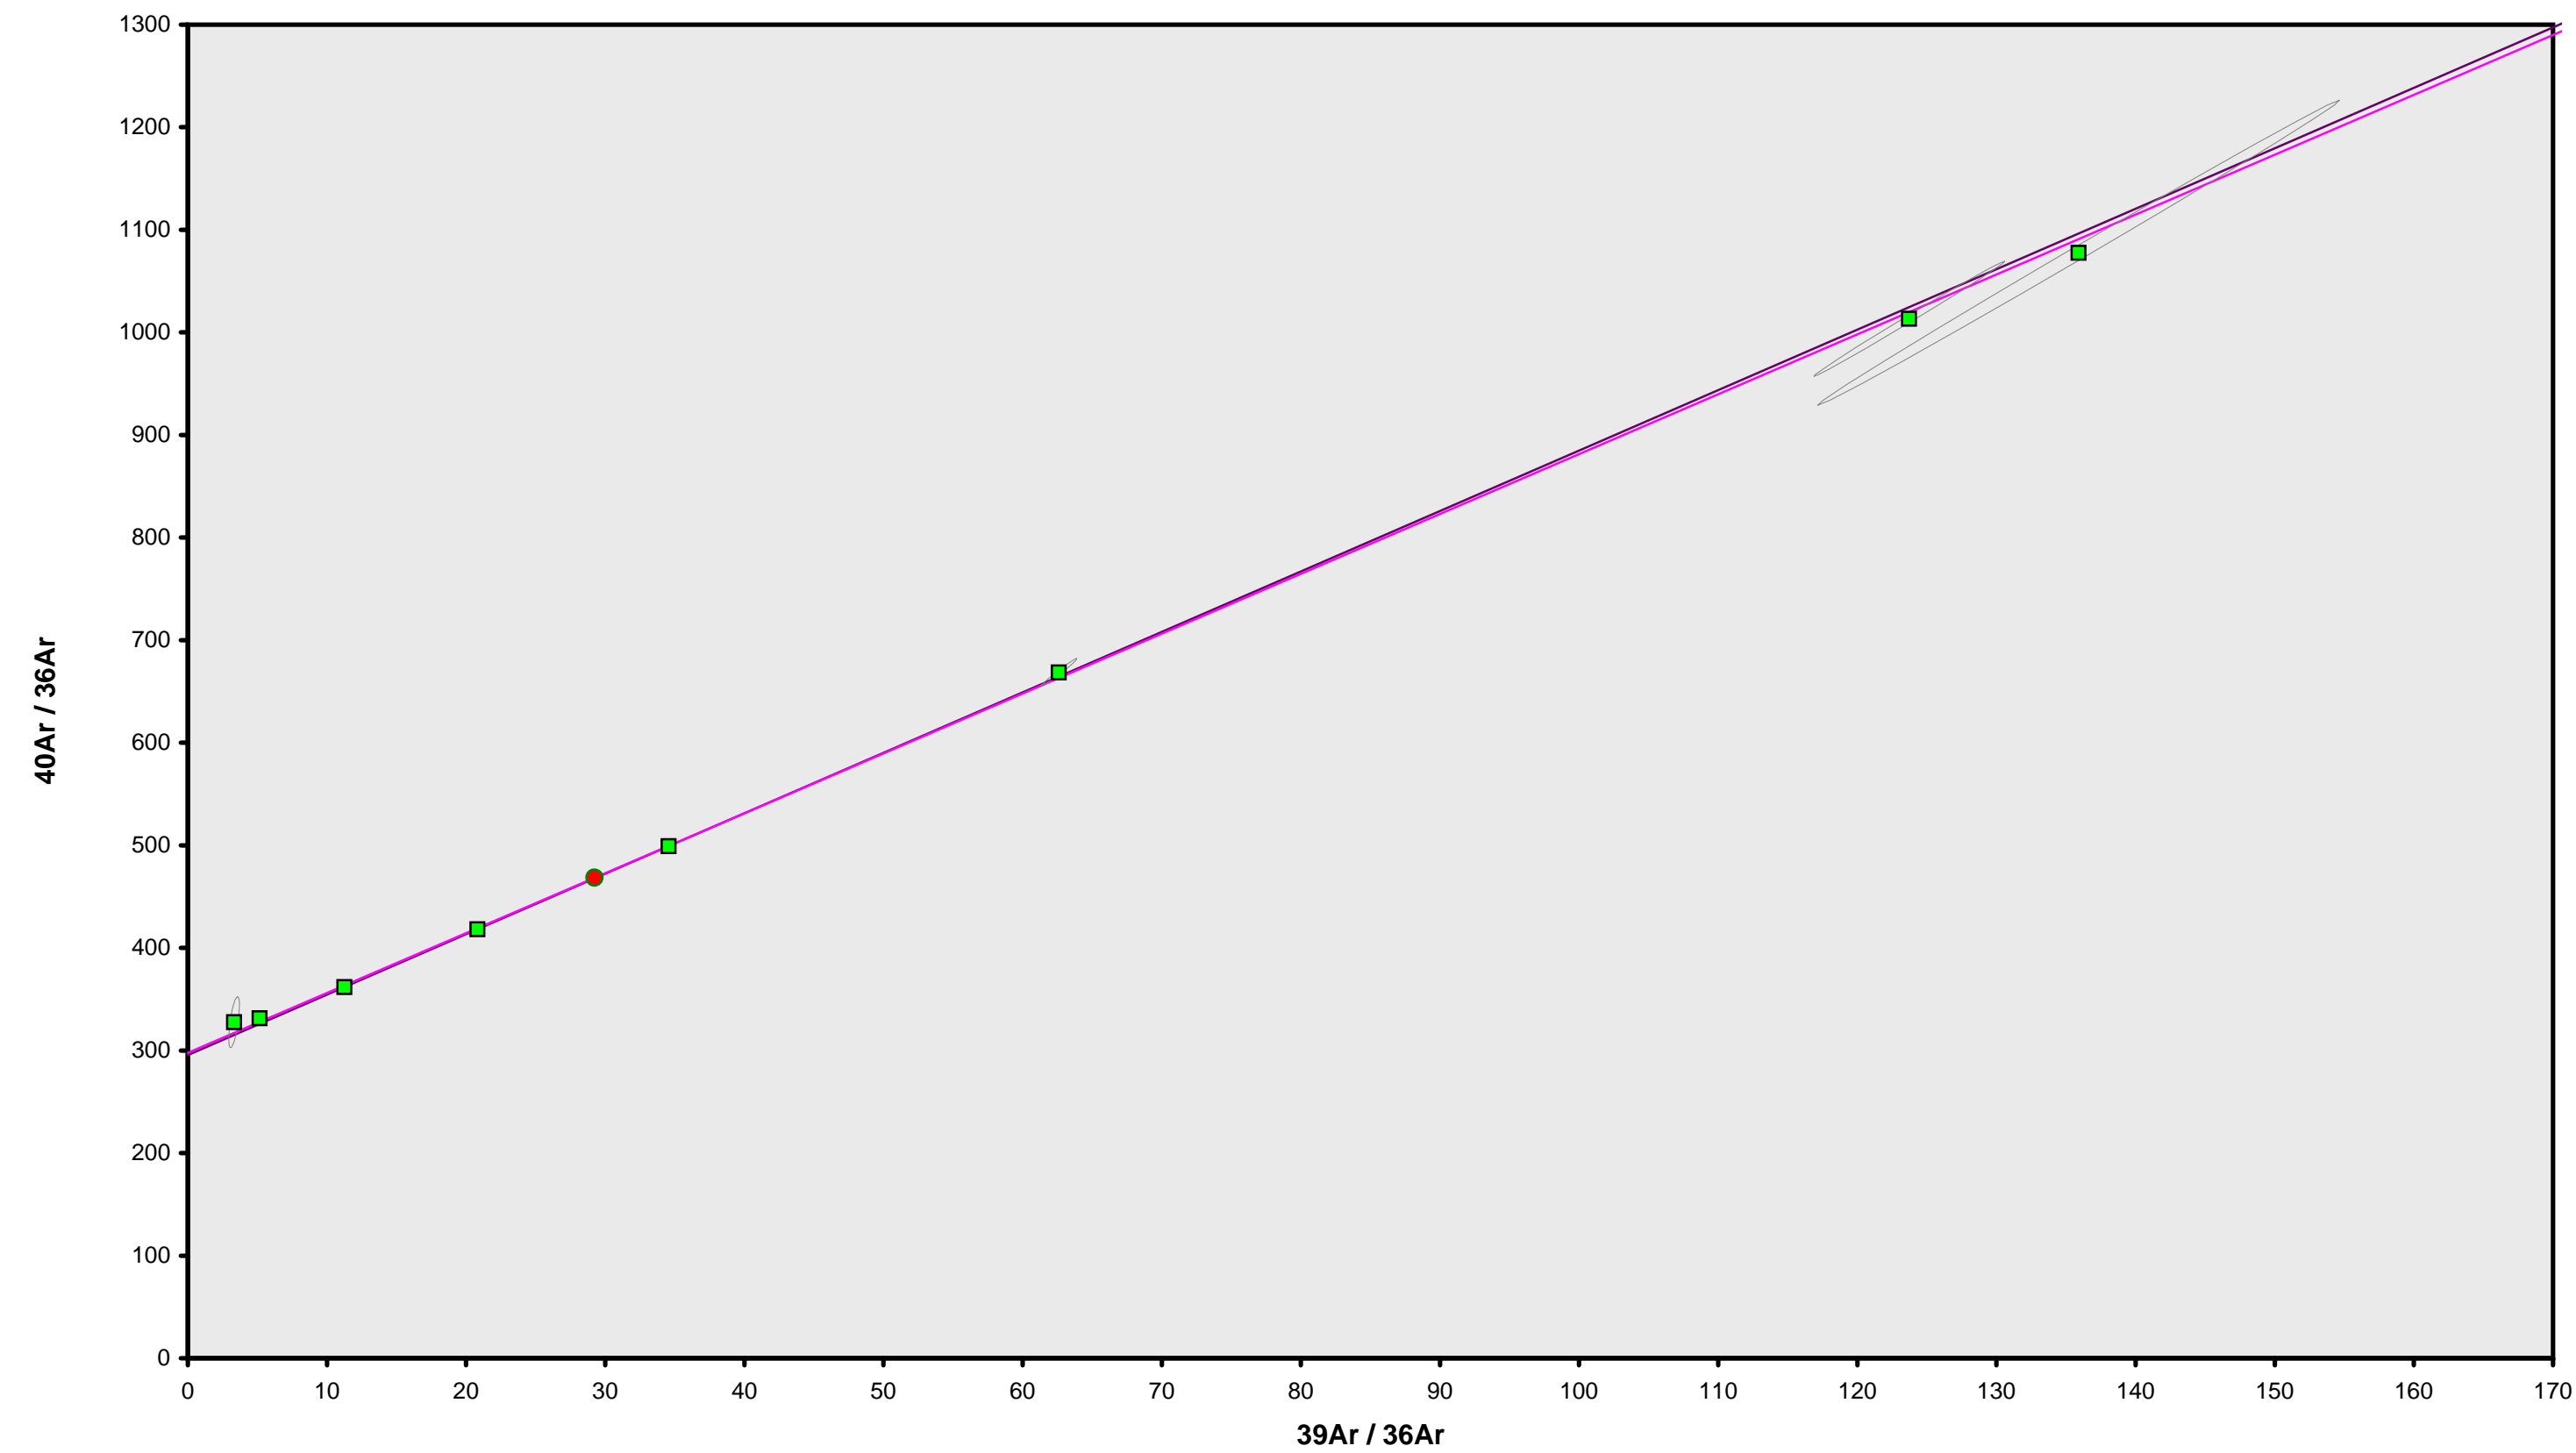

**Ar-Ages in Ma**

**WEIGHTED PLATEAU**  
17.19 ± 0.22

**TOTAL FUSION**  
17.25 ± 0.22

**NORMAL ISOCHRON**  
17.03 ± 0.32

**INVERSE ISOCHRON**  
17.04 ± 0.33

**MSWD (PROBABILITY)**  
1.29 (26%)

**40AR/36AR INTERCEPT**  
297.7 ± 3.4

**Sample Info**

Groundmass  
Kerguelen Plateau  
Kyle Krawl

IRR = OSU2C13  
J = 0.00162479 ± 0.00000405

**RECALIBRATED AGE**



13C2034.AGE >>> 189-1 >>> KERGUELEN PROJECT

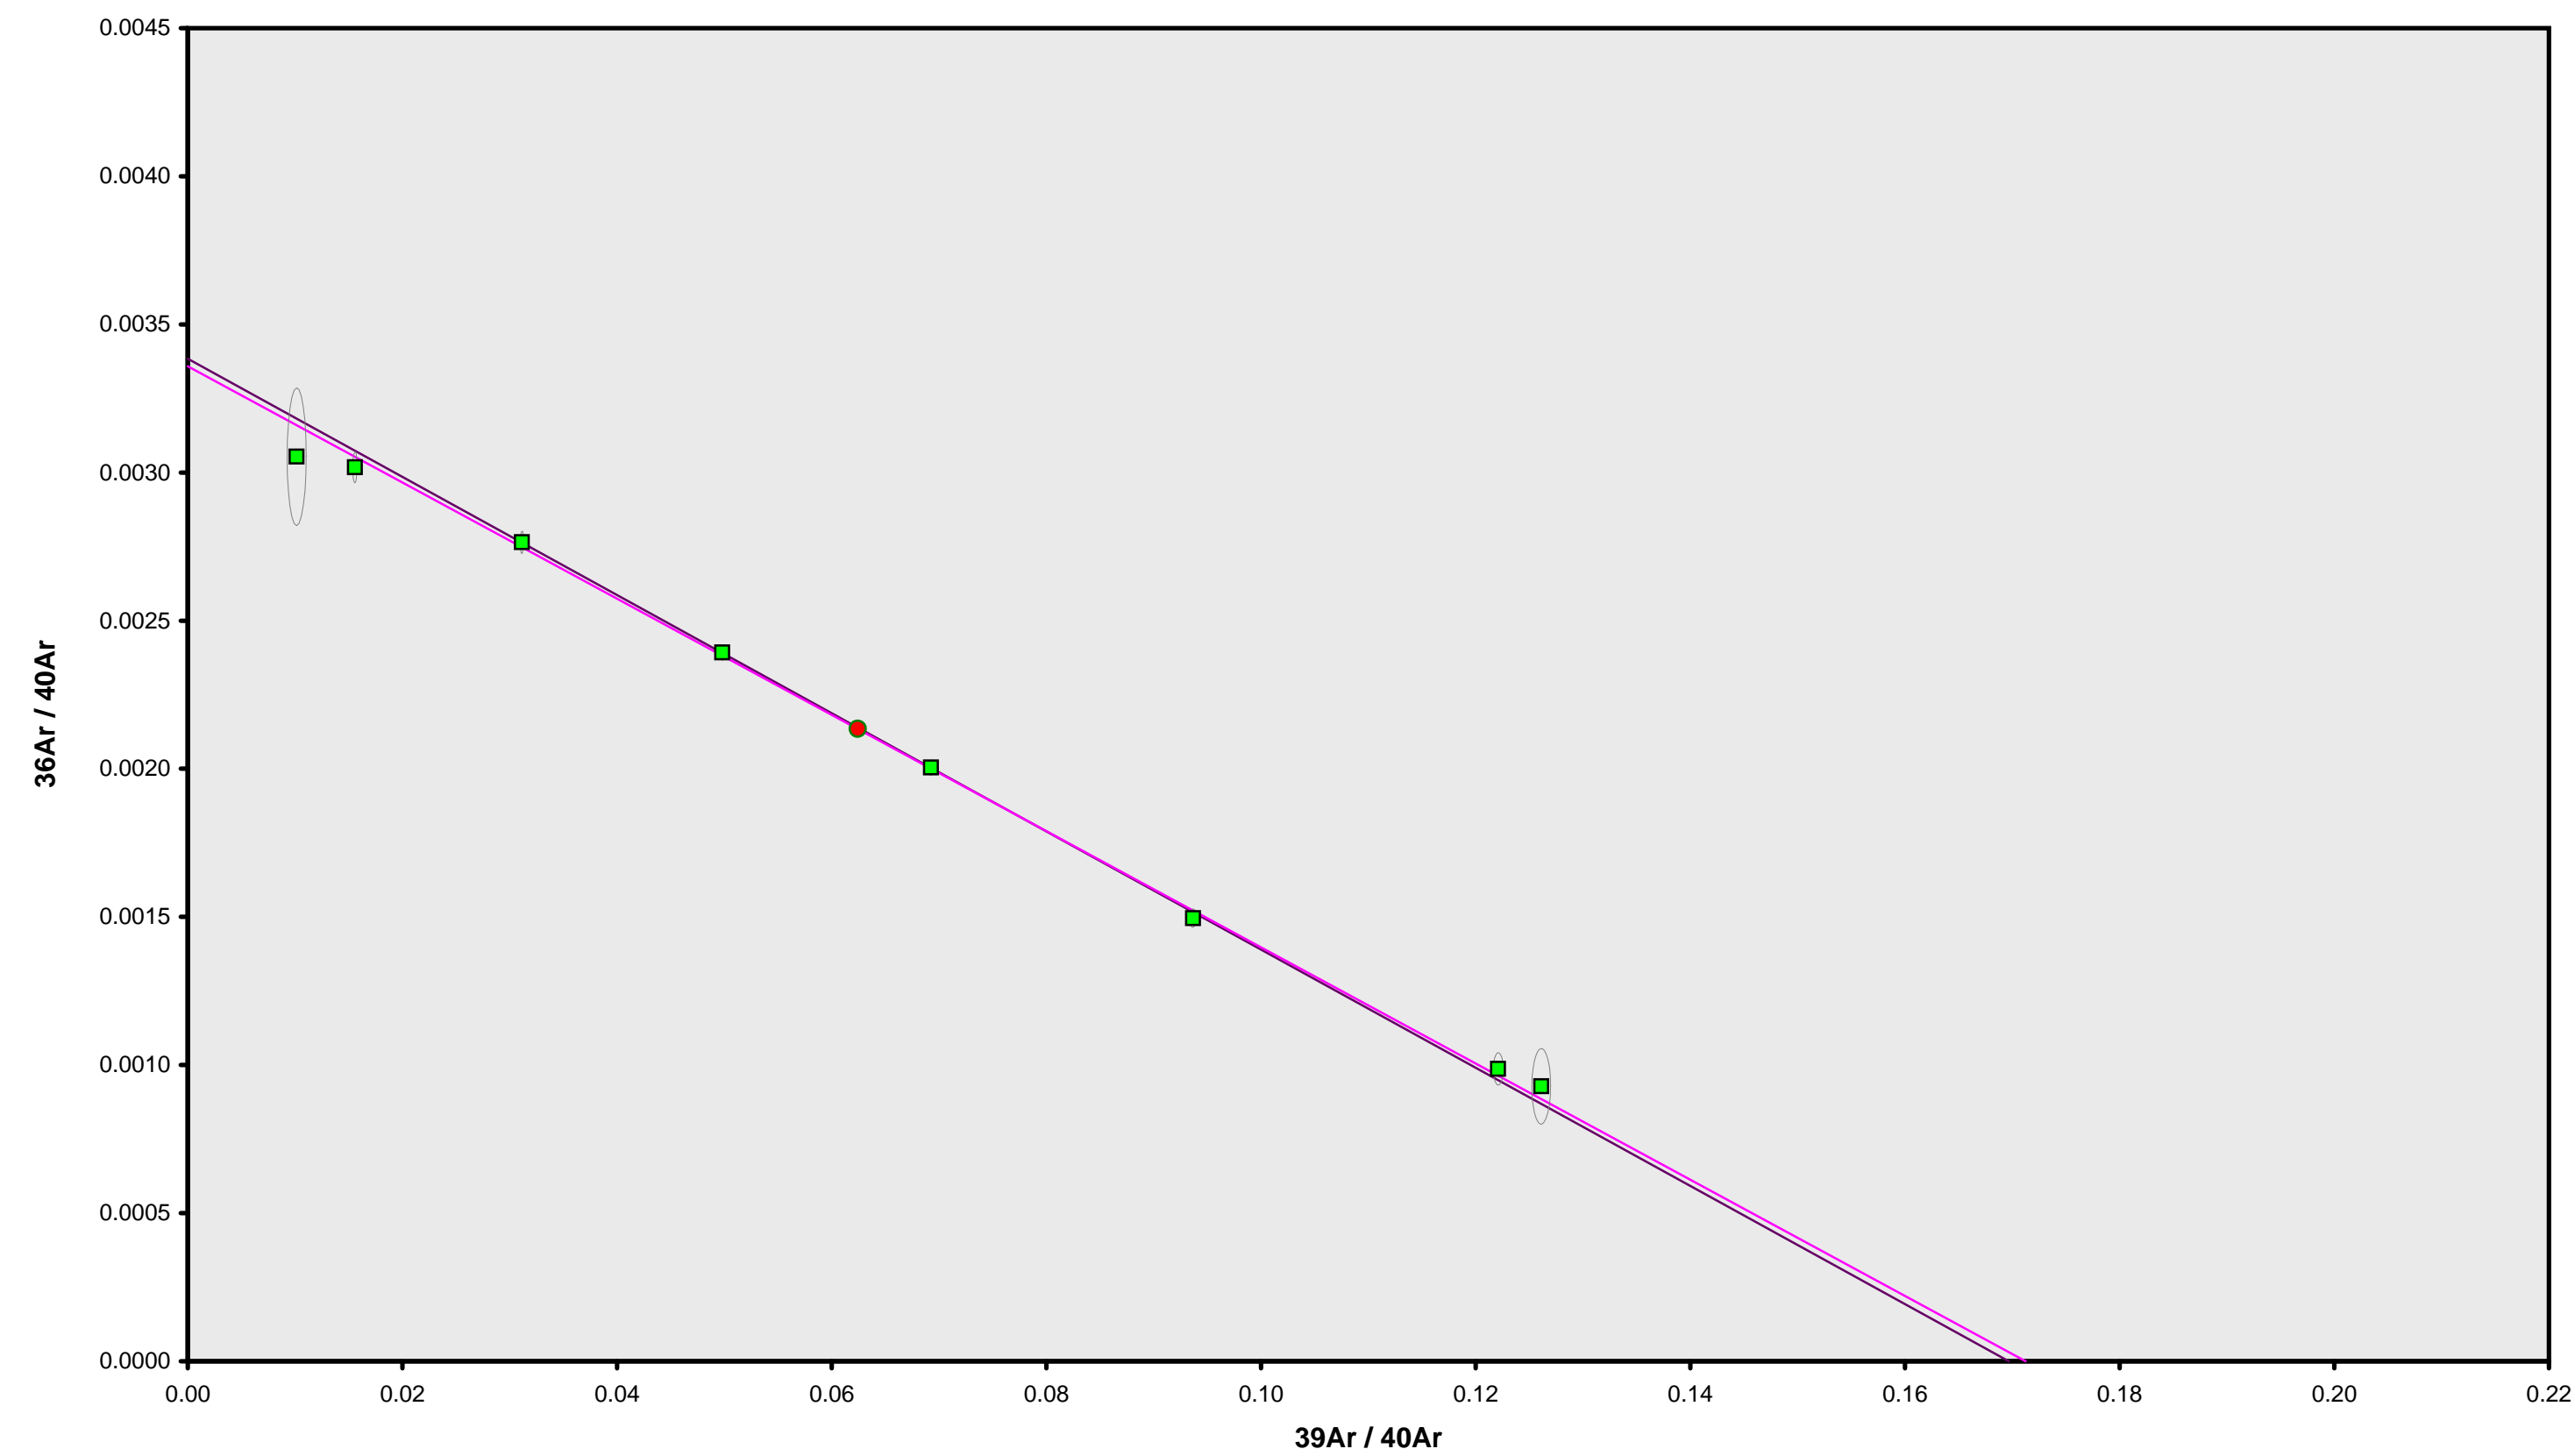

**Ar-Ages in Ma**

**WEIGHTED PLATEAU**  
17.19 ± 0.22

**TOTAL FUSION**  
17.25 ± 0.22

**NORMAL ISOCHRON**  
17.03 ± 0.32

**INVERSE ISOCHRON**  
17.04 ± 0.33

**MSWD (PROBABILITY)**  
1.31 (25%)

**SPREADING FACTOR**  
67.7%

**40AR/36AR INTERCEPT**  
297.7 ± 3.5

**Sample Info**

Groundmass  
Kerguelen Plateau  
Kyle Krawl

IRR = OSU2C13  
J = 0.00162479 ± 0.00000405

**RECALIBRATED AGE**



| Incremental Heating |         |   | 36Ar(a)<br>[V] | 37Ar(ca)<br>[V] | 38Ar(cl)<br>[V] | 39Ar(k)<br>[V] | 40Ar(r)<br>[V] | Age ± 2σ<br>(Ma) | 40Ar(r)<br>(%) | 39Ar(k)<br>(%) | K/Ca ± 2σ     |
|---------------------|---------|---|----------------|-----------------|-----------------|----------------|----------------|------------------|----------------|----------------|---------------|
| 13C2021             | 500 °C  | ✓ | 0.0004891      | 0.0040307       | 0.0000296       | 0.0031767      | 0.0129822      | 11.86 ± 11.63    | 8.24           | 0.62           | 0.339 ± 0.046 |
| 13C2023             | 600 °C  | ✓ | 0.0012819      | 0.0178387       | 0.0000310       | 0.0142174      | 0.0882548      | 17.98 ± 2.05     | 18.90          | 2.76           | 0.343 ± 0.017 |
| 13C2024             | 700 °C  | ✓ | 0.0007888      | 0.0275234       | 0.0000000       | 0.0246773      | 0.1604644      | 18.83 ± 0.90     | 40.77          | 4.79           | 0.386 ± 0.017 |
| 13C2026             | 800 °C  | ✓ | 0.0009677      | 0.0939527       | 0.0000484       | 0.0852166      | 0.5523856      | 18.77 ± 0.29     | 65.88          | 16.54          | 0.390 ± 0.016 |
| 13C2027             | 900 °C  | ✓ | 0.0004619      | 0.0954396       | 0.0001588       | 0.1178286      | 0.7590267      | 18.66 ± 0.23     | 84.75          | 22.87          | 0.531 ± 0.022 |
| 13C2029             | 1050 °C | ✓ | 0.0002757      | 0.0948560       | 0.0003481       | 0.1492331      | 0.9553686      | 18.54 ± 0.22     | 92.13          | 28.97          | 0.677 ± 0.028 |
| 13C2030             | 1250 °C | ✓ | 0.0002123      | 0.1179788       | 0.0003642       | 0.0890856      | 0.5597974      | 18.20 ± 0.25     | 89.91          | 17.29          | 0.325 ± 0.014 |
| 13C2032             | 1400 °C | ✓ | 0.0000900      | 0.0597947       | 0.0001455       | 0.0317086      | 0.2029086      | 18.53 ± 0.80     | 88.40          | 6.16           | 0.228 ± 0.010 |
| Σ                   |         |   | 0.0045673      | 0.5114148       | 0.0011255       | 0.5151439      | 3.2911882      |                  |                |                |               |

| Information on Analysis                                                                                                                                                                                                                        | Results          | 40(r)/39(k) ± 2σ | Age ± 2σ (Ma) | MSWD                       | 39Ar(k) (% ,n) | K/Ca ± 2σ           |
|------------------------------------------------------------------------------------------------------------------------------------------------------------------------------------------------------------------------------------------------|------------------|------------------|---------------|----------------------------|----------------|---------------------|
| Sample = 177-1<br>Material = Groundmass<br>Location = Kerguelen Plateau<br>Analyst = Trevor Smith<br>Project = KERGUELEN<br>Mass Discrimination Law = LIN<br>Irradiation = OSU2C13<br>J = 0.00161369 ± 0.00000405<br>FCT-3 = 28.201 ± 0.023 Ma | Age Plateau      | 6.40104          | ± 0.05619     | 1.84                       | 100.00         |                     |
|                                                                                                                                                                                                                                                | Recalibrated     |                  | ± 0.88%       | 18.54                      | 8              | 0.336 ± 0.083       |
|                                                                                                                                                                                                                                                |                  |                  |               | Full External Error ± 0.46 | 2.07           | 2σ Confidence Limit |
|                                                                                                                                                                                                                                                |                  |                  |               | Analytical Error ± 0.16    | 1.3583         | Error Magnification |
|                                                                                                                                                                                                                                                | Total Fusion Age | 6.38887          | ± 0.05337     |                            |                |                     |
|                                                                                                                                                                                                                                                | Recalibrated     |                  | ± 0.84%       | 18.50                      | 8              | 0.433 ± 0.008       |
|                                                                                                                                                                                                                                                |                  |                  |               | Full External Error ± 0.45 |                |                     |
|                                                                                                                                                                                                                                                |                  |                  |               | Analytical Error ± 0.15    |                |                     |



| Normal Isochron |         |   | 39(k)/36(a) ± 2σ | 40(a+r)/36(a) ± 2σ | r.i.   |
|-----------------|---------|---|------------------|--------------------|--------|
| 13C2021         | 500 °C  | ✓ | 6.50 ± 0.61      | 322.04 ± 28.45     | 0.9383 |
| 13C2023         | 600 °C  | ✓ | 11.09 ± 0.31     | 364.35 ± 9.71      | 0.9547 |
| 13C2024         | 700 °C  | ✓ | 31.29 ± 1.04     | 498.94 ± 16.43     | 0.9877 |
| 13C2026         | 800 °C  | ✓ | 88.06 ± 2.55     | 866.33 ± 25.09     | 0.9939 |
| 13C2027         | 900 °C  | ✓ | 255.07 ± 16.69   | 1938.61 ± 126.83   | 0.9990 |
| 13C2029         | 1050 °C | ✓ | 541.38 ± 74.81   | 3761.31 ± 519.75   | 0.9998 |
| 13C2030         | 1250 °C | ✓ | 419.57 ± 51.31   | 2931.97 ± 358.51   | 0.9998 |
| 13C2032         | 1400 °C | ✓ | 352.34 ± 115.14  | 2550.21 ± 833.25   | 0.9998 |

| Results         | 40(a)/36(a) ± 2σ      |         | 40(r)/39(k) ± 2σ     |           | Age ± 2σ (Ma)              | MSWD    |      |
|-----------------|-----------------------|---------|----------------------|-----------|----------------------------|---------|------|
| Normal Isochron | 298.14                | ± 8.92  | 6.37295              | ± 0.07728 | 18.46                      | ± 0.24  | 2.37 |
| Error Chron     |                       | ± 2.99% |                      | ± 1.21%   |                            | ± 1.31% | 3%   |
|                 |                       |         |                      |           | Full External Error ± 0.48 |         |      |
|                 |                       |         |                      |           | Analytical Error ± 0.22    |         |      |
| Statistics      | 2σ Confidence Limit   | 2.15    | Convergence          |           | 0.000000062903             |         |      |
|                 | Error Magnification   | 1.5411  | Number of Iterations |           | 459                        |         |      |
|                 | Number of Data Points | 8       | Calculated Line      |           | Weighted York-2            |         |      |



| Inverse Isochron |         |   | 39(k)/40(a+r) ± 2σ    | 36(a)/40(a+r) ± 2σ      | r.i.   |
|------------------|---------|---|-----------------------|-------------------------|--------|
| 13C2021          | 500 °C  | ✓ | 0.0201691 ± 0.0006548 | 0.00310516 ± 0.00027436 | 0.0075 |
| 13C2023          | 600 °C  | ✓ | 0.0304412 ± 0.0002517 | 0.00274462 ± 0.00007316 | 0.0148 |
| 13C2024          | 700 °C  | ✓ | 0.0627055 ± 0.0003262 | 0.00200425 ± 0.00006600 | 0.0066 |
| 13C2026          | 800 °C  | ✓ | 0.1016496 ± 0.0003251 | 0.00115429 ± 0.00003343 | 0.0472 |
| 13C2027          | 900 °C  | ✓ | 0.1315739 ± 0.0003857 | 0.00051583 ± 0.00003375 | 0.0140 |
| 13C2029          | 1050 °C | ✓ | 0.1439328 ± 0.0003974 | 0.00026587 ± 0.00003674 | 0.0065 |
| 13C2030          | 1250 °C | ✓ | 0.1431002 ± 0.0003407 | 0.00034107 ± 0.00004170 | 0.0059 |
| 13C2032          | 1400 °C | ✓ | 0.1381631 ± 0.0008261 | 0.00039212 ± 0.00012812 | 0.0014 |

| Results                          | 40(a)/36(a) ± 2σ                                                                        | 40(r)/39(k) ± 2σ             | Age ± 2σ (Ma)                                          | MSWD                                 |
|----------------------------------|-----------------------------------------------------------------------------------------|------------------------------|--------------------------------------------------------|--------------------------------------|
| Inverse Isochron<br>Recalibrated | 297.78 ± 8.35<br>± 2.80%                                                                | 6.38968 ± 0.07287<br>± 1.14% | 18.51 ± 0.23<br>± 1.24%                                | 2.05<br>6%                           |
|                                  |                                                                                         |                              | Full External Error ± 0.48<br>Analytical Error ± 0.21  |                                      |
| Statistics                       | 2σ Confidence Limit<br>Error Magnification<br>Number of Data Points<br>Spreading Factor | 2.15<br>1.4311<br>8<br>79.1% | Convergence<br>Number of Iterations<br>Calculated Line | 0.0000000009<br>4<br>Weighted York-2 |



| OSU Argon Geochronology Lab |         |   |           |           |           |           |           |           |           |           |           |           |                   |               |             |             |               |
|-----------------------------|---------|---|-----------|-----------|-----------|-----------|-----------|-----------|-----------|-----------|-----------|-----------|-------------------|---------------|-------------|-------------|---------------|
| Relative Abundances         |         |   | 40Ar      |           | 39Ar      |           | 38Ar      |           | 37Ar      |           | 36Ar      |           | 40(r)/39(k) ± 2σ  | Age ± 2σ (Ma) | 40Ar(r) (%) | 39Ar(k) (%) | K/Ca ± 2σ     |
|                             |         |   | [V]       | 1σ        |                   |               |             |             |               |
| 13C2021                     | 500 °C  | ✓ | 0.1575064 | 0.0003643 | 0.0031794 | 0.0000510 | 0.0001577 | 0.0000167 | 0.0040307 | 0.0002643 | 0.0004901 | 0.0000216 | 4.08669 ± 4.02287 | 11.86 ± 11.63 | 8.24        | 0.62        | 0.339 ± 0.046 |
| 13C2023                     | 600 °C  | ✓ | 0.4670580 | 0.0004217 | 0.0142294 | 0.0000574 | 0.0004349 | 0.0000194 | 0.0178387 | 0.0004280 | 0.0012866 | 0.0000170 | 6.20754 ± 0.71275 | 17.98 ± 2.05  | 18.90       | 2.76        | 0.343 ± 0.017 |
| 13C2024                     | 700 °C  | ✓ | 0.3935675 | 0.0002092 | 0.0246958 | 0.0000628 | 0.0004098 | 0.0000195 | 0.0275234 | 0.0006027 | 0.0007960 | 0.0000130 | 6.50251 ± 0.31306 | 18.83 ± 0.90  | 40.77       | 4.79        | 0.386 ± 0.017 |
| 13C2026                     | 800 °C  | ✓ | 0.8384225 | 0.0008766 | 0.0852798 | 0.0001031 | 0.0012121 | 0.0000248 | 0.0939527 | 0.0019700 | 0.0009925 | 0.0000140 | 6.48214 ± 0.10032 | 18.77 ± 0.29  | 65.88       | 16.54       | 0.390 ± 0.016 |
| 13C2027                     | 900 °C  | ✓ | 0.8956509 | 0.0007342 | 0.1178928 | 0.0001431 | 0.0015993 | 0.0000259 | 0.0954396 | 0.0019929 | 0.0004872 | 0.0000151 | 6.44179 ± 0.07837 | 18.66 ± 0.23  | 84.75       | 22.87       | 0.531 ± 0.022 |
| 13C2029                     | 1050 °C | ✓ | 1.0369755 | 0.0008176 | 0.1492969 | 0.0001691 | 0.0021111 | 0.0000213 | 0.0948560 | 0.0019841 | 0.0003008 | 0.0000190 | 6.40185 ± 0.07758 | 18.54 ± 0.22  | 92.13       | 28.97       | 0.677 ± 0.028 |
| 13C2030                     | 1250 °C | ✓ | 0.6226303 | 0.0004086 | 0.0891650 | 0.0000885 | 0.0014340 | 0.0000243 | 0.1179788 | 0.0024901 | 0.0002435 | 0.0000130 | 6.28381 ± 0.08750 | 18.20 ± 0.25  | 89.91       | 17.29       | 0.325 ± 0.014 |
| 13C2032                     | 1400 °C | ✓ | 0.2295336 | 0.0001919 | 0.0317489 | 0.0000910 | 0.0005314 | 0.0000213 | 0.0597947 | 0.0012603 | 0.0001058 | 0.0000147 | 6.39916 ± 0.27674 | 18.53 ± 0.80  | 88.40       | 6.16        | 0.228 ± 0.010 |

|   |  |  |           |           |           |           |           |           |           |           |           |           |  |  |  |  |
|---|--|--|-----------|-----------|-----------|-----------|-----------|-----------|-----------|-----------|-----------|-----------|--|--|--|--|
| Σ |  |  | 4.6413448 | 0.0015919 | 0.5154880 | 0.0002927 | 0.0078903 | 0.0000618 | 0.5114148 | 0.0044939 | 0.0047025 | 0.0000458 |  |  |  |  |
|---|--|--|-----------|-----------|-----------|-----------|-----------|-----------|-----------|-----------|-----------|-----------|--|--|--|--|

| Information on Analysis and Constants Used in Calculations |                                                                 | Results          |                  |               |      |               |           |  |
|------------------------------------------------------------|-----------------------------------------------------------------|------------------|------------------|---------------|------|---------------|-----------|--|
|                                                            |                                                                 | 40(a)/36(a) ± 2σ | 40(r)/39(k) ± 2σ | Age ± 2σ (Ma) | MSWD | 39Ar(k) (%.n) | K/Ca ± 2σ |  |
| Sample = 177-1                                             | Age Equations = Min et al. (2000)                               |                  |                  |               |      |               |           |  |
| Material = Groundmass                                      | Negative Intensities = Allowed                                  |                  |                  |               |      |               |           |  |
| Location = Kerguelen Plateau                               | Decay Constant 40K = 5.543 ± 0.044 E-10 1/a                     |                  |                  |               |      |               |           |  |
| Analyst = Trevor Smith                                     | Decay Constant 39Ar = 2.940 ± 0.029 E-07 1/h                    |                  |                  |               |      |               |           |  |
| Project = KERGUELEN                                        | Decay Constant 37Ar = 8.230 ± 0.082 E-04 1/h                    |                  |                  |               |      |               |           |  |
| Mass Discrimination Law = LIN                              | Decay Constant 36Cl = 2.236 ± 0.045 E-06 1/a                    |                  |                  |               |      |               |           |  |
| Irradiation = OSU2C13                                      | Decay Constant 40K(EC,β <sup>+</sup> ) = 0.580 ± 0.009 E-10 1/a |                  |                  |               |      |               |           |  |
| J = 0.00161369 ± 0.00000405                                | Decay Constant 40K(β <sup>-</sup> ) = 4.950 ± 0.043 E-10 1/a    |                  |                  |               |      |               |           |  |
| FCT-3 = 28.201 ± 0.023 Ma                                  | Atmospheric Ratio 40/36(a) = 295.50                             |                  |                  |               |      |               |           |  |
| IGSN = Undefined                                           | Atmospheric Ratio 38/36(a) = 0.1869                             |                  |                  |               |      |               |           |  |
| Preferred Age = Undefined                                  | Production Ratio 39/37(ca) = 0.000673                           |                  |                  |               |      |               |           |  |
| Classification = Undefined                                 | Production Ratio 38/37(ca) = 0.000139                           |                  |                  |               |      |               |           |  |
| Experiment Type = Undefined                                | Production Ratio 36/37(ca) = 0.000264                           |                  |                  |               |      |               |           |  |
| Extraction Method = Undefined                              | Production Ratio 40/39(k) = 0.001010                            |                  |                  |               |      |               |           |  |
| Heating = 0 sec                                            | Production Ratio 38/39(k) = 0.011380                            |                  |                  |               |      |               |           |  |
| Isolation = 15.00 min                                      | Production Ratio 36/38(cl) = 316.00 ± 15.80                     |                  |                  |               |      |               |           |  |
| Instrument = MAP215-50                                     | Scaling Ratio K/Ca = 0.430                                      |                  |                  |               |      |               |           |  |
| Lithology = Undefined                                      | Abundance Ratio 40K/K = 1.1700 ± 0.0199 E-04                    |                  |                  |               |      |               |           |  |
| Lat-Lon = Undefined - Undefined                            | Atomic Weight K = 39.0983 ± 0.0001 g                            |                  |                  |               |      |               |           |  |
| R1 ratio = Undefined                                       | Recalibrated to FCT-3 Secondary Standard                        |                  |                  |               |      |               |           |  |
| R2 ratio = Undefined                                       | Standard Age = 28.201 ± 0.023 Ma                                |                  |                  |               |      |               |           |  |
| R3 ratio = Undefined                                       |                                                                 |                  |                  |               |      |               |           |  |
| R4 ratio = Undefined                                       |                                                                 |                  |                  |               |      |               |           |  |
| R5 ratio = Undefined                                       |                                                                 |                  |                  |               |      |               |           |  |
| Collector Calibrations =                                   |                                                                 |                  |                  |               |      |               |           |  |
|                                                            |                                                                 |                  |                  |               |      |               |           |  |
|                                                            |                                                                 |                  |                  |               |      |               |           |  |
|                                                            |                                                                 |                  |                  |               |      |               |           |  |
|                                                            |                                                                 |                  |                  |               |      |               |           |  |
|                                                            |                                                                 |                  |                  |               |      |               |           |  |
|                                                            |                                                                 |                  |                  |               |      |               |           |  |
|                                                            |                                                                 |                  |                  |               |      |               |           |  |
|                                                            |                                                                 |                  |                  |               |      |               |           |  |
|                                                            |                                                                 |                  |                  |               |      |               |           |  |
|                                                            |                                                                 |                  |                  |               |      |               |           |  |
|                                                            |                                                                 |                  |                  |               |      |               |           |  |
|                                                            |                                                                 |                  |                  |               |      |               |           |  |
|                                                            |                                                                 |                  |                  |               |      |               |           |  |
|                                                            |                                                                 |                  |                  |               |      |               |           |  |
|                                                            |                                                                 |                  |                  |               |      |               |           |  |
|                                                            |                                                                 |                  |                  |               |      |               |           |  |
|                                                            |                                                                 |                  |                  |               |      |               |           |  |
|                                                            |                                                                 |                  |                  |               |      |               |           |  |
|                                                            |                                                                 |                  |                  |               |      |               |           |  |
|                                                            |                                                                 |                  |                  |               |      |               |           |  |
|                                                            |                                                                 |                  |                  |               |      |               |           |  |
|                                                            |                                                                 |                  |                  |               |      |               |           |  |
|                                                            |                                                                 |                  |                  |               |      |               |           |  |
|                                                            |                                                                 |                  |                  |               |      |               |           |  |
|                                                            |                                                                 |                  |                  |               |      |               |           |  |
|                                                            |                                                                 |                  |                  |               |      |               |           |  |
|                                                            |                                                                 |                  |                  |               |      |               |           |  |
|                                                            |                                                                 |                  |                  |               |      |               |           |  |
|                                                            |                                                                 |                  |                  |               |      |               |           |  |
|                                                            |                                                                 |                  |                  |               |      |               |           |  |
|                                                            |                                                                 |                  |                  |               |      |               |           |  |
|                                                            |                                                                 |                  |                  |               |      |               |           |  |
|                                                            |                                                                 |                  |                  |               |      |               |           |  |
|                                                            |                                                                 |                  |                  |               |      |               |           |  |
|                                                            |                                                                 |                  |                  |               |      |               |           |  |
|                                                            |                                                                 |                  |                  |               |      |               |           |  |
|                                                            |                                                                 |                  |                  |               |      |               |           |  |
|                                                            |                                                                 |                  |                  |               |      |               |           |  |
|                                                            |                                                                 |                  |                  |               |      |               |           |  |
|                                                            |                                                                 |                  |                  |               |      |               |           |  |
|                                                            |                                                                 |                  |                  |               |      |               |           |  |
|                                                            |                                                                 |                  |                  |               |      |               |           |  |
|                                                            |                                                                 |                  |                  |               |      |               |           |  |
|                                                            |                                                                 |                  |                  |               |      |               |           |  |
|                                                            |                                                                 |                  |                  |               |      |               |           |  |
|                                                            |                                                                 |                  |                  |               |      |               |           |  |
|                                                            |                                                                 |                  |                  |               |      |               |           |  |
|                                                            |                                                                 |                  |                  |               |      |               |           |  |
|                                                            |                                                                 |                  |                  |               |      |               |           |  |
|                                                            |                                                                 |                  |                  |               |      |               |           |  |
|                                                            |                                                                 |                  |                  |               |      |               |           |  |
|                                                            |                                                                 |                  |                  |               |      |               |           |  |
|                                                            |                                                                 |                  |                  |               |      |               |           |  |
|                                                            |                                                                 |                  |                  |               |      |               |           |  |
|                                                            |                                                                 |                  |                  |               |      |               |           |  |
|                                                            |                                                                 |                  |                  |               |      |               |           |  |
|                                                            |                                                                 |                  |                  |               |      |               |           |  |
|                                                            |                                                                 |                  |                  |               |      |               |           |  |
|                                                            |                                                                 |                  |                  |               |      |               |           |  |
|                                                            |                                                                 |                  |                  |               |      |               |           |  |
|                                                            |                                                                 |                  |                  |               |      |               |           |  |
|                                                            |                                                                 |                  |                  |               |      |               |           |  |
|                                                            |                                                                 |                  |                  |               |      |               |           |  |
|                                                            |                                                                 |                  |                  |               |      |               |           |  |
|                                                            |                                                                 |                  |                  |               |      |               |           |  |
|                                                            |                                                                 |                  |                  |               |      |               |           |  |
|                                                            |                                                                 |                  |                  |               |      |               |           |  |
|                                                            |                                                                 |                  |                  |               |      |               |           |  |
|                                                            |                                                                 |                  |                  |               |      |               |           |  |
|                                                            |                                                                 |                  |                  |               |      |               |           |  |
|                                                            |                                                                 |                  |                  |               |      |               |           |  |
|                                                            |                                                                 |                  |                  |               |      |               |           |  |
|                                                            |                                                                 |                  |                  |               |      |               |           |  |
|                                                            |                                                                 |                  |                  |               |      |               |           |  |
|                                                            |                                                                 |                  |                  |               |      |               |           |  |
|                                                            |                                                                 |                  |                  |               |      |               |           |  |
|                                                            |                                                                 |                  |                  |               |      |               |           |  |
|                                                            |                                                                 |                  |                  |               |      |               |           |  |
|                                                            |                                                                 |                  |                  |               |      |               |           |  |
|                                                            |                                                                 |                  |                  |               |      |               |           |  |
|                                                            |                                                                 |                  |                  |               |      |               |           |  |
|                                                            |                                                                 |                  |                  |               |      |               |           |  |
|                                                            |                                                                 |                  |                  |               |      |               |           |  |
|                                                            |                                                                 |                  |                  |               |      |               |           |  |
|                                                            |                                                                 |                  |                  |               |      |               |           |  |
|                                                            |                                                                 |                  |                  |               |      |               |           |  |
|                                                            |                                                                 |                  |                  |               |      |               |           |  |
|                                                            |                                                                 |                  |                  |               |      |               |           |  |
|                                                            |                                                                 |                  |                  |               |      |               |           |  |
|                                                            |                                                                 |                  |                  |               |      |               |           |  |
|                                                            |                                                                 |                  |                  |               |      |               |           |  |
|                                                            |                                                                 |                  |                  |               |      |               |           |  |
|                                                            |                                                                 |                  |                  |               |      |               |           |  |
|                                                            |                                                                 |                  |                  |               |      |               |           |  |
|                                                            |                                                                 |                  |                  |               |      |               |           |  |
|                                                            |                                                                 |                  |                  |               |      |               |           |  |
|                                                            |                                                                 |                  |                  |               |      |               |           |  |
|                                                            |                                                                 |                  |                  |               |      |               |           |  |
|                                                            |                                                                 |                  |                  |               |      |               |           |  |
|                                                            |                                                                 |                  |                  |               |      |               |           |  |
|                                                            |                                                                 |                  |                  |               |      |               |           |  |
|                                                            |                                                                 |                  |                  |               |      |               |           |  |
|                                                            |                                                                 |                  |                  |               |      |               |           |  |



| OSU Argon Geochronology Lab |         |         |                |           |                |           |                 |           |                 |           |                 |           |                |           |                |           |                |           |                 |           |                 |           |                |           |                 |           |                |           |                |           |                |           |                |           |      |
|-----------------------------|---------|---------|----------------|-----------|----------------|-----------|-----------------|-----------|-----------------|-----------|-----------------|-----------|----------------|-----------|----------------|-----------|----------------|-----------|-----------------|-----------|-----------------|-----------|----------------|-----------|-----------------|-----------|----------------|-----------|----------------|-----------|----------------|-----------|----------------|-----------|------|
| Degassing<br>Patterns       |         |         | 36Ar(a)<br>[V] | %1σ       | 36Ar(c)<br>[V] | %1σ       | 36Ar(ca)<br>[V] | %1σ       | 36Ar(cl)<br>[V] | %1σ       | 37Ar(ca)<br>[V] | %1σ       | 38Ar(a)<br>[V] | %1σ       | 38Ar(c)<br>[V] | %1σ       | 38Ar(k)<br>[V] | %1σ       | 38Ar(ca)<br>[V] | %1σ       | 38Ar(cl)<br>[V] | %1σ       | 39Ar(k)<br>[V] | %1σ       | 39Ar(ca)<br>[V] | %1σ       | 40Ar(r)<br>[V] | %1σ       | 40Ar(a)<br>[V] | %1σ       | 40Ar(c)<br>[V] | %1σ       | 40Ar(k)<br>[V] | %1σ       |      |
|                             | 13C2021 | 500 °C  | ✓              | 0.0004891 | 4.41           | 0.0000000 | 0.00            | 0.0000011 | 6.56            | 0.0000000 | 58.54           | 0.0040307 | 6.56           | 0.0000914 | 4.41           | 0.0000000 | 0.00           | 0.0000362 | 1.61            | 0.0000006 | 6.56            | 0.0000296 | 58.79          | 0.0031767 | 1.61            | 0.0000027 | 6.56           | 0.0129822 | 49.19          | 0.1445210 | 4.41           | 0.0000000 | 0.00           | 0.0000032 | 1.61 |
|                             | 13C2023 | 600 °C  | ✓              | 0.0012819 | 1.33           | 0.0000000 | 0.00            | 0.0000047 | 2.40            | 0.0000000 | 63.56           | 0.0178387 | 2.40           | 0.0002396 | 1.33           | 0.0000000 | 0.00           | 0.0001618 | 0.40            | 0.0000025 | 2.40            | 0.0000310 | 63.79          | 0.0142174 | 0.40            | 0.0000120 | 2.40           | 0.0882548 | 5.73           | 0.3787888 | 1.33           | 0.0000000 | 0.00           | 0.0000144 | 0.40 |
|                             | 13C2024 | 700 °C  | ✓              | 0.0007888 | 1.65           | 0.0000000 | 0.00            | 0.0000073 | 2.19            | 0.0000000 | 0.00            | 0.0275234 | 2.19           | 0.0001474 | 1.65           | 0.0000000 | 0.00           | 0.0002808 | 0.25            | 0.0000038 | 2.19            | 0.0000000 | 0.00           | 0.0246773 | 0.25            | 0.0000185 | 2.19           | 0.1604644 | 2.39           | 0.2330783 | 1.65           | 0.0000000 | 0.00           | 0.0000249 | 0.25 |
|                             | 13C2026 | 800 °C  | ✓              | 0.0009677 | 1.44           | 0.0000000 | 0.00            | 0.0000248 | 2.10            | 0.0000000 | 51.88           | 0.0939527 | 2.10           | 0.0001809 | 1.44           | 0.0000000 | 0.00           | 0.0009698 | 0.12            | 0.0000131 | 2.10            | 0.0000484 | 52.16          | 0.0852166 | 0.12            | 0.0000632 | 2.10           | 0.5523856 | 0.76           | 0.2859509 | 1.44           | 0.0000000 | 0.00           | 0.0000861 | 0.12 |
|                             | 13C2027 | 900 °C  | ✓              | 0.0004619 | 3.27           | 0.0000000 | 0.00            | 0.0000252 | 2.09            | 0.0000000 | 17.27           | 0.0954396 | 2.09           | 0.0000863 | 3.27           | 0.0000000 | 0.00           | 0.0013409 | 0.12            | 0.0000133 | 2.09            | 0.0001588 | 18.09          | 0.1178286 | 0.12            | 0.0000642 | 2.09           | 0.7590267 | 0.60           | 0.1365052 | 3.27           | 0.0000000 | 0.00           | 0.0001190 | 0.12 |
|                             | 13C2029 | 1050 °C | ✓              | 0.0002757 | 6.91           | 0.0000000 | 0.00            | 0.0000250 | 2.09            | 0.0000001 | 8.24            | 0.0948560 | 2.09           | 0.0000515 | 6.91           | 0.0000000 | 0.00           | 0.0016983 | 0.11            | 0.0000132 | 2.09            | 0.0003481 | 9.85           | 0.1492331 | 0.11            | 0.0000638 | 2.09           | 0.9553686 | 0.60           | 0.0814562 | 6.91           | 0.0000000 | 0.00           | 0.0001507 | 0.11 |
|                             | 13C2030 | 1250 °C | ✓              | 0.0002123 | 6.11           | 0.0000000 | 0.00            | 0.0000311 | 2.11            | 0.0000001 | 8.61            | 0.1179788 | 2.11           | 0.0000397 | 6.11           | 0.0000000 | 0.00           | 0.0010138 | 0.10            | 0.0000164 | 2.11            | 0.0003642 | 10.16          | 0.0890856 | 0.10            | 0.0000794 | 2.11           | 0.5597974 | 0.69           | 0.0627430 | 6.11           | 0.0000000 | 0.00           | 0.0000900 | 0.10 |
|                             | 13C2032 | 1400 °C | ✓              | 0.0000900 | 16.34          | 0.0000000 | 0.00            | 0.0000158 | 2.11            | 0.0000000 | 15.72           | 0.0597947 | 2.11           | 0.0000168 | 16.34          | 0.0000000 | 0.00           | 0.0003608 | 0.29            | 0.0000083 | 2.11            | 0.0001455 | 16.61          | 0.0317086 | 0.29            | 0.0000402 | 2.11           | 0.2029086 | 2.14           | 0.0265930 | 16.34          | 0.0000000 | 0.00           | 0.0000320 | 0.29 |
|                             |         | Σ       |                | 0.0045673 | 1.00           | 0.0000000 | 0.00            | 0.0001350 | 0.88            | 0.0000002 | 5.89            | 0.5114148 | 0.88           | 0.0008536 | 1.00           | 0.0000000 | 0.00           | 0.0058623 | 0.06            | 0.0000711 | 0.88            | 0.0011255 | 6.46           | 0.5151439 | 0.06            | 0.0003442 | 0.88           | 3.2911882 | 0.41           | 1.3496363 | 1.00           | 0.0000000 | 0.00           | 0.0005203 | 0.06 |
|                             |         | Σ       |                |           |                |           |                 |           |                 |           | 0.0047025       | 0.97      | 0.5114148      | 0.88      |                |           |                |           |                 |           |                 | 0.0079126 | 0.93           |           |                 | 0.5154880 | 0.06           |           |                |           |                |           |                | 4.6413448 | 0.41 |



| Additional Parameters |         |   | 40Ar/39Ar | 1σ       | 37Ar/39Ar | 1σ       | 36Ar/39Ar | 1σ       | Time (days) | 37Ar (decay) | 39Ar (decay) | 40Ar (moles) |
|-----------------------|---------|---|-----------|----------|-----------|----------|-----------|----------|-------------|--------------|--------------|--------------|
| 13C2021               | 500 °C  | ✓ | 49.539443 | 0.803515 | 1.267761  | 0.085573 | 0.154161  | 0.007224 | 104.922     | 7.963684     | 1.00074149   | 3.150E-14    |
| 13C2023               | 600 °C  | ✓ | 32.823552 | 0.135608 | 1.253657  | 0.030498 | 0.090417  | 0.001252 | 104.959     | 7.969476     | 1.00074175   | 9.341E-14    |
| 13C2024               | 700 °C  | ✓ | 15.936607 | 0.041417 | 1.114498  | 0.024570 | 0.032233  | 0.000532 | 104.977     | 7.972318     | 1.00074188   | 7.871E-14    |
| 13C2026               | 800 °C  | ✓ | 9.831431  | 0.015713 | 1.101700  | 0.023139 | 0.011638  | 0.000164 | 105.012     | 7.977897     | 1.00074213   | 1.677E-13    |
| 13C2027               | 900 °C  | ✓ | 7.597163  | 0.011129 | 0.809546  | 0.016933 | 0.004132  | 0.000128 | 105.030     | 7.980634     | 1.00074225   | 1.791E-13    |
| 13C2029               | 1050 °C | ✓ | 6.945726  | 0.009584 | 0.635351  | 0.013309 | 0.002015  | 0.000128 | 105.067     | 7.986547     | 1.00074251   | 2.074E-13    |
| 13C2030               | 1250 °C | ✓ | 6.982899  | 0.008306 | 1.323151  | 0.027958 | 0.002731  | 0.000145 | 105.089     | 7.989944     | 1.00074266   | 1.245E-13    |
| 13C2032               | 1400 °C | ✓ | 7.229659  | 0.021588 | 1.883365  | 0.040060 | 0.003333  | 0.000463 | 105.126     | 7.995864     | 1.00074293   | 4.591E-14    |



| Procedure<br>Blanks |         | 36Ar<br>[V] | 1σ        | 37Ar<br>[V] | 1σ        | 38Ar<br>[V] | 1σ        | 39Ar<br>[V] | 1σ        | 40Ar<br>[V] | 1σ        |
|---------------------|---------|-------------|-----------|-------------|-----------|-------------|-----------|-------------|-----------|-------------|-----------|
| 13C2021             | 500 °C  | 0.0003101   | 0.0000114 | 0.0000073   | 0.0000164 | 0.0000160   | 0.0000143 | 0.0000351   | 0.0000498 | 0.0017627   | 0.0000667 |
| 13C2023             | 600 °C  | 0.0003099   | 0.0000114 | 0.0000145   | 0.0000164 | 0.0000166   | 0.0000143 | 0.0000386   | 0.0000498 | 0.0017888   | 0.0000667 |
| 13C2024             | 700 °C  | 0.0003101   | 0.0000114 | 0.0000180   | 0.0000164 | 0.0000169   | 0.0000143 | 0.0000403   | 0.0000498 | 0.0018386   | 0.0000667 |
| 13C2026             | 800 °C  | 0.0003112   | 0.0000114 | 0.0000250   | 0.0000164 | 0.0000175   | 0.0000143 | 0.0000436   | 0.0000498 | 0.0020855   | 0.0000667 |
| 13C2027             | 900 °C  | 0.0003120   | 0.0000114 | 0.0000284   | 0.0000164 | 0.0000178   | 0.0000143 | 0.0000452   | 0.0000498 | 0.0022900   | 0.0000667 |
| 13C2029             | 1050 °C | 0.0003145   | 0.0000114 | 0.0000357   | 0.0000164 | 0.0000184   | 0.0000143 | 0.0000487   | 0.0000498 | 0.0028969   | 0.0000667 |
| 13C2030             | 1250 °C | 0.0003164   | 0.0000114 | 0.0000399   | 0.0000164 | 0.0000188   | 0.0000143 | 0.0000508   | 0.0000498 | 0.0033063   | 0.0000667 |
| 13C2032             | 1400 °C | 0.0003203   | 0.0000114 | 0.0000473   | 0.0000164 | 0.0000194   | 0.0000143 | 0.0000543   | 0.0000498 | 0.0039703   | 0.0000667 |



| OSU Argon Geochronology Lab |         |           |           |        |               |           |           |        |           |           |           |        |         |           |           |        |              |           |           |        |
|-----------------------------|---------|-----------|-----------|--------|---------------|-----------|-----------|--------|-----------|-----------|-----------|--------|---------|-----------|-----------|--------|--------------|-----------|-----------|--------|
| Intercept Values            |         | 36Ar [V]  | 1σ        | r2     |               | 37Ar [V]  | 1σ        | r2     |           | 38Ar [V]  | 1σ        | r2     |         | 39Ar [V]  | 1σ        | r2     |              | 40Ar [V]  | 1σ        | r2     |
| 13C2021                     | 500 °C  | 0.0008198 | 0.0000193 | 0.3013 | LIN #         | 0.0005284 | 0.0000279 | 0.1216 | EXP #     | 0.0001769 | 0.0000093 | 0.7408 | LIN # 6 | 0.0032475 | 0.0000132 | 0.9949 | EXP #        | 0.1595722 | 0.0003589 | 0.8952 |
| 13C2023                     | 600 °C  | 0.0016469 | 0.0000135 | 0.8381 | LIN #         | 0.0023190 | 0.0000223 | 0.8412 | EXP #     | 0.0004604 | 0.0000137 | 0.0410 | LIN #   | 0.0144153 | 0.0000296 | 0.8788 | EXP # 5      | 0.4697393 | 0.0004172 | 0.9977 |
| 13C2024                     | 700 °C  | 0.0011375 | 0.0000071 | 0.9262 | LIN # 1 5 7 9 | 0.0035720 | 0.0000185 | 0.9664 | EXP #     | 0.0004350 | 0.0000138 | 0.3931 | LIN #   | 0.0249893 | 0.0000393 | 0.9900 | EXP # 1      | 0.3961191 | 0.0001987 | 0.9994 |
| 13C2026                     | 800 °C  | 0.0013426 | 0.0000089 | 0.7081 | EXP # 2 5 7   | 0.0121480 | 0.0000311 | 0.9930 | LIN #     | 0.0012541 | 0.0000209 | 0.1459 | LIN #   | 0.0861978 | 0.0000914 | 0.9983 | EXP # 7 10   | 0.8420237 | 0.0008756 | 0.9973 |
| 13C2027                     | 900 °C  | 0.0008187 | 0.0000107 | 0.7402 | LIN #         | 0.0123403 | 0.0000208 | 0.9970 | EXP #     | 0.0016496 | 0.0000222 | 0.6067 | LIN #   | 0.1191587 | 0.0001357 | 0.9988 | EXP # 3 5    | 0.8996502 | 0.0007325 | 0.9976 |
| 13C2029                     | 1050 °C | 0.0006275 | 0.0000161 | 0.6894 | LIN #         | 0.0122621 | 0.0000245 | 0.9957 | EXP #     | 0.0021723 | 0.0000164 | 0.8328 | LIN #   | 0.1508763 | 0.0001634 | 0.9985 | EXP # 9      | 1.0417475 | 0.0008163 | 0.9984 |
| 13C2030                     | 1250 °C | 0.0005699 | 0.0000071 | 0.8462 | EXP # 6 7     | 0.0152402 | 0.0000536 | 0.9929 | EXP # 2 6 | 0.0014819 | 0.0000203 | 0.7231 | LIN #   | 0.0901300 | 0.0000742 | 0.9994 | EXP # 2 5 11 | 0.6270653 | 0.0004038 | 0.9991 |
| 13C2032                     | 1400 °C | 0.0004308 | 0.0000101 | 0.6932 | LIN #         | 0.0077463 | 0.0000210 | 0.9942 | EXP #     | 0.0005617 | 0.0000163 | 0.2655 | LIN #   | 0.0321320 | 0.0000773 | 0.9915 | EXP # 4      | 0.2339484 | 0.0001802 | 0.9958 |



| OSU Argon Geochronology Lab |  |         |          |          |            |                   |               |                  |       |                    |                    |                     |   |     |               |       |     |     |              |                        |        |       |      |      |      |        |             |       |         |         |         |            |           |         |    |
|-----------------------------|--|---------|----------|----------|------------|-------------------|---------------|------------------|-------|--------------------|--------------------|---------------------|---|-----|---------------|-------|-----|-----|--------------|------------------------|--------|-------|------|------|------|--------|-------------|-------|---------|---------|---------|------------|-----------|---------|----|
| Sample Parameters           |  | Sample  | Material | Location | Analyst    | Temp              | Standard Name | Standard (in Ma) | %1σ   | Standard Reference | Standard 40Ar/39Ar | %1σ                 | J | %1σ | Air 40Ar/36Ar | %1σ   | MDF | %1σ | Volume Ratio | Sensitivity (mol/volt) | Day    | Month | Year | Hour | Min  | Resist | Irradiation | X-pos | Y-pos   | Z/H-pos | Project | Experiment | Nmb       |         |    |
|                             |  | 13C2021 | 500 °C   | 177-1    | Groundmass | Kerguelen Plateau | Trevor Smith  | 500              | FCT-3 | 28.201             | 0.083              | Kuiper et al., 2008 |   |     | 0.00161369    | 0.251 |     |     | 1.0092       | 0.001                  | 0.9981 | 2E-13 | 19   | JUL  | 2013 | 14     | 9           | 1     | OSU2C13 | 0.00    | 0.00    | 31.80      | Kerguelen | 13C2021 | 01 |
|                             |  | 13C2023 | 600 °C   | 177-1    | Groundmass | Kerguelen Plateau | Trevor Smith  | 600              | FCT-3 | 28.201             | 0.083              | Kuiper et al., 2008 |   |     | 0.00161369    | 0.251 |     |     | 1.0092       | 0.001                  | 0.9981 | 2E-13 | 19   | JUL  | 2013 | 15     | 2           | 1     | OSU2C13 | 0.00    | 0.00    | 31.80      | Kerguelen | 13C2021 | 01 |
|                             |  | 13C2024 | 700 °C   | 177-1    | Groundmass | Kerguelen Plateau | Trevor Smith  | 700              | FCT-3 | 28.201             | 0.083              | Kuiper et al., 2008 |   |     | 0.00161369    | 0.251 |     |     | 1.0092       | 0.001                  | 0.9982 | 2E-13 | 19   | JUL  | 2013 | 15     | 28          | 1     | OSU2C13 | 0.00    | 0.00    | 31.80      | Kerguelen | 13C2021 | 01 |
|                             |  | 13C2026 | 800 °C   | 177-1    | Groundmass | Kerguelen Plateau | Trevor Smith  | 800              | FCT-3 | 28.201             | 0.083              | Kuiper et al., 2008 |   |     | 0.00161369    | 0.251 |     |     | 1.0092       | 0.001                  | 0.9982 | 2E-13 | 19   | JUL  | 2013 | 16     | 19          | 1     | OSU2C13 | 0.00    | 0.00    | 31.80      | Kerguelen | 13C2021 | 01 |
|                             |  | 13C2027 | 900 °C   | 177-1    | Groundmass | Kerguelen Plateau | Trevor Smith  | 900              | FCT-3 | 28.201             | 0.083              | Kuiper et al., 2008 |   |     | 0.00161369    | 0.251 |     |     | 1.0092       | 0.001                  | 0.9981 | 2E-13 | 19   | JUL  | 2013 | 16     | 44          | 1     | OSU2C13 | 0.00    | 0.00    | 31.80      | Kerguelen | 13C2021 | 01 |
|                             |  | 13C2029 | 1050 °C  | 177-1    | Groundmass | Kerguelen Plateau | Trevor Smith  | 1050             | FCT-3 | 28.201             | 0.083              | Kuiper et al., 2008 |   |     | 0.00161369    | 0.251 |     |     | 1.0092       | 0.001                  | 0.9982 | 2E-13 | 19   | JUL  | 2013 | 17     | 38          | 1     | OSU2C13 | 0.00    | 0.00    | 31.80      | Kerguelen | 13C2021 | 01 |
|                             |  | 13C2030 | 1250 °C  | 177-1    | Groundmass | Kerguelen Plateau | Trevor Smith  | 1250             | FCT-3 | 28.201             | 0.083              | Kuiper et al., 2008 |   |     | 0.00161369    | 0.251 |     |     | 1.0092       | 0.001                  | 0.9982 | 2E-13 | 19   | JUL  | 2013 | 18     | 9           | 1     | OSU2C13 | 0.00    | 0.00    | 31.80      | Kerguelen | 13C2021 | 01 |
|                             |  | 13C2032 | 1400 °C  | 177-1    | Groundmass | Kerguelen Plateau | Trevor Smith  | 1400             | FCT-3 | 28.201             | 0.083              | Kuiper et al., 2008 |   |     | 0.00161369    | 0.251 |     |     | 1.0092       | 0.001                  | 0.9981 | 2E-13 | 19   | JUL  | 2013 | 19     | 3           | 1     | OSU2C13 | 0.00    | 0.00    | 31.80      | Kerguelen | 13C2021 | 01 |
|                             |  |         |          |          |            |                   |               |                  |       |                    |                    |                     |   |     |               |       |     |     |              |                        |        |       |      |      |      |        |             |       |         |         |         |            |           |         |    |



|                          |         | OSU Argon Geochronology Lab |       |          |       |          |        |          |       |           |          |           |          |           |          |          |         |          |         |           |     |      |      |      |     |       |     |   |
|--------------------------|---------|-----------------------------|-------|----------|-------|----------|--------|----------|-------|-----------|----------|-----------|----------|-----------|----------|----------|---------|----------|---------|-----------|-----|------|------|------|-----|-------|-----|---|
| Irradiation<br>Constants |         | 40/36(a)                    | %1σ   | 40/36(c) | %1σ   | 38/36(a) | %1σ    | 38/36(c) | %1σ   | 39/37(ca) | %1σ      | 38/37(ca) | %1σ      | 36/37(ca) | %1σ      | 40/39(k) | %1σ     | 38/39(k) | %1σ     | 36/38(cl) | %1σ | K/Ca | %1σ  | K/Cl | %1σ | Ca/Cl | %1σ |   |
|                          | 13C2021 | 500 °C                      | 295.5 | 0        | 0.018 | 35       | 0.1869 | 0        | 1.493 | 3         | 0.000673 | 0         | 0.000139 | 0         | 0.000264 | 0        | 0.00101 | 0        | 0.01138 | 0         | 0   | 0    | 0.43 | 0    | 0   | 0     | 0   | 0 |
|                          | 13C2023 | 600 °C                      | 295.5 | 0        | 0.018 | 35       | 0.1869 | 0        | 1.493 | 3         | 0.000673 | 0         | 0.000139 | 0         | 0.000264 | 0        | 0.00101 | 0        | 0.01138 | 0         | 0   | 0    | 0.43 | 0    | 0   | 0     | 0   | 0 |
|                          | 13C2024 | 700 °C                      | 295.5 | 0        | 0.018 | 35       | 0.1869 | 0        | 1.493 | 3         | 0.000673 | 0         | 0.000139 | 0         | 0.000264 | 0        | 0.00101 | 0        | 0.01138 | 0         | 0   | 0    | 0.43 | 0    | 0   | 0     | 0   | 0 |
|                          | 13C2026 | 800 °C                      | 295.5 | 0        | 0.018 | 35       | 0.1869 | 0        | 1.493 | 3         | 0.000673 | 0         | 0.000139 | 0         | 0.000264 | 0        | 0.00101 | 0        | 0.01138 | 0         | 0   | 0    | 0.43 | 0    | 0   | 0     | 0   | 0 |
|                          | 13C2027 | 900 °C                      | 295.5 | 0        | 0.018 | 35       | 0.1869 | 0        | 1.493 | 3         | 0.000673 | 0         | 0.000139 | 0         | 0.000264 | 0        | 0.00101 | 0        | 0.01138 | 0         | 0   | 0    | 0.43 | 0    | 0   | 0     | 0   | 0 |
|                          | 13C2029 | 1050 °C                     | 295.5 | 0        | 0.018 | 35       | 0.1869 | 0        | 1.493 | 3         | 0.000673 | 0         | 0.000139 | 0         | 0.000264 | 0        | 0.00101 | 0        | 0.01138 | 0         | 0   | 0    | 0.43 | 0    | 0   | 0     | 0   | 0 |
|                          | 13C2030 | 1250 °C                     | 295.5 | 0        | 0.018 | 35       | 0.1869 | 0        | 1.493 | 3         | 0.000673 | 0         | 0.000139 | 0         | 0.000264 | 0        | 0.00101 | 0        | 0.01138 | 0         | 0   | 0    | 0.43 | 0    | 0   | 0     | 0   | 0 |
|                          | 13C2032 | 1400 °C                     | 295.5 | 0        | 0.018 | 35       | 0.1869 | 0        | 1.493 | 3         | 0.000673 | 0         | 0.000139 | 0         | 0.000264 | 0        | 0.00101 | 0        | 0.01138 | 0         | 0   | 0    | 0.43 | 0    | 0   | 0     | 0   | 0 |
|                          |         |                             |       |          |       |          |        |          |       |           |          |           |          |           |          |          |         |          |         |           |     |      |      |      |     |       |     |   |



13C2021.AGE >>> 177-1 >>> KERGUELEN PROJECT

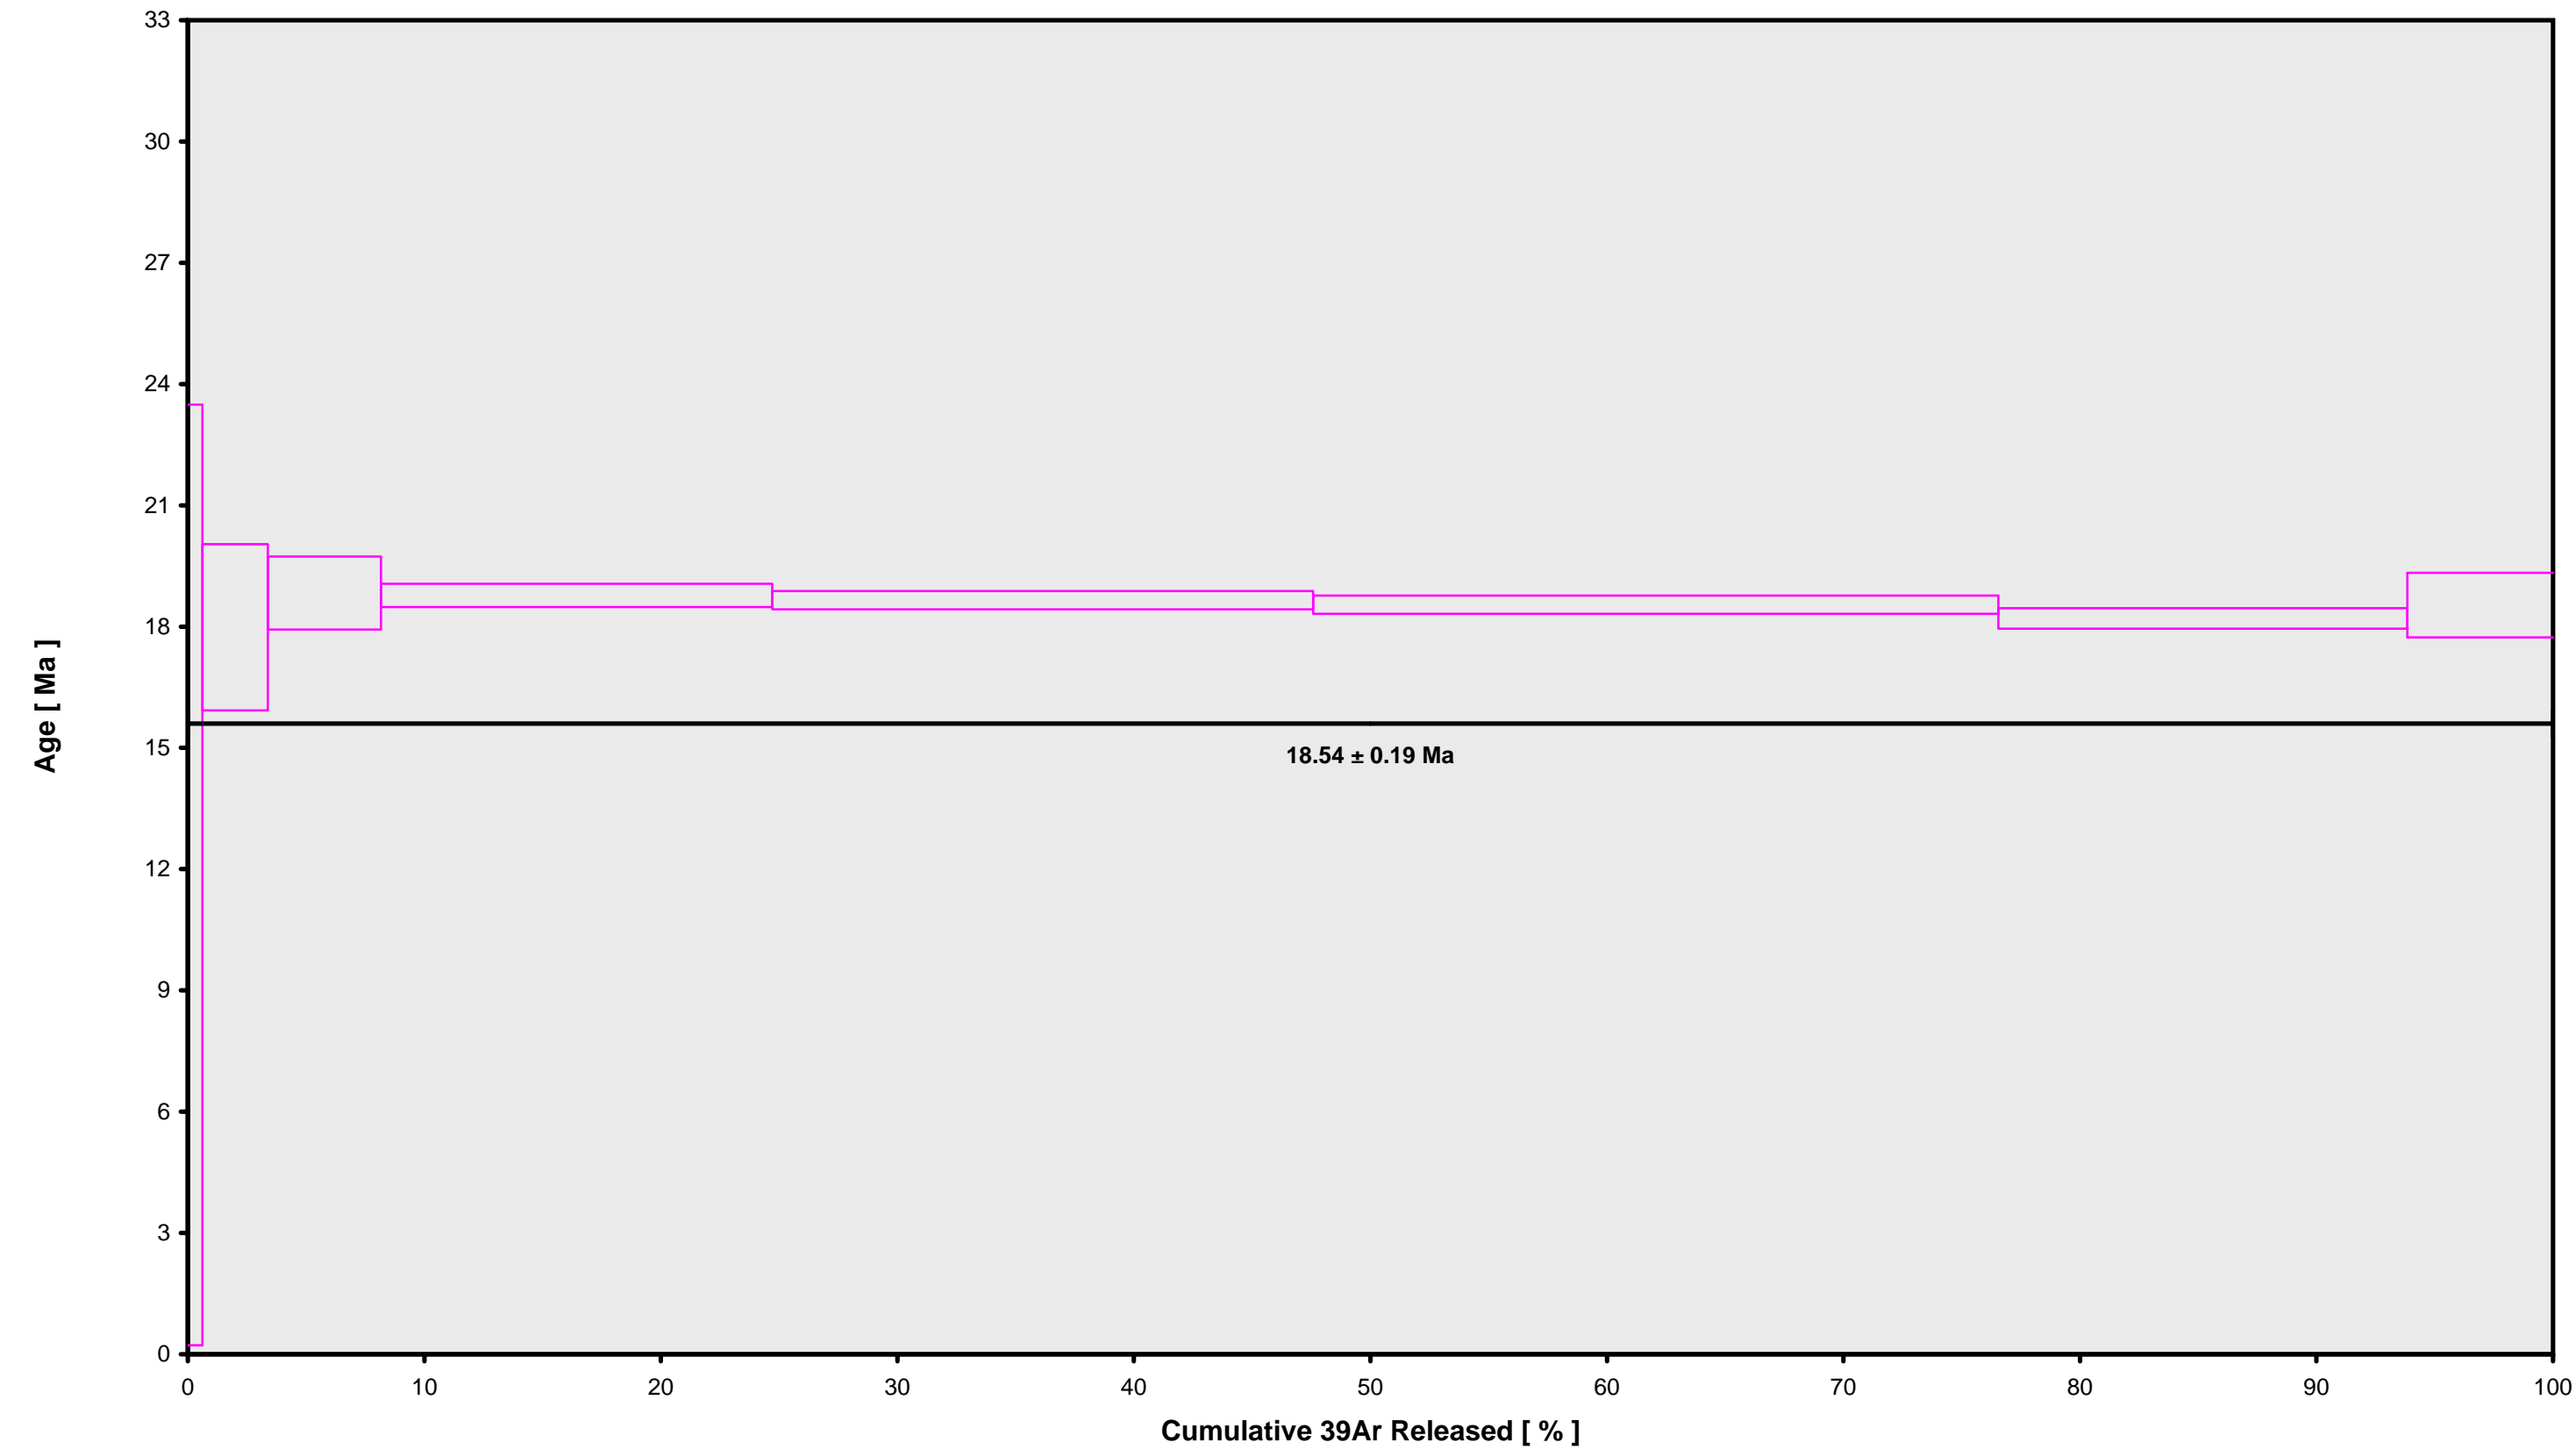

Ar-Ages in Ma

WEIGHTED PLATEAU

$18.54 \pm 0.19$

TOTAL FUSION

$18.50 \pm 0.18$

NORMAL ISOCHRON

$18.46 \pm 0.24$

INVERSE ISOCHRON

$18.51 \pm 0.23$

MSWD (PROBABILITY)

1.84 (7%)

Sample Info

Groundmass

Kerguelen Plateau

Trevor Smith

IRR = OSU2C13

J =  $0.00161369 \pm 0.00000405$

RECALIBRATED AGE



13C2021.AGE >>> 177-1 >>> KERGUELEN PROJECT

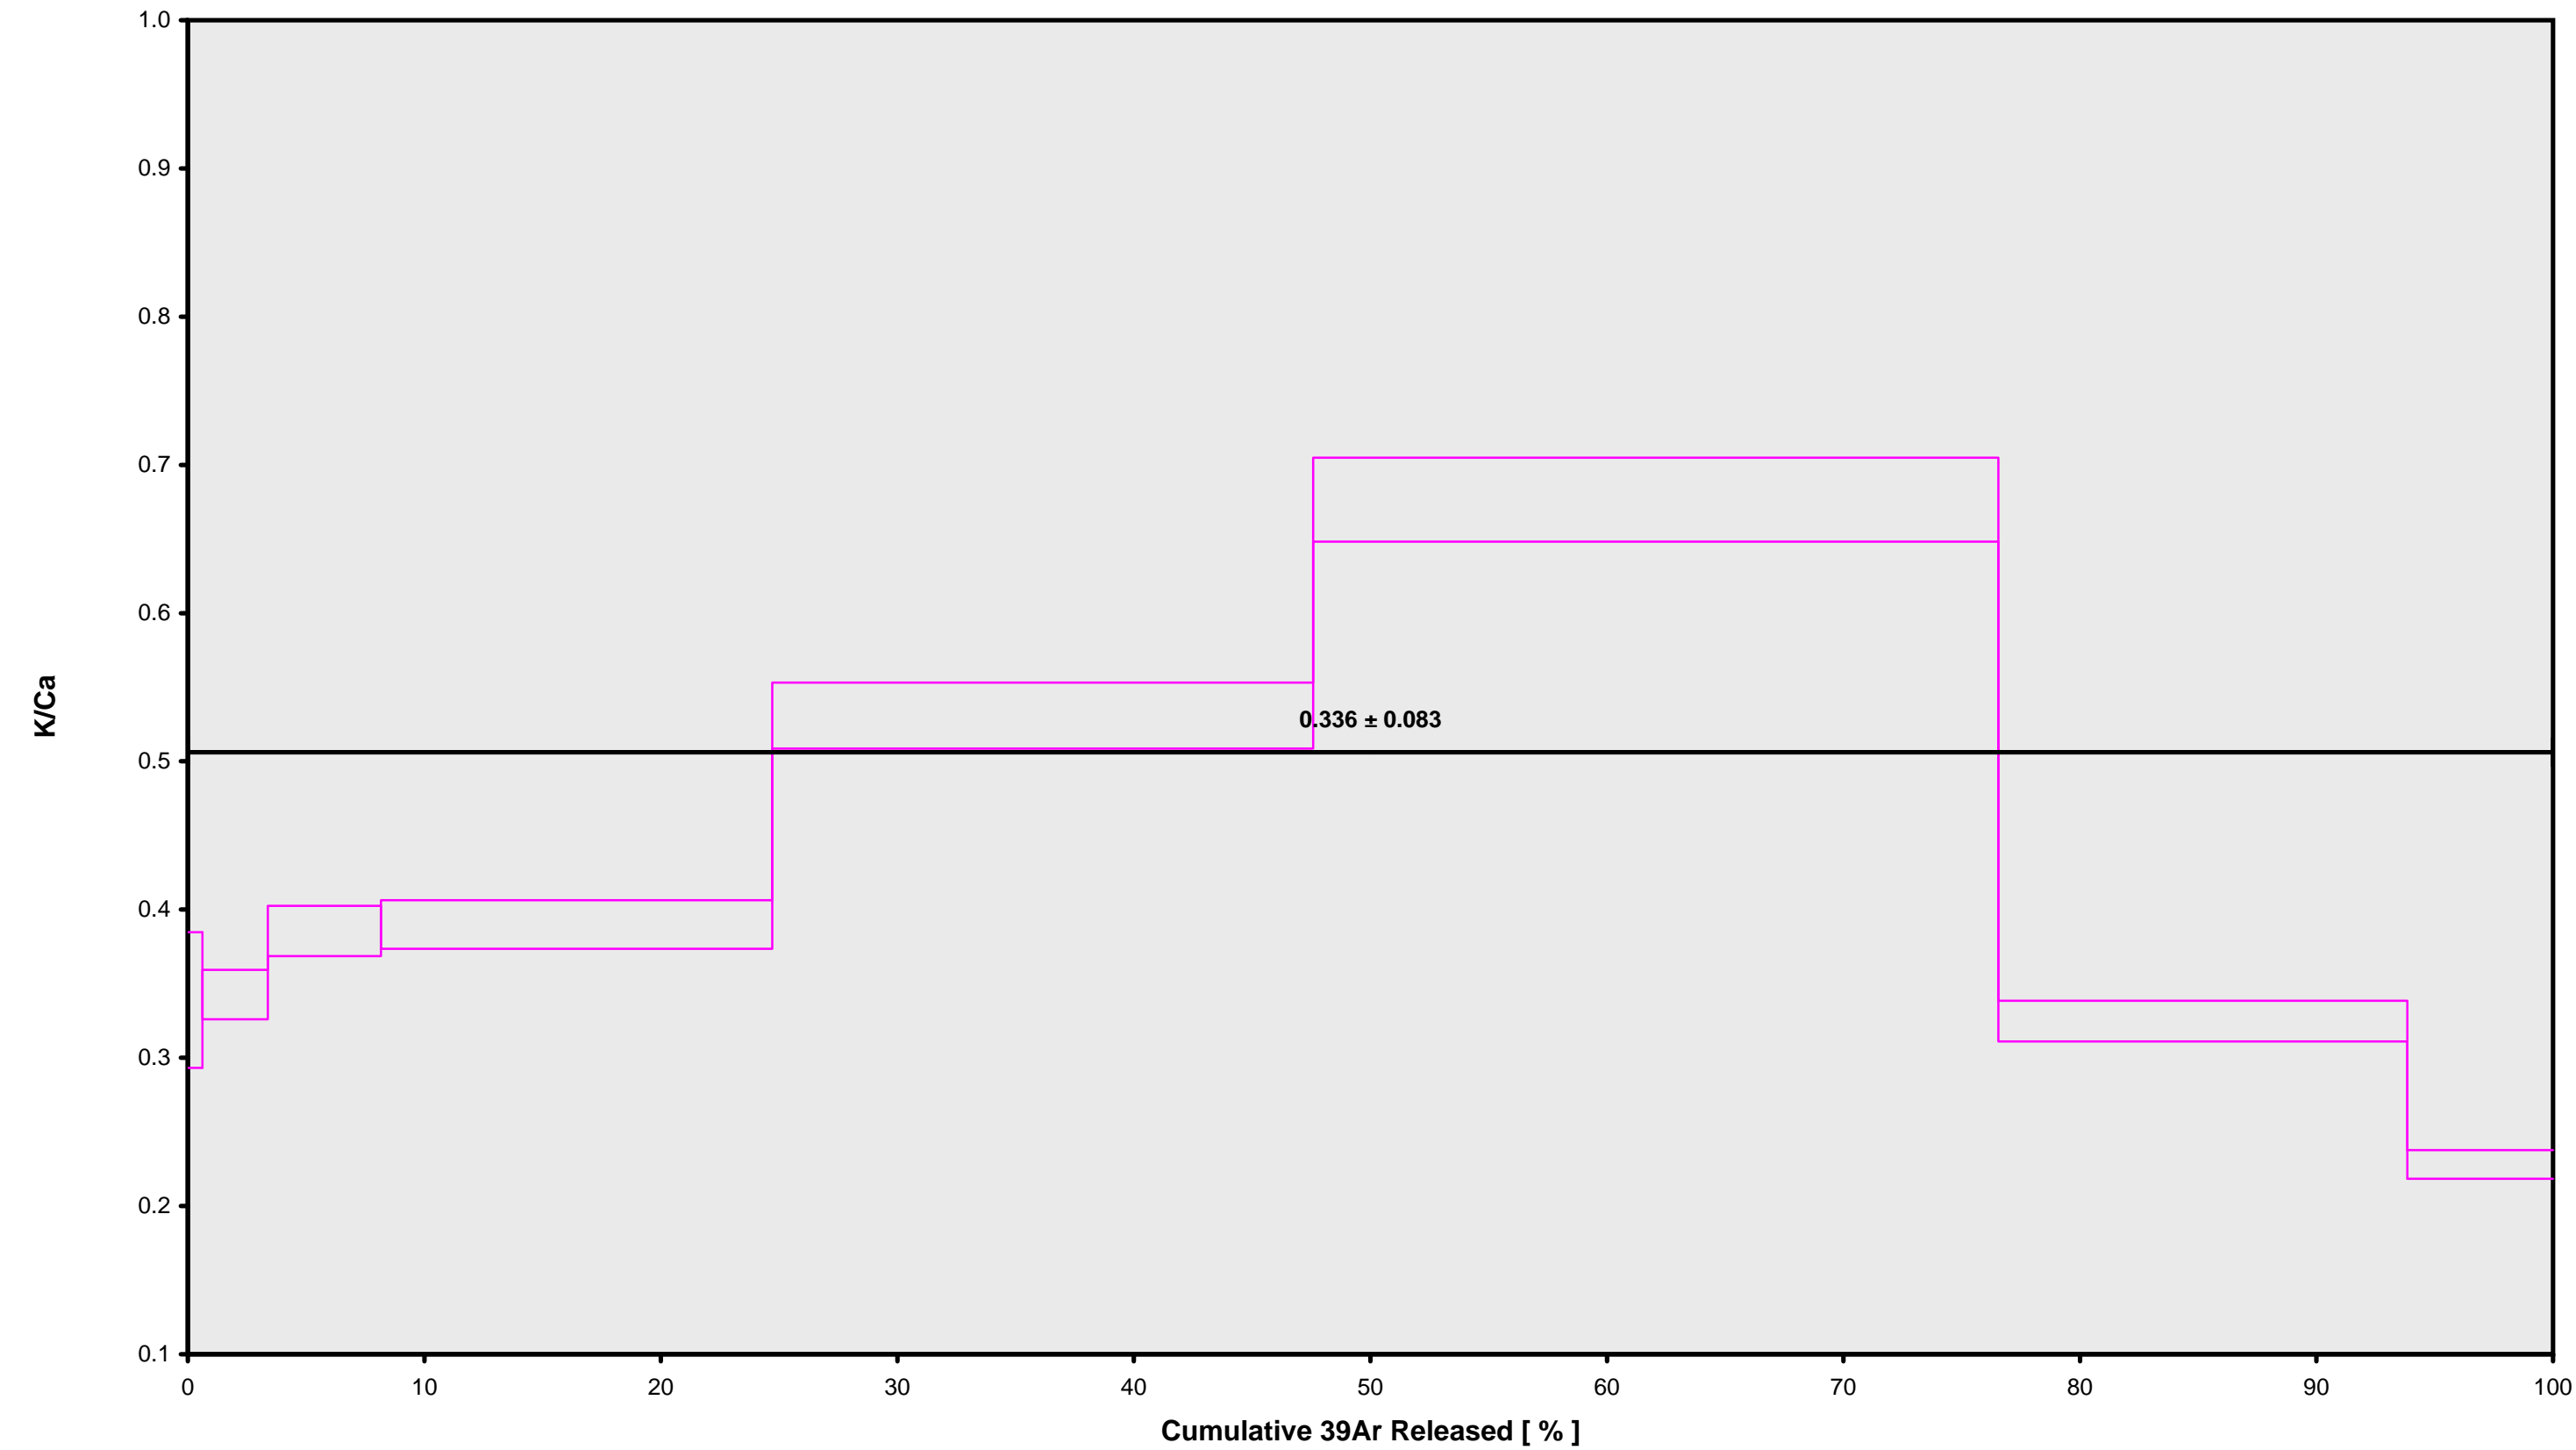

Ar-Ages in Ma

WEIGHTED PLATEAU

$18.54 \pm 0.19$

TOTAL FUSION

$18.50 \pm 0.18$

NORMAL ISOCHRON

$18.46 \pm 0.24$

INVERSE ISOCHRON

$18.51 \pm 0.23$

Sample Info

Groundmass

Kerguelen Plateau

Trevor Smith

IRR = OSU2C13

J =  $0.00161369 \pm 0.00000405$

RECALIBRATED AGE



13C2021.AGE >>> 177-1 >>> KERGUELEN PROJECT

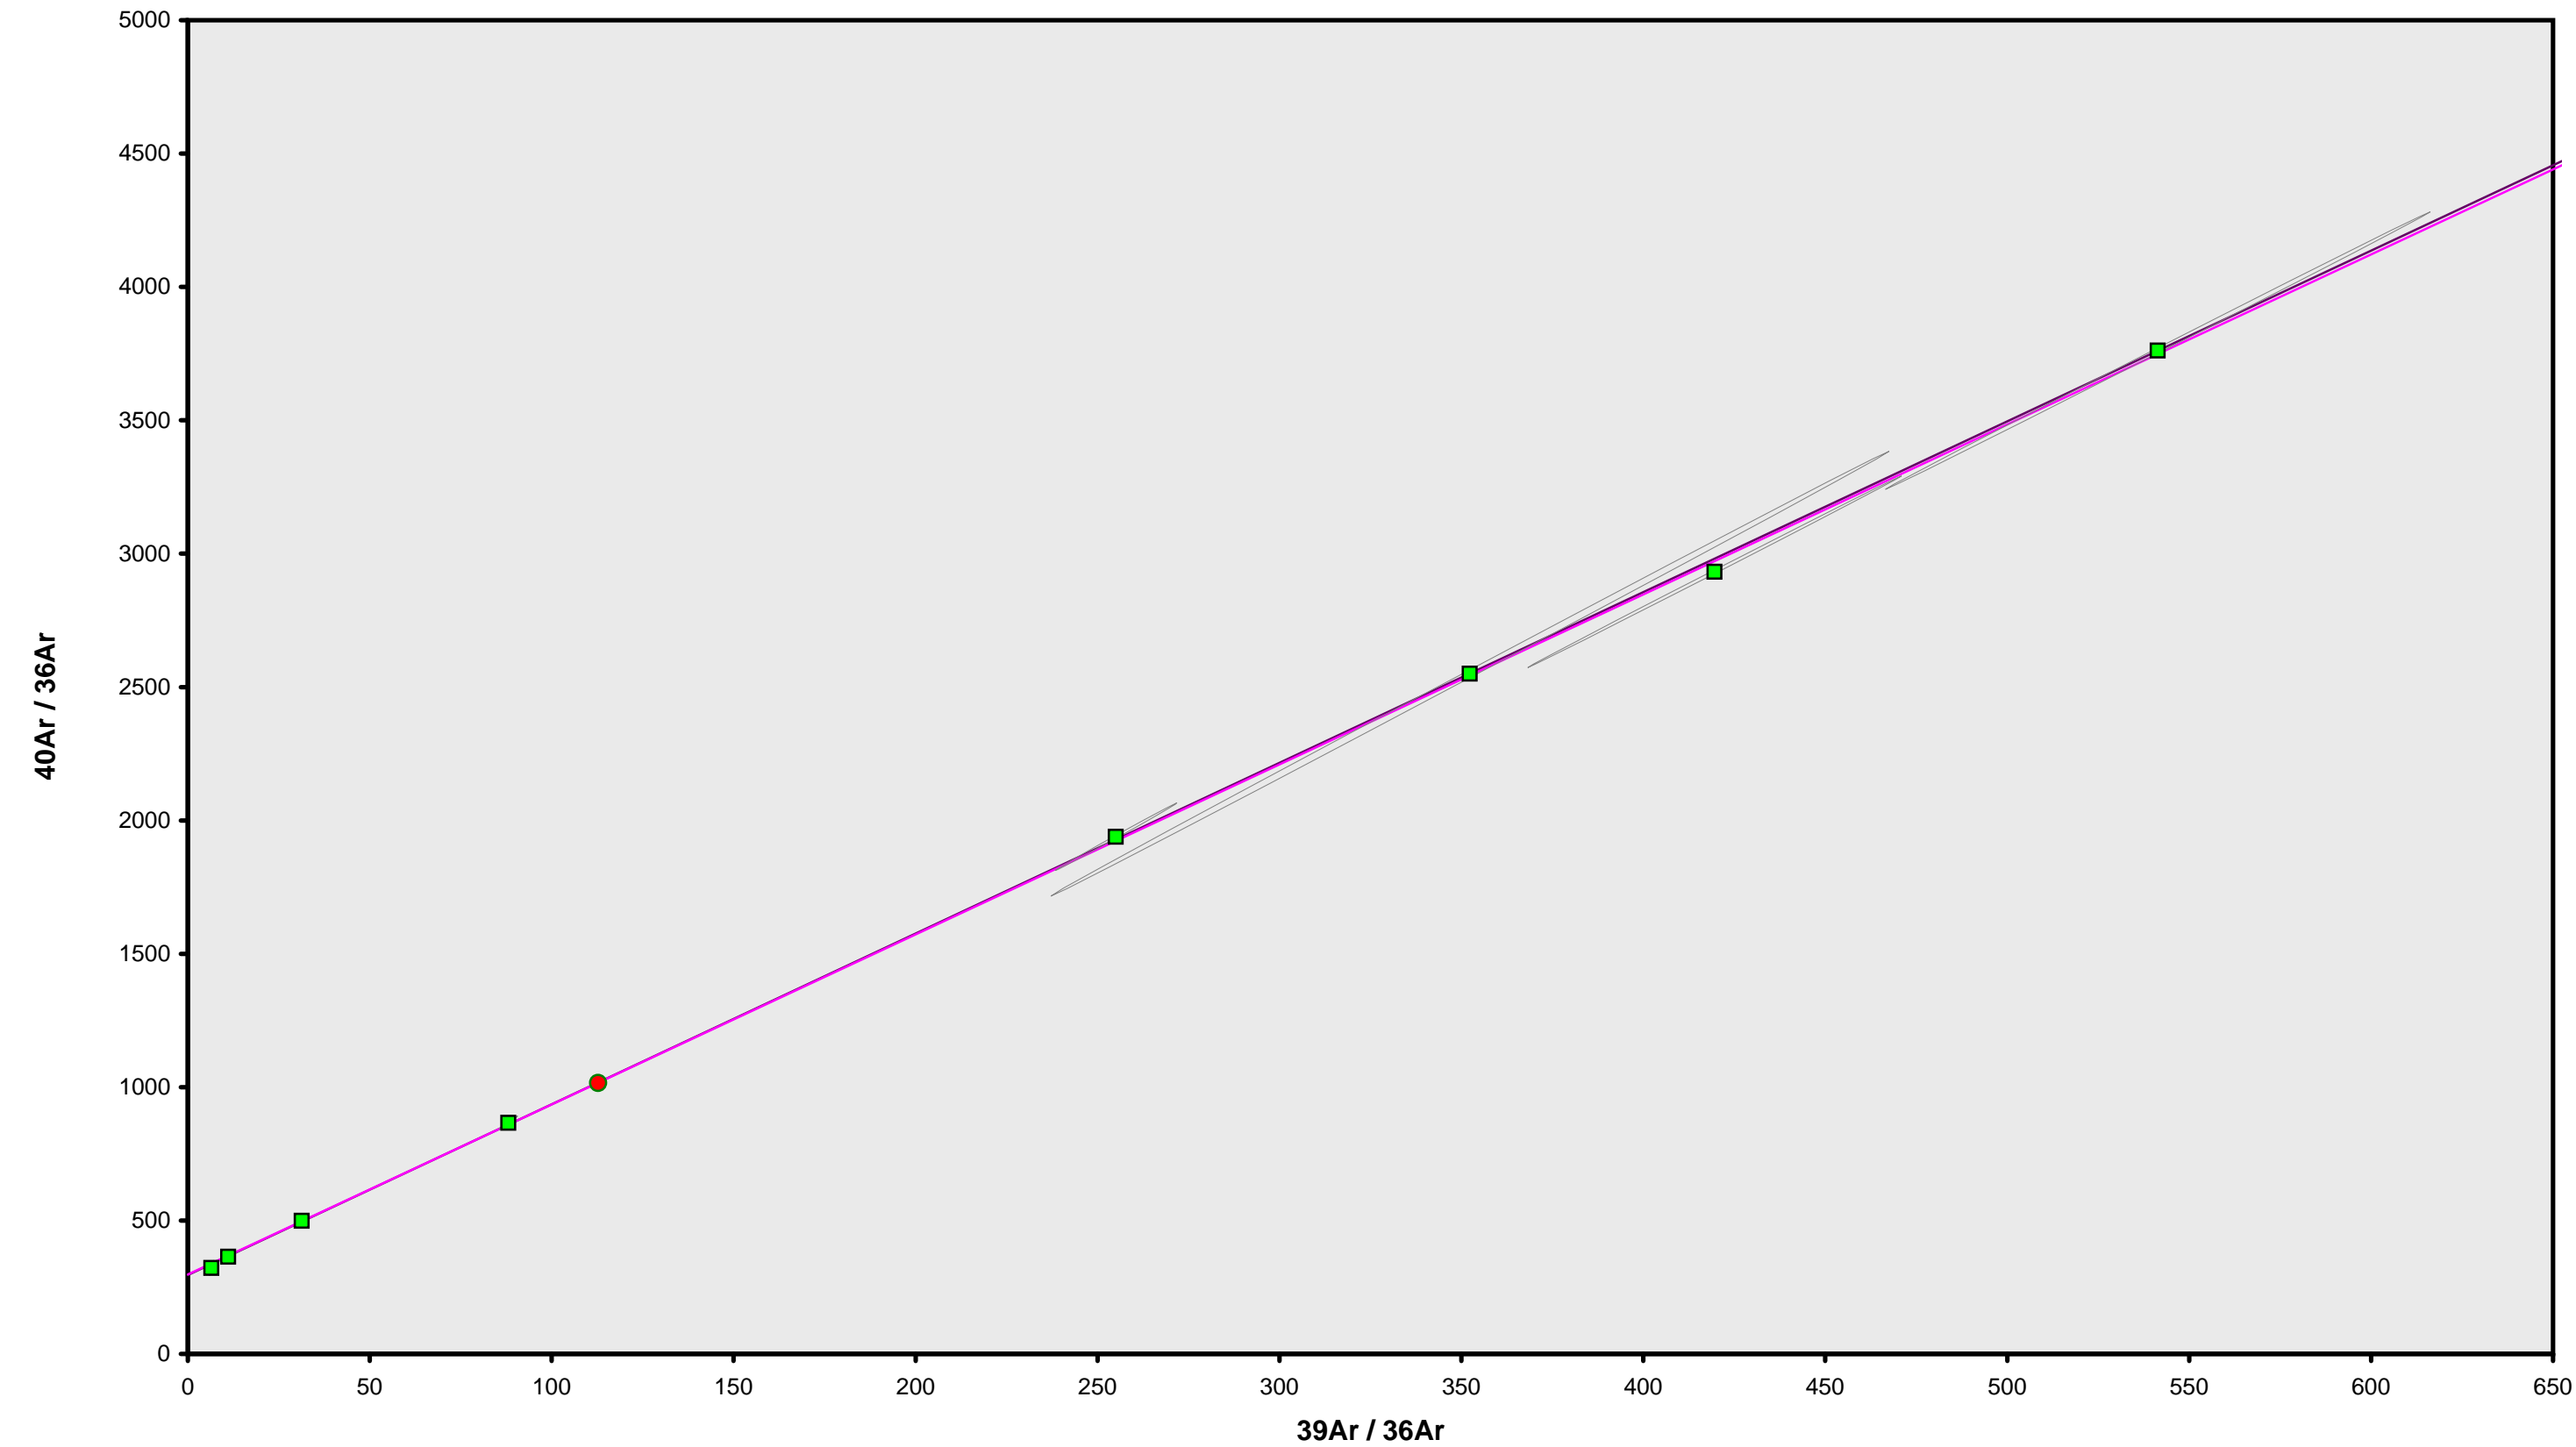

Ar-Ages in Ma

WEIGHTED PLATEAU

18.54 ± 0.19

TOTAL FUSION

18.50 ± 0.18

NORMAL ISOCHRON

18.46 ± 0.24

INVERSE ISOCHRON

18.51 ± 0.23

MSWD (PROBABILITY)

2.37 (3%)

40AR/36AR INTERCEPT

298.1 ± 8.9

Sample Info

Groundmass

Kerguelen Plateau

Trevor Smith

IRR = OSU2C13

J = 0.00161369 ± 0.00000405

RECALIBRATED AGE



13C2021.AGE >>> 177-1 >>> KERGUELEN PROJECT

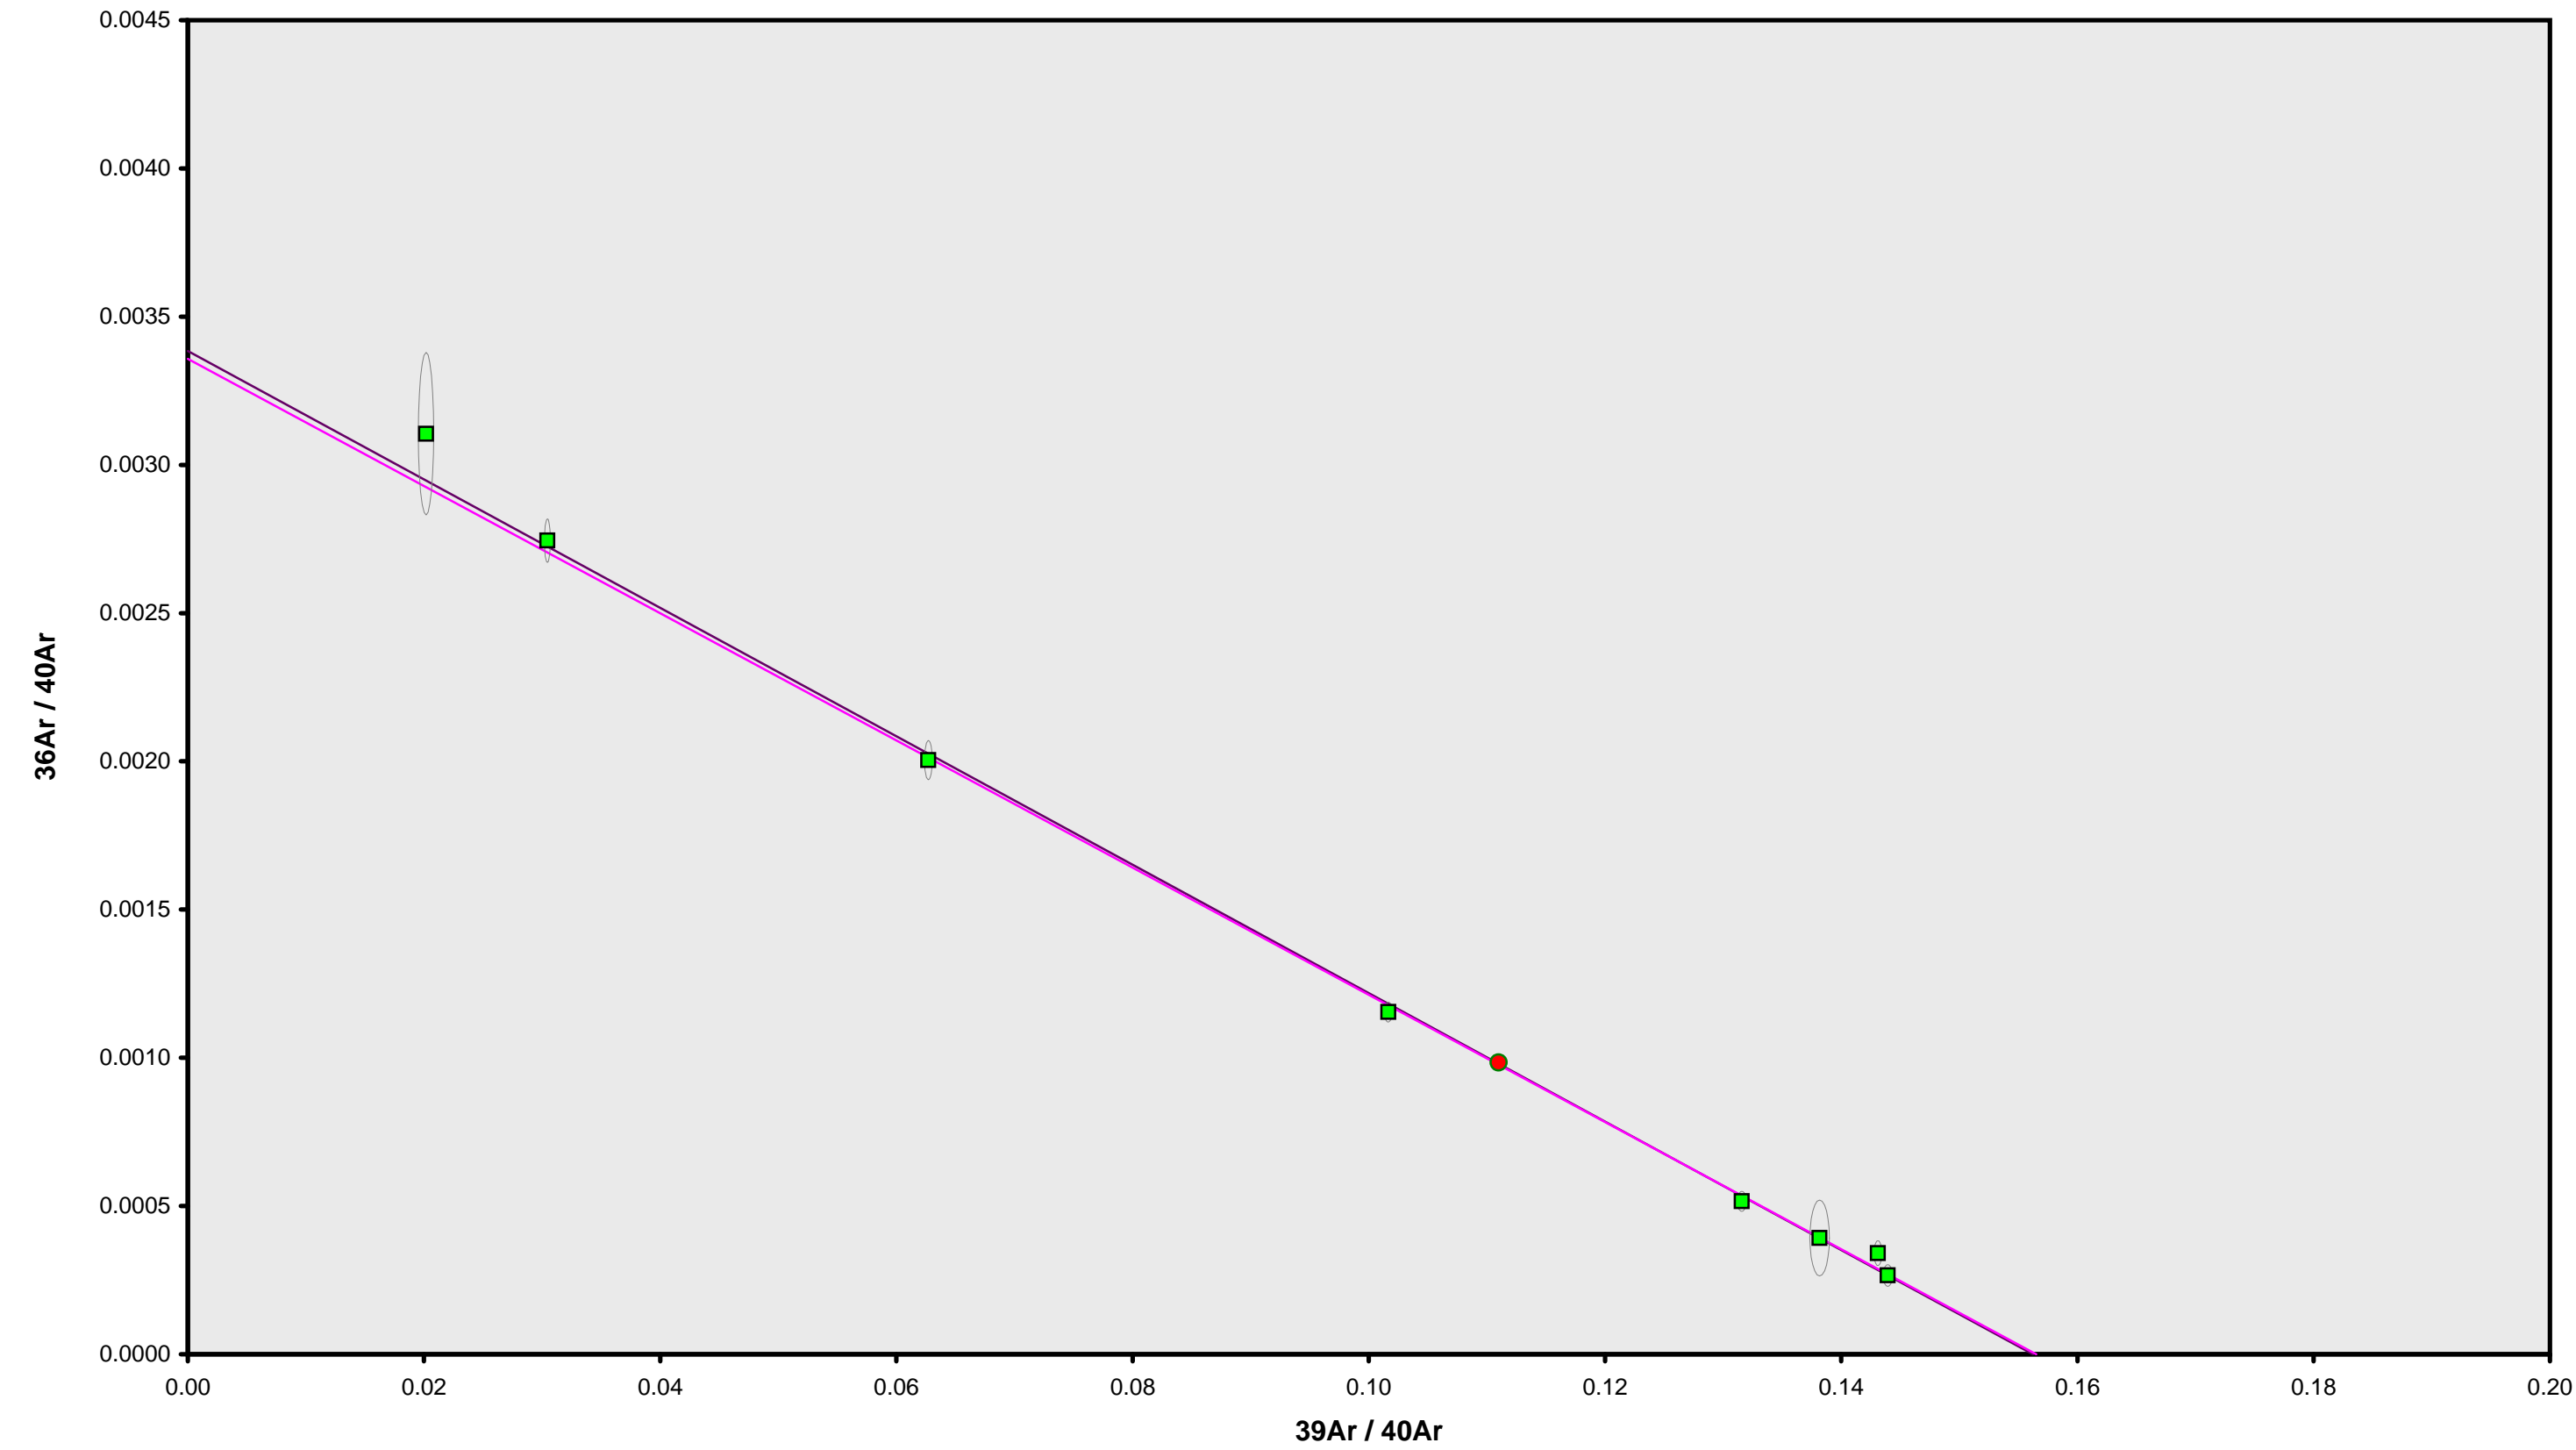

Ar-Ages in Ma

WEIGHTED PLATEAU

18.54 ± 0.19

TOTAL FUSION

18.50 ± 0.18

NORMAL ISOCHRON

18.46 ± 0.24

INVERSE ISOCHRON

18.51 ± 0.23

MSWD (PROBABILITY)

2.05 (6%)

SPREADING FACTOR

79.1%

40AR/36AR INTERCEPT

297.8 ± 8.3

Sample Info

Groundmass

Kerguelen Plateau

Trevor Smith

IRR = OSU2C13

J = 0.00161369 ± 0.00000405

RECALIBRATED AGE



| Incremental Heating |           | 36Ar(a)<br>[V] | 37Ar(ca)<br>[V] | 38Ar(cl)<br>[V] | 39Ar(k)<br>[V] | 40Ar(r)<br>[V] | Age ± 2σ<br>(Ma) | 40Ar(r)<br>(%) | 39Ar(k)<br>(%) | K/Ca ± 2σ     |
|---------------------|-----------|----------------|-----------------|-----------------|----------------|----------------|------------------|----------------|----------------|---------------|
| 13C1999             | 500 °C    | 0.0099497      | 0.0231764       | 0.0008224       | 0.0321764      | 0.0376584      | 3.45 ± 0.78      | 1.26           | 3.65           | 0.597 ± 0.026 |
| 13C2001             | 600 °C    | 0.0209945      | 0.0768963       | 0.0029307       | 0.1248517      | 0.2378955      | 5.62 ± 0.44      | 3.69           | 14.17          | 0.698 ± 0.029 |
| 13C2002             | 700 °C ✓  | 0.0098928      | 0.0714018       | 0.0022974       | 0.1362743      | 0.1097078      | 2.38 ± 0.57      | 3.62           | 15.46          | 0.821 ± 0.034 |
| 13C2004             | 800 °C ✓  | 0.0064884      | 0.0641307       | 0.0015166       | 0.1190757      | 0.0922447      | 2.29 ± 0.42      | 4.59           | 13.51          | 0.798 ± 0.033 |
| 13C2005             | 900 °C ✓  | 0.0039662      | 0.0399959       | 0.0007925       | 0.0674971      | 0.0510403      | 2.23 ± 0.74      | 4.17           | 7.66           | 0.726 ± 0.030 |
| 13C2007             | 1050 °C ✓ | 0.0100760      | 0.1117478       | 0.0012583       | 0.1064999      | 0.0730703      | 2.03 ± 0.43      | 2.40           | 12.08          | 0.410 ± 0.017 |
| 13C2008             | 1250 °C ✓ | 0.0260876      | 0.4533545       | 0.0030850       | 0.2305593      | 0.2217718      | 2.84 ± 0.46      | 2.80           | 26.16          | 0.219 ± 0.009 |
| 13C2010             | 1400 °C ✓ | 0.0060214      | 0.1953757       | 0.0007330       | 0.0643296      | 0.0608319      | 2.79 ± 0.59      | 3.31           | 7.30           | 0.142 ± 0.006 |
| Σ                   |           | 0.0934765      | 1.0360792       | 0.0134358       | 0.8812640      | 0.8842207      |                  |                |                |               |

| Information on Analysis                                                                                                                                                                                                                        | Results          | 40(r)/39(k) ± 2σ  | Age ± 2σ<br>(Ma)           | MSWD   | 39Ar(k)<br>(%,n)    | K/Ca ± 2σ     |
|------------------------------------------------------------------------------------------------------------------------------------------------------------------------------------------------------------------------------------------------|------------------|-------------------|----------------------------|--------|---------------------|---------------|
| Sample = 156-3<br>Material = Groundmass<br>Location = Kerguelen Plateau<br>Analyst = Trevor Smith<br>Project = KERGUELEN<br>Mass Discrimination Law = LIN<br>Irradiation = OSU2C13<br>J = 0.00163701 ± 0.00000405<br>FCT-3 = 28.201 ± 0.023 Ma | Age Plateau      | 0.81596 ± 0.09331 | 2.41 ± 0.28                | 1.77   | 82.18               | 0.219 ± 0.142 |
|                                                                                                                                                                                                                                                | Recalibrated     | ± 11.44%          | ± 11.44%                   | 11%    | 6                   |               |
|                                                                                                                                                                                                                                                |                  |                   | Full External Error ± 0.28 | 2.26   | 2σ Confidence Limit |               |
|                                                                                                                                                                                                                                                |                  |                   | Analytical Error ± 0.28    | 1.3320 | Error Magnification |               |
|                                                                                                                                                                                                                                                | Total Fusion Age | 1.00336 ± 0.06598 | 2.96 ± 0.20                |        | 8                   | 0.366 ± 0.008 |
|                                                                                                                                                                                                                                                | Recalibrated     | ± 6.58%           | ± 6.59%                    |        |                     |               |
|                                                                                                                                                                                                                                                |                  |                   | Full External Error ± 0.21 |        |                     |               |
|                                                                                                                                                                                                                                                |                  |                   | Analytical Error ± 0.19    |        |                     |               |



| Normal Isochron |         | 39(k)/36(a) ± 2σ |              | 40(a+r)/36(a) ± 2σ | r.i.   |
|-----------------|---------|------------------|--------------|--------------------|--------|
| 13C1999         | 500 °C  |                  | 3.23 ± 0.02  | 299.28 ± 0.86      | 0.5790 |
| 13C2001         | 600 °C  |                  | 5.95 ± 0.02  | 306.83 ± 0.91      | 0.8482 |
| 13C2002         | 700 °C  | ✓                | 13.78 ± 0.13 | 306.59 ± 2.76      | 0.9716 |
| 13C2004         | 800 °C  | ✓                | 18.35 ± 0.17 | 309.72 ± 2.75      | 0.9538 |
| 13C2005         | 900 °C  | ✓                | 17.02 ± 0.25 | 308.37 ± 4.45      | 0.9801 |
| 13C2007         | 1050 °C | ✓                | 10.57 ± 0.06 | 302.75 ± 1.60      | 0.9088 |
| 13C2008         | 1250 °C | ✓                | 8.84 ± 0.05  | 304.00 ± 1.41      | 0.8611 |
| 13C2010         | 1400 °C | ✓                | 10.68 ± 0.08 | 305.60 ± 2.22      | 0.8865 |

| Results                         | 40(a)/36(a) ± 2σ      |        | 40(r)/39(k) ± 2σ           | Age ± 2σ (Ma)   | MSWD |
|---------------------------------|-----------------------|--------|----------------------------|-----------------|------|
| Normal Isochron<br>Recalibrated | 297.87 ± 4.14         |        | 0.61847 ± 0.35529          | 1.83 ± 1.05     | 1.66 |
|                                 | ± 1.39%               |        | ± 57.45%                   | ± 57.42%        | 16%  |
|                                 |                       |        | Full External Error ± 1.05 |                 |      |
|                                 |                       |        | Analytical Error ± 1.05    |                 |      |
| Statistics                      | 2σ Confidence Limit   | 2.41   | Convergence                | 0.000000001143  |      |
|                                 | Error Magnification   | 1.2893 | Number of Iterations       | 6               |      |
|                                 | Number of Data Points | 6      | Calculated Line            | Weighted York-2 |      |



| Inverse Isochron |         | 39(k)/40(a+r) ± 2σ |                       | 36(a)/40(a+r) ± 2σ      | r.i.   |
|------------------|---------|--------------------|-----------------------|-------------------------|--------|
| 13C1999          | 500 °C  |                    | 0.0108055 ± 0.0000413 | 0.00334130 ± 0.00000965 | 0.0456 |
| 13C2001          | 600 °C  |                    | 0.0193816 ± 0.0000352 | 0.00325912 ± 0.00000970 | 0.0369 |
| 13C2002          | 700 °C  | ✓                  | 0.0449301 ± 0.0000973 | 0.00326169 ± 0.00002942 | 0.0730 |
| 13C2004          | 800 °C  | ✓                  | 0.0592545 ± 0.0001634 | 0.00322876 ± 0.00002863 | 0.0430 |
| 13C2005          | 900 °C  | ✓                  | 0.0551880 ± 0.0001604 | 0.00324287 ± 0.00004677 | 0.0285 |
| 13C2007          | 1050 °C | ✓                  | 0.0349120 ± 0.0000833 | 0.00330303 ± 0.00001740 | 0.0320 |
| 13C2008          | 1250 °C | ✓                  | 0.0290719 ± 0.0000792 | 0.00328946 ± 0.00001527 | 0.0108 |
| 13C2010          | 1400 °C | ✓                  | 0.0349585 ± 0.0001235 | 0.00327222 ± 0.00002378 | 0.1676 |

| Results          | 40(a)/36(a) ± 2σ      |        | 40(r)/39(k) ± 2σ           |  | Age ± 2σ (Ma)   | MSWD |
|------------------|-----------------------|--------|----------------------------|--|-----------------|------|
| Inverse Isochron | 297.89 ± 4.12         |        | 0.61758 ± 0.30528          |  | 1.82 ± 0.90     | 1.65 |
| Clustered Points | ± 1.38%               |        | ± 49.43%                   |  | ± 49.41%        | 16%  |
|                  |                       |        | Full External Error ± 0.90 |  |                 |      |
|                  |                       |        | Analytical Error ± 0.90    |  |                 |      |
| Statistics       | 2σ Confidence Limit   | 2.41   | Convergence                |  | 0.0000000048    |      |
|                  | Error Magnification   | 1.2856 | Number of Iterations       |  | 4               |      |
|                  | Number of Data Points | 6      | Calculated Line            |  | Weighted York-2 |      |
|                  | Spreading Factor      | 1.9%   |                            |  |                 |      |



| OSU Argon Geochronology Lab |         |             |           |             |           |             |           |             |           |             |           |                   |                  |                |                |               |
|-----------------------------|---------|-------------|-----------|-------------|-----------|-------------|-----------|-------------|-----------|-------------|-----------|-------------------|------------------|----------------|----------------|---------------|
| Relative Abundances         |         | 40Ar<br>[V] | 1σ        | 39Ar<br>[V] | 1σ        | 38Ar<br>[V] | 1σ        | 37Ar<br>[V] | 1σ        | 36Ar<br>[V] | 1σ        | 40(r)/39(k) ± 2σ  | Age ± 2σ<br>(Ma) | 40Ar(r)<br>(%) | 39Ar(k)<br>(%) | K/Ca ± 2σ     |
| 13C1999                     | 500 °C  | 2.977817    | 0.0010563 | 0.0321920   | 0.0000605 | 0.0030513   | 0.0000210 | 0.0231764   | 0.0004989 | 0.0099559   | 0.0000139 | 1.17037 ± 0.26410 | 3.45 ± 0.78      | 1.26           | 3.65           | 0.597 ± 0.026 |
| 13C2001                     | 600 °C  | 6.441885    | 0.0014377 | 0.1249035   | 0.0001099 | 0.0082860   | 0.0000347 | 0.0768963   | 0.0015977 | 0.0210153   | 0.0000309 | 1.90542 ± 0.14799 | 5.62 ± 0.44      | 3.69           | 14.17          | 0.698 ± 0.029 |
| 13C2002                     | 700 °C  | 3.033169    | 0.0018104 | 0.1363224   | 0.0001231 | 0.0057071   | 0.0000307 | 0.0714018   | 0.0014605 | 0.0099121   | 0.0000442 | 0.80505 ± 0.19360 | 2.38 ± 0.57      | 3.62           | 15.46          | 0.821 ± 0.034 |
| 13C2004                     | 800 °C  | 2.009685    | 0.0010297 | 0.1191188   | 0.0001524 | 0.0040933   | 0.0000283 | 0.0641307   | 0.0013323 | 0.0065056   | 0.0000286 | 0.77467 ± 0.14288 | 2.29 ± 0.42      | 4.59           | 13.51          | 0.798 ± 0.033 |
| 13C2005                     | 900 °C  | 1.223108    | 0.0006680 | 0.0675240   | 0.0000909 | 0.0023075   | 0.0000311 | 0.0399959   | 0.0008326 | 0.0039769   | 0.0000285 | 0.75619 ± 0.25050 | 2.23 ± 0.74      | 4.17           | 7.66           | 0.726 ± 0.030 |
| 13C2007                     | 1050 °C | 3.050629    | 0.0009667 | 0.1065752   | 0.0001225 | 0.0043690   | 0.0000321 | 0.1117478   | 0.0022907 | 0.0101057   | 0.0000263 | 0.68611 ± 0.14735 | 2.03 ± 0.43      | 2.40           | 12.08          | 0.410 ± 0.017 |
| 13C2008                     | 1250 °C | 7.930896    | 0.0014658 | 0.2308644   | 0.0003109 | 0.0106476   | 0.0000291 | 0.4533545   | 0.0093157 | 0.0262079   | 0.0000603 | 0.96189 ± 0.15524 | 2.84 ± 0.46      | 2.80           | 26.16          | 0.219 ± 0.009 |
| 13C2010                     | 1400 °C | 1.840233    | 0.0019083 | 0.0644611   | 0.0000920 | 0.0026176   | 0.0000201 | 0.1953757   | 0.0040075 | 0.0060732   | 0.0000209 | 0.94563 ± 0.20156 | 2.79 ± 0.59      | 3.31           | 7.30           | 0.142 ± 0.006 |

|   |  |           |           |           |           |           |           |           |           |           |           |  |  |  |  |  |
|---|--|-----------|-----------|-----------|-----------|-----------|-----------|-----------|-----------|-----------|-----------|--|--|--|--|--|
| Σ |  | 28.507422 | 0.0038329 | 0.8819613 | 0.0004272 | 0.0410794 | 0.0000815 | 1.0360792 | 0.0107468 | 0.0937527 | 0.0000975 |  |  |  |  |  |
|---|--|-----------|-----------|-----------|-----------|-----------|-----------|-----------|-----------|-----------|-----------|--|--|--|--|--|

| Information on Analysis and Constants Used in Calculations |                                                                 | Results          |                  |               |      |               |           |  |
|------------------------------------------------------------|-----------------------------------------------------------------|------------------|------------------|---------------|------|---------------|-----------|--|
|                                                            |                                                                 | 40(a)/36(a) ± 2σ | 40(r)/39(k) ± 2σ | Age ± 2σ (Ma) | MSWD | 39Ar(k) (%.n) | K/Ca ± 2σ |  |
| Sample = 156-3                                             | Age Equations = Min et al. (2000)                               |                  |                  |               |      |               |           |  |
| Material = Groundmass                                      | Negative Intensities = Allowed                                  |                  |                  |               |      |               |           |  |
| Location = Kerguelen Plateau                               | Decay Constant 40K = 5.543 ± 0.044 E-10 1/a                     |                  |                  |               |      |               |           |  |
| Analyst = Trevor Smith                                     | Decay Constant 39Ar = 2.940 ± 0.029 E-07 1/h                    |                  |                  |               |      |               |           |  |
| Project = KERGUELEN                                        | Decay Constant 37Ar = 8.230 ± 0.082 E-04 1/h                    |                  |                  |               |      |               |           |  |
| Mass Discrimination Law = LIN                              | Decay Constant 36Cl = 2.236 ± 0.045 E-06 1/a                    |                  |                  |               |      |               |           |  |
| Irradiation = OSU2C13                                      | Decay Constant 40K(EC,β <sup>+</sup> ) = 0.580 ± 0.009 E-10 1/a |                  |                  |               |      |               |           |  |
| J = 0.00163701 ± 0.00000405                                | Decay Constant 40K(β <sup>-</sup> ) = 4.950 ± 0.043 E-10 1/a    |                  |                  |               |      |               |           |  |
| FCT-3 = 28.201 ± 0.023 Ma                                  | Atmospheric Ratio 40/36(a) = 295.50                             |                  |                  |               |      |               |           |  |
| IGSN = Undefined                                           | Atmospheric Ratio 38/36(a) = 0.1869                             |                  |                  |               |      |               |           |  |
| Preferred Age = Undefined                                  | Production Ratio 39/37(ca) = 0.000673                           |                  |                  |               |      |               |           |  |
| Classification = Undefined                                 | Production Ratio 38/37(ca) = 0.000139                           |                  |                  |               |      |               |           |  |
| Experiment Type = Undefined                                | Production Ratio 36/37(ca) = 0.000264                           |                  |                  |               |      |               |           |  |
| Extraction Method = Undefined                              | Production Ratio 40/39(k) = 0.001010                            |                  |                  |               |      |               |           |  |
| Heating = 0 sec                                            | Production Ratio 38/39(k) = 0.011380                            |                  |                  |               |      |               |           |  |
| Isolation = 15.00 min                                      | Production Ratio 36/38(cl) = 316.00 ± 15.80                     |                  |                  |               |      |               |           |  |
| Instrument = MAP215-50                                     | Scaling Ratio K/Ca = 0.430                                      |                  |                  |               |      |               |           |  |
| Lithology = Undefined                                      | Abundance Ratio 40K/K = 1.1700 ± 0.0199 E-04                    |                  |                  |               |      |               |           |  |
| Lat-Lon = Undefined - Undefined                            | Atomic Weight K = 39.0983 ± 0.0001 g                            |                  |                  |               |      |               |           |  |
| R1 ratio = Undefined                                       | Recalibrated to FCT-3 Secondary Standard                        |                  |                  |               |      |               |           |  |
| R2 ratio = Undefined                                       | Standard Age = 28.201 ± 0.023 Ma                                |                  |                  |               |      |               |           |  |
| R3 ratio = Undefined                                       |                                                                 |                  |                  |               |      |               |           |  |
| R4 ratio = Undefined                                       |                                                                 |                  |                  |               |      |               |           |  |
| R5 ratio = Undefined                                       |                                                                 |                  |                  |               |      |               |           |  |
| Collector Calibrations =                                   |                                                                 |                  |                  |               |      |               |           |  |
|                                                            |                                                                 |                  |                  |               |      |               |           |  |
|                                                            |                                                                 |                  |                  |               |      |               |           |  |
|                                                            |                                                                 |                  |                  |               |      |               |           |  |
|                                                            |                                                                 |                  |                  |               |      |               |           |  |
|                                                            |                                                                 |                  |                  |               |      |               |           |  |
|                                                            |                                                                 |                  |                  |               |      |               |           |  |
|                                                            |                                                                 |                  |                  |               |      |               |           |  |
|                                                            |                                                                 |                  |                  |               |      |               |           |  |
|                                                            |                                                                 |                  |                  |               |      |               |           |  |
|                                                            |                                                                 |                  |                  |               |      |               |           |  |
|                                                            |                                                                 |                  |                  |               |      |               |           |  |
|                                                            |                                                                 |                  |                  |               |      |               |           |  |
|                                                            |                                                                 |                  |                  |               |      |               |           |  |
|                                                            |                                                                 |                  |                  |               |      |               |           |  |
|                                                            |                                                                 |                  |                  |               |      |               |           |  |
|                                                            |                                                                 |                  |                  |               |      |               |           |  |
|                                                            |                                                                 |                  |                  |               |      |               |           |  |
|                                                            |                                                                 |                  |                  |               |      |               |           |  |
|                                                            |                                                                 |                  |                  |               |      |               |           |  |
|                                                            |                                                                 |                  |                  |               |      |               |           |  |
|                                                            |                                                                 |                  |                  |               |      |               |           |  |
|                                                            |                                                                 |                  |                  |               |      |               |           |  |
|                                                            |                                                                 |                  |                  |               |      |               |           |  |
|                                                            |                                                                 |                  |                  |               |      |               |           |  |
|                                                            |                                                                 |                  |                  |               |      |               |           |  |
|                                                            |                                                                 |                  |                  |               |      |               |           |  |
|                                                            |                                                                 |                  |                  |               |      |               |           |  |
|                                                            |                                                                 |                  |                  |               |      |               |           |  |
|                                                            |                                                                 |                  |                  |               |      |               |           |  |
|                                                            |                                                                 |                  |                  |               |      |               |           |  |
|                                                            |                                                                 |                  |                  |               |      |               |           |  |
|                                                            |                                                                 |                  |                  |               |      |               |           |  |
|                                                            |                                                                 |                  |                  |               |      |               |           |  |
|                                                            |                                                                 |                  |                  |               |      |               |           |  |
|                                                            |                                                                 |                  |                  |               |      |               |           |  |
|                                                            |                                                                 |                  |                  |               |      |               |           |  |
|                                                            |                                                                 |                  |                  |               |      |               |           |  |
|                                                            |                                                                 |                  |                  |               |      |               |           |  |
|                                                            |                                                                 |                  |                  |               |      |               |           |  |
|                                                            |                                                                 |                  |                  |               |      |               |           |  |
|                                                            |                                                                 |                  |                  |               |      |               |           |  |
|                                                            |                                                                 |                  |                  |               |      |               |           |  |
|                                                            |                                                                 |                  |                  |               |      |               |           |  |
|                                                            |                                                                 |                  |                  |               |      |               |           |  |
|                                                            |                                                                 |                  |                  |               |      |               |           |  |
|                                                            |                                                                 |                  |                  |               |      |               |           |  |
|                                                            |                                                                 |                  |                  |               |      |               |           |  |
|                                                            |                                                                 |                  |                  |               |      |               |           |  |
|                                                            |                                                                 |                  |                  |               |      |               |           |  |
|                                                            |                                                                 |                  |                  |               |      |               |           |  |
|                                                            |                                                                 |                  |                  |               |      |               |           |  |
|                                                            |                                                                 |                  |                  |               |      |               |           |  |
|                                                            |                                                                 |                  |                  |               |      |               |           |  |
|                                                            |                                                                 |                  |                  |               |      |               |           |  |
|                                                            |                                                                 |                  |                  |               |      |               |           |  |
|                                                            |                                                                 |                  |                  |               |      |               |           |  |
|                                                            |                                                                 |                  |                  |               |      |               |           |  |
|                                                            |                                                                 |                  |                  |               |      |               |           |  |
|                                                            |                                                                 |                  |                  |               |      |               |           |  |
|                                                            |                                                                 |                  |                  |               |      |               |           |  |
|                                                            |                                                                 |                  |                  |               |      |               |           |  |
|                                                            |                                                                 |                  |                  |               |      |               |           |  |
|                                                            |                                                                 |                  |                  |               |      |               |           |  |
|                                                            |                                                                 |                  |                  |               |      |               |           |  |
|                                                            |                                                                 |                  |                  |               |      |               |           |  |
|                                                            |                                                                 |                  |                  |               |      |               |           |  |
|                                                            |                                                                 |                  |                  |               |      |               |           |  |
|                                                            |                                                                 |                  |                  |               |      |               |           |  |
|                                                            |                                                                 |                  |                  |               |      |               |           |  |
|                                                            |                                                                 |                  |                  |               |      |               |           |  |
|                                                            |                                                                 |                  |                  |               |      |               |           |  |
|                                                            |                                                                 |                  |                  |               |      |               |           |  |
|                                                            |                                                                 |                  |                  |               |      |               |           |  |
|                                                            |                                                                 |                  |                  |               |      |               |           |  |
|                                                            |                                                                 |                  |                  |               |      |               |           |  |
|                                                            |                                                                 |                  |                  |               |      |               |           |  |
|                                                            |                                                                 |                  |                  |               |      |               |           |  |
|                                                            |                                                                 |                  |                  |               |      |               |           |  |
|                                                            |                                                                 |                  |                  |               |      |               |           |  |
|                                                            |                                                                 |                  |                  |               |      |               |           |  |
|                                                            |                                                                 |                  |                  |               |      |               |           |  |
|                                                            |                                                                 |                  |                  |               |      |               |           |  |
|                                                            |                                                                 |                  |                  |               |      |               |           |  |
|                                                            |                                                                 |                  |                  |               |      |               |           |  |
|                                                            |                                                                 |                  |                  |               |      |               |           |  |
|                                                            |                                                                 |                  |                  |               |      |               |           |  |
|                                                            |                                                                 |                  |                  |               |      |               |           |  |
|                                                            |                                                                 |                  |                  |               |      |               |           |  |
|                                                            |                                                                 |                  |                  |               |      |               |           |  |
|                                                            |                                                                 |                  |                  |               |      |               |           |  |
|                                                            |                                                                 |                  |                  |               |      |               |           |  |
|                                                            |                                                                 |                  |                  |               |      |               |           |  |
|                                                            |                                                                 |                  |                  |               |      |               |           |  |
|                                                            |                                                                 |                  |                  |               |      |               |           |  |
|                                                            |                                                                 |                  |                  |               |      |               |           |  |
|                                                            |                                                                 |                  |                  |               |      |               |           |  |
|                                                            |                                                                 |                  |                  |               |      |               |           |  |
|                                                            |                                                                 |                  |                  |               |      |               |           |  |
|                                                            |                                                                 |                  |                  |               |      |               |           |  |
|                                                            |                                                                 |                  |                  |               |      |               |           |  |
|                                                            |                                                                 |                  |                  |               |      |               |           |  |
|                                                            |                                                                 |                  |                  |               |      |               |           |  |
|                                                            |                                                                 |                  |                  |               |      |               |           |  |
|                                                            |                                                                 |                  |                  |               |      |               |           |  |
|                                                            |                                                                 |                  |                  |               |      |               |           |  |
|                                                            |                                                                 |                  |                  |               |      |               |           |  |
|                                                            |                                                                 |                  |                  |               |      |               |           |  |
|                                                            |                                                                 |                  |                  |               |      |               |           |  |
|                                                            |                                                                 |                  |                  |               |      |               |           |  |
|                                                            |                                                                 |                  |                  |               |      |               |           |  |
|                                                            |                                                                 |                  |                  |               |      |               |           |  |
|                                                            |                                                                 |                  |                  |               |      |               |           |  |
|                                                            |                                                                 |                  |                  |               |      |               |           |  |
|                                                            |                                                                 |                  |                  |               |      |               |           |  |
|                                                            |                                                                 |                  |                  |               |      |               |           |  |



| OSU Argon Geochronology Lab |         |                |             |                |           |                 |           |                 |           |                 |           |                |           |                |           |                |           |                 |           |                 |           |                |           |                 |           |                |           |                |          |                |           |                |           |      |
|-----------------------------|---------|----------------|-------------|----------------|-----------|-----------------|-----------|-----------------|-----------|-----------------|-----------|----------------|-----------|----------------|-----------|----------------|-----------|-----------------|-----------|-----------------|-----------|----------------|-----------|-----------------|-----------|----------------|-----------|----------------|----------|----------------|-----------|----------------|-----------|------|
| Degassing<br>Patterns       |         | 36Ar(a)<br>[V] | %1σ         | 36Ar(c)<br>[V] | %1σ       | 36Ar(ca)<br>[V] | %1σ       | 36Ar(cl)<br>[V] | %1σ       | 37Ar(ca)<br>[V] | %1σ       | 38Ar(a)<br>[V] | %1σ       | 38Ar(c)<br>[V] | %1σ       | 38Ar(k)<br>[V] | %1σ       | 38Ar(ca)<br>[V] | %1σ       | 38Ar(cl)<br>[V] | %1σ       | 39Ar(k)<br>[V] | %1σ       | 39Ar(ca)<br>[V] | %1σ       | 40Ar(r)<br>[V] | %1σ       | 40Ar(a)<br>[V] | %1σ      | 40Ar(c)<br>[V] | %1σ       | 40Ar(k)<br>[V] | %1σ       |      |
|                             | 13C1999 | 500 °C         | 0.0099497   | 0.14           | 0.0000000 | 0.00            | 0.0000061 | 2.15            | 0.0000002 | 5.97            | 0.0231764 | 2.15           | 0.0018596 | 0.14           | 0.0000000 | 0.00           | 0.0003662 | 0.19            | 0.0000032 | 2.15            | 0.0008224 | 8.04           | 0.0321764 | 0.19            | 0.0000156 | 2.15           | 0.0376584 | 11.28          | 2.940126 | 0.14           | 0.0000000 | 0.00           | 0.0000325 | 0.19 |
|                             | 13C2001 | 600 °C         | 0.0209945   | 0.15           | 0.0000000 | 0.00            | 0.0000203 | 2.08            | 0.0000006 | 5.52            | 0.0768963 | 2.08           | 0.0039239 | 0.15           | 0.0000000 | 0.00           | 0.0014208 | 0.09            | 0.0000107 | 2.08            | 0.0029307 | 7.71           | 0.1248517 | 0.09            | 0.0000518 | 2.08           | 0.2378955 | 3.88           | 6.203863 | 0.15           | 0.0000000 | 0.00           | 0.0001261 | 0.09 |
|                             | 13C2002 | 700 °C         | ✓ 0.0098928 | 0.45           | 0.0000000 | 0.00            | 0.0000189 | 2.05            | 0.0000005 | 5.56            | 0.0714018 | 2.05           | 0.0018490 | 0.45           | 0.0000000 | 0.00           | 0.0015508 | 0.09            | 0.0000099 | 2.05            | 0.0022974 | 7.74           | 0.1362743 | 0.09            | 0.0000481 | 2.05           | 0.1097078 | 12.02          | 2.923324 | 0.45           | 0.0000000 | 0.00           | 0.0001376 | 0.09 |
|                             | 13C2004 | 800 °C         | ✓ 0.0064884 | 0.44           | 0.0000000 | 0.00            | 0.0000169 | 2.08            | 0.0000003 | 5.71            | 0.0641307 | 2.08           | 0.0012127 | 0.44           | 0.0000000 | 0.00           | 0.0013551 | 0.13            | 0.0000089 | 2.08            | 0.0015166 | 7.85           | 0.1190757 | 0.13            | 0.0000432 | 2.08           | 0.0922447 | 9.22           | 1.917320 | 0.44           | 0.0000000 | 0.00           | 0.0001203 | 0.13 |
|                             | 13C2005 | 900 °C         | ✓ 0.0039662 | 0.72           | 0.0000000 | 0.00            | 0.0000106 | 2.08            | 0.0000002 | 6.70            | 0.0399959 | 2.08           | 0.0007413 | 0.72           | 0.0000000 | 0.00           | 0.0007681 | 0.13            | 0.0000056 | 2.08            | 0.0007925 | 8.59           | 0.0674971 | 0.13            | 0.0000269 | 2.08           | 0.0510403 | 16.56          | 1.172000 | 0.72           | 0.0000000 | 0.00           | 0.0000682 | 0.13 |
|                             | 13C2007 | 1050 °C        | ✓ 0.0100760 | 0.26           | 0.0000000 | 0.00            | 0.0000295 | 2.05            | 0.0000003 | 5.97            | 0.1117478 | 2.05           | 0.0018832 | 0.26           | 0.0000000 | 0.00           | 0.0012120 | 0.11            | 0.0000155 | 2.05            | 0.0012583 | 8.04           | 0.1064999 | 0.11            | 0.0000752 | 2.05           | 0.0730703 | 10.74          | 2.977451 | 0.26           | 0.0000000 | 0.00           | 0.0001076 | 0.11 |
|                             | 13C2008 | 1250 °C        | ✓ 0.0260876 | 0.23           | 0.0000000 | 0.00            | 0.0001197 | 2.05            | 0.0000006 | 5.48            | 0.4533545 | 2.05           | 0.0048758 | 0.23           | 0.0000000 | 0.00           | 0.0026238 | 0.13            | 0.0000630 | 2.05            | 0.0030850 | 7.68           | 0.2305593 | 0.13            | 0.0003051 | 2.05           | 0.2217718 | 8.07           | 7.708891 | 0.23           | 0.0000000 | 0.00           | 0.0002329 | 0.13 |
|                             | 13C2010 | 1400 °C        | ✓ 0.0060214 | 0.35           | 0.0000000 | 0.00            | 0.0000516 | 2.05            | 0.0000001 | 6.07            | 0.1953757 | 2.05           | 0.0011254 | 0.35           | 0.0000000 | 0.00           | 0.0007321 | 0.14            | 0.0000272 | 2.05            | 0.0007330 | 8.11           | 0.0643296 | 0.14            | 0.0001315 | 2.05           | 0.0608319 | 10.66          | 1.779336 | 0.35           | 0.0000000 | 0.00           | 0.0000650 | 0.14 |
|                             | Σ       | 0.0934765      | 0.10        | 0.0000000      | 0.00      | 0.0002735       | 1.04      | 0.0000027       | 2.25      | 1.0360792       | 1.04      | 0.0174708      | 0.10      | 0.0000000      | 0.00      | 0.0100288      | 0.05      | 0.0001440       | 1.04      | 0.0134358       | 3.12      | 0.8812640      | 0.05      | 0.0006973       | 1.04      | 0.8842207      | 3.29      | 27.622311      | 0.10     | 0.0000000      | 0.00      | 0.0008901      | 0.05      |      |
|                             | Σ       |                |             |                |           |                 |           | 0.0937527       | 0.10      | 1.0360792       | 1.04      |                |           |                |           |                |           |                 |           | 0.0410794       | 1.02      |                |           | 0.8819613       | 0.05      |                |           |                |          |                |           | 28.507422      | 0.14      |      |



| Additional Parameters |           | 40Ar/39Ar | 1σ       | 37Ar/39Ar | 1σ       | 36Ar/39Ar | 1σ       | Time (days) | 37Ar (decay) | 39Ar (decay) | 40Ar (moles) |
|-----------------------|-----------|-----------|----------|-----------|----------|-----------|----------|-------------|--------------|--------------|--------------|
| 13C1999               | 500 °C    | 92.501749 | 0.176826 | 0.719943  | 0.015557 | 0.309268  | 0.000724 | 102.682     | 7.618974     | 1.00072567   | 5.956E-13    |
| 13C2001               | 600 °C    | 51.574913 | 0.046835 | 0.615646  | 0.012803 | 0.168253  | 0.000288 | 102.718     | 7.624411     | 1.00072592   | 1.288E-12    |
| 13C2002               | 700 °C ✓  | 22.249971 | 0.024080 | 0.523772  | 0.010724 | 0.072711  | 0.000331 | 102.737     | 7.627235     | 1.00072606   | 6.066E-13    |
| 13C2004               | 800 °C ✓  | 16.871263 | 0.023248 | 0.538376  | 0.011206 | 0.054615  | 0.000250 | 102.773     | 7.632677     | 1.00072631   | 4.019E-13    |
| 13C2005               | 900 °C ✓  | 18.113678 | 0.026314 | 0.592321  | 0.012357 | 0.058896  | 0.000430 | 102.791     | 7.635400     | 1.00072644   | 2.446E-13    |
| 13C2007               | 1050 °C ✓ | 28.624206 | 0.034118 | 1.048536  | 0.021527 | 0.094823  | 0.000270 | 102.828     | 7.640952     | 1.00072670   | 6.101E-13    |
| 13C2008               | 1250 °C ✓ | 34.353046 | 0.046701 | 1.963726  | 0.040438 | 0.113521  | 0.000303 | 102.847     | 7.643783     | 1.00072683   | 1.586E-12    |
| 13C2010               | 1400 °C ✓ | 28.547978 | 0.050350 | 3.030911  | 0.062320 | 0.094215  | 0.000352 | 102.882     | 7.649132     | 1.00072708   | 3.680E-13    |



| Procedure<br>Blanks |         | 36Ar<br>[V] | 1σ        | 37Ar<br>[V] | 1σ        | 38Ar<br>[V] | 1σ        | 39Ar<br>[V] | 1σ        | 40Ar<br>[V] | 1σ        |
|---------------------|---------|-------------|-----------|-------------|-----------|-------------|-----------|-------------|-----------|-------------|-----------|
| 13C1999             | 500 °C  | 0.0002684   | 0.0000113 | 0.0000211   | 0.0000156 | 0.0000005   | 0.0000027 | 0.0000092   | 0.0000095 | 0.0008254   | 0.0000194 |
| 13C2001             | 600 °C  | 0.0003532   | 0.0000119 | 0.0000238   | 0.0000078 | 0.0000231   | 0.0000085 | 0.0000458   | 0.0000181 | 0.0093799   | 0.0000319 |
| 13C2002             | 700 °C  | 0.0003532   | 0.0000119 | 0.0000238   | 0.0000078 | 0.0000231   | 0.0000085 | 0.0000458   | 0.0000181 | 0.0093799   | 0.0000319 |
| 13C2004             | 800 °C  | 0.0003262   | 0.0000123 | 0.0000344   | 0.0000179 | 0.0000108   | 0.0000171 | 0.0000744   | 0.0000286 | 0.0032252   | 0.0000898 |
| 13C2005             | 900 °C  | 0.0003262   | 0.0000123 | 0.0000344   | 0.0000179 | 0.0000108   | 0.0000171 | 0.0000744   | 0.0000286 | 0.0032252   | 0.0000898 |
| 13C2007             | 1050 °C | 0.0003262   | 0.0000123 | 0.0000505   | 0.0000135 | 0.0000398   | 0.0000171 | 0.0001131   | 0.0000128 | 0.0025162   | 0.0000667 |
| 13C2008             | 1250 °C | 0.0003262   | 0.0000123 | 0.0000505   | 0.0000135 | 0.0000398   | 0.0000171 | 0.0001131   | 0.0000128 | 0.0025162   | 0.0000667 |
| 13C2010             | 1400 °C | 0.0003264   | 0.0000122 | 0.0000391   | 0.0000192 | 0.0000100   | 0.0000136 | 0.0000960   | 0.0000225 | 0.0029901   | 0.0000983 |



| OSU Argon Geochronology Lab |         |             |           |           |        |                |           |           |        |             |           |           |        |             |           |           |        |                 |           |           |        |             |
|-----------------------------|---------|-------------|-----------|-----------|--------|----------------|-----------|-----------|--------|-------------|-----------|-----------|--------|-------------|-----------|-----------|--------|-----------------|-----------|-----------|--------|-------------|
| Intercept<br>Values         |         | 36Ar<br>[V] | 1σ        | r2        |        | 37Ar<br>[V]    | 1σ        | r2        |        | 38Ar<br>[V] | 1σ        | r2        |        | 39Ar<br>[V] | 1σ        | r2        |        | 40Ar<br>[V]     | 1σ        | r2        |        |             |
|                             | 13C1999 | 500 °C      | 0.0106083 | 0.0000090 | 0.9987 | EXP #          | 0.0031522 | 0.0000160 | 0.9430 | EXP #       | 0.0031133 | 0.0000213 | 0.6430 | LIN #       | 0.0325101 | 0.0000603 | 0.9987 | LIN # 3         | 2.9837142 | 0.0010579 | 0.9998 | EXP # 2 3 4 |
|                             | 13C2001 | 600 °C      | 0.0221764 | 0.0000298 | 0.9973 | LIN # 5 9      | 0.0104040 | 0.0000447 | 0.5909 | EXP #       | 0.0084751 | 0.0000343 | 0.8535 | LIN #       | 0.1262067 | 0.0001096 | 0.9984 | EXP # 3 6 9     | 6.4616033 | 0.0014397 | 0.9998 | EXP #       |
|                             | 13C2002 | 700 °C      | 0.0106488 | 0.0000444 | 0.9726 | LIN #          | 0.0096607 | 0.0000214 | 0.9817 | EXP # 5 7   | 0.0058457 | 0.0000301 | 0.9133 | LIN #       | 0.1377681 | 0.0001230 | 0.9949 | LIN # 2         | 3.0480353 | 0.0018134 | 0.9993 | EXP # 2 3   |
|                             | 13C2004 | 800 °C      | 0.0070865 | 0.0000270 | 0.9826 | EXP # 1        | 0.0086872 | 0.0000326 | 0.9740 | EXP # 2     | 0.0041886 | 0.0000233 | 0.9065 | LIN #       | 0.1204648 | 0.0001513 | 0.9956 | EXP # 8         | 2.0173483 | 0.0010280 | 0.9996 | EXP # 2 3   |
|                             | 13C2005 | 900 °C      | 0.0044591 | 0.0000269 | 0.9520 | LIN # 1 4      | 0.0054289 | 0.0000163 | 0.9811 | EXP #       | 0.0023659 | 0.0000267 | 0.6348 | LIN #       | 0.0683193 | 0.0000873 | 0.9932 | EXP # 5 9       | 1.2290374 | 0.0006634 | 0.9992 | EXP # 1     |
|                             | 13C2007 | 1050 °C     | 0.0108283 | 0.0000244 | 0.9943 | LIN # 3 8 9    | 0.0151132 | 0.0000365 | 0.9907 | EXP # 1     | 0.0044995 | 0.0000279 | 0.7468 | LIN #       | 0.1078367 | 0.0001231 | 0.9689 | EXP # 2 7 8     | 3.0601838 | 0.0009666 | 0.9998 | EXP # 2 11  |
|                             | 13C2008 | 1250 °C     | 0.0275607 | 0.0000614 | 0.9949 | EXP # 2 6 8 10 | 0.0611359 | 0.0001783 | 0.9911 | EXP # 2 5 8 | 0.0109083 | 0.0000243 | 0.9604 | LIN #       | 0.2334651 | 0.0003140 | 0.8672 | EXP # 1 2 6 7 9 | 7.9517012 | 0.0014676 | 0.9998 | EXP #       |
|                             | 13C2010 | 1400 °C     | 0.0066374 | 0.0000180 | 0.9926 | LIN # 1        | 0.0263432 | 0.0000657 | 0.9956 | EXP # 5     | 0.0026817 | 0.0000153 | 0.8311 | LIN #       | 0.0652453 | 0.0000902 | 0.9660 | EXP # 3 4 8     | 1.8472871 | 0.0019099 | 0.9982 | EXP # 2 3   |



| OSU Argon Geochronology Lab |         |         |        |            |                   |              |      |               |                  |       |                     |                    |     |            |       |               |     |        |       |              |                        |     |       |      |      |     |        |             |       |       |         |           |            |     |
|-----------------------------|---------|---------|--------|------------|-------------------|--------------|------|---------------|------------------|-------|---------------------|--------------------|-----|------------|-------|---------------|-----|--------|-------|--------------|------------------------|-----|-------|------|------|-----|--------|-------------|-------|-------|---------|-----------|------------|-----|
| Sample Parameters           |         |         | Sample | Material   | Location          | Analyst      | Temp | Standard Name | Standard (in Ma) | %1σ   | Standard Reference  | Standard 40Ar/39Ar | %1σ | J          | %1σ   | Air 40Ar/36Ar | %1σ | MDF    | %1σ   | Volume Ratio | Sensitivity (mol/volt) | Day | Month | Year | Hour | Min | Resist | Irradiation | X-pos | Y-pos | Z/H-pos | Project   | Experiment | Nmb |
|                             | 13C1999 | 500 °C  | 156-3  | Groundmass | Kerguelen Plateau | Trevor Smith | 500  | FCT-3         | 28.201           | 0.083 | Kuiper et al., 2008 |                    |     | 0.00163701 | 0.247 |               |     | 1.0092 | 0.001 | 0.9983       | 2E-13                  | 17  | JUL   | 2013 | 8    | 23  | 1      | OSU2C13     | 0.00  | 0.00  | 26.00   | Kerguelen | 13C1999    | 01  |
|                             | 13C2001 | 600 °C  | 156-3  | Groundmass | Kerguelen Plateau | Trevor Smith | 600  | FCT-3         | 28.201           | 0.083 | Kuiper et al., 2008 |                    |     | 0.00163701 | 0.247 |               |     | 1.0092 | 0.001 | 0.9984       | 2E-13                  | 17  | JUL   | 2013 | 9    | 15  | 1      | OSU2C13     | 0.00  | 0.00  | 26.00   | Kerguelen | 13C1999    | 01  |
|                             | 13C2002 | 700 °C  | 156-3  | Groundmass | Kerguelen Plateau | Trevor Smith | 700  | FCT-3         | 28.201           | 0.083 | Kuiper et al., 2008 |                    |     | 0.00163701 | 0.247 |               |     | 1.0092 | 0.001 | 0.9982       | 2E-13                  | 17  | JUL   | 2013 | 9    | 42  | 1      | OSU2C13     | 0.00  | 0.00  | 26.00   | Kerguelen | 13C1999    | 01  |
|                             | 13C2004 | 800 °C  | 156-3  | Groundmass | Kerguelen Plateau | Trevor Smith | 800  | FCT-3         | 28.201           | 0.083 | Kuiper et al., 2008 |                    |     | 0.00163701 | 0.247 |               |     | 1.0092 | 0.001 | 0.9978       | 2E-13                  | 17  | JUL   | 2013 | 10   | 34  | 1      | OSU2C13     | 0.00  | 0.00  | 26.00   | Kerguelen | 13C1999    | 01  |
|                             | 13C2005 | 900 °C  | 156-3  | Groundmass | Kerguelen Plateau | Trevor Smith | 900  | FCT-3         | 28.201           | 0.083 | Kuiper et al., 2008 |                    |     | 0.00163701 | 0.247 |               |     | 1.0092 | 0.001 | 0.9978       | 2E-13                  | 17  | JUL   | 2013 | 11   | 0   | 1      | OSU2C13     | 0.00  | 0.00  | 26.00   | Kerguelen | 13C1999    | 01  |
|                             | 13C2007 | 1050 °C | 156-3  | Groundmass | Kerguelen Plateau | Trevor Smith | 1050 | FCT-3         | 28.201           | 0.083 | Kuiper et al., 2008 |                    |     | 0.00163701 | 0.247 |               |     | 1.0092 | 0.001 | 0.9977       | 2E-13                  | 17  | JUL   | 2013 | 11   | 53  | 1      | OSU2C13     | 0.00  | 0.00  | 26.00   | Kerguelen | 13C1999    | 01  |
|                             | 13C2008 | 1250 °C | 156-3  | Groundmass | Kerguelen Plateau | Trevor Smith | 1250 | FCT-3         | 28.201           | 0.083 | Kuiper et al., 2008 |                    |     | 0.00163701 | 0.247 |               |     | 1.0092 | 0.001 | 0.9977       | 2E-13                  | 17  | JUL   | 2013 | 12   | 20  | 1      | OSU2C13     | 0.00  | 0.00  | 26.00   | Kerguelen | 13C1999    | 01  |
|                             | 13C2010 | 1400 °C | 156-3  | Groundmass | Kerguelen Plateau | Trevor Smith | 1400 | FCT-3         | 28.201           | 0.083 | Kuiper et al., 2008 |                    |     | 0.00163701 | 0.247 |               |     | 1.0092 | 0.001 | 0.9978       | 2E-13                  | 17  | JUL   | 2013 | 13   | 11  | 1      | OSU2C13     | 0.00  | 0.00  | 26.00   | Kerguelen | 13C1999    | 01  |



| Irradiation<br>Constants |         | OSU Argon Geochronology Lab |     |          |     |          |     |          |     |           |     |           |     |           |     |          |     |          |     |           |     |      |     |      |     |       |     |  |
|--------------------------|---------|-----------------------------|-----|----------|-----|----------|-----|----------|-----|-----------|-----|-----------|-----|-----------|-----|----------|-----|----------|-----|-----------|-----|------|-----|------|-----|-------|-----|--|
|                          |         | 40/36(a)                    | %1σ | 40/36(c) | %1σ | 38/36(a) | %1σ | 38/36(c) | %1σ | 39/37(ca) | %1σ | 38/37(ca) | %1σ | 36/37(ca) | %1σ | 40/39(k) | %1σ | 38/39(k) | %1σ | 36/38(cl) | %1σ | K/Ca | %1σ | K/Cl | %1σ | Ca/Cl | %1σ |  |
| 13C1999                  | 500 °C  | 295.5                       | 0   | 0.018    | 35  | 0.1869   | 0   | 1.493    | 3   | 0.000673  | 0   | 0.000139  | 0   | 0.000264  | 0   | 0.00101  | 0   | 0.01138  | 0   | 0         | 0   | 0.43 | 0   | 0    | 0   | 0     | 0   |  |
| 13C2001                  | 600 °C  | 295.5                       | 0   | 0.018    | 35  | 0.1869   | 0   | 1.493    | 3   | 0.000673  | 0   | 0.000139  | 0   | 0.000264  | 0   | 0.00101  | 0   | 0.01138  | 0   | 0         | 0   | 0.43 | 0   | 0    | 0   | 0     | 0   |  |
| 13C2002                  | 700 °C  | 295.5                       | 0   | 0.018    | 35  | 0.1869   | 0   | 1.493    | 3   | 0.000673  | 0   | 0.000139  | 0   | 0.000264  | 0   | 0.00101  | 0   | 0.01138  | 0   | 0         | 0   | 0.43 | 0   | 0    | 0   | 0     | 0   |  |
| 13C2004                  | 800 °C  | 295.5                       | 0   | 0.018    | 35  | 0.1869   | 0   | 1.493    | 3   | 0.000673  | 0   | 0.000139  | 0   | 0.000264  | 0   | 0.00101  | 0   | 0.01138  | 0   | 0         | 0   | 0.43 | 0   | 0    | 0   | 0     | 0   |  |
| 13C2005                  | 900 °C  | 295.5                       | 0   | 0.018    | 35  | 0.1869   | 0   | 1.493    | 3   | 0.000673  | 0   | 0.000139  | 0   | 0.000264  | 0   | 0.00101  | 0   | 0.01138  | 0   | 0         | 0   | 0.43 | 0   | 0    | 0   | 0     | 0   |  |
| 13C2007                  | 1050 °C | 295.5                       | 0   | 0.018    | 35  | 0.1869   | 0   | 1.493    | 3   | 0.000673  | 0   | 0.000139  | 0   | 0.000264  | 0   | 0.00101  | 0   | 0.01138  | 0   | 0         | 0   | 0.43 | 0   | 0    | 0   | 0     | 0   |  |
| 13C2008                  | 1250 °C | 295.5                       | 0   | 0.018    | 35  | 0.1869   | 0   | 1.493    | 3   | 0.000673  | 0   | 0.000139  | 0   | 0.000264  | 0   | 0.00101  | 0   | 0.01138  | 0   | 0         | 0   | 0.43 | 0   | 0    | 0   | 0     | 0   |  |
| 13C2010                  | 1400 °C | 295.5                       | 0   | 0.018    | 35  | 0.1869   | 0   | 1.493    | 3   | 0.000673  | 0   | 0.000139  | 0   | 0.000264  | 0   | 0.00101  | 0   | 0.01138  | 0   | 0         | 0   | 0.43 | 0   | 0    | 0   | 0     | 0   |  |



13C1999.AGE >>> 156-3 >>> KERGUELEN PROJECT

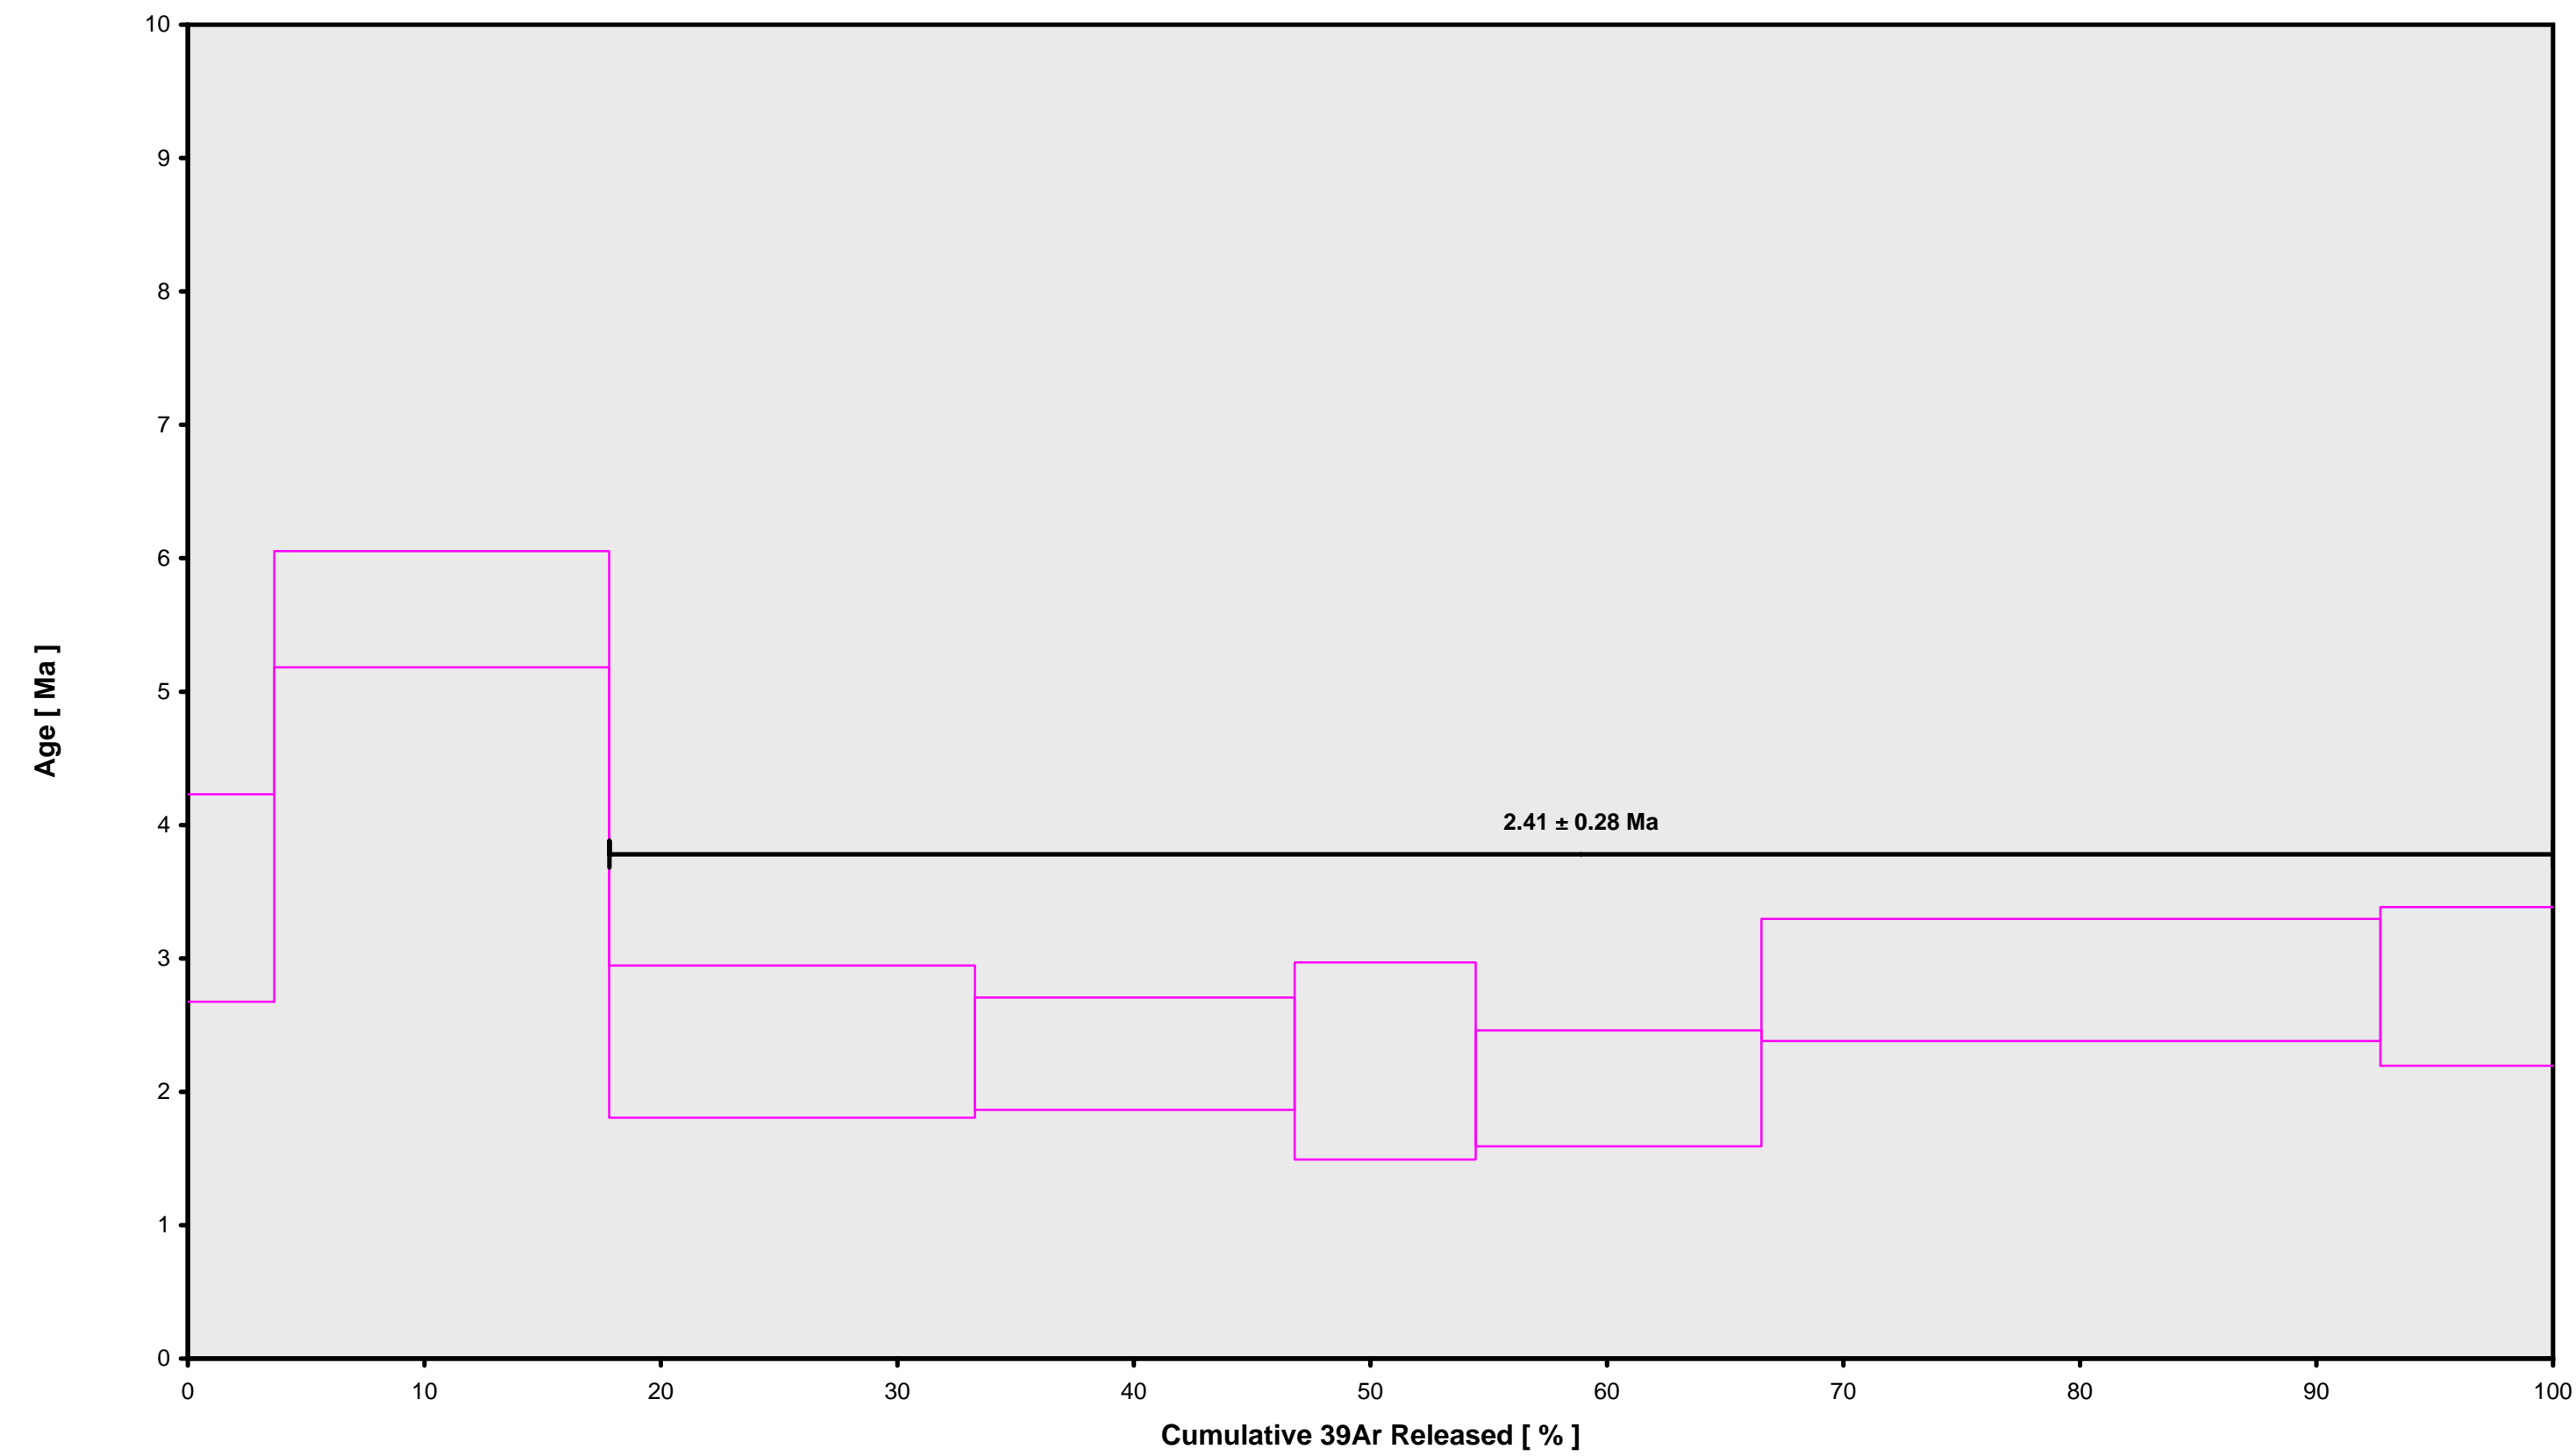

Ar-Ages in Ma

WEIGHTED PLATEAU

2.41 ± 0.28

TOTAL FUSION

2.96 ± 0.20

NORMAL ISOCHRON

1.83 ± 1.05

INVERSE ISOCHRON

1.82 ± 0.90

MSWD (PROBABILITY)

1.77 (11%)

Sample Info

Groundmass

Kerguelen Plateau

Trevor Smith

IRR = OSU2C13

J = 0.00163701 ± 0.00000405

RECALIBRATED AGE



13C1999.AGE >>> 156-3 >>> KERGUELEN PROJECT

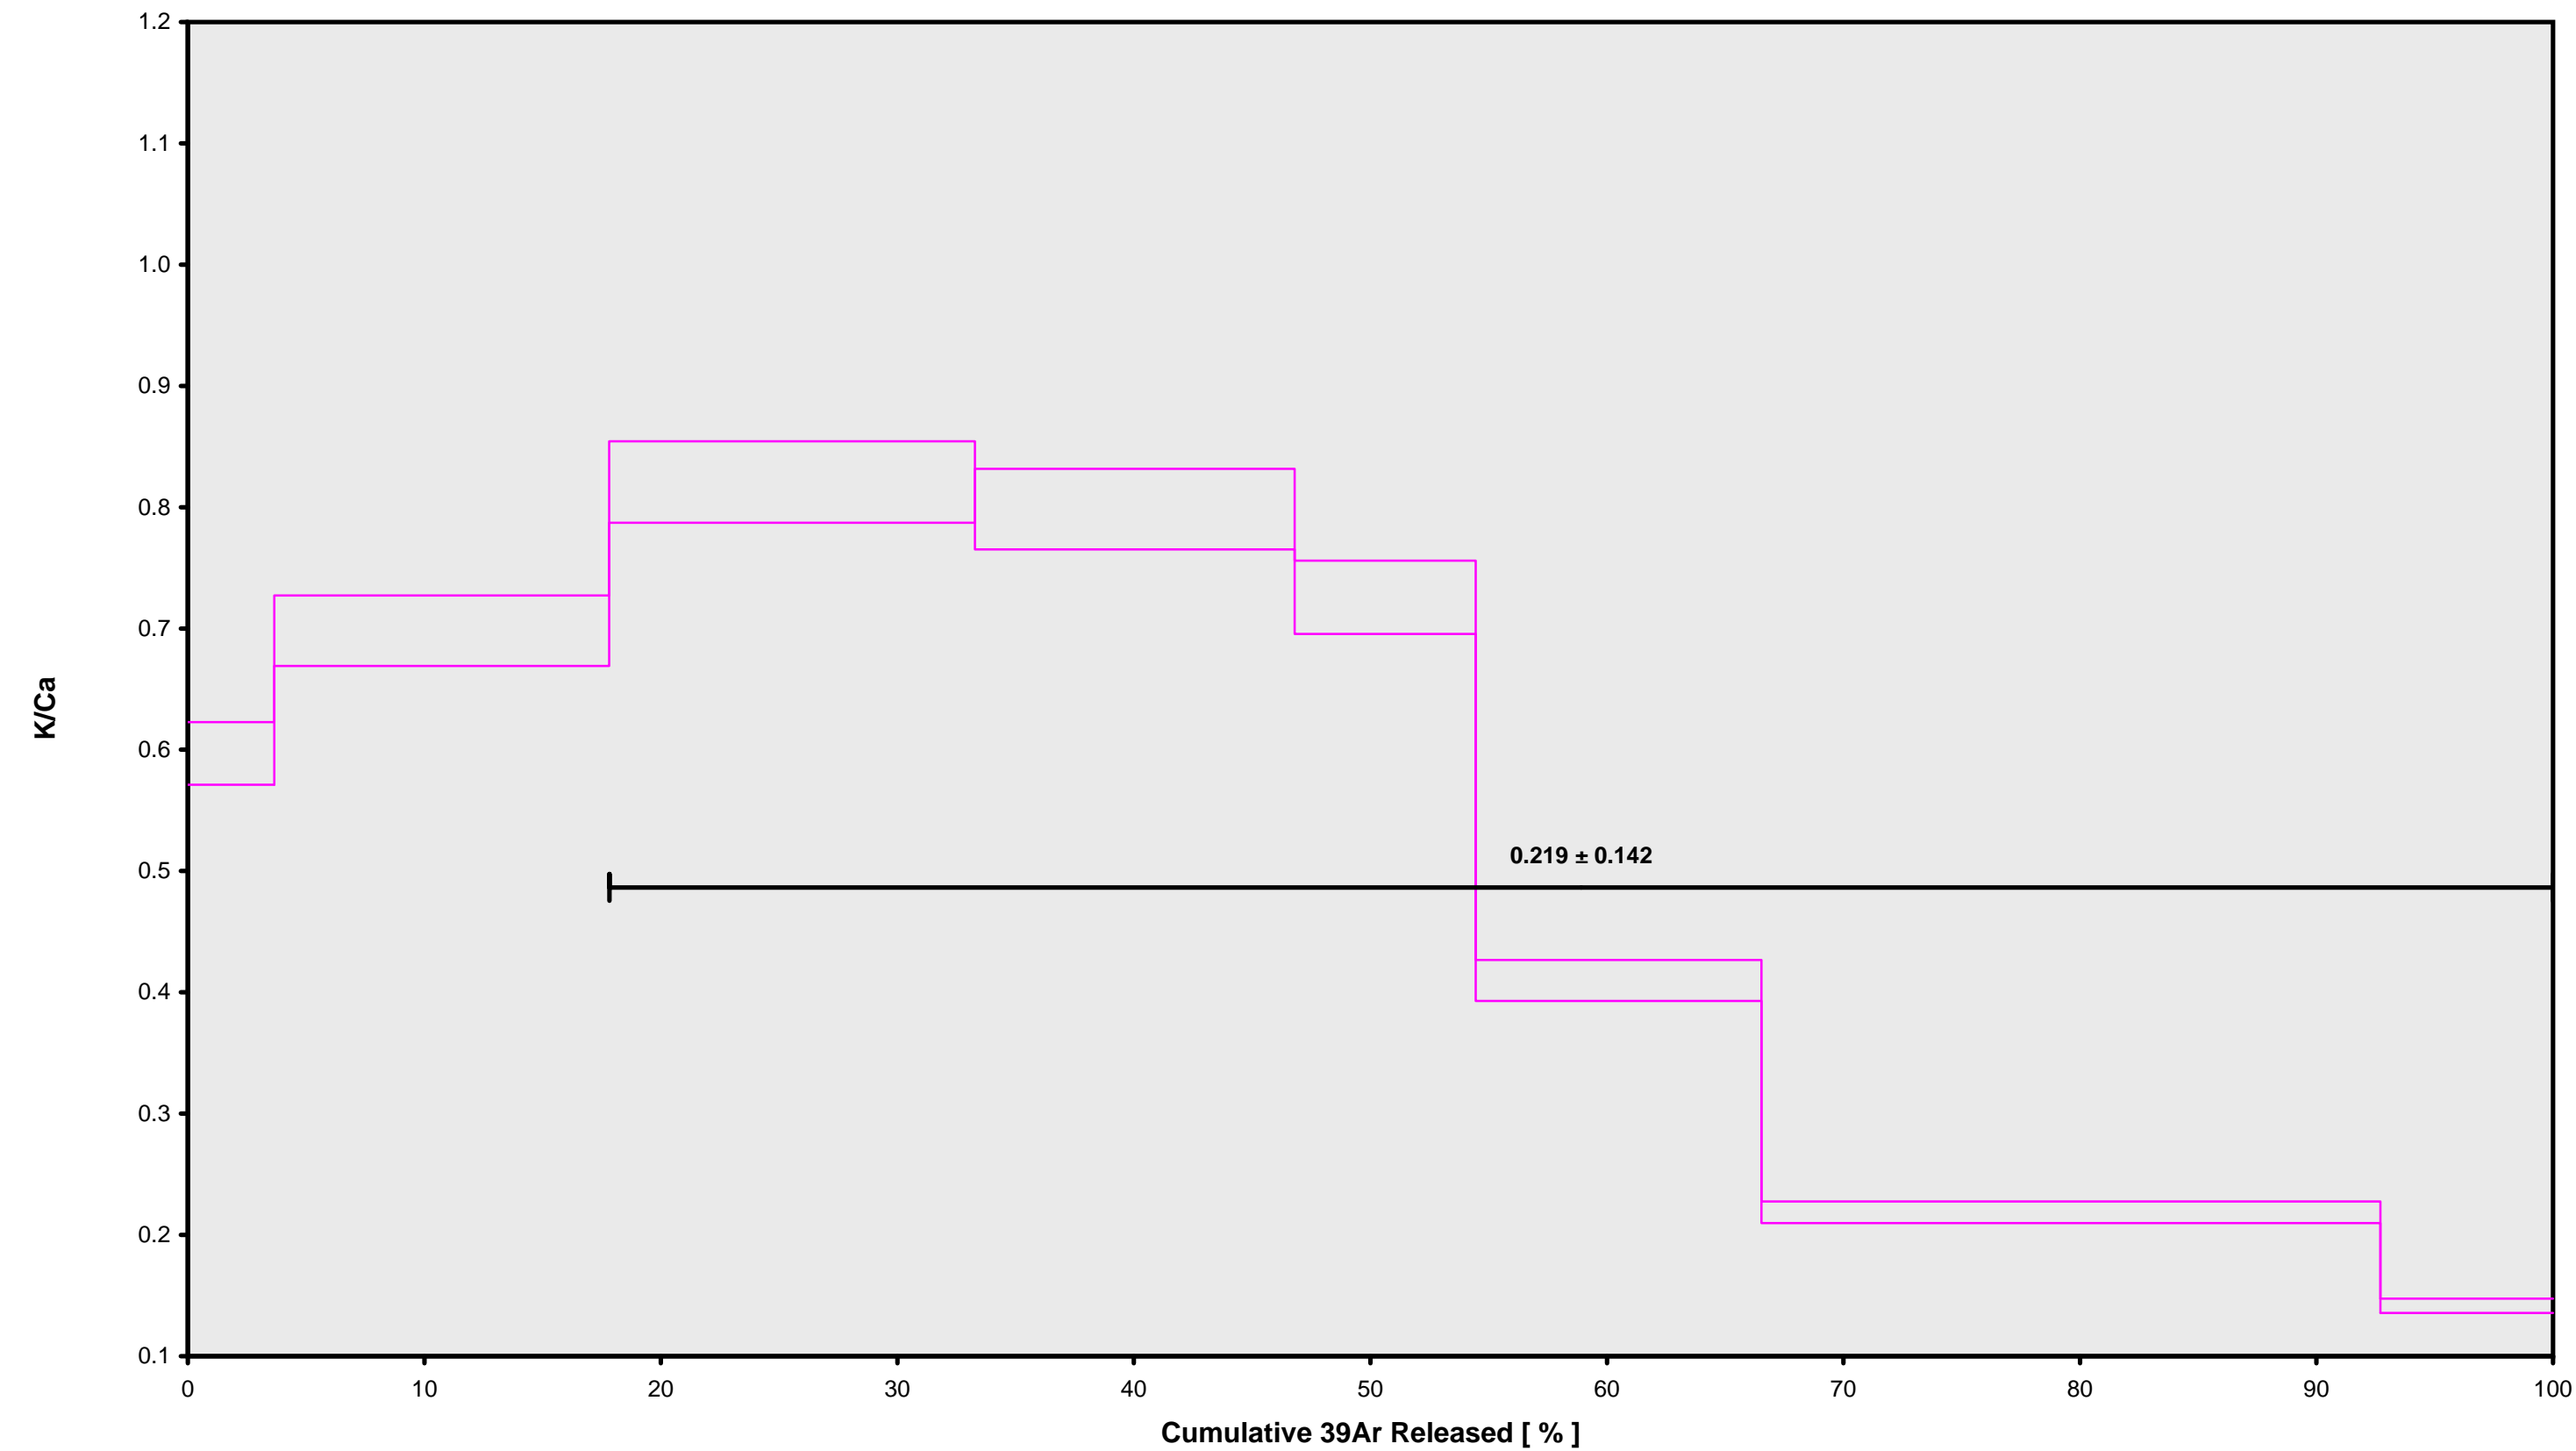

**Ar-Ages in Ma**

**WEIGHTED PLATEAU**

**2.41 ± 0.28**

**TOTAL FUSION**

**2.96 ± 0.20**

**NORMAL ISOCHRON**

**1.83 ± 1.05**

**INVERSE ISOCHRON**

**1.82 ± 0.90**

**Sample Info**

**Groundmass**

**Kerguelen Plateau**

**Trevor Smith**

**IRR = OSU2C13**

**J = 0.00163701 ± 0.00000405**

**RECALIBRATED AGE**



13C1999.AGE >>> 156-3 >>> KERGUELEN PROJECT

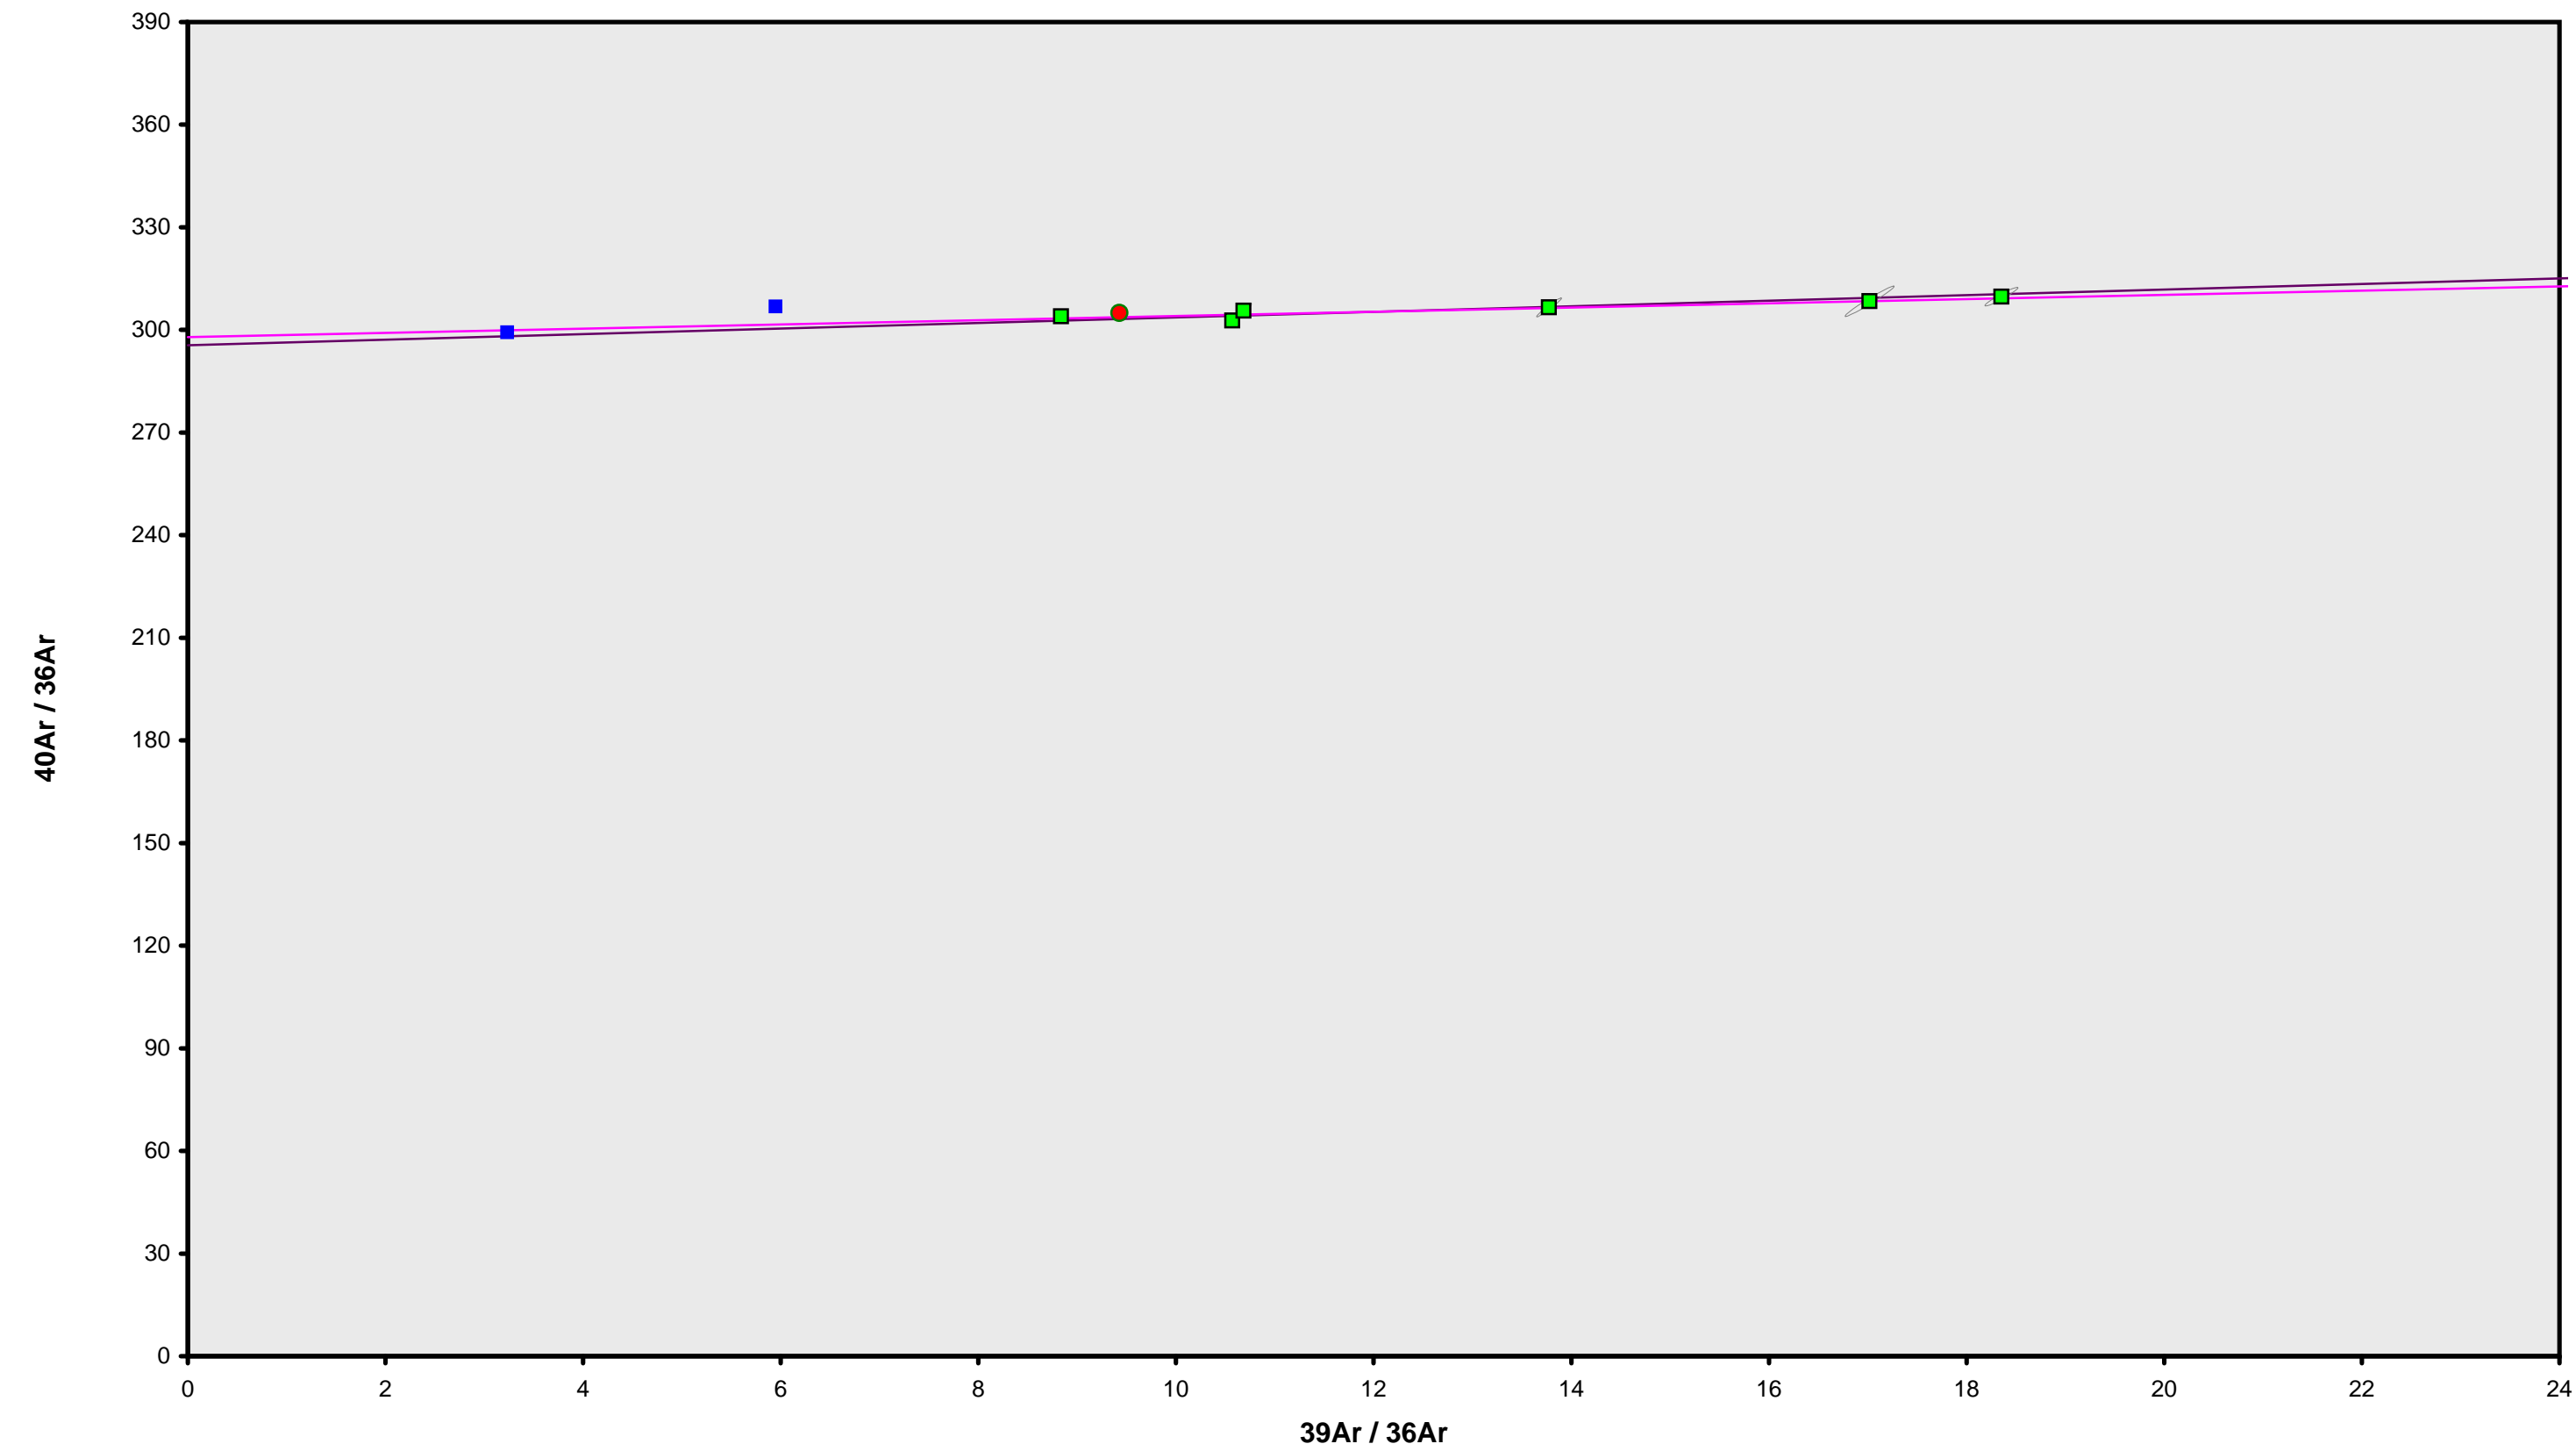

Ar-Ages in Ma

WEIGHTED PLATEAU

2.41 ± 0.28

TOTAL FUSION

2.96 ± 0.20

NORMAL ISOCHRON

1.83 ± 1.05

INVERSE ISOCHRON

1.82 ± 0.90

MSWD (PROBABILITY)

1.66 (16%)

40AR/36AR INTERCEPT

297.9 ± 4.1

Sample Info

Groundmass

Kerguelen Plateau

Trevor Smith

IRR = OSU2C13

J = 0.00163701 ± 0.00000405

RECALIBRATED AGE



13C1999.AGE >>> 156-3 >>> KERGUELEN PROJECT

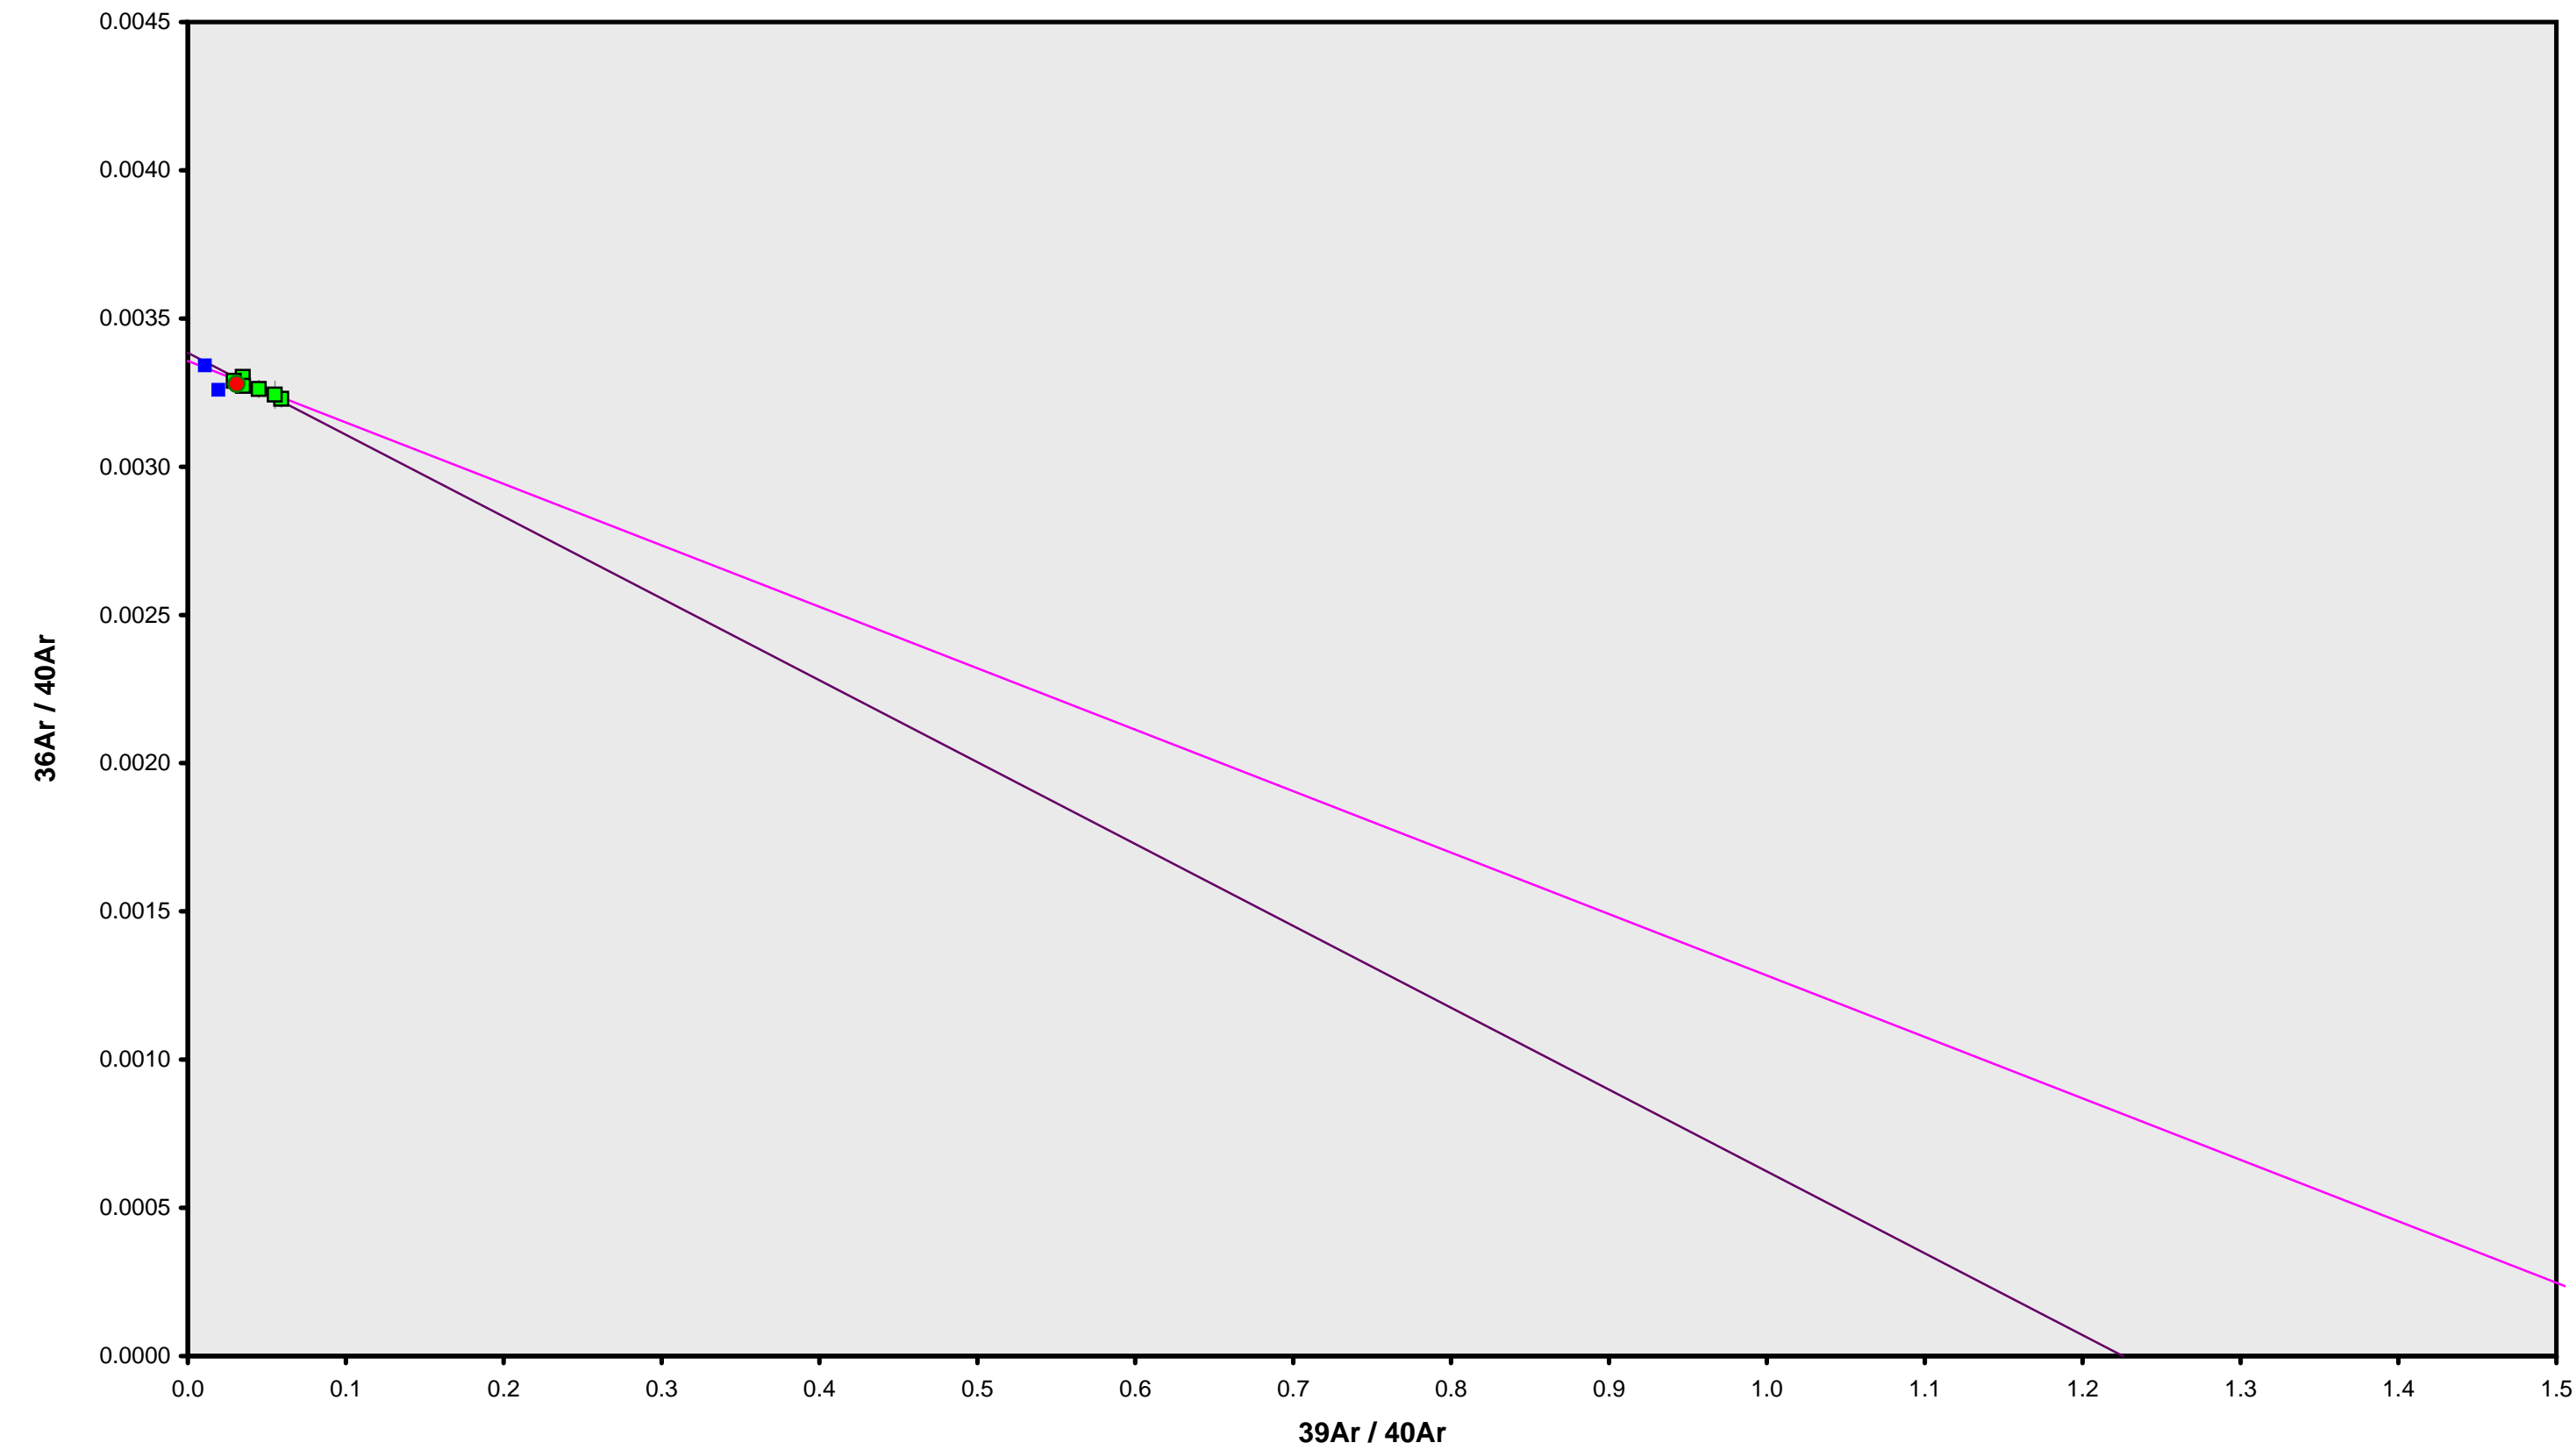

Ar-Ages in Ma

WEIGHTED PLATEAU

$2.41 \pm 0.28$

TOTAL FUSION

$2.96 \pm 0.20$

NORMAL ISOCHRON

$1.83 \pm 1.05$

INVERSE ISOCHRON

$1.82 \pm 0.90$

MSWD (PROBABILITY)

1.65 (16%)

SPREADING FACTOR

1.9%

40AR/36AR INTERCEPT

$297.9 \pm 4.1$

Sample Info

Groundmass

Kerguelen Plateau

Trevor Smith

IRR = OSU2C13

$J = 0.00163701 \pm 0.00000405$

RECALIBRATED AGE
