# Supplementary material
Source: publisher figshare collection journal article supplement (https://tandf.figshare.com/articles/dataset/_/3859920)
Supplement: Supplementary file 2 [file 1]

## Widespread Neogene volcanism on Central Kerguelen Plateau, Southern Indian Ocean

R. A. Duncan<sup>a</sup>, T. J. Falloon<sup>b,c</sup>, P. G. Quilty<sup>b,c</sup>, and M. F. Coffin<sup>b,c</sup>

<sup>a</sup>College of Earth, Ocean, and Atmospheric Sciences, Oregon State University, Corvallis OR 97331 USA

<sup>b</sup>School of Physical Sciences, University of Tasmania, Hobart 7001 Australia

<sup>c</sup>Institute for Marine and Antarctic Studies, University of Tasmania, Hobart 7001 Australia

email [rduncan@coas.oregonstate.edu](mailto:rduncan@coas.oregonstate.edu)

### SUPPLEMENTARY PAPERS

*Australian Journal of Earth Sciences* (2016) **63**,  
<http://dx.doi.org/10.1080/08120099.2016.1221857>

---

Copies of Supplementary Papers may be obtained from the Geological Society of Australia's website ([www.gsa.org.au](http://www.gsa.org.au)), the Australian Journal of Earth Sciences website ([www.ajes.com.au](http://www.ajes.com.au)) or from the National Library of Australia's Pandora archive (<http://nla.gov.au/nla.arc-25194>).

---

### SUPPLEMENTARY PAPER

**Electronic Annex A.** Complete ArArCALC data files for <sup>40</sup>Ar–<sup>39</sup>Ar incremental heating experiments on dredged rocks from Central Kerguelen Plateau.
